# Supplementary material for: Microbial-enrichment method enables high-throughput metagenomic characterization from host-rich samples
Source: Springer Nature journal article supplement (doi:10.1038/s41592-023-02025-4), 2023-10-12
Supplement: MOESM4 [file 41592_2023_2025_MOESM4_ESM.xlsx]

## Sheet: Table_S1
Taxonomy	1	2	3	Condition	Avg	T0_count
D_0__Bacteria;D_1__Bacteroidetes;D_2__Bacteroidia;D_3__Bacteroidales;D_4__Muribaculaceae;D_5__uncultured bacterium	0.233425	0.634153	0.440146	MEM	0.435908	0
D_0__Bacteria;D_1__Bacteroidetes;D_2__Bacteroidia;D_3__Bacteroidales;D_4__Muribaculaceae;D_5__uncultured bacterium	-0.5504	0.421738	0.267418	MolYsis	0.046252	0
D_0__Bacteria;D_1__Bacteroidetes;D_2__Bacteroidia;D_3__Bacteroidales;D_4__Muribaculaceae;D_5__uncultured bacterium	-0.988699	-0.360765	-0.936575	MolYsis+PK	-0.762013	0
D_0__Bacteria;D_1__Bacteroidetes;D_2__Bacteroidia;D_3__Bacteroidales;D_4__Muribaculaceae;D_5__uncultured bacterium	-0.0539388	0.208556	-0.20427	PMA	-0.016551	0
D_0__Bacteria;D_1__Bacteroidetes;D_2__Bacteroidia;D_3__Bacteroidales;D_4__Muribaculaceae;D_5__uncultured bacterium	-1.65073	-0.474721	-1.25173	QIAamp	-1.12573	0
D_0__Bacteria;D_1__Bacteroidetes;D_2__Bacteroidia;D_3__Bacteroidales;D_4__Muribaculaceae;D_5__uncultured organism	0.412195	-0.0549083	0.055558	MEM	0.137615	0
D_0__Bacteria;D_1__Bacteroidetes;D_2__Bacteroidia;D_3__Bacteroidales;D_4__Muribaculaceae;D_5__uncultured organism	0.0557094	0.179868	0.16064	MolYsis	0.132072	0
D_0__Bacteria;D_1__Bacteroidetes;D_2__Bacteroidia;D_3__Bacteroidales;D_4__Muribaculaceae;D_5__uncultured organism	-3.05795	-2.13153	-2.73586	MolYsis+PK	-2.64178	0
D_0__Bacteria;D_1__Bacteroidetes;D_2__Bacteroidia;D_3__Bacteroidales;D_4__Muribaculaceae;D_5__uncultured organism	0.109347	-0.365995	-0.246471	PMA	-0.167706	0
D_0__Bacteria;D_1__Bacteroidetes;D_2__Bacteroidia;D_3__Bacteroidales;D_4__Muribaculaceae;D_5__uncultured organism	0.168662	0.109478	0	QIAamp	0.0927136	0
D_0__Bacteria;D_1__Bacteroidetes;D_2__Bacteroidia;D_3__Bacteroidales;D_4__Muribaculaceae;__	0.502233	0.253757	0.255501	MEM	0.337163	0
D_0__Bacteria;D_1__Bacteroidetes;D_2__Bacteroidia;D_3__Bacteroidales;D_4__Muribaculaceae;__	-0.824523	-0.0401891	0.0268001	MolYsis	-0.279304	0
D_0__Bacteria;D_1__Bacteroidetes;D_2__Bacteroidia;D_3__Bacteroidales;D_4__Muribaculaceae;__	-2.15859	-1.24101	-2.27753	MolYsis+PK	-1.89238	0
D_0__Bacteria;D_1__Bacteroidetes;D_2__Bacteroidia;D_3__Bacteroidales;D_4__Muribaculaceae;__	0.00907358	0.0390998	-0.527512	PMA	-0.15978	0
D_0__Bacteria;D_1__Bacteroidetes;D_2__Bacteroidia;D_3__Bacteroidales;D_4__Muribaculaceae;__	-0.210307	-0.378512	-0.29956	QIAamp	-0.296126	0
D_0__Bacteria;D_1__Bacteroidetes;D_2__Bacteroidia;D_3__Bacteroidales;D_4__Prevotellaceae;D_5__Alloprevotella	-0.176059	-0.0473057	-0.0750507	MEM	-0.0994718	0
D_0__Bacteria;D_1__Bacteroidetes;D_2__Bacteroidia;D_3__Bacteroidales;D_4__Prevotellaceae;D_5__Alloprevotella	-3.82631	-1.22628	-3.23799	MolYsis	-2.76353	0
D_0__Bacteria;D_1__Bacteroidetes;D_2__Bacteroidia;D_3__Bacteroidales;D_4__Prevotellaceae;D_5__Alloprevotella	-3.93734	-2.49476	-4.06111	MolYsis+PK	-3.49774	0
D_0__Bacteria;D_1__Bacteroidetes;D_2__Bacteroidia;D_3__Bacteroidales;D_4__Prevotellaceae;D_5__Alloprevotella	-0.72322	0.0458037	-0.739183	PMA	-0.4722	0
D_0__Bacteria;D_1__Bacteroidetes;D_2__Bacteroidia;D_3__Bacteroidales;D_4__Prevotellaceae;D_5__Alloprevotella	-0.142409	-1.02346	-0.277735	QIAamp	-0.481201	0
D_0__Bacteria;D_1__Bacteroidetes;D_2__Bacteroidia;D_3__Bacteroidales;D_4__Prevotellaceae;D_5__Paraprevotella	0.148523	0.374396	0.941106	MEM	0.488008	0
D_0__Bacteria;D_1__Bacteroidetes;D_2__Bacteroidia;D_3__Bacteroidales;D_4__Prevotellaceae;D_5__Paraprevotella	-2.20511	-1.75489	-1.32193	MolYsis	-1.76064	0
D_0__Bacteria;D_1__Bacteroidetes;D_2__Bacteroidia;D_3__Bacteroidales;D_4__Prevotellaceae;D_5__Paraprevotella	-1.79008	-1.58496	-1.47393	MolYsis+PK	-1.61632	0
D_0__Bacteria;D_1__Bacteroidetes;D_2__Bacteroidia;D_3__Bacteroidales;D_4__Prevotellaceae;D_5__Paraprevotella	-0.915608	0.245112	-0.395929	PMA	-0.355475	0
D_0__Bacteria;D_1__Bacteroidetes;D_2__Bacteroidia;D_3__Bacteroidales;D_4__Prevotellaceae;D_5__Paraprevotella	0.017278	0.415037	1.08406	QIAamp	0.50546	0
D_0__Bacteria;D_1__Bacteroidetes;D_2__Bacteroidia;D_3__Bacteroidales;D_4__Prevotellaceae;D_5__Prevotellaceae UCG-001	-1.1268	0.790495	0.0441439	MEM	-0.097388	0
D_0__Bacteria;D_1__Bacteroidetes;D_2__Bacteroidia;D_3__Bacteroidales;D_4__Prevotellaceae;D_5__Prevotellaceae UCG-001	-2.92745	-0.236508	-2.39823	MolYsis	-1.85406	0
D_0__Bacteria;D_1__Bacteroidetes;D_2__Bacteroidia;D_3__Bacteroidales;D_4__Prevotellaceae;D_5__Prevotellaceae UCG-001	-4.79344	-2.57672	-4.21181	MolYsis+PK	-3.86066	0
D_0__Bacteria;D_1__Bacteroidetes;D_2__Bacteroidia;D_3__Bacteroidales;D_4__Prevotellaceae;D_5__Prevotellaceae UCG-001	-1.093	0.695048	-1.00473	PMA	-0.467559	0
D_0__Bacteria;D_1__Bacteroidetes;D_2__Bacteroidia;D_3__Bacteroidales;D_4__Prevotellaceae;D_5__Prevotellaceae UCG-001	-1.76084	0.570012	0.0187518	QIAamp	-0.390693	0
D_0__Bacteria;D_1__Bacteroidetes;D_2__Bacteroidia;D_3__Bacteroidales;D_4__Rikenellaceae;D_5__Alistipes	0.554119	0.26336	0.342193	MEM	0.386557	0
D_0__Bacteria;D_1__Bacteroidetes;D_2__Bacteroidia;D_3__Bacteroidales;D_4__Rikenellaceae;D_5__Alistipes	-4.13561	-3.77454	-4.01103	MolYsis	-3.97373	0
D_0__Bacteria;D_1__Bacteroidetes;D_2__Bacteroidia;D_3__Bacteroidales;D_4__Rikenellaceae;D_5__Alistipes	-3.08116	-2.68394	-3.27407	MolYsis+PK	-3.01306	0
D_0__Bacteria;D_1__Bacteroidetes;D_2__Bacteroidia;D_3__Bacteroidales;D_4__Rikenellaceae;D_5__Alistipes	0.280294	-0.156565	0.291788	PMA	0.138505	0
D_0__Bacteria;D_1__Bacteroidetes;D_2__Bacteroidia;D_3__Bacteroidales;D_4__Rikenellaceae;D_5__Alistipes	-3.22134	-4.57523	-1.98594	QIAamp	-3.26084	0
D_0__Bacteria;D_1__Bacteroidetes;D_2__Bacteroidia;D_3__Bacteroidales;D_4__Rikenellaceae;D_5__Rikenella	0.7176	0.814209	0.67611	MEM	0.735973	0
D_0__Bacteria;D_1__Bacteroidetes;D_2__Bacteroidia;D_3__Bacteroidales;D_4__Rikenellaceae;D_5__Rikenella	-3.16427	-4.57931	-2.52356	MolYsis	-3.42238	2
D_0__Bacteria;D_1__Bacteroidetes;D_2__Bacteroidia;D_3__Bacteroidales;D_4__Rikenellaceae;D_5__Rikenella	-1.79141	-0.621488	-2.61667	MolYsis+PK	-1.67652	0
D_0__Bacteria;D_1__Bacteroidetes;D_2__Bacteroidia;D_3__Bacteroidales;D_4__Rikenellaceae;D_5__Rikenella	0.366128	0.405992	-0.114171	PMA	0.219316	0
D_0__Bacteria;D_1__Bacteroidetes;D_2__Bacteroidia;D_3__Bacteroidales;D_4__Rikenellaceae;D_5__Rikenella	-0.537657	-0.321928	0.371256	QIAamp	-0.162776	0
D_0__Bacteria;D_1__Bacteroidetes;D_2__Bacteroidia;D_3__Bacteroidales;D_4__Rikenellaceae;D_5__Rikenellaceae RC9 gut group	0.17585	0.392317	-0.169925	MEM	0.132747	0
D_0__Bacteria;D_1__Bacteroidetes;D_2__Bacteroidia;D_3__Bacteroidales;D_4__Rikenellaceae;D_5__Rikenellaceae RC9 gut group	-3.42731	-1.67242	-1.84234	MolYsis	-2.31402	3
D_0__Bacteria;D_1__Bacteroidetes;D_2__Bacteroidia;D_3__Bacteroidales;D_4__Rikenellaceae;D_5__Rikenellaceae RC9 gut group	-2.94753	-1.67242	-1.84234	MolYsis+PK	-2.1541	2
D_0__Bacteria;D_1__Bacteroidetes;D_2__Bacteroidia;D_3__Bacteroidales;D_4__Rikenellaceae;D_5__Rikenellaceae RC9 gut group	0.0524674	0	-1.84234	PMA	-0.596626	1
D_0__Bacteria;D_1__Bacteroidetes;D_2__Bacteroidia;D_3__Bacteroidales;D_4__Rikenellaceae;D_5__Rikenellaceae RC9 gut group	-3.42731	-1.67242	-1.84234	QIAamp	-2.31402	3
D_0__Bacteria;D_1__Bacteroidetes;D_2__Bacteroidia;D_3__Bacteroidales;D_4__Tannerellaceae;D_5__Parabacteroides	0.165059	-0.130397	0.520007	MEM	0.18489	0
D_0__Bacteria;D_1__Bacteroidetes;D_2__Bacteroidia;D_3__Bacteroidales;D_4__Tannerellaceae;D_5__Parabacteroides	-2.71681	-2.01792	-2.72792	MolYsis	-2.48755	1
D_0__Bacteria;D_1__Bacteroidetes;D_2__Bacteroidia;D_3__Bacteroidales;D_4__Tannerellaceae;D_5__Parabacteroides	-2.45943	-3.01792	-1.82103	MolYsis+PK	-2.43279	0
D_0__Bacteria;D_1__Bacteroidetes;D_2__Bacteroidia;D_3__Bacteroidales;D_4__Tannerellaceae;D_5__Parabacteroides	0.540568	-0.150025	0.359542	PMA	0.250028	0
D_0__Bacteria;D_1__Bacteroidetes;D_2__Bacteroidia;D_3__Bacteroidales;D_4__Tannerellaceae;D_5__Parabacteroides	0.347923	-0.130397	1.3055	QIAamp	0.507676	0
D_0__Bacteria;D_1__Cyanobacteria;D_2__Melainabacteria;D_3__Gastranaerophilales;__;__	-0.652077	-0.744743	-0.59309	MEM	-0.663303	0
D_0__Bacteria;D_1__Cyanobacteria;D_2__Melainabacteria;D_3__Gastranaerophilales;__;__	-1.13185	-1.70627	-1.89077	MolYsis	-1.5763	1
D_0__Bacteria;D_1__Cyanobacteria;D_2__Melainabacteria;D_3__Gastranaerophilales;__;__	-1.13185	-2.78427	-2.95217	MolYsis+PK	-2.28943	1
D_0__Bacteria;D_1__Cyanobacteria;D_2__Melainabacteria;D_3__Gastranaerophilales;__;__	-0.137504	0.630766	-0.475733	PMA	0.00584308	0
D_0__Bacteria;D_1__Cyanobacteria;D_2__Melainabacteria;D_3__Gastranaerophilales;__;__	-1.13185	-1.31034	-0.967939	QIAamp	-1.13671	1
D_0__Bacteria;D_1__Deferribacteres;D_2__Deferribacteres;D_3__Deferribacterales;D_4__Deferribacteraceae;D_5__Mucispirillum	0.459432	-0.222392	-0.0506261	MEM	0.0621377	0
D_0__Bacteria;D_1__Deferribacteres;D_2__Deferribacteres;D_3__Deferribacterales;D_4__Deferribacteraceae;D_5__Mucispirillum	-1.67242	-3.8017	-1.27302	MolYsis	-2.24905	2
D_0__Bacteria;D_1__Deferribacteres;D_2__Deferribacteres;D_3__Deferribacterales;D_4__Deferribacteraceae;D_5__Mucispirillum	-1.67242	-1.42884	0.665581	MolYsis+PK	-0.811894	1
D_0__Bacteria;D_1__Deferribacteres;D_2__Deferribacteres;D_3__Deferribacterales;D_4__Deferribacteraceae;D_5__Mucispirillum	1.49185	-1.32193	3.16993	PMA	1.11328	0
D_0__Bacteria;D_1__Deferribacteres;D_2__Deferribacteres;D_3__Deferribacterales;D_4__Deferribacteraceae;D_5__Mucispirillum	-1.67242	-3.8017	-2.5304	QIAamp	-2.66817	3
D_0__Bacteria;D_1__Epsilonbacteraeota;D_2__Campylobacteria;D_3__Campylobacterales;D_4__Helicobacteraceae;D_5__Helicobacter	0.208717	-0.0832805	-0.896907	MEM	-0.257157	0
D_0__Bacteria;D_1__Epsilonbacteraeota;D_2__Campylobacteria;D_3__Campylobacterales;D_4__Helicobacteraceae;D_5__Helicobacter	-5.40034	-7.15608	-4.33985	MolYsis	-5.63209	1
D_0__Bacteria;D_1__Epsilonbacteraeota;D_2__Campylobacteria;D_3__Campylobacterales;D_4__Helicobacteraceae;D_5__Helicobacter	-3.02748	-3.63252	1.96165	MolYsis+PK	-1.56612	0
D_0__Bacteria;D_1__Epsilonbacteraeota;D_2__Campylobacteria;D_3__Campylobacterales;D_4__Helicobacteraceae;D_5__Helicobacter	-0.946561	-0.534031	2.85368	PMA	0.457694	0
D_0__Bacteria;D_1__Epsilonbacteraeota;D_2__Campylobacteria;D_3__Campylobacterales;D_4__Helicobacteraceae;D_5__Helicobacter	-2.59864	-2.51946	-1.848	QIAamp	-2.32203	0
D_0__Bacteria;D_1__Firmicutes;D_2__Bacilli;D_3__Lactobacillales;D_4__Lactobacillaceae;D_5__Lactobacillus	0.690696	-0.279116	1.00735	MEM	0.472977	0
D_0__Bacteria;D_1__Firmicutes;D_2__Bacilli;D_3__Lactobacillales;D_4__Lactobacillaceae;D_5__Lactobacillus	0.914086	0.153181	1.51621	MolYsis	0.861159	0
D_0__Bacteria;D_1__Firmicutes;D_2__Bacilli;D_3__Lactobacillales;D_4__Lactobacillaceae;D_5__Lactobacillus	1.65893	0.694081	1.47026	MolYsis+PK	1.27442	0
D_0__Bacteria;D_1__Firmicutes;D_2__Bacilli;D_3__Lactobacillales;D_4__Lactobacillaceae;D_5__Lactobacillus	1.06286	-1.54839	1.28712	PMA	0.267195	0
D_0__Bacteria;D_1__Firmicutes;D_2__Bacilli;D_3__Lactobacillales;D_4__Lactobacillaceae;D_5__Lactobacillus	1.32463	1.04373	2.85634	QIAamp	1.74157	0
D_0__Bacteria;D_1__Firmicutes;D_2__Clostridia;D_3__Clostridiales;D_4__Clostridiales vadinBB60 group;D_5__uncultured bacterium	-0.0317089	-1.10579	0.146078	MEM	-0.330475	0
D_0__Bacteria;D_1__Firmicutes;D_2__Clostridia;D_3__Clostridiales;D_4__Clostridiales vadinBB60 group;D_5__uncultured bacterium	-3.19598	-4.30178	-5.60316	MolYsis	-4.36697	3
D_0__Bacteria;D_1__Firmicutes;D_2__Clostridia;D_3__Clostridiales;D_4__Clostridiales vadinBB60 group;D_5__uncultured bacterium	-3.19598	-4.30178	-5.34577	MolYsis+PK	-4.28118	2
D_0__Bacteria;D_1__Firmicutes;D_2__Clostridia;D_3__Clostridiales;D_4__Clostridiales vadinBB60 group;D_5__uncultured bacterium	0.476438	-0.289507	0.979156	PMA	0.388696	0
D_0__Bacteria;D_1__Firmicutes;D_2__Clostridia;D_3__Clostridiales;D_4__Clostridiales vadinBB60 group;D_5__uncultured bacterium	-3.19598	-4.30178	-5.60316	QIAamp	-4.36697	3
D_0__Bacteria;D_1__Firmicutes;D_2__Clostridia;D_3__Clostridiales;D_4__Lachnospiraceae;D_5__A2	-0.015854	-0.961526	0.0225622	MEM	-0.318273	0
D_0__Bacteria;D_1__Firmicutes;D_2__Clostridia;D_3__Clostridiales;D_4__Lachnospiraceae;D_5__A2	0.598042	1.54543	2.38665	MolYsis	1.51004	0
D_0__Bacteria;D_1__Firmicutes;D_2__Clostridia;D_3__Clostridiales;D_4__Lachnospiraceae;D_5__A2	2.53415	2.35279	2.2128	MolYsis+PK	2.36658	0
D_0__Bacteria;D_1__Firmicutes;D_2__Clostridia;D_3__Clostridiales;D_4__Lachnospiraceae;D_5__A2	-2.81526	-0.255257	0.55518	PMA	-0.838446	0
D_0__Bacteria;D_1__Firmicutes;D_2__Clostridia;D_3__Clostridiales;D_4__Lachnospiraceae;D_5__A2	-3.34577	-2.88187	-0.392475	QIAamp	-2.20671	1
D_0__Bacteria;D_1__Firmicutes;D_2__Clostridia;D_3__Clostridiales;D_4__Lachnospiraceae;D_5__ASF356	-2.95782	0.847997	-1.16993	MEM	-1.09325	1
D_0__Bacteria;D_1__Firmicutes;D_2__Clostridia;D_3__Clostridiales;D_4__Lachnospiraceae;D_5__ASF356	-2.95782	-0.321928	-4.30178	MolYsis	-2.52717	2
D_0__Bacteria;D_1__Firmicutes;D_2__Clostridia;D_3__Clostridiales;D_4__Lachnospiraceae;D_5__ASF356	-2.95782	-0.206451	-2.30743	MolYsis+PK	-1.8239	1
D_0__Bacteria;D_1__Firmicutes;D_2__Clostridia;D_3__Clostridiales;D_4__Lachnospiraceae;D_5__ASF356	-2.95782	3.27302	-4.30178	PMA	-1.32886	2
D_0__Bacteria;D_1__Firmicutes;D_2__Clostridia;D_3__Clostridiales;D_4__Lachnospiraceae;D_5__ASF356	-2.95782	-1.57931	-4.30178	QIAamp	-2.9463	3
D_0__Bacteria;D_1__Firmicutes;D_2__Clostridia;D_3__Clostridiales;D_4__Lachnospiraceae;D_5__Dorea	-0.257381	-2.5304	0.579157	MEM	-0.736208	2
D_0__Bacteria;D_1__Firmicutes;D_2__Clostridia;D_3__Clostridiales;D_4__Lachnospiraceae;D_5__Dorea	0.874469	1.07276	1.3254	MolYsis	1.09088	0
D_0__Bacteria;D_1__Firmicutes;D_2__Clostridia;D_3__Clostridiales;D_4__Lachnospiraceae;D_5__Dorea	-0.257381	1.31194	0.613645	MolYsis+PK	0.556069	1
D_0__Bacteria;D_1__Firmicutes;D_2__Clostridia;D_3__Clostridiales;D_4__Lachnospiraceae;D_5__Dorea	1.11548	-0.157541	0.937844	PMA	0.631926	0
D_0__Bacteria;D_1__Firmicutes;D_2__Clostridia;D_3__Clostridiales;D_4__Lachnospiraceae;D_5__Dorea	-0.257381	-2.5304	-2.79008	QIAamp	-1.85929	2
D_0__Bacteria;D_1__Firmicutes;D_2__Clostridia;D_3__Clostridiales;D_4__Lachnospiraceae;D_5__GCA-900066575	-2.84234	-3.42626	-1.64909	MEM	-2.63923	1
D_0__Bacteria;D_1__Firmicutes;D_2__Clostridia;D_3__Clostridiales;D_4__Lachnospiraceae;D_5__GCA-900066575	0.784271	1.22479	0.430634	MolYsis	0.813231	0
D_0__Bacteria;D_1__Firmicutes;D_2__Clostridia;D_3__Clostridiales;D_4__Lachnospiraceae;D_5__GCA-900066575	-2.84234	-3.25634	-2.7866	MolYsis+PK	-2.96176	1
D_0__Bacteria;D_1__Firmicutes;D_2__Clostridia;D_3__Clostridiales;D_4__Lachnospiraceae;D_5__GCA-900066575	0.321928	-0.216811	-0.493815	PMA	-0.129566	0
D_0__Bacteria;D_1__Firmicutes;D_2__Clostridia;D_3__Clostridiales;D_4__Lachnospiraceae;D_5__GCA-900066575	-2.84234	-4.09868	-3.78094	QIAamp	-3.57399	3
D_0__Bacteria;D_1__Firmicutes;D_2__Clostridia;D_3__Clostridiales;D_4__Lachnospiraceae;D_5__Lachnoclostridium	0.332575	-0.646363	0.0984037	MEM	-0.0717947	0
D_0__Bacteria;D_1__Firmicutes;D_2__Clostridia;D_3__Clostridiales;D_4__Lachnospiraceae;D_5__Lachnoclostridium	1.05247	0.949016	1.27711	MolYsis	1.09286	0
D_0__Bacteria;D_1__Firmicutes;D_2__Clostridia;D_3__Clostridiales;D_4__Lachnospiraceae;D_5__Lachnoclostridium	1	1.60486	0.921526	MolYsis+PK	1.17546	0
D_0__Bacteria;D_1__Firmicutes;D_2__Clostridia;D_3__Clostridiales;D_4__Lachnospiraceae;D_5__Lachnoclostridium	-0.231326	-0.678072	0.31853	PMA	-0.196956	0
D_0__Bacteria;D_1__Firmicutes;D_2__Clostridia;D_3__Clostridiales;D_4__Lachnospiraceae;D_5__Lachnoclostridium	-2.42731	-2.848	-1.5025	QIAamp	-2.25927	1
D_0__Bacteria;D_1__Firmicutes;D_2__Clostridia;D_3__Clostridiales;D_4__Lachnospiraceae;D_5__Lachnospiraceae FCS020 group	-0.584963	-1.57931	-0.280108	MEM	-0.814793	1
D_0__Bacteria;D_1__Firmicutes;D_2__Clostridia;D_3__Clostridiales;D_4__Lachnospiraceae;D_5__Lachnospiraceae FCS020 group	0	0.552541	0.0280144	MolYsis	0.193518	0
D_0__Bacteria;D_1__Firmicutes;D_2__Clostridia;D_3__Clostridiales;D_4__Lachnospiraceae;D_5__Lachnospiraceae FCS020 group	-0.584963	0.552541	0.371969	MolYsis+PK	0.113182	0
D_0__Bacteria;D_1__Firmicutes;D_2__Clostridia;D_3__Clostridiales;D_4__Lachnospiraceae;D_5__Lachnospiraceae FCS020 group	-0.584963	-1.57931	-1.3505	PMA	-1.17159	1
D_0__Bacteria;D_1__Firmicutes;D_2__Clostridia;D_3__Clostridiales;D_4__Lachnospiraceae;D_5__Lachnospiraceae FCS020 group	-0.842344	-1.57931	-2.3505	QIAamp	-1.59072	2
D_0__Bacteria;D_1__Firmicutes;D_2__Clostridia;D_3__Clostridiales;D_4__Lachnospiraceae;D_5__Lachnospiraceae NK4A136 group	-4.25802	-2.75364	-1.28639	MEM	-2.76602	0
D_0__Bacteria;D_1__Firmicutes;D_2__Clostridia;D_3__Clostridiales;D_4__Lachnospiraceae;D_5__Lachnospiraceae NK4A136 group	-1.7137	0.972376	-0.473541	MolYsis	-0.404954	0
D_0__Bacteria;D_1__Firmicutes;D_2__Clostridia;D_3__Clostridiales;D_4__Lachnospiraceae;D_5__Lachnospiraceae NK4A136 group	-4.12051	-1.08188	-0.831246	MolYsis+PK	-2.01121	0
D_0__Bacteria;D_1__Firmicutes;D_2__Clostridia;D_3__Clostridiales;D_4__Lachnospiraceae;D_5__Lachnospiraceae NK4A136 group	-2.5502	0.578314	-2.60618	PMA	-1.52602	0
D_0__Bacteria;D_1__Firmicutes;D_2__Clostridia;D_3__Clostridiales;D_4__Lachnospiraceae;D_5__Lachnospiraceae NK4A136 group	-6.83733	-1.67211	-7.35541	QIAamp	-5.28828	2
D_0__Bacteria;D_1__Firmicutes;D_2__Clostridia;D_3__Clostridiales;D_4__Lachnospiraceae;D_5__Lachnospiraceae UCG-001	-2.45943	-1.63288	-1.22441	MEM	-1.77224	0
D_0__Bacteria;D_1__Firmicutes;D_2__Clostridia;D_3__Clostridiales;D_4__Lachnospiraceae;D_5__Lachnospiraceae UCG-001	-5.65541	-2.05004	-3.99398	MolYsis	-3.89981	1
D_0__Bacteria;D_1__Firmicutes;D_2__Clostridia;D_3__Clostridiales;D_4__Lachnospiraceae;D_5__Lachnospiraceae UCG-001	-4.0761	0.460921	-0.213366	MolYsis+PK	-1.27618	0
D_0__Bacteria;D_1__Firmicutes;D_2__Clostridia;D_3__Clostridiales;D_4__Lachnospiraceae;D_5__Lachnospiraceae UCG-001	-0.548365	1.03042	-1.1139	PMA	-0.210615	0
D_0__Bacteria;D_1__Firmicutes;D_2__Clostridia;D_3__Clostridiales;D_4__Lachnospiraceae;D_5__Lachnospiraceae UCG-001	-5.65541	-7.13185	-7.90087	QIAamp	-6.89604	2
D_0__Bacteria;D_1__Firmicutes;D_2__Clostridia;D_3__Clostridiales;D_4__Lachnospiraceae;D_5__Marvinbryantia	-0.436099	-1.56726	-0.158698	MEM	-0.720686	0
D_0__Bacteria;D_1__Firmicutes;D_2__Clostridia;D_3__Clostridiales;D_4__Lachnospiraceae;D_5__Marvinbryantia	0.626185	0.017702	1.38082	MolYsis	0.674903	0
D_0__Bacteria;D_1__Firmicutes;D_2__Clostridia;D_3__Clostridiales;D_4__Lachnospiraceae;D_5__Marvinbryantia	2.10579	0.629776	1.27302	MolYsis+PK	1.3362	0
D_0__Bacteria;D_1__Firmicutes;D_2__Clostridia;D_3__Clostridiales;D_4__Lachnospiraceae;D_5__Marvinbryantia	0.705257	-1.62103	1.59495	PMA	0.226391	0
D_0__Bacteria;D_1__Firmicutes;D_2__Clostridia;D_3__Clostridiales;D_4__Lachnospiraceae;D_5__Marvinbryantia	-1.4361	-5.11746	-2.77761	QIAamp	-3.11039	0
D_0__Bacteria;D_1__Firmicutes;D_2__Clostridia;D_3__Clostridiales;D_4__Lachnospiraceae;D_5__Roseburia	-1.25206	-2.47558	-1.35408	MEM	-1.69391	0
D_0__Bacteria;D_1__Firmicutes;D_2__Clostridia;D_3__Clostridiales;D_4__Lachnospiraceae;D_5__Roseburia	-1.90414	0.576704	1.07549	MolYsis	-0.0839818	0
D_0__Bacteria;D_1__Firmicutes;D_2__Clostridia;D_3__Clostridiales;D_4__Lachnospiraceae;D_5__Roseburia	1.66354	-0.273945	-0.972444	MolYsis+PK	0.139052	0
D_0__Bacteria;D_1__Firmicutes;D_2__Clostridia;D_3__Clostridiales;D_4__Lachnospiraceae;D_5__Roseburia	-1.90414	-0.360102	0.945323	PMA	-0.43964	0
D_0__Bacteria;D_1__Firmicutes;D_2__Clostridia;D_3__Clostridiales;D_4__Lachnospiraceae;D_5__Roseburia	-4.70584	-5.60486	-5.1819	QIAamp	-5.1642	1
D_0__Bacteria;D_1__Firmicutes;D_2__Clostridia;D_3__Clostridiales;D_4__Lachnospiraceae;D_5__uncultured	-1.04252	-0.628031	-0.258772	MEM	-0.643109	0
D_0__Bacteria;D_1__Firmicutes;D_2__Clostridia;D_3__Clostridiales;D_4__Lachnospiraceae;D_5__uncultured	-0.546567	0.803308	0.375554	MolYsis	0.210765	0
D_0__Bacteria;D_1__Firmicutes;D_2__Clostridia;D_3__Clostridiales;D_4__Lachnospiraceae;D_5__uncultured	-0.836074	0.82143	-0.02584	MolYsis+PK	-0.0134945	0
D_0__Bacteria;D_1__Firmicutes;D_2__Clostridia;D_3__Clostridiales;D_4__Lachnospiraceae;D_5__uncultured	-1.80436	0.333199	-0.672959	PMA	-0.714708	0
D_0__Bacteria;D_1__Firmicutes;D_2__Clostridia;D_3__Clostridiales;D_4__Lachnospiraceae;D_5__uncultured	-2.66496	-1.72991	-1.36196	QIAamp	-1.91894	0
D_0__Bacteria;D_1__Firmicutes;D_2__Clostridia;D_3__Clostridiales;D_4__Lachnospiraceae;__	-0.868549	-0.888639	-0.242032	MEM	-0.666407	0
D_0__Bacteria;D_1__Firmicutes;D_2__Clostridia;D_3__Clostridiales;D_4__Lachnospiraceae;__	-0.804984	1.36405	0.308815	MolYsis	0.289295	0
D_0__Bacteria;D_1__Firmicutes;D_2__Clostridia;D_3__Clostridiales;D_4__Lachnospiraceae;__	-0.948719	0.547371	0.439862	MolYsis+PK	0.0128376	0
D_0__Bacteria;D_1__Firmicutes;D_2__Clostridia;D_3__Clostridiales;D_4__Lachnospiraceae;__	-0.633218	0.416706	-0.139305	PMA	-0.118606	0
D_0__Bacteria;D_1__Firmicutes;D_2__Clostridia;D_3__Clostridiales;D_4__Lachnospiraceae;__	-3.89038	-2.45721	-2.99326	QIAamp	-3.11362	0
D_0__Bacteria;D_1__Firmicutes;D_2__Clostridia;D_3__Clostridiales;D_4__Peptococcaceae;D_5__uncultured	-1.37286	-0.0931094	-2.42731	MEM	-1.29776	2
D_0__Bacteria;D_1__Firmicutes;D_2__Clostridia;D_3__Clostridiales;D_4__Peptococcaceae;D_5__uncultured	-1.37286	0.954196	-1.75489	MolYsis	-0.724517	1
D_0__Bacteria;D_1__Firmicutes;D_2__Clostridia;D_3__Clostridiales;D_4__Peptococcaceae;D_5__uncultured	-1.37286	1.20945	-2.42731	MolYsis+PK	-0.863571	2
D_0__Bacteria;D_1__Firmicutes;D_2__Clostridia;D_3__Clostridiales;D_4__Peptococcaceae;D_5__uncultured	-1.37286	1.08746	-0.295456	PMA	-0.193617	1
D_0__Bacteria;D_1__Firmicutes;D_2__Clostridia;D_3__Clostridiales;D_4__Peptococcaceae;D_5__uncultured	-1.37286	-0.192645	-0.584963	QIAamp	-0.716822	1
D_0__Bacteria;D_1__Firmicutes;D_2__Clostridia;D_3__Clostridiales;D_4__Ruminococcaceae;D_5__Anaerotruncus	-2.88187	-3.25738	-0.0544478	MEM	-2.06457	2
D_0__Bacteria;D_1__Firmicutes;D_2__Clostridia;D_3__Clostridiales;D_4__Ruminococcaceae;D_5__Anaerotruncus	-2.62449	-0.941106	-2.94753	MolYsis	-2.17104	0
D_0__Bacteria;D_1__Firmicutes;D_2__Clostridia;D_3__Clostridiales;D_4__Ruminococcaceae;D_5__Anaerotruncus	-2.88187	-1.4975	-1.29546	MolYsis+PK	-1.89161	1
D_0__Bacteria;D_1__Firmicutes;D_2__Clostridia;D_3__Clostridiales;D_4__Ruminococcaceae;D_5__Anaerotruncus	-1.03953	-0.22741	0.152003	PMA	-0.371645	0
D_0__Bacteria;D_1__Firmicutes;D_2__Clostridia;D_3__Clostridiales;D_4__Ruminococcaceae;D_5__Anaerotruncus	-1.88753	-0.455679	-0.432959	QIAamp	-0.925388	0
D_0__Bacteria;D_1__Firmicutes;D_2__Clostridia;D_3__Clostridiales;D_4__Ruminococcaceae;D_5__Butyricicoccus	0.0995357	0.206451	-0.549085	MEM	-0.081033	0
D_0__Bacteria;D_1__Firmicutes;D_2__Clostridia;D_3__Clostridiales;D_4__Ruminococcaceae;D_5__Butyricicoccus	-2.22239	0.971986	-2.72662	MolYsis	-1.32568	0
D_0__Bacteria;D_1__Firmicutes;D_2__Clostridia;D_3__Clostridiales;D_4__Ruminococcaceae;D_5__Butyricicoccus	0.514573	2.80735	0.356792	MolYsis+PK	1.22624	0
D_0__Bacteria;D_1__Firmicutes;D_2__Clostridia;D_3__Clostridiales;D_4__Ruminococcaceae;D_5__Butyricicoccus	-2.58496	2.05445	-1.90949	PMA	-0.813334	0
D_0__Bacteria;D_1__Firmicutes;D_2__Clostridia;D_3__Clostridiales;D_4__Ruminococcaceae;D_5__Butyricicoccus	-3.06474	-2.37286	-2.36405	QIAamp	-2.60055	2
D_0__Bacteria;D_1__Firmicutes;D_2__Clostridia;D_3__Clostridiales;D_4__Ruminococcaceae;D_5__Oscillibacter	-0.485427	0.357552	0.275061	MEM	0.0490622	0
D_0__Bacteria;D_1__Firmicutes;D_2__Clostridia;D_3__Clostridiales;D_4__Ruminococcaceae;D_5__Oscillibacter	-2.39232	1.26679	-0.708698	MolYsis	-0.61141	0
D_0__Bacteria;D_1__Firmicutes;D_2__Clostridia;D_3__Clostridiales;D_4__Ruminococcaceae;D_5__Oscillibacter	0.736966	2.91289	0.886991	MolYsis+PK	1.51228	0
D_0__Bacteria;D_1__Firmicutes;D_2__Clostridia;D_3__Clostridiales;D_4__Ruminococcaceae;D_5__Oscillibacter	-2.22239	2.02237	-1.28293	PMA	-0.49432	0
D_0__Bacteria;D_1__Firmicutes;D_2__Clostridia;D_3__Clostridiales;D_4__Ruminococcaceae;D_5__Oscillibacter	-2.80735	-1.41504	-1.17487	QIAamp	-1.79909	0
D_0__Bacteria;D_1__Firmicutes;D_2__Clostridia;D_3__Clostridiales;D_4__Ruminococcaceae;D_5__Ruminiclostridium 5	0.115477	-1.34577	-0.731511	MEM	-0.653936	0
D_0__Bacteria;D_1__Firmicutes;D_2__Clostridia;D_3__Clostridiales;D_4__Ruminococcaceae;D_5__Ruminiclostridium 5	0.369234	0.755763	0.423211	MolYsis	0.516069	0
D_0__Bacteria;D_1__Firmicutes;D_2__Clostridia;D_3__Clostridiales;D_4__Ruminococcaceae;D_5__Ruminiclostridium 5	0.938599	0.177787	-0.576789	MolYsis+PK	0.179866	0
D_0__Bacteria;D_1__Firmicutes;D_2__Clostridia;D_3__Clostridiales;D_4__Ruminococcaceae;D_5__Ruminiclostridium 5	-0.263034	-0.407175	-0.289507	PMA	-0.319905	0
D_0__Bacteria;D_1__Firmicutes;D_2__Clostridia;D_3__Clostridiales;D_4__Ruminococcaceae;D_5__Ruminiclostridium 5	-2.25738	-3.60316	-4.13185	QIAamp	-3.3308	3
D_0__Bacteria;D_1__Bacteroidetes;D_2__Bacteroidia;D_3__Bacteroidales;D_4__Bacteroidaceae;D_5__Bacteroides	-0.180992	0.0715533	0.133954	MEM	0.0081718	0
D_0__Bacteria;D_1__Bacteroidetes;D_2__Bacteroidia;D_3__Bacteroidales;D_4__Bacteroidaceae;D_5__Bacteroides	-3.25424	-1.0447	-2.00782	MolYsis	-2.10225	0
D_0__Bacteria;D_1__Bacteroidetes;D_2__Bacteroidia;D_3__Bacteroidales;D_4__Bacteroidaceae;D_5__Bacteroides	-2.13876	-1.50413	-1.83094	MolYsis+PK	-1.82461	0
D_0__Bacteria;D_1__Bacteroidetes;D_2__Bacteroidia;D_3__Bacteroidales;D_4__Bacteroidaceae;D_5__Bacteroides	-0.159724	-0.0446998	-0.39183	PMA	-0.198751	0
D_0__Bacteria;D_1__Bacteroidetes;D_2__Bacteroidia;D_3__Bacteroidales;D_4__Bacteroidaceae;D_5__Bacteroides	-0.159724	-0.165652	0.462972	QIAamp	0.0458654	0
D_0__Bacteria;D_1__Firmicutes;D_2__Clostridia;D_3__Clostridiales;D_4__Ruminococcaceae;D_5__Ruminiclostridium 9	-0.0857299	2.39486	0.695994	MEM	1.00171	0
D_0__Bacteria;D_1__Firmicutes;D_2__Clostridia;D_3__Clostridiales;D_4__Ruminococcaceae;D_5__Ruminiclostridium 9	-3.37286	1.72085	-0.810966	MolYsis	-0.820993	1
D_0__Bacteria;D_1__Firmicutes;D_2__Clostridia;D_3__Clostridiales;D_4__Ruminococcaceae;D_5__Ruminiclostridium 9	0.408085	3.89616	0.835924	MolYsis+PK	1.71339	0
D_0__Bacteria;D_1__Firmicutes;D_2__Clostridia;D_3__Clostridiales;D_4__Ruminococcaceae;D_5__Ruminiclostridium 9	-3.37286	2.47393	-1.71312	PMA	-0.870682	1
D_0__Bacteria;D_1__Firmicutes;D_2__Clostridia;D_3__Clostridiales;D_4__Ruminococcaceae;D_5__Ruminiclostridium 9	-1.79355	-2.42731	-1.4344	QIAamp	-1.88509	1
D_0__Bacteria;D_1__Firmicutes;D_2__Clostridia;D_3__Clostridiales;D_4__Ruminococcaceae;D_5__Ruminiclostridium	0.304855	-0.53842	-0.239827	MEM	-0.157797	0
D_0__Bacteria;D_1__Firmicutes;D_2__Clostridia;D_3__Clostridiales;D_4__Ruminococcaceae;D_5__Ruminiclostridium	-1.28011	0.363883	0.153951	MolYsis	-0.254091	0
D_0__Bacteria;D_1__Firmicutes;D_2__Clostridia;D_3__Clostridiales;D_4__Ruminococcaceae;D_5__Ruminiclostridium	1.84327	2.02055	1.18858	MolYsis+PK	1.68413	0
D_0__Bacteria;D_1__Firmicutes;D_2__Clostridia;D_3__Clostridiales;D_4__Ruminococcaceae;D_5__Ruminiclostridium	1.27009	0.0804899	0.38051	PMA	0.57703	0
D_0__Bacteria;D_1__Firmicutes;D_2__Clostridia;D_3__Clostridiales;D_4__Ruminococcaceae;D_5__Ruminiclostridium	-1.75988	-4.60316	-5.46683	QIAamp	-3.94329	3
D_0__Bacteria;D_1__Bacteroidetes;D_2__Bacteroidia;D_3__Bacteroidales;D_4__Marinifilaceae;D_5__Odoribacter	0.834941	-0.641952	-0.246794	MEM	-0.0179352	0
D_0__Bacteria;D_1__Bacteroidetes;D_2__Bacteroidia;D_3__Bacteroidales;D_4__Marinifilaceae;D_5__Odoribacter	-2.88187	-4.82217	-4.9853	MolYsis	-4.22978	3
D_0__Bacteria;D_1__Bacteroidetes;D_2__Bacteroidia;D_3__Bacteroidales;D_4__Marinifilaceae;D_5__Odoribacter	-2.88187	-4.82217	-4.50553	MolYsis+PK	-4.06986	2
D_0__Bacteria;D_1__Bacteroidetes;D_2__Bacteroidia;D_3__Bacteroidales;D_4__Marinifilaceae;D_5__Odoribacter	1.31411	-0.827819	0.408216	PMA	0.298169	0
D_0__Bacteria;D_1__Bacteroidetes;D_2__Bacteroidia;D_3__Bacteroidales;D_4__Marinifilaceae;D_5__Odoribacter	0.182864	-2.90182	-0.132974	QIAamp	-0.950643	0
D_0__Bacteria;D_1__Firmicutes;D_2__Clostridia;D_3__Clostridiales;D_4__Ruminococcaceae;D_5__uncultured	0.415037	0.426265	-0.40439	MEM	0.145637	0
D_0__Bacteria;D_1__Firmicutes;D_2__Clostridia;D_3__Clostridiales;D_4__Ruminococcaceae;D_5__uncultured	-0.584963	0.930737	-0.0824622	MolYsis	0.0877709	0
D_0__Bacteria;D_1__Firmicutes;D_2__Clostridia;D_3__Clostridiales;D_4__Ruminococcaceae;D_5__uncultured	1.9386	2.29462	1.06274	MolYsis+PK	1.76532	0
D_0__Bacteria;D_1__Firmicutes;D_2__Clostridia;D_3__Clostridiales;D_4__Ruminococcaceae;D_5__uncultured	0.5025	0.285402	-1.03242	PMA	-0.0815063	0
D_0__Bacteria;D_1__Firmicutes;D_2__Clostridia;D_3__Clostridiales;D_4__Ruminococcaceae;D_5__uncultured	-1.25738	-2.67242	-4.16427	QIAamp	-2.69802	3
D_0__Bacteria;D_1__Firmicutes;D_2__Clostridia;D_3__Clostridiales;D_4__Ruminococcaceae;__	-0.237039	0.0919225	0.0230836	MEM	-0.0406777	0
D_0__Bacteria;D_1__Firmicutes;D_2__Clostridia;D_3__Clostridiales;D_4__Ruminococcaceae;__	-2.71681	-0.247928	-1.21723	MolYsis	-1.39399	1
D_0__Bacteria;D_1__Firmicutes;D_2__Clostridia;D_3__Clostridiales;D_4__Ruminococcaceae;__	-1.23704	1.074	0.0230836	MolYsis+PK	-0.0466517	0
D_0__Bacteria;D_1__Firmicutes;D_2__Clostridia;D_3__Clostridiales;D_4__Ruminococcaceae;__	-0.874469	1.08299	-0.824913	PMA	-0.205464	0
D_0__Bacteria;D_1__Firmicutes;D_2__Clostridia;D_3__Clostridiales;D_4__Ruminococcaceae;__	-2.71681	-1.54749	-1.60842	QIAamp	-1.95757	1
D_0__Bacteria;D_1__Firmicutes;D_2__Erysipelotrichia;D_3__Erysipelotrichales;D_4__Erysipelotrichaceae;D_5__Dubosiella	0.34368	-0.321928	0.683526	MEM	0.235093	0
D_0__Bacteria;D_1__Firmicutes;D_2__Erysipelotrichia;D_3__Erysipelotrichales;D_4__Erysipelotrichaceae;D_5__Dubosiella	1.11052	-0.198546	1.22239	MolYsis	0.711455	0
D_0__Bacteria;D_1__Firmicutes;D_2__Erysipelotrichia;D_3__Erysipelotrichales;D_4__Erysipelotrichaceae;D_5__Dubosiella	0.45934	-0.544321	0.0848889	MolYsis+PK	-3.05e-05	0
D_0__Bacteria;D_1__Firmicutes;D_2__Erysipelotrichia;D_3__Erysipelotrichales;D_4__Erysipelotrichaceae;D_5__Dubosiella	0.379671	-1.3744	0.762961	PMA	-0.0772545	0
D_0__Bacteria;D_1__Firmicutes;D_2__Erysipelotrichia;D_3__Erysipelotrichales;D_4__Erysipelotrichaceae;D_5__Dubosiella	1.11772	0.0995357	2.06413	QIAamp	1.09379	0
D_0__Bacteria;D_1__Firmicutes;D_2__Erysipelotrichia;D_3__Erysipelotrichales;D_4__Erysipelotrichaceae;D_5__Turicibacter	0.389452	-0.630843	0.402857	MEM	0.0538222	0
D_0__Bacteria;D_1__Firmicutes;D_2__Erysipelotrichia;D_3__Erysipelotrichales;D_4__Erysipelotrichaceae;D_5__Turicibacter	1.00047	-0.0409816	1.04029	MolYsis	0.666592	0
D_0__Bacteria;D_1__Firmicutes;D_2__Erysipelotrichia;D_3__Erysipelotrichales;D_4__Erysipelotrichaceae;D_5__Turicibacter	1.31137	0.293606	0.892692	MolYsis+PK	0.832556	0
D_0__Bacteria;D_1__Firmicutes;D_2__Erysipelotrichia;D_3__Erysipelotrichales;D_4__Erysipelotrichaceae;D_5__Turicibacter	0.847579	-1.20116	0.813543	PMA	0.153321	0
D_0__Bacteria;D_1__Firmicutes;D_2__Erysipelotrichia;D_3__Erysipelotrichales;D_4__Erysipelotrichaceae;D_5__Turicibacter	1.05076	1.0224	1.88234	QIAamp	1.3185	0
D_0__Bacteria;D_1__Proteobacteria;D_2__Deltaproteobacteria;D_3__Desulfovibrionales;D_4__Desulfovibrionaceae;D_5__uncultured	0.468387	1.47551	0.498989	MEM	0.814296	0
D_0__Bacteria;D_1__Proteobacteria;D_2__Deltaproteobacteria;D_3__Desulfovibrionales;D_4__Desulfovibrionaceae;D_5__uncultured	-2.57511	1.27778	-0.111508	MolYsis	-0.469614	0
D_0__Bacteria;D_1__Proteobacteria;D_2__Deltaproteobacteria;D_3__Desulfovibrionales;D_4__Desulfovibrionaceae;D_5__uncultured	-1.30718	1.23644	-0.246438	MolYsis+PK	-0.105726	0
D_0__Bacteria;D_1__Proteobacteria;D_2__Deltaproteobacteria;D_3__Desulfovibrionales;D_4__Desulfovibrionaceae;D_5__uncultured	-0.14543	1.01963	-0.748938	PMA	0.0417534	0
D_0__Bacteria;D_1__Proteobacteria;D_2__Deltaproteobacteria;D_3__Desulfovibrionales;D_4__Desulfovibrionaceae;D_5__uncultured	-0.531613	1.15003	0.125531	QIAamp	0.247981	0
D_0__Bacteria;D_1__Proteobacteria;D_2__Gammaproteobacteria;D_3__Betaproteobacteriales;D_4__Burkholderiaceae;D_5__Parasutterella	0.232173	0.29956	1.29546	MEM	0.609063	0
D_0__Bacteria;D_1__Proteobacteria;D_2__Gammaproteobacteria;D_3__Betaproteobacteriales;D_4__Burkholderiaceae;D_5__Parasutterella	-0.119299	0.621488	1.54057	MolYsis	0.680919	0
D_0__Bacteria;D_1__Proteobacteria;D_2__Gammaproteobacteria;D_3__Betaproteobacteriales;D_4__Burkholderiaceae;D_5__Parasutterella	0.929611	1.20645	0.347923	MolYsis+PK	0.827995	0
D_0__Bacteria;D_1__Proteobacteria;D_2__Gammaproteobacteria;D_3__Betaproteobacteriales;D_4__Burkholderiaceae;D_5__Parasutterella	-0.19592	0.106915	0.540568	PMA	0.150521	0
D_0__Bacteria;D_1__Proteobacteria;D_2__Gammaproteobacteria;D_3__Betaproteobacteriales;D_4__Burkholderiaceae;D_5__Parasutterella	-0.60224	0.206451	1.89812	QIAamp	0.500777	0
D_0__Bacteria;D_1__Bacteroidetes;D_2__Bacteroidia;D_3__Bacteroidales;D_4__Muribaculaceae;D_5__Muribaculum	0.507484	0.433897	0.610053	MEM	0.517145	0
D_0__Bacteria;D_1__Bacteroidetes;D_2__Bacteroidia;D_3__Bacteroidales;D_4__Muribaculaceae;D_5__Muribaculum	-0.0577155	0.706269	0.415037	MolYsis	0.35453	0
D_0__Bacteria;D_1__Bacteroidetes;D_2__Bacteroidia;D_3__Bacteroidales;D_4__Muribaculaceae;D_5__Muribaculum	-0.944505	-0.662965	-1.51096	MolYsis+PK	-1.03948	0
D_0__Bacteria;D_1__Bacteroidetes;D_2__Bacteroidia;D_3__Bacteroidales;D_4__Muribaculaceae;D_5__Muribaculum	0.0824622	-0.0255351	-0.406625	PMA	-0.116566	0
D_0__Bacteria;D_1__Bacteroidetes;D_2__Bacteroidia;D_3__Bacteroidales;D_4__Muribaculaceae;D_5__Muribaculum	0.197939	-0.788496	-0.547488	QIAamp	-0.379348	0
D_0__Bacteria;D_1__Bacteroidetes;D_2__Bacteroidia;D_3__Bacteroidales;D_4__Muribaculaceae;D_5__uncultured Bacteroidales bacterium	0.385025	0.499795	0.4842	MEM	0.45634	0
D_0__Bacteria;D_1__Bacteroidetes;D_2__Bacteroidia;D_3__Bacteroidales;D_4__Muribaculaceae;D_5__uncultured Bacteroidales bacterium	-0.736966	0.473564	0.308122	MolYsis	0.0149068	0
D_0__Bacteria;D_1__Bacteroidetes;D_2__Bacteroidia;D_3__Bacteroidales;D_4__Muribaculaceae;D_5__uncultured Bacteroidales bacterium	-0.437847	0.15659	-1.20249	MolYsis+PK	-0.494583	0
D_0__Bacteria;D_1__Bacteroidetes;D_2__Bacteroidia;D_3__Bacteroidales;D_4__Muribaculaceae;D_5__uncultured Bacteroidales bacterium	0	-0.155069	-0.624133	PMA	-0.259734	0
D_0__Bacteria;D_1__Bacteroidetes;D_2__Bacteroidia;D_3__Bacteroidales;D_4__Muribaculaceae;D_5__uncultured Bacteroidales bacterium	-0.306103	-0.17568	0.395585	QIAamp	-0.0287326	0

## Sheet: Table_S2
clade_name	Control_avg	MEM_avg	Control_std	MEM_std	Control_CV	MEM_CV
k__Bacteria|p__Actinobacteria|c__Actinobacteria|o__Bifidobacteriales|f__Bifidobacteriaceae|g__Bifidobacterium|s__Bifidobacterium_pseudolongum	0.856263	1.13888	1.48309	1.9726	173.205	173.205
k__Bacteria|p__Actinobacteria|c__Coriobacteriia|o__Eggerthellales|f__Eggerthellaceae|g__Enterorhabdus|s__Enterorhabdus_caecimuris	0.5074	0.582043	0.225349	0.256034	44.4124	43.9889
k__Bacteria|p__Bacteroidetes|c__Bacteroidia|o__Bacteroidales|f__Bacteroidaceae|g__Bacteroides|s__Bacteroides_caecimuris	1.61696	2.48954	0.0916627	0.549335	5.66884	22.0657
k__Bacteria|p__Bacteroidetes|c__Bacteroidia|o__Bacteroidales|f__Bacteroidaceae|g__Bacteroides|s__Bacteroides_sartorii	1.9787	2.36881	0.425897	0.91943	21.524	38.8139
k__Bacteria|p__Bacteroidetes|c__Bacteroidia|o__Bacteroidales|f__Bacteroidaceae|g__Bacteroides|s__Bacteroides_uniformis	0.42265	0.554667	0.337681	0.543196	79.8962	97.932
k__Bacteria|p__Bacteroidetes|c__Bacteroidia|o__Bacteroidales|f__Bacteroidaceae|g__Bacteroides|s__Bacteroides_vulgatus	0.0369933	0.0435433	0.0106219	0.0231385	28.7129	53.139
k__Bacteria|p__Bacteroidetes|c__Bacteroidia|o__Bacteroidales|f__Muribaculaceae|g__Muribaculaceae_unclassified|s__Muribaculaceae_bacterium_DSM_103720	13.7292	22.6106	3.82047	2.96865	27.8273	13.1295
k__Bacteria|p__Bacteroidetes|c__Bacteroidia|o__Bacteroidales|f__Muribaculaceae|g__Muribaculum|s__Muribaculum_intestinale	10.5339	16.8543	3.85305	2.34906	36.5776	13.9374
k__Bacteria|p__Bacteroidetes|c__Bacteroidia|o__Bacteroidales|f__Tannerellaceae|g__Parabacteroides|s__Parabacteroides_distasonis	0.958803	1.28483	0.455969	0.792124	47.5561	61.6521
k__Bacteria|p__Deferribacteres|c__Deferribacteres|o__Deferribacterales|f__Deferribacteraceae|g__Mucispirillum|s__Mucispirillum_schaedleri	0.68879	0.942193	0.368997	0.732229	53.5717	77.7154
k__Bacteria|p__Firmicutes|c__Bacilli|o__Lactobacillales|f__Lactobacillaceae|g__Lactobacillus|s__Lactobacillus_intestinalis	0.86972	0.96793	0.337942	0.677953	38.8564	70.0415
k__Bacteria|p__Firmicutes|c__Bacilli|o__Lactobacillales|f__Lactobacillaceae|g__Lactobacillus|s__Lactobacillus_johnsonii	1.31492	1.81061	1.48486	2.19031	112.924	120.971
k__Bacteria|p__Firmicutes|c__Bacilli|o__Lactobacillales|f__Lactobacillaceae|g__Lactobacillus|s__Lactobacillus_murinus	14.5817	16.9542	13.9037	16.7708	95.3505	98.918
k__Bacteria|p__Firmicutes|c__Bacilli|o__Lactobacillales|f__Lactobacillaceae|g__Lactobacillus|s__Lactobacillus_reuteri	4.64959	5.80612	1.28964	2.43224	27.7366	41.891
k__Bacteria|p__Firmicutes|c__Clostridia|o__Clostridiales|f__Clostridiaceae|g__Clostridium|s__Clostridium_sp_ASF356	0.41595	0.222933	0.274343	0.195421	65.9557	87.6591
k__Bacteria|p__Firmicutes|c__Clostridia|o__Clostridiales|f__Clostridiaceae|g__Clostridium|s__Clostridium_sp_ASF502	0.231617	0.151397	0.0692651	0.132205	29.9051	87.3238
k__Bacteria|p__Firmicutes|c__Clostridia|o__Clostridiales|f__Lachnospiraceae|g__Dorea|s__Dorea_sp_5_2	0.467437	0.467273	0.178535	0.336294	38.1944	71.9695
k__Bacteria|p__Firmicutes|c__Clostridia|o__Clostridiales|f__Lachnospiraceae|g__Lachnospiraceae_unclassified|s__Lachnospiraceae_bacterium_10_1	4.30458	2.53055	3.5776	2.19465	83.1114	86.7264
k__Bacteria|p__Firmicutes|c__Clostridia|o__Clostridiales|f__Lachnospiraceae|g__Lachnospiraceae_unclassified|s__Lachnospiraceae_bacterium_A2	11.7735	5.25266	10.7176	3.41036	91.0317	64.9263
k__Bacteria|p__Firmicutes|c__Clostridia|o__Clostridiales|f__Lachnospiraceae|g__Lachnospiraceae_unclassified|s__Lachnospiraceae_bacterium_COE1	1.9027	0.599587	1.02939	0.82486	54.1015	137.571
k__Bacteria|p__Firmicutes|c__Clostridia|o__Clostridiales|f__Oscillospiraceae|g__Oscillibacter|s__Oscillibacter_sp_1_3	0.86654	0.601483	0.695191	0.717195	80.2261	119.238
k__Bacteria|p__Firmicutes|c__Clostridia|o__Clostridiales|f__Ruminococcaceae|g__Acutalibacter|s__Acutalibacter_muris	0.11962	0.0741667	0.148968	0.0955049	124.534	128.771
k__Bacteria|p__Firmicutes|c__Clostridia|o__Clostridiales|f__Ruminococcaceae|g__Anaerotruncus|s__Anaerotruncus_sp_G3_2012	0.42634	0.29643	0.217436	0.310901	51.0006	104.882
k__Bacteria|p__Firmicutes|c__Firmicutes_unclassified|o__Firmicutes_unclassified|f__Firmicutes_unclassified|g__Firmicutes_unclassified|s__Firmicutes_bacterium_ASF500	0.14219	0.151363	0.156541	0.217855	110.093	143.929
k__Bacteria|p__Proteobacteria|c__Epsilonproteobacteria|o__Campylobacterales|f__Helicobacteraceae|g__Helicobacter|s__Helicobacter_apodemus	3.08317	2.50119	2.33062	0.24617	75.5917	9.84209
k__Bacteria|p__Proteobacteria|c__Epsilonproteobacteria|o__Campylobacterales|f__Helicobacteraceae|g__Helicobacter|s__Helicobacter_typhlonius	23.4866	12.7342	1.68838	7.79853	7.18871	61.2409

## Sheet: Table_S3
clade_name	Control_avg	MEM_avg	DTT_MEM_avg	Control_std	MEM_std	DTT_MEM_std	Control_CV	MEM_CV	DTT_MEM_CV
k__Bacteria|p__Actinobacteria|c__Actinobacteria|o__Actinomycetales|f__Actinomycetaceae|g__Actinobaculum|s__Actinobaculum_sp_oral_taxon_183	0.07864	0.0820867	0.102507	0.0294497	0.0152178	0.00964544	37.4488	18.5387	9.40957
k__Bacteria|p__Actinobacteria|c__Actinobacteria|o__Actinomycetales|f__Actinomycetaceae|g__Actinomyces|s__Actinomyces_graevenitzii	0.961093	0.93258	0.8838	0.222351	0.0741305	0.191582	23.1352	7.94897	21.6771
k__Bacteria|p__Actinobacteria|c__Actinobacteria|o__Actinomycetales|f__Actinomycetaceae|g__Actinomyces|s__Actinomyces_johnsonii	0.0308533	0.0655133	0.08975	0.0336961	0.0135528	0.0189595	109.214	20.6871	21.1247
k__Bacteria|p__Actinobacteria|c__Actinobacteria|o__Actinomycetales|f__Actinomycetaceae|g__Actinomyces|s__Actinomyces_massiliensis	0.256393	0.204257	0.22814	0.112106	0.0138309	0.0132892	43.7242	6.77133	5.82503
k__Bacteria|p__Actinobacteria|c__Actinobacteria|o__Actinomycetales|f__Actinomycetaceae|g__Actinomyces|s__Actinomyces_naeslundii	0.322347	0.31741	0.291723	0.0380103	0.0275611	0.0180256	11.7918	8.68313	6.17899
k__Bacteria|p__Actinobacteria|c__Actinobacteria|o__Actinomycetales|f__Actinomycetaceae|g__Actinomyces|s__Actinomyces_odontolyticus	2.69963	2.47329	2.63889	0.321063	0.184066	0.211773	11.8928	7.44218	8.02506
k__Bacteria|p__Actinobacteria|c__Actinobacteria|o__Actinomycetales|f__Actinomycetaceae|g__Actinomyces|s__Actinomyces_oris	0.5326	0.633787	0.65315	0.449316	0.0717528	0.0791891	84.3627	11.3213	12.1242
k__Bacteria|p__Actinobacteria|c__Actinobacteria|o__Actinomycetales|f__Actinomycetaceae|g__Actinomyces|s__Actinomyces_sp_HMSC035G02	0.68765	0.727203	0.725647	0.0704902	0.0604945	0.0348754	10.2509	8.31879	4.80611
k__Bacteria|p__Actinobacteria|c__Actinobacteria|o__Actinomycetales|f__Actinomycetaceae|g__Actinomyces|s__Actinomyces_sp_ICM47	0.819423	0.52439	0.696497	0.0658474	0.0482841	0.186971	8.03582	9.20767	26.8445
k__Bacteria|p__Actinobacteria|c__Actinobacteria|o__Actinomycetales|f__Actinomycetaceae|g__Actinomyces|s__Actinomyces_sp_S6_Spd3	0.13954	0.241983	0.250697	0.0310655	0.0120254	0.020979	22.2628	4.96949	8.36827
k__Bacteria|p__Actinobacteria|c__Actinobacteria|o__Actinomycetales|f__Actinomycetaceae|g__Actinomyces|s__Actinomyces_sp_oral_taxon_170	0.102463	0.09257	0.0987267	0.0404582	0.00875264	0.00855355	39.4856	9.45516	8.66387
k__Bacteria|p__Actinobacteria|c__Actinobacteria|o__Actinomycetales|f__Actinomycetaceae|g__Actinomyces|s__Actinomyces_sp_oral_taxon_181	0.12059	0.212497	0.230363	0.0320331	0.0144285	0.0154629	26.5636	6.78998	6.7124
k__Bacteria|p__Actinobacteria|c__Actinobacteria|o__Actinomycetales|f__Actinomycetaceae|g__Actinomyces|s__Actinomyces_sp_oral_taxon_414	0.0143633	0.0259133	0.0322267	0.0128528	0.009757	0.0206467	89.4833	37.6524	64.067
k__Bacteria|p__Actinobacteria|c__Actinobacteria|o__Actinomycetales|f__Actinomycetaceae|g__Actinomyces|s__Actinomyces_sp_oral_taxon_448	0.126007	0.0998367	0.06965	0.205312	0.0476504	0.0234907	162.937	47.7283	33.7267
k__Bacteria|p__Actinobacteria|c__Actinobacteria|o__Actinomycetales|f__Actinomycetaceae|g__Actinomyces|s__Actinomyces_sp_oral_taxon_897	0.0839733	0.175873	0.160723	0.140325	0.233695	0.114957	167.106	132.877	71.5248
k__Bacteria|p__Actinobacteria|c__Actinobacteria|o__Bifidobacteriales|f__Bifidobacteriaceae|g__Bifidobacterium|s__Bifidobacterium_dentium	0.04517	0.0225333	0.01585	0.0782367	0.0112252	0.00546407	173.205	49.8158	34.4737
k__Bacteria|p__Actinobacteria|c__Actinobacteria|o__Corynebacteriales|f__Corynebacteriaceae|g__Corynebacterium|s__Corynebacterium_durum	0.393467	0.316177	0.32096	0.0470732	0.0353845	0.0226098	11.9637	11.1914	7.04444
k__Bacteria|p__Actinobacteria|c__Actinobacteria|o__Corynebacteriales|f__Corynebacteriaceae|g__Corynebacterium|s__Corynebacterium_matruchotii	0.0973067	0.0758267	0.0909967	0.0395648	0.00690487	0.00215092	40.6599	9.10612	2.36373
k__Bacteria|p__Actinobacteria|c__Actinobacteria|o__Micrococcales|f__Micrococcaceae|g__Rothia|s__Rothia_aeria	0.636143	0.48486	0.510163	0.143243	0.0564748	0.0312249	22.5174	11.6476	6.12057
k__Bacteria|p__Actinobacteria|c__Actinobacteria|o__Micrococcales|f__Micrococcaceae|g__Rothia|s__Rothia_dentocariosa	0.285227	0.188557	0.21417	0.0743172	0.00711253	0.00862209	26.0555	3.77209	4.02581
k__Bacteria|p__Actinobacteria|c__Actinobacteria|o__Micrococcales|f__Micrococcaceae|g__Rothia|s__Rothia_mucilaginosa	7.22801	6.39355	6.64161	0.555822	0.429114	0.630551	7.68983	6.71167	9.49396
k__Bacteria|p__Actinobacteria|c__Coriobacteriia|o__Coriobacteriales|f__Atopobiaceae|g__Atopobium|s__Atopobium_parvulum	0.0295267	0.0553367	0.06186	0.0255796	0.0112887	0.00544583	86.6323	20.4001	8.80348
k__Bacteria|p__Actinobacteria|c__Coriobacteriia|o__Coriobacteriales|f__Atopobiaceae|g__Atopobium|s__Atopobium_rimae	0.0814367	0.1307	0.107673	0.0775303	0.0392045	0.0266138	95.2032	29.9958	24.7172
k__Bacteria|p__Actinobacteria|c__Coriobacteriia|o__Coriobacteriales|f__Atopobiaceae|g__Olsenella|s__Olsenella_uli	0.12143	0.22582	0.136603	0.012399	0.031502	0.0193193	10.2108	13.9501	14.1427
k__Bacteria|p__Bacteroidetes|c__Bacteroidia|o__Bacteroidales|f__Porphyromonadaceae|g__Porphyromonas|s__Porphyromonas_endodontalis	0.0956833	0.217987	0.1447	0.0243337	0.0397268	0.0207243	25.4314	18.2244	14.3223
k__Bacteria|p__Bacteroidetes|c__Bacteroidia|o__Bacteroidales|f__Porphyromonadaceae|g__Porphyromonas|s__Porphyromonas_somerae	1.10535	0.62136	0.78765	0.0893326	0.0111466	0.0844652	8.08182	1.79391	10.7237
k__Bacteria|p__Bacteroidetes|c__Bacteroidia|o__Bacteroidales|f__Prevotellaceae|g__Alloprevotella|s__Alloprevotella_tannerae	0.35787	0.36332	0.305013	0.0380047	0.0183041	0.0186096	10.6197	5.038	6.10125
k__Bacteria|p__Bacteroidetes|c__Bacteroidia|o__Bacteroidales|f__Prevotellaceae|g__Prevotella|s__Prevotella_jejuni	0.175447	0.177227	0.178833	0.0455361	0.0187339	0.0172645	25.9544	10.5706	9.65395
k__Bacteria|p__Bacteroidetes|c__Bacteroidia|o__Bacteroidales|f__Prevotellaceae|g__Prevotella|s__Prevotella_melaninogenica	1.98746	0.907117	1.12457	0.213118	0.0836523	0.0551539	10.7231	9.22177	4.90446
k__Bacteria|p__Bacteroidetes|c__Bacteroidia|o__Bacteroidales|f__Prevotellaceae|g__Prevotella|s__Prevotella_micans	0	0.0535067	0.03973	0	0.0163173	0.0153418		30.4959	38.6152
k__Bacteria|p__Bacteroidetes|c__Bacteroidia|o__Bacteroidales|f__Prevotellaceae|g__Prevotella|s__Prevotella_nigrescens	0.75742	0.807237	0.602117	0.0577151	0.0704508	0.0829161	7.61995	8.72741	13.7708
k__Bacteria|p__Bacteroidetes|c__Bacteroidia|o__Bacteroidales|f__Prevotellaceae|g__Prevotella|s__Prevotella_oris	0.181357	0.206787	0.21358	0.0422678	0.0256746	0.0397382	23.3064	12.416	18.6058
k__Bacteria|p__Bacteroidetes|c__Bacteroidia|o__Bacteroidales|f__Prevotellaceae|g__Prevotella|s__Prevotella_pallens	0.95115	0.704067	0.762553	0.163712	0.0712647	0.107842	17.212	10.1219	14.1423
k__Bacteria|p__Bacteroidetes|c__Bacteroidia|o__Bacteroidales|f__Prevotellaceae|g__Prevotella|s__Prevotella_pleuritidis	0.237527	0.207693	0.16055	0.0818771	0.0452069	0.0265539	34.4707	21.7662	16.5393
k__Bacteria|p__Bacteroidetes|c__Bacteroidia|o__Bacteroidales|f__Prevotellaceae|g__Prevotella|s__Prevotella_salivae	0.0220933	0.0535167	0.0531333	0.0260581	0.00716144	0.00401559	117.945	13.3817	7.55757
k__Bacteria|p__Bacteroidetes|c__Bacteroidia|o__Bacteroidales|f__Prevotellaceae|g__Prevotella|s__Prevotella_shahii	0.122733	0.111457	0.13292	0.0325514	0.0108438	0.0023135	26.522	9.72913	1.74052
k__Bacteria|p__Bacteroidetes|c__Bacteroidia|o__Bacteroidales|f__Prevotellaceae|g__Prevotella|s__Prevotella_sp_oral_taxon_306	0.00806	0.0489767	0.0484667	0.0074914	0.00128072	0.0079511	92.9454	2.61495	16.4053
k__Bacteria|p__Bacteroidetes|c__Bacteroidia|o__Bacteroidales|f__Prevotellaceae|g__Prevotella|s__Prevotella_veroralis	0.0291933	0.0788733	0.08276	0.039332	0.00415352	0.0152907	134.729	5.26606	18.4759
k__Bacteria|p__Bacteroidetes|c__Bacteroidia|o__Bacteroidales|f__Tannerellaceae|g__Tannerella|s__Tannerella_forsythia	0.0476367	0.07927	0.0684933	0.0120931	0.0264351	0.0115068	25.3861	33.3482	16.7999
k__Bacteria|p__Bacteroidetes|c__Bacteroidia|o__Bacteroidales|f__Tannerellaceae|g__Tannerella|s__Tannerella_sp_oral_taxon_808	0	0.03157	0.03331	0	0.0114197	0.0156129		36.1725	46.8714
k__Bacteria|p__Bacteroidetes|c__Bacteroidia|o__Bacteroidales|f__Tannerellaceae|g__Tannerella|s__Tannerella_sp_oral_taxon_HOT_286	0.164287	0.18322	0.1633	0.01965	0.0545262	0.0549526	11.9608	29.7599	33.6513
k__Bacteria|p__Bacteroidetes|c__Flavobacteriia|o__Flavobacteriales|f__Flavobacteriaceae|g__Capnocytophaga|s__Capnocytophaga_gingivalis	0.00831	0.0438733	0.05424	0.0108539	0.00138782	0.00990821	130.613	3.16323	18.2674
k__Bacteria|p__Bacteroidetes|c__Flavobacteriia|o__Flavobacteriales|f__Flavobacteriaceae|g__Capnocytophaga|s__Capnocytophaga_leadbetteri	0	0.03341	0.04691	0	0.00933574	0.00493146		27.943	10.5126
k__Bacteria|p__Firmicutes|c__Bacilli|o__Bacillales|f__Bacillales_unclassified|g__Gemella|s__Gemella_bergeri	0.113307	0.13019	0.185047	0.0978706	0.0253928	0.112346	86.3767	19.5044	60.7125
k__Bacteria|p__Firmicutes|c__Bacilli|o__Bacillales|f__Bacillales_unclassified|g__Gemella|s__Gemella_haemolysans	1.04513	1.40313	1.29523	0.185763	0.0987857	0.0708164	17.7741	7.04036	5.46749
k__Bacteria|p__Firmicutes|c__Bacilli|o__Bacillales|f__Bacillales_unclassified|g__Gemella|s__Gemella_morbillorum	0.17793	0.343233	0.26621	0.0254656	0.0593323	0.0496128	14.3122	17.2863	18.6367
k__Bacteria|p__Firmicutes|c__Bacilli|o__Bacillales|f__Bacillales_unclassified|g__Gemella|s__Gemella_sanguinis	11.5329	13.4562	11.5124	1.71367	0.483847	0.699797	14.859	3.59573	6.07865
k__Bacteria|p__Firmicutes|c__Bacilli|o__Lactobacillales|f__Carnobacteriaceae|g__Granulicatella|s__Granulicatella_adiacens	0.0552667	0.0702233	0.0851933	0.00917099	0.0112902	0.0130595	16.5941	16.0775	15.3293
k__Bacteria|p__Firmicutes|c__Bacilli|o__Lactobacillales|f__Carnobacteriaceae|g__Granulicatella|s__Granulicatella_elegans	0.08882	0.0963633	0.107437	0.00165036	0.00656637	0.0126526	1.8581	6.81418	11.7768
k__Bacteria|p__Firmicutes|c__Bacilli|o__Lactobacillales|f__Streptococcaceae|g__Streptococcus|s__Streptococcus_australis	3.94155	4.71536	4.86831	0.260494	0.102264	0.16408	6.60892	2.16873	3.37037
k__Bacteria|p__Firmicutes|c__Bacilli|o__Lactobacillales|f__Streptococcaceae|g__Streptococcus|s__Streptococcus_cristatus	0.0621767	0.164347	0.16991	0.0528732	0.0199714	0.020315	85.0371	12.152	11.9563
k__Bacteria|p__Firmicutes|c__Bacilli|o__Lactobacillales|f__Streptococcaceae|g__Streptococcus|s__Streptococcus_gordonii	0.00962333	0.06004	0.07409	0.0166681	0.00257245	0.0115883	173.205	4.28456	15.6408
k__Bacteria|p__Firmicutes|c__Bacilli|o__Lactobacillales|f__Streptococcaceae|g__Streptococcus|s__Streptococcus_infantis	9.67955	7.03034	7.39211	0.237898	0.382357	0.271829	2.45773	5.43866	3.67728
k__Bacteria|p__Firmicutes|c__Bacilli|o__Lactobacillales|f__Streptococcaceae|g__Streptococcus|s__Streptococcus_massiliensis	0.08723	0.19564	0.123237	0.0711652	0.0241538	0.0247023	81.5834	12.3461	20.0446
k__Bacteria|p__Firmicutes|c__Bacilli|o__Lactobacillales|f__Streptococcaceae|g__Streptococcus|s__Streptococcus_mitis	1.78208	1.48526	1.4705	0.0619963	0.122404	0.252661	3.47888	8.24124	17.182
k__Bacteria|p__Firmicutes|c__Bacilli|o__Lactobacillales|f__Streptococcaceae|g__Streptococcus|s__Streptococcus_oralis	0.928877	1.0265	0.883503	0.111885	0.0679998	0.0129851	12.0452	6.62441	1.46973
k__Bacteria|p__Firmicutes|c__Bacilli|o__Lactobacillales|f__Streptococcaceae|g__Streptococcus|s__Streptococcus_parasanguinis	1.1995	1.51517	1.28856	0.0846059	0.104657	0.0873969	7.05341	6.9073	6.78254
k__Bacteria|p__Firmicutes|c__Bacilli|o__Lactobacillales|f__Streptococcaceae|g__Streptococcus|s__Streptococcus_pneumoniae	0	0.10618	0.11272	0	0.016334	0.0492234		15.3833	43.6688
k__Bacteria|p__Firmicutes|c__Bacilli|o__Lactobacillales|f__Streptococcaceae|g__Streptococcus|s__Streptococcus_pseudopneumoniae	0.108013	0.168843	0.161473	0.0363957	0.0174517	0.00252462	33.6956	10.336	1.56349
k__Bacteria|p__Firmicutes|c__Bacilli|o__Lactobacillales|f__Streptococcaceae|g__Streptococcus|s__Streptococcus_salivarius	13.7406	13.5432	13.9926	0.852937	0.659196	1.44048	6.20744	4.86734	10.2946
k__Bacteria|p__Firmicutes|c__Bacilli|o__Lactobacillales|f__Streptococcaceae|g__Streptococcus|s__Streptococcus_sanguinis	3.58163	2.56674	2.23943	0.605306	0.116605	0.260917	16.9003	4.54291	11.651
k__Bacteria|p__Firmicutes|c__Bacilli|o__Lactobacillales|f__Streptococcaceae|g__Streptococcus|s__Streptococcus_sp_A12	0.30026	0.20821	0.160887	0.221555	0.0227279	0.0144931	73.7879	10.9158	9.00826
k__Bacteria|p__Firmicutes|c__Bacilli|o__Lactobacillales|f__Streptococcaceae|g__Streptococcus|s__Streptococcus_sp_F0442	0.287447	0.370733	0.38592	0.0390598	0.0240805	0.0917519	13.5886	6.49538	23.7748
k__Bacteria|p__Firmicutes|c__Bacilli|o__Lactobacillales|f__Streptococcaceae|g__Streptococcus|s__Streptococcus_sp_HMSC034E03	0.65611	0.655677	0.64504	0.105533	0.0275754	0.0369731	16.0846	4.20563	5.73192
k__Bacteria|p__Firmicutes|c__Bacilli|o__Lactobacillales|f__Streptococcaceae|g__Streptococcus|s__Streptococcus_sp_HMSC067H01	0.66818	0.53585	0.458503	0.0485856	0.0309975	0.0364129	7.27133	5.78474	7.94168
k__Bacteria|p__Firmicutes|c__Bacilli|o__Lactobacillales|f__Streptococcaceae|g__Streptococcus|s__Streptococcus_sp_HMSC071D03	0.0939367	0.11146	0.11005	0.0713705	0.0333289	0.00822905	75.9772	29.9021	7.47756
k__Bacteria|p__Firmicutes|c__Bacilli|o__Lactobacillales|f__Streptococcaceae|g__Streptococcus|s__Streptococcus_sp_HPH0090	0.257077	0.05674	0.06793	0.0989074	0.00717711	0.0199213	38.4739	12.6491	29.3263
k__Bacteria|p__Firmicutes|c__Clostridia|o__Clostridiales|f__Clostridiales_Family_XIII_Incertae_Sedis|g__Clostridiales_Family_XIII_Incertae_Sedis_unclassified|s__Eubacterium_brachy	0.30295	0.41157	0.328877	0.0694937	0.0541574	0.0522592	22.939	13.1587	15.8902
k__Bacteria|p__Firmicutes|c__Clostridia|o__Clostridiales|f__Clostridiales_Family_XIII_Incertae_Sedis|g__Clostridiales_Family_XIII_Incertae_Sedis_unclassified|s__Eubacterium_infirmum	0.0171367	0.0696967	0.0474267	0.016078	0.0147391	0.00594224	93.8224	21.1475	12.5293
k__Bacteria|p__Firmicutes|c__Clostridia|o__Clostridiales|f__Clostridiales_Family_XIII_Incertae_Sedis|g__Clostridiales_Family_XIII_Incertae_Sedis_unclassified|s__Eubacterium_sulci	0.228707	0.16536	0.17264	0.0586676	0.00679015	0.00318019	25.6519	4.10628	1.84209
k__Bacteria|p__Firmicutes|c__Clostridia|o__Clostridiales|f__Clostridiales_Family_XIII_Incertae_Sedis|g__Mogibacterium|s__Mogibacterium_diversum	0.182963	0.21966	0.219387	0.069112	0.010426	0.00910873	37.7737	4.74644	4.15191
k__Bacteria|p__Firmicutes|c__Clostridia|o__Clostridiales|f__Lachnospiraceae|g__Lachnoanaerobaculum|s__Lachnoanaerobaculum_saburreum	0.0656433	0.0728867	0.0862467	0.0236061	0.00964103	0.0181804	35.9612	13.2274	21.0795
k__Bacteria|p__Firmicutes|c__Clostridia|o__Clostridiales|f__Lachnospiraceae|g__Lachnoanaerobaculum|s__Lachnoanaerobaculum_umeaense	0.453143	0.367243	0.391277	0.0693439	0.03718	0.0750794	15.3029	10.1241	19.1883
k__Bacteria|p__Firmicutes|c__Clostridia|o__Clostridiales|f__Lachnospiraceae|g__Lachnospiraceae_unclassified|s__Lachnospiraceae_bacterium_oral_taxon_096	0.30079	0.277743	0.29651	0.0490909	0.0205907	0.0165426	16.3206	7.41355	5.57912
k__Bacteria|p__Firmicutes|c__Clostridia|o__Clostridiales|f__Lachnospiraceae|g__Oribacterium|s__Oribacterium_parvum	0.183813	0.159707	0.17345	0.0506668	0.0145656	0.00570053	27.5642	9.12025	3.28656
k__Bacteria|p__Firmicutes|c__Clostridia|o__Clostridiales|f__Lachnospiraceae|g__Oribacterium|s__Oribacterium_sinus	0.173547	0.119527	0.138907	0.0132935	0.0113781	0.00705965	7.65988	9.51926	5.0823
k__Bacteria|p__Firmicutes|c__Clostridia|o__Clostridiales|f__Peptostreptococcaceae|g__Peptostreptococcus|s__Peptostreptococcus_stomatis	0.0282233	0.0562767	0.0598267	0.0192005	0.0191312	0.0277578	68.0304	33.9948	46.3971
k__Bacteria|p__Firmicutes|c__Erysipelotrichia|o__Erysipelotrichales|f__Erysipelotrichaceae|g__Bulleidia|s__Bulleidia_extructa	0.0215867	0.0524033	0.0316567	0.00628597	0.0143303	0.00322244	29.1197	27.3462	10.1793
k__Bacteria|p__Firmicutes|c__Erysipelotrichia|o__Erysipelotrichales|f__Erysipelotrichaceae|g__Solobacterium|s__Solobacterium_moorei	0.0264867	0.105723	0.0790967	0.0236454	0.00496997	0.0112833	89.2729	4.70092	14.2653
k__Bacteria|p__Firmicutes|c__Negativicutes|o__Selenomonadales|f__Selenomonadaceae|g__Selenomonas|s__Selenomonas_infelix	0	0.0241433	0.00534667	0	0.0389692	0.00538095		161.408	100.641
k__Bacteria|p__Firmicutes|c__Negativicutes|o__Selenomonadales|f__Selenomonadaceae|g__Selenomonas|s__Selenomonas_sputigena	0	0.0351	0.0153733	0	0.0441056	0.0075508		125.657	49.1162
k__Bacteria|p__Firmicutes|c__Negativicutes|o__Veillonellales|f__Veillonellaceae|g__Dialister|s__Dialister_pneumosintes	0	0.0538133	0.0485067	0	0.0168368	0.0103517		31.2874	21.3408
k__Bacteria|p__Firmicutes|c__Negativicutes|o__Veillonellales|f__Veillonellaceae|g__Megasphaera|s__Megasphaera_micronuciformis	0.0354333	0.0951167	0.10614	0.0201734	0.00612054	0.0158348	56.9334	6.43477	14.9188
k__Bacteria|p__Firmicutes|c__Negativicutes|o__Veillonellales|f__Veillonellaceae|g__Veillonella|s__Veillonella_atypica	0.69484	0.475143	0.520963	0.0959886	0.0232758	0.0980207	13.8145	4.89868	18.8153
k__Bacteria|p__Firmicutes|c__Negativicutes|o__Veillonellales|f__Veillonellaceae|g__Veillonella|s__Veillonella_dispar	1.71965	1.51874	1.43432	0.225658	0.0944571	0.134092	13.1223	6.21944	9.3488
k__Bacteria|p__Firmicutes|c__Negativicutes|o__Veillonellales|f__Veillonellaceae|g__Veillonella|s__Veillonella_infantium	1.05347	0.812827	0.873613	0.096764	0.0290855	0.0267735	9.1853	3.57832	3.06468
k__Bacteria|p__Firmicutes|c__Negativicutes|o__Veillonellales|f__Veillonellaceae|g__Veillonella|s__Veillonella_parvula	0.659723	0.42851	0.470393	0.0995521	0.0203184	0.0505331	15.09	4.74163	10.7427
k__Bacteria|p__Firmicutes|c__Negativicutes|o__Veillonellales|f__Veillonellaceae|g__Veillonella|s__Veillonella_rogosae	0.850537	0.936977	1.05933	0.16433	0.189914	0.0175815	19.3207	20.2688	1.65968
k__Bacteria|p__Firmicutes|c__Negativicutes|o__Veillonellales|f__Veillonellaceae|g__Veillonella|s__Veillonella_tobetsuensis	0.0736533	0.15975	0.22259	0.0838525	0.0198524	0.0776676	113.847	12.4272	34.8927
k__Bacteria|p__Firmicutes|c__Tissierellia|o__Tissierellales|f__Peptoniphilaceae|g__Parvimonas|s__Parvimonas_micra	0.33185	0.396227	0.30781	0.0667832	0.0316314	0.0673254	20.1245	7.98315	21.8724
k__Bacteria|p__Firmicutes|c__Tissierellia|o__Tissierellales|f__Peptoniphilaceae|g__Parvimonas|s__Parvimonas_sp_oral_taxon_110	0.0364967	0.0967733	0.0711067	0.0495229	0.0225798	0.00679647	135.692	23.3326	9.55814
k__Bacteria|p__Firmicutes|c__Tissierellia|o__Tissierellales|f__Peptoniphilaceae|g__Peptoniphilus|s__Peptoniphilus_lacrimalis	0	0.05061	0.0317767	0	0.0186872	0.00939782		36.9238	29.5746
k__Bacteria|p__Fusobacteria|c__Fusobacteriia|o__Fusobacteriales|f__Fusobacteriaceae|g__Fusobacterium|s__Fusobacterium_nucleatum	0.561087	0.466203	0.423553	0.201726	0.10761	0.0579819	35.9528	23.0821	13.6894
k__Bacteria|p__Fusobacteria|c__Fusobacteriia|o__Fusobacteriales|f__Fusobacteriaceae|g__Fusobacterium|s__Fusobacterium_periodonticum	3.4729	2.11296	2.33439	0.550375	0.0881279	0.132761	15.8477	4.17084	5.68717
k__Bacteria|p__Fusobacteria|c__Fusobacteriia|o__Fusobacteriales|f__Leptotrichiaceae|g__Leptotrichia|s__Leptotrichia_sp_oral_taxon_215	0.420067	0.35039	0.37611	0.0551984	0.0316364	0.03217	13.1404	9.02891	8.55335
k__Bacteria|p__Fusobacteria|c__Fusobacteriia|o__Fusobacteriales|f__Leptotrichiaceae|g__Leptotrichia|s__Leptotrichia_wadei	0.176893	0.200583	0.22474	0.0645822	0.0120506	0.0347351	36.5091	6.0078	15.4557
k__Bacteria|p__Proteobacteria|c__Betaproteobacteria|o__Burkholderiales|f__Burkholderiaceae|g__Lautropia|s__Lautropia_mirabilis	0.662363	0.353527	0.368827	0.0649627	0.0486502	0.0256681	9.80771	13.7614	6.9594
k__Bacteria|p__Proteobacteria|c__Betaproteobacteria|o__Neisseriales|f__Neisseriaceae|g__Neisseria|s__Neisseria_flavescens	7.70362	11.6594	12.6562	0.435868	1.01913	1.12847	5.65797	8.74089	8.91631
k__Bacteria|p__Proteobacteria|c__Betaproteobacteria|o__Neisseriales|f__Neisseriaceae|g__Neisseria|s__Neisseria_sicca	1.57131	1.71129	1.70715	0.120597	0.130211	0.125232	7.67493	7.60892	7.33574
k__Bacteria|p__Proteobacteria|c__Betaproteobacteria|o__Neisseriales|f__Neisseriaceae|g__Neisseria|s__Neisseria_subflava	1.37146	1.60761	1.65489	0.370584	0.157638	0.125399	27.0211	9.80572	7.57748
k__Bacteria|p__Proteobacteria|c__Epsilonproteobacteria|o__Campylobacterales|f__Campylobacteraceae|g__Campylobacter|s__Campylobacter_concisus	0.12262	0.124067	0.122223	0.0537972	0.0200763	0.0106474	43.8731	16.1819	8.71146
k__Bacteria|p__Proteobacteria|c__Epsilonproteobacteria|o__Campylobacterales|f__Campylobacteraceae|g__Campylobacter|s__Campylobacter_showae	0.21127	0.15976	0.193637	0.0511487	0.00613739	0.0265657	24.2101	3.84163	13.7194
k__Bacteria|p__Proteobacteria|c__Gammaproteobacteria|o__Cardiobacteriales|f__Cardiobacteriaceae|g__Cardiobacterium|s__Cardiobacterium_hominis	0.176187	0.118437	0.123727	0.0870555	0.012305	0.0120795	49.411	10.3895	9.76303
k__Bacteria|p__Proteobacteria|c__Gammaproteobacteria|o__Pasteurellales|f__Pasteurellaceae|g__Haemophilus|s__Haemophilus_parahaemolyticus	0.180837	0.46841	0.47382	0.0399754	0.113105	0.0801883	22.1058	24.1465	16.9238
k__Bacteria|p__Proteobacteria|c__Gammaproteobacteria|o__Pasteurellales|f__Pasteurellaceae|g__Haemophilus|s__Haemophilus_parainfluenzae	2.21683	2.06346	1.99548	0.0891265	0.231385	0.0740254	4.02045	11.2135	3.70966
k__Bacteria|p__Proteobacteria|c__Gammaproteobacteria|o__Pasteurellales|f__Pasteurellaceae|g__Haemophilus|s__Haemophilus_paraphrohaemolyticus	0	0.0462533	0.0570167	0	0.00840351	0.018172		18.1684	31.8714
k__Bacteria|p__Proteobacteria|c__Gammaproteobacteria|o__Pasteurellales|f__Pasteurellaceae|g__Haemophilus|s__Haemophilus_sp_HMSC71H05	0.434897	0	0	0.236991	0	0	54.4937
k__Bacteria|p__Proteobacteria|c__Gammaproteobacteria|o__Pasteurellales|f__Pasteurellaceae|g__Haemophilus|s__Haemophilus_sputorum	0.61037	0.80572	0.868023	0.201752	0.0595334	0.0491339	33.054	7.38884	5.66043
k__Bacteria|p__Spirochaetes|c__Spirochaetia|o__Spirochaetales|f__Spirochaetaceae|g__Treponema|s__Treponema_lecithinolyticum	0.0274	0.02562	0.02525	0.0268248	0.00829685	0.00287188	97.9007	32.3843	11.3738
k__Bacteria|p__Spirochaetes|c__Spirochaetia|o__Spirochaetales|f__Spirochaetaceae|g__Treponema|s__Treponema_socranskii	0	0.02614	0.0198267	0	0.0271544	0.00550238		103.881	27.7524

## Sheet: Table_S4
taxonomy	Biopsy_Blank_1	Biopsy_Blank_2	Biopsy_Blank_3	CT15_Cntrl_1	CT15_Cntrl_2	CT15_Cntrl_3	CT15_Cntrl_4	CT15_MEM_1	CT15_MEM_2	CT15_MEM_3	CT15_MEM_4	CT17_Cntrl_1	CT17_Cntrl_2	CT17_Cntrl_3	CT17_Cntrl_4	CT17_MEM_1	CT17_MEM_2	CT17_MEM_3	CT17_MEM_4	CT18_Cntrl_1	CT18_Cntrl_2	CT18_Cntrl_3	CT18_Cntrl_4	CT18_MEM_1	CT18_MEM_2	CT18_MEM_3	CT18_MEM_4	CT19_Cntrl_1	CT19_Cntrl_2	CT19_Cntrl_3	CT19_Cntrl_4	CT19_MEM_1	CT19_MEM_2	CT19_MEM_3	CT19_MEM_4
D_0__Bacteria;D_1__Firmicutes;D_2__Clostridia;D_3__Clostridiales;D_4__Lachnospiraceae;D_5__Blautia	0	0	0	210.259	691.753	100.306	43.0827	98.6712	12.7766	15.8593	12.5895	147.113	801.656	247.928	887.277	43.6911	121.615	45.379	18.1496	1185.85	1601.21	5343.59	7293.76	1349.36	406.212	798.841	963.89	32919	15615.7	47801.4	87501.5	470.799	4840.94	2072.18	1880.32
D_0__Bacteria;D_1__Firmicutes;D_2__Clostridia;D_3__Clostridiales;D_4__Lachnospiraceae;D_5__Anaerostipes	0	0	0	632.483	1844.32	170.026	173.585	53.0537	5.89691	10.7406	8.86121	15.0613	107.447	40.3851	170.656	3.27411	9.26784	7.90098	2.01375	31.8978	46.9465	189.647	257.946	59.2992	13.8328	39.9421	36.1267	14208.7	5663.43	20191.3	36596.9	69.9254	571.402	706.263	216.496
D_0__Bacteria;D_1__Bacteroidetes;D_2__Bacteroidia;D_3__Bacteroidales;D_4__Bacteroidaceae;D_5__Bacteroides	0	0	0	176.41	657.815	108.195	51.0919	105.545	7.40781	8.48158	4.156	374.091	1188.63	593.023	2247.77	129.909	385.027	154.214	106.187	1883.85	2804.21	7856.42	9157.08	5882.72	1528.36	1627.78	2601.12	5746.94	3192.32	7904.22	20830.4	143.874	682.619	193.595	475.256
D_0__Bacteria;D_1__Verrucomicrobia;D_2__Verrucomicrobiae;D_3__Verrucomicrobiales;D_4__Akkermansiaceae;D_5__Akkermansia	0	0	0	0.682106	5.8331	2.38743	0	4.59299	0.693107	0	0	0	0	0	6.11915	0	1.44166	0	0	43.1558	56.1681	262.16	240.976	298.916	64.4407	134.052	196.006	9511.37	4621.18	14721.3	33496.9	446.66	3125.4	927.159	1205.82
D_0__Bacteria;D_1__Firmicutes;D_2__Clostridia;D_3__Clostridiales;D_4__Ruminococcaceae;D_5__Faecalibacterium	0	0	0	149.552	500.586	68.9931	33.2251	6.49893	0	0	0.971671	107.058	681.617	241.855	1483.55	41.945	82.4837	42.111	27.9344	1079.52	1358.09	4743.97	5915.79	1362.67	320.854	670.261	1095.33	2761.52	1550.94	5011.93	10352.1	45.212	203.787	25.3714	133.693
D_0__Bacteria;D_1__Firmicutes;D_2__Clostridia;D_3__Clostridiales;D_4__Lachnospiraceae;D_5__[Ruminococcus] torques group	0	0	0	4.1779	72.3835	7.09307	3.08048	18.3095	2.61841	0.682839	2.67209	81.4126	555.283	151.975	658.828	31.4678	95.2528	33.4654	14.1737	766.173	783.838	2947.9	4228.96	965.73	306.009	691.052	797.093	1660.64	899.818	2823.91	4292.32	12.644	122.538	33.0931	43.7017
D_0__Bacteria;D_1__Firmicutes;D_2__Clostridia;D_3__Clostridiales;D_4__Lachnospiraceae;D_5__Agathobacter	0	0	0	0	5.8331	0	0	0	0	0	0	34.1933	195.587	75.6081	299.838	12.5871	81.351	15.802	6.14453	425.929	410.782	1441.88	2240.06	579.68	247.978	290.537	351.274	2616.91	1621.03	3323.05	5414.49	23.1807	171.82	33.6447	81.3657
D_0__Bacteria;D_1__Firmicutes;D_2__Negativicutes;D_3__Selenomonadales;D_4__Acidaminococcaceae;D_5__Phascolarctobacterium	0	0	0	2.04632	1.59085	0	0	1.1873	0	0.70851	0	32.3208	93.5965	61.3367	241.366	26.8113	55.4011	25.3162	11.1273	123.838	235.571	616.354	862.083	355.795	103.577	164.693	146.813	1725.95	877.21	3261.52	6059.74	49.4267	280.373	246.268	83.0907
D_0__Bacteria;D_1__Proteobacteria;D_2__Gammaproteobacteria;D_3__Enterobacteriales;D_4__Enterobacteriaceae;__	0	0	0	0	0	0	0	0	0	0	0	0	0	0	0	0	0	0	0	869.371	1356.42	4612.89	4670.18	684.966	316.468	496.266	1229.08	0	0	0	0	0	0	0	0
D_0__Bacteria;D_1__Firmicutes;D_2__Clostridia;D_3__Clostridiales;D_4__Ruminococcaceae;D_5__Subdoligranulum	0	0	0	40.9263	118.518	22.248	8.00924	34.9005	2.23701	4.77474	2.22322	44.3699	300.936	85.173	508.569	31.6497	72.907	37.5193	23.5454	409.042	518.926	1494.87	2111.08	652.291	217.614	376.44	366.647	853.644	449.909	1251.27	2917.65	19.6366	121.207	70.0471	65.8401
D_0__Bacteria;D_1__Bacteroidetes;D_2__Bacteroidia;D_3__Bacteroidales;D_4__Rikenellaceae;D_5__Alistipes	0	0	0	12.4484	15.6433	3.77144	1.34221	9.93586	4.22465	2.46438	3.39029	32.0766	152.357	62.7031	247.486	39.1074	118.628	44.2621	29.1478	275.822	329.464	1006.8	1069.12	469.553	202.431	357.29	272.103	988.921	497.387	1039.31	2945.71	78.9295	277.043	105.346	200.395
D_0__Bacteria;D_1__Firmicutes;D_2__Clostridia;D_3__Clostridiales;D_4__Lachnospiraceae;D_5__Lachnoclostridium	0	0	0	7.24737	10.6056	1.93762	0	9.061	1.03049	1.22192	0	13.026	73.0304	21.8626	55.7522	7.31217	12.1512	5.6672	6.22198	84.4353	97.2463	351.405	532.862	212.993	61.0668	78.7898	120.678	862.974	474.779	1470.08	3100.01	11.7819	103.891	52.949	45.4268
D_0__Bacteria;D_1__Bacteroidetes;D_2__Bacteroidia;D_3__Bacteroidales;D_4__Tannerellaceae;D_5__Parabacteroides	0	0	0	0	0	0	0	0	0	0	0	44.5327	208.179	72.7235	348.791	37.6886	123.571	48.9365	25.4301	198.267	217.966	725.122	746.686	1063.75	241.231	350.177	408.154	326.531	246.433	451.279	1472.85	26.5333	90.5719	38.8844	42.5517
D_0__Bacteria;D_1__Firmicutes;D_2__Clostridia;D_3__Clostridiales;D_4__Lachnospiraceae;__	0	0	0	11.5105	34.9986	4.87865	2.79443	6.21772	1.33854	1.24759	4.00286	4.88476	30.6392	8.80576	38.0747	1.67343	5.76665	1.98559	0.697068	292.084	278.326	1040.27	1415.31	720.062	206.48	339.781	279.79	349.854	210.259	512.817	1585.07	6.03466	35.2964	20.4074	25.301
D_0__Bacteria;D_1__Firmicutes;D_2__Negativicutes;D_3__Selenomonadales;D_4__Veillonellaceae;D_5__Megamonas	0	0	0	0	0	0	0	0	0	0	0	0	0	0	0	0	0	0	0	427.806	732.7	1840.7	2569.28	716.431	134.617	271.387	406.617	0	0	0	0	0	0	0	0
D_0__Bacteria;D_1__Firmicutes;D_2__Bacilli;D_3__Lactobacillales;D_4__Streptococcaceae;D_5__Streptococcus	0	0	0	5.03053	13.7873	1.69542	0.770119	5.59283	0.678438	0.718778	1.77436	1.46543	5.03658	3.94741	0	1.20051	6.28153	0	1.05851	370.265	494.615	2253.46	2073.75	381.209	117.748	214.483	439.669	116.618	0	61.538	378.734	5.93887	15.9833	2.75776	1.72507
D_0__Bacteria;D_1__Firmicutes;D_2__Clostridia;D_3__Clostridiales;D_4__Lachnospiraceae;D_5__Dorea	0	0	0	34.6169	116.397	11.0375	7.41515	16.0286	1.72727	4.18432	7.7364	54.5465	501.14	110.679	805.008	14.1514	43.4559	11.0035	13.4508	275.822	372.218	1073.74	1883.68	657.132	110.325	235.822	372.796	0	0	0	0	0	0	0	0
D_0__Bacteria;D_1__Firmicutes;D_2__Clostridia;D_3__Clostridiales;D_4__Lachnospiraceae;D_5__Lachnospira	0	0	0	0	0	0	0	0	0	0	0	0	0	0	0	1.05499	0	0	0	232.666	266.589	1068.16	1014.81	1031.08	241.568	342.517	502.699	60.6414	20.3477	68.3756	112.217	0	7.99164	0	0
D_0__Bacteria;D_1__Firmicutes;D_2__Clostridia;D_3__Clostridiales;D_4__Ruminococcaceae;D_5__Ruminococcaceae UCG-002	0	0	0	6.05369	38.9757	3.42544	2.22234	3.53067	0.660102	0	0	15.2242	96.9542	32.7939	178.135	8.76733	20.0803	3.97118	0.955241	31.8978	41.0782	117.135	162.913	31.4649	8.43464	9.84873	24.5969	545.773	246.433	724.781	2272.4	7.2799	78.5844	20.4074	16.1006
D_0__Bacteria;D_1__Proteobacteria;D_2__Gammaproteobacteria;D_3__Betaproteobacteriales;D_4__Burkholderiaceae;D_5__Sutterella	0	0	0	0	2.12113	0	0	0.843611	0	0	0	0	0	0	5.43924	0	0	0	0	40.0286	57.0064	206.381	261.34	262.611	64.778	113.808	137.589	494.461	262.259	711.106	1949.78	21.3608	89.9059	18.2012	49.1644
D_0__Bacteria;D_1__Firmicutes;D_2__Clostridia;D_3__Clostridiales;D_4__Lachnospiraceae;D_5__Lachnospiraceae NK4A136 group	0	0	0	5.20106	11.9313	2.87183	0.748116	5.87403	0	0.949814	0	24.261	116.681	39.4741	99.2662	18.0803	39.7487	15.0574	6.60924	21.2652	29.3415	58.5676	78.0626	10.8917	6.07294	0	29.2088	643.732	275.824	779.482	1416.74	10.6325	37.2943	11.031	26.7385
D_0__Bacteria;D_1__Firmicutes;D_2__Clostridia;D_3__Clostridiales;D_4__Lachnospiraceae;D_5__Coprococcus 1	0	0	0	4.1779	32.0821	2.04142	0	4.90544	0	1.17572	0	10.6651	80.1656	25.81	138.701	3.34687	10.5035	4.09527	3.69188	44.4067	79.6413	195.225	386.919	78.6622	21.5927	38.8478	35.358	433.819	153.738	690.594	1276.47	4.21468	27.3048	6.8944	15.2381
D_0__Bacteria;D_1__Firmicutes;D_2__Negativicutes;D_3__Selenomonadales;D_4__Veillonellaceae;D_5__Megasphaera	0	0	0	0	0	0	0	0	0	0	0	0	0	0	0	0	0	0	0	169.496	274.134	1048.64	1126.82	411.464	102.228	225.426	291.319	0	0	0	0	0	0	0	0
D_0__Bacteria;D_1__Firmicutes;D_2__Clostridia;D_3__Clostridiales;D_4__Lachnospiraceae;D_5__Roseburia	0	0	0	3.83684	10.6056	3.35624	0.616095	0	0	0	0	13.2703	120.039	36.7413	169.296	2.14636	0.617856	0.661863	0	144.478	144.193	683.288	760.262	20.5732	7.75987	15.3202	35.358	205.248	140.173	471.792	631.223	1.05367	4.66179	0	2.01258
D_0__Bacteria;D_1__Firmicutes;D_2__Clostridia;D_3__Clostridiales;D_4__Lachnospiraceae;D_5__CAG-56	0	0	0	0	0	0	0	0	0	0	0	29.5528	194.328	69.687	396.385	11.5685	37.2773	14.1887	8.05501	146.98	166.828	571.731	719.534	301.337	63.0911	176.73	229.058	55.9767	18.0868	47.8629	224.435	0	5.32776	0	4.60018
D_0__Bacteria;D_1__Firmicutes;D_2__Erysipelotrichia;D_3__Erysipelotrichales;D_4__Erysipelotrichaceae;D_5__Erysipelotrichaceae UCG-003	0	0	0	8.52632	25.4535	4.60185	2.44238	11.3731	1.2762	1.79181	0	2.84944	46.1687	13.9678	112.864	6.69373	16.4762	5.419	4.6213	207.023	229.702	872.936	1062.33	298.916	108.976	181.654	205.999	0	0	0	0	0	0	0	0
D_0__Bacteria;D_1__Firmicutes;D_2__Clostridia;D_3__Clostridiales;D_4__Ruminococcaceae;D_5__uncultured	0	0	0	0	0	0	0	0.687387	0	0	0	3.2565	7.97459	6.07294	14.278	0.945853	0.823808	1.40646	0	143.227	222.996	649.821	763.656	473.183	127.532	282.877	347.431	69.9708	0	61.538	182.353	0.670517	16.6492	3.03354	6.32525
D_0__Bacteria;D_1__Firmicutes;D_2__Negativicutes;D_3__Selenomonadales;D_4__Acidaminococcaceae;D_5__Acidaminococcus	0	0	0	0	0	0	0	0	0	0	0	0	0	0	0	0	0	0	0	141.351	212.097	549.42	729.716	205.732	51.9574	138.976	168.335	130.612	76.8689	273.502	504.978	2.77786	17.3152	7.17018	9.48787
D_0__Bacteria;D_1__Bacteroidetes;D_2__Bacteroidia;D_3__Bacteroidales;D_4__Marinifilaceae;D_5__Odoribacter	0	0	0	0	0	0	0	0	0	0	0	12.9446	56.6615	17.9152	118.304	5.67512	19.4625	6.28769	1.65231	50.0358	67.0664	175.703	200.248	68.9807	22.2675	24.0747	43.8132	205.248	122.086	314.528	1388.69	10.5367	53.9436	14.3404	14.6631
D_0__Bacteria;D_1__Proteobacteria;D_2__Gammaproteobacteria;D_3__Pasteurellales;D_4__Pasteurellaceae;D_5__Haemophilus	0	0	0	0	0	0	0	1.59349	0	0	0	0	0	1.06276	0	0.800337	0	0.620496	0	50.0358	110.66	1508.81	380.131	194.84	62.4163	136.241	479.639	0	0	41.0254	0	0	0	0	0
D_0__Bacteria;D_1__Firmicutes;D_2__Clostridia;D_3__Clostridiales;D_4__Lachnospiraceae;D_5__Fusicatenibacter	0	0	0	18.0758	35.794	5.01705	6.60102	2.37461	0	1.19625	0	62.8505	308.071	94.1306	306.637	12.5507	28.6273	15.7192	9.65568	108.828	111.498	362.561	519.286	84.7131	30.0273	55.8095	74.5593	111.953	36.1736	157.264	336.652	1.43682	9.98955	2.48198	5.75022
D_0__Bacteria;D_1__Firmicutes;D_2__Erysipelotrichia;D_3__Erysipelotrichales;D_4__Erysipelotrichaceae;D_5__Holdemanella	0	0	0	0	0	0	0	0	0	0	0	0	0	0	0	0	0	0	0	0	0	0	0	0	0	0	0	331.195	158.26	300.853	1977.83	5.17256	62.6012	25.6472	41.9766
D_0__Bacteria;D_1__Firmicutes;D_2__Clostridia;D_3__Clostridiales;D_4__Ruminococcaceae;D_5__Ruminiclostridium 5	0	0	0	4.26316	11.6662	3.35624	2.33236	5.71781	0	0	2.24435	3.74498	18.8872	7.89482	48.2733	3.49238	8.44403	2.89565	2.65919	0	10.06	16.7336	33.9403	7.26113	7.0851	3.28291	9.99248	363.848	187.651	553.842	1332.58	10.6325	57.9394	30.6111	26.1635
D_0__Bacteria;D_1__Firmicutes;D_2__Clostridia;D_3__Clostridiales;D_4__Ruminococcaceae;D_5__Ruminococcaceae UCG-005	0	0	0	0.682106	0	0	0	0	0	0	0.744595	9.36245	46.1687	18.6743	84.3083	7.27579	21.419	5.1708	2.11702	17.5125	16.7666	39.0451	71.2745	53.2483	7.75987	24.6218	31.5148	167.93	126.608	218.802	1753.4	6.89675	27.3048	2.48198	13.8005
D_0__Bacteria;D_1__Firmicutes;D_2__Clostridia;D_3__Clostridiales;D_4__Lachnospiraceae;D_5__[Eubacterium] hallii group	0	0	0	0	0	0	0	0.999835	0	0	0	17.0966	95.695	32.9457	167.937	1.74619	9.47379	2.19242	10.6109	127.591	159.283	702.811	702.563	235.987	65.1154	136.788	151.425	0	0	0	0	0	0	0	0
D_0__Bacteria;D_1__Firmicutes;D_2__Clostridia;D_3__Clostridiales;D_4__Lachnospiraceae;D_5__Coprococcus 3	0	0	0	9.9758	47.7254	8.13109	3.10248	14.0602	0.839797	2.25902	4.40948	8.71115	44.0701	14.2714	77.5092	1.63705	10.5035	3.92981	0	0	0	0	0	0	0	0	0	303.207	149.216	505.979	1136.2	3.63995	36.6283	15.7192	7.47529
D_0__Bacteria;D_1__Bacteroidetes;D_2__Bacteroidia;D_3__Bacteroidales;D_4__Barnesiellaceae;D_5__Barnesiella	0	0	0	0	0	0	0	0	0	0	0	10.1766	63.7967	19.4334	112.184	10.3316	35.5267	19.2767	4.00169	0	0	0	0	0	0	0	0	293.878	194.433	478.629	1023.98	11.2072	87.2421	15.1677	29.0386
D_0__Bacteria;D_1__Firmicutes;D_2__Clostridia;D_3__Clostridiales;D_4__Ruminococcaceae;D_5__[Eubacterium] coprostanoligenes group	0	0	0	1.02316	0	0	0	0	0	0	0	0	3.35772	1.51824	7.47896	0.654821	2.78035	0	0	8.13081	11.7366	39.0451	44.1223	31.4649	6.74771	22.4332	24.5969	228.571	149.216	430.766	1248.42	5.17256	47.9498	21.5105	20.7008
D_0__Bacteria;D_1__Bacteroidetes;D_2__Bacteroidia;D_3__Bacteroidales;D_4__Prevotellaceae;D_5__Alloprevotella	1.69547	0	0	0	0	0	0	0	0	0	0	0	0	0	0	0	0	0	0	0	0	0	0	0	0	0	0	303.207	169.564	588.03	813.576	20.2113	107.887	12.1341	46.0018
D_0__Bacteria;D_1__Firmicutes;D_2__Clostridia;D_3__Clostridiales;D_4__Lachnospiraceae;D_5__GCA-900066575	0	0	0	21.9126	107.647	13.5633	5.41284	0	0	0	0	0.895539	4.61687	1.36641	8.15886	0	0	0	0	0	0	0	0	0	0	0	0	326.531	185.39	417.091	953.848	0.670517	0	0	0
D_0__Bacteria;D_1__Actinobacteria;D_2__Coriobacteriia;D_3__Coriobacteriales;D_4__Coriobacteriaceae;D_5__Collinsella	0	0	0	3.15474	22.0067	2.17982	0.682106	1.74971	0	0	0	19.3762	65.8953	29.9092	142.78	0	0	0	0	30.0215	57.0064	150.602	278.31	0	0	0	0	83.965	83.6515	355.553	701.359	0	4.66179	0	0
D_0__Bacteria;D_1__Firmicutes;D_2__Clostridia;D_3__Clostridiales;D_4__Lachnospiraceae;D_5__Lachnospiraceae ND3007 group	0	0	0	6.65053	26.249	1.73002	1.45223	7.40503	1.51457	0	0	6.67583	29.3801	10.6276	36.035	0	0.617856	0	0	56.2902	72.9347	200.803	312.25	38.726	10.1216	11.4902	16.9104	205.248	58.7821	205.127	631.223	0	10.6555	0	2.87511
D_0__Bacteria;D_1__Proteobacteria;D_2__Alphaproteobacteria;D_3__Rhodospirillales;D_4__uncultured;D_5__Azospirillum sp. 47_25	0	0	0	0	0	0	0	0	0	0	0	17.0966	108.706	47.8244	183.574	13.5694	29.3481	15.3883	10.5077	78.1809	122.396	362.561	448.011	228.725	52.6322	102.317	118.372	0	0	0	0	0	0	0	0
D_0__Bacteria;D_1__Proteobacteria;D_2__Deltaproteobacteria;D_3__Desulfovibrionales;D_4__Desulfovibrionaceae;D_5__Bilophila	0	0	0	0	0	0	0	0	0	0	0	2.19814	14.69	3.94741	21.0771	3.23773	5.97261	2.48198	1.67813	46.9085	36.0482	86.4569	135.761	142.802	43.5227	63.4696	49.9624	135.277	47.4779	157.264	701.359	5.26835	27.3048	19.5801	9.20036
D_0__Bacteria;D_1__Firmicutes;D_2__Clostridia;D_3__Clostridiales;D_4__Ruminococcaceae;D_5__Anaerotruncus	0	0	0	0	0	0	0	0	0	0	0	0	0	0	0	0	0	0	0	0	0	0	0	0	0	0	0	167.93	92.6949	328.203	939.821	3.16101	41.9561	4.41242	17.8257
D_0__Bacteria;D_1__Firmicutes;D_2__Clostridia;D_3__Clostridiales;D_4__Christensenellaceae;D_5__Christensenellaceae R-7 group	0	0	0	1.96105	11.4011	1.93762	0	4.78046	0	0	0	9.36245	70.9318	23.0772	123.063	2.21912	10.5035	1.57192	0	0	0	0	0	0	0	0	0	153.936	72.3472	232.477	841.63	0.957882	11.9875	4.41242	7.47529
D_0__Bacteria;D_1__Firmicutes;D_2__Clostridia;D_3__Clostridiales;D_4__Lachnospiraceae;D_5__[Ruminococcus] gauvreauii group	0	0	0	0	0	0	0	0	0	0	0	21.5743	207.339	53.2901	264.483	4.43823	20.4922	6.74273	2.16866	55.0393	67.0664	198.014	410.677	84.7131	26.9909	32.8291	73.022	0	0	0	0	0	0	0	0
D_0__Bacteria;D_1__Firmicutes;D_2__Clostridia;D_3__Clostridiales;D_4__Ruminococcaceae;D_5__Negativibacillus	0	0	0	0	0	0	0	0	0	0	0	0	0	0	0	0	0	0	0	7.50536	14.2516	33.4672	57.6984	18.1528	4.38601	6.56582	9.22383	191.254	101.738	294.015	687.332	4.21468	37.2943	4.41242	9.20036
D_0__Bacteria;D_1__Cyanobacteria;D_2__Melainabacteria;D_3__Gastranaerophilales;D_4__Clostridium sp. CAG:306;D_5__Clostridium sp. CAG:306	0	0	0	0	0	0	0	0	0	0	0	0	0	0	0	0	0	0	0	61.2938	134.971	359.772	522.68	14.5223	0	0	5.38057	65.3061	36.1736	82.0507	154.299	0	0	0	0
D_0__Bacteria;D_1__Firmicutes;D_2__Clostridia;D_3__Clostridiales;D_4__Ruminococcaceae;D_5__Ruminococcaceae UCG-013	0	0	0	0	0	0	0	0	0	0	0	0.814126	3.77744	1.51824	13.5981	1.67343	2.36845	0.910061	0	53.7884	62.0364	209.17	312.25	94.3946	41.8358	53.0737	76.8652	37.3178	33.9128	95.7258	196.38	0	9.32358	2.48198	7.18778
D_0__Bacteria;D_1__Fusobacteria;D_2__Fusobacteriia;D_3__Fusobacteriales;D_4__Fusobacteriaceae;D_5__Fusobacterium	0	0	0	0	0	0	0	0	0	0	0	0	0	0	0	0	0	0	0	83.8099	135.809	248.215	553.226	112.547	41.4984	35.5648	38.4326	0	0	54.7005	0	0	0	0	0
D_0__Bacteria;D_1__Firmicutes;D_2__Negativicutes;D_3__Selenomonadales;D_4__Veillonellaceae;D_5__Veillonella	0	0	0	1.19369	3.71198	1.41861	0	0	0	0	0	0	0	0	0	1.34602	0	0	0	35.6505	82.9947	301.205	268.128	62.9298	19.5684	33.9234	59.1862	382.507	38.4345	0	0	0	0	0	0
D_0__Bacteria;D_1__Firmicutes;D_2__Clostridia;D_3__Clostridiales;D_4__Ruminococcaceae;D_5__Ruminococcaceae UCG-003	0	0	0	0	0	0	0	0	0	0	0	3.01227	13.0112	5.31382	21.757	0	1.13274	0	0	0	0	0	0	0	0	0	0	177.259	51.9996	157.264	743.44	6.99254	10.6555	0	3.16262
D_0__Bacteria;D_1__Firmicutes;D_2__Clostridia;D_3__Clostridiales;D_4__Clostridiaceae 1;D_5__Sarcina	0	0	0	0	0	0	0	0	0	0	0	0	0	0	0	0	0	0	0	0	0	0	0	0	0	0	0	228.571	101.738	184.614	617.196	0.670517	10.6555	5.51552	5.75022
D_0__Bacteria;D_1__Actinobacteria;D_2__Coriobacteriia;D_3__Coriobacteriales;D_4__Eggerthellaceae;D_5__Senegalimassilia	0	0	0	0	0	0	0	0	0	0	0	0	0	0	0	0	0	0	0	0	0	0	0	0	0	0	0	125.948	94.9557	382.903	476.924	0	0	4.68819	0
D_0__Bacteria;D_1__Actinobacteria;D_2__Coriobacteriia;D_3__Coriobacteriales;D_4__Eggerthellaceae;D_5__uncultured	0	0	0	0	0	0	0	0	0	0	0	0	0	0	0	0	0	0	0	0	0	0	0	0	0	0	0	153.936	79.1298	259.827	547.06	1.53261	18.6472	11.8584	2.01258
D_0__Bacteria;D_1__Firmicutes;D_2__Bacilli;D_3__Lactobacillales;D_4__Lactobacillaceae;D_5__Lactobacillus	0	0	0	0	0	0	0	0	0	0	0	29.1457	174.601	75.7599	279.441	15.0973	50.6642	17.5394	7.09977	20.6397	36.8865	189.647	98.4268	15.7324	12.8207	4.37721	23.8282	0	0	0	0	0	0	0	0
D_0__Bacteria;D_1__Firmicutes;D_2__Clostridia;D_3__Clostridiales;D_4__Lachnospiraceae;D_5__Lachnospiraceae FCS020 group	0	0	0	9.46422	16.969	3.07943	2.15633	3.46818	0	0	0	1.79108	6.71544	3.03647	13.5981	0	0	1.03416	0	56.2902	75.4497	239.848	380.131	89.5539	23.9544	35.0177	84.5518	0	0	0	0	0	0	0	0
D_0__Bacteria;D_1__Firmicutes;D_2__Clostridia;D_3__Clostridiales;D_4__Lachnospiraceae;D_5__Marvinbryantia	0	0	0	2.30211	3.18169	0.761208	0.726113	0	0	0	0	3.2565	22.2449	6.07294	25.1565	2.40101	5.76665	0.868695	1.29087	0	0	0	0	0	0	0	0	191.254	126.608	218.802	406.788	2.3947	8.65761	0	2.30009
D_0__Bacteria;D_1__Firmicutes;D_2__Clostridia;D_3__Clostridiales;D_4__Ruminococcaceae;D_5__Ruminococcaceae UCG-004	0	0	0	0.682106	0	0	0	0	0	0	0	5.29182	17.628	11.0831	50.9929	5.27495	10.2976	3.30931	1.26505	5.00358	0	0	0	0	0	0	0	158.601	51.9996	177.777	476.924	5.45993	19.9791	4.68819	6.03774
D_0__Bacteria;D_1__Cyanobacteria;D_2__Melainabacteria;D_3__Gastranaerophilales;__;__	0	0	0	0	0	0	0	0	0	0	0	0	0	0	0	0	0	0	0	0	0	0	0	0	0	0	0	153.936	106.26	218.802	504.978	2.29892	3.99582	4.41242	3.45013
D_0__Bacteria;D_1__Firmicutes;D_2__Clostridia;D_3__Clostridiales;D_4__Ruminococcaceae;D_5__Butyricicoccus	0	0	0	11.7663	17.2342	3.14863	1.89229	1.71847	0	1.17058	0.702349	1.46543	3.77744	3.03647	12.2383	0	1.13274	0.951427	0.77452	29.396	35.2099	217.537	173.095	222.675	52.2948	85.3556	89.9323	0	0	0	0	0.670517	5.99373	0	2.5876
D_0__Bacteria;D_1__Firmicutes;D_2__Clostridia;D_3__Clostridiales;D_4__Ruminococcaceae;D_5__CAG-352	0	0	0	0	0	0	0	0	0	0	0	0	0	0	0	0	0	0	0	0	0	0	0	0	0	0	0	125.948	97.2166	246.152	364.707	9.38724	44.62	6.06707	12.938
D_0__Bacteria;D_1__Firmicutes;D_2__Clostridia;D_3__Clostridiales;D_4__Ruminococcaceae;D_5__Ruminococcus 1	0	0	0	0	0	0.726608	0	0	0	0	0	20.923	104.929	38.5632	116.944	11.4594	50.3552	22.6274	10.6884	5.00358	0	61.3565	23.7582	7.26113	0	100.129	10.7611	37.3178	22.6085	0	140.272	2.01155	16.6492	2.75776	4.31267
D_0__Bacteria;D_1__Firmicutes;D_2__Clostridia;D_3__Clostridiales;D_4__Clostridiaceae 1;D_5__Clostridium sensu stricto 1	0	0	0	0	0	0	0	0	0	0	0	0	0	1.36641	0	0	1.44166	0	0	0	0	0	0	0	0	0	0	125.948	81.3906	184.614	378.734	0	14.6513	8.82483	6.61276
D_0__Bacteria;D_1__Firmicutes;D_2__Clostridia;D_3__Clostridiales;D_4__Lachnospiraceae;D_5__[Eubacterium] eligens group	0	0	0	4.94527	7.68909	1.17641	0	6.3427	0	2.40277	0	0	0	0	0	0	1.02976	0.910061	0	0	0	0	0	0	0	0	0	125.948	65.5647	191.452	322.625	6.22623	43.288	5.23975	16.1006
D_0__Bacteria;D_1__Firmicutes;D_2__Clostridia;D_3__Clostridiales;D_4__Lachnospiraceae;D_5__uncultured	0	0	0	3.24	20.4159	2.14522	0	2.31212	0	0	0	4.88476	24.3435	6.22476	30.5957	0	1.64762	0	0.77452	39.4032	46.1081	114.346	142.549	70.1909	14.845	25.7161	38.4326	37.3178	31.6519	129.914	0	0	3.99582	0	2.01258
D_0__Bacteria;D_1__Firmicutes;D_2__Clostridia;D_3__Clostridiales;D_4__Lachnospiraceae;D_5__Tyzzerella 3	0	0	0	0	0	0	0	0	0	0	0	0	0	0	0	0	0	0	0	64.421	72.0964	150.602	234.188	108.917	32.0516	42.1307	54.5743	0	0	0	0	0	0	0	0
D_0__Bacteria;D_1__Bacteroidetes;D_2__Bacteroidia;D_3__Bacteroidales;D_4__Marinifilaceae;D_5__Butyricimonas	0	0	0	2.81369	5.03768	0.830409	1.2762	3.65565	0	0.826595	0	1.54684	4.19715	2.42918	9.51868	0	5.5607	0.992794	0.671251	20.0143	20.9582	52.9897	67.8805	13.3121	2.3617	6.01867	0	102.624	56.5213	41.0254	308.598	3.54416	7.32567	4.96397	7.7628
D_0__Bacteria;D_1__Firmicutes;D_2__Clostridia;D_3__Clostridiales;D_4__Ruminococcaceae;D_5__Ruminiclostridium 6	0	0	0	1.02316	1.85599	0.622807	0	2.24963	0	0	0	0	0	0	0	0	0	0	0	0	0	0	0	0	0	0	0	107.289	56.5213	109.401	350.679	6.60938	59.9373	9.92794	27.3136
D_0__Bacteria;D_1__Firmicutes;D_2__Clostridia;D_3__Clostridiales;__;__	0	0	0	0	0	0	0	0	0	0	0	0	0	0	0	0	0	0	0	0	0	0	0	0	0	0	0	102.624	74.6081	157.264	294.571	5.74729	35.9624	14.3404	26.7385
D_0__Bacteria;D_1__Firmicutes;D_2__Clostridia;D_3__Clostridiales;D_4__Ruminococcaceae;D_5__Oscillibacter	0	0	0	0	0	0	0	0	0	0	0	0.814126	0	1.67006	0	0	0.617856	0	0.722885	6.25447	13.4133	19.5225	37.3343	26.6241	2.3617	3.28291	0	65.3061	13.5651	68.3756	420.815	0	11.3215	0	4.88769
D_0__Bacteria;D_1__Firmicutes;D_2__Clostridia;D_3__Clostridiales;D_4__Ruminococcaceae;D_5__Ruminiclostridium 9	0	0	0	0	0	0	0	0	0	0	0	0.814126	4.19715	2.73282	10.8785	0	1.54464	0	1.03269	6.87992	11.7366	33.4672	50.9104	12.1019	0	0	0	93.2945	36.1736	68.3756	308.598	1.14946	19.3131	3.86087	6.61276
D_0__Bacteria;D_1__Firmicutes;D_2__Clostridia;D_3__Clostridiales;D_4__Lachnospiraceae;D_5__[Eubacterium] ruminantium group	0	0	0	0	0	0	0	0	0	0	0	0	0	0	0	0	0	0	0	0	0	0	0	0	0	0	0	107.289	81.3906	136.751	294.571	2.49049	22.643	3.30931	13.513
D_0__Bacteria;D_1__Proteobacteria;D_2__Deltaproteobacteria;D_3__Desulfovibrionales;D_4__Desulfovibrionaceae;D_5__Desulfovibrio	0	0	0	1.27895	0	1.24561	0	0.749876	0	0	0	3.17509	21.8252	7.89482	39.4345	1.85533	10.6065	3.72298	0	0	0	0	0	0	0	0	0	55.9767	36.1736	61.538	336.652	0.766305	7.32567	19.3043	8.62534
D_0__Bacteria;D_1__Firmicutes;D_2__Clostridia;D_3__Clostridiales;D_4__Lachnospiraceae;D_5__Lachnospiraceae UCG-010	0	0	0	1.96105	9.27994	0.96881	1.65026	0	0	0	0	5.61747	48.2672	15.9415	70.7102	3.38324	3.50118	2.02695	0	0	0	0	0	0	0	0	0	55.9767	56.5213	68.3756	238.462	0	0	0	0
D_0__Bacteria;D_1__Proteobacteria;D_2__Gammaproteobacteria;D_3__Enterobacteriales;D_4__Enterobacteriaceae;D_5__Escherichia-Shigella	0	0	0	48.8558	85.1103	12.1793	12.2559	26.7456	3.06581	3.22423	5.09599	6.83866	19.3069	7.743	34.6752	3.09221	7.92915	3.76434	1.21341	0	0	0	0	0	0	0	0	0	0	143.589	126.245	0	0	1.93043	0
D_0__Bacteria;D_1__Firmicutes;D_2__Clostridia;D_3__DTU014;D_4__uncultured bacterium;D_5__uncultured bacterium	0	0	0	0	0	0	0	0	0	0	0	0	0	0	0	0	0	0	0	0	0	0	0	0	0	0	0	0	0	0	533.033	0	0	0	0
D_0__Bacteria;D_1__Firmicutes;D_2__Clostridia;D_3__Clostridiales;D_4__Eubacteriaceae;D_5__Eubacterium	0	0	0	0	0	0	0	0	0	0	0	0	0	0	0	0	0	0	0	0	0	0	0	0	0	0	0	46.6472	20.3477	54.7005	364.707	0	5.32776	4.41242	0
D_0__Bacteria;D_1__Bacteroidetes;D_2__Bacteroidia;D_3__Bacteroidales;D_4__Prevotellaceae;D_5__Paraprevotella	0	0	0	0	0	0	0	0	0	0	0	32.8907	105.768	38.2595	223.689	7.05752	45.2064	22.3792	7.1514	0	0	0	0	0	0	0	0	0	0	0	0	0	0	0	0
D_0__Bacteria;D_1__Proteobacteria;D_2__Gammaproteobacteria;D_3__Betaproteobacteriales;D_4__Burkholderiaceae;D_5__Parasutterella	0	0	0	0	0	0	0	0	0	0	0	5.21041	29.7998	12.4495	60.5116	9.49491	24.4053	8.56285	4.07914	8.13081	14.2516	25.1004	64.4865	62.9298	18.8936	46.5079	30.7461	32.6531	0	0	0	1.05367	0	4.41242	1.72507
D_0__Bacteria;D_1__Firmicutes;D_2__Negativicutes;D_3__Selenomonadales;D_4__Veillonellaceae;D_5__Dialister	0	0	0	0.852632	5.8331	0	0	6.93636	0	0	0.813246	0	0	0	0	0	0	0	0	17.5125	19.2816	117.135	108.609	78.6622	19.9058	41.0364	43.0445	0	0	0	0	0	0	0	0
D_0__Bacteria;D_1__Firmicutes;D_2__Clostridia;D_3__Clostridiales;D_4__Ruminococcaceae;D_5__Ruminococcaceae NK4A214 group	0	0	0	0	0	0	0	0	0	0	0	0.732714	4.61687	0.910941	6.11915	0	0	0	0	11.258	13.4133	52.9897	54.3044	13.3121	4.04863	14.7731	16.1417	46.6472	0	82.0507	98.1902	1.6284	7.99164	1.65466	2.01258
D_0__Bacteria;D_1__Firmicutes;D_2__Clostridia;D_3__Clostridiales;D_4__Family XIII;D_5__Mogibacterium	0	0	0	0	0	0	0	0	0	0	0	0	0	0	0	0	0	0	0	0	0	0	0	0	0	0	0	74.6356	31.6519	109.401	196.38	0	5.32776	2.75776	2.30009
D_0__Bacteria;D_1__Proteobacteria;D_2__Alphaproteobacteria;D_3__Rhodospirillales;D_4__uncultured;D_5__gut metagenome	0	0	0	0	0	0	0	0	0	0	0	19.7019	120.039	47.5208	193.093	0	5.76665	0	1.03269	0	0	0	0	0	0	0	0	0	20.3477	0	0	1.24525	4.66179	0	3.16262
D_0__Bacteria;D_1__Firmicutes;D_2__Clostridia;D_3__Clostridiales;D_4__Ruminococcaceae;__	0	0	0	0	0	0	0	0.624897	0	0	0	0	0	0	0	0	0.720832	0	0	0	0	0	23.7582	0	5.73556	0	10.7611	0	0	0	364.707	2.29892	0	2.48198	0
D_0__Bacteria;D_1__Firmicutes;D_2__Clostridia;D_3__Clostridiales;D_4__Lachnospiraceae;D_5__GCA-900066755	0	0	0	0	0	0	0	0	0	0	0	0	0	0	0	0	0	0	0	0	0	0	0	0	0	0	0	55.9767	15.826	88.8883	210.408	0	0	0	0
D_0__Bacteria;D_1__Firmicutes;D_2__Clostridia;D_3__Clostridiales;D_4__Peptostreptococcaceae;D_5__Romboutsia	0	0	0	0	0	0	0	0	0	0	0	0	0	0	0	0	0	0	0	0	0	0	0	0	0	0	0	51.312	24.8694	95.7258	182.353	0	0	0	3.16262
D_0__Bacteria;D_1__Firmicutes;D_2__Clostridia;D_3__Clostridiales;D_4__Ruminococcaceae;D_5__UBA1819	0	0	0	0	0	0	0	0	0	0	0	0	3.35772	0.910941	0	1.23689	0.720832	1.53056	0	0	0	0	0	8.47131	0	0	0	55.9767	27.1302	47.8629	196.38	1.24525	5.99373	0	1.72507
D_0__Bacteria;D_1__Firmicutes;D_2__Erysipelotrichia;D_3__Erysipelotrichales;D_4__Erysipelotrichaceae;D_5__Candidatus Stoquefichus	0	0	0	0	0	0	0	0	0	0	0	0	0	0	0	0	0	0	0	0	0	0	0	0	0	0	0	55.9767	45.217	0	210.408	3.16101	18.6472	0	12.363
D_0__Bacteria;D_1__Firmicutes;D_2__Clostridia;D_3__Clostridiales;D_4__Ruminococcaceae;D_5__Intestinimonas	0	0	0	0	0	0	0	0	0	0	0	0	0	0	0	0	1.02976	0	0	0	0	0	0	0	0	0	0	0	22.6085	95.7258	196.38	0.670517	0	1.93043	3.45013
D_0__Bacteria;D_1__Firmicutes;D_2__Clostridia;D_3__Clostridiales;D_4__Ruminococcaceae;D_5__Ruminococcus 2	0	0	0	0	0	0	0	2.24963	0	0	0	18.155	41.5518	28.391	64.591	22.1548	54.3713	29.5356	11.1273	0	0	0	0	0	0	0	0	0	0	0	0	0	0	0	0
D_0__Bacteria;D_1__Firmicutes;D_2__Clostridia;D_3__Clostridiales;D_4__Lachnospiraceae;D_5__[Ruminococcus] gnavus group	0	0	0	33.1674	45.3391	13.1827	9.13142	52.1476	3.95328	13.2563	5.38643	2.68662	7.13516	5.31382	11.5584	2.98308	3.70713	0	1.75558	4.37813	0	0	0	0	0	0	0	0	0	47.8629	0	0	0	0	0
D_0__Bacteria;D_1__Proteobacteria;D_2__Gammaproteobacteria;D_3__Pasteurellales;D_4__Pasteurellaceae;D_5__Actinobacillus	0	0	0	0	0	0	0	0	0	0	0	0	0	0	0	0	0	0	0	13.7598	9.22163	114.346	40.7283	19.363	5.39817	9.30158	33.0521	0	0	0	0	0	0	0	0
D_0__Bacteria;D_1__Bacteroidetes;D_2__Bacteroidia;D_3__Flavobacteriales;D_4__Flavobacteriaceae;D_5__uncultured	0	0	0	0	0	0	0	0	0	0	0	0	0	0	0	0	0	0	0	0	0	0	0	0	0	0	0	37.3178	13.5651	41.0254	126.245	2.20313	3.99582	7.99751	10.9254
D_0__Bacteria;D_1__Cyanobacteria;D_2__Melainabacteria;D_3__Gastranaerophilales;D_4__gut metagenome;D_5__gut metagenome	0	0	0	0	0	0	0	0	0	0	0	0	0	0	0	0	0	0	0	0	0	0	0	0	0	0	0	51.312	38.4345	68.3756	84.163	0	0	0	0
D_0__Bacteria;D_1__Actinobacteria;D_2__Coriobacteriia;D_3__Coriobacteriales;D_4__Coriobacteriales Incertae Sedis;D_5__uncultured	0	0	0	0	0	0	0	0	0	0	0	0	0	0	0	0	0	0	0	9.3817	14.2516	44.6229	71.2745	21.7834	17.5441	18.6032	22.2909	0	0	0	0	0	0	0	0
D_0__Bacteria;D_1__Firmicutes;D_2__Erysipelotrichia;D_3__Erysipelotrichales;D_4__Erysipelotrichaceae;D_5__[Clostridium] innocuum group	0	0	0	0	0	0	0	0	0	0	0	0	0	0	0	0	1.44166	0	0	0	0	0	0	0	0	0	0	46.6472	20.3477	0	140.272	1.14946	0	1.65466	5.1752
D_0__Bacteria;D_1__Actinobacteria;D_2__Actinobacteria;D_3__Bifidobacteriales;D_4__Bifidobacteriaceae;D_5__Bifidobacterium	0	0	0	0	0	0	0	0	0	0	0	4.23346	24.3435	9.41306	42.834	2.00084	2.5744	2.10969	0	3.75268	8.3833	33.4672	37.3343	7.26113	0	0	0	0	0	0	0	0	0	0	0
D_0__Bacteria;D_1__Firmicutes;D_2__Clostridia;D_3__Clostridiales;D_4__Lachnospiraceae;D_5__Lachnospiraceae UCG-008	0	0	0	2.04632	5.30282	1.14181	0	0	0	0	0	0	5.4563	1.21459	10.8785	0	0	0	0	8.75626	15.0899	39.0451	64.4865	0	0	0	0	0	0	0	0	0	0	0	0
D_0__Bacteria;D_1__Firmicutes;D_2__Bacilli;D_3__Lactobacillales;D_4__Enterococcaceae;D_5__Enterococcus	0	0	0	0	0	0	0	0	0	0	0	0	0	0	0	0	0	0	0	0	0	0	0	0	0	0	0	55.9767	22.6085	68.3756	0	0	0	1.93043	2.01258
D_0__Bacteria;D_1__Proteobacteria;D_2__Gammaproteobacteria;D_3__Pasteurellales;D_4__Pasteurellaceae;__	0	0	0	0	0	0	0	0	0	0	0	0	0	0	0	0	0	0	0	5.00358	0	30.6783	37.3343	16.9426	5.06078	8.75442	43.0445	0	0	0	0	0	0	0	0
D_0__Bacteria;D_1__Bacteroidetes;D_2__Bacteroidia;D_3__Chitinophagales;D_4__Chitinophagaceae;D_5__Sediminibacterium	0	0	0	0	0	0	0	0	0	0	0	0	0	0	0	0	0	0	0	5.00358	5.86831	0	0	29.0445	7.42248	16.4145	13.0671	0	0	0	0	9.67461	14.6513	20.6832	21.2758
D_0__Bacteria;D_1__Proteobacteria;D_2__Gammaproteobacteria;D_3__Pseudomonadales;D_4__Pseudomonadaceae;D_5__Pseudomonas	2.15897	0.982232	0	2.81369	6.89367	1.69542	0	3.99934	1.01216	0	0	0	0	0	0	0.727579	0	0	0	4.37813	6.70664	0	0	22.9936	7.75987	10.943	8.45518	0	0	0	0	14.464	15.3173	12.9615	18.6882
D_0__Bacteria;D_1__Firmicutes;D_2__Clostridia;D_3__Clostridiales;D_4__Lachnospiraceae;D_5__Lachnospiraceae UCG-004	0	0	0	6.48	24.6581	5.84746	2.00231	1.1873	0	0	0	2.44238	14.2703	5.46565	18.3574	0.945853	1.33869	0	0	5.62902	0	16.7336	30.5462	0	0	0	0	0	0	0	0	0	0	0	0
D_0__Bacteria;D_1__Firmicutes;D_2__Clostridia;D_3__Clostridiales;D_4__Lachnospiraceae;D_5__Lactonifactor	0	0	0	0	0	0	0	0	0	0	0	0	0	0	0	0	0	0	0	0	0	0	0	0	0	0	0	0	0	0	98.1902	0	0	0	0
D_0__Bacteria;D_1__Firmicutes;D_2__Erysipelotrichia;D_3__Erysipelotrichales;D_4__Erysipelotrichaceae;D_5__Turicibacter	0	0	0	0	0	0	0	0	0	0	0	0	0	0	0	0	0	0	0	0	0	0	0	0	0	0	0	0	0	0	84.163	0	0	6.8944	0
D_0__Bacteria;D_1__Firmicutes;D_2__Clostridia;D_3__Clostridiales;D_4__Lachnospiraceae;D_5__Sellimonas	0	0	0	0	0	0	0	0	0	0	0	0	0	0	0	0	0	0	0	9.3817	7.54497	30.6783	33.9403	0	2.02431	4.92436	0	0	0	0	0	0	0	0	0
D_0__Bacteria;D_1__Firmicutes;D_2__Bacilli;D_3__Lactobacillales;D_4__Carnobacteriaceae;D_5__Granulicatella	0	0	0	0	0	0	0	0	0	0	0	0	0	0	0	0	0	0	0	0	0	0	0	0	0	0	0	0	0	0	84.163	0	0	0	0
D_0__Bacteria;D_1__Firmicutes;D_2__Bacilli;D_3__Bacillales;D_4__Staphylococcaceae;D_5__Staphylococcus	0	0	0	0	1.85599	0.761208	0	0.624897	1.93263	1.77127	4.39892	0	0	0	0	0	2.26547	1.94422	0	0	0	0	0	0	0	0	0	0	0	0	0	49.5225	0	0	2.01258
D_0__Bacteria;D_1__Firmicutes;D_2__Clostridia;D_3__Clostridiales;D_4__Peptostreptococcaceae;D_5__Intestinibacter	0	0	0	0	0	0	0	0	0	0	0	0	0	0	0	0	0	0	0	0	0	0	0	0	0	0	0	0	24.8694	41.0254	0	0	0	0	0
D_0__Bacteria;D_1__Actinobacteria;D_2__Coriobacteriia;D_3__Coriobacteriales;D_4__Eggerthellaceae;D_5__Adlercreutzia	0	0	0	0	0	0	0	0	0	0	0	0	0	1.67006	6.11915	0	0	0	0	6.87992	5.02998	19.5225	20.3642	0	2.3617	0	0	0	0	0	0	0	0	0	0
D_0__Bacteria;D_1__Firmicutes;D_2__Clostridia;D_3__Clostridiales;D_4__Ruminococcaceae;D_5__Oscillospira	0	0	0	0	0	0	0	0	0	0	0	0	0	0	4.75934	0	0	0	0	6.25447	14.2516	36.2561	0	0	0	0	0	0	0	0	0	0	0	0	0
D_0__Bacteria;D_1__Firmicutes;D_2__Clostridia;D_3__Clostridiales;D_4__Lachnospiraceae;D_5__Lachnospiraceae UCG-001	0	0	0	0	0	0	0	0	0	0	0	0	0	0	0	0	0	0	0	5.00358	9.22163	0	20.3642	8.47131	3.03647	5.47151	6.14922	0	0	0	0	0	0	0	0
D_0__Bacteria;D_1__Firmicutes;D_2__Clostridia;D_3__Clostridiales;D_4__Family XIII;D_5__Family XIII UCG-001	0	0	0	0	0	0	0	0	0	0	0	0	3.35772	0.910941	0	0	0	0	0.671251	0	0	0	0	0	0	0	0	41.9825	0	0	0	0	3.99582	0	4.31267
D_0__Bacteria;D_1__Proteobacteria;D_2__Gammaproteobacteria;D_3__Betaproteobacteriales;D_4__Neisseriaceae;D_5__Neisseria	0	0	0	0	0	0	0	0	0	0	0	0	0	0	0	0	0	0	0	0	5.02998	16.7336	0	0	6.07294	0	4.61191	0	0	0	0	8.52515	0	6.8944	2.01258
D_0__Bacteria;D_1__Firmicutes;D_2__Clostridia;D_3__Clostridiales;D_4__Lachnospiraceae;D_5__[Eubacterium] ventriosum group	0	0	0	0	0	0	0	0	0	0	0	0.976951	8.81402	1.82188	18.3574	0	2.1625	0.827328	0	0	0	0	0	0	0	0	0	0	0	0	0	0.766305	8.65761	2.20621	2.5876
D_0__Bacteria;D_1__Proteobacteria;D_2__Alphaproteobacteria;D_3__Caulobacterales;D_4__Caulobacteraceae;D_5__Brevundimonas	0	0	0	0	0	0	0	0	0	0	0	0	0	0	0	0	0	0	41.1528	0	0	0	0	0	0	0	0	0	0	0	0	1.53261	0	0	0
D_0__Bacteria;D_1__Firmicutes;D_2__Clostridia;D_3__Clostridiales;D_4__Lachnospiraceae;D_5__Coprococcus 2	0	0	0	0	0	0	0	0	0	0	0	1.54684	7.97459	3.79559	21.757	1.3824	2.26547	0	0	0	0	0	0	0	0	0	0	0	0	0	0	0	0	0	0
D_0__Bacteria;D_1__Firmicutes;D_2__Clostridia;D_3__Clostridiales;D_4__Family XIII;D_5__Family XIII AD3011 group	0	0	0	0	2.38627	0	0	0.999835	0	0	0	1.38401	2.51829	2.12553	0	0	0	0	0	0	0	0	20.3642	0	0	0	0	0	0	0	0	0	0	3.30931	0
D_0__Bacteria;D_1__Proteobacteria;D_2__Alphaproteobacteria;D_3__Sphingomonadales;D_4__Sphingomonadaceae;D_5__Sphingomonas	7.20304	5.21129	13.3323	0	0	0	0	0	0	0	0.739315	0	0	0	0	0	0	0.868695	0	0	0	0	0	0	0	0	0	0	0	0	0	0	0	1.65466	2.87511
D_0__Bacteria;D_1__Firmicutes;D_2__Clostridia;D_3__Clostridiales;D_4__Peptococcaceae;D_5__uncultured	0	0	0	0	1.85599	0	0	0	0	0	0	0	0	0	0	0	0	0.703229	0	0	0	0	0	0	0	0	0	27.9883	0	0	0	0	0	0	0
D_0__Bacteria;D_1__Firmicutes;D_2__Clostridia;D_3__Clostridiales;D_4__Ruminococcaceae;D_5__Flavonifractor	0	0	0	0	0	0	0	0	0	0	0	0	0	0	0	0	0.720832	0	0	6.25447	5.02998	0	0	7.26113	3.03647	0	6.14922	0	0	0	0	0	0	0	0
D_0__Bacteria;D_1__Proteobacteria;D_2__Gammaproteobacteria;D_3__Betaproteobacteriales;D_4__Burkholderiaceae;D_5__Oxalobacter	0	0	0	0	0	0	0	0	0	0	0	0	0	0	0	0	0	0	0	0	0	0	0	0	0	0	0	27.9883	0	0	0	0	0	0	0
D_0__Bacteria;D_1__Firmicutes;D_2__Erysipelotrichia;D_3__Erysipelotrichales;D_4__Erysipelotrichaceae;D_5__Erysipelatoclostridium	0	0	0	7.07685	7.42395	1.83382	0.770119	5.7803	0	1.48376	1.80076	0	0	0	0	0	0	0	0	0	0	0	0	0	0	0	0	0	0	0	0	0	0	0	0
D_0__Bacteria;D_1__Firmicutes;D_2__Clostridia;D_3__Clostridiales;D_4__Ruminococcaceae;D_5__Ruminococcaceae UCG-010	0	0	0	0	0	0	0	0	0	0	0	1.05836	6.29573	3.03647	8.15886	1.3824	3.39821	1.36509	1.23923	0	0	0	0	0	0	0	0	0	0	0	0	0	0	0	0
D_0__Bacteria;D_1__Firmicutes;D_2__Clostridia;D_3__Clostridiales;D_4__Lachnospiraceae;D_5__[Eubacterium] xylanophilum group	0	0	0	0	0	0	0	0	0	0	0	1.13978	2.51829	1.67006	8.15886	0	0	0	0	5.00358	0	0	0	7.26113	0	0	0	0	0	0	0	0	0	0	0
D_0__Bacteria;D_1__Proteobacteria;D_2__Gammaproteobacteria;D_3__Xanthomonadales;D_4__Xanthomonadaceae;D_5__Stenotrophomonas	0	0.850212	0	0	0	0	0	0	0	0	0	0	0	0	0	0	0	0	0	0	0	0	0	0	3.37386	0	0	0	0	0	0	1.53261	0	8.82483	10.9254
D_0__Bacteria;D_1__Proteobacteria;D_2__Alphaproteobacteria;D_3__Rhodospirillales;D_4__uncultured;D_5__uncultured organism	0	0	0	2.04632	14.5828	0	0.704109	1.37477	0.726113	0	0	0	0	0	0	0	0	0	0	0	0	0	0	0	0	0	0	0	0	0	0	0	0	0	0
D_0__Bacteria;D_1__Bacteroidetes;D_2__Bacteroidia;D_3__Chitinophagales;D_4__Chitinophagaceae;D_5__Vibrionimonas	0	0	0	0	0	0	0	0	0	0	0	0	0	0	0	0	0	0	0	0	0	0	0	0	2.69909	0	0	0	0	0	0	1.24525	3.99582	3.30931	7.18778
D_0__Bacteria;__;__;__;__;__	0	0	0	1.87579	0	4.22124	0.704109	0	0	0	0	0	0	0	0	0.873095	0	0	0	0	9.22163	0	0	0	0	0	0	0	0	0	0	0	0	0	0
D_0__Bacteria;D_1__Firmicutes;D_2__Erysipelotrichia;D_3__Erysipelotrichales;D_4__Erysipelotrichaceae;D_5__Holdemania	0	0	0	0	0	0	0	0	0	0	0	0	0	0	0	0.618443	1.23571	0.910061	1.11015	0	0	0	0	8.47131	0	0	0	0	0	0	0	0	0	0	4.31267
D_0__Bacteria;D_1__Bacteroidetes;D_2__Bacteroidia;D_3__Bacteroidales;D_4__Prevotellaceae;D_5__Prevotellaceae UCG-001	0	0	0	0	0	0	0	0	0	0	0	0	0	0	0	0	0	0	0	0	0	0	0	0	0	0	0	0	15.826	0	0	0	0	0	0
D_0__Bacteria;D_1__Proteobacteria;D_2__Gammaproteobacteria;D_3__Betaproteobacteriales;D_4__Burkholderiaceae;D_5__Burkholderia-Caballeronia-Paraburkholderia	1.65433	1.04472	3.57643	0	0	1.10721	0	0	0	1.0987	1.55784	0	0	0	0	3.60152	0	0	0.645433	0	0	0	0	0	0	0	0	0	0	0	0	0.957882	0	0	0
D_0__Bacteria;D_1__Firmicutes;D_2__Bacilli;D_3__Lactobacillales;D_4__Streptococcaceae;D_5__Lactococcus	0	0	0	0	0	0	0	0	0	0	0	0	0	0	0	0	0	0	0	0	0	0	0	0	0	0	0	0	13.5651	0	0	0	0	0	0
D_0__Bacteria;D_1__Firmicutes;D_2__Clostridia;D_3__Clostridiales;D_4__Peptococcaceae;D_5__Peptococcus	0	0	0	0	0	0	0	0	0	0	0	0.732714	4.61687	1.97371	6.11915	0	0	0	0	0	0	0	0	0	0	0	0	0	0	0	0	0	0	0	0
Unassigned;__;__;__;__;__	0	0	0	4.00737	6.89367	1.45322	0.792123	0	0	0	0	0	0	0	0	0	0	0	0	0	0	0	0	0	0	0	0	0	0	0	0	0	0	0	0
D_0__Bacteria;D_1__Firmicutes;D_2__Erysipelotrichia;D_3__Erysipelotrichales;D_4__Erysipelotrichaceae;D_5__uncultured	0	0	0	0	0	0	0	0	0	0	0	0	2.51829	0.910941	7.47896	0	2.1625	0	0	0	0	0	0	0	0	0	0	0	0	0	0	0	0	0	0
D_0__Bacteria;D_1__Firmicutes;D_2__Clostridia;D_3__Clostridiales;D_4__Lachnospiraceae;D_5__Hungatella	0	0	0	0	0	0	0	0	0	0	0	0	0	1.51824	0	0	1.02976	1.44782	0	0	0	0	0	8.47131	0	0	0	0	0	0	0	0	0	0	0
D_0__Bacteria;D_1__Firmicutes;D_2__Clostridia;D_3__Clostridiales;D_4__Lachnospiraceae;D_5__Moryella	0	0	0	0	0	0	0	0	0	0	0	0	4.19715	1.21459	6.11915	0	0.926784	0	0	0	0	0	0	0	0	0	0	0	0	0	0	0	0	0	0
D_0__Bacteria;D_1__Actinobacteria;D_2__Actinobacteria;D_3__Corynebacteriales;D_4__Corynebacteriaceae;D_5__Corynebacterium 1	1.117	0	0	0	0	0	1.47423	0	1.46689	0.847131	0	0	0	0	0	0	0	0	0.619616	0	0	0	0	0	0	0	0	0	0	0	0	0.766305	0	0	5.1752
D_0__Bacteria;D_1__Proteobacteria;D_2__Gammaproteobacteria;D_3__Pseudomonadales;D_4__Moraxellaceae;D_5__Acinetobacter	0	0	0	1.10842	0	0	0	0	1.18818	0	1.41526	0	0	0	0	0	0	0	0	0	0	0	0	0	0	0	5.38057	0	0	0	0	0.862094	0	0	0
D_0__Bacteria;D_1__Firmicutes;D_2__Clostridia;D_3__Clostridiales;D_4__Ruminococcaceae;D_5__GCA-900066225	0	0	0	0	0	0	0	0	0	0	0	0	2.93801	0	0	0	2.05952	0	0	0	0	0	0	0	0	3.83006	0	0	0	0	0	0	0	0	0
D_0__Bacteria;D_1__Firmicutes;D_2__Clostridia;D_3__Clostridiales;D_4__Lachnospiraceae;D_5__Eisenbergiella	0	0	0	0	0	0	0	0	0	0	0	0	2.51829	0.910941	0	0.654821	1.02976	0	0	0	0	0	0	0	0	0	0	0	0	0	0	0	0	2.48198	0
D_0__Archaea;D_1__Euryarchaeota;D_2__Methanobacteria;D_3__Methanobacteriales;D_4__Methanobacteriaceae;D_5__Methanobrevibacter	0	0	0	0	5.56796	0	0	0.96859	0	0	0.908301	0	0	0	0	0	0	0	0	0	0	0	0	0	0	0	0	0	0	0	0	0	0	0	0
D_0__Bacteria;D_1__Proteobacteria;D_2__Alphaproteobacteria;D_3__Rhizobiales;D_4__Beijerinckiaceae;D_5__Bosea	0	0	0	0	0	0	0	0	0	0	0	0	0	0	0	0	0	0	0	0	0	0	0	0	3.37386	0	0	0	0	0	0	0	0	2.48198	0
D_0__Bacteria;D_1__Firmicutes;D_2__Erysipelotrichia;D_3__Erysipelotrichales;D_4__Erysipelotrichaceae;D_5__Dielma	0	0	0	0	0	0	0	0	0	0	0	0	0	0	0	0	0.926784	0	0	0	0	0	0	0	0	0	0	0	0	0	0	0.670517	0	0	3.45013
D_0__Bacteria;D_1__Firmicutes;D_2__Clostridia;D_3__Clostridiales;D_4__Ruminococcaceae;D_5__Fournierella	0	0	0	0	0	0	0	0	0	0	0	0	0	0	4.07943	0	0	0.910061	0	0	0	0	0	0	0	0	0	0	0	0	0	0	0	0	0
D_0__Bacteria;D_1__Firmicutes;D_2__Bacilli;D_3__Bacillales;D_4__Planococcaceae;D_5__Domibacillus	0	0	0	0	0	0	0	0	0	0	0	0	0	0	0	0	0	0	4.77621	0	0	0	0	0	0	0	0	0	0	0	0	0	0	0	0
D_0__Bacteria;D_1__Actinobacteria;D_2__Actinobacteria;D_3__Corynebacteriales;D_4__Corynebacteriaceae;D_5__Lawsonella	0	0	0	0	0	0	0	0	0	0	2.12817	0	0	0	0	1.05499	0	0	0	0	0	0	0	0	0	0	0	0	0	0	0	1.53261	0	0	0
D_0__Bacteria;D_1__Proteobacteria;D_2__Gammaproteobacteria;D_3__Betaproteobacteriales;D_4__Burkholderiaceae;__	0	0	0	0	0	0	0	0	0	0	0	0	0	0	0	0	0	0.992794	0	0	0	0	0	0	0	0	0	0	0	0	0	0.766305	0	0	1.72507
D_0__Bacteria;D_1__Spirochaetes;D_2__Spirochaetia;D_3__Spirochaetales;D_4__Spirochaetaceae;D_5__Treponema 2	0	0	0	0	3.44683	0	0	0	0	0	0	0	0	0	0	0	0	0	0	0	0	0	0	0	0	0	0	0	0	0	0	0	0	0	0
D_0__Bacteria;D_1__Proteobacteria;D_2__Gammaproteobacteria;D_3__Pseudomonadales;D_4__Moraxellaceae;D_5__Enhydrobacter	0	0	0	0	0	0	0	0	0	0	2.21266	0	0	0	0	0	0	0	0	0	0	0	0	0	0	0	0	0	0	0	0	1.05367	0	0	0
D_0__Bacteria;D_1__Actinobacteria;D_2__Actinobacteria;D_3__Corynebacteriales;D_4__Corynebacteriaceae;D_5__Corynebacterium	0	1.37477	1.57104	0	0	0	0	0	0	0	0	0	0	0	0	0	0	0	0	0	0	0	0	0	0	0	0	0	0	0	0	0	0	0	0
D_0__Bacteria;D_1__Firmicutes;D_2__Clostridia;D_3__Clostridiales;D_4__Lachnospiraceae;D_5__Shuttleworthia	0	0	0	0	2.12113	0	0	0.812366	0	0	0	0	0	0	0	0	0	0	0	0	0	0	0	0	0	0	0	0	0	0	0	0	0	0	0
D_0__Bacteria;D_1__Firmicutes;D_2__Clostridia;D_3__Clostridiales;D_4__Christensenellaceae;D_5__Catabacter	0	0	0	0	0	0	0	0	0	0	0	0	0	0	0	0	0	0	0	0	0	0	0	0	0	0	0	0	0	0	0	0	0	0	2.87511
D_0__Bacteria;D_1__Cyanobacteria;D_2__Oxyphotobacteria;D_3__Chloroplast;__;__	0	0	2.69542	0	0	0	0	0	0	0	0	0	0	0	0	0	0	0	0	0	0	0	0	0	0	0	0	0	0	0	0	0	0	0	0
D_0__Bacteria;D_1__Firmicutes;D_2__Clostridia;D_3__Clostridiales;D_4__Clostridiales vadinBB60 group;D_5__uncultured bacterium	0	0	0	0	2.65141	0	0	0	0	0	0	0	0	0	0	0	0	0	0	0	0	0	0	0	0	0	0	0	0	0	0	0	0	0	0
D_0__Bacteria;D_1__Firmicutes;D_2__Clostridia;D_3__Clostridiales;D_4__Christensenellaceae;D_5__uncultured	0	0	0	0	0	0	0	1.12481	0	0	0	0	0	0	0	0	0	0	0	0	0	0	0	0	0	0	0	0	0	0	0	1.43682	0	0	0
D_0__Bacteria;D_1__Proteobacteria;D_2__Alphaproteobacteria;D_3__Rhizobiales;D_4__Rhizobiales Incertae Sedis;D_5__Phreatobacter	0.64624	0	0	0	0	0	0	0	0	0	0	0	0	0	0	1.12775	0	0	0	0	0	0	0	0	0	0	0	0	0	0	0	0.766305	0	0	0
D_0__Bacteria;D_1__Bacteroidetes;D_2__Bacteroidia;D_3__Sphingobacteriales;D_4__Sphingobacteriaceae;D_5__Pedobacter	0	0	0	0	0	0	0	0	0	0	0	0	0	0	0	0	0	0	0	0	0	0	0	0	0	0	0	0	0	0	0	0.766305	0	0	1.72507
D_0__Bacteria;D_1__Firmicutes;D_2__Bacilli;D_3__Bacillales;D_4__Family XI;D_5__Gemella	0	0	0	0	0	0	0	0	0	0	0	0	0	0	0	0	0	0	0	0	0	0	0	0	0	0	0	0	0	0	0	0	0	0	2.30009
D_0__Bacteria;D_1__Firmicutes;D_2__Clostridia;D_3__Clostridiales;D_4__Family XIII;D_5__[Eubacterium] nodatum group	0	0	0	0	0	0	0	0	0	0	0	0	0	0	0	0	0	0	0	0	0	0	0	0	0	0	0	0	0	0	0	0	0	0	2.30009
D_0__Bacteria;D_1__Firmicutes;D_2__Clostridia;D_3__Clostridiales;D_4__Family XI;D_5__Anaerococcus	0	0	0	0	0	0	0	0	0	0	2.24963	0	0	0	0	0	0	0	0	0	0	0	0	0	0	0	0	0	0	0	0	0	0	0	0
D_0__Bacteria;D_1__Firmicutes;D_2__Clostridia;D_3__Clostridiales;D_4__Family XI;D_5__Finegoldia	0	0	0	0	0	0.622807	0	0	0	0	0	0	0	0	0	0	0	0	1.62649	0	0	0	0	0	0	0	0	0	0	0	0	0	0	0	0
D_0__Bacteria;D_1__Proteobacteria;D_2__Gammaproteobacteria;D_3__Betaproteobacteriales;D_4__Burkholderiaceae;D_5__Comamonas	0	0	0	0	0	0	0	0	0	0	1.00864	0	0	0	0	1.05499	0	0	0	0	0	0	0	0	0	0	0	0	0	0	0	0	0	0	0
D_0__Bacteria;D_1__Proteobacteria;D_2__Alphaproteobacteria;D_3__Rhizobiales;D_4__Beijerinckiaceae;D_5__Methylobacterium	0	0	0	0	0	0	0	0	0	0	0	0	0	0	0	0.873095	0	1.15826	0	0	0	0	0	0	0	0	0	0	0	0	0	0	0	0	0
D_0__Bacteria;D_1__Bacteroidetes;D_2__Bacteroidia;D_3__Flavobacteriales;D_4__Weeksellaceae;D_5__Cloacibacterium	0	0.805325	0	0	0	0	0	0	0	0	1.11953	0	0	0	0	0	0	0	0	0	0	0	0	0	0	0	0	0	0	0	0	0	0	0	0
D_0__Bacteria;D_1__Tenericutes;D_2__Mollicutes;D_3__Izimaplasmatales;D_4__uncultured organism;D_5__uncultured organism	0	0	0	0	0	0	0	0	0	0	0	0	0	0.910941	0	0	0	0.951427	0	0	0	0	0	0	0	0	0	0	0	0	0	0	0	0	0
D_0__Bacteria;D_1__Firmicutes;D_2__Bacilli;D_3__Bacillales;D_4__Bacillaceae;D_5__Bacillus	0	0	1.72969	0	0	0	0	0	0	0	0	0	0	0	0	0	0	0	0	0	0	0	0	0	0	0	0	0	0	0	0	0	0	0	0
D_0__Bacteria;D_1__Proteobacteria;D_2__Gammaproteobacteria;D_3__Gammaproteobacteria Incertae Sedis;D_4__Unknown Family;D_5__Acidibacter	0	0	0	0	0	0	0	0	0	0	0	0	0	0	0	0	0	0	0	0	0	0	0	0	0	0	0	0	0	0	0	1.72419	0	0	0
D_0__Bacteria;D_1__Firmicutes;D_2__Bacilli;D_3__Bacillales;D_4__Listeriaceae;D_5__Brochothrix	0	0	0	0	0	0	0	0	0	0	0	0	0	0	0	0	1.64762	0	0	0	0	0	0	0	0	0	0	0	0	0	0	0	0	0	0
D_0__Bacteria;D_1__Firmicutes;D_2__Bacilli;D_3__Lactobacillales;D_4__Carnobacteriaceae;D_5__Atopostipes	0	1.02184	0.622256	0	0	0	0	0	0	0	0	0	0	0	0	0	0	0	0	0	0	0	0	0	0	0	0	0	0	0	0	0	0	0	0
D_0__Bacteria;D_1__Firmicutes;D_2__Clostridia;D_3__Clostridiales;D_4__Defluviitaleaceae;D_5__Defluviitaleaceae UCG-011	0	0	0	0	0	0	0	0	0	0	0	0	0	0	0	1.3824	0	0	0	0	0	0	0	0	0	0	0	0	0	0	0	0	0	0	0
D_0__Bacteria;D_1__Proteobacteria;D_2__Gammaproteobacteria;D_3__Pseudomonadales;D_4__Moraxellaceae;D_5__Psychrobacter	0	0	0	0	0	0	0	0	0	0	0	0	0	0	0	0	1.33869	0	0	0	0	0	0	0	0	0	0	0	0	0	0	0	0	0	0
D_0__Bacteria;D_1__Firmicutes;D_2__Clostridia;D_3__Clostridiales;D_4__Clostridiales vadinBB60 group;D_5__uncultured organism	0	0	0	0	0	0	0	0	0	0	0	0	0	0	0	0	1.33869	0	0	0	0	0	0	0	0	0	0	0	0	0	0	0	0	0	0
D_0__Bacteria;D_1__Firmicutes;D_2__Bacilli;D_3__Bacillales;D_4__Bacillaceae;D_5__Anoxybacillus	0	0	0	0	0	0	0	0	0	0	0	0	0	0	0	0	0	1.28236	0	0	0	0	0	0	0	0	0	0	0	0	0	0	0	0	0
D_0__Bacteria;D_1__Proteobacteria;D_2__Gammaproteobacteria;D_3__Vibrionales;D_4__Vibrionaceae;D_5__Vibrio	0	0	0	0	0	0	0	0	0	0	0	0	0	0	0	0	0	0	0	0	0	0	0	0	0	0	0	0	0	0	0	1.14946	0	0	0
D_0__Bacteria;D_1__Entotheonellaeota;D_2__Entotheonellia;D_3__Entotheonellales;D_4__Entotheonellaceae;D_5__uncultured bacterium	0	0	0	1.10842	0	0	0	0	0	0	0	0	0	0	0	0	0	0	0	0	0	0	0	0	0	0	0	0	0	0	0	0	0	0	0
D_0__Bacteria;D_1__Firmicutes;D_2__Clostridia;D_3__Clostridiales;D_4__Clostridiales vadinBB60 group;D_5__gut metagenome	0	0	0	0	0	0	0	0	0	0	0	0	0	1.06276	0	0	0	0	0	0	0	0	0	0	0	0	0	0	0	0	0	0	0	0	0
D_0__Bacteria;D_1__Firmicutes;D_2__Clostridia;D_3__Clostridiales;D_4__Ruminococcaceae;D_5__Candidatus Soleaferrea	0	0	0	0	0	0	0	0	0	0	0	0	0	0	0	0	0	0	0	0	0	0	0	0	0	0	0	0	0	0	0	0.957882	0	0	0
D_0__Bacteria;D_1__Firmicutes;D_2__Clostridia;D_3__Clostridiales;D_4__Ruminococcaceae;D_5__Ruminiclostridium	0	0	0	0	0	0	0	0	0	0	0	0	0	0	0	0	0.926784	0	0	0	0	0	0	0	0	0	0	0	0	0	0	0	0	0	0
D_0__Bacteria;D_1__Firmicutes;D_2__Bacilli;D_3__Lactobacillales;D_4__Carnobacteriaceae;D_5__Alloiococcus	0	0	0	0	0	0	0	0	0	0	0	0	0	0	0	0	0.926784	0	0	0	0	0	0	0	0	0	0	0	0	0	0	0	0	0	0
D_0__Bacteria;D_1__Firmicutes;D_2__Clostridia;D_3__Clostridiales;D_4__Ruminococcaceae;D_5__Angelakisella	0	0	0	0	0	0	0	0	0	0	0	0	0	0	0	0	0.926784	0	0	0	0	0	0	0	0	0	0	0	0	0	0	0	0	0	0
D_0__Bacteria;D_1__Firmicutes;D_2__Erysipelotrichia;D_3__Erysipelotrichales;D_4__Erysipelotrichaceae;D_5__Faecalitalea	0	0	0	0	0	0	0	0.9061	0	0	0	0	0	0	0	0	0	0	0	0	0	0	0	0	0	0	0	0	0	0	0	0	0	0	0
D_0__Bacteria;D_1__Bacteroidetes;D_2__Bacteroidia;D_3__Chitinophagales;D_4__Chitinophagaceae;D_5__Chitinophaga	0	0	0	0	0	0	0	0	0	0	0	0	0	0	0	0	0	0	0	0	0	0	0	0	0	0	0	0	0	0	0	0.862094	0	0	0
D_0__Bacteria;D_1__Proteobacteria;D_2__Gammaproteobacteria;D_3__Oceanospirillales;D_4__Halomonadaceae;D_5__Halomonas	0	0	0	0	0	0	0	0	0	0	0	0	0	0	0	0	0	0	0	0	0	0	0	0	0	0	0	0	0	0	0	0.862094	0	0	0
D_0__Bacteria;D_1__Actinobacteria;D_2__Coriobacteriia;D_3__Coriobacteriales;D_4__Eggerthellaceae;D_5__Eggerthella	0	0	0	0.852632	0	0	0	0	0	0	0	0	0	0	0	0	0	0	0	0	0	0	0	0	0	0	0	0	0	0	0	0	0	0	0
D_0__Bacteria;D_1__Proteobacteria;D_2__Gammaproteobacteria;D_3__Salinisphaerales;D_4__Solimonadaceae;D_5__Nevskia	0	0	0.793223	0	0	0	0	0	0	0	0	0	0	0	0	0	0	0	0	0	0	0	0	0	0	0	0	0	0	0	0	0	0	0	0
D_0__Bacteria;D_1__Actinobacteria;D_2__Actinobacteria;D_3__Corynebacteriales;D_4__Corynebacteriaceae;D_5__Turicella	0	0	0	0.767369	0	0	0	0	0	0	0	0	0	0	0	0	0	0	0	0	0	0	0	0	0	0	0	0	0	0	0	0	0	0	0
D_0__Bacteria;D_1__Fusobacteria;D_2__Fusobacteriia;D_3__Fusobacteriales;D_4__Leptotrichiaceae;D_5__Leptotrichia	0	0	0	0	0	0	0	0	0	0	0	0	0	0	0	0	0	0	0	0	0	0	0	0	0	0	0	0	0	0	0	0.766305	0	0	0
D_0__Bacteria;D_1__Proteobacteria;D_2__Alphaproteobacteria;D_3__Caulobacterales;D_4__Caulobacteraceae;D_5__uncultured	0	0	0	0	0	0	0	0	0	0	0	0	0	0	0	0	0	0	0	0	0	0	0	0	0	0	0	0	0	0	0	0.766305	0	0	0
D_0__Bacteria;D_1__Proteobacteria;D_2__Deltaproteobacteria;D_3__Myxococcales;D_4__Polyangiaceae;D_5__Pajaroellobacter	0	0	0	0	0	0	0	0	0	0	0	0	0	0	0	0	0	0	0	0	0	0	0	0	0	0	0	0	0	0	0	0.766305	0	0	0
D_0__Bacteria;D_1__Bacteroidetes;D_2__Bacteroidia;D_3__Bacteroidales;D_4__Porphyromonadaceae;D_5__Porphyromonas	0.763628	0	0	0	0	0	0	0	0	0	0	0	0	0	0	0	0	0	0	0	0	0	0	0	0	0	0	0	0	0	0	0	0	0	0
D_0__Bacteria;D_1__Acidobacteria;D_2__Subgroup 6;D_3__Unknown Order;D_4__Unknown Family;D_5__Luteitalea	0	0	0	0	0	0	0	0	0	0.73418	0	0	0	0	0	0	0	0	0	0	0	0	0	0	0	0	0	0	0	0	0	0	0	0	0
D_0__Bacteria;D_1__Firmicutes;D_2__Clostridia;D_3__Clostridiales;D_4__Lachnospiraceae;D_5__Lachnospiraceae NK4B4 group	0	0	0	0	0	0	0	0	0	0	0	0.732714	0	0	0	0	0	0	0	0	0	0	0	0	0	0	0	0	0	0	0	0	0	0	0
D_0__Bacteria;D_1__Bacteroidetes;D_2__Bacteroidia;D_3__Flavobacteriales;D_4__Flavobacteriaceae;D_5__Capnocytophaga	0	0	0	0	0	0	0.704109	0	0	0	0	0	0	0	0	0	0	0	0	0	0	0	0	0	0	0	0	0	0	0	0	0	0	0	0
D_0__Bacteria;D_1__Synergistetes;D_2__Synergistia;D_3__Synergistales;D_4__Synergistaceae;D_5__Cloacibacillus	0	0	0	0	0	0	0.682106	0	0	0	0	0	0	0	0	0	0	0	0	0	0	0	0	0	0	0	0	0	0	0	0	0	0	0	0
D_0__Bacteria;D_1__Proteobacteria;D_2__Gammaproteobacteria;D_3__Betaproteobacteriales;D_4__Neisseriaceae;D_5__Kingella	0	0	0	0	0	0	0	0	0	0	0	0	0	0	0	0	0	0	0	0	0	0	0	0	0	0	0	0	0	0	0	0.670517	0	0	0
D_0__Bacteria;D_1__Proteobacteria;D_2__Gammaproteobacteria;D_3__Cellvibrionales;D_4__Cellvibrionaceae;D_5__Cellvibrio	0.64503	0	0	0	0	0	0	0	0	0	0	0	0	0	0	0	0	0	0	0	0	0	0	0	0	0	0	0	0	0	0	0	0	0	0
D_0__Bacteria;D_1__Actinobacteria;D_2__Actinobacteria;D_3__Corynebacteriales;D_4__Nocardiaceae;D_5__Gordonia	0	0	0	0	0	0	0	0	0	0	0.638979	0	0	0	0	0	0	0	0	0	0	0	0	0	0	0	0	0	0	0	0	0	0	0	0
D_0__Bacteria;D_1__Firmicutes;D_2__Bacilli;D_3__Lactobacillales;D_4__Aerococcaceae;D_5__Aerosphaera	0	0	0	0	0	0.622807	0	0	0	0	0	0	0	0	0	0	0	0	0	0	0	0	0	0	0	0	0	0	0	0	0	0	0	0	0

## Sheet: Table_S5
taxonomy	Biopsy_Blank_1	Biopsy_Blank_2	Biopsy_Blank_3	CT15_Cntrl_1	CT15_Cntrl_2	CT15_Cntrl_3	CT15_Cntrl_4	CT15_MEM_1	CT15_MEM_2	CT15_MEM_3	CT15_MEM_4	CT17_Cntrl_1	CT17_Cntrl_2	CT17_Cntrl_3	CT17_Cntrl_4	CT17_MEM_1	CT17_MEM_2	CT17_MEM_3	CT17_MEM_4	CT18_Cntrl_1	CT18_Cntrl_2	CT18_Cntrl_3	CT18_Cntrl_4	CT18_MEM_1	CT18_MEM_2	CT18_MEM_3	CT18_MEM_4	CT19_Cntrl_1	CT19_Cntrl_2	CT19_Cntrl_3	CT19_Cntrl_4	CT19_MEM_1	CT19_MEM_2	CT19_MEM_3	CT19_MEM_4
D_0__Bacteria;D_1__Firmicutes;D_2__Clostridia;D_3__Clostridiales;D_4__Lachnospiraceae;D_5__Blautia	0	0	0	13.5651	14.3517	15.947	10.7707	17.3717	19.165	16.9921	13.114	9.94004	10.5066	8.98289	7.17861	6.60652	6.49651	6.03444	3.8671	10.4296	10.5066	10.5396	11.8213	6.13345	6.62303	8.03124	6.89807	38.8195	37.9944	38.4565	34.3143	27.0367	39.9857	41.3334	35.9756
D_0__Bacteria;D_1__Firmicutes;D_2__Clostridia;D_3__Clostridiales;D_4__Lachnospiraceae;D_5__Anaerostipes	0	0	0	40.8053	38.2639	27.0312	43.3962	9.34045	8.84537	11.5078	9.23043	1.01766	1.40822	1.46323	1.38071	0.495077	0.495077	1.05066	0.429067	0.280543	0.308048	0.374058	0.418065	0.269542	0.225535	0.401562	0.25854	16.7556	13.7796	16.244	14.3517	4.01562	4.71973	14.0877	4.14214
D_0__Bacteria;D_1__Bacteroidetes;D_2__Bacteroidia;D_3__Bacteroidales;D_4__Bacteroidaceae;D_5__Bacteroides	0	0	0	11.3813	13.6476	17.2012	12.773	18.5819	11.1117	9.08741	4.32917	25.2764	15.5784	21.4863	18.1858	19.6435	20.5677	20.5072	22.625	16.5686	18.4004	15.4959	14.8413	26.7396	24.9189	16.365	18.6149	6.77705	7.7672	6.35899	8.16877	8.26228	5.63837	3.8616	9.09291
D_0__Bacteria;D_1__Verrucomicrobia;D_2__Verrucomicrobiae;D_3__Verrucomicrobiales;D_4__Akkermansiaceae;D_5__Akkermansia	0	0	0	0.0440068	0.121019	0.379559	0	0.808625	1.03966	0	0	0	0	0	0.0495077	0	0.0770119	0	0	0.379559	0.368557	0.51708	0.390561	1.35871	1.05066	1.34771	1.40272	11.2162	11.2437	11.8433	13.136	25.6505	25.8155	18.4939	23.0706
D_0__Bacteria;D_1__Firmicutes;D_2__Clostridia;D_3__Clostridiales;D_4__Ruminococcaceae;D_5__Faecalibacterium	0	0	0	9.6485	10.3856	10.9687	8.30629	1.14418	0	0	1.01216	7.23362	8.93338	8.76286	12.0029	6.34248	4.40618	5.59987	5.95192	9.49447	8.91138	9.35695	9.58799	6.19396	5.23131	6.73854	7.83872	3.2565	3.77358	4.03212	4.05963	2.5964	1.68326	0.506078	2.5579
D_0__Bacteria;D_1__Firmicutes;D_2__Clostridia;D_3__Clostridiales;D_4__Lachnospiraceae;D_5__[Ruminococcus] torques group	0	0	0	0.269542	1.50173	1.12767	0.770119	3.2235	3.92761	0.731613	2.78343	5.50085	7.27763	5.50635	5.33033	4.75824	5.08829	4.45019	3.01997	6.73854	5.1433	5.8144	6.85406	4.38968	4.98927	6.94758	5.70438	1.9583	2.18934	2.27185	1.68326	0.726113	1.01216	0.660102	0.83613
D_0__Bacteria;D_1__Firmicutes;D_2__Clostridia;D_3__Clostridiales;D_4__Lachnospiraceae;D_5__Agathobacter	0	0	0	0	0.121019	0	0	0	0	0	0	2.31036	2.5634	2.73942	2.42588	1.9033	4.34567	2.10133	1.3092	3.74608	2.69542	2.84394	3.63056	2.63491	4.04313	2.92095	2.51389	3.08598	3.94411	2.67341	2.12333	1.33121	1.41922	0.671104	1.55674
D_0__Bacteria;D_1__Firmicutes;D_2__Negativicutes;D_3__Selenomonadales;D_4__Acidaminococcaceae;D_5__Phascolarctobacterium	0	0	0	0.13202	0.0330051	0	0	0.209032	0	0.759118	0	2.18384	1.22669	2.22234	1.9528	4.05413	2.95946	3.36652	2.37087	1.08917	1.54574	1.21569	1.39722	1.61725	1.68876	1.65576	1.05066	2.03532	2.13433	2.62391	2.37637	2.83844	2.31586	4.91226	1.58975
D_0__Bacteria;D_1__Proteobacteria;D_2__Gammaproteobacteria;D_3__Enterobacteriales;D_4__Enterobacteriaceae;__	0	0	0	0	0	0	0	0	0	0	0	0	0	0	0	0	0	0	0	7.64619	8.90038	9.09841	7.56917	3.11348	5.1598	4.98927	8.79586	0	0	0	0	0	0	0	0
D_0__Bacteria;D_1__Firmicutes;D_2__Clostridia;D_3__Clostridiales;D_4__Ruminococcaceae;D_5__Subdoligranulum	0	0	0	2.64041	2.45888	3.53705	2.00231	6.14445	3.35552	5.11579	2.31586	2.99796	3.94411	3.08598	4.11464	4.78574	3.8946	4.98927	5.01678	3.59756	3.40503	2.94846	3.42153	2.96496	3.54805	3.78459	2.62391	1.00666	1.09467	1.00666	1.14418	1.12767	1.00116	1.39722	1.2597
D_0__Bacteria;D_1__Bacteroidetes;D_2__Bacteroidia;D_3__Bacteroidales;D_4__Rikenellaceae;D_5__Alistipes	0	0	0	0.803124	0.32455	0.599593	0.335552	1.74927	6.33698	2.64041	3.53155	2.16734	1.99681	2.27185	2.00231	5.91342	6.33698	5.88591	6.21046	2.42588	2.16184	1.98581	1.73277	2.13433	3.30051	3.59206	1.9473	1.16618	1.21019	0.83613	1.15518	4.5327	2.28835	2.10133	3.83409
D_0__Bacteria;D_1__Firmicutes;D_2__Clostridia;D_3__Clostridiales;D_4__Lachnospiraceae;D_5__Lachnoclostridium	0	0	0	0.467572	0.220034	0.308048	0	1.59525	1.54574	1.3092	0	0.880136	0.957148	0.792123	0.45107	1.10567	0.649101	0.753617	1.32571	0.742615	0.638099	0.693107	0.863634	0.96815	0.995654	0.792123	0.863634	1.01766	1.15518	1.18268	1.21569	0.676605	0.858133	1.05616	0.869135
D_0__Bacteria;D_1__Bacteroidetes;D_2__Bacteroidia;D_3__Bacteroidales;D_4__Tannerellaceae;D_5__Parabacteroides	0	0	0	0	0	0	0	0	0	0	0	3.00897	2.72842	2.63491	2.82194	5.69888	6.60102	6.50751	5.41834	1.74377	1.43022	1.43022	1.21019	4.83525	3.93311	3.52055	2.92095	0.38506	0.599593	0.363056	0.57759	1.52374	0.748116	0.77562	0.814126
D_0__Bacteria;D_1__Firmicutes;D_2__Clostridia;D_3__Clostridiales;D_4__Lachnospiraceae;__	0	0	0	0.742615	0.726113	0.77562	0.698608	1.09467	2.00781	1.33671	4.16965	0.330051	0.401562	0.319049	0.308048	0.253039	0.308048	0.264041	0.148523	2.5689	1.82628	2.05182	2.29386	3.27301	3.36652	3.41603	2.00231	0.412564	0.511579	0.412564	0.621596	0.346554	0.291545	0.407063	0.484075
D_0__Bacteria;D_1__Firmicutes;D_2__Negativicutes;D_3__Selenomonadales;D_4__Veillonellaceae;D_5__Megamonas	0	0	0	0	0	0	0	0	0	0	0	0	0	0	0	0	0	0	0	3.76258	4.80775	3.63056	4.16415	3.2565	2.19484	2.72842	2.90995	0	0	0	0	0	0	0	0
D_0__Bacteria;D_1__Firmicutes;D_2__Bacilli;D_3__Lactobacillales;D_4__Streptococcaceae;D_5__Streptococcus	0	0	0	0.32455	0.286044	0.269542	0.19253	0.984653	1.01766	0.770119	1.84829	0.0990153	0.0660102	0.143022	0	0.181528	0.335552	0	0.225535	3.2565	3.2455	4.44469	3.36102	1.73277	1.9198	2.15633	3.14649	0.137521	0	0.0495077	0.148523	0.341053	0.13202	0.0550085	0.0330051
D_0__Bacteria;D_1__Firmicutes;D_2__Clostridia;D_3__Clostridiales;D_4__Lachnospiraceae;D_5__Dorea	0	0	0	2.23335	2.41487	1.75477	1.85379	2.82194	2.5909	4.48319	8.05875	3.68557	6.56802	4.01012	6.51301	2.13983	2.32136	1.46323	2.86594	2.42588	2.44238	2.11783	3.05297	2.98696	1.79878	2.37087	2.66791	0	0	0	0	0	0	0	0
D_0__Bacteria;D_1__Firmicutes;D_2__Clostridia;D_3__Clostridiales;D_4__Lachnospiraceae;D_5__Lachnospira	0	0	0	0	0	0	0	0	0	0	0	0	0	0	0	0.159525	0	0	0	2.04632	1.74927	2.10683	1.64475	4.68673	3.93861	3.44353	3.59756	0.0715111	0.0495077	0.0550085	0.0440068	0	0.0660102	0	0
D_0__Bacteria;D_1__Firmicutes;D_2__Clostridia;D_3__Clostridiales;D_4__Ruminococcaceae;D_5__Ruminococcaceae UCG-002	0	0	0	0.390561	0.808625	0.544584	0.555586	0.621596	0.990153	0	0	1.02866	1.2707	1.18818	1.44122	1.32571	1.07267	0.528082	0.203532	0.280543	0.269542	0.231036	0.264041	0.143022	0.137521	0.0990153	0.176027	0.6436	0.599593	0.58309	0.891138	0.418065	0.649101	0.407063	0.308048
D_0__Bacteria;D_1__Proteobacteria;D_2__Gammaproteobacteria;D_3__Betaproteobacteriales;D_4__Burkholderiaceae;D_5__Sutterella	0	0	0	0	0.0440068	0	0	0.148523	0	0	0	0	0	0	0.0440068	0	0	0	0	0.352055	0.374058	0.407063	0.423566	1.19369	1.05616	1.14418	0.984653	0.58309	0.638099	0.572089	0.764619	1.22669	0.742615	0.363056	0.940646
D_0__Bacteria;D_1__Firmicutes;D_2__Clostridia;D_3__Clostridiales;D_4__Lachnospiraceae;D_5__Lachnospiraceae NK4A136 group	0	0	0	0.335552	0.247538	0.456571	0.187029	1.03416	0	1.01766	0	1.63925	1.52924	1.43022	0.803124	2.73392	2.12333	2.00231	1.40822	0.187029	0.19253	0.115518	0.12652	0.0495077	0.0990153	0	0.209032	0.759118	0.671104	0.627097	0.555586	0.610595	0.308048	0.220034	0.511579
D_0__Bacteria;D_1__Firmicutes;D_2__Clostridia;D_3__Clostridiales;D_4__Lachnospiraceae;D_5__Coprococcus 1	0	0	0	0.269542	0.665603	0.32455	0	0.863634	0	1.2597	0	0.720612	1.05066	0.935145	1.12217	0.506078	0.561087	0.544584	0.786622	0.390561	0.522581	0.38506	0.627097	0.357555	0.352055	0.390561	0.253039	0.511579	0.374058	0.555586	0.500578	0.242038	0.225535	0.137521	0.291545
D_0__Bacteria;D_1__Firmicutes;D_2__Negativicutes;D_3__Selenomonadales;D_4__Veillonellaceae;D_5__Megasphaera	0	0	0	0	0	0	0	0	0	0	0	0	0	0	0	0	0	0	0	1.49073	1.79878	2.06832	1.82628	1.87029	1.66676	2.26635	2.08482	0	0	0	0	0	0	0	0
D_0__Bacteria;D_1__Firmicutes;D_2__Clostridia;D_3__Clostridiales;D_4__Lachnospiraceae;D_5__Roseburia	0	0	0	0.247538	0.220034	0.533583	0.154024	0	0	0	0	0.896639	1.57324	1.33121	1.36971	0.32455	0.0330051	0.0880136	0	1.2707	0.946147	1.34771	1.23219	0.0935145	0.12652	0.154024	0.253039	0.242038	0.341053	0.379559	0.247538	0.0605094	0.038506	0	0.038506
D_0__Bacteria;D_1__Firmicutes;D_2__Clostridia;D_3__Clostridiales;D_4__Lachnospiraceae;D_5__CAG-56	0	0	0	0	0	0	0	0	0	0	0	1.99681	2.54689	2.52489	3.207	1.74927	1.99131	1.88679	1.71627	1.2927	1.09467	1.12767	1.16618	1.36971	1.02866	1.77678	1.63925	0.0660102	0.0440068	0.038506	0.0880136	0	0.0440068	0	0.0880136
D_0__Bacteria;D_1__Firmicutes;D_2__Erysipelotrichia;D_3__Erysipelotrichales;D_4__Erysipelotrichaceae;D_5__Erysipelotrichaceae UCG-003	0	0	0	0.550085	0.528082	0.731613	0.610595	2.00231	1.9143	1.9198	0	0.19253	0.605094	0.506078	0.913142	1.01216	0.880136	0.720612	0.984653	1.82078	1.50723	1.72177	1.72177	1.35871	1.77678	1.82628	1.47423	0	0	0	0	0	0	0	0
D_0__Bacteria;D_1__Firmicutes;D_2__Clostridia;D_3__Clostridiales;D_4__Ruminococcaceae;D_5__uncultured	0	0	0	0	0	0	0	0.121019	0	0	0	0.220034	0.104516	0.220034	0.115518	0.143022	0.0440068	0.187029	0	1.2597	1.46323	1.2817	1.23769	2.15083	2.07932	2.84394	2.48639	0.0825128	0	0.0495077	0.0715111	0.038506	0.137521	0.0605094	0.121019
D_0__Bacteria;D_1__Firmicutes;D_2__Negativicutes;D_3__Selenomonadales;D_4__Acidaminococcaceae;D_5__Acidaminococcus	0	0	0	0	0	0	0	0	0	0	0	0	0	0	0	0	0	0	0	1.24319	1.39172	1.08367	1.18268	0.935145	0.847131	1.39722	1.20469	0.154024	0.187029	0.220034	0.198031	0.159525	0.143022	0.143022	0.181528
D_0__Bacteria;D_1__Bacteroidetes;D_2__Bacteroidia;D_3__Bacteroidales;D_4__Marinifilaceae;D_5__Odoribacter	0	0	0	0	0	0	0	0	0	0	0	0.874636	0.742615	0.649101	0.957148	0.858133	1.03966	0.83613	0.352055	0.440068	0.440068	0.346554	0.32455	0.313549	0.363056	0.242038	0.313549	0.242038	0.297046	0.253039	0.544584	0.605094	0.445569	0.286044	0.280543
D_0__Bacteria;D_1__Proteobacteria;D_2__Gammaproteobacteria;D_3__Pasteurellales;D_4__Pasteurellaceae;D_5__Haemophilus	0	0	0	0	0	0	0	0.280543	0	0	0	0	0	0.038506	0	0.121019	0	0.0825128	0	0.440068	0.726113	2.97596	0.616095	0.885637	1.01766	1.36971	3.43253	0	0	0.0330051	0	0	0	0	0
D_0__Bacteria;D_1__Firmicutes;D_2__Clostridia;D_3__Clostridiales;D_4__Lachnospiraceae;D_5__Fusicatenibacter	0	0	0	1.16618	0.742615	0.797624	1.65026	0.418065	0	1.2817	0	4.24666	4.03763	3.41053	2.48088	1.89779	1.52924	2.09032	2.05732	0.957148	0.731613	0.715111	0.84163	0.38506	0.489576	0.561087	0.533583	0.13202	0.0880136	0.12652	0.13202	0.0825128	0.0825128	0.0495077	0.110017
D_0__Bacteria;D_1__Firmicutes;D_2__Erysipelotrichia;D_3__Erysipelotrichales;D_4__Erysipelotrichaceae;D_5__Holdemanella	0	0	0	0	0	0	0	0	0	0	0	0	0	0	0	0	0	0	0	0	0	0	0	0	0	0	0	0.390561	0.38506	0.242038	0.77562	0.297046	0.51708	0.511579	0.803124
D_0__Bacteria;D_1__Firmicutes;D_2__Clostridia;D_3__Clostridiales;D_4__Ruminococcaceae;D_5__Ruminiclostridium 5	0	0	0	0.275043	0.242038	0.533583	0.58309	1.00666	0	0	2.33786	0.253039	0.247538	0.286044	0.390561	0.528082	0.45107	0.38506	0.566588	0	0.0660102	0.0330051	0.0550085	0.0330051	0.115518	0.0330051	0.0715111	0.429067	0.456571	0.445569	0.522581	0.610595	0.478574	0.610595	0.500578
D_0__Bacteria;D_1__Firmicutes;D_2__Clostridia;D_3__Clostridiales;D_4__Ruminococcaceae;D_5__Ruminococcaceae UCG-005	0	0	0	0.0440068	0	0	0	0	0	0	0.77562	0.632598	0.605094	0.676605	0.682106	1.10017	1.14418	0.687607	0.45107	0.154024	0.110017	0.0770119	0.115518	0.242038	0.12652	0.247538	0.225535	0.198031	0.308048	0.176027	0.687607	0.396061	0.225535	0.0495077	0.264041
D_0__Bacteria;D_1__Firmicutes;D_2__Clostridia;D_3__Clostridiales;D_4__Lachnospiraceae;D_5__[Eubacterium] hallii group	0	0	0	0	0	0	0	0.176027	0	0	0	1.15518	1.25419	1.19369	1.35871	0.264041	0.506078	0.291545	2.26085	1.12217	1.04516	1.38621	1.13868	1.07267	1.06166	1.37521	1.08367	0	0	0	0	0	0	0	0
D_0__Bacteria;D_1__Firmicutes;D_2__Clostridia;D_3__Clostridiales;D_4__Lachnospiraceae;D_5__Coprococcus 3	0	0	0	0.6436	0.990153	1.2927	0.77562	2.47538	1.2597	2.42038	4.59321	0.588591	0.57759	0.51708	0.627097	0.247538	0.561087	0.522581	0	0	0	0	0	0	0	0	0	0.357555	0.363056	0.407063	0.445569	0.209032	0.302547	0.313549	0.143022
D_0__Bacteria;D_1__Bacteroidetes;D_2__Bacteroidia;D_3__Bacteroidales;D_4__Barnesiellaceae;D_5__Barnesiella	0	0	0	0	0	0	0	0	0	0	0	0.687607	0.83613	0.704109	0.907641	1.56224	1.89779	2.5634	0.852632	0	0	0	0	0	0	0	0	0.346554	0.473073	0.38506	0.401562	0.6436	0.720612	0.302547	0.555586
D_0__Bacteria;D_1__Firmicutes;D_2__Clostridia;D_3__Clostridiales;D_4__Ruminococcaceae;D_5__[Eubacterium] coprostanoligenes group	0	0	0	0.0660102	0	0	0	0	0	0	0	0	0.0440068	0.0550085	0.0605094	0.0990153	0.148523	0	0	0.0715111	0.0770119	0.0770119	0.0715111	0.143022	0.110017	0.225535	0.176027	0.269542	0.363056	0.346554	0.489576	0.297046	0.396061	0.429067	0.396061
D_0__Bacteria;D_1__Bacteroidetes;D_2__Bacteroidia;D_3__Bacteroidales;D_4__Prevotellaceae;D_5__Alloprevotella	7.70669	0	0	0	0	0	0	0	0	0	0	0	0	0	0	0	0	0	0	0	0	0	0	0	0	0	0	0.357555	0.412564	0.473073	0.319049	1.16068	0.891138	0.242038	0.880136
D_0__Bacteria;D_1__Firmicutes;D_2__Clostridia;D_3__Clostridiales;D_4__Lachnospiraceae;D_5__GCA-900066575	0	0	0	1.41372	2.23335	2.15633	1.35321	0	0	0	0	0.0605094	0.0605094	0.0495077	0.0660102	0	0	0	0	0	0	0	0	0	0	0	0	0.38506	0.45107	0.335552	0.374058	0.038506	0	0	0
D_0__Bacteria;D_1__Actinobacteria;D_2__Coriobacteriia;D_3__Coriobacteriales;D_4__Coriobacteriaceae;D_5__Collinsella	0	0	0	0.203532	0.456571	0.346554	0.170526	0.308048	0	0	0	1.3092	0.863634	1.08367	1.15518	0	0	0	0	0.264041	0.374058	0.297046	0.45107	0	0	0	0	0.0990153	0.203532	0.286044	0.275043	0	0.038506	0	0
D_0__Bacteria;D_1__Firmicutes;D_2__Clostridia;D_3__Clostridiales;D_4__Lachnospiraceae;D_5__Lachnospiraceae ND3007 group	0	0	0	0.429067	0.544584	0.275043	0.363056	1.3037	2.27185	0	0	0.45107	0.38506	0.38506	0.291545	0	0.0330051	0	0	0.495077	0.478574	0.396061	0.506078	0.176027	0.165026	0.115518	0.121019	0.242038	0.143022	0.165026	0.247538	0	0.0880136	0	0.0550085
D_0__Bacteria;D_1__Proteobacteria;D_2__Alphaproteobacteria;D_3__Rhodospirillales;D_4__uncultured;D_5__Azospirillum sp. 47_25	0	0	0	0	0	0	0	0	0	0	0	1.15518	1.42472	1.73277	1.48523	2.05182	1.56774	2.04632	2.23885	0.687607	0.803124	0.715111	0.726113	1.03966	0.858133	1.02866	0.847131	0	0	0	0	0	0	0	0
D_0__Bacteria;D_1__Proteobacteria;D_2__Deltaproteobacteria;D_3__Desulfovibrionales;D_4__Desulfovibrionaceae;D_5__Bilophila	0	0	0	0	0	0	0	0	0	0	0	0.148523	0.19253	0.143022	0.170526	0.489576	0.319049	0.330051	0.357555	0.412564	0.236537	0.170526	0.220034	0.649101	0.70961	0.638099	0.357555	0.159525	0.115518	0.12652	0.275043	0.302547	0.225535	0.390561	0.176027
D_0__Bacteria;D_1__Firmicutes;D_2__Clostridia;D_3__Clostridiales;D_4__Ruminococcaceae;D_5__Anaerotruncus	0	0	0	0	0	0	0	0	0	0	0	0	0	0	0	0	0	0	0	0	0	0	0	0	0	0	0	0.198031	0.225535	0.264041	0.368557	0.181528	0.346554	0.0880136	0.341053
D_0__Bacteria;D_1__Firmicutes;D_2__Clostridia;D_3__Clostridiales;D_4__Christensenellaceae;D_5__Christensenellaceae R-7 group	0	0	0	0.12652	0.236537	0.308048	0	0.84163	0	0	0	0.632598	0.929644	0.83613	0.995654	0.335552	0.561087	0.209032	0	0	0	0	0	0	0	0	0	0.181528	0.176027	0.187029	0.330051	0.0550085	0.0990153	0.0880136	0.143022
D_0__Bacteria;D_1__Firmicutes;D_2__Clostridia;D_3__Clostridiales;D_4__Lachnospiraceae;D_5__[Ruminococcus] gauvreauii group	0	0	0	0	0	0	0	0	0	0	0	1.45773	2.71742	1.9308	2.13983	0.671104	1.09467	0.896639	0.462072	0.484075	0.440068	0.390561	0.665603	0.38506	0.440068	0.330051	0.522581	0	0	0	0	0	0	0	0
D_0__Bacteria;D_1__Firmicutes;D_2__Clostridia;D_3__Clostridiales;D_4__Ruminococcaceae;D_5__Negativibacillus	0	0	0	0	0	0	0	0	0	0	0	0	0	0	0	0	0	0	0	0.0660102	0.0935145	0.0660102	0.0935145	0.0825128	0.0715111	0.0660102	0.0660102	0.225535	0.247538	0.236537	0.269542	0.242038	0.308048	0.0880136	0.176027
D_0__Bacteria;D_1__Cyanobacteria;D_2__Melainabacteria;D_3__Gastranaerophilales;D_4__Clostridium sp. CAG:306;D_5__Clostridium sp. CAG:306	0	0	0	0	0	0	0	0	0	0	0	0	0	0	0	0	0	0	0	0.539084	0.885637	0.70961	0.847131	0.0660102	0	0	0.038506	0.0770119	0.0880136	0.0660102	0.0605094	0	0	0	0
D_0__Bacteria;D_1__Firmicutes;D_2__Clostridia;D_3__Clostridiales;D_4__Ruminococcaceae;D_5__Ruminococcaceae UCG-013	0	0	0	0	0	0	0	0	0	0	0	0.0550085	0.0495077	0.0550085	0.110017	0.253039	0.12652	0.121019	0	0.473073	0.407063	0.412564	0.506078	0.429067	0.682106	0.533583	0.550085	0.0440068	0.0825128	0.0770119	0.0770119	0	0.0770119	0.0495077	0.137521
D_0__Bacteria;D_1__Fusobacteria;D_2__Fusobacteriia;D_3__Fusobacteriales;D_4__Fusobacteriaceae;D_5__Fusobacterium	0	0	0	0	0	0	0	0	0	0	0	0	0	0	0	0	0	0	0	0.737114	0.891138	0.489576	0.896639	0.511579	0.676605	0.357555	0.275043	0	0	0.0440068	0	0	0	0	0
D_0__Bacteria;D_1__Firmicutes;D_2__Negativicutes;D_3__Selenomonadales;D_4__Veillonellaceae;D_5__Veillonella	0	0	0	0.0770119	0.0770119	0.225535	0	0	0	0	0	0	0	0	0	0.203532	0	0	0	0.313549	0.544584	0.594092	0.434567	0.286044	0.319049	0.341053	0.423566	0.45107	0.0935145	0	0	0	0	0	0
D_0__Bacteria;D_1__Firmicutes;D_2__Clostridia;D_3__Clostridiales;D_4__Ruminococcaceae;D_5__Ruminococcaceae UCG-003	0	0	0	0	0	0	0	0	0	0	0	0.203532	0.170526	0.19253	0.176027	0	0.0605094	0	0	0	0	0	0	0	0	0	0	0.209032	0.12652	0.12652	0.291545	0.401562	0.0880136	0	0.0605094
D_0__Bacteria;D_1__Firmicutes;D_2__Clostridia;D_3__Clostridiales;D_4__Clostridiaceae 1;D_5__Sarcina	0	0	0	0	0	0	0	0	0	0	0	0	0	0	0	0	0	0	0	0	0	0	0	0	0	0	0	0.269542	0.247538	0.148523	0.242038	0.038506	0.0880136	0.110017	0.110017
D_0__Bacteria;D_1__Actinobacteria;D_2__Coriobacteriia;D_3__Coriobacteriales;D_4__Eggerthellaceae;D_5__Senegalimassilia	0	0	0	0	0	0	0	0	0	0	0	0	0	0	0	0	0	0	0	0	0	0	0	0	0	0	0	0.148523	0.231036	0.308048	0.187029	0	0	0.0935145	0
D_0__Bacteria;D_1__Actinobacteria;D_2__Coriobacteriia;D_3__Coriobacteriales;D_4__Eggerthellaceae;D_5__uncultured	0	0	0	0	0	0	0	0	0	0	0	0	0	0	0	0	0	0	0	0	0	0	0	0	0	0	0	0.181528	0.19253	0.209032	0.214533	0.0880136	0.154024	0.236537	0.038506
D_0__Bacteria;D_1__Firmicutes;D_2__Bacilli;D_3__Lactobacillales;D_4__Lactobacillaceae;D_5__Lactobacillus	0	0	0	0	0	0	0	0	0	0	0	1.96931	2.28835	2.74493	2.26085	2.28285	2.70642	2.33236	1.51273	0.181528	0.242038	0.374058	0.159525	0.0715111	0.209032	0.0440068	0.170526	0	0	0	0	0	0	0	0
D_0__Bacteria;D_1__Firmicutes;D_2__Clostridia;D_3__Clostridiales;D_4__Lachnospiraceae;D_5__Lachnospiraceae FCS020 group	0	0	0	0.610595	0.352055	0.489576	0.539084	0.610595	0	0	0	0.121019	0.0880136	0.110017	0.110017	0	0	0.137521	0	0.495077	0.495077	0.473073	0.616095	0.407063	0.390561	0.352055	0.605094	0	0	0	0	0	0	0	0
D_0__Bacteria;D_1__Firmicutes;D_2__Clostridia;D_3__Clostridiales;D_4__Lachnospiraceae;D_5__Marvinbryantia	0	0	0	0.148523	0.0660102	0.121019	0.181528	0	0	0	0	0.220034	0.291545	0.220034	0.203532	0.363056	0.308048	0.115518	0.275043	0	0	0	0	0	0	0	0	0.225535	0.308048	0.176027	0.159525	0.137521	0.0715111	0	0.0440068
D_0__Bacteria;D_1__Firmicutes;D_2__Clostridia;D_3__Clostridiales;D_4__Ruminococcaceae;D_5__Ruminococcaceae UCG-004	0	0	0	0.0440068	0	0	0	0	0	0	0	0.357555	0.231036	0.401562	0.412564	0.797624	0.550085	0.440068	0.269542	0.0440068	0	0	0	0	0	0	0	0.187029	0.12652	0.143022	0.187029	0.313549	0.165026	0.0935145	0.115518
D_0__Bacteria;D_1__Cyanobacteria;D_2__Melainabacteria;D_3__Gastranaerophilales;__;__	0	0	0	0	0	0	0	0	0	0	0	0	0	0	0	0	0	0	0	0	0	0	0	0	0	0	0	0.181528	0.25854	0.176027	0.198031	0.13202	0.0330051	0.0880136	0.0660102
D_0__Bacteria;D_1__Firmicutes;D_2__Clostridia;D_3__Clostridiales;D_4__Ruminococcaceae;D_5__Butyricicoccus	0	0	0	0.759118	0.357555	0.500578	0.473073	0.302547	0	1.25419	0.731613	0.0990153	0.0495077	0.110017	0.0990153	0	0.0605094	0.12652	0.165026	0.25854	0.231036	0.429067	0.280543	1.01216	0.852632	0.858133	0.6436	0	0	0	0	0.038506	0.0495077	0	0.0495077
D_0__Bacteria;D_1__Firmicutes;D_2__Clostridia;D_3__Clostridiales;D_4__Ruminococcaceae;D_5__CAG-352	0	0	0	0	0	0	0	0	0	0	0	0	0	0	0	0	0	0	0	0	0	0	0	0	0	0	0	0.148523	0.236537	0.198031	0.143022	0.539084	0.368557	0.121019	0.247538
D_0__Bacteria;D_1__Firmicutes;D_2__Clostridia;D_3__Clostridiales;D_4__Ruminococcaceae;D_5__Ruminococcus 1	0	0	0	0	0	0.115518	0	0	0	0	0	1.41372	1.37521	1.39722	0.946147	1.73277	2.68992	3.00897	2.27735	0.0440068	0	0.121019	0.038506	0.0330051	0	1.00666	0.0770119	0.0440068	0.0550085	0	0.0550085	0.115518	0.137521	0.0550085	0.0825128
D_0__Bacteria;D_1__Firmicutes;D_2__Clostridia;D_3__Clostridiales;D_4__Clostridiaceae 1;D_5__Clostridium sensu stricto 1	0	0	0	0	0	0	0	0	0	0	0	0	0	0.0495077	0	0	0.0770119	0	0	0	0	0	0	0	0	0	0	0.148523	0.198031	0.148523	0.148523	0	0.121019	0.176027	0.12652
D_0__Bacteria;D_1__Firmicutes;D_2__Clostridia;D_3__Clostridiales;D_4__Lachnospiraceae;D_5__[Eubacterium] eligens group	0	0	0	0.319049	0.159525	0.187029	0	1.11667	0	2.5744	0	0	0	0	0	0	0.0550085	0.121019	0	0	0	0	0	0	0	0	0	0.148523	0.159525	0.154024	0.12652	0.357555	0.357555	0.104516	0.308048
D_0__Bacteria;D_1__Firmicutes;D_2__Clostridia;D_3__Clostridiales;D_4__Lachnospiraceae;D_5__uncultured	0	0	0	0.209032	0.423566	0.341053	0	0.407063	0	0	0	0.330051	0.319049	0.225535	0.247538	0	0.0880136	0	0.165026	0.346554	0.302547	0.225535	0.231036	0.319049	0.242038	0.25854	0.275043	0.0440068	0.0770119	0.104516	0	0	0.0330051	0	0.038506
D_0__Bacteria;D_1__Firmicutes;D_2__Clostridia;D_3__Clostridiales;D_4__Lachnospiraceae;D_5__Tyzzerella 3	0	0	0	0	0	0	0	0	0	0	0	0	0	0	0	0	0	0	0	0.566588	0.473073	0.297046	0.379559	0.495077	0.522581	0.423566	0.390561	0	0	0	0	0	0	0	0
D_0__Bacteria;D_1__Bacteroidetes;D_2__Bacteroidia;D_3__Bacteroidales;D_4__Marinifilaceae;D_5__Butyricimonas	0	0	0	0.181528	0.104516	0.13202	0.319049	0.6436	0	0.885637	0	0.104516	0.0550085	0.0880136	0.0770119	0	0.297046	0.13202	0.143022	0.176027	0.137521	0.104516	0.110017	0.0605094	0.038506	0.0605094	0	0.121019	0.137521	0.0330051	0.121019	0.203532	0.0605094	0.0990153	0.148523
D_0__Bacteria;D_1__Firmicutes;D_2__Clostridia;D_3__Clostridiales;D_4__Ruminococcaceae;D_5__Ruminiclostridium 6	0	0	0	0.0660102	0.038506	0.0990153	0	0.396061	0	0	0	0	0	0	0	0	0	0	0	0	0	0	0	0	0	0	0	0.12652	0.137521	0.0880136	0.137521	0.379559	0.495077	0.198031	0.522581
D_0__Bacteria;D_1__Firmicutes;D_2__Clostridia;D_3__Clostridiales;__;__	0	0	0	0	0	0	0	0	0	0	0	0	0	0	0	0	0	0	0	0	0	0	0	0	0	0	0	0.121019	0.181528	0.12652	0.115518	0.330051	0.297046	0.286044	0.511579
D_0__Bacteria;D_1__Firmicutes;D_2__Clostridia;D_3__Clostridiales;D_4__Ruminococcaceae;D_5__Oscillibacter	0	0	0	0	0	0	0	0	0	0	0	0.0550085	0	0.0605094	0	0	0.0330051	0	0.154024	0.0550085	0.0880136	0.038506	0.0605094	0.121019	0.038506	0.0330051	0	0.0770119	0.0330051	0.0550085	0.165026	0	0.0935145	0	0.0935145
D_0__Bacteria;D_1__Firmicutes;D_2__Clostridia;D_3__Clostridiales;D_4__Ruminococcaceae;D_5__Ruminiclostridium 9	0	0	0	0	0	0	0	0	0	0	0	0.0550085	0.0550085	0.0990153	0.0880136	0	0.0825128	0	0.220034	0.0605094	0.0770119	0.0660102	0.0825128	0.0550085	0	0	0	0.110017	0.0880136	0.0550085	0.121019	0.0660102	0.159525	0.0770119	0.12652
D_0__Bacteria;D_1__Firmicutes;D_2__Clostridia;D_3__Clostridiales;D_4__Lachnospiraceae;D_5__[Eubacterium] ruminantium group	0	0	0	0	0	0	0	0	0	0	0	0	0	0	0	0	0	0	0	0	0	0	0	0	0	0	0	0.12652	0.198031	0.110017	0.115518	0.143022	0.187029	0.0660102	0.25854
D_0__Bacteria;D_1__Proteobacteria;D_2__Deltaproteobacteria;D_3__Desulfovibrionales;D_4__Desulfovibrionaceae;D_5__Desulfovibrio	0	0	0	0.0825128	0	0.198031	0	0.13202	0	0	0	0.214533	0.286044	0.286044	0.319049	0.280543	0.566588	0.495077	0	0	0	0	0	0	0	0	0	0.0660102	0.0880136	0.0495077	0.13202	0.0440068	0.0605094	0.38506	0.165026
D_0__Bacteria;D_1__Firmicutes;D_2__Clostridia;D_3__Clostridiales;D_4__Lachnospiraceae;D_5__Lachnospiraceae UCG-010	0	0	0	0.12652	0.19253	0.154024	0.412564	0	0	0	0	0.379559	0.632598	0.57759	0.572089	0.511579	0.187029	0.269542	0	0	0	0	0	0	0	0	0	0.0660102	0.137521	0.0550085	0.0935145	0	0	0	0
D_0__Bacteria;D_1__Proteobacteria;D_2__Gammaproteobacteria;D_3__Enterobacteriales;D_4__Enterobacteriaceae;D_5__Escherichia-Shigella	0	0	0	3.15199	1.76577	1.9363	3.06397	4.70873	4.59871	3.45454	5.30832	0.462072	0.253039	0.280543	0.280543	0.467572	0.423566	0.500578	0.25854	0	0	0	0	0	0	0	0	0	0	0.115518	0.0495077	0	0	0.038506	0
D_0__Bacteria;D_1__Firmicutes;D_2__Clostridia;D_3__DTU014;D_4__uncultured bacterium;D_5__uncultured bacterium	0	0	0	0	0	0	0	0	0	0	0	0	0	0	0	0	0	0	0	0	0	0	0	0	0	0	0	0	0	0	0.209032	0	0	0	0
D_0__Bacteria;D_1__Firmicutes;D_2__Clostridia;D_3__Clostridiales;D_4__Eubacteriaceae;D_5__Eubacterium	0	0	0	0	0	0	0	0	0	0	0	0	0	0	0	0	0	0	0	0	0	0	0	0	0	0	0	0.0550085	0.0495077	0.0440068	0.143022	0	0.0440068	0.0880136	0
D_0__Bacteria;D_1__Bacteroidetes;D_2__Bacteroidia;D_3__Bacteroidales;D_4__Prevotellaceae;D_5__Paraprevotella	0	0	0	0	0	0	0	0	0	0	0	2.22234	1.38621	1.38621	1.80978	1.06717	2.41487	2.97596	1.52374	0	0	0	0	0	0	0	0	0	0	0	0	0	0	0	0
D_0__Bacteria;D_1__Proteobacteria;D_2__Gammaproteobacteria;D_3__Betaproteobacteriales;D_4__Burkholderiaceae;D_5__Parasutterella	0	0	0	0	0	0	0	0	0	0	0	0.352055	0.390561	0.45107	0.489576	1.43572	1.3037	1.13868	0.869135	0.0715111	0.0935145	0.0495077	0.104516	0.286044	0.308048	0.467572	0.220034	0.038506	0	0	0	0.0605094	0	0.0880136	0.0330051
D_0__Bacteria;D_1__Firmicutes;D_2__Negativicutes;D_3__Selenomonadales;D_4__Veillonellaceae;D_5__Dialister	0	0	0	0.0550085	0.121019	0	0	1.22119	0	0	0.847131	0	0	0	0	0	0	0	0	0.154024	0.12652	0.231036	0.176027	0.357555	0.32455	0.412564	0.308048	0	0	0	0	0	0	0	0
D_0__Bacteria;D_1__Firmicutes;D_2__Clostridia;D_3__Clostridiales;D_4__Ruminococcaceae;D_5__Ruminococcaceae NK4A214 group	0	0	0	0	0	0	0	0	0	0	0	0.0495077	0.0605094	0.0330051	0.0495077	0	0	0	0	0.0990153	0.0880136	0.104516	0.0880136	0.0605094	0.0660102	0.148523	0.115518	0.0550085	0	0.0660102	0.038506	0.0935145	0.0660102	0.0330051	0.038506
D_0__Bacteria;D_1__Firmicutes;D_2__Clostridia;D_3__Clostridiales;D_4__Family XIII;D_5__Mogibacterium	0	0	0	0	0	0	0	0	0	0	0	0	0	0	0	0	0	0	0	0	0	0	0	0	0	0	0	0.0880136	0.0770119	0.0880136	0.0770119	0	0.0440068	0.0550085	0.0440068
D_0__Bacteria;D_1__Proteobacteria;D_2__Alphaproteobacteria;D_3__Rhodospirillales;D_4__uncultured;D_5__gut metagenome	0	0	0	0	0	0	0	0	0	0	0	1.33121	1.57324	1.72177	1.56224	0	0.308048	0	0.220034	0	0	0	0	0	0	0	0	0	0.0495077	0	0	0.0715111	0.038506	0	0.0605094
D_0__Bacteria;D_1__Firmicutes;D_2__Clostridia;D_3__Clostridiales;D_4__Ruminococcaceae;__	0	0	0	0	0	0	0	0.110017	0	0	0	0	0	0	0	0	0.038506	0	0	0	0	0	0.038506	0	0.0935145	0	0.0770119	0	0	0	0.143022	0.13202	0	0.0495077	0
D_0__Bacteria;D_1__Firmicutes;D_2__Clostridia;D_3__Clostridiales;D_4__Lachnospiraceae;D_5__GCA-900066755	0	0	0	0	0	0	0	0	0	0	0	0	0	0	0	0	0	0	0	0	0	0	0	0	0	0	0	0.0660102	0.038506	0.0715111	0.0825128	0	0	0	0
D_0__Bacteria;D_1__Firmicutes;D_2__Clostridia;D_3__Clostridiales;D_4__Peptostreptococcaceae;D_5__Romboutsia	0	0	0	0	0	0	0	0	0	0	0	0	0	0	0	0	0	0	0	0	0	0	0	0	0	0	0	0.0605094	0.0605094	0.0770119	0.0715111	0	0	0	0.0605094
D_0__Bacteria;D_1__Firmicutes;D_2__Clostridia;D_3__Clostridiales;D_4__Ruminococcaceae;D_5__UBA1819	0	0	0	0	0	0	0	0	0	0	0	0	0.0440068	0.0330051	0	0.187029	0.038506	0.203532	0	0	0	0	0	0.038506	0	0	0	0.0660102	0.0660102	0.038506	0.0770119	0.0715111	0.0495077	0	0.0330051
D_0__Bacteria;D_1__Firmicutes;D_2__Erysipelotrichia;D_3__Erysipelotrichales;D_4__Erysipelotrichaceae;D_5__Candidatus Stoquefichus	0	0	0	0	0	0	0	0	0	0	0	0	0	0	0	0	0	0	0	0	0	0	0	0	0	0	0	0.0660102	0.110017	0	0.0825128	0.181528	0.154024	0	0.236537
D_0__Bacteria;D_1__Firmicutes;D_2__Clostridia;D_3__Clostridiales;D_4__Ruminococcaceae;D_5__Intestinimonas	0	0	0	0	0	0	0	0	0	0	0	0	0	0	0	0	0.0550085	0	0	0	0	0	0	0	0	0	0	0	0.0550085	0.0770119	0.0770119	0.038506	0	0.038506	0.0660102
D_0__Bacteria;D_1__Firmicutes;D_2__Clostridia;D_3__Clostridiales;D_4__Ruminococcaceae;D_5__Ruminococcus 2	0	0	0	0	0	0	0	0.396061	0	0	0	1.22669	0.544584	1.02866	0.522581	3.35002	2.90445	3.92761	2.37087	0	0	0	0	0	0	0	0	0	0	0	0	0	0	0	0
D_0__Bacteria;D_1__Firmicutes;D_2__Clostridia;D_3__Clostridiales;D_4__Lachnospiraceae;D_5__[Ruminococcus] gnavus group	0	0	0	2.13983	0.940646	2.09582	2.28285	9.18092	5.92992	14.2032	5.61087	0.181528	0.0935145	0.19253	0.0935145	0.45107	0.198031	0	0.374058	0.038506	0	0	0	0	0	0	0	0	0	0.038506	0	0	0	0	0
D_0__Bacteria;D_1__Proteobacteria;D_2__Gammaproteobacteria;D_3__Pasteurellales;D_4__Pasteurellaceae;D_5__Actinobacillus	0	0	0	0	0	0	0	0	0	0	0	0	0	0	0	0	0	0	0	0.121019	0.0605094	0.225535	0.0660102	0.0880136	0.0880136	0.0935145	0.236537	0	0	0	0	0	0	0	0
D_0__Bacteria;D_1__Bacteroidetes;D_2__Bacteroidia;D_3__Flavobacteriales;D_4__Flavobacteriaceae;D_5__uncultured	0	0	0	0	0	0	0	0	0	0	0	0	0	0	0	0	0	0	0	0	0	0	0	0	0	0	0	0.0440068	0.0330051	0.0330051	0.0495077	0.12652	0.0330051	0.159525	0.209032
D_0__Bacteria;D_1__Cyanobacteria;D_2__Melainabacteria;D_3__Gastranaerophilales;D_4__gut metagenome;D_5__gut metagenome	0	0	0	0	0	0	0	0	0	0	0	0	0	0	0	0	0	0	0	0	0	0	0	0	0	0	0	0.0605094	0.0935145	0.0550085	0.0330051	0	0	0	0
D_0__Bacteria;D_1__Actinobacteria;D_2__Coriobacteriia;D_3__Coriobacteriales;D_4__Coriobacteriales Incertae Sedis;D_5__uncultured	0	0	0	0	0	0	0	0	0	0	0	0	0	0	0	0	0	0	0	0.0825128	0.0935145	0.0880136	0.115518	0.0990153	0.286044	0.187029	0.159525	0	0	0	0	0	0	0	0
D_0__Bacteria;D_1__Firmicutes;D_2__Erysipelotrichia;D_3__Erysipelotrichales;D_4__Erysipelotrichaceae;D_5__[Clostridium] innocuum group	0	0	0	0	0	0	0	0	0	0	0	0	0	0	0	0	0.0770119	0	0	0	0	0	0	0	0	0	0	0.0550085	0.0495077	0	0.0550085	0.0660102	0	0.0330051	0.0990153
D_0__Bacteria;D_1__Actinobacteria;D_2__Actinobacteria;D_3__Bifidobacteriales;D_4__Bifidobacteriaceae;D_5__Bifidobacterium	0	0	0	0	0	0	0	0	0	0	0	0.286044	0.319049	0.341053	0.346554	0.302547	0.137521	0.280543	0	0.0330051	0.0550085	0.0660102	0.0605094	0.0330051	0	0	0	0	0	0	0	0	0	0	0
D_0__Bacteria;D_1__Firmicutes;D_2__Clostridia;D_3__Clostridiales;D_4__Lachnospiraceae;D_5__Lachnospiraceae UCG-008	0	0	0	0.13202	0.110017	0.181528	0	0	0	0	0	0	0.0715111	0.0440068	0.0880136	0	0	0	0	0.0770119	0.0990153	0.0770119	0.104516	0	0	0	0	0	0	0	0	0	0	0	0
D_0__Bacteria;D_1__Firmicutes;D_2__Bacilli;D_3__Lactobacillales;D_4__Enterococcaceae;D_5__Enterococcus	0	0	0	0	0	0	0	0	0	0	0	0	0	0	0	0	0	0	0	0	0	0	0	0	0	0	0	0.0660102	0.0550085	0.0550085	0	0	0	0.038506	0.038506
D_0__Bacteria;D_1__Proteobacteria;D_2__Gammaproteobacteria;D_3__Pasteurellales;D_4__Pasteurellaceae;__	0	0	0	0	0	0	0	0	0	0	0	0	0	0	0	0	0	0	0	0.0440068	0	0.0605094	0.0605094	0.0770119	0.0825128	0.0880136	0.308048	0	0	0	0	0	0	0	0
D_0__Bacteria;D_1__Bacteroidetes;D_2__Bacteroidia;D_3__Chitinophagales;D_4__Chitinophagaceae;D_5__Sediminibacterium	0	0	0	0	0	0	0	0	0	0	0	0	0	0	0	0	0	0	0	0.0440068	0.038506	0	0	0.13202	0.121019	0.165026	0.0935145	0	0	0	0	0.555586	0.121019	0.412564	0.407063
D_0__Bacteria;D_1__Proteobacteria;D_2__Gammaproteobacteria;D_3__Pseudomonadales;D_4__Pseudomonadaceae;D_5__Pseudomonas	9.81352	6.13895	0	0.181528	0.143022	0.269542	0	0.704109	1.51824	0	0	0	0	0	0	0.110017	0	0	0	0.038506	0.0440068	0	0	0.104516	0.12652	0.110017	0.0605094	0	0	0	0	0.830629	0.12652	0.25854	0.357555
D_0__Bacteria;D_1__Firmicutes;D_2__Clostridia;D_3__Clostridiales;D_4__Lachnospiraceae;D_5__Lachnospiraceae UCG-004	0	0	0	0.418065	0.511579	0.929644	0.500578	0.209032	0	0	0	0.165026	0.187029	0.198031	0.148523	0.143022	0.0715111	0	0	0.0495077	0	0.0330051	0.0495077	0	0	0	0	0	0	0	0	0	0	0	0
D_0__Bacteria;D_1__Firmicutes;D_2__Clostridia;D_3__Clostridiales;D_4__Lachnospiraceae;D_5__Lactonifactor	0	0	0	0	0	0	0	0	0	0	0	0	0	0	0	0	0	0	0	0	0	0	0	0	0	0	0	0	0	0	0.038506	0	0	0	0
D_0__Bacteria;D_1__Firmicutes;D_2__Erysipelotrichia;D_3__Erysipelotrichales;D_4__Erysipelotrichaceae;D_5__Turicibacter	0	0	0	0	0	0	0	0	0	0	0	0	0	0	0	0	0	0	0	0	0	0	0	0	0	0	0	0	0	0	0.0330051	0	0	0.137521	0
D_0__Bacteria;D_1__Firmicutes;D_2__Clostridia;D_3__Clostridiales;D_4__Lachnospiraceae;D_5__Sellimonas	0	0	0	0	0	0	0	0	0	0	0	0	0	0	0	0	0	0	0	0.0825128	0.0495077	0.0605094	0.0550085	0	0.0330051	0.0495077	0	0	0	0	0	0	0	0	0
D_0__Bacteria;D_1__Firmicutes;D_2__Bacilli;D_3__Lactobacillales;D_4__Carnobacteriaceae;D_5__Granulicatella	0	0	0	0	0	0	0	0	0	0	0	0	0	0	0	0	0	0	0	0	0	0	0	0	0	0	0	0	0	0	0.0330051	0	0	0	0
D_0__Bacteria;D_1__Firmicutes;D_2__Bacilli;D_3__Bacillales;D_4__Staphylococcaceae;D_5__Staphylococcus	0	0	0	0	0.038506	0.121019	0	0.110017	2.89895	1.89779	4.58221	0	0	0	0	0	0.121019	0.25854	0	0	0	0	0	0	0	0	0	0	0	0	0	2.84394	0	0	0.038506
D_0__Bacteria;D_1__Firmicutes;D_2__Clostridia;D_3__Clostridiales;D_4__Peptostreptococcaceae;D_5__Intestinibacter	0	0	0	0	0	0	0	0	0	0	0	0	0	0	0	0	0	0	0	0	0	0	0	0	0	0	0	0	0.0605094	0.0330051	0	0	0	0	0
D_0__Bacteria;D_1__Actinobacteria;D_2__Coriobacteriia;D_3__Coriobacteriales;D_4__Eggerthellaceae;D_5__Adlercreutzia	0	0	0	0	0	0	0	0	0	0	0	0	0	0.0605094	0.0495077	0	0	0	0	0.0605094	0.0330051	0.038506	0.0330051	0	0.038506	0	0	0	0	0	0	0	0	0	0
D_0__Bacteria;D_1__Firmicutes;D_2__Clostridia;D_3__Clostridiales;D_4__Ruminococcaceae;D_5__Oscillospira	0	0	0	0	0	0	0	0	0	0	0	0	0	0	0.038506	0	0	0	0	0.0550085	0.0935145	0.0715111	0	0	0	0	0	0	0	0	0	0	0	0	0
D_0__Bacteria;D_1__Firmicutes;D_2__Clostridia;D_3__Clostridiales;D_4__Lachnospiraceae;D_5__Lachnospiraceae UCG-001	0	0	0	0	0	0	0	0	0	0	0	0	0	0	0	0	0	0	0	0.0440068	0.0605094	0	0.0330051	0.038506	0.0495077	0.0550085	0.0440068	0	0	0	0	0	0	0	0
D_0__Bacteria;D_1__Firmicutes;D_2__Clostridia;D_3__Clostridiales;D_4__Family XIII;D_5__Family XIII UCG-001	0	0	0	0	0	0	0	0	0	0	0	0	0.0440068	0.0330051	0	0	0	0	0.143022	0	0	0	0	0	0	0	0	0.0495077	0	0	0	0	0.0330051	0	0.0825128
D_0__Bacteria;D_1__Proteobacteria;D_2__Gammaproteobacteria;D_3__Betaproteobacteriales;D_4__Neisseriaceae;D_5__Neisseria	0	0	0	0	0	0	0	0	0	0	0	0	0	0	0	0	0	0	0	0	0.0330051	0.0330051	0	0	0.0990153	0	0.0330051	0	0	0	0	0.489576	0	0.137521	0.038506
D_0__Bacteria;D_1__Firmicutes;D_2__Clostridia;D_3__Clostridiales;D_4__Lachnospiraceae;D_5__[Eubacterium] ventriosum group	0	0	0	0	0	0	0	0	0	0	0	0.0660102	0.115518	0.0660102	0.148523	0	0.115518	0.110017	0	0	0	0	0	0	0	0	0	0	0	0	0	0.0440068	0.0715111	0.0440068	0.0495077
D_0__Bacteria;D_1__Proteobacteria;D_2__Alphaproteobacteria;D_3__Caulobacterales;D_4__Caulobacteraceae;D_5__Brevundimonas	0	0	0	0	0	0	0	0	0	0	0	0	0	0	0	0	0	0	8.76836	0	0	0	0	0	0	0	0	0	0	0	0	0.0880136	0	0	0
D_0__Bacteria;D_1__Firmicutes;D_2__Clostridia;D_3__Clostridiales;D_4__Lachnospiraceae;D_5__Coprococcus 2	0	0	0	0	0	0	0	0	0	0	0	0.104516	0.104516	0.137521	0.176027	0.209032	0.121019	0	0	0	0	0	0	0	0	0	0	0	0	0	0	0	0	0	0
D_0__Bacteria;D_1__Firmicutes;D_2__Clostridia;D_3__Clostridiales;D_4__Family XIII;D_5__Family XIII AD3011 group	0	0	0	0	0.0495077	0	0	0.176027	0	0	0	0.0935145	0.0330051	0.0770119	0	0	0	0	0	0	0	0	0.0330051	0	0	0	0	0	0	0	0	0	0	0.0660102	0
D_0__Bacteria;D_1__Proteobacteria;D_2__Alphaproteobacteria;D_3__Sphingomonadales;D_4__Sphingomonadaceae;D_5__Sphingomonas	32.7411	32.5705	47.6154	0	0	0	0	0	0	0	0.770119	0	0	0	0	0	0	0.115518	0	0	0	0	0	0	0	0	0	0	0	0	0	0	0	0.0330051	0.0550085
D_0__Bacteria;D_1__Firmicutes;D_2__Clostridia;D_3__Clostridiales;D_4__Peptococcaceae;D_5__uncultured	0	0	0	0	0.038506	0	0	0	0	0	0	0	0	0	0	0	0	0.0935145	0	0	0	0	0	0	0	0	0	0.0330051	0	0	0	0	0	0	0
D_0__Bacteria;D_1__Firmicutes;D_2__Clostridia;D_3__Clostridiales;D_4__Ruminococcaceae;D_5__Flavonifractor	0	0	0	0	0	0	0	0	0	0	0	0	0	0	0	0	0.038506	0	0	0.0550085	0.0330051	0	0	0.0330051	0.0495077	0	0.0440068	0	0	0	0	0	0	0	0
D_0__Bacteria;D_1__Proteobacteria;D_2__Gammaproteobacteria;D_3__Betaproteobacteriales;D_4__Burkholderiaceae;D_5__Oxalobacter	0	0	0	0	0	0	0	0	0	0	0	0	0	0	0	0	0	0	0	0	0	0	0	0	0	0	0	0.0330051	0	0	0	0	0	0	0
D_0__Bacteria;D_1__Firmicutes;D_2__Erysipelotrichia;D_3__Erysipelotrichales;D_4__Erysipelotrichaceae;D_5__Erysipelatoclostridium	0	0	0	0.456571	0.154024	0.291545	0.19253	1.01766	0	1.58975	1.87579	0	0	0	0	0	0	0	0	0	0	0	0	0	0	0	0	0	0	0	0	0	0	0	0
D_0__Bacteria;D_1__Firmicutes;D_2__Clostridia;D_3__Clostridiales;D_4__Ruminococcaceae;D_5__Ruminococcaceae UCG-010	0	0	0	0	0	0	0	0	0	0	0	0.0715111	0.0825128	0.110017	0.0660102	0.209032	0.181528	0.181528	0.264041	0	0	0	0	0	0	0	0	0	0	0	0	0	0	0	0
D_0__Bacteria;D_1__Firmicutes;D_2__Clostridia;D_3__Clostridiales;D_4__Lachnospiraceae;D_5__[Eubacterium] xylanophilum group	0	0	0	0	0	0	0	0	0	0	0	0.0770119	0.0330051	0.0605094	0.0660102	0	0	0	0	0.0440068	0	0	0	0.0330051	0	0	0	0	0	0	0	0	0	0	0
D_0__Bacteria;D_1__Proteobacteria;D_2__Gammaproteobacteria;D_3__Xanthomonadales;D_4__Xanthomonadaceae;D_5__Stenotrophomonas	0	5.31382	0	0	0	0	0	0	0	0	0	0	0	0	0	0	0	0	0	0	0	0	0	0	0.0550085	0	0	0	0	0	0	0.0880136	0	0.176027	0.209032
D_0__Bacteria;D_1__Proteobacteria;D_2__Alphaproteobacteria;D_3__Rhodospirillales;D_4__uncultured;D_5__uncultured organism	0	0	0	0.13202	0.302547	0	0.176027	0.242038	1.08917	0	0	0	0	0	0	0	0	0	0	0	0	0	0	0	0	0	0	0	0	0	0	0	0	0	0
D_0__Bacteria;D_1__Bacteroidetes;D_2__Bacteroidia;D_3__Chitinophagales;D_4__Chitinophagaceae;D_5__Vibrionimonas	0	0	0	0	0	0	0	0	0	0	0	0	0	0	0	0	0	0	0	0	0	0	0	0	0.0440068	0	0	0	0	0	0	0.0715111	0.0330051	0.0660102	0.137521
D_0__Bacteria;__;__;__;__;__	0	0	0	0.121019	0	0.671104	0.176027	0	0	0	0	0	0	0	0	0.13202	0	0	0	0	0.0605094	0	0	0	0	0	0	0	0	0	0	0	0	0	0
D_0__Bacteria;D_1__Firmicutes;D_2__Erysipelotrichia;D_3__Erysipelotrichales;D_4__Erysipelotrichaceae;D_5__Holdemania	0	0	0	0	0	0	0	0	0	0	0	0	0	0	0	0.0935145	0.0660102	0.121019	0.236537	0	0	0	0	0.038506	0	0	0	0	0	0	0	0	0	0	0.0825128
D_0__Bacteria;D_1__Bacteroidetes;D_2__Bacteroidia;D_3__Bacteroidales;D_4__Prevotellaceae;D_5__Prevotellaceae UCG-001	0	0	0	0	0	0	0	0	0	0	0	0	0	0	0	0	0	0	0	0	0	0	0	0	0	0	0	0	0.038506	0	0	0	0	0	0
D_0__Bacteria;D_1__Proteobacteria;D_2__Gammaproteobacteria;D_3__Betaproteobacteriales;D_4__Burkholderiaceae;D_5__Burkholderia-Caballeronia-Paraburkholderia	7.51967	6.52951	12.773	0	0	0.176027	0	0	0	1.17718	1.62275	0	0	0	0	0.544584	0	0	0.137521	0	0	0	0	0	0	0	0	0	0	0	0	0.0550085	0	0	0
D_0__Bacteria;D_1__Firmicutes;D_2__Bacilli;D_3__Lactobacillales;D_4__Streptococcaceae;D_5__Lactococcus	0	0	0	0	0	0	0	0	0	0	0	0	0	0	0	0	0	0	0	0	0	0	0	0	0	0	0	0	0.0330051	0	0	0	0	0	0
D_0__Bacteria;D_1__Firmicutes;D_2__Clostridia;D_3__Clostridiales;D_4__Peptococcaceae;D_5__Peptococcus	0	0	0	0	0	0	0	0	0	0	0	0.0495077	0.0605094	0.0715111	0.0495077	0	0	0	0	0	0	0	0	0	0	0	0	0	0	0	0	0	0	0	0
Unassigned;__;__;__;__;__	0	0	0	0.25854	0.143022	0.231036	0.198031	0	0	0	0	0	0	0	0	0	0	0	0	0	0	0	0	0	0	0	0	0	0	0	0	0	0	0	0
D_0__Bacteria;D_1__Firmicutes;D_2__Erysipelotrichia;D_3__Erysipelotrichales;D_4__Erysipelotrichaceae;D_5__uncultured	0	0	0	0	0	0	0	0	0	0	0	0	0.0330051	0.0330051	0.0605094	0	0.115518	0	0	0	0	0	0	0	0	0	0	0	0	0	0	0	0	0	0
D_0__Bacteria;D_1__Firmicutes;D_2__Clostridia;D_3__Clostridiales;D_4__Lachnospiraceae;D_5__Hungatella	0	0	0	0	0	0	0	0	0	0	0	0	0	0.0550085	0	0	0.0550085	0.19253	0	0	0	0	0	0.038506	0	0	0	0	0	0	0	0	0	0	0
D_0__Bacteria;D_1__Firmicutes;D_2__Clostridia;D_3__Clostridiales;D_4__Lachnospiraceae;D_5__Moryella	0	0	0	0	0	0	0	0	0	0	0	0	0.0550085	0.0440068	0.0495077	0	0.0495077	0	0	0	0	0	0	0	0	0	0	0	0	0	0	0	0	0	0
D_0__Bacteria;D_1__Actinobacteria;D_2__Actinobacteria;D_3__Corynebacteriales;D_4__Corynebacteriaceae;D_5__Corynebacterium 1	5.07729	0	0	0	0	0	0.368557	0	2.20034	0.907641	0	0	0	0	0	0	0	0	0.13202	0	0	0	0	0	0	0	0	0	0	0	0	0.0440068	0	0	0.0990153
D_0__Bacteria;D_1__Proteobacteria;D_2__Gammaproteobacteria;D_3__Pseudomonadales;D_4__Moraxellaceae;D_5__Acinetobacter	0	0	0	0.0715111	0	0	0	0	1.78228	0	1.47423	0	0	0	0	0	0	0	0	0	0	0	0	0	0	0	0.038506	0	0	0	0	0.0495077	0	0	0
D_0__Bacteria;D_1__Firmicutes;D_2__Clostridia;D_3__Clostridiales;D_4__Ruminococcaceae;D_5__GCA-900066225	0	0	0	0	0	0	0	0	0	0	0	0	0.038506	0	0	0	0.110017	0	0	0	0	0	0	0	0	0.038506	0	0	0	0	0	0	0	0	0
D_0__Bacteria;D_1__Firmicutes;D_2__Clostridia;D_3__Clostridiales;D_4__Lachnospiraceae;D_5__Eisenbergiella	0	0	0	0	0	0	0	0	0	0	0	0	0.0330051	0.0330051	0	0.0990153	0.0550085	0	0	0	0	0	0	0	0	0	0	0	0	0	0	0	0	0.0495077	0
D_0__Archaea;D_1__Euryarchaeota;D_2__Methanobacteria;D_3__Methanobacteriales;D_4__Methanobacteriaceae;D_5__Methanobrevibacter	0	0	0	0	0.115518	0	0	0.170526	0	0	0.946147	0	0	0	0	0	0	0	0	0	0	0	0	0	0	0	0	0	0	0	0	0	0	0	0
D_0__Bacteria;D_1__Proteobacteria;D_2__Alphaproteobacteria;D_3__Rhizobiales;D_4__Beijerinckiaceae;D_5__Bosea	0	0	0	0	0	0	0	0	0	0	0	0	0	0	0	0	0	0	0	0	0	0	0	0	0.0550085	0	0	0	0	0	0	0	0	0.0495077	0
D_0__Bacteria;D_1__Firmicutes;D_2__Erysipelotrichia;D_3__Erysipelotrichales;D_4__Erysipelotrichaceae;D_5__Dielma	0	0	0	0	0	0	0	0	0	0	0	0	0	0	0	0	0.0495077	0	0	0	0	0	0	0	0	0	0	0	0	0	0	0.038506	0	0	0.0660102
D_0__Bacteria;D_1__Firmicutes;D_2__Clostridia;D_3__Clostridiales;D_4__Ruminococcaceae;D_5__Fournierella	0	0	0	0	0	0	0	0	0	0	0	0	0	0	0.0330051	0	0	0.121019	0	0	0	0	0	0	0	0	0	0	0	0	0	0	0	0	0
D_0__Bacteria;D_1__Firmicutes;D_2__Bacilli;D_3__Bacillales;D_4__Planococcaceae;D_5__Domibacillus	0	0	0	0	0	0	0	0	0	0	0	0	0	0	0	0	0	0	1.01766	0	0	0	0	0	0	0	0	0	0	0	0	0	0	0	0
D_0__Bacteria;D_1__Actinobacteria;D_2__Actinobacteria;D_3__Corynebacteriales;D_4__Corynebacteriaceae;D_5__Lawsonella	0	0	0	0	0	0	0	0	0	0	2.21684	0	0	0	0	0.159525	0	0	0	0	0	0	0	0	0	0	0	0	0	0	0	0.0880136	0	0	0
D_0__Bacteria;D_1__Proteobacteria;D_2__Gammaproteobacteria;D_3__Betaproteobacteriales;D_4__Burkholderiaceae;__	0	0	0	0	0	0	0	0	0	0	0	0	0	0	0	0	0	0.13202	0	0	0	0	0	0	0	0	0	0	0	0	0	0.0440068	0	0	0.0330051
D_0__Bacteria;D_1__Spirochaetes;D_2__Spirochaetia;D_3__Spirochaetales;D_4__Spirochaetaceae;D_5__Treponema 2	0	0	0	0	0.0715111	0	0	0	0	0	0	0	0	0	0	0	0	0	0	0	0	0	0	0	0	0	0	0	0	0	0	0	0	0	0
D_0__Bacteria;D_1__Proteobacteria;D_2__Gammaproteobacteria;D_3__Pseudomonadales;D_4__Moraxellaceae;D_5__Enhydrobacter	0	0	0	0	0	0	0	0	0	0	2.30486	0	0	0	0	0	0	0	0	0	0	0	0	0	0	0	0	0	0	0	0	0.0605094	0	0	0
D_0__Bacteria;D_1__Actinobacteria;D_2__Actinobacteria;D_3__Corynebacteriales;D_4__Corynebacteriaceae;D_5__Corynebacterium	0	8.59233	5.61087	0	0	0	0	0	0	0	0	0	0	0	0	0	0	0	0	0	0	0	0	0	0	0	0	0	0	0	0	0	0	0	0
D_0__Bacteria;D_1__Firmicutes;D_2__Clostridia;D_3__Clostridiales;D_4__Lachnospiraceae;D_5__Shuttleworthia	0	0	0	0	0.0440068	0	0	0.143022	0	0	0	0	0	0	0	0	0	0	0	0	0	0	0	0	0	0	0	0	0	0	0	0	0	0	0
D_0__Bacteria;D_1__Firmicutes;D_2__Clostridia;D_3__Clostridiales;D_4__Christensenellaceae;D_5__Catabacter	0	0	0	0	0	0	0	0	0	0	0	0	0	0	0	0	0	0	0	0	0	0	0	0	0	0	0	0	0	0	0	0	0	0	0.0550085
D_0__Bacteria;D_1__Cyanobacteria;D_2__Oxyphotobacteria;D_3__Chloroplast;__;__	0	0	9.62649	0	0	0	0	0	0	0	0	0	0	0	0	0	0	0	0	0	0	0	0	0	0	0	0	0	0	0	0	0	0	0	0
D_0__Bacteria;D_1__Firmicutes;D_2__Clostridia;D_3__Clostridiales;D_4__Clostridiales vadinBB60 group;D_5__uncultured bacterium	0	0	0	0	0.0550085	0	0	0	0	0	0	0	0	0	0	0	0	0	0	0	0	0	0	0	0	0	0	0	0	0	0	0	0	0	0
D_0__Bacteria;D_1__Firmicutes;D_2__Clostridia;D_3__Clostridiales;D_4__Christensenellaceae;D_5__uncultured	0	0	0	0	0	0	0	0.198031	0	0	0	0	0	0	0	0	0	0	0	0	0	0	0	0	0	0	0	0	0	0	0	0.0825128	0	0	0
D_0__Bacteria;D_1__Proteobacteria;D_2__Alphaproteobacteria;D_3__Rhizobiales;D_4__Rhizobiales Incertae Sedis;D_5__Phreatobacter	2.93746	0	0	0	0	0	0	0	0	0	0	0	0	0	0	0.170526	0	0	0	0	0	0	0	0	0	0	0	0	0	0	0	0.0440068	0	0	0
D_0__Bacteria;D_1__Bacteroidetes;D_2__Bacteroidia;D_3__Sphingobacteriales;D_4__Sphingobacteriaceae;D_5__Pedobacter	0	0	0	0	0	0	0	0	0	0	0	0	0	0	0	0	0	0	0	0	0	0	0	0	0	0	0	0	0	0	0	0.0440068	0	0	0.0330051
D_0__Bacteria;D_1__Firmicutes;D_2__Bacilli;D_3__Bacillales;D_4__Family XI;D_5__Gemella	0	0	0	0	0	0	0	0	0	0	0	0	0	0	0	0	0	0	0	0	0	0	0	0	0	0	0	0	0	0	0	0	0	0	0.0440068
D_0__Bacteria;D_1__Firmicutes;D_2__Clostridia;D_3__Clostridiales;D_4__Family XIII;D_5__[Eubacterium] nodatum group	0	0	0	0	0	0	0	0	0	0	0	0	0	0	0	0	0	0	0	0	0	0	0	0	0	0	0	0	0	0	0	0	0	0	0.0440068
D_0__Bacteria;D_1__Firmicutes;D_2__Clostridia;D_3__Clostridiales;D_4__Family XI;D_5__Anaerococcus	0	0	0	0	0	0	0	0	0	0	2.34336	0	0	0	0	0	0	0	0	0	0	0	0	0	0	0	0	0	0	0	0	0	0	0	0
D_0__Bacteria;D_1__Firmicutes;D_2__Clostridia;D_3__Clostridiales;D_4__Family XI;D_5__Finegoldia	0	0	0	0	0	0.0990153	0	0	0	0	0	0	0	0	0	0	0	0	0.346554	0	0	0	0	0	0	0	0	0	0	0	0	0	0	0	0
D_0__Bacteria;D_1__Proteobacteria;D_2__Gammaproteobacteria;D_3__Betaproteobacteriales;D_4__Burkholderiaceae;D_5__Comamonas	0	0	0	0	0	0	0	0	0	0	1.05066	0	0	0	0	0.159525	0	0	0	0	0	0	0	0	0	0	0	0	0	0	0	0	0	0	0
D_0__Bacteria;D_1__Proteobacteria;D_2__Alphaproteobacteria;D_3__Rhizobiales;D_4__Beijerinckiaceae;D_5__Methylobacterium	0	0	0	0	0	0	0	0	0	0	0	0	0	0	0	0.13202	0	0.154024	0	0	0	0	0	0	0	0	0	0	0	0	0	0	0	0	0
D_0__Bacteria;D_1__Bacteroidetes;D_2__Bacteroidia;D_3__Flavobacteriales;D_4__Weeksellaceae;D_5__Cloacibacterium	0	5.03328	0	0	0	0	0	0	0	0	1.16618	0	0	0	0	0	0	0	0	0	0	0	0	0	0	0	0	0	0	0	0	0	0	0	0
D_0__Bacteria;D_1__Tenericutes;D_2__Mollicutes;D_3__Izimaplasmatales;D_4__uncultured organism;D_5__uncultured organism	0	0	0	0	0	0	0	0	0	0	0	0	0	0.0330051	0	0	0	0.12652	0	0	0	0	0	0	0	0	0	0	0	0	0	0	0	0	0
D_0__Bacteria;D_1__Firmicutes;D_2__Bacilli;D_3__Bacillales;D_4__Bacillaceae;D_5__Bacillus	0	0	6.17746	0	0	0	0	0	0	0	0	0	0	0	0	0	0	0	0	0	0	0	0	0	0	0	0	0	0	0	0	0	0	0	0
D_0__Bacteria;D_1__Proteobacteria;D_2__Gammaproteobacteria;D_3__Gammaproteobacteria Incertae Sedis;D_4__Unknown Family;D_5__Acidibacter	0	0	0	0	0	0	0	0	0	0	0	0	0	0	0	0	0	0	0	0	0	0	0	0	0	0	0	0	0	0	0	0.0990153	0	0	0
D_0__Bacteria;D_1__Firmicutes;D_2__Bacilli;D_3__Bacillales;D_4__Listeriaceae;D_5__Brochothrix	0	0	0	0	0	0	0	0	0	0	0	0	0	0	0	0	0.0880136	0	0	0	0	0	0	0	0	0	0	0	0	0	0	0	0	0	0
D_0__Bacteria;D_1__Firmicutes;D_2__Bacilli;D_3__Lactobacillales;D_4__Carnobacteriaceae;D_5__Atopostipes	0	6.38649	2.22234	0	0	0	0	0	0	0	0	0	0	0	0	0	0	0	0	0	0	0	0	0	0	0	0	0	0	0	0	0	0	0	0
D_0__Bacteria;D_1__Firmicutes;D_2__Clostridia;D_3__Clostridiales;D_4__Defluviitaleaceae;D_5__Defluviitaleaceae UCG-011	0	0	0	0	0	0	0	0	0	0	0	0	0	0	0	0.209032	0	0	0	0	0	0	0	0	0	0	0	0	0	0	0	0	0	0	0
D_0__Bacteria;D_1__Proteobacteria;D_2__Gammaproteobacteria;D_3__Pseudomonadales;D_4__Moraxellaceae;D_5__Psychrobacter	0	0	0	0	0	0	0	0	0	0	0	0	0	0	0	0	0.0715111	0	0	0	0	0	0	0	0	0	0	0	0	0	0	0	0	0	0
D_0__Bacteria;D_1__Firmicutes;D_2__Clostridia;D_3__Clostridiales;D_4__Clostridiales vadinBB60 group;D_5__uncultured organism	0	0	0	0	0	0	0	0	0	0	0	0	0	0	0	0	0.0715111	0	0	0	0	0	0	0	0	0	0	0	0	0	0	0	0	0	0
D_0__Bacteria;D_1__Firmicutes;D_2__Bacilli;D_3__Bacillales;D_4__Bacillaceae;D_5__Anoxybacillus	0	0	0	0	0	0	0	0	0	0	0	0	0	0	0	0	0	0.170526	0	0	0	0	0	0	0	0	0	0	0	0	0	0	0	0	0
D_0__Bacteria;D_1__Proteobacteria;D_2__Gammaproteobacteria;D_3__Vibrionales;D_4__Vibrionaceae;D_5__Vibrio	0	0	0	0	0	0	0	0	0	0	0	0	0	0	0	0	0	0	0	0	0	0	0	0	0	0	0	0	0	0	0	0.0660102	0	0	0
D_0__Bacteria;D_1__Entotheonellaeota;D_2__Entotheonellia;D_3__Entotheonellales;D_4__Entotheonellaceae;D_5__uncultured bacterium	0	0	0	0.0715111	0	0	0	0	0	0	0	0	0	0	0	0	0	0	0	0	0	0	0	0	0	0	0	0	0	0	0	0	0	0	0
D_0__Bacteria;D_1__Firmicutes;D_2__Clostridia;D_3__Clostridiales;D_4__Clostridiales vadinBB60 group;D_5__gut metagenome	0	0	0	0	0	0	0	0	0	0	0	0	0	0.038506	0	0	0	0	0	0	0	0	0	0	0	0	0	0	0	0	0	0	0	0	0
D_0__Bacteria;D_1__Firmicutes;D_2__Clostridia;D_3__Clostridiales;D_4__Ruminococcaceae;D_5__Candidatus Soleaferrea	0	0	0	0	0	0	0	0	0	0	0	0	0	0	0	0	0	0	0	0	0	0	0	0	0	0	0	0	0	0	0	0.0550085	0	0	0
D_0__Bacteria;D_1__Firmicutes;D_2__Clostridia;D_3__Clostridiales;D_4__Ruminococcaceae;D_5__Ruminiclostridium	0	0	0	0	0	0	0	0	0	0	0	0	0	0	0	0	0.0495077	0	0	0	0	0	0	0	0	0	0	0	0	0	0	0	0	0	0
D_0__Bacteria;D_1__Firmicutes;D_2__Bacilli;D_3__Lactobacillales;D_4__Carnobacteriaceae;D_5__Alloiococcus	0	0	0	0	0	0	0	0	0	0	0	0	0	0	0	0	0.0495077	0	0	0	0	0	0	0	0	0	0	0	0	0	0	0	0	0	0
D_0__Bacteria;D_1__Firmicutes;D_2__Clostridia;D_3__Clostridiales;D_4__Ruminococcaceae;D_5__Angelakisella	0	0	0	0	0	0	0	0	0	0	0	0	0	0	0	0	0.0495077	0	0	0	0	0	0	0	0	0	0	0	0	0	0	0	0	0	0
D_0__Bacteria;D_1__Firmicutes;D_2__Erysipelotrichia;D_3__Erysipelotrichales;D_4__Erysipelotrichaceae;D_5__Faecalitalea	0	0	0	0	0	0	0	0.159525	0	0	0	0	0	0	0	0	0	0	0	0	0	0	0	0	0	0	0	0	0	0	0	0	0	0	0
D_0__Bacteria;D_1__Bacteroidetes;D_2__Bacteroidia;D_3__Chitinophagales;D_4__Chitinophagaceae;D_5__Chitinophaga	0	0	0	0	0	0	0	0	0	0	0	0	0	0	0	0	0	0	0	0	0	0	0	0	0	0	0	0	0	0	0	0.0495077	0	0	0
D_0__Bacteria;D_1__Proteobacteria;D_2__Gammaproteobacteria;D_3__Oceanospirillales;D_4__Halomonadaceae;D_5__Halomonas	0	0	0	0	0	0	0	0	0	0	0	0	0	0	0	0	0	0	0	0	0	0	0	0	0	0	0	0	0	0	0	0.0495077	0	0	0
D_0__Bacteria;D_1__Actinobacteria;D_2__Coriobacteriia;D_3__Coriobacteriales;D_4__Eggerthellaceae;D_5__Eggerthella	0	0	0	0.0550085	0	0	0	0	0	0	0	0	0	0	0	0	0	0	0	0	0	0	0	0	0	0	0	0	0	0	0	0	0	0	0
D_0__Bacteria;D_1__Proteobacteria;D_2__Gammaproteobacteria;D_3__Salinisphaerales;D_4__Solimonadaceae;D_5__Nevskia	0	0	2.83294	0	0	0	0	0	0	0	0	0	0	0	0	0	0	0	0	0	0	0	0	0	0	0	0	0	0	0	0	0	0	0	0
D_0__Bacteria;D_1__Actinobacteria;D_2__Actinobacteria;D_3__Corynebacteriales;D_4__Corynebacteriaceae;D_5__Turicella	0	0	0	0.0495077	0	0	0	0	0	0	0	0	0	0	0	0	0	0	0	0	0	0	0	0	0	0	0	0	0	0	0	0	0	0	0
D_0__Bacteria;D_1__Fusobacteria;D_2__Fusobacteriia;D_3__Fusobacteriales;D_4__Leptotrichiaceae;D_5__Leptotrichia	0	0	0	0	0	0	0	0	0	0	0	0	0	0	0	0	0	0	0	0	0	0	0	0	0	0	0	0	0	0	0	0.0440068	0	0	0
D_0__Bacteria;D_1__Proteobacteria;D_2__Alphaproteobacteria;D_3__Caulobacterales;D_4__Caulobacteraceae;D_5__uncultured	0	0	0	0	0	0	0	0	0	0	0	0	0	0	0	0	0	0	0	0	0	0	0	0	0	0	0	0	0	0	0	0.0440068	0	0	0
D_0__Bacteria;D_1__Proteobacteria;D_2__Deltaproteobacteria;D_3__Myxococcales;D_4__Polyangiaceae;D_5__Pajaroellobacter	0	0	0	0	0	0	0	0	0	0	0	0	0	0	0	0	0	0	0	0	0	0	0	0	0	0	0	0	0	0	0	0.0440068	0	0	0
D_0__Bacteria;D_1__Bacteroidetes;D_2__Bacteroidia;D_3__Bacteroidales;D_4__Porphyromonadaceae;D_5__Porphyromonas	3.47104	0	0	0	0	0	0	0	0	0	0	0	0	0	0	0	0	0	0	0	0	0	0	0	0	0	0	0	0	0	0	0	0	0	0
D_0__Bacteria;D_1__Acidobacteria;D_2__Subgroup 6;D_3__Unknown Order;D_4__Unknown Family;D_5__Luteitalea	0	0	0	0	0	0	0	0	0	0.786622	0	0	0	0	0	0	0	0	0	0	0	0	0	0	0	0	0	0	0	0	0	0	0	0	0
D_0__Bacteria;D_1__Firmicutes;D_2__Clostridia;D_3__Clostridiales;D_4__Lachnospiraceae;D_5__Lachnospiraceae NK4B4 group	0	0	0	0	0	0	0	0	0	0	0	0.0495077	0	0	0	0	0	0	0	0	0	0	0	0	0	0	0	0	0	0	0	0	0	0	0
D_0__Bacteria;D_1__Bacteroidetes;D_2__Bacteroidia;D_3__Flavobacteriales;D_4__Flavobacteriaceae;D_5__Capnocytophaga	0	0	0	0	0	0	0.176027	0	0	0	0	0	0	0	0	0	0	0	0	0	0	0	0	0	0	0	0	0	0	0	0	0	0	0	0
D_0__Bacteria;D_1__Synergistetes;D_2__Synergistia;D_3__Synergistales;D_4__Synergistaceae;D_5__Cloacibacillus	0	0	0	0	0	0	0.170526	0	0	0	0	0	0	0	0	0	0	0	0	0	0	0	0	0	0	0	0	0	0	0	0	0	0	0	0
D_0__Bacteria;D_1__Proteobacteria;D_2__Gammaproteobacteria;D_3__Betaproteobacteriales;D_4__Neisseriaceae;D_5__Kingella	0	0	0	0	0	0	0	0	0	0	0	0	0	0	0	0	0	0	0	0	0	0	0	0	0	0	0	0	0	0	0	0.038506	0	0	0
D_0__Bacteria;D_1__Proteobacteria;D_2__Gammaproteobacteria;D_3__Cellvibrionales;D_4__Cellvibrionaceae;D_5__Cellvibrio	2.93195	0	0	0	0	0	0	0	0	0	0	0	0	0	0	0	0	0	0	0	0	0	0	0	0	0	0	0	0	0	0	0	0	0	0
D_0__Bacteria;D_1__Actinobacteria;D_2__Actinobacteria;D_3__Corynebacteriales;D_4__Nocardiaceae;D_5__Gordonia	0	0	0	0	0	0	0	0	0	0	0.665603	0	0	0	0	0	0	0	0	0	0	0	0	0	0	0	0	0	0	0	0	0	0	0	0
D_0__Bacteria;D_1__Firmicutes;D_2__Bacilli;D_3__Lactobacillales;D_4__Aerococcaceae;D_5__Aerosphaera	0	0	0	0	0	0.0990153	0	0	0	0	0	0	0	0	0	0	0	0	0	0	0	0	0	0	0	0	0	0	0	0	0	0	0	0	0

## Sheet: Table_S6
taxonomy	CT15_ratio	CT15_Cntrl_Mean	CT15_Cntrl_Std	CT15_Cntrl_CV	CT15_MEM_Mean	CT15_MEM_Std	CT15_MEM_CV	CT17_ratio	CT17_Cntrl_Mean	CT17_Cntrl_Std	CT17_Cntrl_CV	CT17_MEM_Mean	CT17_MEM_Std	CT17_MEM_CV	CT18_ratio	CT18_Cntrl_Mean	CT18_Cntrl_Std	CT18_Cntrl_CV	CT18_MEM_Mean	CT18_MEM_Std	CT18_MEM_CV	CT19_ratio	CT19_Cntrl_Mean	CT19_Cntrl_Std	CT19_Cntrl_CV	CT19_MEM_Mean	CT19_MEM_Std	CT19_MEM_CV
D_0__Bacteria;D_1__Firmicutes;D_2__Cntrllostridia;D_3__Cntrllostridiales;D_4__Lachnospiraceae;D_5__Blautia	0.286638	13.6586	1.87523	13.7293	16.6607	2.20599	13.2407	-0.670246	9.15204	1.26282	13.7983	5.75114	1.10873	19.2784	-0.645128	10.8243	0.577018	5.33076	6.92145	0.696813	10.0674	-0.0515776	37.3962	1.80318	4.82183	36.0828	5.58223	15.4706
D_0__Bacteria;D_1__Firmicutes;D_2__Cntrllostridia;D_3__Cntrllostridiales;D_4__Lachnospiraceae;D_5__Anaerostipes	-1.94138	37.3742	6.24113	16.6991	9.73101	1.04216	10.7097	-1.09331	1.31745	0.175619	13.3301	0.617471	0.251551	40.739	-0.257298	0.345179	0.0540898	15.6701	0.288795	0.0670901	23.2311	-1.18081	15.2827	1.24694	8.15916	6.74129	4.24974	63.0404
D_0__Bacteria;D_1__Bacteroidetes;D_2__Bacteroidia;D_3__Bacteroidales;D_4__Bacteroidaceae;D_5__Bacteroides	-0.351482	13.7508	2.1498	15.634	10.7775	5.13462	47.6419	0.049596	20.1317	3.63394	18.0508	20.8359	1.09574	5.25893	0.407789	16.3265	1.34677	8.24897	21.6596	4.29338	19.822	-0.114431	7.268	0.72937	10.0354	6.71379	2.08264	31.0203
D_0__Bacteria;D_1__Verrucomicrobia;D_2__Verrucomicrobiae;D_3__Verrucomicrobiales;D_4__Akkermansiaceae;D_5__Akkermansia	1.76296	0.136146	0.147058	108.015	0.462072	0.469236	101.55	0.63743	0.0123769	0.0214375	173.205	0.019253	0.0333471	173.205	1.63982	0.413939	0.0600545	14.508	1.28995	0.139677	10.8281	0.971618	11.8598	0.778259	6.56214	23.2576	2.95791	12.718
D_0__Bacteria;D_1__Firmicutes;D_2__Cntrllostridia;D_3__Cntrllostridiales;D_4__Ruminococcaceae;D_5__Faecalibacterium	-4.18821	9.82727	0.994982	10.1247	0.539084	0.541101	100.374	-0.727826	9.23318	1.73064	18.7437	5.57511	0.724198	12.9898	-0.522487	9.3377	0.259489	2.77894	6.50063	0.942376	14.4967	-1.04207	3.78046	0.322431	8.52888	1.83591	0.850201	46.3095
D_0__Bacteria;D_1__Firmicutes;D_2__Cntrllostridia;D_3__Cntrllostridiales;D_4__Lachnospiraceae;D_5__[Ruminococcus] torques group	1.53955	0.917267	0.454718	49.5731	2.66654	1.18934	44.6023	-0.447551	5.90379	0.796336	13.4886	4.32917	0.788831	18.2213	-0.156212	6.13758	0.701347	11.4271	5.50773	0.952715	17.2978	-1.32487	2.02569	0.228679	11.2889	0.808625	0.133275	16.4817
D_0__Bacteria;D_1__Firmicutes;D_2__Cntrllostridia;D_3__Cntrllostridiales;D_4__Lachnospiraceae;D_5__Agathobacter	#NAME?	0.0302547	0.0524027	173.205	0	0		-0.0556036	2.50976	0.160016	6.37574	2.41487	1.15223	47.7138	-0.0926179	3.229	0.464114	14.3733	3.02822	0.604312	19.956	-1.24835	2.95671	0.66454	22.4757	1.24457	0.340706	27.3755
D_0__Bacteria;D_1__Firmicutes;D_2__Negativicutes;D_3__Selenomonadales;D_4__Acidaminococcaceae;D_5__Phascolarctobacterium	2.55254	0.0412564	0.0541073	131.149	0.242038	0.310494	128.283	0.749258	1.89642	0.400173	21.1015	3.18774	0.612777	19.2229	0.196232	1.31195	0.1738	13.2474	1.50311	0.262442	17.46	0.346129	2.29248	0.228049	9.9477	2.91408	1.23594	42.4127
D_0__Bacteria;D_1__Proteobacteria;D_2__Gammaproteobacteria;D_3__Enterobacteriales;D_4__Enterobacteriaceae;__		0	0		0	0			0	0		0	0		-0.590469	8.30354	0.699901	8.42895	5.5146	2.05754	37.3108		0	0		0	0
D_0__Bacteria;D_1__Firmicutes;D_2__Cntrllostridia;D_3__Cntrllostridiales;D_4__Ruminococcaceae;D_5__Subdoligranulum	0.670405	2.65966	0.55736	20.9561	4.23291	1.48983	35.1964	0.401932	3.53567	0.498342	14.0947	4.6716	0.457388	9.79083	-0.0495032	3.34314	0.240041	7.18009	3.23038	0.459977	14.2391	0.170547	1.06304	0.0590381	5.55371	1.19644	0.147629	12.3391
D_0__Bacteria;D_1__Bacteroidetes;D_2__Bacteroidia;D_3__Bacteroidales;D_4__Rikenellaceae;D_5__Alistipes	2.7891	0.515705	0.19915	38.617	3.56455	1.72023	48.2593	1.5287	2.10958	0.116073	5.5022	6.08669	0.192549	3.16345	0.40184	2.07657	0.252845	12.1761	2.74355	0.713325	26.0001	1.54629	1.09192	0.149108	13.6556	3.18912	1.02663	32.1917
D_0__Bacteria;D_1__Firmicutes;D_2__Cntrllostridia;D_3__Cntrllostridiales;D_4__Lachnospiraceae;D_5__Lachnoclostridium	2.16015	0.248914	0.168894	67.8524	1.11255	0.651362	58.5469	0.315732	0.770119	0.193236	25.0917	0.958524	0.271203	28.2938	0.301248	0.734364	0.0832884	11.3416	0.90489	0.0816372	9.02178	-0.401788	1.1428	0.0753612	6.59442	0.865009	0.134258	15.521
D_0__Bacteria;D_1__Bacteroidetes;D_2__Bacteroidia;D_3__Bacteroidales;D_4__Tannerellaceae;D_5__Parabacteroides		0	0		0	0		1.11379	2.79856	0.13831	4.94218	6.05644	0.508688	8.39912	1.3873	1.4536	0.190093	13.0774	3.80246	0.696465	18.3161	1.00412	0.481325	0.107829	22.4026	0.9654	0.323207	33.4791
D_0__Bacteria;D_1__Firmicutes;D_2__Cntrllostridia;D_3__Cntrllostridiales;D_4__Lachnospiraceae;__	1.54855	0.735739	0.0278799	3.78937	2.15221	1.21185	56.3073	-0.480762	0.339678	0.0365662	10.765	0.243413	0.0585234	24.0429	0.464129	2.18521	0.276425	12.6498	3.01447	0.586622	19.4602	-0.356792	0.489576	0.0862775	17.6229	0.382309	0.071564	18.7189
D_0__Bacteria;D_1__Firmicutes;D_2__Negativicutes;D_3__Selenomonadales;D_4__Veillonellaceae;D_5__Megamonas		0	0		0	0			0	0		0	0		-0.561394	4.09126	0.457967	11.1938	2.77243	0.383662	13.8385		0	0		0	0
D_0__Bacteria;D_1__Firmicutes;D_2__Bacilli;D_3__Lactobacillales;D_4__Streptococcaceae;D_5__Streptococcus	2.10692	0.268167	0.0480144	17.9047	1.15518	0.411297	35.6046	1.26946	0.0770119	0.0521857	67.7631	0.185654	0.12098	65.1641	-0.675966	3.57693	0.503025	14.0631	2.23885	0.545098	24.3473	0.741688	0.083888	0.0617928	73.6611	0.140272	0.121611	86.6968
D_0__Bacteria;D_1__Firmicutes;D_2__Cntrllostridia;D_3__Cntrllostridiales;D_4__Lachnospiraceae;D_5__Dorea	1.12072	2.06419	0.270001	13.0802	4.4887	2.18661	48.7137	-1.24097	5.19418	1.35135	26.0167	2.19759	0.501159	22.8049	-0.0311644	2.50976	0.339215	13.5158	2.45613	0.437612	17.8171		0	0		0	0
D_0__Bacteria;D_1__Firmicutes;D_2__Cntrllostridia;D_3__Cntrllostridiales;D_4__Lachnospiraceae;D_5__Lachnospira		0	0		0	0		inf	0	0		0.0398812	0.0690762	173.205	1.05367	1.88679	0.194523	10.3097	3.91661	0.479364	12.2393	-1.73697	0.0550085	0.0102912	18.7083	0.0165026	0.0285833	173.205
D_0__Bacteria;D_1__Firmicutes;D_2__Cntrllostridia;D_3__Cntrllostridiales;D_4__Ruminococcaceae;D_5__Ruminococcaceae UCG-002	-0.512602	0.574839	0.149917	26.0798	0.402937	0.423483	105.099	-0.65507	1.23219	0.148777	12.0742	0.782496	0.441362	56.4044	-0.911644	0.26129	0.0184504	7.06127	0.138897	0.0273318	19.6778	-0.608517	0.679355	0.124257	18.2905	0.445569	0.125076	28.0712
D_0__Bacteria;D_1__Proteobacteria;D_2__Gammaproteobacteria;D_3__Betaproteobacteriales;D_4__Burkholderiaceae;D_5__Sutterella	1.75489	0.0110017	0.0190555	173.205	0.0371308	0.0643124	173.205	#NAME?	0.0110017	0.0190555	173.205	0	0		1.49197	0.389185	0.0278799	7.16365	1.09467	0.0803765	7.34253	0.355659	0.639474	0.0764574	11.9563	0.818252	0.314136	38.3911
D_0__Bacteria;D_1__Firmicutes;D_2__Cntrllostridia;D_3__Cntrllostridiales;D_4__Lachnospiraceae;D_5__Lachnospiraceae NK4A136 group	0.742132	0.306673	0.101384	33.0594	0.512955	0.512988	100.006	0.61405	1.35046	0.324539	24.0317	2.06695	0.470675	22.7715	-0.797811	0.155399	0.0346543	22.3002	0.0893889	0.0774405	86.6333	-0.662965	0.653226	0.0737376	11.2882	0.412564	0.155733	37.7477
D_0__Bacteria;D_1__Firmicutes;D_2__Cntrllostridia;D_3__Cntrllostridiales;D_4__Lachnospiraceae;D_5__Cntrloprococcus 1	0.753253	0.314924	0.236804	75.1942	0.530832	0.548991	103.421	-0.674759	0.957148	0.151997	15.8802	0.599593	0.109811	18.3142	-0.508697	0.481325	0.100569	20.8943	0.338302	0.0513822	15.1882	-1.1148	0.48545	0.0675256	13.9099	0.22416	0.0556069	24.8068
D_0__Bacteria;D_1__Firmicutes;D_2__Negativicutes;D_3__Selenomonadales;D_4__Veillonellaceae;D_5__Megasphaera		0	0		0	0			0	0		0	0		0.13489	1.79603	0.205105	11.4199	1.97206	0.225216	11.4204		0	0		0	0
D_0__Bacteria;D_1__Firmicutes;D_2__Cntrllostridia;D_3__Cntrllostridiales;D_4__Lachnospiraceae;D_5__Roseburia	#NAME?	0.288795	0.145357	50.3322	0	0		-3.53667	1.2927	0.246466	19.066	0.111392	0.127019	114.029	-2.93529	1.19919	0.151897	12.6667	0.156774	0.0595644	37.9937	-3.1375	0.302547	0.0593735	19.6246	0.0343803	0.0217875	63.3719
D_0__Bacteria;D_1__Firmicutes;D_2__Cntrllostridia;D_3__Cntrllostridiales;D_4__Lachnospiraceae;D_5__CntrlAG-56		0	0		0	0		-0.484655	2.5689	0.429208	16.7078	1.83591	0.11018	6.0014	0.312744	1.17031	0.0750594	6.41366	1.4536	0.28571	19.6554	-0.841302	0.0591342	0.0195938	33.1344	0.0330051	0.0364885	110.554
D_0__Bacteria;D_1__Firmicutes;D_2__Erysipelotrichia;D_3__Erysipelotrichales;D_4__Erysipelotrichaceae;D_5__Erysipelotrichaceae UCG-003	1.26985	0.605094	0.0790478	13.0637	1.4591	0.843134	57.7844	0.698511	0.554211	0.257172	46.4033	0.899389	0.114366	12.716	-0.0733222	1.69289	0.114556	6.76691	1.609	0.197591	12.2804		0	0		0	0
D_0__Bacteria;D_1__Firmicutes;D_2__Cntrllostridia;D_3__Cntrllostridiales;D_4__Ruminococcaceae;D_5__uncultured	inf	0	0		0.0302547	0.0524027	173.205	-0.819428	0.165026	0.0551459	33.4166	0.0935145	0.0748197	80.0087	0.86688	1.31058	0.0894946	6.82863	2.39012	0.303757	12.7089	0.812914	0.0508829	0.0316896	62.2796	0.0893889	0.0410496	45.9225
D_0__Bacteria;D_1__Firmicutes;D_2__Negativicutes;D_3__Selenomonadales;D_4__Acidaminococcaceae;D_5__Acidaminococcus		0	0		0	0			0	0		0	0		-0.160846	1.22531	0.111681	9.11443	1.09604	0.218148	19.9032	-0.275634	0.189779	0.0238194	12.5511	0.156774	0.0158	10.0782
D_0__Bacteria;D_1__Bacteroidetes;D_2__Bacteroidia;D_3__Bacteroidales;D_4__Marinifilaceae;D_5__Odoribacter		0	0		0	0		-0.0628999	0.805875	0.118524	14.7075	0.771495	0.254719	33.0163	-0.332196	0.38781	0.052834	13.6237	0.308048	0.0431388	14.0039	0.27486	0.334177	0.12321	36.8698	0.404313	0.13353	33.0265
D_0__Bacteria;D_1__Proteobacteria;D_2__Gammaproteobacteria;D_3__Pasteurellales;D_4__Pasteurellaceae;D_5__Haemophilus	inf	0	0		0.0701359	0.121479	173.205	2.4021	0.00962649	0.0166736	173.205	0.0508829	0.0526726	103.517	0.494926	1.18956	1.03641	87.1258	1.67638	1.02924	61.3961	#NAME?	0.00825128	0.0142916	173.205	0	0
D_0__Bacteria;D_1__Firmicutes;D_2__Cntrllostridia;D_3__Cntrllostridiales;D_4__Lachnospiraceae;D_5__Fusicatenibacter	-1.35789	1.08917	0.362577	33.2893	0.424941	0.523266	123.139	-0.904164	3.54392	0.686554	19.3727	1.89367	0.222644	11.7573	-0.720755	0.811376	0.0972033	11.9801	0.492326	0.0669773	13.6042	-0.5603	0.119644	0.0183991	15.3783	0.0811376	0.0214375	26.4211
D_0__Bacteria;D_1__Firmicutes;D_2__Erysipelotrichia;D_3__Erysipelotrichales;D_4__Erysipelotrichaceae;D_5__Holdemanella		0	0		0	0			0	0		0	0			0	0		0	0		0.247462	0.448319	0.198126	44.1931	0.532207	0.179827	33.7889
D_0__Bacteria;D_1__Firmicutes;D_2__Cntrllostridia;D_3__Cntrllostridiales;D_4__Ruminococcaceae;D_5__Ruminiclostridium 5	1.03361	0.408438	0.151367	37.06	0.83613	0.959493	114.754	0.71386	0.294296	0.0574964	19.537	0.4827	0.0700549	14.5131	0.716207	0.038506	0.0252081	65.4654	0.0632598	0.0340209	53.7796	0.247251	0.463447	0.0355167	7.6636	0.550085	0.0610074	11.0905
D_0__Bacteria;D_1__Firmicutes;D_2__Cntrllostridia;D_3__Cntrllostridiales;D_4__Ruminococcaceae;D_5__Ruminococcaceae UCG-005	4.13955	0.0110017	0.0190555	173.205	0.193905	0.335853	173.205	0.3818	0.649101	0.0318385	4.90502	0.845756	0.28921	34.1955	0.882348	0.114143	0.0273318	23.9453	0.210408	0.0491049	23.338	-0.550611	0.342428	0.205469	60.0035	0.233786	0.123769	52.9412
D_0__Bacteria;D_1__Firmicutes;D_2__Cntrllostridia;D_3__Cntrllostridiales;D_4__Lachnospiraceae;D_5__[Eubacterium] hallii group	inf	0	0		0.0440068	0.076222	173.205	-0.578579	1.24044	0.0768645	6.19654	0.830629	0.831038	100.049	-0.0307695	1.17306	0.128028	10.914	1.1483	0.131237	11.4288		0	0		0	0
D_0__Bacteria;D_1__Firmicutes;D_2__Cntrllostridia;D_3__Cntrllostridiales;D_4__Lachnospiraceae;D_5__Cntrloprococcus 3	1.53775	0.925518	0.245432	26.5183	2.68717	1.20278	44.7601	-0.795382	0.57759	0.039476	6.83462	0.332802	0.227023	68.2156		0	0		0	0		-0.70044	0.393311	0.0357555	9.09091	0.242038	0.0701224	28.9717
D_0__Bacteria;D_1__Bacteroidetes;D_2__Bacteroidia;D_3__Bacteroidales;D_4__Barnesiellaceae;D_5__Barnesiella		0	0		0	0		1.13289	0.783872	0.0917588	11.7058	1.71902	0.61647	35.8618		0	0		0	0		0.468387	0.401562	0.0458588	11.4201	0.555586	0.157328	28.3175
D_0__Bacteria;D_1__Firmicutes;D_2__Cntrllostridia;D_3__Cntrllostridiales;D_4__Ruminococcaceae;D_5__[Eubacterium] coprostanoligenes group	#NAME?	0.0165026	0.0285833	173.205	0	0		0.633872	0.0398812	0.0237797	59.6263	0.0618846	0.0643124	103.923	1.13993	0.0742615	0.00275043	3.7037	0.16365	0.0426759	26.0775	0.0478285	0.367182	0.078988	21.512	0.379559	0.0495077	13.0435
D_0__Bacteria;D_1__Firmicutes;D_2__Cntrllostridia;D_3__Cntrllostridiales;D_4__Lachnospiraceae;D_5__GCA-900066575	#NAME?	1.78915	0.407163	22.7573	0	0		#NAME?	0.0591342	0.00599442	10.137	0	0			0	0		0	0		-5.32707	0.386435	0.0415988	10.7648	0.00962649	0.0166736	173.205
D_0__Bacteria;D_1__Actinobacteria;D_2__Cntrloriobacteriia;D_3__Cntrloriobacteriales;D_4__Cntrloriobacteriaceae;D_5__Cntrlollinsella	-1.93411	0.294296	0.114696	38.9732	0.0770119	0.133389	173.205	#NAME?	1.10292	0.1604	14.5432	0	0		#NAME?	0.346554	0.0723524	20.8777	0	0		-4.48727	0.215908	0.0745538	34.5303	0.00962649	0.0166736	173.205
D_0__Bacteria;D_1__Firmicutes;D_2__Cntrllostridia;D_3__Cntrllostridiales;D_4__Lachnospiraceae;D_5__Lachnospiraceae ND3007 group	1.14954	0.402937	0.0983542	24.4093	0.893889	0.957184	107.081	-5.51833	0.378184	0.0568181	15.0239	0.00825128	0.0142916	173.205	-1.69938	0.468948	0.0432045	9.21307	0.144397	0.0264885	18.3442	-2.47947	0.199406	0.046085	23.1112	0.0357555	0.0376115	105.191
D_0__Bacteria;D_1__Proteobacteria;D_2__Alphaproteobacteria;D_3__Rhodospirillales;D_4__uncultured;D_5__Azospirillum sp. 47_25		0	0		0	0		0.447185	1.44947	0.2054	14.1706	1.97618	0.248221	12.5606	0.364073	0.732989	0.0428528	5.84632	0.943396	0.0909306	9.63864		0	0		0	0
D_0__Bacteria;D_1__Proteobacteria;D_2__Deltaproteobacteria;D_3__Desulfovibrionales;D_4__Desulfovibrionaceae;D_5__Bilophila		0	0		0	0		1.19265	0.16365	0.0195938	11.9729	0.374058	0.0681529	18.2199	1.17922	0.259915	0.0914181	35.1723	0.588591	0.136139	23.1297	0.69411	0.169151	0.0632449	37.3895	0.273667	0.0811609	29.6568
D_0__Bacteria;D_1__Firmicutes;D_2__Cntrllostridia;D_3__Cntrllostridiales;D_4__Ruminococcaceae;D_5__Anaerotruncus		0	0		0	0			0	0		0	0			0	0		0	0		-0.142019	0.264041	0.0647373	24.5179	0.239287	0.109638	45.8187
D_0__Bacteria;D_1__Firmicutes;D_2__Cntrllostridia;D_3__Cntrllostridiales;D_4__Cntrlhristensenellaceae;D_5__Cntrlhristensenellaceae R-7 group	0.326651	0.167776	0.116464	69.4161	0.210408	0.364437	173.205	-1.61807	0.848507	0.136936	16.1384	0.276418	0.203397	73.5831		0	0		0	0		-1.1836	0.218659	0.0644299	29.4659	0.0962649	0.0314801	32.7015
D_0__Bacteria;D_1__Firmicutes;D_2__Cntrllostridia;D_3__Cntrllostridiales;D_4__Lachnospiraceae;D_5__[Ruminococcus] gauvreauii group		0	0		0	0		-1.40004	2.06144	0.452215	21.9368	0.781121	0.237462	30.4002	-0.239188	0.495077	0.103863	20.9791	0.41944	0.0711266	16.9575		0	0		0	0
D_0__Bacteria;D_1__Firmicutes;D_2__Cntrllostridia;D_3__Cntrllostridiales;D_4__Ruminococcaceae;D_5__Negativibacillus		0	0		0	0			0	0		0	0		-0.157541	0.0797624	0.0137521	17.2414	0.0715111	0.00673714	9.42111	-0.26628	0.244788	0.0162717	6.64728	0.203532	0.0814052	39.9963
D_0__Bacteria;D_1__Cntrlyanobacteria;D_2__Melainabacteria;D_3__Gastranaerophilales;D_4__Cntrllostridium sp. CAG:306;D_5__Cntrllostridium sp. CAG:306		0	0		0	0			0	0		0	0		-4.83422	0.745366	0.135889	18.2312	0.0261291	0.0278799	106.701	#NAME?	0.0728863	0.0105632	14.4927	0	0
D_0__Bacteria;D_1__Firmicutes;D_2__Cntrllostridia;D_3__Cntrllostridiales;D_4__Ruminococcaceae;D_5__Ruminococcaceae UCG-013		0	0		0	0		0.893085	0.0673854	0.0247156	36.678	0.125144	0.0894946	71.5131	0.287098	0.449695	0.0415988	9.25045	0.54871	0.0899162	16.3868	-0.0874628	0.0701359	0.0152519	21.7462	0.0660102	0.0496602	75.2311
D_0__Bacteria;D_1__Fusobacteria;D_2__Fusobacteriia;D_3__Fusobacteriales;D_4__Fusobacteriaceae;D_5__Fusobacterium		0	0		0	0			0	0		0	0		-0.727345	0.753617	0.165346	21.9403	0.455196	0.153452	33.7112	#NAME?	0.0110017	0.0190555	173.205	0	0
D_0__Bacteria;D_1__Firmicutes;D_2__Negativicutes;D_3__Selenomonadales;D_4__Veillonellaceae;D_5__Veillonella	#NAME?	0.0948897	0.0817182	86.1192	0	0		inf	0	0		0.0508829	0.0881317	173.205	-0.462063	0.471698	0.108031	22.9025	0.342428	0.0507713	14.8268	#NAME?	0.136146	0.185786	136.461	0	0
D_0__Bacteria;D_1__Firmicutes;D_2__Cntrllostridia;D_3__Cntrllostridiales;D_4__Ruminococcaceae;D_5__Ruminococcaceae UCG-003		0	0		0	0		-3.61738	0.185654	0.0131187	7.06622	0.0151273	0.0262013	173.205		0	0		0	0		-0.454176	0.188404	0.068416	36.3134	0.137521	0.155733	113.243
D_0__Bacteria;D_1__Firmicutes;D_2__Cntrllostridia;D_3__Cntrllostridiales;D_4__Cntrllostridiaceae 1;D_5__Sarcina		0	0		0	0			0	0		0	0			0	0		0	0		-1.38904	0.22691	0.0464122	20.454	0.0866384	0.0292051	33.7091
D_0__Bacteria;D_1__Actinobacteria;D_2__Cntrloriobacteriia;D_3__Cntrloriobacteriales;D_4__Eggerthellaceae;D_5__Senegalimassilia		0	0		0	0			0	0		0	0			0	0		0	0		-3.22542	0.218659	0.0592939	27.1171	0.0233786	0.040493	173.205
D_0__Bacteria;D_1__Actinobacteria;D_2__Cntrloriobacteriia;D_3__Cntrloriobacteriales;D_4__Eggerthellaceae;D_5__uncultured		0	0		0	0			0	0		0	0			0	0		0	0		-0.62532	0.199406	0.0131187	6.57889	0.12927	0.0742615	57.4468
D_0__Bacteria;D_1__Firmicutes;D_2__Bacilli;D_3__Lactobacillales;D_4__Lactobacillaceae;D_5__Lactobacillus		0	0		0	0		-0.0684202	2.31586	0.27748	11.9817	2.20859	0.433844	19.6435	-0.95109	0.239287	0.0834699	34.8827	0.123769	0.0680974	55.0196		0	0		0	0
D_0__Bacteria;D_1__Firmicutes;D_2__Cntrllostridia;D_3__Cntrllostridiales;D_4__Lachnospiraceae;D_5__Lachnospiraceae FCS020 group	-1.70543	0.497827	0.0945203	18.9866	0.152649	0.264395	173.205	-1.64155	0.107267	0.0119888	11.1767	0.0343803	0.0595485	173.205	-0.24483	0.519831	0.0562998	10.8304	0.438693	0.0981232	22.3672		0	0		0	0
D_0__Bacteria;D_1__Firmicutes;D_2__Cntrllostridia;D_3__Cntrllostridiales;D_4__Lachnospiraceae;D_5__Marvinbryantia	#NAME?	0.12927	0.0423423	32.7549	0	0		0.183066	0.233786	0.0340209	14.5521	0.265416	0.0920777	34.6918		0	0		0	0		-1.78022	0.217284	0.057759	26.5823	0.0632598	0.0498882	78.8624
D_0__Bacteria;D_1__Firmicutes;D_2__Cntrllostridia;D_3__Cntrllostridiales;D_4__Ruminococcaceae;D_5__Ruminococcaceae UCG-004	#NAME?	0.0110017	0.0190555	173.205	0	0		0.552541	0.350679	0.0720774	20.5537	0.51433	0.191683	37.2685	#NAME?	0.0110017	0.0190555	173.205	0	0		0.0954196	0.1609	0.0267725	16.6392	0.171902	0.0857829	49.9023
D_0__Bacteria;D_1__Cntrlyanobacteria;D_2__Melainabacteria;D_3__Gastranaerophilales;__;__		0	0		0	0			0	0		0	0			0	0		0	0		-1.35147	0.203532	0.0327751	16.1032	0.0797624	0.0359665	45.0921
D_0__Bacteria;D_1__Firmicutes;D_2__Cntrllostridia;D_3__Cntrllostridiales;D_4__Ruminococcaceae;D_5__Butyricicoccus	0.130584	0.522581	0.14673	28.0778	0.572089	0.471872	82.4824	-0.0223678	0.0893889	0.0234594	26.2442	0.0880136	0.0630802	71.6709	1.4892	0.299796	0.0766674	25.5731	0.84163	0.131043	15.5701	inf	0	0		0.0343803	0.0203513	59.1946
D_0__Bacteria;D_1__Firmicutes;D_2__Cntrllostridia;D_3__Cntrllostridiales;D_4__Ruminococcaceae;D_5__CntrlAG-352		0	0		0	0			0	0		0	0			0	0		0	0		0.813587	0.181528	0.038309	21.1036	0.319049	0.154269	48.3528
D_0__Bacteria;D_1__Firmicutes;D_2__Cntrllostridia;D_3__Cntrllostridiales;D_4__Ruminococcaceae;D_5__Ruminococcus 1	#NAME?	0.0288795	0.0500207	173.205	0	0		0.919719	1.28307	0.195004	15.1982	2.42725	0.477536	19.6739	2.45588	0.0508829	0.0438993	86.2751	0.279168	0.420903	150.77	1.34239	0.038506	0.0226806	58.9015	0.0976401	0.03145	32.2101
D_0__Bacteria;D_1__Firmicutes;D_2__Cntrllostridia;D_3__Cntrllostridiales;D_4__Cntrllostridiaceae 1;D_5__Cntrllostridium sensu stricto 1		0	0		0	0		0.63743	0.0123769	0.0214375	173.205	0.019253	0.0333471	173.205		0	0		0	0		-0.603578	0.1609	0.0214375	13.3235	0.105891	0.0647812	61.177
D_0__Bacteria;D_1__Firmicutes;D_2__Cntrllostridia;D_3__Cntrllostridiales;D_4__Lachnospiraceae;D_5__[Eubacterium] eligens group	2.47131	0.166401	0.113428	68.1655	0.922768	1.05694	114.54	inf	0	0		0.0440068	0.0498123	113.192		0	0		0	0		0.938013	0.147148	0.0125288	8.51442	0.281919	0.104399	37.0314
D_0__Bacteria;D_1__Firmicutes;D_2__Cntrllostridia;D_3__Cntrllostridiales;D_4__Lachnospiraceae;D_5__uncultured	-1.25815	0.243413	0.160016	65.7385	0.101766	0.176263	173.205	-2.14886	0.280543	0.0448581	15.9897	0.0632598	0.0688706	108.869	-0.0144271	0.276418	0.050622	18.3136	0.273667	0.0286823	10.4807	-1.65711	0.0563837	0.0389698	69.1153	0.0178778	0.0179832	100.59
D_0__Bacteria;D_1__Firmicutes;D_2__Cntrllostridia;D_3__Cntrllostridiales;D_4__Lachnospiraceae;D_5__Tyzzerella 3		0	0		0	0			0	0		0	0		0.0939761	0.429067	0.100907	23.5179	0.457946	0.0531018	11.5956		0	0		0	0
D_0__Bacteria;D_1__Bacteroidetes;D_2__Bacteroidia;D_3__Bacteroidales;D_4__Marinifilaceae;D_5__Butyricimonas	1.05285	0.184279	0.0825586	44.801	0.382309	0.391769	102.474	0.817797	0.0811376	0.0179832	22.1639	0.143022	0.105238	73.5813	-1.72698	0.13202	0.0283174	21.4492	0.0398812	0.0247156	61.9731	0.31034	0.103141	0.0410496	39.7995	0.127895	0.0536686	41.963
D_0__Bacteria;D_1__Firmicutes;D_2__Cntrllostridia;D_3__Cntrllostridiales;D_4__Ruminococcaceae;D_5__Ruminiclostridium 6	0.960472	0.0508829	0.0363587	71.4557	0.0990153	0.1715	173.205		0	0		0	0			0	0		0	0		1.70418	0.122394	0.0203513	16.6277	0.398812	0.127739	32.03
D_0__Bacteria;D_1__Firmicutes;D_2__Cntrllostridia;D_3__Cntrllostridiales;__;__		0	0		0	0			0	0		0	0			0	0		0	0		1.38745	0.136146	0.0264885	19.4559	0.35618	0.0911695	25.5964
D_0__Bacteria;D_1__Firmicutes;D_2__Cntrllostridia;D_3__Cntrllostridiales;D_4__Ruminococcaceae;D_5__Oscillibacter		0	0		0	0		0.695145	0.0288795	0.0289449	100.227	0.0467572	0.0633793	135.55	-0.330149	0.0605094	0.0178248	29.4579	0.0481325	0.0445832	92.6261	-0.819428	0.0825128	0.0501152	60.7362	0.0467572	0.0467572	100
D_0__Bacteria;D_1__Firmicutes;D_2__Cntrllostridia;D_3__Cntrllostridiales;D_4__Ruminococcaceae;D_5__Ruminiclostridium 9		0	0		0	0		0.0264722	0.0742615	0.019642	26.4497	0.0756367	0.0899162	118.879	-2.37851	0.0715111	0.00869761	12.1626	0.0137521	0.0238194	173.205	0.197939	0.0935145	0.0252081	26.9563	0.107267	0.0378121	35.2506
D_0__Bacteria;D_1__Firmicutes;D_2__Cntrllostridia;D_3__Cntrllostridiales;D_4__Lachnospiraceae;D_5__[Eubacterium] ruminantium group		0	0		0	0			0	0		0	0			0	0		0	0		0.250962	0.137521	0.0354368	25.7682	0.16365	0.0698386	42.6755
D_0__Bacteria;D_1__Proteobacteria;D_2__Deltaproteobacteria;D_3__Desulfovibrionales;D_4__Desulfovibrionaceae;D_5__Desulfovibrio	-1.08746	0.0701359	0.0811609	115.72	0.0330051	0.0571665	173.205	0.279686	0.276418	0.0381854	13.8144	0.335552	0.220481	65.7068		0	0		0	0		0.96408	0.083888	0.0309652	36.9126	0.16365	0.135993	83.0999
D_0__Bacteria;D_1__Firmicutes;D_2__Cntrllostridia;D_3__Cntrllostridiales;D_4__Lachnospiraceae;D_5__Lachnospiraceae UCG-010	#NAME?	0.221409	0.112826	50.9582	0	0		-1.15895	0.540459	0.0958613	17.737	0.242038	0.183724	75.907		0	0		0	0		#NAME?	0.0880136	0.0318385	36.1745	0	0
D_0__Bacteria;D_1__Proteobacteria;D_2__Gammaproteobacteria;D_3__Enterobacteriales;D_4__Enterobacteriaceae;D_5__Escherichia-Shigella	0.865494	2.47951	0.632124	25.4939	4.51758	0.670533	14.8428	0.370838	0.319049	0.0833338	26.1194	0.412564	0.0930279	22.5487		0	0		0	0		-2.09954	0.0412564	0.0474	114.891	0.00962649	0.0166736	173.205
D_0__Bacteria;D_1__Firmicutes;D_2__Cntrllostridia;D_3__DTU014;D_4__uncultured bacterium;D_5__uncultured bacterium		0	0		0	0			0	0		0	0			0	0		0	0		#NAME?	0.0522581	0.0905137	173.205	0	0
D_0__Bacteria;D_1__Firmicutes;D_2__Cntrllostridia;D_3__Cntrllostridiales;D_4__Eubacteriaceae;D_5__Eubacterium		0	0		0	0			0	0		0	0			0	0		0	0		-1.14296	0.0728863	0.0406794	55.8121	0.0330051	0.0364885	110.554
D_0__Bacteria;D_1__Bacteroidetes;D_2__Bacteroidia;D_3__Bacteroidales;D_4__Prevotellaceae;D_5__Paraprevotella		0	0		0	0		0.230202	1.70114	0.347064	20.4018	1.99543	0.745242	37.3474		0	0		0	0			0	0		0	0
D_0__Bacteria;D_1__Proteobacteria;D_2__Gammaproteobacteria;D_3__Betaproteobacteriales;D_4__Burkholderiaceae;D_5__Parasutterella		0	0		0	0		1.49583	0.420815	0.0531196	12.623	1.18681	0.211457	17.8172	2.00621	0.0797624	0.0211264	26.4867	0.320425	0.0909202	28.3749	2.23704	0.00962649	0.0166736	173.205	0.045382	0.0326305	71.9019
D_0__Bacteria;D_1__Firmicutes;D_2__Negativicutes;D_3__Selenomonadales;D_4__Veillonellaceae;D_5__Dialister	3.55459	0.0440068	0.0498123	113.192	0.51708	0.533724	103.219		0	0		0	0		1.02857	0.171902	0.038383	22.3285	0.350679	0.0399286	11.3861		0	0		0	0
D_0__Bacteria;D_1__Firmicutes;D_2__Cntrllostridia;D_3__Cntrllostridiales;D_4__Ruminococcaceae;D_5__Ruminococcaceae NK4A214 group		0	0		0	0		#NAME?	0.0481325	0.00982099	20.4041	0	0		0.0412227	0.0948897	0.00714582	7.53066	0.0976401	0.0363587	37.2375	0.534336	0.0398812	0.0250198	62.7359	0.057759	0.0241349	41.7855
D_0__Bacteria;D_1__Firmicutes;D_2__Cntrllostridia;D_3__Cntrllostridiales;D_4__Family XIII;D_5__Mogibacterium		0	0		0	0			0	0		0	0			0	0		0	0		-1.20645	0.0825128	0.00550085	6.66667	0.0357555	0.0211264	59.0857
D_0__Bacteria;D_1__Proteobacteria;D_2__Alphaproteobacteria;D_3__Rhodospirillales;D_4__uncultured;D_5__gut metagenome		0	0		0	0		-3.55075	1.54711	0.13967	9.0278	0.13202	0.135638	102.74		0	0		0	0		1.78427	0.0123769	0.0214375	173.205	0.0426316	0.0273318	64.1116
D_0__Bacteria;D_1__Firmicutes;D_2__Cntrllostridia;D_3__Cntrllostridiales;D_4__Ruminococcaceae;__	inf	0	0		0.0275043	0.0476388	173.205	inf	0	0		0.00962649	0.0166736	173.205	2.14684	0.00962649	0.0166736	173.205	0.0426316	0.043029	100.932	0.343954	0.0357555	0.0619304	173.205	0.045382	0.0539497	118.879
D_0__Bacteria;D_1__Firmicutes;D_2__Cntrllostridia;D_3__Cntrllostridiales;D_4__Lachnospiraceae;D_5__GCA-900066755		0	0		0	0			0	0		0	0			0	0		0	0		#NAME?	0.064635	0.0162135	25.0847	0	0
D_0__Bacteria;D_1__Firmicutes;D_2__Cntrllostridia;D_3__Cntrllostridiales;D_4__Peptostreptococcaceae;D_5__Romboutsia		0	0		0	0			0	0		0	0			0	0		0	0		-2.15528	0.0673854	0.00714582	10.6044	0.0151273	0.0262013	173.205
D_0__Bacteria;D_1__Firmicutes;D_2__Cntrllostridia;D_3__Cntrllostridiales;D_4__Ruminococcaceae;D_5__UBA1819		0	0		0	0		2.47805	0.019253	0.019642	102.02	0.107267	0.0892512	83.205	inf	0	0		0.00962649	0.0166736	173.205	-0.684498	0.0618846	0.0142253	22.9868	0.038506	0.0260928	67.7631
D_0__Bacteria;D_1__Firmicutes;D_2__Erysipelotrichia;D_3__Erysipelotrichales;D_4__Erysipelotrichaceae;D_5__Cntrlandidatus Stoquefichus		0	0		0	0			0	0		0	0			0	0		0	0		1.14585	0.064635	0.040493	62.6486	0.143022	0.0877554	61.3579
D_0__Bacteria;D_1__Firmicutes;D_2__Cntrllostridia;D_3__Cntrllostridiales;D_4__Ruminococcaceae;D_5__Intestinimonas		0	0		0	0		inf	0	0		0.0137521	0.0238194	173.205		0	0		0	0		-0.547488	0.0522581	0.0314801	60.2396	0.0357555	0.0234997	65.7231
D_0__Bacteria;D_1__Firmicutes;D_2__Cntrllostridia;D_3__Cntrllostridiales;D_4__Ruminococcaceae;D_5__Ruminococcus 2	inf	0	0		0.0990153	0.1715	173.205	1.91768	0.830629	0.305285	36.7535	3.13824	0.572598	18.2458		0	0		0	0			0	0		0	0
D_0__Bacteria;D_1__Firmicutes;D_2__Cntrllostridia;D_3__Cntrllostridiales;D_4__Lachnospiraceae;D_5__[Ruminococcus] gnavus group	2.22717	1.86479	0.538016	28.8513	8.73123	3.4543	39.5626	0.866733	0.140272	0.0469188	33.4485	0.25579	0.173843	67.9635	#NAME?	0.00962649	0.0166736	173.205	0	0		#NAME?	0.00962649	0.0166736	173.205	0	0
D_0__Bacteria;D_1__Proteobacteria;D_2__Gammaproteobacteria;D_3__Pasteurellales;D_4__Pasteurellaceae;D_5__Actinobacillus		0	0		0	0			0	0		0	0		0.0972972	0.118268	0.0662961	56.0557	0.12652	0.0635581	50.2357		0	0		0	0
D_0__Bacteria;D_1__Bacteroidetes;D_2__Bacteroidia;D_3__Flavobacteriales;D_4__Flavobacteriaceae;D_5__uncultured		0	0		0	0			0	0		0	0			0	0		0	0		1.72698	0.0398812	0.00714582	17.9178	0.13202	0.0642682	48.6805
D_0__Bacteria;D_1__Cntrlyanobacteria;D_2__Melainabacteria;D_3__Gastranaerophilales;D_4__gut metagenome;D_5__gut metagenome		0	0		0	0			0	0		0	0			0	0		0	0		#NAME?	0.0605094	0.0216569	35.7909	0	0
D_0__Bacteria;D_1__Actinobacteria;D_2__Cntrloriobacteriia;D_3__Cntrloriobacteriales;D_4__Cntrloriobacteriales Incertae Sedis;D_5__uncultured		0	0		0	0			0	0		0	0		0.946758	0.0948897	0.0125288	13.2035	0.182903	0.0675256	36.9187		0	0		0	0
D_0__Bacteria;D_1__Firmicutes;D_2__Erysipelotrichia;D_3__Erysipelotrichales;D_4__Erysipelotrichaceae;D_5__[Clostridium] innocuum group		0	0		0	0		inf	0	0		0.019253	0.0333471	173.205		0	0		0	0		0.311944	0.0398812	0.0231347	58.009	0.0495077	0.0369008	74.5356
D_0__Bacteria;D_1__Actinobacteria;D_2__Actinobacteria;D_3__Bifidobacteriales;D_4__Bifidobacteriaceae;D_5__Bifidobacterium		0	0		0	0		-0.843094	0.323175	0.0237797	7.35813	0.180153	0.12179	67.6036	-2.70044	0.0536333	0.0125288	23.3601	0.00825128	0.0142916	173.205		0	0		0	0
D_0__Bacteria;D_1__Firmicutes;D_2__Cntrllostridia;D_3__Cntrllostridiales;D_4__Lachnospiraceae;D_5__Lachnospiraceae UCG-008	#NAME?	0.105891	0.0663959	62.7019	0	0		#NAME?	0.0508829	0.0333188	65.4813	0	0		#NAME?	0.0893889	0.0125288	14.0161	0	0			0	0		0	0
D_0__Bacteria;D_1__Firmicutes;D_2__Bacilli;D_3__Lactobacillales;D_4__Enterococcaceae;D_5__Enterococcus		0	0		0	0			0	0		0	0			0	0		0	0		-1.19265	0.0440068	0.0258013	58.6302	0.019253	0.019253	100
D_0__Bacteria;D_1__Proteobacteria;D_2__Gammaproteobacteria;D_3__Pasteurellales;D_4__Pasteurellaceae;__		0	0		0	0			0	0		0	0		1.75132	0.0412564	0.0247538	60	0.138897	0.0977369	70.3667		0	0		0	0
D_0__Bacteria;D_1__Bacteroidetes;D_2__Bacteroidia;D_3__Cntrlhitinophagales;D_4__Cntrlhitinophagaceae;D_5__Sediminibacterium		0	0		0	0			0	0		0	0		2.63227	0.0206282	0.0207197	100.443	0.127895	0.0256174	20.03	inf	0	0		0.374058	0.15776	42.1754
D_0__Bacteria;D_1__Firmicutes;D_2__Cntrllostridia;D_3__Cntrllostridiales;D_4__Lachnospiraceae;D_5__Lachnospiraceae UCG-004	-3.49691	0.589966	0.199415	33.8011	0.0522581	0.0905137	173.205	-1.70328	0.174652	0.0192038	10.9955	0.0536333	0.0592939	110.554	#NAME?	0.0330051	0.0202114	61.2372	0	0			0	0		0	0
D_0__Bacteria;D_1__Firmicutes;D_2__Cntrllostridia;D_3__Cntrllostridiales;D_4__Lachnospiraceae;D_5__Lactonifactor		0	0		0	0			0	0		0	0			0	0		0	0		#NAME?	0.00962649	0.0166736	173.205	0	0
D_0__Bacteria;D_1__Firmicutes;D_2__Erysipelotrichia;D_3__Erysipelotrichales;D_4__Erysipelotrichaceae;D_5__Turicibacter		0	0		0	0			0	0		0	0			0	0		0	0		2.05889	0.00825128	0.0142916	173.205	0.0343803	0.0595485	173.205
D_0__Bacteria;D_1__Firmicutes;D_2__Cntrllostridia;D_3__Cntrllostridiales;D_4__Lachnospiraceae;D_5__Sellimonas		0	0		0	0			0	0		0	0		-1.58496	0.0618846	0.0125288	20.2454	0.0206282	0.0214375	103.923		0	0		0	0
D_0__Bacteria;D_1__Firmicutes;D_2__Bacilli;D_3__Lactobacillales;D_4__Cntrlarnobacteriaceae;D_5__Granulicatella		0	0		0	0			0	0		0	0			0	0		0	0		#NAME?	0.00825128	0.0142916	173.205	0	0
D_0__Bacteria;D_1__Firmicutes;D_2__Bacilli;D_3__Bacillales;D_4__Staphylococcaceae;D_5__Staphylococcus	5.8944	0.0398812	0.0494121	123.898	2.37224	1.6205	68.3111	inf	0	0		0.0948897	0.106621	112.363		0	0		0	0		inf	0	0		0.720612	1.22601	170.134
D_0__Bacteria;D_1__Firmicutes;D_2__Cntrllostridia;D_3__Cntrllostridiales;D_4__Peptostreptococcaceae;D_5__Intestinibacter		0	0		0	0			0	0		0	0			0	0		0	0		#NAME?	0.0233786	0.0253204	108.306	0	0
D_0__Bacteria;D_1__Actinobacteria;D_2__Cntrloriobacteriia;D_3__Cntrloriobacteriales;D_4__Eggerthellaceae;D_5__Adlercreutzia		0	0		0	0		#NAME?	0.0275043	0.0277779	100.995	0	0		-2.09954	0.0412564	0.0113403	27.4874	0.00962649	0.0166736	173.205		0	0		0	0
D_0__Bacteria;D_1__Firmicutes;D_2__Cntrllostridia;D_3__Cntrllostridiales;D_4__Ruminococcaceae;D_5__Oscillospira		0	0		0	0		#NAME?	0.00962649	0.0166736	173.205	0	0		#NAME?	0.0550085	0.0345723	62.849	0	0			0	0		0	0
D_0__Bacteria;D_1__Firmicutes;D_2__Cntrllostridia;D_3__Cntrllostridiales;D_4__Lachnospiraceae;D_5__Lachnospiraceae UCG-001		0	0		0	0			0	0		0	0		0.443607	0.0343803	0.022132	64.3739	0.0467572	0.00615014	13.1533		0	0		0	0
D_0__Bacteria;D_1__Firmicutes;D_2__Cntrllostridia;D_3__Cntrllostridiales;D_4__Family XIII;D_5__Family XIII UCG-001		0	0		0	0		0.893085	0.019253	0.019642	102.02	0.0357555	0.0619304	173.205		0	0		0	0		1.22239	0.0123769	0.0214375	173.205	0.0288795	0.0337698	116.934
D_0__Bacteria;D_1__Proteobacteria;D_2__Gammaproteobacteria;D_3__Betaproteobacteriales;D_4__Neisseriaceae;D_5__Neisseria		0	0		0	0			0	0		0	0		1	0.0165026	0.0165026	100	0.0330051	0.0404228	122.474	inf	0	0		0.166401	0.193211	116.112
D_0__Bacteria;D_1__Firmicutes;D_2__Cntrllostridia;D_3__Cntrllostridiales;D_4__Lachnospiraceae;D_5__[Eubacterium] ventriosum group		0	0		0	0		-0.812373	0.0990153	0.0350072	35.3553	0.0563837	0.0564173	100.059		0	0		0	0		inf	0	0		0.0522581	0.0113403	21.7006
D_0__Bacteria;D_1__Proteobacteria;D_2__Alphaproteobacteria;D_3__Cntrlaulobacterales;D_4__Cntrlaulobacteraceae;D_5__Brevundimonas		0	0		0	0		inf	0	0		2.19209	3.79681	173.205		0	0		0	0		inf	0	0		0.0220034	0.038111	173.205
D_0__Bacteria;D_1__Firmicutes;D_2__Cntrllostridia;D_3__Cntrllostridiales;D_4__Lachnospiraceae;D_5__Cntrloprococcus 2		0	0		0	0		-0.662965	0.130645	0.029463	22.5519	0.0825128	0.0881854	106.875		0	0		0	0			0	0		0	0
D_0__Bacteria;D_1__Firmicutes;D_2__Cntrllostridia;D_3__Cntrllostridiales;D_4__Family XIII;D_5__Family XIII AD3011 group	1.83007	0.0123769	0.0214375	173.205	0.0440068	0.076222	173.205	#NAME?	0.0508829	0.0367725	72.2689	0	0		#NAME?	0.00825128	0.0142916	173.205	0	0		inf	0	0		0.0165026	0.0285833	173.205
D_0__Bacteria;D_1__Firmicutes;D_2__Cntrllostridia;D_3__Cntrllostridiales;D_4__Peptococcaceae;D_5__uncultured	#NAME?	0.00962649	0.0166736	173.205	0	0		inf	0	0		0.0233786	0.040493	173.205		0	0		0	0		#NAME?	0.00825128	0.0142916	173.205	0	0
D_0__Bacteria;D_1__Firmicutes;D_2__Cntrllostridia;D_3__Cntrllostridiales;D_4__Ruminococcaceae;D_5__Flavonifractor		0	0		0	0		inf	0	0		0.00962649	0.0166736	173.205	0.523562	0.0220034	0.0233381	106.066	0.0316299	0.0192038	60.7141		0	0		0	0
D_0__Bacteria;D_1__Proteobacteria;D_2__Gammaproteobacteria;D_3__Betaproteobacteriales;D_4__Burkholderiaceae;D_5__Oxalobacter		0	0		0	0			0	0		0	0			0	0		0	0		#NAME?	0.00825128	0.0142916	173.205	0	0
D_0__Bacteria;D_1__Firmicutes;D_2__Erysipelotrichia;D_3__Erysipelotrichales;D_4__Erysipelotrichaceae;D_5__Erysipelatoclostridium	2.03403	0.273667	0.116909	42.7195	1.1208	0.717069	63.9784		0	0		0	0			0	0		0	0			0	0		0	0
D_0__Bacteria;D_1__Firmicutes;D_2__Cntrllostridia;D_3__Cntrllostridiales;D_4__Ruminococcaceae;D_5__Ruminococcaceae UCG-010		0	0		0	0		1.34104	0.0825128	0.0169548	20.548	0.209032	0.0336857	16.1151		0	0		0	0			0	0		0	0
D_0__Bacteria;D_1__Firmicutes;D_2__Cntrllostridia;D_3__Cntrllostridiales;D_4__Lachnospiraceae;D_5__[Eubacterium] xylanophilum group		0	0		0	0		#NAME?	0.0591342	0.0162135	27.4182	0	0		-0.415037	0.0110017	0.0190555	173.205	0.00825128	0.0142916	173.205		0	0		0	0
D_0__Bacteria;D_1__Proteobacteria;D_2__Alphaproteobacteria;D_3__Rhodospirillales;D_4__uncultured;D_5__uncultured organism	1.12445	0.152649	0.108101	70.8168	0.332802	0.447729	134.533		0	0		0	0			0	0		0	0			0	0		0	0
D_0__Bacteria;D_1__Bacteroidetes;D_2__Bacteroidia;D_3__Cntrlhitinophagales;D_4__Cntrlhitinophagaceae;D_5__Vibrionimonas		0	0		0	0			0	0		0	0		inf	0	0		0.0110017	0.0190555	173.205	inf	0	0		0.0770119	0.037912	49.2287
D_0__Bacteria;__;__;__;__;__	#NAME?	0.242038	0.255775	105.676	0	0		inf	0	0		0.0330051	0.0571665	173.205	#NAME?	0.0151273	0.0262013	173.205	0	0			0	0		0	0
D_0__Bacteria;D_1__Firmicutes;D_2__Erysipelotrichia;D_3__Erysipelotrichales;D_4__Erysipelotrichaceae;D_5__Holdemania		0	0		0	0		inf	0	0		0.12927	0.0649124	50.2146	inf	0	0		0.00962649	0.0166736	173.205	inf	0	0		0.0206282	0.0357291	173.205
D_0__Bacteria;D_1__Bacteroidetes;D_2__Bacteroidia;D_3__Bacteroidales;D_4__Prevotellaceae;D_5__Prevotellaceae UCG-001		0	0		0	0			0	0		0	0			0	0		0	0		#NAME?	0.00962649	0.0166736	173.205	0	0
D_0__Bacteria;D_1__Firmicutes;D_2__Bacilli;D_3__Lactobacillales;D_4__Streptococcaceae;D_5__Lactococcus		0	0		0	0			0	0		0	0			0	0		0	0		#NAME?	0.00825128	0.0142916	173.205	0	0
D_0__Bacteria;D_1__Firmicutes;D_2__Cntrllostridia;D_3__Cntrllostridiales;D_4__Peptococcaceae;D_5__Peptococcus		0	0		0	0		#NAME?	0.057759	0.00912213	15.7935	0	0			0	0		0	0			0	0		0	0
Unassigned;__;__;__;__;__	#NAME?	0.207657	0.043029	20.7212	0	0			0	0		0	0			0	0		0	0			0	0		0	0
D_0__Bacteria;D_1__Firmicutes;D_2__Erysipelotrichia;D_3__Erysipelotrichales;D_4__Erysipelotrichaceae;D_5__uncultured		0	0		0	0		-0.131245	0.0316299	0.0214375	67.7759	0.0288795	0.0500207	173.205		0	0		0	0			0	0		0	0
D_0__Bacteria;D_1__Firmicutes;D_2__Cntrllostridia;D_3__Cntrllostridiales;D_4__Lachnospiraceae;D_5__Hungatella		0	0		0	0		2.16993	0.0137521	0.0238194	173.205	0.0618846	0.0787002	127.172	inf	0	0		0.00962649	0.0166736	173.205		0	0		0	0
D_0__Bacteria;D_1__Firmicutes;D_2__Cntrllostridia;D_3__Cntrllostridiales;D_4__Lachnospiraceae;D_5__Moryella		0	0		0	0		-1.58496	0.0371308	0.0217875	58.6777	0.0123769	0.0214375	173.205		0	0		0	0			0	0		0	0
D_0__Bacteria;D_1__Proteobacteria;D_2__Gammaproteobacteria;D_3__Pseudomonadales;D_4__Moraxellaceae;D_5__Acinetobacter	5.50901	0.0178778	0.0309652	173.205	0.814126	0.821379	100.891		0	0		0	0		inf	0	0		0.00962649	0.0166736	173.205	inf	0	0		0.0123769	0.0214375	173.205
D_0__Bacteria;D_1__Firmicutes;D_2__Cntrllostridia;D_3__Cntrllostridiales;D_4__Ruminococcaceae;D_5__GCA-900066225		0	0		0	0		1.51457	0.00962649	0.0166736	173.205	0.0275043	0.0476388	173.205	inf	0	0		0.00962649	0.0166736	173.205		0	0		0	0
D_0__Bacteria;D_1__Firmicutes;D_2__Cntrllostridia;D_3__Cntrllostridiales;D_4__Lachnospiraceae;D_5__Eisenbergiella		0	0		0	0		1.22239	0.0165026	0.0165026	100	0.038506	0.0415305	107.855		0	0		0	0		inf	0	0		0.0123769	0.0214375	173.205
D_0__Archaea;D_1__Euryarchaeota;D_2__Methanobacteria;D_3__Methanobacteriales;D_4__Methanobacteriaceae;D_5__Methanobrevibacter	3.27302	0.0288795	0.0500207	173.205	0.279168	0.391322	140.174		0	0		0	0			0	0		0	0			0	0		0	0
D_0__Bacteria;D_1__Proteobacteria;D_2__Alphaproteobacteria;D_3__Rhizobiales;D_4__Beijerinckiaceae;D_5__Bosea		0	0		0	0			0	0		0	0		inf	0	0		0.0137521	0.0238194	173.205	inf	0	0		0.0123769	0.0214375	173.205
D_0__Bacteria;D_1__Firmicutes;D_2__Erysipelotrichia;D_3__Erysipelotrichales;D_4__Erysipelotrichaceae;D_5__Dielma		0	0		0	0		inf	0	0		0.0123769	0.0214375	173.205		0	0		0	0		inf	0	0		0.0261291	0.0278799	106.701
D_0__Bacteria;D_1__Firmicutes;D_2__Cntrllostridia;D_3__Cntrllostridiales;D_4__Ruminococcaceae;D_5__Fournierella		0	0		0	0		1.87447	0.00825128	0.0142916	173.205	0.0302547	0.0524027	173.205		0	0		0	0			0	0		0	0
D_0__Bacteria;D_1__Firmicutes;D_2__Bacilli;D_3__Bacillales;D_4__Planococcaceae;D_5__Domibacillus		0	0		0	0		inf	0	0		0.254414	0.440659	173.205		0	0		0	0			0	0		0	0
D_0__Bacteria;D_1__Actinobacteria;D_2__Actinobacteria;D_3__Cntrlorynebacteriales;D_4__Cntrlorynebacteriaceae;D_5__Lawsonella	inf	0	0		0.554211	0.959921	173.205	inf	0	0		0.0398812	0.0690762	173.205		0	0		0	0		inf	0	0		0.0220034	0.038111	173.205
D_0__Bacteria;D_1__Proteobacteria;D_2__Gammaproteobacteria;D_3__Betaproteobacteriales;D_4__Burkholderiaceae;__		0	0		0	0		inf	0	0		0.0330051	0.0571665	173.205		0	0		0	0		inf	0	0		0.019253	0.019642	102.02
D_0__Bacteria;D_1__Spirochaetes;D_2__Spirochaetia;D_3__Spirochaetales;D_4__Spirochaetaceae;D_5__Treponema 2	#NAME?	0.0178778	0.0309652	173.205	0	0			0	0		0	0			0	0		0	0			0	0		0	0
D_0__Bacteria;D_1__Proteobacteria;D_2__Gammaproteobacteria;D_3__Pseudomonadales;D_4__Moraxellaceae;D_5__Enhydrobacter	inf	0	0		0.576214	0.998032	173.205		0	0		0	0			0	0		0	0		inf	0	0		0.0151273	0.0262013	173.205
D_0__Bacteria;D_1__Firmicutes;D_2__Cntrllostridia;D_3__Cntrllostridiales;D_4__Lachnospiraceae;D_5__Shuttleworthia	1.70044	0.0110017	0.0190555	173.205	0.0357555	0.0619304	173.205		0	0		0	0			0	0		0	0			0	0		0	0
D_0__Bacteria;D_1__Firmicutes;D_2__Cntrllostridia;D_3__Cntrllostridiales;D_4__Cntrlhristensenellaceae;D_5__Cntrlatabacter		0	0		0	0			0	0		0	0			0	0		0	0		inf	0	0		0.0137521	0.0238194	173.205
D_0__Bacteria;D_1__Firmicutes;D_2__Cntrllostridia;D_3__Cntrllostridiales;D_4__Cntrllostridiales vadinBB60 group;D_5__uncultured bacterium	#NAME?	0.0137521	0.0238194	173.205	0	0			0	0		0	0			0	0		0	0			0	0		0	0
D_0__Bacteria;D_1__Firmicutes;D_2__Cntrllostridia;D_3__Cntrllostridiales;D_4__Cntrlhristensenellaceae;D_5__uncultured	inf	0	0		0.0495077	0.0857498	173.205		0	0		0	0			0	0		0	0		inf	0	0		0.0206282	0.0357291	173.205
D_0__Bacteria;D_1__Bacteroidetes;D_2__Bacteroidia;D_3__Sphingobacteriales;D_4__Sphingobacteriaceae;D_5__Pedobacter		0	0		0	0			0	0		0	0			0	0		0	0		inf	0	0		0.019253	0.019642	102.02
D_0__Bacteria;D_1__Firmicutes;D_2__Bacilli;D_3__Bacillales;D_4__Family XI;D_5__Gemella		0	0		0	0			0	0		0	0			0	0		0	0		inf	0	0		0.0110017	0.0190555	173.205
D_0__Bacteria;D_1__Firmicutes;D_2__Cntrllostridia;D_3__Cntrllostridiales;D_4__Family XIII;D_5__[Eubacterium] nodatum group		0	0		0	0			0	0		0	0			0	0		0	0		inf	0	0		0.0110017	0.0190555	173.205
D_0__Bacteria;D_1__Firmicutes;D_2__Cntrllostridia;D_3__Cntrllostridiales;D_4__Family XI;D_5__Anaerococcus	inf	0	0		0.585841	1.01471	173.205		0	0		0	0			0	0		0	0			0	0		0	0
D_0__Bacteria;D_1__Firmicutes;D_2__Cntrllostridia;D_3__Cntrllostridiales;D_4__Family XI;D_5__Finegoldia	#NAME?	0.0247538	0.0428749	173.205	0	0		inf	0	0		0.0866384	0.150062	173.205		0	0		0	0			0	0		0	0
D_0__Bacteria;D_1__Proteobacteria;D_2__Gammaproteobacteria;D_3__Betaproteobacteriales;D_4__Burkholderiaceae;D_5__Cntrlomamonas	inf	0	0		0.262666	0.45495	173.205	inf	0	0		0.0398812	0.0690762	173.205		0	0		0	0			0	0		0	0
D_0__Bacteria;D_1__Proteobacteria;D_2__Alphaproteobacteria;D_3__Rhizobiales;D_4__Beijerinckiaceae;D_5__Methylobacterium		0	0		0	0		inf	0	0		0.0715111	0.071933	100.59		0	0		0	0			0	0		0	0
D_0__Bacteria;D_1__Tenericutes;D_2__Mollicutes;D_3__Izimaplasmatales;D_4__uncultured organism;D_5__uncultured organism		0	0		0	0		1.9386	0.00825128	0.0142916	173.205	0.0316299	0.0547846	173.205		0	0		0	0			0	0		0	0
D_0__Bacteria;D_1__Proteobacteria;D_2__Gammaproteobacteria;D_3__Gammaproteobacteria Incertae Sedis;D_4__Unknown Family;D_5__Acidibacter		0	0		0	0			0	0		0	0			0	0		0	0		inf	0	0		0.0247538	0.0428749	173.205
D_0__Bacteria;D_1__Firmicutes;D_2__Bacilli;D_3__Bacillales;D_4__Listeriaceae;D_5__Brochothrix		0	0		0	0		inf	0	0		0.0220034	0.038111	173.205		0	0		0	0			0	0		0	0
D_0__Bacteria;D_1__Firmicutes;D_2__Cntrllostridia;D_3__Cntrllostridiales;D_4__Defluviitaleaceae;D_5__Defluviitaleaceae UCG-011		0	0		0	0		inf	0	0		0.0522581	0.0905137	173.205		0	0		0	0			0	0		0	0
D_0__Bacteria;D_1__Proteobacteria;D_2__Gammaproteobacteria;D_3__Pseudomonadales;D_4__Moraxellaceae;D_5__Psychrobacter		0	0		0	0		inf	0	0		0.0178778	0.0309652	173.205		0	0		0	0			0	0		0	0
D_0__Bacteria;D_1__Firmicutes;D_2__Cntrllostridia;D_3__Cntrllostridiales;D_4__Cntrllostridiales vadinBB60 group;D_5__uncultured organism		0	0		0	0		inf	0	0		0.0178778	0.0309652	173.205		0	0		0	0			0	0		0	0
D_0__Bacteria;D_1__Firmicutes;D_2__Bacilli;D_3__Bacillales;D_4__Bacillaceae;D_5__Anoxybacillus		0	0		0	0		inf	0	0		0.0426316	0.0738401	173.205		0	0		0	0			0	0		0	0
D_0__Bacteria;D_1__Proteobacteria;D_2__Gammaproteobacteria;D_3__Vibrionales;D_4__Vibrionaceae;D_5__Vibrio		0	0		0	0			0	0		0	0			0	0		0	0		inf	0	0		0.0165026	0.0285833	173.205
D_0__Bacteria;D_1__Entotheonellaeota;D_2__Entotheonellia;D_3__Entotheonellales;D_4__Entotheonellaceae;D_5__uncultured bacterium	#NAME?	0.0178778	0.0309652	173.205	0	0			0	0		0	0			0	0		0	0			0	0		0	0
D_0__Bacteria;D_1__Firmicutes;D_2__Cntrllostridia;D_3__Cntrllostridiales;D_4__Cntrllostridiales vadinBB60 group;D_5__gut metagenome		0	0		0	0		#NAME?	0.00962649	0.0166736	173.205	0	0			0	0		0	0			0	0		0	0
D_0__Bacteria;D_1__Firmicutes;D_2__Cntrllostridia;D_3__Cntrllostridiales;D_4__Ruminococcaceae;D_5__Cntrlandidatus Soleaferrea		0	0		0	0			0	0		0	0			0	0		0	0		inf	0	0		0.0137521	0.0238194	173.205
D_0__Bacteria;D_1__Firmicutes;D_2__Cntrllostridia;D_3__Cntrllostridiales;D_4__Ruminococcaceae;D_5__Ruminiclostridium		0	0		0	0		inf	0	0		0.0123769	0.0214375	173.205		0	0		0	0			0	0		0	0
D_0__Bacteria;D_1__Firmicutes;D_2__Bacilli;D_3__Lactobacillales;D_4__Cntrlarnobacteriaceae;D_5__Alloiococcus		0	0		0	0		inf	0	0		0.0123769	0.0214375	173.205		0	0		0	0			0	0		0	0
D_0__Bacteria;D_1__Firmicutes;D_2__Cntrllostridia;D_3__Cntrllostridiales;D_4__Ruminococcaceae;D_5__Angelakisella		0	0		0	0		inf	0	0		0.0123769	0.0214375	173.205		0	0		0	0			0	0		0	0
D_0__Bacteria;D_1__Firmicutes;D_2__Erysipelotrichia;D_3__Erysipelotrichales;D_4__Erysipelotrichaceae;D_5__Faecalitalea	inf	0	0		0.0398812	0.0690762	173.205		0	0		0	0			0	0		0	0			0	0		0	0
D_0__Bacteria;D_1__Bacteroidetes;D_2__Bacteroidia;D_3__Cntrlhitinophagales;D_4__Cntrlhitinophagaceae;D_5__Cntrlhitinophaga		0	0		0	0			0	0		0	0			0	0		0	0		inf	0	0		0.0123769	0.0214375	173.205
D_0__Bacteria;D_1__Proteobacteria;D_2__Gammaproteobacteria;D_3__Oceanospirillales;D_4__Halomonadaceae;D_5__Halomonas		0	0		0	0			0	0		0	0			0	0		0	0		inf	0	0		0.0123769	0.0214375	173.205
D_0__Bacteria;D_1__Actinobacteria;D_2__Cntrloriobacteriia;D_3__Cntrloriobacteriales;D_4__Eggerthellaceae;D_5__Eggerthella	#NAME?	0.0137521	0.0238194	173.205	0	0			0	0		0	0			0	0		0	0			0	0		0	0
D_0__Bacteria;D_1__Actinobacteria;D_2__Actinobacteria;D_3__Cntrlorynebacteriales;D_4__Cntrlorynebacteriaceae;D_5__Turicella	#NAME?	0.0123769	0.0214375	173.205	0	0			0	0		0	0			0	0		0	0			0	0		0	0
D_0__Bacteria;D_1__Fusobacteria;D_2__Fusobacteriia;D_3__Fusobacteriales;D_4__Leptotrichiaceae;D_5__Leptotrichia		0	0		0	0			0	0		0	0			0	0		0	0		inf	0	0		0.0110017	0.0190555	173.205
D_0__Bacteria;D_1__Proteobacteria;D_2__Alphaproteobacteria;D_3__Cntrlaulobacterales;D_4__Cntrlaulobacteraceae;D_5__uncultured		0	0		0	0			0	0		0	0			0	0		0	0		inf	0	0		0.0110017	0.0190555	173.205
D_0__Bacteria;D_1__Proteobacteria;D_2__Deltaproteobacteria;D_3__Myxococcales;D_4__Polyangiaceae;D_5__Pajaroellobacter		0	0		0	0			0	0		0	0			0	0		0	0		inf	0	0		0.0110017	0.0190555	173.205
D_0__Bacteria;D_1__Acidobacteria;D_2__Subgroup 6;D_3__Unknown Order;D_4__Unknown Family;D_5__Luteitalea	inf	0	0		0.196655	0.340617	173.205		0	0		0	0			0	0		0	0			0	0		0	0
D_0__Bacteria;D_1__Firmicutes;D_2__Cntrllostridia;D_3__Cntrllostridiales;D_4__Lachnospiraceae;D_5__Lachnospiraceae NK4B4 group		0	0		0	0		#NAME?	0.0123769	0.0214375	173.205	0	0			0	0		0	0			0	0		0	0
D_0__Bacteria;D_1__Bacteroidetes;D_2__Bacteroidia;D_3__Flavobacteriales;D_4__Flavobacteriaceae;D_5__Cntrlapnocytophaga	#NAME?	0.0440068	0.076222	173.205	0	0			0	0		0	0			0	0		0	0			0	0		0	0
D_0__Bacteria;D_1__Synergistetes;D_2__Synergistia;D_3__Synergistales;D_4__Synergistaceae;D_5__Cntrlloacibacillus	#NAME?	0.0426316	0.0738401	173.205	0	0			0	0		0	0			0	0		0	0			0	0		0	0
D_0__Bacteria;D_1__Proteobacteria;D_2__Gammaproteobacteria;D_3__Betaproteobacteriales;D_4__Neisseriaceae;D_5__Kingella		0	0		0	0			0	0		0	0			0	0		0	0		inf	0	0		0.00962649	0.0166736	173.205
D_0__Bacteria;D_1__Actinobacteria;D_2__Actinobacteria;D_3__Cntrlorynebacteriales;D_4__Nocardiaceae;D_5__Gordonia	inf	0	0		0.166401	0.288215	173.205		0	0		0	0			0	0		0	0			0	0		0	0
D_0__Bacteria;D_1__Firmicutes;D_2__Bacilli;D_3__Lactobacillales;D_4__Aerococcaceae;D_5__Aerosphaera	#NAME?	0.0247538	0.0428749	173.205	0	0			0	0		0	0			0	0		0	0			0	0		0	0

## Sheet: Table_S7
clade_name	CT7_TI_1	CT7_TI_2	CT7_TI_3	CT7_AC_1	CT7_AC_2	CT7_AC_3	CT7_DC_1	CT7_DC_2	CT7_DC_3	CT7_R_1	CT7_R_2	CT7_R_3	CT8_TI_1	CT8_TI_2	CT8_TI_3	CT8_AC_1	CT8_AC_2	CT8_AC_3	CT8_DC_1	CT8_DC_2	CT8_DC_3	CT8_R_1	CT8_R_2	CT8_R_3	CT12_TI_1	CT12_TI_2	CT12_TI_3	CT12_AC_1	CT12_AC_2	CT12_AC_3	CT12_DC_1	CT12_DC_2	CT12_DC_3	CT12_R_1	CT12_R_2	CT12_R_3	CT13_TI_1	CT13_TI_2	CT13_TI_3	CT13_AC_1	CT13_AC_2	CT13_AC_3	CT13_DC_1	CT13_DC_2	CT13_DC_3	CT13_R_1	CT13_R_2	CT13_R_3	CT14_TI_1
k__Archaea|p__Euryarchaeota|c__Methanobacteria|o__Methanobacteriales|f__Methanobacteriaceae|g__Methanobrevibacter|s__Methanobrevibacter_smithii	0	0	0	0	0	0	0	0	0	0	0	0	0	0	0	0	0	0	0	0	0	0	0	0	0.08725	0.03843	0.11668	0	0	0	0.12013	0.16547	0.18267	0.30092	0.27589	0.11708	0	0	0	0	0	0	0	0	0	0	0	0	0
k__Bacteria|p__Actinobacteria|c__Actinobacteria|o__Actinomycetales|f__Actinomycetaceae|g__Actinomyces|s__Actinomyces_odontolyticus	0	0	0	0	0	0	0	0	0	0	0	0	0	0	0	0.22959	0	0	0	0	0	0	0	0	0	0	0	0	0	0	0	0	0	0	0	0	0	0	0	0	0	0	0	0	0	0	0	0	0
k__Bacteria|p__Actinobacteria|c__Actinobacteria|o__Actinomycetales|f__Actinomycetaceae|g__Actinomyces|s__Actinomyces_oris	0	0	0	0	0	0	0	0	0	0	0	0	0	0	0	0	0	0	0	0	0	0	0	0	0	0.00302	0	0	0	0	0	0	0	0	0	0	0	0	0	0	0	0	0	0	0	0	0	0	0
k__Bacteria|p__Actinobacteria|c__Actinobacteria|o__Actinomycetales|f__Actinomycetaceae|g__Actinomyces|s__Actinomyces_sp_HMSC035G02	0	0	0	0	0	0	0	0	0	0	0	0	0	0	0	0.299	0	0	0	0	0	0	0	0	0	0	0	0	0	0	0	0	0	0	0	0	0	0	0	0	0	0	0	0	0	0	0	0	0
k__Bacteria|p__Actinobacteria|c__Actinobacteria|o__Actinomycetales|f__Actinomycetaceae|g__Actinomyces|s__Actinomyces_sp_ICM47	0	0	0	0	0	0	0	0	0	0	0	0	0	0	0	0.06071	0	0	0	0	0	0	0	0	0	0	0	0	0	0	0	0	0	0	0	0	0	0	0	0	0	0	0	0	0	0	0	0	0
k__Bacteria|p__Actinobacteria|c__Actinobacteria|o__Bifidobacteriales|f__Bifidobacteriaceae|g__Bifidobacterium|s__Bifidobacterium_adolescentis	0	0	0	0.1299	0	0	0	0	0	0	0	0	0	0	0	0	0	0	0	0	0	0	0	0	0	0	0	0	0	0	0	0	0	0	0	0	2.3511	1.6212	3.61966	0	0	3.55084	2.59887	3.85272	0	0	0	0	0.7318
k__Bacteria|p__Actinobacteria|c__Actinobacteria|o__Bifidobacteriales|f__Bifidobacteriaceae|g__Bifidobacterium|s__Bifidobacterium_angulatum	0	0	0	0	0	0	0	0	0	0	0	0	0	0	0	0	0	0	0	0	0	0	0	0	0.11051	0.16086	0.14777	0	0	0.00565	0.15319	0.22187	0.17359	0.35457	0.20578	0.22812	0	0	0	0	0	0	0	0	0	0	0	0	0
k__Bacteria|p__Actinobacteria|c__Actinobacteria|o__Bifidobacteriales|f__Bifidobacteriaceae|g__Bifidobacterium|s__Bifidobacterium_bifidum	0	0	0	0	0	0	0	0	0	0	0	0	0	0	0	0	0	0	0	0	0	0	0	0	1.09527	0.76943	1.17143	1.53168	2.50193	2.79744	1.00012	1.10442	0.85828	1.60949	1.25963	1.02335	0	0	0	0	0	0	0	0	0	0	0	0	0
k__Bacteria|p__Actinobacteria|c__Actinobacteria|o__Bifidobacteriales|f__Bifidobacteriaceae|g__Bifidobacterium|s__Bifidobacterium_catenulatum	0	0	0	0	0	0	0	0	0	0	0	0	0	0	0	0	0	0	0	0	0	0	0	0	0	0	0	0	0	0	0	0	0	0	0	0	0	0	0.57209	0	0	0.47485	0.79112	0.60042	0	0	0	0	0
k__Bacteria|p__Actinobacteria|c__Actinobacteria|o__Bifidobacteriales|f__Bifidobacteriaceae|g__Bifidobacterium|s__Bifidobacterium_longum	0	0	0	0	0	0	0	0	0	0	0	0	0	0	0	0	0.03897	0	0	0	0	0	0	0	0.24163	0.32778	0.0946	0	0	0	0.12348	0.08696	0.06097	0.17579	0.1265	0.17466	1.82979	1.48583	2.48544	0	0	1.71652	2.11504	1.53498	0	0	0	0	0
k__Bacteria|p__Actinobacteria|c__Actinobacteria|o__Bifidobacteriales|f__Bifidobacteriaceae|g__Bifidobacterium|s__Bifidobacterium_pseudocatenulatum	0	0	0	0	0	0	0	0	0	0	0	0	0	0	0	0	0	0	0	0	0	0	0	0	0	0	0	0	0	0	0	0	0	0	0	0	0.01968	0	0	0	0	0	0	0	0	0	0	0	0
k__Bacteria|p__Actinobacteria|c__Actinobacteria|o__Micrococcales|f__Dermacoccaceae|g__Dermacoccus|s__Dermacoccus_nishinomiyaensis	0	0	0	0	0	0	0	0	0	0	0	0	0	0	0	0	0	0	0	0	0	0	0	0	0	0	0	0	0	0	0	0	0	0	0	0.01557	0	0	0	0	0	0	0	0	0	0	0	0	0
k__Bacteria|p__Actinobacteria|c__Actinobacteria|o__Micrococcales|f__Micrococcaceae|g__Micrococcus|s__Micrococcus_luteus	0	0	0	0	0	0	0	0	0	0	0	0	0	0	0	0	0	0	0	0	0	0	0	0	0	0	0	0	0	0	0	0	0	0	0	0	0	0	0	0	0	0	0	0	0	1.20806	0	0	0
k__Bacteria|p__Actinobacteria|c__Actinobacteria|o__Nakamurellales|f__Nakamurellaceae|g__Nakamurella|s__Nakamurella_multipartita	0	0	0	0	0	0	0	0	0	0	0	0	0	0	0	0	0	0	0	0	0	0	0	0	0	0	0	0	0	0	0	0	0	0	0	0	0	0	0	0	0	0	0	0	0	0	0	0	0
k__Bacteria|p__Actinobacteria|c__Actinobacteria|o__Propionibacteriales|f__Propionibacteriaceae|g__Cutibacterium|s__Cutibacterium_acnes	0.05518	0.02712	0.73378	0.12351	0.01651	0	0.2388	0	0.08312	0.0066	0.37428	0.42798	1.88874	0	0	0.04949	0.03974	1.61774	0	5.85705	0.44072	0	0	2.11606	0	0	0.0459	0	0.14593	0	0	0	0	0.04454	0.02908	0.00201	0	0	0	0	0	0	0.33559	1.21836	0	8.14067	6.64115	35.6821	0
k__Bacteria|p__Actinobacteria|c__Coriobacteriia|o__Coriobacteriales|f__Coriobacteriaceae|g__Collinsella|s__Collinsella_aerofaciens	0	0	0	0	0	0	0	0	0	0	0	0	4.81316	6.24843	4.8963	1.01613	3.57442	5.06439	3.1391	6.71668	4.60077	4.85255	1.29579	3.14329	1.24211	0.76351	0.93726	1.60784	1.41849	1.15914	0.5977	0.74724	0.81243	1.19824	1.05496	0.84502	10.4234	10.9199	16.5284	24.3785	23.2361	27.7698	19.4156	25.233	0	17.3477	93.3589	1.86906	4.20828
k__Bacteria|p__Actinobacteria|c__Coriobacteriia|o__Coriobacteriales|f__Coriobacteriaceae|g__Collinsella|s__Collinsella_intestinalis	3.54584	3.71339	4.45373	2.19976	1.95631	1.10734	1.63734	1.71695	0.4358	0.3455	0.31575	0.15478	0	0	0	0.0186	0.548	0.1124	0	0.38952	0.4734	0	0	0	0	0	0	0	0	0	0	0	0	0	0	0	0	0	0	0	0	0	0	0	0	0	0	0	0
k__Bacteria|p__Actinobacteria|c__Coriobacteriia|o__Coriobacteriales|f__Coriobacteriaceae|g__Collinsella|s__Collinsella_stercoris	0	0.13179	0	0.04488	0.05654	0	0.00806	0	0	0.00794	0	0	0	0	0	0	0.04885	0	0	0	0	0	0	0	0	0.00411	0.0028	0	0	0	0	0	0	0.00111	0	0.0021	0.05192	0	0	0	0	0	0.1491	0.10363	0	0	0	0	0
k__Bacteria|p__Actinobacteria|c__Coriobacteriia|o__Coriobacteriales|f__Coriobacteriaceae|g__Enorma|s__Collinsella_massiliensis	0	0	0	0	0	0	0	0	0	0	0	0	0	0	0	0	0.00397	0	0	0	0	0	0	0	0	0.00187	0	0	0	0	0	0	0	0.00115	0	0	0	0	0	0	0	0	0.03286	0	0	0	0	0	0
k__Bacteria|p__Actinobacteria|c__Coriobacteriia|o__Coriobacteriales|f__Coriobacteriaceae|g__Enorma|s__Enorma_massiliensis	0	0	0	0	0	0	0	0	0	0	0	0	0	0	0	0	0	0	0	0	0	0	0	0	0	0.00043	0	0	0	0	0	0	0	0	0	0	0	0	0	0	0	0	0	0	0	0	0	0	0
k__Bacteria|p__Actinobacteria|c__Coriobacteriia|o__Eggerthellales|f__Eggerthellaceae|g__Adlercreutzia|s__Adlercreutzia_equolifaciens	0	0.01566	0	0	0	0.00418	0	0	0	0.00806	0	0	0	0	0	0	0	0	0	0	0	0	0	0	0.1397	0.2075	0.08061	0	0	0	0.02441	0.02001	0.02876	0.03341	0.03325	0.03103	0	0	0	0	0	0	0	0	0	0	0	0	0
k__Bacteria|p__Actinobacteria|c__Coriobacteriia|o__Eggerthellales|f__Eggerthellaceae|g__Asaccharobacter|s__Asaccharobacter_celatus	0	0.01544	0	0.02541	0.01906	0.05809	0.00278	0	0	0.01009	0	0	0	0	0	0	0	0	0	0	0	0	0	0	0.4117	0.8119	0.27963	0	0.0914	0.00856	0.07238	0.06856	0.06977	0.11939	0.119	0.0758	0	0	0	0	0	0	0	0	0	0	0	0	0
k__Bacteria|p__Actinobacteria|c__Coriobacteriia|o__Eggerthellales|f__Eggerthellaceae|g__Eggerthella|s__Eggerthella_lenta	0	0.05618	0	0.14447	0.15075	0.05144	0	0	0	0.03151	0	0	0	0	0	0	0	0	0	0	0	0	0	0	0.35447	0.49954	0.20612	0	0	0	0.05753	0.06664	0.07547	0.08133	0.14033	0.06041	0	0	0	0	0	0	0	0	0	0	0	0	0
k__Bacteria|p__Actinobacteria|c__Coriobacteriia|o__Eggerthellales|f__Eggerthellaceae|g__Enterorhabdus|s__Enterorhabdus_caecimuris	0	0	0	0	0	0	0	0	0	0	0	0	0	0	0	0	0	0	0	0	0	0	0	0	0	0.01736	0.00266	0	0	0	0	0	0	0	0	0.00039	0	0	0	0	0	0	0	0	0	0	0	0	0
k__Bacteria|p__Actinobacteria|c__Coriobacteriia|o__Eggerthellales|f__Eggerthellaceae|g__Gordonibacter|s__Gordonibacter_pamelaeae	0	0	0	0.01281	0	0	0.00259	0	0	0.01149	0	0	0	0	0	0	0	0	0	0	0	0	0	0	0.0387	0.10113	0.03326	0	0	0	0.00767	0.00572	0.00077	0.01553	0.00741	0.01332	0	0	0	0	0	0	0	0	0	0	0	0	0
k__Bacteria|p__Actinobacteria|c__Coriobacteriia|o__Eggerthellales|f__Eggerthellaceae|g__Slackia|s__Slackia_isoflavoniconvertens	0	0	0	0	0	0	0	0	0	0	0	0	0.73609	0.98486	0.50909	0.09274	0.78654	0	0	0	0.33897	0	0	0	0	0	0	0	0	0	0	0	0	0	0	0	0	0	0	0	0	0	0	0	0	0	0	0	0
k__Bacteria|p__Bacteroidetes|c__Bacteroidia|o__Bacteroidales|f__Bacteroidaceae|g__Bacteroides|s__Bacteroides_caccae	0	0	0	0	0	0	0	0	0	0	0	0	0	0	0	0	0	0	0	0	0	0	0	0	0	0	0	0	0	0	0	0	0	0	0	0	5.64737	6.95055	4.46205	0	0	4.49092	4.16107	2.84118	0	0	0	0	0
k__Bacteria|p__Bacteroidetes|c__Bacteroidia|o__Bacteroidales|f__Bacteroidaceae|g__Bacteroides|s__Bacteroides_cellulosilyticus	0	0	0	0	0	0	0	0	0	0	0	0	0	0	0	0	0.00229	0	0	0	0	0	0	0	0.25382	0.71072	0.32337	0	0	0	0.49758	0.47273	0.69928	0.53449	0.62267	0.70944	0	0	0	0	0	0	0	0	0	0	0	0	0
k__Bacteria|p__Bacteroidetes|c__Bacteroidia|o__Bacteroidales|f__Bacteroidaceae|g__Bacteroides|s__Bacteroides_coprocola	0	0	0	0	0	0	0	0	0	0	0	0	6.22536	8.5241	9.84122	1.78104	6.32115	5.04309	4.53239	4.34038	5.28375	5.79773	4.71637	2.84213	0	0	0	0	0	0	0	0	0	0	0	0	0	0	0	0	0	0	0	0	0	0	0	0	0
k__Bacteria|p__Bacteroidetes|c__Bacteroidia|o__Bacteroidales|f__Bacteroidaceae|g__Bacteroides|s__Bacteroides_dorei	0	0	0	0	0	0	0	0	0	0	0	0	0	0	0	0	0	0	0	0	0	0	0	0	0	0	0	0	0	0	0	0	0	0	0	0	0	0	0	0	0	0	0	0	0	0	0	0	3.82216
k__Bacteria|p__Bacteroidetes|c__Bacteroidia|o__Bacteroidales|f__Bacteroidaceae|g__Bacteroides|s__Bacteroides_eggerthii	0	0	0	0	0	0	0	0	0	0	0	0	0	0	0	0	0	0	0	0	0	0	0	0	0	0	0	0	0	0	0	0	0	0	0	0	0	0	0	0	0	0	0	0	0	0	0	0	0
k__Bacteria|p__Bacteroidetes|c__Bacteroidia|o__Bacteroidales|f__Bacteroidaceae|g__Bacteroides|s__Bacteroides_faecis	0	0	0	0	0	0	0	0	0	0	0	0	0	0	0	0	0	0	0	0	0	0	0	0	0.70783	0.83085	1.45573	0	0.41487	0.22351	1.62632	1.32225	2.54743	1.29584	1.35688	1.70228	0	0	0	0	0	0	0	0	0	0	0	0	0
k__Bacteria|p__Bacteroidetes|c__Bacteroidia|o__Bacteroidales|f__Bacteroidaceae|g__Bacteroides|s__Bacteroides_faecis_CAG_32	0	0	0	0	0	0	0	0	0	0	0	0	0	0	0	0	0	0	0	0	0	0	0	0	0.08336	0.2555	0.26161	0	0	0	0.33288	0.28331	0.47863	0.40359	0.37472	0.38596	0	0	0	0	0	0	0	0	0	0	0	0	0
k__Bacteria|p__Bacteroidetes|c__Bacteroidia|o__Bacteroidales|f__Bacteroidaceae|g__Bacteroides|s__Bacteroides_finegoldii	0	0	0	0	0	0	0	0	0	0	0	0	0	0	0	0.02207	0.59447	0.20908	0	0	0.37629	0	0	0	2.05801	2.29443	1.62953	0	0.61802	0.54171	2.8907	1.89307	2.31599	1.9326	2.15357	2.6687	0	0	0	0	0	0	0	0	0	0	0	0	0
k__Bacteria|p__Bacteroidetes|c__Bacteroidia|o__Bacteroidales|f__Bacteroidaceae|g__Bacteroides|s__Bacteroides_fragilis	11.4574	11.3318	10.3625	11.6156	9.60526	5.64554	9.6533	7.31436	5.60045	0.94573	0.43739	0.82924	0	0	0	0	0	0	0	0	0	0	0	0	0	0	0	0	0	0	0	0	0	0	0	0	0	0	0	0	0	0	0	0	0	0	0	0	0
k__Bacteria|p__Bacteroidetes|c__Bacteroidia|o__Bacteroidales|f__Bacteroidaceae|g__Bacteroides|s__Bacteroides_galacturonicus	0	0	0	0	0	0	0	0	0	0	0	0	0	0	0	0	0	0	0	0	0	0	0	0	0	0	0	0	0	0	0	0	0	0	0	0.00564	0	0	0	0	0	0	0	0	0	0	0	0	0
k__Bacteria|p__Bacteroidetes|c__Bacteroidia|o__Bacteroidales|f__Bacteroidaceae|g__Bacteroides|s__Bacteroides_massiliensis	0	0	0	0	0	0	0	0	0	0	0	0	1.04838	0	1.68622	0.52299	2.40687	0.90205	0.89624	0.60866	0.81387	0	0.93514	0	0	0	0	0	0	0	0	0	0	0	0	0	4.13019	3.19087	3.50949	0	0	0.99762	2.46947	0	0	0	0	0	1.02942
k__Bacteria|p__Bacteroidetes|c__Bacteroidia|o__Bacteroidales|f__Bacteroidaceae|g__Bacteroides|s__Bacteroides_nordii	0.26225	0.20767	0.1867	0.26106	0.37571	0.15933	0.35394	0	0.07163	0.02952	0	0	0	0	0	0	0	0	0	0	0	0	0	0	0	0	0	0	0	0	0	0	0	0	0	0	0	0	0	0	0	0	0	0	0	0	0	0	0
k__Bacteria|p__Bacteroidetes|c__Bacteroidia|o__Bacteroidales|f__Bacteroidaceae|g__Bacteroides|s__Bacteroides_ovatus	0.50218	0.67366	1.55032	0.35149	1.15195	3.24162	0.45903	0.70365	0.3327	0.09133	0.1299	0.02425	0.42569	0.28073	0.64304	0.0541	0.5283	0.18056	0.05187	0	0.57208	0	0.27561	0	0	0.01075	0.00591	0	0	0	0.01606	0.01916	0.01366	0.01907	0.01597	0.01294	0	0	0	0	0	0	0	0	0	0	0	0	0
k__Bacteria|p__Bacteroidetes|c__Bacteroidia|o__Bacteroidales|f__Bacteroidaceae|g__Bacteroides|s__Bacteroides_salyersiae	0	0	0	0	0	0	0	0	0	0	0	0	1.06202	0.77096	1.19527	0.23634	0.80686	0.5415	1.9001	1.34855	2.67244	2.68166	3.25889	1.45849	0	0	0	0	0	0	0	0	0	0	0	0	0	0	0	0	0	0	0	0	0	0	0	0	0.18832
k__Bacteria|p__Bacteroidetes|c__Bacteroidia|o__Bacteroidales|f__Bacteroidaceae|g__Bacteroides|s__Bacteroides_stercoris	5.38103	5.14722	5.29216	6.05536	6.03465	10.0245	1.57773	2.38294	1.16857	0.62998	0.23995	0.46475	6.19619	5.76903	5.31174	2.66495	8.00372	7.51389	10.6422	3.81212	3.96165	8.83805	11.3559	15.4333	0	0	0	0	0	0	0	0	0	0	0	0	1.84665	0.84045	0.36053	0	0	0.71441	1.43649	0	0	0	0	0	1.57342
k__Bacteria|p__Bacteroidetes|c__Bacteroidia|o__Bacteroidales|f__Bacteroidaceae|g__Bacteroides|s__Bacteroides_thetaiotaomicron	0.1681	0.32134	0	0.28114	0.23668	0.30782	0.21281	0	0	0.03366	0	0	0.2221	0	0	0	0.10905	0	0	0	0.19179	0	0	0	0	0	0	0	0	0	0	0	0	0	0	0	0.2581	0.20505	0	0	0	0	0.27763	0	0	0	0	0	0.18416
k__Bacteria|p__Bacteroidetes|c__Bacteroidia|o__Bacteroidales|f__Bacteroidaceae|g__Bacteroides|s__Bacteroides_uniformis	12.6448	11.5563	10.2555	10.7682	10.1021	13.5503	1.92416	3.34034	1.05403	0.92538	0.43053	0.47019	0.16729	0	0.52515	0.2104	0.81267	0.27546	0	0	0.44307	0	0.77158	0	5.53392	9.96912	4.01533	0	1.20298	0.74687	4.73	4.79613	6.00632	5.39813	5.46525	5.86873	0.20161	0	0.10459	0	0	0	0	0	0	0	0	0	2.63019
k__Bacteria|p__Bacteroidetes|c__Bacteroidia|o__Bacteroidales|f__Bacteroidaceae|g__Bacteroides|s__Bacteroides_vulgatus	21.7256	19.6211	22.6728	19.7763	22.4284	18.8194	13.2029	11.1038	7.84217	1.79846	1.33876	0.75426	18.4436	23.0442	20.2314	4.6607	10.6316	17.1622	23.5401	23.4581	18.6223	28.6009	27.0513	28.0993	41.7903	30.4844	42.5554	38.5595	35.9813	34.2178	38.3606	40.6803	40.9926	33.2821	38.8357	33.1162	25.5003	26.1124	22.0399	19.8619	48.1824	14.4636	21.4416	5.45495	0	0	0	0	27.3407
k__Bacteria|p__Bacteroidetes|c__Bacteroidia|o__Bacteroidales|f__Bacteroidaceae|g__Bacteroides|s__Bacteroides_xylanisolvens	1.14137	1.15004	1.08817	1.84971	1.8501	3.65482	0.49934	0.26706	0.10778	0.22451	0.01149	0.00584	0.17871	0	0	0	0.26704	0	0	0	0.07674	0	0	0	0.1933	0.29026	0.19385	0	0	0	0.30725	0.37281	0.3376	0.41251	0.22513	0.25257	0	0	0	0	0	0	0	0	0	0	0	0	0
k__Bacteria|p__Bacteroidetes|c__Bacteroidia|o__Bacteroidales|f__Barnesiellaceae|g__Coprobacter|s__Coprobacter_fastidiosus	0	0	0	0	0	0	0	0	0	0	0	0	0	0	0	0	0.09836	0	0	0	0	0	0	0	0	0	0	0	0	0	0	0	0	0	0	0	0	0	0	0	0	0	0	0	0	0	0	0	0
k__Bacteria|p__Bacteroidetes|c__Bacteroidia|o__Bacteroidales|f__Odoribacteraceae|g__Odoribacter|s__Odoribacter_splanchnicus	0	0	0	0	0	0	0	0	0	0	0	0	3.71598	0.51965	3.07034	0.99984	2.88395	2.52764	2.71337	1.88441	4.45704	1.94383	4.39634	4.09628	1.8748	2.70055	2.02906	0	0.67766	0.62374	2.75072	2.39903	2.91394	2.04362	2.49673	1.87852	0	0	0	0	0	0	0	0	0	0	0	0	0
k__Bacteria|p__Bacteroidetes|c__Bacteroidia|o__Bacteroidales|f__Prevotellaceae|g__Prevotella|s__Prevotella_copri	0	0	0	0	0	0	0	0	0	0	0	0	0	0	0	0	0	0	0	0	0	0	0	0	0	0	0	0	0	0	0	0	0	0	0	0	0	0	0	0	0	0	0	0	0	0	0	0	14.8332
k__Bacteria|p__Bacteroidetes|c__Bacteroidia|o__Bacteroidales|f__Prevotellaceae|g__Prevotella|s__Prevotella_histicola	0	0	0	0	0	0	0	0	0	0	0	0	0	0	0	0.41454	0	0	0	0	0	0	0	0	0	0	0	0	0	0	0	0	0	0	0	0	0	0	0	0	0	0	0	0	0	0	0	0	0
k__Bacteria|p__Bacteroidetes|c__Bacteroidia|o__Bacteroidales|f__Prevotellaceae|g__Prevotella|s__Prevotella_melaninogenica	0	0	0	0	0	0	0	0	0	0	0	0	0	0	0	0.69634	0	0	0	0	0	0	0	0	0	0	0	0	0	0	0	0	0	0	0	0	0	0	0	0	0	0	0	0	0	0	0	0	0
k__Bacteria|p__Bacteroidetes|c__Bacteroidia|o__Bacteroidales|f__Prevotellaceae|g__Prevotella|s__Prevotella_pallens	0	0	0	0	0	0	0	0	0	0	0	0	0	0	0	2.37904	0.00614	0	0	0	0	0	0	0	0	0	0	0	0	0	0	0	0	0	0	0	0	0	0	0	0	0	0	0	0	0	0	0	0
k__Bacteria|p__Bacteroidetes|c__Bacteroidia|o__Bacteroidales|f__Prevotellaceae|g__Prevotella|s__Prevotella_salivae	0	0	0	0	0	0	0	0	0	0	0	0	0	0	0	0	0	0	0	0	0	0	0	0	0	0	0	0	0	0	0	0	0	0	0	0	0	0	0	0	0	0	0	0	0	0	0	0	0
k__Bacteria|p__Bacteroidetes|c__Bacteroidia|o__Bacteroidales|f__Prevotellaceae|g__Prevotella|s__Prevotella_sp_CAG_279	0	0	0	0	0	0	0	0	0	0	0	0	0	0	0	0	0	0	0	0	0	0	0	0	1.43306	2.87373	1.73074	0	0.15832	0.83449	2.7156	2.54001	1.868	1.3099	2.15555	1.76307	0	0	0	0	0	0	0	0	0	0	0	0	0
k__Bacteria|p__Bacteroidetes|c__Bacteroidia|o__Bacteroidales|f__Rikenellaceae|g__Alistipes|s__Alistipes_finegoldii	1.28855	0.82157	0.61545	1.43175	2.05581	3.08836	0.53602	0.38403	0.073	0.17938	0	0	1.29888	0	1.47347	0.32867	0.70867	0.51458	0.6635	0.88236	1.47195	0	0.86453	0.99009	0.01402	0.05779	0.02618	0	0	0	0.083	0.07996	0.08449	0.10133	0.06929	0.09565	0	0	0	0	0	0	0	0	0	0	0	0	0.35415
k__Bacteria|p__Bacteroidetes|c__Bacteroidia|o__Bacteroidales|f__Rikenellaceae|g__Alistipes|s__Alistipes_indistinctus	0	0	0	0	0	0	0	0	0	0	0	0	0	0	0	0	0	0	0	0	0	0	0	0	0	0.04396	0.04277	0	0	0	0.0544	0.03959	0.03411	0.08832	0.05331	0.08754	0	0	0	0	0	0	0	0	0	0	0	0	0
k__Bacteria|p__Bacteroidetes|c__Bacteroidia|o__Bacteroidales|f__Rikenellaceae|g__Alistipes|s__Alistipes_inops	0	0	0	0	0	0	0	0	0	0	0	0	0	0	0	0	0	0	0	0	0	0	0	0	0.70468	1.03354	0.79877	0	0.86569	0.99305	2.09414	2.15389	2.46006	2.4722	2.02435	2.45876	0	0	0	0	0	0	0	0	0	0	0	0	0
k__Bacteria|p__Bacteroidetes|c__Bacteroidia|o__Bacteroidales|f__Rikenellaceae|g__Alistipes|s__Alistipes_onderdonkii	0	0	0	0	0	0	0	0	0	0	0	0	0	0	0	0	0	0	0	0	0	0	0	0	0.1631	0.29437	0.16363	0	0.27019	0.16806	0.42572	0.44459	0.51016	0.54632	0.40752	0.5442	0	0	0	0	0	0	0	0	0	0	0	0	0
k__Bacteria|p__Bacteroidetes|c__Bacteroidia|o__Bacteroidales|f__Rikenellaceae|g__Alistipes|s__Alistipes_putredinis	7.3779	9.51298	7.80017	7.20333	7.77578	10.2803	3.01169	1.9865	1.86075	1.00404	0.43519	0.43519	11.938	13.6318	9.01058	4.573	8.63639	12.0966	13.0996	11.4516	12.3045	18.6339	12.673	19.2092	8.27174	21.9805	7.36833	4.95356	3.6608	3.94537	9.1537	8.86041	9.32833	9.35318	7.99556	8.70807	0	0	0	0	0	0	0	0	0	0	0	0	1.40464
k__Bacteria|p__Bacteroidetes|c__Bacteroidia|o__Bacteroidales|f__Rikenellaceae|g__Alistipes|s__Alistipes_shahii	0	0	0	0	0	0	0	0	0	0	0	0	0.27082	0.05308	0.21836	0.06018	0.42311	0.09726	0	0	0.34433	0	0.48874	0	0.28088	0.5482	0.27923	0	0.11205	0.11661	0.73435	0.59712	0.39471	0.51747	0.5095	0.73686	0	0	0	0	0	0	0	0	0	0	0	0	0
k__Bacteria|p__Bacteroidetes|c__Bacteroidia|o__Bacteroidales|f__Tannerellaceae|g__Parabacteroides|s__Parabacteroides_distasonis	0.59861	1.10955	0.3127	0.56408	0.97108	0.76885	0.57713	0	0.18209	0.07563	0	0	3.73605	3.86145	3.37884	0.58298	1.51521	2.33744	2.66547	4.83042	3.07344	4.06243	4.40229	2.85038	0.83646	1.07532	0.70159	0	0.63078	0.50307	0.69038	0.67961	0.61607	0.92291	0.775	0.74306	0	0	0	0	0	0	0	0	0	0	0	0	0.62594
k__Bacteria|p__Bacteroidetes|c__Bacteroidia|o__Bacteroidales|f__Tannerellaceae|g__Parabacteroides|s__Parabacteroides_merdae	4.61403	3.28507	4.92293	4.88701	4.93324	6.50832	3.75034	2.36712	2.43535	0.3575	0.10445	0.10557	6.53643	5.23095	6.96995	1.33783	3.3734	4.33586	4.08828	3.40152	4.30861	7.09297	5.46366	4.85075	0.2938	0.36785	0.42429	0	0.0605	0.08573	0.49113	0.47774	0.64631	0.53373	0.38473	0.53595	0.10941	0	0	0	0	0	0.03023	0	0	0	0	0	1.18706
k__Bacteria|p__Bacteroidetes|c__Flavobacteriia|o__Flavobacteriales|f__Flavobacteriaceae|g__Capnocytophaga|s__Capnocytophaga_gingivalis	0	0	0	0	0	0	0	0	0	0	0	0	0	0	0	6.01737	0	0	0	0	0	0	0	0	0	0	0	0	0	0	0	0	0	0	0	0	0	0	0	0	0	0	0	0	0	0	0	0	0
k__Bacteria|p__Firmicutes|c__Bacilli|o__Bacillales|f__Bacillales_unclassified|g__Gemella|s__Gemella_morbillorum	0	0	0	0	0	0	0	0	0	0	0	0	0	0	0	0	0	0	0	0	0	0	0	0	0	0	0.01771	0	0	0	0	0	0	0	0	0	0	0	0	0	0	0	0	0	0	0	0	0	0
k__Bacteria|p__Firmicutes|c__Bacilli|o__Bacillales|f__Bacillales_unclassified|g__Gemella|s__Gemella_sanguinis	0	0.07696	0.10202	0.16082	0	0.11299	0	0	0	0.00198	0	0	0	0	0	1.74208	0.09819	0	0	0	0	0	0	0	0	0	0	0	0	0	0	0	0	0	0	0	0	0	0	0	0	0	0	0	0	0	0	0	0
k__Bacteria|p__Firmicutes|c__Bacilli|o__Bacillales|f__Staphylococcaceae|g__Staphylococcus|s__Staphylococcus_epidermidis	0	0	0.24515	0	0	0	0	0	0	0	0	0	0	0	0	0	0	0	0	0	0	0	0	0	0	0	0	0	0	0	0	0	0	0	0	0	0	0	0	0	0	0	0	0	0	0	0	0	0
k__Bacteria|p__Firmicutes|c__Bacilli|o__Bacillales|f__Staphylococcaceae|g__Staphylococcus|s__Staphylococcus_hominis	0	0	0	0	0	0	0	0	0	0	0	0.27216	0	0	0	0	0	0	0	0	0	0	0	0	0	0	0	0	0	0	0	0	0	0	0	0	0	0	0	0	0	0	0	0	0	0	0	0	0
k__Bacteria|p__Firmicutes|c__Bacilli|o__Lactobacillales|f__Lactobacillaceae|g__Lactobacillus|s__Lactobacillus_rogosae	0	0	0	0	0	0	0	0	0	0	0	0	0	0	0	0	0	0	0	0	0	0	0	0	0	0.00753	0.00228	0	0	0	0.00188	0.00966	0	0	0	0.0095	0	0	0	0	0	0	0	0	0	0	0	0	0
k__Bacteria|p__Firmicutes|c__Bacilli|o__Lactobacillales|f__Lactobacillaceae|g__Lactobacillus|s__Lactobacillus_salivarius	0	0	0	0	0	0	0	0	0	0	0	0	0	0	0	0	0	0	0	0	0	0	0	0	0	0.02443	0	0	0	0	0	0	0	0	0	0.00241	0	0	0	0	0	0	0	0	0	0	0	0	0
k__Bacteria|p__Firmicutes|c__Bacilli|o__Lactobacillales|f__Streptococcaceae|g__Streptococcus|s__Streptococcus_australis	0	0	0	0.00563	0	0	0	0	0	0	0	0	0	0	0	0.13376	0	0	0	0	0	0	0	0	0	0	0	0	0	0	0	0	0	0	0	0	0	0	0	0	0	0	0	0	0	0	0	0	0
k__Bacteria|p__Firmicutes|c__Bacilli|o__Lactobacillales|f__Streptococcaceae|g__Streptococcus|s__Streptococcus_gordonii	0	0	0	0	0	0	0	0	0	0	0	0	0	0	0	0	0	0	0	0	0	0	0	0	0	0	0.00881	0	0	0	0	0	0	0	0	0	0	0	0	0	0	0	0	0	0	0	0	0	0
k__Bacteria|p__Firmicutes|c__Bacilli|o__Lactobacillales|f__Streptococcaceae|g__Streptococcus|s__Streptococcus_infantis	0	0	0.12115	0	0	0	0	0	0	0	0	0	0	0	0	0.76751	0	0	0	0	0	0	0	0	0	0	0	0	0	0	0	0	0	0	0	0	0	0	0	0	0	0	0	0	0	0	0	0	0
k__Bacteria|p__Firmicutes|c__Bacilli|o__Lactobacillales|f__Streptococcaceae|g__Streptococcus|s__Streptococcus_mitis	0	0	0.19888	0.18269	0	0	0	0	0	0	0	0	0	0	0	0	0.03824	0	0	0	0	0	0	0	0	0.00158	0.057	0	0	0	0	0	0	0	0	0	0	0	0	0	0	0	0	0	0	0	0	0	0
k__Bacteria|p__Firmicutes|c__Bacilli|o__Lactobacillales|f__Streptococcaceae|g__Streptococcus|s__Streptococcus_oralis	0	0	0	0.0477	0	0	0	0	0	0	0	0	0	0	0	0	0	0	0	0	0	0	0	0	0	0.00338	0.02568	0	0	0	0	0	0	0	0	0.00039	0	0	0	0	0	0	0	0	0	0	0	0	0
k__Bacteria|p__Firmicutes|c__Bacilli|o__Lactobacillales|f__Streptococcaceae|g__Streptococcus|s__Streptococcus_parasanguinis	0	0	0	0	0	0	0	0	0	0	0	0	0	0	0	0	0	0	0	0	0	0	0	0	0	0	0	0	0	0	0	0	0	0	0	0	0.1258	0	0	0	0	0	0	0	0	0	0	0	0
k__Bacteria|p__Firmicutes|c__Bacilli|o__Lactobacillales|f__Streptococcaceae|g__Streptococcus|s__Streptococcus_salivarius	0	0	0	0	0.46906	0	0	0	0	0	0	0	0	0	0	0.60425	0	0	0	0	0	0	0	0	0	0	0	0	0	0	0	0	0	0	0	0	0.4476	0.31732	0.10926	0	0	0	0.0111	0	0	0	0	0	0
k__Bacteria|p__Firmicutes|c__Bacilli|o__Lactobacillales|f__Streptococcaceae|g__Streptococcus|s__Streptococcus_sp_A12	0	0	0	0	0	0	0	0	0	0	0	0	0	0	0	0.05993	0	0	0	0	0	0	0	0	0	0	0	0	0	0	0	0	0	0	0	0	0	0	0	0	0	0	0	0	0	0	0	0	0
k__Bacteria|p__Firmicutes|c__Clostridia|o__Clostridiales|f__Clostridiaceae|g__Clostridium|s__Clostridium_bolteae_CAG_59	0	0	0	0	0	0	0	0	0	0	0	0	0	0	0	0	0	0	0	0	0	0	0	0	0	0.0332	0.01218	0	0	0	0	0.00184	0	0	0	0.00547	0	0	0	0	0	0	0	0	0	0	0	0	0
k__Bacteria|p__Firmicutes|c__Clostridia|o__Clostridiales|f__Clostridiaceae|g__Clostridium|s__Clostridium_paraputrificum	0	0	0	0	0	0	0	0	0	0	0	0	0	0	0	0	0	0	0	0	0	0	0	0	0	0	0	0	0	0	0	0	0	0	0	0	0	0	0	0	0	0	0	0	0	0	0	0	0
k__Bacteria|p__Firmicutes|c__Clostridia|o__Clostridiales|f__Clostridiaceae|g__Clostridium|s__Clostridium_sp_CAG_58	0	0.12987	0.02209	0.16267	0.25105	0.20559	0	0	0	0.00588	0	0	0	0	0	0	0.19261	0	0	0	0.37522	0	0	0	0.24665	0.26467	0.30118	0	0	0.42408	0.17612	0.16402	0.14621	0.11599	0.26147	0.19883	0	0	0	0	0	0	0	0	0	0	0	0	0
k__Bacteria|p__Firmicutes|c__Clostridia|o__Clostridiales|f__Clostridiales_Family_XIII_Incertae_Sedis|g__Clostridiales_Family_XIII_Incertae_Sedis_unclassified|s__Eubacterium_brachy	0	0	0	0	0	0	0	0	0	0	0	0	0	0	0	0	0	0	0	0	0	0	0	0	0	0	0.00267	0	0	0	0	0	0	0	0	0	0	0	0	0	0	0	0	0	0	0	0	0	0
k__Bacteria|p__Firmicutes|c__Clostridia|o__Clostridiales|f__Clostridiales_Family_XIII_Incertae_Sedis|g__Mogibacterium|s__Mogibacterium_diversum	0	0	0	0	0	0	0	0	0	0	0	0	0	0	0	0	0	0	0	0	0	0	0	0	0	0	0	0	0	0	0	0	0	0	0	0	0	0	0	0	0	0	0	0	0	0	0	0	0
k__Bacteria|p__Firmicutes|c__Clostridia|o__Clostridiales|f__Clostridiales_unclassified|g__Clostridiales_unclassified|s__Clostridiales_bacterium_1_7_47FAA	0	0	0	0	0	0	0	0	0	0	0	0	0	0	0	0	0	0	0	0	0	0	0	0	0	0.00165	0	0	0	0	0	0	0	0	0	0	0	0	0	0	0	0	0	0	0	0	0	0	0
k__Bacteria|p__Firmicutes|c__Clostridia|o__Clostridiales|f__Clostridiales_unclassified|g__Intestinimonas|s__Intestinimonas_butyriciproducens	0	0	0	0	0	0.26295	0	0	0	0	0	0	0	0	0	0	0	0	0	0	0	0	0	0	0	0.01931	0	0	0	0	0	0	0	0	0	0.00487	0	0	0	0	0	0	0	0	0	0	0	0	0
k__Bacteria|p__Firmicutes|c__Clostridia|o__Clostridiales|f__Clostridiales_unclassified|g__Lawsonibacter|s__Lawsonibacter_asaccharolyticus	0	0	0	0	0	0	0	0	0	0	0	0	0	0	0	0	0.2778	0	0	0	0	0	0	0	0	0.06151	0	0	0	0	0	0	0	0	0	0	0	0	0	0	0	0	0	0	0	0	0	0	0
k__Bacteria|p__Firmicutes|c__Clostridia|o__Clostridiales|f__Clostridiales_unclassified|g__Monoglobus|s__Monoglobus_pectinilyticus	0	0	0	0	0	0	0	0	0	0	0	0	0	0	0	0	0	0	0	0	0	0	0	0	0	0.04493	0.00799	0	0	0	0.02305	0.01408	0	0.02999	0.00426	0.028	0	0	0	0	0	0	0	0	0	0	0	0	0
k__Bacteria|p__Firmicutes|c__Clostridia|o__Clostridiales|f__Eubacteriaceae|g__Eubacterium|s__Eubacterium_eligens	0.03913	0.19926	0.15026	0.25302	0.2802	0.59211	0.03618	0	0	0.03619	0	0	0	0	0	0	0.0982	0	0	0	0	0	0	0	0.09094	0.22186	0.08498	0	0	0	0.22518	0.23568	0.26364	0.28469	0.14737	0.32296	0	0	0	0	0	0	0	0	0	0	0	0	0.05058
k__Bacteria|p__Firmicutes|c__Clostridia|o__Clostridiales|f__Eubacteriaceae|g__Eubacterium|s__Eubacterium_hallii	0.35836	0.23698	0	1.15761	0.57626	0.9314	0.41401	0.82639	0	0.04728	0	0	0	0	0	0	0.25235	0	0	0	0.05973	0	0	0	0.06821	0.0572	0.0592	0	0	0.04838	0.04721	0.02714	0.03094	0.04039	0.04148	0.06458	0	0	0	0	0	0	0	0	0	0	0	0	0
k__Bacteria|p__Firmicutes|c__Clostridia|o__Clostridiales|f__Eubacteriaceae|g__Eubacterium|s__Eubacterium_ramulus	0	0	0	0.04614	0	0	0	0	0	0	0	0	0	0	0	0	0.0345	0	0	0	0	0	0	0	0	0.01096	0	0	0	0	0	0	0	0	0	0	0	0	0	0	0	0	0.04379	0	0	0	0	0	0
k__Bacteria|p__Firmicutes|c__Clostridia|o__Clostridiales|f__Eubacteriaceae|g__Eubacterium|s__Eubacterium_sp_CAG_38	0	0	0	0	0	0	0	0	0	0	0	0	0	0	0	0	0	0	0	0	0	0	0	0	0	0.03051	0	0	0	0	0.0227	0.0403	0	0.00809	0.03013	0.03575	0	0	0	0	0	0	0	0	0	0	0	0	0
k__Bacteria|p__Firmicutes|c__Clostridia|o__Clostridiales|f__Eubacteriaceae|g__Eubacterium|s__Eubacterium_ventriosum	0	0	0	0	0	0	0	0	0	0	0	0	0	0	0	0	0	0	0	0	0	0	0	0	0	0.00024	0	0	0	0	0	0	0	0	0	0	0	0	0	0	0	0	0	0	0	0	0	0	0
k__Bacteria|p__Firmicutes|c__Clostridia|o__Clostridiales|f__Lachnospiraceae|g__Anaerostipes|s__Anaerostipes_hadrus	0	0	0.03358	0.17788	0.15122	0.12762	0	0	0	0.02506	0	0	0.58203	0	0	0.05996	0.7627	0.47768	0	0	0.44689	0	0	0	0.06779	0.11539	0.10831	0	0	0.01185	0.12347	0.12716	0.0895	0.12199	0.02879	0.11224	4.73035	4.62373	4.68173	0	0	6.75157	4.33253	2.22595	0	0	0	0	0
k__Bacteria|p__Firmicutes|c__Clostridia|o__Clostridiales|f__Lachnospiraceae|g__Anaerotignum|s__Anaerotignum_lactatifermentans	0	0	0	0	0	0	0	0	0	0	0	0	0	0	0	0	0.15317	0	0	0	0	0	0	0	0	0	0	0	0	0	0	0	0	0	0	0	0	0	0	0	0	0	0	0	0	0	0	0	0
k__Bacteria|p__Firmicutes|c__Clostridia|o__Clostridiales|f__Lachnospiraceae|g__Blautia|s__Blautia_hydrogenotrophica	0	0	0	0	0	0	0	0	0	0	0	0	0	0	0	0	0	0	0	0	0	0	0	0	0	0.01159	0	0	0	0	0	0	0	0	0	0	0	0	0	0	0	0	0	0	0	0	0	0	0
k__Bacteria|p__Firmicutes|c__Clostridia|o__Clostridiales|f__Lachnospiraceae|g__Blautia|s__Blautia_obeum	2.90415	2.04048	2.40168	3.81649	2.76698	1.50969	1.15107	1.44208	0.41466	0.32724	0.14147	0.18924	0.09528	0	0.48908	0	0.33056	0	0	0	0.40125	0	0	0	1.71242	0.64412	1.43038	2.63335	1.47532	1.92076	0.6951	0.73107	0.9354	0.94338	1.04397	0.68631	0.35863	0	0.11166	0	0	1.46499	0.90858	0.49105	0	0	0	0	2.17807
k__Bacteria|p__Firmicutes|c__Clostridia|o__Clostridiales|f__Lachnospiraceae|g__Blautia|s__Blautia_wexlerae	0.35425	0	0	0	0.02997	0.02695	0.02413	0	0	0.01366	0	0	0.09224	0	0.44048	0.08513	0.01211	0.2195	0	0.08385	0.19364	0	0.08261	0	0.03836	0.05066	0.05235	0	0	0	0.01988	0.04844	0.02762	0.01006	0	0.04939	0	0	0	0	0	0	0	0	0	0	0	0	0
k__Bacteria|p__Firmicutes|c__Clostridia|o__Clostridiales|f__Lachnospiraceae|g__Blautia|s__Ruminococcus_gnavus	0	0	0	0	0	0	0.01646	0	0	0	0	0	0	0	0	0	0.3434	0	0	0	0.41554	0	0	0	0	0.00147	0.02989	0	0	0	0	0	0	0	0	0.01792	8.75297	11.6915	11.8478	34.8473	13.994	10.5777	12.3684	14.4845	0	2.07953	0	0	0
k__Bacteria|p__Firmicutes|c__Clostridia|o__Clostridiales|f__Lachnospiraceae|g__Blautia|s__Ruminococcus_torques	3.22697	2.2303	0.89695	3.8231	2.98049	1.29663	1.19965	0.76872	1.20939	0.24257	0.08094	0.01808	2.29286	4.21845	6.31361	2.89251	11.1493	8.87524	12.8448	10.2996	9.62966	9.17599	7.46745	6.88357	9.63529	2.06852	10.9331	32.7642	24.4044	21.3096	3.17383	2.97564	3.16603	3.97616	3.28258	2.7725	18.6087	17.5233	13.9352	11.5052	10.7149	12.1126	11.1617	16.1345	0	0	0	0	3.85057
k__Bacteria|p__Firmicutes|c__Clostridia|o__Clostridiales|f__Lachnospiraceae|g__Coprococcus|s__Coprococcus_catus	0	0	0	0	0	0	0	0	0	0	0	0	0	0	0	0	0.09744	0	0	0	0	0	0	0	0	0	0	0	0	0	0	0	0	0	0	0	0.43632	0.26744	0.18486	0	0	0.75044	0.51213	1.2961	0	0	0	0	0
k__Bacteria|p__Firmicutes|c__Clostridia|o__Clostridiales|f__Lachnospiraceae|g__Coprococcus|s__Coprococcus_comes	2.68958	3.21963	3.26477	3.36364	2.76885	1.77147	0.77525	1.95268	0.28229	0.45075	0.32136	0.22928	3.45012	3.7059	4.36414	1.61387	3.39009	3.3127	2.51602	3.06223	3.08903	0	1.89141	0	1.07131	0.76553	1.14574	0.10865	2.14072	2.01566	0.85648	0.8116	0.67392	1.15976	0.75988	0.97401	3.37651	3.9031	4.73679	0	0	4.17555	4.74799	4.1296	0	0	0	0	2.30446
k__Bacteria|p__Firmicutes|c__Clostridia|o__Clostridiales|f__Lachnospiraceae|g__Dorea|s__Dorea_formicigenerans	1.49796	0.67441	0.1922	1.76923	1.06825	0.74374	0.36804	0.68684	0	0.19687	0.00392	0	0	0	0.03807	0.4771	1.76356	1.40029	0	0.14197	0.99739	0	0	0	1.9104	1.32135	1.63224	1.36694	2.84669	2.64814	0.72648	0.74411	1.02271	1.04102	1.11616	1.14307	7.49643	8.4724	8.07766	9.40717	3.87266	8.50821	7.04202	6.48352	0	0.41352	0	0	0
k__Bacteria|p__Firmicutes|c__Clostridia|o__Clostridiales|f__Lachnospiraceae|g__Dorea|s__Dorea_longicatena	0.45088	0	0.22124	1.25203	1.16076	1.27992	0.57072	0.484	0.13749	0.15192	0	0	0	0	0	0	0.33629	0	0	0	0	0	0	0	0.19979	0.88491	0.33557	0	0	0.39711	0.62779	0.4597	0.22942	0.01114	0.04316	0.07934	0	0	0	0	0	0	0	0	0	0	0	0	0
k__Bacteria|p__Firmicutes|c__Clostridia|o__Clostridiales|f__Lachnospiraceae|g__Dorea|s__Dorea_sp_CAG_317	0	0	0	0	0	0	0	0	0	0	0	0	0	0	0	0	0.01672	0	0	0	0	0	0	0	0	0	0	0	0	0	0	0	0	0	0	0	0	0	0	0	0	0	0	0	0	0	0	0	0
k__Bacteria|p__Firmicutes|c__Clostridia|o__Clostridiales|f__Lachnospiraceae|g__Eisenbergiella|s__Eisenbergiella_massiliensis	0	0.22352	0	0.1254	0.06172	0.05317	0.10162	0	0	0.05055	0	0	0	0	0	0	0	0	0	0	0	0	0	0	0	0	0	0	0	0	0	0	0	0	0	0	0	0	0	0	0	0	0	0	0	0	0	0	0
k__Bacteria|p__Firmicutes|c__Clostridia|o__Clostridiales|f__Lachnospiraceae|g__Eisenbergiella|s__Eisenbergiella_tayi	0	0	0	0	0	0	0	0	0	0	0	0	0	0	0	0	0	0	0	0	0	0	0	0	0	0	0	0	0	0	0	0	0	0	0	0.00087	0	0	0	0	0	0	0	0	0	0	0	0	0
k__Bacteria|p__Firmicutes|c__Clostridia|o__Clostridiales|f__Lachnospiraceae|g__Fusicatenibacter|s__Fusicatenibacter_saccharivorans	0.74522	0.67804	0.35242	0.20432	0.42934	0.34832	0.02335	0	0	0.07827	0	0	9.24292	12.1979	7.34008	3.80593	6.93903	9.31666	7.23463	8.86759	6.07557	2.30331	3.98861	5.1941	0.06818	0.11029	0.13607	0	0	0	0.17006	0.08456	0.09212	0.1152	0.06606	0.10724	0	0.07667	0	0	0	0	0.01884	0	0	0	0	0	0.04195
k__Bacteria|p__Firmicutes|c__Clostridia|o__Clostridiales|f__Lachnospiraceae|g__Lachnoclostridium|s__Clostridium_bolteae	0	0	0	0	0	0	0	0	0	0	0	0	0	0	0	0	0	0	0	0	0	0	0	0	0.01473	0.04963	0.04096	0	0	0	0.01683	0.01289	0.01202	0.00605	0.00374	0.01351	0	0	0	0	0	0	0	0	0	0	0	0	0
k__Bacteria|p__Firmicutes|c__Clostridia|o__Clostridiales|f__Lachnospiraceae|g__Lachnoclostridium|s__Clostridium_citroniae	0	0	0	0	0.04542	0	0	0	0	0	0	0	0	0	0	0	0	0	0	0	0	0	0	0	0	0.03112	0	0	0	0	0	0	0	0	0	0	0	0	0	0	0	0	0	0	0	0	0	0	0
k__Bacteria|p__Firmicutes|c__Clostridia|o__Clostridiales|f__Lachnospiraceae|g__Lachnoclostridium|s__Clostridium_lavalense	0	0	0	0	0	0	0	0	0	0	0	0	0	0	0	0	0	0	0	0	0	0	0	0	0.05552	0.10059	0.0445	0	0	0	0.03653	0.01858	0.03737	0.03457	0.03124	0.04396	0	0	0	0	0	0	0	0	0	0	0	0	0
k__Bacteria|p__Firmicutes|c__Clostridia|o__Clostridiales|f__Lachnospiraceae|g__Lachnoclostridium|s__Clostridium_saccharolyticum	0	0	0	0	0	0	0	0	0	0	0	0	0	0	0	0	0	0	0	0	0	0	0	0	0	0.00318	0	0	0	0	0	0	0	0	0	0	0	0	0	0	0	0	0	0	0	0	0	0	0
k__Bacteria|p__Firmicutes|c__Clostridia|o__Clostridiales|f__Lachnospiraceae|g__Lachnoclostridium|s__Clostridium_symbiosum	0	0	0	0	0	0	0	0	0	0.00246	0	0	0	0	0	0	0	0	0	0	0	0	0	0	0	0.01577	0.0473	0	0	0	0.0068	0	0	0	0	0.01396	0	0	0	0	0	0	0	0	0	0	0	0	0
k__Bacteria|p__Firmicutes|c__Clostridia|o__Clostridiales|f__Lachnospiraceae|g__Lachnospiraceae_unclassified|s__Eubacterium_rectale	0	0	0	0	0	0.11756	0.01019	0	0	0.00945	0	0	0.27434	0.93064	1.17916	0.32399	1.93364	2.08147	1.28626	0.62084	0.85306	0	0.59168	0	0	0	0	0	0	0	0	0	0	0	0	0	0	0	0	0	0	0	0	0	0	0	0	0	0
k__Bacteria|p__Firmicutes|c__Clostridia|o__Clostridiales|f__Lachnospiraceae|g__Lachnospira|s__Lachnospira_pectinoschiza	0	0	0	0	0	0	0	0	0	0	0	0	0	0	0	0	0.09938	0	0	0	0	0	0	0	0.11096	0.14606	0.20635	0	0.14555	0.10301	0.31442	0.28425	0.23748	0.34508	0.28038	0.30945	0	0	0	0	0	0	0	0	0	0	0	0	0
k__Bacteria|p__Firmicutes|c__Clostridia|o__Clostridiales|f__Lachnospiraceae|g__Oribacterium|s__Oribacterium_sinus	0	0	0	0	0	0	0	0	0	0	0	0	0	0	0	1.15002	0	0	0	0	0	0	0	0	0	0	0	0	0	0	0	0	0	0	0	0	0	0	0	0	0	0	0	0	0	0	0	0	0
k__Bacteria|p__Firmicutes|c__Clostridia|o__Clostridiales|f__Lachnospiraceae|g__Roseburia|s__Roseburia_faecis	0	0	0	0	0	0	0	0	0	0	0	0	0	0	0	0.05658	0.33568	0.08918	0	0	0.00862	0	0	0	0.83115	0.35201	0.80698	1.39691	1.46667	1.80413	1.90402	1.8799	1.7609	2.24716	1.80399	1.99928	0	0	0	0	0	0	0	0	0	0	0	0	0
k__Bacteria|p__Firmicutes|c__Clostridia|o__Clostridiales|f__Lachnospiraceae|g__Roseburia|s__Roseburia_hominis	0	0	0	0	0	0	0	0	0	0	0	0	0	0	0	0	0	0	0	0	0	0	0	0	0	0.07511	0.02328	0	0	0	0.05483	0.03137	0.00349	0	0	0.02669	0	0	0	0	0	0	0	0	0	0	0	0	0
k__Bacteria|p__Firmicutes|c__Clostridia|o__Clostridiales|f__Lachnospiraceae|g__Roseburia|s__Roseburia_intestinalis	0	0	0	0	0	0	0	0	0	0	0	0	0	0	0	0	0	0	0	0	0	0	0	0	0	0.0002	0	0	0	0	0	0	0	0	0	0	0	0	0	0	0	0	0	0	0	0	0	0	0
k__Bacteria|p__Firmicutes|c__Clostridia|o__Clostridiales|f__Lachnospiraceae|g__Roseburia|s__Roseburia_inulinivorans	0	0	0	0	0	0.6823	0	0	0	0.00391	0	0	0	0	0	0	0.4024	0	0	0	0	0	0	0	0	0.02448	0.00582	0	0	0	0.36524	0.16455	0.22055	0.09572	0.11081	0.13233	0	0	0	0	0	0	0	0	0	0	0	0	0
k__Bacteria|p__Firmicutes|c__Clostridia|o__Clostridiales|f__Lachnospiraceae|g__Roseburia|s__Roseburia_sp_CAG_309	0	0	0	0	0	0.01302	0	0	0	0	0	0	0	0	0	0	0	0	0	0	0	0	0	0	0	0	0	0	0	0	0	0	0	0	0	0	0	0	0	0	0	0	0	0	0	0	0	0	0
k__Bacteria|p__Firmicutes|c__Clostridia|o__Clostridiales|f__Lachnospiraceae|g__Roseburia|s__Roseburia_sp_CAG_471	0	0	0	0	0	0	0	0	0	0	0	0	0	0	0	0	0	0	0	0	0	0	0	0	0	0.00113	0	0	0	0	0	0	0	0	0	0	0	0	0	0	0	0	0	0	0	0	0	0	0
k__Bacteria|p__Firmicutes|c__Clostridia|o__Clostridiales|f__Lachnospiraceae|g__Stomatobaculum|s__Stomatobaculum_longum	0	0	0	0	0	0	0	0	0	0	0	0	0	0	0	0.03175	0	0	0	0	0	0	0	0	0	0	0	0	0	0	0	0	0	0	0	0	0	0	0	0	0	0	0	0	0	0	0	0	0
k__Bacteria|p__Firmicutes|c__Clostridia|o__Clostridiales|f__Oscillospiraceae|g__Oscillibacter|s__Oscillibacter_sp_57_20	0	0	0	0	0	0.08019	0	0	0	0	0	0	0	0	0	0	0	0	0	0	0	0	0	0	0	0.20406	0.00445	0	0	0	0.02689	0.0022	0	0	0.00302	0.01589	0	0	0	0	0	0	0	0	0	0	0	0	0
k__Bacteria|p__Firmicutes|c__Clostridia|o__Clostridiales|f__Oscillospiraceae|g__Oscillibacter|s__Oscillibacter_sp_CAG_241	0	0	0	0	0	0	0	0	0	0	0	0	0.38283	0	0.30674	0.0982	0.44591	0	0	0	0.02332	0	0	0	0.2366	0.14667	0.31833	0	0.38615	0.57208	1.02295	0.7636	0.64911	0.5251	0.63028	0.93668	0	0	0	0	0	0	0	0	0	0	0	0	0
k__Bacteria|p__Firmicutes|c__Clostridia|o__Clostridiales|f__Ruminococcaceae|g__Agathobaculum|s__Agathobaculum_butyriciproducens	0	0	0	0.09351	0	0.05314	0.07753	0	0	0	0	0	0.04278	0	0	0.08087	0.79513	0.44169	0	0.30477	1.00977	0	0	0	0.17705	0.19326	0.25199	0	0.1078	0.14513	0.13722	0.10214	0.08085	0.13719	0.07158	0.15405	0	0	0	0	0	0	0	0	0	0	0	0	1.06785
k__Bacteria|p__Firmicutes|c__Clostridia|o__Clostridiales|f__Ruminococcaceae|g__Anaeromassilibacillus|s__Anaeromassilibacillus_sp_An250	0	0	0	0	0	0	0	0	0	0	0	0	0	0	0	0	0	0	0	0	0	0	0	0	0	0.00936	0	0	0	0	0	0	0	0	0	0	0	0	0	0	0	0	0	0	0	0	0	0	0
k__Bacteria|p__Firmicutes|c__Clostridia|o__Clostridiales|f__Ruminococcaceae|g__Faecalibacterium|s__Faecalibacterium_prausnitzii	6.57119	5.69505	4.59958	1.4255	2.89422	1.67914	1.62391	3.74966	0.66824	0.93337	0.53918	0.26558	7.37245	9.54412	7.81279	3.35762	7.28389	8.41659	8.18606	2.47366	6.55057	6.0167	6.24932	2.17253	3.38105	2.55267	3.31539	1.11233	0.94117	3.27619	3.38888	2.95412	2.79239	2.70869	2.82662	2.61607	3.09939	1.56721	1.79619	0	0	0.94574	0.65015	1.19643	0	0	0	0	19.2285
k__Bacteria|p__Firmicutes|c__Clostridia|o__Clostridiales|f__Ruminococcaceae|g__Flavonifractor|s__Flavonifractor_plautii	0.14954	0.07854	0	0.68236	0.92373	1.18427	1.40949	0.12103	0.7706	0.02432	0	0	0	0	0	0	0.05618	0	0	0	0	0	0	0	0.43592	1.39232	0.38044	0	0.29021	0.771	0.3231	0.39824	0.27279	0.24283	0.22629	0.27951	0	0	0	0	0	0	0	0	0	0	0	0	0
k__Bacteria|p__Firmicutes|c__Clostridia|o__Clostridiales|f__Ruminococcaceae|g__Gemmiger|s__Gemmiger_formicilis	0.19415	0.12139	0.10526	0.15699	0.14837	0.07807	0.00684	0	0	0.02668	0	0	0.41911	0	0	0.03318	0.45524	0	0	0	0	0	0	0	0.54642	0.20442	0.54002	0	0.72878	0.9919	0.34255	0.35374	0.22209	0.24467	0.29144	0.32505	0	0	0	0	0	0	0	0	0	0	0	0	0.41428
k__Bacteria|p__Firmicutes|c__Clostridia|o__Clostridiales|f__Ruminococcaceae|g__Ruminococcaceae_unclassified|s__Clostridium_leptum	0	0	0	0	0	0	0	0	0	0	0	0	0	0	0	0	0	0	0	0	0	0	0	0	0	0.02803	0.00524	0	0	0	0.00277	0	0	0.02193	0	0.01206	0	0	0	0	0	0	0	0	0	0	0	0	0
k__Bacteria|p__Firmicutes|c__Clostridia|o__Clostridiales|f__Ruminococcaceae|g__Ruminococcaceae_unclassified|s__Eubacterium_siraeum	0	0	0	0	0	0	0	0	0	0	0	0	0	0	0	0	0	0	0	0	0	0	0	0	0.09049	0.13794	0.12974	0	0	0	0.45181	0.44614	0.50262	0.59511	0.51679	0.77635	0	0	0	0	0	0	0	0	0	0	0	0	0
k__Bacteria|p__Firmicutes|c__Clostridia|o__Clostridiales|f__Ruminococcaceae|g__Ruminococcaceae_unclassified|s__Ruminococcaceae_bacterium_D16	0	0	0	0	0	0	0	0	0	0	0	0	0	0	0	0	0.0244	0	0	0	0	0	0	0	0	0	0	0	0	0	0	0	0	0	0	0	0	0	0	0	0	0	0	0	0	0	0	0	0
k__Bacteria|p__Firmicutes|c__Clostridia|o__Clostridiales|f__Ruminococcaceae|g__Ruminococcus|s__Ruminococcus_bicirculans	0.12398	0.37835	0.01198	0.13826	0.24586	1.18016	0.019	0	0	0.00723	0	0	0	0	0	0	0.03177	0	0	0	0	0	0	0	0	0	0	0	0	0	0	0	0	0	0	0	0	0	0	0	0	0	0	0	0	0	0	0	0
k__Bacteria|p__Firmicutes|c__Clostridia|o__Clostridiales|f__Ruminococcaceae|g__Ruminococcus|s__Ruminococcus_bromii	0	0	0	0	0	0	0	0	0	0	0	0	0.9528	0	0.55696	0.27715	0.89587	0.15709	0	0	0.57386	0	0	0.12941	4.67684	2.22367	3.42795	4.88912	4.55653	4.92362	6.08351	7.13616	6.3567	12.3058	9.52707	11.2935	0	0	0	0	0	0	0	0	0	0	0	0	6.45978
k__Bacteria|p__Firmicutes|c__Clostridia|o__Clostridiales|f__Ruminococcaceae|g__Ruminococcus|s__Ruminococcus_callidus	0	0	0	0	0	0.06526	0	0	0	0	0	0	0	0	0	0	0	0	0	0	0	0	0	0	0	0	0	0	0	0	0	0	0	0	0	0	0	0	0	0	0	0	0	0	0	0	0	0	0
k__Bacteria|p__Firmicutes|c__Clostridia|o__Clostridiales|f__Ruminococcaceae|g__Ruminococcus|s__Ruminococcus_lactaris	0	0	0	0	0	0	0	0	0	0	0	0	0	0	0	0	0.75385	0.05635	0	0.37272	0.92031	0	0.2826	0	0	0	0	0	0	0	0	0	0	0	0	0	0	0	0	0	0	0	0	0	0	0	0	0	1.04286
k__Bacteria|p__Firmicutes|c__Clostridia|o__Clostridiales|f__Ruminococcaceae|g__Ruminococcus|s__Ruminococcus_obeum_CAG_39	0	0	0	0	0	0	0	0	0	0	0	0	0.09408	0	0	0	0	0	0	0	0	0	0	0	0	0	0	0	0	0	0	0	0	0	0	0	0	0	0.12457	0	0	0	0	0	0	0	0	0	0
k__Bacteria|p__Firmicutes|c__Clostridia|o__Clostridiales|f__Ruminococcaceae|g__Ruthenibacterium|s__Ruthenibacterium_lactatiformans	0.21279	0.12361	0	0.1986	0.43596	0.25697	0.11125	0	0	0.04376	0	0	0	0	0	0	0.00647	0	0	0	0	0	0	0	0.07813	0.13699	0.09414	0	0	0.09286	0.16619	0.16788	0.12026	0.18947	0.28425	0.20833	0	0	0	0	0	0	0	0	0	0	0	0	0
k__Bacteria|p__Firmicutes|c__Erysipelotrichia|o__Erysipelotrichales|f__Erysipelotrichaceae|g__Candidatus_Stoquefichus|s__Candidatus_Stoquefichus_sp_KLE1796	0	0	0	0	0	0	0	0	0	0	0	0	0	0	0	0	0	0	0	0	0	0	0	0	0	0.00265	0	0	0	0	0	0	0	0	0	0	0	0	0	0	0	0	0	0	0	0	0	0	0
k__Bacteria|p__Firmicutes|c__Erysipelotrichia|o__Erysipelotrichales|f__Erysipelotrichaceae|g__Catenibacterium|s__Catenibacterium_mitsuokai	0	0	0	0	0	0	0	0	0	0	0	0	0	0	0	0	0	0	0	0	0	0	0	0	0	0	0	0	0	0	0	0	0	0	0	0	0	0	0	0	0	0	0	0	0	0	0	0	0.27257
k__Bacteria|p__Firmicutes|c__Erysipelotrichia|o__Erysipelotrichales|f__Erysipelotrichaceae|g__Erysipelatoclostridium|s__Clostridium_spiroforme	0	0	0	0	0	0	0.06099	0	0	0	0	0	0	0	0	0	0.09621	0	0	0	0.05579	0	0	0	0	0.00917	0	0	0	0	0	0	0	0.00911	0.00266	0.02155	0	0	0	0	0	0	0	0	0	0	0	0	0
k__Bacteria|p__Firmicutes|c__Erysipelotrichia|o__Erysipelotrichales|f__Erysipelotrichaceae|g__Holdemania|s__Holdemania_filiformis	0	0	0	0	0	0	0	0	0	0	0	0	0	0	0	0	0	0	0	0	0	0	0	0	0.07371	0.02393	0.08227	0	0	0	0.02701	0	0	0.00098	0.0298	0.04215	0	0	0	0	0	0	0	0	0	0	0	0	0
k__Bacteria|p__Firmicutes|c__Firmicutes_unclassified|o__Firmicutes_unclassified|f__Firmicutes_unclassified|g__Firmicutes_unclassified|s__Firmicutes_bacterium_CAG_110	0	0	0	0	0	0	0	0	0	0	0	0	0	0	0	0	0	0	0	0	0	0	0	0	0	0.00774	0.02148	0	0	0	0.03042	0.02082	0.00681	0.02956	0	0.03535	0	0	0	0	0	0	0	0	0	0	0	0	0
k__Bacteria|p__Firmicutes|c__Firmicutes_unclassified|o__Firmicutes_unclassified|f__Firmicutes_unclassified|g__Firmicutes_unclassified|s__Firmicutes_bacterium_CAG_145	0	0	0	0	0	0	0	0	0	0	0	0	0	0	0	0	0.01489	0	0	0	0	0	0	0	0.02054	0.03106	0.02812	0	0	0	0.06738	0.04456	0.03154	0.10391	0.02351	0.09787	0	0	0	0	0	0	0	0	0	0	0	0	0
k__Bacteria|p__Firmicutes|c__Firmicutes_unclassified|o__Firmicutes_unclassified|f__Firmicutes_unclassified|g__Firmicutes_unclassified|s__Firmicutes_bacterium_CAG_83	1.4979	2.23661	1.7816	1.25846	1.07433	1.48307	0.18223	0	0	0.11135	0.05806	0	0.7384	0	1.1661	0.32378	2.11073	0.74916	0	0	0.76962	0	0	0	0.39987	0.48237	0.37095	0	0.07106	0	0.20164	0.16174	0.14201	0.1519	0.13326	0.23512	0	0	0	0	0	0	0	0	0	0	0	0	0
k__Bacteria|p__Firmicutes|c__Negativicutes|o__Acidaminococcales|f__Acidaminococcaceae|g__Acidaminococcus|s__Acidaminococcus_intestini	0.31377	0.0648	0.30329	0.26223	0.31702	0.3408	0.03366	0	0	0.03783	0	0	1.25735	0	0.55706	0.32642	0.94451	0.55188	0	0.35823	0.32005	0	0	0	0	0	0	0	0	0	0	0	0	0	0	0	0	0	0	0	0	0	0	0	0	0	0	0	0
k__Bacteria|p__Firmicutes|c__Negativicutes|o__Acidaminococcales|f__Acidaminococcaceae|g__Phascolarctobacterium|s__Phascolarctobacterium_faecium	0	0	0	0	0	0	0	0	0	0	0	0	0	0	0	0	0.20874	0.12821	0	0	0	0	0	0	0	0	0	0	0	0	0	0	0	0	0	0	0	0	0	0	0	0	0	0	0	0	0	0	0
k__Bacteria|p__Firmicutes|c__Negativicutes|o__Selenomonadales|f__Selenomonadaceae|g__Megamonas|s__Megamonas_funiformis	0	0	0	0	0	0	0	0	0	0	0	0	1.58594	0.31863	0	0.18995	0.07497	0.89484	0	0	1.20723	0	0.19672	0	0	0	0	0	0	0	0	0	0	0	0	0	0	0	0	0	0	0	0	0	0	0	0	0	0
k__Bacteria|p__Firmicutes|c__Negativicutes|o__Selenomonadales|f__Selenomonadaceae|g__Megamonas|s__Megamonas_funiformis_CAG_377	0	0	0	0	0	0	0	0	0	0	0	0	0	0	0.25015	0.05846	0.06549	0	0	1.45921	0	0	0.15757	0.53106	0	0	0	0	0	0	0	0	0	0	0	0	0	0	0	0	0	0	0	0	0	0	0	0	0
k__Bacteria|p__Firmicutes|c__Negativicutes|o__Selenomonadales|f__Selenomonadaceae|g__Megamonas|s__Megamonas_hypermegale	0	0	0	0	0	0	0	0	0	0	0	0	0	0	0	0	0.25042	0.32861	0	2.48456	0	0	0.97475	0	0	0	0	0	0	0	0	0	0	0	0	0	0	0	0	0	0	0	0	0	0	0	0	0	0
k__Bacteria|p__Firmicutes|c__Negativicutes|o__Veillonellales|f__Veillonellaceae|g__Allisonella|s__Allisonella_histaminiformans	0	0	0	0	0	0	0	0	0	0	0	0	0	0	0	0	0.00558	0	0	0	0	0	0	0	0	0	0	0	0	0	0	0	0	0	0	0	0	0	0	0	0	0	0	0	0	0	0	0	0
k__Bacteria|p__Firmicutes|c__Negativicutes|o__Veillonellales|f__Veillonellaceae|g__Dialister|s__Dialister_invisus	0	0.01276	0.03842	0.09108	0	0.12878	0	0	0	0.01101	0	0	0.31133	0.16512	0.22466	0.07589	0.27631	0.44301	0	0.19585	0.07621	0	0	0	0.98209	2.00285	0.62616	1.07452	0.42432	0.38563	0.20356	0.20706	0.20639	0.22254	0.25353	0.23624	0	0	0	0	0	0	0	0	0	0	0	0	0
k__Bacteria|p__Firmicutes|c__Negativicutes|o__Veillonellales|f__Veillonellaceae|g__Dialister|s__Dialister_sp_CAG_357	0.71401	0.71055	0.53211	0.84095	0.7769	0.87225	0.12806	0.033	0	0.13905	0	0	0	0	0	0	0	0	0	0	0	0	0	0	0	0	0	0	0	0	0	0	0	0	0	0	0	0	0	0	0	0	0	0	0	0	0	0	0.51
k__Bacteria|p__Firmicutes|c__Negativicutes|o__Veillonellales|f__Veillonellaceae|g__Megasphaera|s__Megasphaera_micronuciformis	0	0	0	0	0	0	0	0	0	0	0	0	0	0	0	0	0	0	0	0	0	0	0	0	0	0	0	0	0	0	0	0	0	0	0	0	0	0	0	0	0	0	0	0	0	0	0	0	0
k__Bacteria|p__Firmicutes|c__Negativicutes|o__Veillonellales|f__Veillonellaceae|g__Megasphaera|s__Megasphaera_sp_DISK_18	0	0	0	0	0	0	0	0	0	0	0	0	0	0	0	0	0.19953	0	0	0	0	0	0	0	0.32974	0.42737	0.22694	0	0.19707	0.15694	0.18975	0.19736	0.20827	0.28363	0.32016	0.26227	0	0	0	0	0	0	0	0	0	0	0	0	0
k__Bacteria|p__Firmicutes|c__Negativicutes|o__Veillonellales|f__Veillonellaceae|g__Megasphaera|s__Megasphaera_sp_MJR8396C	0	0	0	0	0	0	0	0	0	0	0	0	0	0	0	0	0.01	0	0	0	0	0	0	0	0	0.00067	0	0	0	0	0	0	0	0	0	0.00064	0	0	0	0	0	0	0	0	0	0	0	0	0
k__Bacteria|p__Firmicutes|c__Negativicutes|o__Veillonellales|f__Veillonellaceae|g__Veillonella|s__Veillonella_atypica	0	0	0	0	0	0	0	0	0	0	0	0	0	0	0	0	0	0	0	0	0	0	0	0	0	0	0	0	0	0	0	0	0	0	0	0	0.19772	0.0549	0.22649	0	0	0	0	0	0	0	0	0	0
k__Bacteria|p__Firmicutes|c__Negativicutes|o__Veillonellales|f__Veillonellaceae|g__Veillonella|s__Veillonella_dispar	0	0	0	0	0.06409	0	0	0	0	0	0	0	0	0	0	3.63644	0.03016	0	0	0	0	0	0	0	0	0	0	0	0	0	0	0	0	0	0	0	0	0.17614	0	0	0	0	0	0	0	0	0	0	0
k__Bacteria|p__Firmicutes|c__Negativicutes|o__Veillonellales|f__Veillonellaceae|g__Veillonella|s__Veillonella_infantium	0	0	0	0	0.01588	0	0	0	0	0	0	0	0	0	0	1.86274	0.00591	0	0	0	0	0	0	0	0	0	0	0	0	0	0	0	0	0	0	0	0	0	0	0	0	0	0	0	0	0	0	0	0
k__Bacteria|p__Firmicutes|c__Negativicutes|o__Veillonellales|f__Veillonellaceae|g__Veillonella|s__Veillonella_parvula	0	0	0	0.01003	0	0	0	0	0	0	0	0	0	0	0	0.079	0	0	0	0	0	0	0	0	0	0	0	0	0	0	0	0	0	0	0	0	0	0	0	0	0	0	0	0	0	0	0	0	0
k__Bacteria|p__Firmicutes|c__Negativicutes|o__Veillonellales|f__Veillonellaceae|g__Veillonella|s__Veillonella_sp_T11011_6	0	0	0	0	0	0	0	0	0	0	0	0	0	0	0	0.45415	0	0	0	0	0	0	0	0	0	0	0	0	0	0	0	0	0	0	0	0	0	0	0	0	0	0	0	0	0	0	0	0	0
k__Bacteria|p__Firmicutes|c__Tissierellia|o__Tissierellales|f__Peptoniphilaceae|g__Parvimonas|s__Parvimonas_micra	0	0.03072	0	0.03115	0	0	0	0	0	0	0	0	0	0	0	0	0	0	0	0	0	0	0	0	0.01297	0.00274	0.046	0	0	0	0	0	0	0	0	0	0	0	0	0	0	0	0	0	0	0	0	0	0
k__Bacteria|p__Fusobacteria|c__Fusobacteriia|o__Fusobacteriales|f__Fusobacteriaceae|g__Fusobacterium|s__Fusobacterium_nucleatum	0	0	0	0.02548	0	0	0	0	0	0	0	0	0	0	0	0	0	0	0	0	0	0	0	0	0	0	0.00715	0	0	0	0	0	0	0	0	0	0	0	0	0	0	0	0	0	0	0	0	0	0
k__Bacteria|p__Fusobacteria|c__Fusobacteriia|o__Fusobacteriales|f__Fusobacteriaceae|g__Fusobacterium|s__Fusobacterium_periodonticum	0	0	0	0	0	0	0	0	0	0	0	0	0	0	0	25.4675	0.03134	0	0	0	0	0	0	0	0	0	0	0	0	0	0	0	0	0	0	0	0	0	0	0	0	0	0	0	0	0	0	0	0
k__Bacteria|p__Fusobacteria|c__Fusobacteriia|o__Fusobacteriales|f__Leptotrichiaceae|g__Leptotrichia|s__Leptotrichia_sp_oral_taxon_215	0	0	0	0	0	0	0	0	0	0	0	0	0	0	0	2.42548	0	0	0	0	0	0	0	0	0	0	0	0	0	0	0	0	0	0	0	0	0	0	0	0	0	0	0	0	0	0	0	0	0
k__Bacteria|p__Proteobacteria|c__Alphaproteobacteria|o__Caulobacterales|f__Caulobacteraceae|g__Brevundimonas|s__Brevundimonas_diminuta	0	0	0	0	0	0	0	0	0	0	0	0	0	0	0	0	0	0	0	0	0	0	0	0	0	0	0	0	0	0	0	0	0	0	0	0	0	0	0	0	0	0	0	0.0885	0	2.69805	0	0	0
k__Bacteria|p__Proteobacteria|c__Alphaproteobacteria|o__Rhodospirillales|f__Rhodospirillales_unclassified|g__Enhydrobacter|s__Enhydrobacter_aerosaccus	0	0	0	0	0	0	0	0	0	0	0	0	0	0	0	0	0	0	0	0	0	0	0	0	0	0	0	0	0	0	0	0	0	0	0	0	0	0	0	0	0	0	0	0	0	11.1742	0	0	0
k__Bacteria|p__Proteobacteria|c__Alphaproteobacteria|o__Sphingomonadales|f__Sphingomonadaceae|g__Sphingobium|s__Sphingobium_yanoikuyae	0	0	0	0	0	0	0	0	0	0	0	0	0	0	0	0	0	0	0	0	0	0	0	0	0	0	0	0	0	0	0	0	0	0.02256	0	0	0	0	0	0	0	0.53466	1.75006	5.51754	0	29.5826	0	24.7918	0.60335
k__Bacteria|p__Proteobacteria|c__Betaproteobacteria|o__Burkholderiales|f__Sutterellaceae|g__Parasutterella|s__Parasutterella_excrementihominis	3.02836	3.39388	3.83268	1.63006	1.36396	1.92482	0.92975	2.79781	0.42024	0.50348	0.08234	0	0	0	0	0	0	0	0	0	0	0	0	0	0	0	0	0	0	0	0	0	0	0	0	0	0	0	0	0	0	0	0	0	0	0	0	0	0
k__Bacteria|p__Proteobacteria|c__Betaproteobacteria|o__Burkholderiales|f__Sutterellaceae|g__Sutterella|s__Sutterella_parvirubra	0	0	0	0	0	0	0	0	0	0	0	0	0.17935	0	0	0	0.1672	0	0	0	0.5662	0	0.16813	0	0	0	0	0	0	0	0	0	0	0	0	0	0	0	0	0	0	0	0	0	0	0	0	0	0.2167
k__Bacteria|p__Proteobacteria|c__Betaproteobacteria|o__Burkholderiales|f__Sutterellaceae|g__Turicimonas|s__Turicimonas_muris	0	0	0	0.0694	0	0	0	0	0	0.00518	0	0	0	0	0	0	0	0	0	0	0	0	0	0	0	0	0	0	0	0	0	0	0	0	0	0	0	0	0	0	0	0	0	0	0	0	0	0	0
k__Bacteria|p__Proteobacteria|c__Betaproteobacteria|o__Neisseriales|f__Neisseriaceae|g__Neisseria|s__Neisseria_flavescens	0	0	0.21303	0.39935	0	0	0	0	0	0.15587	0	0	0.25707	0	0	10.5002	0.52175	0	0	0	0	0	0	0	0	0	0	0	0	0	0	0	0	0	0	0	0	0	0	0	0	0	0	0	0	0	0	0	0
k__Bacteria|p__Proteobacteria|c__Betaproteobacteria|o__Neisseriales|f__Neisseriaceae|g__Neisseria|s__Neisseria_subflava	0	0	0	0	0	0	0	0	0	0	0	0	0.1661	0	0	0.50873	0.40733	0	0	0	0	0	0	0	0	0	0	0	0	0	0	0	0	0	0	0	0	0	0	0	0	0	0	0	0	0	0	0	0
k__Bacteria|p__Proteobacteria|c__Deltaproteobacteria|o__Desulfovibrionales|f__Desulfovibrionaceae|g__Bilophila|s__Bilophila_wadsworthia	0.3289	0.41181	0.25276	0.36139	0.37457	0.43985	0.08381	0	0	0.0921	0	0	0.86195	0	0	0.20197	1.09745	0	0	0.29357	0.24839	0	0	0	0.36162	0.85121	0.26712	0	0.05017	0.08181	0.194	0.15653	0.14782	0.19521	0.22619	0.23201	0	0	0	0	0	0	0	0	0	0	0	0	0
k__Bacteria|p__Proteobacteria|c__Epsilonproteobacteria|o__Campylobacterales|f__Campylobacteraceae|g__Campylobacter|s__Campylobacter_concisus	0	0	0	0	0.1128	0	0	0	0	0	0	0	0	0	0	0.91467	0	0	0	0	0	0	0	0	0	0	0	0	0	0	0	0	0	0	0	0	0	0	0	0	0	0	0	0	0	0	0	0	0
k__Bacteria|p__Proteobacteria|c__Gammaproteobacteria|o__Enterobacterales|f__Enterobacteriaceae|g__Escherichia|s__Escherichia_coli	3.51316	6.38409	6.02913	5.27404	6.32743	2.46944	52.8007	55.571	74.8497	89.3957	94.6613	95.3536	0	0	0	0	0	0	0	0	0.30539	0	0	0	0.1254	0.05019	0.25529	0	0	0.16027	0.27084	0.24634	0.12678	0.34858	0.26964	0.30872	0	0	0	0	0	0	0	0	0	0	0	0	0.75144
k__Bacteria|p__Proteobacteria|c__Gammaproteobacteria|o__Pasteurellales|f__Pasteurellaceae|g__Aggregatibacter|s__Aggregatibacter_segnis	0	0	0	0	0	0	0	0	0	0	0	0	0	0	0	0	0	0	0	0	0	0	0	0	0.07429	0.04138	0.33916	0	0	0	0	0	0	0	0	0	0	0	0	0	0	0	0	0	0	0	0	0	0
k__Bacteria|p__Proteobacteria|c__Gammaproteobacteria|o__Pasteurellales|f__Pasteurellaceae|g__Haemophilus|s__Haemophilus_haemolyticus	0	0	0.08846	0	0	0	0	0	0	0.00588	0	0	0	0	0	0	0.09003	0	0	0	0	0	0	0	0.02744	0.00759	0.14506	0	0	0	0	0	0	0	0	0	0	0	0	0	0	0	0	0	0	0	0	0	0
k__Bacteria|p__Proteobacteria|c__Gammaproteobacteria|o__Pasteurellales|f__Pasteurellaceae|g__Haemophilus|s__Haemophilus_parahaemolyticus	0	0	0.07346	0.01129	0	0	0	0	0	0	0	0	0	0	0	0	0	0	0	0	0	0	0	0	0	0	0	0	0	0	0	0	0	0	0	0	0	0	0	0	0	0	0	0	0	0	0	0	0
k__Bacteria|p__Proteobacteria|c__Gammaproteobacteria|o__Pasteurellales|f__Pasteurellaceae|g__Haemophilus|s__Haemophilus_parainfluenzae	0.21456	1.12073	2.4628	1.62545	1.22693	0.09372	0.09727	0	0	0.09072	0.07643	0	0.44525	0	0	6.01461	0.29983	1.52805	0	0	0	0	0	0	0	0	0	0	0	0	0	0	0	0	0	0	0	0	0	0	0	0	0	0	0	0	0	0	0.38294
k__Bacteria|p__Proteobacteria|c__Gammaproteobacteria|o__Pasteurellales|f__Pasteurellaceae|g__Haemophilus|s__Haemophilus_paraphrohaemolyticus	0	0	0	0	0	0	0	0	0	0	0	0	0	0	0	0	0.09515	0	0	0	0	0	0	0	0	0	0	0	0	0	0	0	0	0	0	0	0	0	0	0	0	0	0	0	0	0	0	0	0
k__Bacteria|p__Proteobacteria|c__Gammaproteobacteria|o__Pasteurellales|f__Pasteurellaceae|g__Haemophilus|s__Haemophilus_sp_HMSC71H05	0.10842	0.62455	1.15143	1.10349	0.93319	0.29018	0.06022	0	0	0.03197	0.21733	0	0	0	0	0	0	0	0	0	0	0	0	0	0	0	0.00184	0	0	0	0	0	0	0	0	0	0	0	0	0	0	0	0	0	0	0	0	0	0
k__Bacteria|p__Proteobacteria|c__Gammaproteobacteria|o__Pseudomonadales|f__Moraxellaceae|g__Acinetobacter|s__Acinetobacter_junii	0	0	0	0	0	0	0	0	0	0	0	0	0	0	0	0	0	0	0	0	0	0	0	0	0	0	0	0	0	0	0	0	0	0	0	0	0	0	0.48567	0	0	0	0	0	0	0	0	0	0
k__Bacteria|p__Proteobacteria|c__Gammaproteobacteria|o__Pseudomonadales|f__Moraxellaceae|g__Moraxella|s__Moraxella_osloensis	0	0	0	0	0.00538	0	0	0	0	0	0	0	0	0	0	0	0	0	0	0	0	0	0	0	0	0	0	0	0	0	0	0	0	0	0	0	0	0	0	0	0	0	0	0	0	27.3557	0	0	0
k__Bacteria|p__Proteobacteria|c__Gammaproteobacteria|o__Pseudomonadales|f__Pseudomonadaceae|g__Pseudomonas|s__Pseudomonas_fluorescens_group	0	0	0	0	0	0	0	0	0	0	0	0	0	0	0	0	0	0	0	0	0	0	0	0	0	0	0	0	0	0	0	0	0	0	0	0	0	0	0	0	0	0	0.23841	0.8094	0	0	0	5.08279	0
k__Bacteria|p__Proteobacteria|c__Gammaproteobacteria|o__Pseudomonadales|f__Pseudomonadaceae|g__Pseudomonas|s__Pseudomonas_kunmingensis	0	0	0	0	0	0	0	0	0	0	0	0	0	0	0	0	0	0	0	0	0	0	0	0	0	0	0	0	0	0	0	0	0	0	0	0	0	0	0	0	0	0	0.95971	6.30364	0	0	0	32.5742	0.5107
k__Bacteria|p__Proteobacteria|c__Gammaproteobacteria|o__Xanthomonadales|f__Xanthomonadaceae|g__Stenotrophomonas|s__Stenotrophomonas_sp_BIIR7	0	0	0	0	0	0	0	0	0	0	0	0	0	0	0	0	0	0	0	0	0	0	0	0	0	0	0	0	0	0	0	0	0	0	0	0	0	0	0	0	0	0	0	0	0	0	0	0	0
k__Bacteria|p__Proteobacteria|c__Proteobacteria_unclassified|o__Proteobacteria_unclassified|f__Proteobacteria_unclassified|g__Proteobacteria_unclassified|s__Proteobacteria_bacterium_CAG_139	0	0.18736	0.07464	0.03682	0	0.0342	0.03666	0	0	0.02418	0	0	0	0	0	0	0	0	0	0	0	0	0	0	0	0	0	0	0	0	0	0	0	0	0	0	0	0	0	0	0	0	0	0	0	0	0	0	0
k__Bacteria|p__Verrucomicrobia|c__Verrucomicrobiae|o__Verrucomicrobiales|f__Akkermansiaceae|g__Akkermansia|s__Akkermansia_muciniphila	0	0.01792	0	0	0	0	0	0	0	0	0	0	0	0	0	0	0.02066	0	0	0	0	0	0	0	3.63372	1.74491	4.43216	8.00143	10.9565	10.7891	7.17047	7.17618	4.67381	5.97203	6.13518	7.89277	0	0	0	0	0	0	0	0	0	0	0	0	0
Patient	CT7	CT7	CT7	CT7	CT7	CT7	CT7	CT7	CT7	CT7	CT7	CT7	CT8	CT8	CT8	CT8	CT8	CT8	CT8	CT8	CT8	CT8	CT8	CT8	CT12	CT12	CT12	CT12	CT12	CT12	CT12	CT12	CT12	CT12	CT12	CT12	CT13	CT13	CT13	CT13	CT13	CT13	CT13	CT13	CT13	CT13	CT13	CT13	CT14
Location	TI	TI	TI	AC	AC	AC	DC	DC	DC	R	R	R	TI	TI	TI	AC	AC	AC	DC	DC	DC	R	R	R	TI	TI	TI	AC	AC	AC	DC	DC	DC	R	R	R	TI	TI	TI	AC	AC	AC	DC	DC	DC	R	R	R	TI
Rep	1	2	3	1	2	3	1	2	3	1	2	3	1	2	3	1	2	3	1	2	3	1	2	3	1	2	3	1	2	3	1	2	3	1	2	3	1	2	3	1	2	3	1	2	3	1	2	3	1
[truncated: 9 more columns]

## Sheet: Table_S8
contigs_db	CT18_C	CT18_MEM
Total Length	3359968	377714748
Num Contigs	1728	69054
Num Contigs > 100 kb	0	393
Num Contigs > 50 kb	0	1114
Num Contigs > 20 kb	1	3268
Num Contigs > 10 kb	14	6501
Num Contigs > 5 kb	60	12332
Num Contigs > 2.5 kb	299	24612
Longest Contig	22519	833040
Shortest Contig	1000	1000
Num Genes (prodigal)	6997	393492
L50	473	3558
L75	997	15598
L90	1411	39014
N50	1993	18501
N75	1335	3913
N90	1115	1634
Archaea_76	1	3850
Bacteria_71	1	7391
Protista_83	0	432
Ribosomal_RNA_12S	0	0
Ribosomal_RNA_16S	0	45
Ribosomal_RNA_18S	1	0
Ribosomal_RNA_23S	0	90
Ribosomal_RNA_28S	1	0
Ribosomal_RNA_5S	0	0
Transfer_RNAs	1	5394
archaea (Archaea_76)	0	0
eukarya (Protista_83)	0	0
bacteria (Bacteria_71)	0	93

## Sheet: Table_S9
bins	total_length	num_contigs	N50	GC_content	percent_completion	percent_redundancy	GTDB_reference_accession	GTDB_genome_length	bin_length_ratio	Ribosomal_RNA_16S	Ribosomal_RNA_23S	Ribosomal_RNA_5S	Transfer_RNAs
DC1_Bin_13_9	2332332	372	8356	38.0546	76.0563	4.22535	GCF_009680455.1	3023216	0.771474	0	0	0	35
DC1_Bin_14	3406667	2204	1504	62.0702	80.2817	76.0563	GCF_001025155.1	2021974	1.68482	1	0	0	35
DC1_Bin_17_28	2130286	234	13327	53.4095	92.9577	2.8169	GCA_008681155.1	3163092	0.673482	0	0	0	36
DC1_Bin_19_2	2311149	486	5381	44.0644	52.1127	4.22535	GCF_003473545.1	3795623	0.608898	0	1	0	31
DC1_Bin_1_1	1450479	622	2546	29.3548	59.1549	1.40845	GCF_003024685.1	2793685	0.519199	0	0	0	11
DC1_Bin_22_Done	4757618	761	10430	50.8453	73.2394	2.8169	GCF_003697165.2	5034834	0.94494	0	1	0	57
DC1_Bin_3_1	1461407	745	2104	58.8481	74.6479	2.8169	GCA_900543475.1	2309147	0.632877	0	0	0	15
DC1_Bin_5_17	1866290	30	130062	45.0324	98.5915	1.40845	GCF_000160055.1	1895960	0.984351	0	0	0	49
DC1_Bin_5_4	2592656	70	59718	42.1302	97.1831	4.22535	GCF_000153925.1	2741706	0.945636	0	0	0	41
DC1_Bin_5_Done4	5507752	75	125933	42.3835	59.1549	5.6338	GCF_900106755.1	5959374	0.924217	0	0	0	59
DC1_Bin_7_2	2799842	268	15151	41.1406	53.5211	4.22535	GCF_000174195.1	4048462	0.691582	0	0	0	50
DC2_Bin_13_2	3265224	1016	3943	57.5367	80.2817	4.22535	GCF_000420465.1	3391683	0.962715	0	0	0	32
DC2_Bin_15_6	4321279	71	101498	43.308	98.5915	1.40845	GCF_000190535.1	4392288	0.983833	0	0	0	51
DC2_Bin_4_17	2822709	80	49827	58.6481	69.0141	1.40845	GCF_900167555.1	3241569	0.870785	0	0	0	54
DC2_Bin_4_4	2102045	196	13933	59.6038	92.9577	0	GCA_003522945.1	1840085	1.14236	0	0	0	28
DC2_Bin_4_5	3215217	323	10959	59.2572	85.9155	1.40845	GCF_000701705.1	4630442	0.694365	0	0	0	45
DC2_Bin_4_6	2359738	61	71956	60.2289	95.7746	0	GCA_003525905.1	2194606	1.07524	0	0	0	41
DC2_Bin_6_3	2381621	680	4515	45.3496	90.1408	1.40845	GCA_000154325.1	2697034	0.883052	0	0	0	31
DC3_Bin_0_1	4808922	172	47184	42.096	98.5915	4.22535	GCF_000012825.1	5163189	0.931386	0	0	0	62
DC3_Bin_0_10	1736723	61	40642	37.7903	57.7465	1.40845	GCF_900209925.1	3515670	0.493995	0	0	0	24
DC3_Bin_0_23	2044353	38	86882	44.3049	83.0986	2.8169	GCF_001487165.1	3717343	0.54995	0	0	0	33
DC3_Bin_0_39	2132334	22	137260	46.665	63.3803	5.6338	GCF_000154205.1	4719097	0.451852	0	0	0	25
DC3_Bin_0_Done9	2772724	33	121793	50.0076	98.5915	1.40845	GCF_000455225.1	2737487	1.01287	1	0	0	60
DC3_Bin_10_1	2431695	697	4399	48.657	92.9577	5.6338	GCA_900544965.1	1939305	1.2539	0	0	0	45
DC3_Bin_12	2165249	1103	2092	45.5814	73.2394	5.6338	NA	NA	NA	0	0	0	20
DC3_Bin_16_3	1733736	768	2543	66.4978	83.0986	5.6338	GCA_900550525.1	1926165	0.900097	0	0	0	19
DC3_Bin_18_19	2099052	197	20287	36.9303	71.831	4.22535	GCA_900112995.1	2817405	0.74503	0	0	0	13
DC3_Bin_1_2	2195918	366	7662	56.3956	78.8732	5.6338	GCF_003324125.1	3508961	0.625803	0	0	0	35
DC3_Bin_20_1	2120146	466	6132	57.3489	92.9577	0	GCA_900546075.1	2195070	0.965867	0	0	0	35
DC3_Bin_20_10	1944591	465	5233	58.8726	60.5634	2.8169	GCF_000949455.1	4111078	0.473012	0	0	0	22
DC3_Bin_21_11	2255782	38	80350	58.3178	91.5493	0	GCF_003425665.1	2494407	0.904336	0	0	0	47
DC3_Bin_21_14	3020532	41	122352	51.6172	95.7746	2.8169	GCA_900544375.1	2461597	1.22706	0	0	0	45
DC3_Bin_21_15	3556872	34	134367	58.5608	94.3662	2.8169	GCF_000374505.1	3865648	0.920123	0	0	0	47
DC3_Bin_21_23	2045264	99	31424	56.9347	94.3662	0	GCF_900128485.1	2353688	0.868961	0	1	0	47
DC3_Bin_21_26	3020700	29	166793	58.0653	98.5915	0	GCF_018847375.1	3049079	0.990693	0	0	0	47
DC3_Bin_24_9	1345513	766	1836	63.7146	54.9296	2.8169	GCF_000024265.1	3632260	0.370434	0	0	0	15
DC3_Bin_3_3	1874309	96	36042	59.3786	97.1831	1.40845	GCF_001025155.1	2021974	0.92697	1	1	0	52
DC3_Bin_9_1	2090615	510	4866	49.6063	53.5211	5.6338	GCF_003024715.1	3277016	0.637963	0	0	0	40
DC3_Bin_9_2	2863676	727	5029	49.9497	80.2817	5.6338	NA	NA	NA	0	0	0	27
DC3_Bin_9_3	1969251	467	5248	48.902	76.0563	5.6338	GCF_015557635.1	3595263	0.547735	0	0	0	23
TI1_Bin_10_7	5431884	665	11242	43.2666	53.5211	5.6338	GCF_000158035.1	6870144	0.790651	0	0	0	36
TI1_Bin_13_11	1870387	65	39961	57.4424	50.7042	2.8169	GCF_010509575.1	3102523	0.60286	0	0	0	52
TI1_Bin_4_6	790278	486	1641	60.1091	52.1127	2.8169	GCA_003522945.1	1840085	0.429479	0	0	0	5
TI1_Bin_6_4	1130272	764	1428	30.8831	50.7042	1.40845	GCF_003024685.1	2793685	0.404581	0	0	0	2
TI1_Bin_9_4	2850870	59	78346	40.8572	90.1408	0	GCA_001312505.1	3259449	0.874648	0	0	0	41
TI1_Bin_9_Done2	1757566	160	14979	42.2274	63.3803	2.8169	GCA_000155875.1	3242215	0.542088	0	0	0	44
TI1_Bin_9_Done4	2229517	58	55888	40.6214	90.1408	0	GCF_000169235.1	3186031	0.699779	0	0	0	41
TI2_Bin_12_1	1819457	44	58617	59.9414	69.0141	1.40845	GCF_000196555.1	2385164	0.762823	0	0	0	42
TI2_Bin_12_10	1758376	164	12273	55.5185	66.1972	2.8169	GCA_003096535.1	2809383	0.625894	0	0	0	38
TI2_Bin_12_13	2104947	53	54173	60.9191	95.7746	0	GCA_018228685.1	2803929	0.750713	0	0	0	38
TI2_Bin_12_21	2473694	70	46317	57.7568	84.507	4.22535	GCF_003481705.1	2881618	0.858439	0	0	0	57
TI2_Bin_12_25	2517854	49	64678	59.6011	87.3239	0	GCF_006542665.1	3301347	0.762675	0	0	0	42
TI2_Bin_12_3	3331253	67	82839	63.3181	97.1831	0	GCF_000024265.1	3632260	0.91713	1	1	0	49
TI2_Bin_12_7	2656666	89	46531	63.3703	91.5493	1.40845	GCF_011405655.1	2908404	0.913445	1	0	0	50
TI2_Bin_12_8	3022842	90	54759	58.7089	91.5493	1.40845	GCF_000210575.1	3763317	0.803239	1	0	0	38
TI2_Bin_15_13	2447218	63	53496	41.5388	70.4225	0	GCF_000154065.1	2915433	0.839401	0	0	0	47
TI2_Bin_15_16	2487687	131	29097	43.1292	52.1127	1.40845	GCF_003477705.1	2953222	0.842364	0	0	0	37
TI2_Bin_15_17	2812119	75	59590	52.8384	95.7746	0	GCA_014385265.1	2775296	1.01327	0	0	0	55
TI2_Bin_15_19	2191133	127	21905	44.8981	81.6901	5.6338	GCF_009696065.1	3233390	0.677658	0	0	0	42
TI2_Bin_1_8	3868917	1430	3101	49.9128	50.7042	5.6338	GCF_002234575.2	6614036	0.584956	0	0	0	39
TI2_Bin_20_11	3674550	123	42651	42.2724	52.1127	4.22535	GCF_000156195.1	4892401	0.751073	0	0	0	46
TI2_Bin_20_3	1459803	163	10997	38.7217	74.6479	0	GCA_900542375.1	1947109	0.749728	0	0	0	21
TI2_Bin_20_4	2776698	51	90581	40.7313	98.5915	5.6338	GCF_003479605.1	2971866	0.934328	0	0	0	49
TI2_Bin_24_2	2816662	345	11590	38.3271	76.0563	0	GCA_003460745.1	3247666	0.867288	0	0	0	40
TI2_Bin_26_Done	1618228	897	1844	52.6865	54.9296	2.8169	GCA_900542245.1	2270996	0.712563	0	0	0	13
TI2_Bin_2_12	892930	465	2041	56.6267	60.5634	0	GCF_016901815.1	2349402	0.380067	0	0	0	12
TI2_Bin_8_10	3720841	127	41050	61.0721	74.6479	1.40845	GCF_000239295.1	3820124	0.974011	0	0	0	46
TI2_Bin_8_11	1762511	34	72972	60.3352	83.0986	1.40845	GCF_018408575.1	2557760	0.689084	0	0	0	44
TI2_Bin_8_Done1	2240458	116	27680	58.0264	60.5634	4.22535	NA	NA	NA	0	0	0	58
TI2_Bin_8_Done2	1903700	108	22748	60.2072	56.338	5.6338	GCA_900539945.1	2417777	0.787376	0	0	0	50
TI2_Bin_8_Osc_Done1	1797299	99	25566	55.1197	57.7465	0	GCA_018369915.1	2182280	0.823588	0	0	0	39
TI2_Bin_9_7	1511809	499	3496	38.0954	57.7465	4.22535	GCF_000332875.2	2772228	0.545341	0	0	0	15
TI3_1_Bin_0_1	2805799	1932	1413	39.3941	54.9296	25.3521	NA	NA	NA	0	0	0	24
TI3_1_Bin_13_2	1418358	504	3397	42.7479	50.7042	0	GCF_014334015.1	6746034	0.210251	0	0	0	21
TI3_1_Bin_16_4	2150088	19	145019	40.6611	95.7746	0	GCF_002834235.1	2400097	0.895834	0	0	0	41
TI3_1_Bin_3_8	1239969	51	220114	51.3057	66.1972	0	GCA_000435195.1	2048670	0.605256	0	2	0	22
TI3_1_Bin_4_1	1466838	742	2058	61.4139	53.5211	1.40845	GCF_005121165.2	3576111	0.410177	0	0	0	19
TI3_2_Bin_11_11	1472942	26	78876	57.0691	60.5634	0	GCF_000765235.1	2729704	0.539598	0	0	0	31
TI3_2_Bin_11_16	2175191	25	146896	54.6113	95.7746	0	GCF_000154465.1	2550678	0.852789	0	0	0	42
TI3_2_Bin_11_18	1481816	22	78983	63.1705	52.1127	0	GCF_001025135.1	2211039	0.67019	0	0	0	34
TI3_2_Bin_11_19	930540	25	62606	59.6353	52.1127	0	GCA_018380015.1	2129666	0.436942	0	0	0	25
TI3_2_Bin_11_27	2169583	30	112267	56.9561	95.7746	0	GCA_900104605.1	2390301	0.907661	0	0	0	41
TI3_2_Bin_4_2	2056549	1169	1801	64.3751	54.9296	2.8169	GCF_000241465.1	4264936	0.482199	1	1	0	22
TI3_2_Bin_5_10	2724968	37	120778	49.3894	92.9577	2.8169	GCA_000437795.1	2424020	1.12415	1	1	0	53
TI3_2_Bin_5_20	4722880	67	117237	44.8962	97.1831	1.40845	GCF_000012845.1	4811379	0.981606	0	0	0	59
TI3_2_Bin_5_21	2422549	132	18726	43.4119	53.5211	0	GCF_016908695.1	4503977	0.537869	0	0	0	22
TI3_2_Bin_5_27	2837044	66	61510	41.8305	95.7746	4.22535	GCF_000153905.1	3625508	0.782523	0	0	0	42
TI3_2_Bin_5_30	3056477	60	86450	43.041	100	4.22535	GCF_001406815.1	3334694	0.916569	0	0	0	45
TI3_2_Bin_5_32	3472945	260	16971	45.091	70.4225	5.6338	GCF_000154105.1	4434377	0.783187	0	0	0	41
TI3_2_Bin_8_21	754945	331	2658	38.5833	61.9718	1.40845	GCA_900542375.1	1947109	0.387726	0	0	0	15
DC1_Bin_1_3	1377223	607	2489	31.1006	72.3684	3.94737	GCF_000016525.1	1853160	0.743175	1	1	0	32

## Sheet: Table_S10
bins	total_length	num_contigs	N50	GC_content	percent_completion	percent_redundancy	GTDB_reference_accession	GTDB_genome_length	bin_length_ratio	Ribosomal_RNA_16S	Ribosomal_RNA_23S	Ribosomal_RNA_5S	Transfer_RNAs
Bin_0_2	2912333	225	18059	55.918	97.1831	5.6338	GCF_003324125.1	3508961	0.82997	0	0	0	42
Bin_0_47	1783987	159	15432	59.6114	90.1408	2.8169	GCF_000196555.1	2385164	0.747952	0	0	0	45
Bin_0_48	2886809	192	20921	62.2087	94.3662	2.8169	GCF_011405655.1	2908404	0.992575	1	1	0	47
Bin_0_49	1830221	22	161481	54.5144	98.5915	1.40845	GCA_000435675.1	1788464	1.02335	0	0	0	46
Bin_0_50	2429185	66	79905	60.4737	94.3662	1.40845	GCA_003525905.1	2194606	1.10689	0	0	0	39
Bin_13_17	5067567	130	64343	43.8716	92.9577	4.22535	GCF_000190535.1	4392288	1.15374	1	0	0	58
Bin_13_29	2651761	58	65850	50.2583	92.9577	2.8169	GCF_000455225.1	2737487	0.968684	0	0	0	60
Bin_13_36	3593009	70	94254	56.7156	94.3662	0	GCF_000210575.1	3763317	0.954745	0	0	0	44
Bin_13_37	2205332	29	135356	54.589	95.7746	0	GCF_000154465.1	2550678	0.864606	0	0	0	45
Bin_13_38	4693776	104	123315	44.5711	98.5915	4.22535	GCF_000154105.1	4434377	1.0585	0	0	0	74
Bin_13_41	2325801	40	114045	43.4315	94.3662	1.40845	GCF_003269275.1	2317131	1.00374	0	0	0	52
Bin_13_42	1898197	55	60556	46.6086	92.9577	5.6338	GCA_001917125.1	1836284	1.03372	0	0	0	37
Bin_13_48	2188216	58	56749	50.1636	97.1831	2.8169	GCF_000425045.1	2282467	0.958707	1	2	0	49
Bin_13_7	3061771	24	202640	58.5385	91.5493	0	GCF_000374505.1	3865648	0.792046	0	0	0	48
Bin_20_1	2652786	97	82557	56.7386	94.3662	0	GCF_018408575.1	2557760	1.03715	0	0	0	49
Bin_24_2	2726745	95	50202	29.579	97.1831	0	GCF_003024685.1	2793685	0.976039	0	0	0	49
Bin_24_3	2825529	104	53661	30.4931	100	5.6338	GCF_010669225.1	2568766	1.09996	0	1	0	61
Bin_24_4	2311355	32	260897	33.3964	100	5.6338	GCA_900545305.1	2175601	1.0624	2	2	0	44
Bin_24_5	2109185	166	21178	29.6891	95.7746	1.40845	GCA_900545035.1	1835602	1.14904	0	0	0	44
Bin_28_10	2591131	46	86999	43.1794	91.5493	2.8169	GCF_001406815.1	3334694	0.777022	1	0	0	42
Bin_28_3	2871818	81	48518	41.4427	97.1831	5.6338	GCF_000153925.1	2741706	1.04746	0	0	0	47
Bin_28_56	2555649	71	94495	43.821	97.1831	5.6338	GCF_000160055.1	1895960	1.34794	0	0	0	60
Bin_28_6	2269245	50	77416	40.6729	90.1408	1.40845	GCA_001312505.1	3259449	0.696205	0	0	0	32
Bin_28_8	2417347	50	66456	41.6731	91.5493	2.8169	GCF_000154065.1	2915433	0.829155	0	0	0	38
Bin_29_10	2157803	23	179673	37.1568	97.1831	0	GCA_000436835.1	1873859	1.15153	0	0	0	41
Bin_29_12	3325404	65	94685	38.5149	97.1831	4.22535	GCA_003481745.1	3362050	0.9891	0	0	0	59
Bin_29_13	2399675	77	46037	36.404	95.7746	0	GCA_000980375.1	2054369	1.16808	1	1	0	42
Bin_29_2	3019850	65	66903	41.9006	97.1831	5.6338	GCA_000020605.1	3449685	0.875399	0	0	0	63
Bin_29_4	2714929	46	124088	36.8627	90.1408	4.22535	GCA_900112995.1	2817405	0.963628	0	0	0	28
Bin_29_7	2389109	92	47711	38.5929	92.9577	2.8169	GCA_003460745.1	3247666	0.735639	0	0	0	38
Bin_2_9	5643793	162	79555	57.3132	98.5915	1.40845	GCF_000751755.1	5465736	1.03258	0	0	0	82
Bin_3_1	2733445	50	93644	50.0994	95.7746	0	GCA_900540275.1	2524518	1.08276	0	1	0	49
Bin_3_4	2864949	231	21026	49.6961	100	1.40845	GCF_000468015.1	3096487	0.925226	0	0	0	45
Bin_7_3	3430650	51	709630	37.9235	95.7746	0	GCA_902168225.1	3609915	0.950341	1	1	0	35

[truncated: 1 more sheets: Table_S11]
