# Supplementary material for: Microbial-enrichment method enables high-throughput metagenomic characterization from host-rich samples
Source: Springer Nature journal article supplement (doi:10.1038/s41592-023-02025-4), 2023-10-12
Supplement: MOESM8 [file 41592_2023_2025_MOESM8_ESM.xlsx]

## Sheet: CT18_Species
#mpa_v30_CHOCOPhlAn_201901
clade_name	NCBI_tax_id	CT18_HD2_kneaddata_combined_metaphlan_bugs_list	CT18_HD1_kneaddata_combined_metaphlan_bugs_list	kneaddata_combined_metaphlan_bugs_list_x	kneaddata_combined_metaphlan_bugs_list_y
UNKNOWN	-1	0	0	100	0
k__Bacteria	2	99.9998	100	0	100
k__Bacteria|p__Actinobacteria	2|201174	1.02626	1.44945	0	0
k__Bacteria|p__Actinobacteria|c__Actinobacteria	2|201174|1760	0.2633	0.24495	0	0
k__Bacteria|p__Actinobacteria|c__Actinobacteria|o__Actinomycetales	2|201174|1760|2037	0.05711	0.00969	0	0
k__Bacteria|p__Actinobacteria|c__Actinobacteria|o__Actinomycetales|f__Actinomycetaceae	2|201174|1760|2037|2049	0.05711	0.00969	0	0
k__Bacteria|p__Actinobacteria|c__Actinobacteria|o__Actinomycetales|f__Actinomycetaceae|g__Actinomyces	2|201174|1760|2037|2049|1654	0.05711	0.00969	0	0
k__Bacteria|p__Actinobacteria|c__Actinobacteria|o__Actinomycetales|f__Actinomycetaceae|g__Actinomyces|s__Actinomyces_graevenitzii	2|201174|1760|2037|2049|1654|55565	0.00679	0	0	0
k__Bacteria|p__Actinobacteria|c__Actinobacteria|o__Actinomycetales|f__Actinomycetaceae|g__Actinomyces|s__Actinomyces_odontolyticus	2|201174|1760|2037|2049|1654|1660	0.00343	0	0	0
k__Bacteria|p__Actinobacteria|c__Actinobacteria|o__Actinomycetales|f__Actinomycetaceae|g__Actinomyces|s__Actinomyces_oris	2|201174|1760|2037|2049|1654|544580	0.00248	0	0	0
k__Bacteria|p__Actinobacteria|c__Actinobacteria|o__Actinomycetales|f__Actinomycetaceae|g__Actinomyces|s__Actinomyces_sp_HMSC035G02	2|201174|1760|2037|2049|1654|1739406	0.00267	0	0	0
k__Bacteria|p__Actinobacteria|c__Actinobacteria|o__Actinomycetales|f__Actinomycetaceae|g__Actinomyces|s__Actinomyces_sp_HPA0247	2|201174|1760|2037|2049|1654|1203556	0.00068	0	0	0
k__Bacteria|p__Actinobacteria|c__Actinobacteria|o__Actinomycetales|f__Actinomycetaceae|g__Actinomyces|s__Actinomyces_sp_ICM47	2|201174|1760|2037|2049|1654|936548	0.03991	0.00969	0	0
k__Bacteria|p__Actinobacteria|c__Actinobacteria|o__Actinomycetales|f__Actinomycetaceae|g__Actinomyces|s__Actinomyces_sp_S6_Spd3	2|201174|1760|2037|2049|1654|1284680	0.00067	0	0	0
k__Bacteria|p__Actinobacteria|c__Actinobacteria|o__Actinomycetales|f__Actinomycetaceae|g__Actinomyces|s__Actinomyces_sp_oral_taxon_181	2|201174|1760|2037|2049|1654|712121	0.00048	0	0	0
k__Bacteria|p__Actinobacteria|c__Actinobacteria|o__Bifidobacteriales	2|201174|1760|85004	0.1799	0.20267	0	0
k__Bacteria|p__Actinobacteria|c__Actinobacteria|o__Bifidobacteriales|f__Bifidobacteriaceae	2|201174|1760|85004|31953	0.1799	0.20267	0	0
k__Bacteria|p__Actinobacteria|c__Actinobacteria|o__Bifidobacteriales|f__Bifidobacteriaceae|g__Bifidobacterium	2|201174|1760|85004|31953|1678	0.1799	0.20267	0	0
k__Bacteria|p__Actinobacteria|c__Actinobacteria|o__Bifidobacteriales|f__Bifidobacteriaceae|g__Bifidobacterium|s__Bifidobacterium_adolescentis	2|201174|1760|85004|31953|1678|1680	0.00295	0.00155	0	0
k__Bacteria|p__Actinobacteria|c__Actinobacteria|o__Bifidobacteriales|f__Bifidobacteriaceae|g__Bifidobacterium|s__Bifidobacterium_dentium	2|201174|1760|85004|31953|1678|1689	0.00926	0	0	0
k__Bacteria|p__Actinobacteria|c__Actinobacteria|o__Bifidobacteriales|f__Bifidobacteriaceae|g__Bifidobacterium|s__Bifidobacterium_longum	2|201174|1760|85004|31953|1678|216816	0.16671	0.20112	0	0
k__Bacteria|p__Actinobacteria|c__Actinobacteria|o__Bifidobacteriales|f__Bifidobacteriaceae|g__Bifidobacterium|s__Bifidobacterium_pseudocatenulatum	2|201174|1760|85004|31953|1678|28026	0.00099	0	0	0
k__Bacteria|p__Actinobacteria|c__Actinobacteria|o__Corynebacteriales	2|201174|1760|85007	0.00078	0	0	0
k__Bacteria|p__Actinobacteria|c__Actinobacteria|o__Corynebacteriales|f__Corynebacteriaceae	2|201174|1760|85007|1653	0.00027	0	0	0
k__Bacteria|p__Actinobacteria|c__Actinobacteria|o__Corynebacteriales|f__Corynebacteriaceae|g__Corynebacterium	2|201174|1760|85007|1653|1716	0.00027	0	0	0
k__Bacteria|p__Actinobacteria|c__Actinobacteria|o__Corynebacteriales|f__Corynebacteriaceae|g__Corynebacterium|s__Corynebacterium_accolens	2|201174|1760|85007|1653|1716|38284	0.00027	0	0	0
k__Bacteria|p__Actinobacteria|c__Actinobacteria|o__Corynebacteriales|f__Mycobacteriaceae	2|201174|1760|85007|1762	0.00051	0	0	0
k__Bacteria|p__Actinobacteria|c__Actinobacteria|o__Corynebacteriales|f__Mycobacteriaceae|g__Mycolicibacterium	2|201174|1760|85007|1762|1866885	0.00051	0	0	0
k__Bacteria|p__Actinobacteria|c__Actinobacteria|o__Corynebacteriales|f__Mycobacteriaceae|g__Mycolicibacterium|s__Mycolicibacterium_mucogenicum	2|201174|1760|85007|1762|1866885|56689	0.00051	0	0	0
k__Bacteria|p__Actinobacteria|c__Actinobacteria|o__Micrococcales	2|201174|1760|85006	0.00172	0.00324	0	0
k__Bacteria|p__Actinobacteria|c__Actinobacteria|o__Micrococcales|f__Micrococcaceae	2|201174|1760|85006|1268	0.00172	0.00324	0	0
k__Bacteria|p__Actinobacteria|c__Actinobacteria|o__Micrococcales|f__Micrococcaceae|g__Micrococcus	2|201174|1760|85006|1268|1269	0.0017	0.00324	0	0
k__Bacteria|p__Actinobacteria|c__Actinobacteria|o__Micrococcales|f__Micrococcaceae|g__Micrococcus|s__Micrococcus_aloeverae	2|201174|1760|85006|1268|1269|1391911	0	0.00192	0	0
k__Bacteria|p__Actinobacteria|c__Actinobacteria|o__Micrococcales|f__Micrococcaceae|g__Micrococcus|s__Micrococcus_luteus	2|201174|1760|85006|1268|1269|1270	0.0017	0.00132	0	0
k__Bacteria|p__Actinobacteria|c__Actinobacteria|o__Micrococcales|f__Micrococcaceae|g__Rothia	2|201174|1760|85006|1268|32207	2e-05	0	0	0
k__Bacteria|p__Actinobacteria|c__Actinobacteria|o__Micrococcales|f__Micrococcaceae|g__Rothia|s__Rothia_mucilaginosa	2|201174|1760|85006|1268|32207|43675	2e-05	0	0	0
k__Bacteria|p__Actinobacteria|c__Actinobacteria|o__Propionibacteriales	2|201174|1760|85009	0.02378	0.02935	0	0
k__Bacteria|p__Actinobacteria|c__Actinobacteria|o__Propionibacteriales|f__Propionibacteriaceae	2|201174|1760|85009|31957	0.02378	0.02935	0	0
k__Bacteria|p__Actinobacteria|c__Actinobacteria|o__Propionibacteriales|f__Propionibacteriaceae|g__Cutibacterium	2|201174|1760|85009|31957|1912216	0.02378	0.02935	0	0
k__Bacteria|p__Actinobacteria|c__Actinobacteria|o__Propionibacteriales|f__Propionibacteriaceae|g__Cutibacterium|s__Cutibacterium_acnes	2|201174|1760|85009|31957|1912216|1747	0.02255	0.02678	0	0
k__Bacteria|p__Actinobacteria|c__Actinobacteria|o__Propionibacteriales|f__Propionibacteriaceae|g__Cutibacterium|s__Cutibacterium_granulosum	2|201174|1760|85009|31957|1912216|33011	0.00123	0.00257	0	0
k__Bacteria|p__Actinobacteria|c__Coriobacteriia	2|201174|84998	0.76297	1.2045	0	0
k__Bacteria|p__Actinobacteria|c__Coriobacteriia|o__Coriobacteriales	2|201174|84998|84999	0.62069	1.0019	0	0
k__Bacteria|p__Actinobacteria|c__Coriobacteriia|o__Coriobacteriales|f__Coriobacteriaceae	2|201174|84998|84999|84107	0.62069	1.0019	0	0
k__Bacteria|p__Actinobacteria|c__Coriobacteriia|o__Coriobacteriales|f__Coriobacteriaceae|g__Collinsella	2|201174|84998|84999|84107|102106	0.62069	1.0019	0	0
k__Bacteria|p__Actinobacteria|c__Coriobacteriia|o__Coriobacteriales|f__Coriobacteriaceae|g__Collinsella|s__Collinsella_aerofaciens	2|201174|84998|84999|84107|102106|74426	0.61948	1.00062	0	0
k__Bacteria|p__Actinobacteria|c__Coriobacteriia|o__Coriobacteriales|f__Coriobacteriaceae|g__Collinsella|s__Collinsella_stercoris	2|201174|84998|84999|84107|102106|147206	0.00121	0.00128	0	0
k__Bacteria|p__Actinobacteria|c__Coriobacteriia|o__Eggerthellales	2|201174|84998|1643822	0.14227	0.2026	0	0
k__Bacteria|p__Actinobacteria|c__Coriobacteriia|o__Eggerthellales|f__Eggerthellaceae	2|201174|84998|1643822|1643826	0.14227	0.2026	0	0
k__Bacteria|p__Actinobacteria|c__Coriobacteriia|o__Eggerthellales|f__Eggerthellaceae|g__Adlercreutzia	2|201174|84998|1643822|1643826|447020	0.05506	0.09463	0	0
k__Bacteria|p__Actinobacteria|c__Coriobacteriia|o__Eggerthellales|f__Eggerthellaceae|g__Adlercreutzia|s__Adlercreutzia_equolifaciens	2|201174|84998|1643822|1643826|447020|446660	0.05506	0.09463	0	0
k__Bacteria|p__Actinobacteria|c__Coriobacteriia|o__Eggerthellales|f__Eggerthellaceae|g__Asaccharobacter	2|201174|84998|1643822|1643826|553372	0.0641	0.08921	0	0
k__Bacteria|p__Actinobacteria|c__Coriobacteriia|o__Eggerthellales|f__Eggerthellaceae|g__Asaccharobacter|s__Asaccharobacter_celatus	2|201174|84998|1643822|1643826|553372|394340	0.0641	0.08921	0	0
k__Bacteria|p__Actinobacteria|c__Coriobacteriia|o__Eggerthellales|f__Eggerthellaceae|g__Eggerthella	2|201174|84998|1643822|1643826|84111	0.01046	0.00801	0	0
k__Bacteria|p__Actinobacteria|c__Coriobacteriia|o__Eggerthellales|f__Eggerthellaceae|g__Eggerthella|s__Eggerthella_lenta	2|201174|84998|1643822|1643826|84111|84112	0.01046	0.00801	0	0
k__Bacteria|p__Actinobacteria|c__Coriobacteriia|o__Eggerthellales|f__Eggerthellaceae|g__Enterorhabdus	2|201174|84998|1643822|1643826|580024	0.0006	0.0005	0	0
k__Bacteria|p__Actinobacteria|c__Coriobacteriia|o__Eggerthellales|f__Eggerthellaceae|g__Enterorhabdus|s__Enterorhabdus_caecimuris	2|201174|84998|1643822|1643826|580024|671266	0.0006	0.0005	0	0
k__Bacteria|p__Actinobacteria|c__Coriobacteriia|o__Eggerthellales|f__Eggerthellaceae|g__Gordonibacter	2|201174|84998|1643822|1643826|644652	0.01205	0.01025	0	0
k__Bacteria|p__Actinobacteria|c__Coriobacteriia|o__Eggerthellales|f__Eggerthellaceae|g__Gordonibacter|s__Gordonibacter_pamelaeae	2|201174|84998|1643822|1643826|644652|471189	0.01205	0.01025	0	0
k__Bacteria|p__Bacteroidetes	2|976	18.6021	27.1378	0	10.4545
k__Bacteria|p__Bacteroidetes|c__Bacteroidia	2|976|200643	18.5919	27.1096	0	10.4545
k__Bacteria|p__Bacteroidetes|c__Bacteroidia|o__Bacteroidales	2|976|200643|171549	18.5919	27.1096	0	10.4545
k__Bacteria|p__Bacteroidetes|c__Bacteroidia|o__Bacteroidales|f__Bacteroidaceae	2|976|200643|171549|815	13.5363	17.7925	0	10.4545
k__Bacteria|p__Bacteroidetes|c__Bacteroidia|o__Bacteroidales|f__Bacteroidaceae|g__Bacteroides	2|976|200643|171549|815|816	13.5363	17.7925	0	10.4545
k__Bacteria|p__Bacteroidetes|c__Bacteroidia|o__Bacteroidales|f__Bacteroidaceae|g__Bacteroides|s__Bacteroides_cellulosilyticus	2|976|200643|171549|815|816|246787	0.03109	0.02225	0	0
k__Bacteria|p__Bacteroidetes|c__Bacteroidia|o__Bacteroidales|f__Bacteroidaceae|g__Bacteroides|s__Bacteroides_dorei	2|976|200643|171549|815|816|357276	1.73949	2.12923	0	0
k__Bacteria|p__Bacteroidetes|c__Bacteroidia|o__Bacteroidales|f__Bacteroidaceae|g__Bacteroides|s__Bacteroides_finegoldii	2|976|200643|171549|815|816|338188	0.17118	0.18572	0	0
k__Bacteria|p__Bacteroidetes|c__Bacteroidia|o__Bacteroidales|f__Bacteroidaceae|g__Bacteroides|s__Bacteroides_fragilis	2|976|200643|171549|815|816|817	5.40286	8.2441	0	0
k__Bacteria|p__Bacteroidetes|c__Bacteroidia|o__Bacteroidales|f__Bacteroidaceae|g__Bacteroides|s__Bacteroides_galacturonicus	2|976|200643|171549|815|816|384639	0	0.15662	0	0
k__Bacteria|p__Bacteroidetes|c__Bacteroidia|o__Bacteroidales|f__Bacteroidaceae|g__Bacteroides|s__Bacteroides_ovatus	2|976|200643|171549|815|816|28116	0.0043	0	0	0
k__Bacteria|p__Bacteroidetes|c__Bacteroidia|o__Bacteroidales|f__Bacteroidaceae|g__Bacteroides|s__Bacteroides_stercoris	2|976|200643|171549|815|816|46506	0.45759	0.29348	0	0
k__Bacteria|p__Bacteroidetes|c__Bacteroidia|o__Bacteroidales|f__Bacteroidaceae|g__Bacteroides|s__Bacteroides_thetaiotaomicron	2|976|200643|171549|815|816|818	0.98217	1.34965	0	0
k__Bacteria|p__Bacteroidetes|c__Bacteroidia|o__Bacteroidales|f__Bacteroidaceae|g__Bacteroides|s__Bacteroides_uniformis	2|976|200643|171549|815|816|820	0.753	1.15093	0	0
k__Bacteria|p__Bacteroidetes|c__Bacteroidia|o__Bacteroidales|f__Bacteroidaceae|g__Bacteroides|s__Bacteroides_vulgatus	2|976|200643|171549|815|816|821	3.83988	4.06726	0	10.4545
k__Bacteria|p__Bacteroidetes|c__Bacteroidia|o__Bacteroidales|f__Bacteroidaceae|g__Bacteroides|s__Bacteroides_xylanisolvens	2|976|200643|171549|815|816|371601	0.1548	0.19329	0	0
k__Bacteria|p__Bacteroidetes|c__Bacteroidia|o__Bacteroidales|f__Odoribacteraceae	2|976|200643|171549|1853231	0.50613	0.59482	0	0
k__Bacteria|p__Bacteroidetes|c__Bacteroidia|o__Bacteroidales|f__Odoribacteraceae|g__Odoribacter	2|976|200643|171549|1853231|283168	0.50613	0.59482	0	0
k__Bacteria|p__Bacteroidetes|c__Bacteroidia|o__Bacteroidales|f__Odoribacteraceae|g__Odoribacter|s__Odoribacter_splanchnicus	2|976|200643|171549|1853231|283168|28118	0.50613	0.59482	0	0
k__Bacteria|p__Bacteroidetes|c__Bacteroidia|o__Bacteroidales|f__Prevotellaceae	2|976|200643|171549|171552	0.00159	0	0	0
k__Bacteria|p__Bacteroidetes|c__Bacteroidia|o__Bacteroidales|f__Prevotellaceae|g__Alloprevotella	2|976|200643|171549|171552|1283313	0.00159	0	0	0
k__Bacteria|p__Bacteroidetes|c__Bacteroidia|o__Bacteroidales|f__Prevotellaceae|g__Alloprevotella|s__Alloprevotella_tannerae	2|976|200643|171549|171552|1283313|76122	0.00159	0	0	0
k__Bacteria|p__Bacteroidetes|c__Bacteroidia|o__Bacteroidales|f__Rikenellaceae	2|976|200643|171549|171550	2.01074	5.02768	0	0
k__Bacteria|p__Bacteroidetes|c__Bacteroidia|o__Bacteroidales|f__Rikenellaceae|g__Alistipes	2|976|200643|171549|171550|239759	2.01074	5.02768	0	0
k__Bacteria|p__Bacteroidetes|c__Bacteroidia|o__Bacteroidales|f__Rikenellaceae|g__Alistipes|s__Alistipes_finegoldii	2|976|200643|171549|171550|239759|214856	0.54209	0.91963	0	0
k__Bacteria|p__Bacteroidetes|c__Bacteroidia|o__Bacteroidales|f__Rikenellaceae|g__Alistipes|s__Alistipes_indistinctus	2|976|200643|171549|171550|239759|626932	0.00195	0	0	0
k__Bacteria|p__Bacteroidetes|c__Bacteroidia|o__Bacteroidales|f__Rikenellaceae|g__Alistipes|s__Alistipes_putredinis	2|976|200643|171549|171550|239759|28117	1.15111	3.54316	0	0
k__Bacteria|p__Bacteroidetes|c__Bacteroidia|o__Bacteroidales|f__Rikenellaceae|g__Alistipes|s__Alistipes_shahii	2|976|200643|171549|171550|239759|328814	0.31558	0.56489	0	0
k__Bacteria|p__Bacteroidetes|c__Bacteroidia|o__Bacteroidales|f__Tannerellaceae	2|976|200643|171549|2005525	2.53708	3.69461	0	0
k__Bacteria|p__Bacteroidetes|c__Bacteroidia|o__Bacteroidales|f__Tannerellaceae|g__Parabacteroides	2|976|200643|171549|2005525|375288	2.53708	3.69461	0	0
k__Bacteria|p__Bacteroidetes|c__Bacteroidia|o__Bacteroidales|f__Tannerellaceae|g__Parabacteroides|s__Parabacteroides_distasonis	2|976|200643|171549|2005525|375288|823	0.93072	1.66192	0	0
k__Bacteria|p__Bacteroidetes|c__Bacteroidia|o__Bacteroidales|f__Tannerellaceae|g__Parabacteroides|s__Parabacteroides_merdae	2|976|200643|171549|2005525|375288|46503	1.60637	2.03269	0	0
k__Bacteria|p__Bacteroidetes|c__Chitinophagia	2|976|1853228	0.00189	0.00061	0	0
k__Bacteria|p__Bacteroidetes|c__Chitinophagia|o__Chitinophagales	2|976|1853228|1853229	0.00189	0.00061	0	0
k__Bacteria|p__Bacteroidetes|c__Chitinophagia|o__Chitinophagales|f__Chitinophagaceae	2|976|1853228|1853229|563835	0.00189	0.00061	0	0
k__Bacteria|p__Bacteroidetes|c__Chitinophagia|o__Chitinophagales|f__Chitinophagaceae|g__Vibrionimonas	2|976|1853228|1853229|563835|1649511	0.00189	0.00061	0	0
k__Bacteria|p__Bacteroidetes|c__Chitinophagia|o__Chitinophagales|f__Chitinophagaceae|g__Vibrionimonas|s__Vibrionimonas_magnilacihabitans	2|976|1853228|1853229|563835|1649511|669455	0.00189	0.00061	0	0
k__Bacteria|p__Bacteroidetes|c__Flavobacteriia	2|976|117743	0.00053	0.01128	0	0
k__Bacteria|p__Bacteroidetes|c__Flavobacteriia|o__Flavobacteriales	2|976|117743|200644	0.00053	0.01128	0	0
k__Bacteria|p__Bacteroidetes|c__Flavobacteriia|o__Flavobacteriales|f__Flavobacteriaceae	2|976|117743|200644|49546	0.00053	0.01128	0	0
k__Bacteria|p__Bacteroidetes|c__Flavobacteriia|o__Flavobacteriales|f__Flavobacteriaceae|g__Bergeyella	2|976|117743|200644|49546|59735	0	0.00919	0	0
k__Bacteria|p__Bacteroidetes|c__Flavobacteriia|o__Flavobacteriales|f__Flavobacteriaceae|g__Bergeyella|s__Bergeyella_zoohelcum	2|976|117743|200644|49546|59735|1015	0	0.00919	0	0
k__Bacteria|p__Bacteroidetes|c__Flavobacteriia|o__Flavobacteriales|f__Flavobacteriaceae|g__Cloacibacterium	2|976|117743|200644|49546|501783	0.00053	0.00208	0	0
k__Bacteria|p__Bacteroidetes|c__Flavobacteriia|o__Flavobacteriales|f__Flavobacteriaceae|g__Cloacibacterium|s__Cloacibacterium_normanense	2|976|117743|200644|49546|501783|237258	0.00053	0.00208	0	0
k__Bacteria|p__Bacteroidetes|c__Sphingobacteriia	2|976|117747	0.00784	0.01631	0	0
k__Bacteria|p__Bacteroidetes|c__Sphingobacteriia|o__Sphingobacteriales	2|976|117747|200666	0.00784	0.01631	0	0
k__Bacteria|p__Bacteroidetes|c__Sphingobacteriia|o__Sphingobacteriales|f__Sphingobacteriaceae	2|976|117747|200666|84566	0.00784	0.01631	0	0
k__Bacteria|p__Bacteroidetes|c__Sphingobacteriia|o__Sphingobacteriales|f__Sphingobacteriaceae|g__Pedobacter	2|976|117747|200666|84566|84567	0.00784	0.01631	0	0
k__Bacteria|p__Bacteroidetes|c__Sphingobacteriia|o__Sphingobacteriales|f__Sphingobacteriaceae|g__Pedobacter|s__Pedobacter_nutrimenti	2|976|117747|200666|84566|84567|1241337	0.00784	0.01631	0	0
k__Bacteria|p__Firmicutes	2|1239	26.1947	39.6992	0	67.0037
k__Bacteria|p__Firmicutes|c__Bacilli	2|1239|91061	2.16468	1.93474	0	0
k__Bacteria|p__Firmicutes|c__Bacilli|o__Bacillales	2|1239|91061|1385	0.00719	0.00317	0	0
k__Bacteria|p__Firmicutes|c__Bacilli|o__Bacillales|f__Bacillales_unclassified		0.00313	0	0	0
k__Bacteria|p__Firmicutes|c__Bacilli|o__Bacillales|f__Bacillales_unclassified|g__Gemella	2|1239|91061|1385||1378	0.00313	0	0	0
k__Bacteria|p__Firmicutes|c__Bacilli|o__Bacillales|f__Bacillales_unclassified|g__Gemella|s__Gemella_haemolysans	2|1239|91061|1385||1378|1379	0.00058	0	0	0
k__Bacteria|p__Firmicutes|c__Bacilli|o__Bacillales|f__Bacillales_unclassified|g__Gemella|s__Gemella_sanguinis	2|1239|91061|1385||1378|84135	0.00256	0	0	0
k__Bacteria|p__Firmicutes|c__Bacilli|o__Bacillales|f__Staphylococcaceae	2|1239|91061|1385|90964	0.00406	0.00317	0	0
k__Bacteria|p__Firmicutes|c__Bacilli|o__Bacillales|f__Staphylococcaceae|g__Staphylococcus	2|1239|91061|1385|90964|1279	0.00406	0.00317	0	0
k__Bacteria|p__Firmicutes|c__Bacilli|o__Bacillales|f__Staphylococcaceae|g__Staphylococcus|s__Staphylococcus_epidermidis	2|1239|91061|1385|90964|1279|1282	0.00106	0.00317	0	0
k__Bacteria|p__Firmicutes|c__Bacilli|o__Bacillales|f__Staphylococcaceae|g__Staphylococcus|s__Staphylococcus_hominis	2|1239|91061|1385|90964|1279|1290	0.00299	0	0	0
k__Bacteria|p__Firmicutes|c__Bacilli|o__Lactobacillales	2|1239|91061|186826	2.15749	1.93157	0	0
k__Bacteria|p__Firmicutes|c__Bacilli|o__Lactobacillales|f__Aerococcaceae	2|1239|91061|186826|186827	0.00063	0	0	0
k__Bacteria|p__Firmicutes|c__Bacilli|o__Lactobacillales|f__Aerococcaceae|g__Abiotrophia	2|1239|91061|186826|186827|46123	0.00063	0	0	0
k__Bacteria|p__Firmicutes|c__Bacilli|o__Lactobacillales|f__Aerococcaceae|g__Abiotrophia|s__Abiotrophia_defectiva	2|1239|91061|186826|186827|46123|46125	0.00054	0	0	0
k__Bacteria|p__Firmicutes|c__Bacilli|o__Lactobacillales|f__Aerococcaceae|g__Abiotrophia|s__Abiotrophia_sp_HMSC24B09	2|1239|91061|186826|186827|46123|1581061	9e-05	0	0	0
k__Bacteria|p__Firmicutes|c__Bacilli|o__Lactobacillales|f__Lactobacillaceae	2|1239|91061|186826|33958	0.16112	0.1693	0	0
k__Bacteria|p__Firmicutes|c__Bacilli|o__Lactobacillales|f__Lactobacillaceae|g__Lactobacillus	2|1239|91061|186826|33958|1578	0.16112	0.1693	0	0
k__Bacteria|p__Firmicutes|c__Bacilli|o__Lactobacillales|f__Lactobacillaceae|g__Lactobacillus|s__Lactobacillus_fermentum	2|1239|91061|186826|33958|1578|1613	0.09985	0.0656	0	0
k__Bacteria|p__Firmicutes|c__Bacilli|o__Lactobacillales|f__Lactobacillaceae|g__Lactobacillus|s__Lactobacillus_gasseri	2|1239|91061|186826|33958|1578|1596	0.00085	0	0	0
k__Bacteria|p__Firmicutes|c__Bacilli|o__Lactobacillales|f__Lactobacillaceae|g__Lactobacillus|s__Lactobacillus_rogosae	2|1239|91061|186826|33958|1578|706562	0.05483	0.10046	0	0
k__Bacteria|p__Firmicutes|c__Bacilli|o__Lactobacillales|f__Lactobacillaceae|g__Lactobacillus|s__Lactobacillus_vaginalis	2|1239|91061|186826|33958|1578|1633	0.00559	0.00324	0	0
k__Bacteria|p__Firmicutes|c__Bacilli|o__Lactobacillales|f__Streptococcaceae	2|1239|91061|186826|1300	1.99574	1.76227	0	0
k__Bacteria|p__Firmicutes|c__Bacilli|o__Lactobacillales|f__Streptococcaceae|g__Streptococcus	2|1239|91061|186826|1300|1301	1.99574	1.76227	0	0
k__Bacteria|p__Firmicutes|c__Bacilli|o__Lactobacillales|f__Streptococcaceae|g__Streptococcus|s__Streptococcus_anginosus_group	2|1239|91061|186826|1300|1301|671232	0.00898	0	0	0
k__Bacteria|p__Firmicutes|c__Bacilli|o__Lactobacillales|f__Streptococcaceae|g__Streptococcus|s__Streptococcus_australis	2|1239|91061|186826|1300|1301|113107	0.00137	0	0	0
k__Bacteria|p__Firmicutes|c__Bacilli|o__Lactobacillales|f__Streptococcaceae|g__Streptococcus|s__Streptococcus_gordonii	2|1239|91061|186826|1300|1301|1302	0.00428	0	0	0
k__Bacteria|p__Firmicutes|c__Bacilli|o__Lactobacillales|f__Streptococcaceae|g__Streptococcus|s__Streptococcus_infantis	2|1239|91061|186826|1300|1301|68892	0.00914	0.00513	0	0
k__Bacteria|p__Firmicutes|c__Bacilli|o__Lactobacillales|f__Streptococcaceae|g__Streptococcus|s__Streptococcus_mitis	2|1239|91061|186826|1300|1301|28037	0.01496	0.00523	0	0
k__Bacteria|p__Firmicutes|c__Bacilli|o__Lactobacillales|f__Streptococcaceae|g__Streptococcus|s__Streptococcus_mutans	2|1239|91061|186826|1300|1301|1309	0.0021	0	0	0
k__Bacteria|p__Firmicutes|c__Bacilli|o__Lactobacillales|f__Streptococcaceae|g__Streptococcus|s__Streptococcus_oralis	2|1239|91061|186826|1300|1301|1303	0.00134	0	0	0
k__Bacteria|p__Firmicutes|c__Bacilli|o__Lactobacillales|f__Streptococcaceae|g__Streptococcus|s__Streptococcus_parasanguinis	2|1239|91061|186826|1300|1301|1318	0.27275	0.25312	0	0
k__Bacteria|p__Firmicutes|c__Bacilli|o__Lactobacillales|f__Streptococcaceae|g__Streptococcus|s__Streptococcus_salivarius	2|1239|91061|186826|1300|1301|1304	1.67673	1.49879	0	0
k__Bacteria|p__Firmicutes|c__Bacilli|o__Lactobacillales|f__Streptococcaceae|g__Streptococcus|s__Streptococcus_sanguinis	2|1239|91061|186826|1300|1301|1305	0.0034	0	0	0
k__Bacteria|p__Firmicutes|c__Bacilli|o__Lactobacillales|f__Streptococcaceae|g__Streptococcus|s__Streptococcus_sp_A12	2|1239|91061|186826|1300|1301|1759399	0.00022	0	0	0
k__Bacteria|p__Firmicutes|c__Bacilli|o__Lactobacillales|f__Streptococcaceae|g__Streptococcus|s__Streptococcus_vestibularis	2|1239|91061|186826|1300|1301|1343	0.00048	0	0	0
k__Bacteria|p__Firmicutes|c__Clostridia	2|1239|186801	19.5784	31.0907	0	67.0037
k__Bacteria|p__Firmicutes|c__Clostridia|o__Clostridiales	2|1239|186801|186802	19.5784	31.0907	0	67.0037
k__Bacteria|p__Firmicutes|c__Clostridia|o__Clostridiales|f__Clostridiaceae	2|1239|186801|186802|31979	0.13864	0.24005	0	0
k__Bacteria|p__Firmicutes|c__Clostridia|o__Clostridiales|f__Clostridiaceae|g__Clostridium	2|1239|186801|186802|31979|1485	0.13864	0.24005	0	0
k__Bacteria|p__Firmicutes|c__Clostridia|o__Clostridiales|f__Clostridiaceae|g__Clostridium|s__Clostridium_bolteae_CAG_59	2|1239|186801|186802|31979|1485|1263064	0	0.01985	0	0
k__Bacteria|p__Firmicutes|c__Clostridia|o__Clostridiales|f__Clostridiaceae|g__Clostridium|s__Clostridium_sp_CAG_242	2|1239|186801|186802|31979|1485|1262783	0.00945	0.00871	0	0
k__Bacteria|p__Firmicutes|c__Clostridia|o__Clostridiales|f__Clostridiaceae|g__Clostridium|s__Clostridium_sp_CAG_58	2|1239|186801|186802|31979|1485|1262824	0.12919	0.2115	0	0
k__Bacteria|p__Firmicutes|c__Clostridia|o__Clostridiales|f__Clostridiales_Family_XIII_Incertae_Sedis	2|1239|186801|186802|543314	0.00028	0	0	0
k__Bacteria|p__Firmicutes|c__Clostridia|o__Clostridiales|f__Clostridiales_Family_XIII_Incertae_Sedis|g__Mogibacterium	2|1239|186801|186802|543314|86331	0.00028	0	0	0
k__Bacteria|p__Firmicutes|c__Clostridia|o__Clostridiales|f__Clostridiales_Family_XIII_Incertae_Sedis|g__Mogibacterium|s__Mogibacterium_diversum	2|1239|186801|186802|543314|86331|114527	0.00028	0	0	0
k__Bacteria|p__Firmicutes|c__Clostridia|o__Clostridiales|f__Clostridiales_unclassified		0.17224	0.19917	0	0
k__Bacteria|p__Firmicutes|c__Clostridia|o__Clostridiales|f__Clostridiales_unclassified|g__Clostridiales_unclassified		0.00103	0	0	0
k__Bacteria|p__Firmicutes|c__Clostridia|o__Clostridiales|f__Clostridiales_unclassified|g__Clostridiales_unclassified|s__Clostridiales_bacterium_1_7_47FAA	2|1239|186801|186802|||457421	0.00103	0	0	0
k__Bacteria|p__Firmicutes|c__Clostridia|o__Clostridiales|f__Clostridiales_unclassified|g__Intestinimonas	2|1239|186801|186802||1392389	0.0547	0.06374	0	0
k__Bacteria|p__Firmicutes|c__Clostridia|o__Clostridiales|f__Clostridiales_unclassified|g__Intestinimonas|s__Intestinimonas_butyriciproducens	2|1239|186801|186802||1392389|1297617	0.0547	0.06374	0	0
k__Bacteria|p__Firmicutes|c__Clostridia|o__Clostridiales|f__Clostridiales_unclassified|g__Lawsonibacter	2|1239|186801|186802||2172004	0.07495	0.08139	0	0
k__Bacteria|p__Firmicutes|c__Clostridia|o__Clostridiales|f__Clostridiales_unclassified|g__Lawsonibacter|s__Lawsonibacter_asaccharolyticus	2|1239|186801|186802||2172004|2108523	0.07495	0.08139	0	0
k__Bacteria|p__Firmicutes|c__Clostridia|o__Clostridiales|f__Clostridiales_unclassified|g__Monoglobus	2|1239|186801|186802||2039302	0.04156	0.05404	0	0
k__Bacteria|p__Firmicutes|c__Clostridia|o__Clostridiales|f__Clostridiales_unclassified|g__Monoglobus|s__Monoglobus_pectinilyticus	2|1239|186801|186802||2039302|1981510	0.04156	0.05404	0	0
k__Bacteria|p__Firmicutes|c__Clostridia|o__Clostridiales|f__Eubacteriaceae	2|1239|186801|186802|186806	1.25287	1.84485	0	0
k__Bacteria|p__Firmicutes|c__Clostridia|o__Clostridiales|f__Eubacteriaceae|g__Eubacterium	2|1239|186801|186802|186806|1730	1.25287	1.84485	0	0
k__Bacteria|p__Firmicutes|c__Clostridia|o__Clostridiales|f__Eubacteriaceae|g__Eubacterium|s__Eubacterium_dolichum_CAG_375	2|1239|186801|186802|186806|1730|1263076	0.01316	0.02909	0	0
k__Bacteria|p__Firmicutes|c__Clostridia|o__Clostridiales|f__Eubacteriaceae|g__Eubacterium|s__Eubacterium_hallii	2|1239|186801|186802|186806|1730|39488	0.41769	0.53533	0	0
k__Bacteria|p__Firmicutes|c__Clostridia|o__Clostridiales|f__Eubacteriaceae|g__Eubacterium|s__Eubacterium_ramulus	2|1239|186801|186802|186806|1730|39490	0.21883	0.4159	0	0
k__Bacteria|p__Firmicutes|c__Clostridia|o__Clostridiales|f__Eubacteriaceae|g__Eubacterium|s__Eubacterium_sp_CAG_251	2|1239|186801|186802|186806|1730|1262886	0.41784	0.61031	0	0
k__Bacteria|p__Firmicutes|c__Clostridia|o__Clostridiales|f__Eubacteriaceae|g__Eubacterium|s__Eubacterium_sp_CAG_274	2|1239|186801|186802|186806|1730|1262888	0.18233	0.25183	0	0
k__Bacteria|p__Firmicutes|c__Clostridia|o__Clostridiales|f__Eubacteriaceae|g__Eubacterium|s__Eubacterium_ventriosum	2|1239|186801|186802|186806|1730|39496	0.00302	0.00238	0	0
k__Bacteria|p__Firmicutes|c__Clostridia|o__Clostridiales|f__Lachnospiraceae	2|1239|186801|186802|186803	13.2951	22.636	0	0
k__Bacteria|p__Firmicutes|c__Clostridia|o__Clostridiales|f__Lachnospiraceae|g__Anaerostipes	2|1239|186801|186802|186803|207244	0.16893	0.3397	0	0
k__Bacteria|p__Firmicutes|c__Clostridia|o__Clostridiales|f__Lachnospiraceae|g__Anaerostipes|s__Anaerostipes_hadrus	2|1239|186801|186802|186803|207244|649756	0.16893	0.3397	0	0
k__Bacteria|p__Firmicutes|c__Clostridia|o__Clostridiales|f__Lachnospiraceae|g__Blautia	2|1239|186801|186802|186803|572511	3.82112	6.99785	0	0
k__Bacteria|p__Firmicutes|c__Clostridia|o__Clostridiales|f__Lachnospiraceae|g__Blautia|s__Blautia_hydrogenotrophica	2|1239|186801|186802|186803|572511|53443	0.00334	0.00048	0	0
k__Bacteria|p__Firmicutes|c__Clostridia|o__Clostridiales|f__Lachnospiraceae|g__Blautia|s__Blautia_obeum	2|1239|186801|186802|186803|572511|40520	0.49822	0.85228	0	0
k__Bacteria|p__Firmicutes|c__Clostridia|o__Clostridiales|f__Lachnospiraceae|g__Blautia|s__Blautia_sp_CAG_257	2|1239|186801|186802|186803|572511|1262756	0.09553	0.15142	0	0
k__Bacteria|p__Firmicutes|c__Clostridia|o__Clostridiales|f__Lachnospiraceae|g__Blautia|s__Blautia_wexlerae	2|1239|186801|186802|186803|572511|418240	0.11945	0.14266	0	0
k__Bacteria|p__Firmicutes|c__Clostridia|o__Clostridiales|f__Lachnospiraceae|g__Blautia|s__Ruminococcus_gnavus	2|1239|186801|186802|186803|572511|33038	0.0051	0.00486	0	0
k__Bacteria|p__Firmicutes|c__Clostridia|o__Clostridiales|f__Lachnospiraceae|g__Blautia|s__Ruminococcus_torques	2|1239|186801|186802|186803|572511|33039	3.09947	5.84615	0	0
k__Bacteria|p__Firmicutes|c__Clostridia|o__Clostridiales|f__Lachnospiraceae|g__Coprococcus	2|1239|186801|186802|186803|33042	0.25745	0.49991	0	0
k__Bacteria|p__Firmicutes|c__Clostridia|o__Clostridiales|f__Lachnospiraceae|g__Coprococcus|s__Coprococcus_catus	2|1239|186801|186802|186803|33042|116085	0.25745	0.49991	0	0
k__Bacteria|p__Firmicutes|c__Clostridia|o__Clostridiales|f__Lachnospiraceae|g__Dorea	2|1239|186801|186802|186803|189330	2.65116	3.66138	0	0
k__Bacteria|p__Firmicutes|c__Clostridia|o__Clostridiales|f__Lachnospiraceae|g__Dorea|s__Dorea_formicigenerans	2|1239|186801|186802|186803|189330|39486	1.10639	1.88908	0	0
k__Bacteria|p__Firmicutes|c__Clostridia|o__Clostridiales|f__Lachnospiraceae|g__Dorea|s__Dorea_longicatena	2|1239|186801|186802|186803|189330|88431	1.52018	1.73228	0	0
k__Bacteria|p__Firmicutes|c__Clostridia|o__Clostridiales|f__Lachnospiraceae|g__Dorea|s__Dorea_sp_CAG_317	2|1239|186801|186802|186803|189330|1262873	0.02459	0.04002	0	0
k__Bacteria|p__Firmicutes|c__Clostridia|o__Clostridiales|f__Lachnospiraceae|g__Eisenbergiella	2|1239|186801|186802|186803|1432051	0.00083	0.00146	0	0
k__Bacteria|p__Firmicutes|c__Clostridia|o__Clostridiales|f__Lachnospiraceae|g__Eisenbergiella|s__Eisenbergiella_massiliensis	2|1239|186801|186802|186803|1432051|1720294	0.00083	0.00146	0	0
k__Bacteria|p__Firmicutes|c__Clostridia|o__Clostridiales|f__Lachnospiraceae|g__Fusicatenibacter	2|1239|186801|186802|186803|1407607	0.39908	0.71158	0	0
k__Bacteria|p__Firmicutes|c__Clostridia|o__Clostridiales|f__Lachnospiraceae|g__Fusicatenibacter|s__Fusicatenibacter_saccharivorans	2|1239|186801|186802|186803|1407607|1150298	0.39908	0.71158	0	0
k__Bacteria|p__Firmicutes|c__Clostridia|o__Clostridiales|f__Lachnospiraceae|g__Lachnoclostridium	2|1239|186801|186802|186803|1506553	0.06719	0.08511	0	0
k__Bacteria|p__Firmicutes|c__Clostridia|o__Clostridiales|f__Lachnospiraceae|g__Lachnoclostridium|s__Clostridium_asparagiforme	2|1239|186801|186802|186803|1506553|333367	0.03046	0.01482	0	0
k__Bacteria|p__Firmicutes|c__Clostridia|o__Clostridiales|f__Lachnospiraceae|g__Lachnoclostridium|s__Clostridium_bolteae	2|1239|186801|186802|186803|1506553|208479	0.01085	0.03967	0	0
k__Bacteria|p__Firmicutes|c__Clostridia|o__Clostridiales|f__Lachnospiraceae|g__Lachnoclostridium|s__Clostridium_citroniae	2|1239|186801|186802|186803|1506553|358743	0.01527	0.02671	0	0
k__Bacteria|p__Firmicutes|c__Clostridia|o__Clostridiales|f__Lachnospiraceae|g__Lachnoclostridium|s__Clostridium_clostridioforme	2|1239|186801|186802|186803|1506553|1531	0.00182	0	0	0
k__Bacteria|p__Firmicutes|c__Clostridia|o__Clostridiales|f__Lachnospiraceae|g__Lachnoclostridium|s__Clostridium_lavalense	2|1239|186801|186802|186803|1506553|460384	0.00116	0	0	0
k__Bacteria|p__Firmicutes|c__Clostridia|o__Clostridiales|f__Lachnospiraceae|g__Lachnoclostridium|s__Clostridium_saccharolyticum	2|1239|186801|186802|186803|1506553|84030	0.00041	0	0	0
k__Bacteria|p__Firmicutes|c__Clostridia|o__Clostridiales|f__Lachnospiraceae|g__Lachnoclostridium|s__Clostridium_symbiosum	2|1239|186801|186802|186803|1506553|1512	0.00722	0.00391	0	0
k__Bacteria|p__Firmicutes|c__Clostridia|o__Clostridiales|f__Lachnospiraceae|g__Lachnospira	2|1239|186801|186802|186803|28050	2.47533	3.72092	0	0
k__Bacteria|p__Firmicutes|c__Clostridia|o__Clostridiales|f__Lachnospiraceae|g__Lachnospiraceae_unclassified		1.50406	2.67829	0	0
k__Bacteria|p__Firmicutes|c__Clostridia|o__Clostridiales|f__Lachnospiraceae|g__Lachnospiraceae_unclassified|s__Eubacterium_rectale	2|1239|186801|186802|186803||39491	1.50406	2.67829	0	0
k__Bacteria|p__Firmicutes|c__Clostridia|o__Clostridiales|f__Lachnospiraceae|g__Lachnospira|s__Lachnospira_pectinoschiza	2|1239|186801|186802|186803|28050|28052	2.47533	3.72092	0	0
k__Bacteria|p__Firmicutes|c__Clostridia|o__Clostridiales|f__Lachnospiraceae|g__Oribacterium	2|1239|186801|186802|186803|265975	0.00048	0	0	0
k__Bacteria|p__Firmicutes|c__Clostridia|o__Clostridiales|f__Lachnospiraceae|g__Oribacterium|s__Oribacterium_sinus	2|1239|186801|186802|186803|265975|237576	0.00048	0	0	0
k__Bacteria|p__Firmicutes|c__Clostridia|o__Clostridiales|f__Lachnospiraceae|g__Roseburia	2|1239|186801|186802|186803|841	1.94949	3.93978	0	0
k__Bacteria|p__Firmicutes|c__Clostridia|o__Clostridiales|f__Lachnospiraceae|g__Roseburia|s__Roseburia_faecis	2|1239|186801|186802|186803|841|301302	1.81534	3.87342	0	0
k__Bacteria|p__Firmicutes|c__Clostridia|o__Clostridiales|f__Lachnospiraceae|g__Roseburia|s__Roseburia_hominis	2|1239|186801|186802|186803|841|301301	0.05151	0.02831	0	0
k__Bacteria|p__Firmicutes|c__Clostridia|o__Clostridiales|f__Lachnospiraceae|g__Roseburia|s__Roseburia_intestinalis	2|1239|186801|186802|186803|841|166486	0.00193	0	0	0
k__Bacteria|p__Firmicutes|c__Clostridia|o__Clostridiales|f__Lachnospiraceae|g__Roseburia|s__Roseburia_inulinivorans	2|1239|186801|186802|186803|841|360807	0.07994	0.03729	0	0
k__Bacteria|p__Firmicutes|c__Clostridia|o__Clostridiales|f__Lachnospiraceae|g__Roseburia|s__Roseburia_sp_CAG_471	2|1239|186801|186802|186803|841|1262948	0.00078	0.00076	0	0
k__Bacteria|p__Firmicutes|c__Clostridia|o__Clostridiales|f__Ruminococcaceae	2|1239|186801|186802|541000	4.71919	6.17064	0	67.0037
k__Bacteria|p__Firmicutes|c__Clostridia|o__Clostridiales|f__Ruminococcaceae|g__Agathobaculum	2|1239|186801|186802|541000|2048137	0.35949	0.66437	0	0
k__Bacteria|p__Firmicutes|c__Clostridia|o__Clostridiales|f__Ruminococcaceae|g__Agathobaculum|s__Agathobaculum_butyriciproducens	2|1239|186801|186802|541000|2048137|1628085	0.35949	0.66437	0	0
k__Bacteria|p__Firmicutes|c__Clostridia|o__Clostridiales|f__Ruminococcaceae|g__Anaerotruncus	2|1239|186801|186802|541000|244127	0.00368	0.00136	0	0
k__Bacteria|p__Firmicutes|c__Clostridia|o__Clostridiales|f__Ruminococcaceae|g__Anaerotruncus|s__Anaerotruncus_colihominis	2|1239|186801|186802|541000|244127|169435	0.00368	0.00136	0	0
k__Bacteria|p__Firmicutes|c__Clostridia|o__Clostridiales|f__Ruminococcaceae|g__Faecalibacterium	2|1239|186801|186802|541000|216851	4.06238	4.60117	0	67.0037
k__Bacteria|p__Firmicutes|c__Clostridia|o__Clostridiales|f__Ruminococcaceae|g__Faecalibacterium|s__Faecalibacterium_prausnitzii	2|1239|186801|186802|541000|216851|853	4.06238	4.60117	0	67.0037
k__Bacteria|p__Firmicutes|c__Clostridia|o__Clostridiales|f__Ruminococcaceae|g__Flavonifractor	2|1239|186801|186802|541000|946234	0.08805	0.15862	0	0
k__Bacteria|p__Firmicutes|c__Clostridia|o__Clostridiales|f__Ruminococcaceae|g__Flavonifractor|s__Flavonifractor_plautii	2|1239|186801|186802|541000|946234|292800	0.08805	0.15862	0	0
k__Bacteria|p__Firmicutes|c__Clostridia|o__Clostridiales|f__Ruminococcaceae|g__Gemmiger	2|1239|186801|186802|541000|204475	0.13678	0.25807	0	0
k__Bacteria|p__Firmicutes|c__Clostridia|o__Clostridiales|f__Ruminococcaceae|g__Gemmiger|s__Gemmiger_formicilis	2|1239|186801|186802|541000|204475|745368	0.13678	0.25807	0	0
k__Bacteria|p__Firmicutes|c__Clostridia|o__Clostridiales|f__Ruminococcaceae|g__Ruminococcaceae_unclassified		0.00228	0.00013	0	0
k__Bacteria|p__Firmicutes|c__Clostridia|o__Clostridiales|f__Ruminococcaceae|g__Ruminococcaceae_unclassified|s__Clostridium_leptum	2|1239|186801|186802|541000||1535	0.00087	0	0	0
k__Bacteria|p__Firmicutes|c__Clostridia|o__Clostridiales|f__Ruminococcaceae|g__Ruminococcaceae_unclassified|s__Ruminococcaceae_bacterium_D16	2|1239|186801|186802|541000||552398	0.0014	0.00013	0	0
k__Bacteria|p__Firmicutes|c__Clostridia|o__Clostridiales|f__Ruminococcaceae|g__Ruminococcus	2|1239|186801|186802|541000|1263	0.02662	0.42276	0	0
k__Bacteria|p__Firmicutes|c__Clostridia|o__Clostridiales|f__Ruminococcaceae|g__Ruminococcus|s__Ruminococcus_callidus	2|1239|186801|186802|541000|1263|40519	0.02662	0.42276	0	0
k__Bacteria|p__Firmicutes|c__Clostridia|o__Clostridiales|f__Ruminococcaceae|g__Ruthenibacterium	2|1239|186801|186802|541000|1905344	0.03991	0.06417	0	0
k__Bacteria|p__Firmicutes|c__Clostridia|o__Clostridiales|f__Ruminococcaceae|g__Ruthenibacterium|s__Ruthenibacterium_lactatiformans	2|1239|186801|186802|541000|1905344|1550024	0.03991	0.06417	0	0
k__Bacteria|p__Firmicutes|c__Erysipelotrichia	2|1239|526524	0.01465	0.05261	0	0
k__Bacteria|p__Firmicutes|c__Erysipelotrichia|o__Erysipelotrichales	2|1239|526524|526525	0.01465	0.05261	0	0
k__Bacteria|p__Firmicutes|c__Erysipelotrichia|o__Erysipelotrichales|f__Erysipelotrichaceae	2|1239|526524|526525|128827	0.01465	0.05261	0	0
k__Bacteria|p__Firmicutes|c__Erysipelotrichia|o__Erysipelotrichales|f__Erysipelotrichaceae|g__Absiella	2|1239|526524|526525|128827|2057233	0.01071	0.03371	0	0
k__Bacteria|p__Firmicutes|c__Erysipelotrichia|o__Erysipelotrichales|f__Erysipelotrichaceae|g__Absiella|s__Absiella_dolichum	2|1239|526524|526525|128827|2057233|31971	0.01071	0.03371	0	0
k__Bacteria|p__Firmicutes|c__Erysipelotrichia|o__Erysipelotrichales|f__Erysipelotrichaceae|g__Dielma	2|1239|526524|526525|128827|1472649	0.00116	0.0189	0	0
k__Bacteria|p__Firmicutes|c__Erysipelotrichia|o__Erysipelotrichales|f__Erysipelotrichaceae|g__Dielma|s__Dielma_fastidiosa	2|1239|526524|526525|128827|1472649|1034346	0.00116	0.0189	0	0
k__Bacteria|p__Firmicutes|c__Erysipelotrichia|o__Erysipelotrichales|f__Erysipelotrichaceae|g__Erysipelatoclostridium	2|1239|526524|526525|128827|1505663	0.00277	0	0	0
k__Bacteria|p__Firmicutes|c__Erysipelotrichia|o__Erysipelotrichales|f__Erysipelotrichaceae|g__Erysipelatoclostridium|s__Clostridium_innocuum	2|1239|526524|526525|128827|1505663|1522	0.00066	0	0	0
k__Bacteria|p__Firmicutes|c__Erysipelotrichia|o__Erysipelotrichales|f__Erysipelotrichaceae|g__Erysipelatoclostridium|s__Erysipelatoclostridium_ramosum	2|1239|526524|526525|128827|1505663|1547	0.00211	0	0	0
k__Bacteria|p__Firmicutes|c__Firmicutes_unclassified		0.42857	0.43942	0	0
k__Bacteria|p__Firmicutes|c__Firmicutes_unclassified|o__Firmicutes_unclassified		0.42857	0.43942	0	0
k__Bacteria|p__Firmicutes|c__Firmicutes_unclassified|o__Firmicutes_unclassified|f__Firmicutes_unclassified		0.42857	0.43942	0	0
k__Bacteria|p__Firmicutes|c__Firmicutes_unclassified|o__Firmicutes_unclassified|f__Firmicutes_unclassified|g__Firmicutes_unclassified		0.42857	0.43942	0	0
k__Bacteria|p__Firmicutes|c__Firmicutes_unclassified|o__Firmicutes_unclassified|f__Firmicutes_unclassified|g__Firmicutes_unclassified|s__Firmicutes_bacterium_CAG_424	2|1239|||||1263022	0.00026	0	0	0
k__Bacteria|p__Firmicutes|c__Firmicutes_unclassified|o__Firmicutes_unclassified|f__Firmicutes_unclassified|g__Firmicutes_unclassified|s__Firmicutes_bacterium_CAG_83	2|1239|||||1262992	0.42831	0.43942	0	0
k__Bacteria|p__Firmicutes|c__Negativicutes	2|1239|909932	4.0085	6.18168	0	0
k__Bacteria|p__Firmicutes|c__Negativicutes|o__Acidaminococcales	2|1239|909932|1843488	1.73053	2.63507	0	0
k__Bacteria|p__Firmicutes|c__Negativicutes|o__Acidaminococcales|f__Acidaminococcaceae	2|1239|909932|1843488|909930	1.73053	2.63507	0	0
k__Bacteria|p__Firmicutes|c__Negativicutes|o__Acidaminococcales|f__Acidaminococcaceae|g__Acidaminococcus	2|1239|909932|1843488|909930|904	1.1636	1.66137	0	0
k__Bacteria|p__Firmicutes|c__Negativicutes|o__Acidaminococcales|f__Acidaminococcaceae|g__Acidaminococcus|s__Acidaminococcus_intestini	2|1239|909932|1843488|909930|904|187327	1.1636	1.66137	0	0
k__Bacteria|p__Firmicutes|c__Negativicutes|o__Acidaminococcales|f__Acidaminococcaceae|g__Phascolarctobacterium	2|1239|909932|1843488|909930|33024	0.56693	0.9737	0	0
k__Bacteria|p__Firmicutes|c__Negativicutes|o__Acidaminococcales|f__Acidaminococcaceae|g__Phascolarctobacterium|s__Phascolarctobacterium_faecium	2|1239|909932|1843488|909930|33024|33025	0.56693	0.9737	0	0
k__Bacteria|p__Firmicutes|c__Negativicutes|o__Selenomonadales	2|1239|909932|909929	1.60495	2.9923	0	0
k__Bacteria|p__Firmicutes|c__Negativicutes|o__Selenomonadales|f__Selenomonadaceae	2|1239|909932|909929|1843491	1.60495	2.9923	0	0
k__Bacteria|p__Firmicutes|c__Negativicutes|o__Selenomonadales|f__Selenomonadaceae|g__Megamonas	2|1239|909932|909929|1843491|158846	1.60495	2.9923	0	0
k__Bacteria|p__Firmicutes|c__Negativicutes|o__Selenomonadales|f__Selenomonadaceae|g__Megamonas|s__Megamonas_funiformis	2|1239|909932|909929|1843491|158846|437897	0.97086	1.66688	0	0
k__Bacteria|p__Firmicutes|c__Negativicutes|o__Selenomonadales|f__Selenomonadaceae|g__Megamonas|s__Megamonas_funiformis_CAG_377	2|1239|909932|909929|1843491|158846|1263086	0.53404	0.80965	0	0
k__Bacteria|p__Firmicutes|c__Negativicutes|o__Selenomonadales|f__Selenomonadaceae|g__Megamonas|s__Megamonas_hypermegale	2|1239|909932|909929|1843491|158846|158847	0.10004	0.51577	0	0
k__Bacteria|p__Firmicutes|c__Negativicutes|o__Veillonellales	2|1239|909932|1843489	0.67303	0.55431	0	0
k__Bacteria|p__Firmicutes|c__Negativicutes|o__Veillonellales|f__Veillonellaceae	2|1239|909932|1843489|31977	0.67303	0.55431	0	0
k__Bacteria|p__Firmicutes|c__Negativicutes|o__Veillonellales|f__Veillonellaceae|g__Dialister	2|1239|909932|1843489|31977|39948	0.01833	0.03587	0	0
k__Bacteria|p__Firmicutes|c__Negativicutes|o__Veillonellales|f__Veillonellaceae|g__Dialister|s__Dialister_invisus	2|1239|909932|1843489|31977|39948|218538	0.01833	0.03587	0	0
k__Bacteria|p__Firmicutes|c__Negativicutes|o__Veillonellales|f__Veillonellaceae|g__Megasphaera	2|1239|909932|1843489|31977|906	0.06429	0.07289	0	0
k__Bacteria|p__Firmicutes|c__Negativicutes|o__Veillonellales|f__Veillonellaceae|g__Megasphaera|s__Megasphaera_micronuciformis	2|1239|909932|1843489|31977|906|187326	0.00269	0	0	0
k__Bacteria|p__Firmicutes|c__Negativicutes|o__Veillonellales|f__Veillonellaceae|g__Megasphaera|s__Megasphaera_sp_DISK_18	2|1239|909932|1843489|31977|906|1776081	0.06082	0.07277	0	0
k__Bacteria|p__Firmicutes|c__Negativicutes|o__Veillonellales|f__Veillonellaceae|g__Megasphaera|s__Megasphaera_sp_MJR8396C	2|1239|909932|1843489|31977|906|1603888	0.00078	0.00011	0	0
k__Bacteria|p__Firmicutes|c__Negativicutes|o__Veillonellales|f__Veillonellaceae|g__Veillonella	2|1239|909932|1843489|31977|29465	0.59041	0.44555	0	0
k__Bacteria|p__Firmicutes|c__Negativicutes|o__Veillonellales|f__Veillonellaceae|g__Veillonella|s__Veillonella_atypica	2|1239|909932|1843489|31977|29465|39777	0.23518	0.22725	0	0
k__Bacteria|p__Firmicutes|c__Negativicutes|o__Veillonellales|f__Veillonellaceae|g__Veillonella|s__Veillonella_dispar	2|1239|909932|1843489|31977|29465|39778	0.19384	0.14687	0	0
k__Bacteria|p__Firmicutes|c__Negativicutes|o__Veillonellales|f__Veillonellaceae|g__Veillonella|s__Veillonella_infantium	2|1239|909932|1843489|31977|29465|1911679	0.03784	0.02473	0	0
k__Bacteria|p__Firmicutes|c__Negativicutes|o__Veillonellales|f__Veillonellaceae|g__Veillonella|s__Veillonella_parvula	2|1239|909932|1843489|31977|29465|29466	0.11292	0.03058	0	0
k__Bacteria|p__Firmicutes|c__Negativicutes|o__Veillonellales|f__Veillonellaceae|g__Veillonella|s__Veillonella_rodentium	2|1239|909932|1843489|31977|29465|248315	0.00017	0	0	0
k__Bacteria|p__Firmicutes|c__Negativicutes|o__Veillonellales|f__Veillonellaceae|g__Veillonella|s__Veillonella_sp_T11011_6	2|1239|909932|1843489|31977|29465|2027459	0.01046	0.01611	0	0
k__Bacteria|p__Fusobacteria	2|32066	0.01078	0	0	0
k__Bacteria|p__Fusobacteria|c__Fusobacteriia	2|32066|203490	0.01078	0	0	0
k__Bacteria|p__Fusobacteria|c__Fusobacteriia|o__Fusobacteriales	2|32066|203490|203491	0.01078	0	0	0
k__Bacteria|p__Fusobacteria|c__Fusobacteriia|o__Fusobacteriales|f__Fusobacteriaceae	2|32066|203490|203491|203492	0.01078	0	0	0
k__Bacteria|p__Fusobacteria|c__Fusobacteriia|o__Fusobacteriales|f__Fusobacteriaceae|g__Fusobacterium	2|32066|203490|203491|203492|848	0.01078	0	0	0
k__Bacteria|p__Fusobacteria|c__Fusobacteriia|o__Fusobacteriales|f__Fusobacteriaceae|g__Fusobacterium|s__Fusobacterium_periodonticum	2|32066|203490|203491|203492|848|860	0.01078	0	0	0
k__Bacteria|p__Proteobacteria	2|1224	53.8981	31.3655	0	22.5418
k__Bacteria|p__Proteobacteria|c__Betaproteobacteria	2|1224|28216	0.14015	0.19641	0	0
k__Bacteria|p__Proteobacteria|c__Betaproteobacteria|o__Burkholderiales	2|1224|28216|80840	0.14015	0.19641	0	0
k__Bacteria|p__Proteobacteria|c__Betaproteobacteria|o__Burkholderiales|f__Sutterellaceae	2|1224|28216|80840|995019	0.14015	0.19641	0	0
k__Bacteria|p__Proteobacteria|c__Betaproteobacteria|o__Burkholderiales|f__Sutterellaceae|g__Parasutterella	2|1224|28216|80840|995019|577310	0.11926	0.17813	0	0
k__Bacteria|p__Proteobacteria|c__Betaproteobacteria|o__Burkholderiales|f__Sutterellaceae|g__Parasutterella|s__Parasutterella_excrementihominis	2|1224|28216|80840|995019|577310|487175	0.11926	0.17813	0	0
k__Bacteria|p__Proteobacteria|c__Betaproteobacteria|o__Burkholderiales|f__Sutterellaceae|g__Turicimonas	2|1224|28216|80840|995019|1918598	0.02089	0.01828	0	0
k__Bacteria|p__Proteobacteria|c__Betaproteobacteria|o__Burkholderiales|f__Sutterellaceae|g__Turicimonas|s__Turicimonas_muris	2|1224|28216|80840|995019|1918598|1796652	0.02089	0.01828	0	0
k__Bacteria|p__Proteobacteria|c__Deltaproteobacteria	2|1224|28221	0.10119	0.1777	0	0
k__Bacteria|p__Proteobacteria|c__Deltaproteobacteria|o__Desulfovibrionales	2|1224|28221|213115	0.10119	0.1777	0	0
k__Bacteria|p__Proteobacteria|c__Deltaproteobacteria|o__Desulfovibrionales|f__Desulfovibrionaceae	2|1224|28221|213115|194924	0.10119	0.1777	0	0
k__Bacteria|p__Proteobacteria|c__Deltaproteobacteria|o__Desulfovibrionales|f__Desulfovibrionaceae|g__Bilophila	2|1224|28221|213115|194924|35832	0.10119	0.1777	0	0
k__Bacteria|p__Proteobacteria|c__Deltaproteobacteria|o__Desulfovibrionales|f__Desulfovibrionaceae|g__Bilophila|s__Bilophila_wadsworthia	2|1224|28221|213115|194924|35832|35833	0.10119	0.1777	0	0
k__Bacteria|p__Proteobacteria|c__Epsilonproteobacteria	2|1224|29547	0.00747	0	0	0
k__Bacteria|p__Proteobacteria|c__Epsilonproteobacteria|o__Campylobacterales	2|1224|29547|213849	0.00747	0	0	0
k__Bacteria|p__Proteobacteria|c__Epsilonproteobacteria|o__Campylobacterales|f__Campylobacteraceae	2|1224|29547|213849|72294	0.00747	0	0	0
k__Bacteria|p__Proteobacteria|c__Epsilonproteobacteria|o__Campylobacterales|f__Campylobacteraceae|g__Campylobacter	2|1224|29547|213849|72294|194	0.00747	0	0	0
k__Bacteria|p__Proteobacteria|c__Epsilonproteobacteria|o__Campylobacterales|f__Campylobacteraceae|g__Campylobacter|s__Campylobacter_concisus	2|1224|29547|213849|72294|194|199	0.00747	0	0	0
k__Bacteria|p__Proteobacteria|c__Gammaproteobacteria	2|1224|1236	53.6464	30.9892	0	22.5418
k__Bacteria|p__Proteobacteria|c__Gammaproteobacteria|o__Enterobacterales	2|1224|1236|91347	52.9385	30.5663	0	22.5418
k__Bacteria|p__Proteobacteria|c__Gammaproteobacteria|o__Enterobacterales|f__Enterobacteriaceae	2|1224|1236|91347|543	52.9385	30.5663	0	22.5418
k__Bacteria|p__Proteobacteria|c__Gammaproteobacteria|o__Enterobacterales|f__Enterobacteriaceae|g__Cronobacter	2|1224|1236|91347|543|413496	0.1642	0.07363	0	0
k__Bacteria|p__Proteobacteria|c__Gammaproteobacteria|o__Enterobacterales|f__Enterobacteriaceae|g__Cronobacter|s__Cronobacter_malonaticus	2|1224|1236|91347|543|413496|413503	0.0016	0	0	0
k__Bacteria|p__Proteobacteria|c__Gammaproteobacteria|o__Enterobacterales|f__Enterobacteriaceae|g__Cronobacter|s__Cronobacter_sakazakii	2|1224|1236|91347|543|413496|28141	0.1626	0.07363	0	0
k__Bacteria|p__Proteobacteria|c__Gammaproteobacteria|o__Enterobacterales|f__Enterobacteriaceae|g__Klebsiella	2|1224|1236|91347|543|570	52.7732	30.4926	0	22.5418
k__Bacteria|p__Proteobacteria|c__Gammaproteobacteria|o__Enterobacterales|f__Enterobacteriaceae|g__Klebsiella|s__Klebsiella_pneumoniae	2|1224|1236|91347|543|570|573	20.4875	11.853	0	0
k__Bacteria|p__Proteobacteria|c__Gammaproteobacteria|o__Enterobacterales|f__Enterobacteriaceae|g__Klebsiella|s__Klebsiella_quasipneumoniae	2|1224|1236|91347|543|570|1463165	25.9701	14.4066	0	0
k__Bacteria|p__Proteobacteria|c__Gammaproteobacteria|o__Enterobacterales|f__Enterobacteriaceae|g__Klebsiella|s__Klebsiella_variicola	2|1224|1236|91347|543|570|244366	6.31558	4.23312	0	22.5418
k__Bacteria|p__Proteobacteria|c__Gammaproteobacteria|o__Enterobacterales|f__Enterobacteriaceae|g__Raoultella	2|1224|1236|91347|543|160674	0.0011	0	0	0
k__Bacteria|p__Proteobacteria|c__Gammaproteobacteria|o__Enterobacterales|f__Enterobacteriaceae|g__Raoultella|s__Raoultella_ornithinolytica	2|1224|1236|91347|543|160674|54291	0.0011	0	0	0
k__Bacteria|p__Proteobacteria|c__Gammaproteobacteria|o__Pasteurellales	2|1224|1236|135625	0.70175	0.41627	0	0
k__Bacteria|p__Proteobacteria|c__Gammaproteobacteria|o__Pasteurellales|f__Pasteurellaceae	2|1224|1236|135625|712	0.70175	0.41627	0	0
k__Bacteria|p__Proteobacteria|c__Gammaproteobacteria|o__Pasteurellales|f__Pasteurellaceae|g__Haemophilus	2|1224|1236|135625|712|724	0.70175	0.41627	0	0
k__Bacteria|p__Proteobacteria|c__Gammaproteobacteria|o__Pasteurellales|f__Pasteurellaceae|g__Haemophilus|s__Haemophilus_parahaemolyticus	2|1224|1236|135625|712|724|735	0.00833	0.01013	0	0
k__Bacteria|p__Proteobacteria|c__Gammaproteobacteria|o__Pasteurellales|f__Pasteurellaceae|g__Haemophilus|s__Haemophilus_parainfluenzae	2|1224|1236|135625|712|724|729	0.58959	0.3827	0	0
k__Bacteria|p__Proteobacteria|c__Gammaproteobacteria|o__Pasteurellales|f__Pasteurellaceae|g__Haemophilus|s__Haemophilus_paraphrohaemolyticus	2|1224|1236|135625|712|724|736	0.01292	0.00893	0	0
k__Bacteria|p__Proteobacteria|c__Gammaproteobacteria|o__Pasteurellales|f__Pasteurellaceae|g__Haemophilus|s__Haemophilus_sputorum	2|1224|1236|135625|712|724|1078480	0.09091	0.01451	0	0
k__Bacteria|p__Proteobacteria|c__Gammaproteobacteria|o__Pseudomonadales	2|1224|1236|72274	0.00268	0.00324	0	0
k__Bacteria|p__Proteobacteria|c__Gammaproteobacteria|o__Pseudomonadales|f__Pseudomonadaceae	2|1224|1236|72274|135621	0.00268	0.00324	0	0
k__Bacteria|p__Proteobacteria|c__Gammaproteobacteria|o__Pseudomonadales|f__Pseudomonadaceae|g__Pseudomonas	2|1224|1236|72274|135621|286	0.00268	0.00324	0	0
k__Bacteria|p__Proteobacteria|c__Gammaproteobacteria|o__Pseudomonadales|f__Pseudomonadaceae|g__Pseudomonas|s__Pseudomonas_fluorescens_group	2|1224|1236|72274|135621|286|136843	0.00268	0.00324	0	0
k__Bacteria|p__Proteobacteria|c__Gammaproteobacteria|o__Xanthomonadales	2|1224|1236|135614	0.00352	0.00339	0	0
k__Bacteria|p__Proteobacteria|c__Gammaproteobacteria|o__Xanthomonadales|f__Xanthomonadaceae	2|1224|1236|135614|32033	0.00352	0.00339	0	0
k__Bacteria|p__Proteobacteria|c__Gammaproteobacteria|o__Xanthomonadales|f__Xanthomonadaceae|g__Stenotrophomonas	2|1224|1236|135614|32033|40323	0.00352	0	0	0
k__Bacteria|p__Proteobacteria|c__Gammaproteobacteria|o__Xanthomonadales|f__Xanthomonadaceae|g__Stenotrophomonas|s__Stenotrophomonas_maltophilia	2|1224|1236|135614|32033|40323|40324	0.00352	0	0	0
k__Bacteria|p__Proteobacteria|c__Gammaproteobacteria|o__Xanthomonadales|f__Xanthomonadaceae|g__Xanthomonadaceae_unclassified		0	0.00339	0	0
k__Bacteria|p__Proteobacteria|c__Gammaproteobacteria|o__Xanthomonadales|f__Xanthomonadaceae|g__Xanthomonadaceae_unclassified|s__Pseudomonas_geniculata	2|1224|1236|135614|32033||86188	0	0.00339	0	0
k__Bacteria|p__Proteobacteria|c__Proteobacteria_unclassified		0.00287	0.00228	0	0
k__Bacteria|p__Proteobacteria|c__Proteobacteria_unclassified|o__Proteobacteria_unclassified		0.00287	0.00228	0	0
k__Bacteria|p__Proteobacteria|c__Proteobacteria_unclassified|o__Proteobacteria_unclassified|f__Proteobacteria_unclassified		0.00287	0.00228	0	0
k__Bacteria|p__Proteobacteria|c__Proteobacteria_unclassified|o__Proteobacteria_unclassified|f__Proteobacteria_unclassified|g__Proteobacteria_unclassified		0.00287	0.00228	0	0
k__Bacteria|p__Proteobacteria|c__Proteobacteria_unclassified|o__Proteobacteria_unclassified|f__Proteobacteria_unclassified|g__Proteobacteria_unclassified|s__Proteobacteria_bacterium_CAG_139	2|1224|||||1262986	0.00287	0.00228	0	0
k__Bacteria|p__Verrucomicrobia	2|74201	0.26778	0.34802	0	0
k__Bacteria|p__Verrucomicrobia|c__Verrucomicrobiae	2|74201|203494	0.26778	0.34802	0	0
k__Bacteria|p__Verrucomicrobia|c__Verrucomicrobiae|o__Verrucomicrobiales	2|74201|203494|48461	0.26778	0.34802	0	0
k__Bacteria|p__Verrucomicrobia|c__Verrucomicrobiae|o__Verrucomicrobiales|f__Akkermansiaceae	2|74201|203494|48461|1647988	0.26778	0.34802	0	0
k__Bacteria|p__Verrucomicrobia|c__Verrucomicrobiae|o__Verrucomicrobiales|f__Akkermansiaceae|g__Akkermansia	2|74201|203494|48461|1647988|239934	0.26778	0.34802	0	0
k__Bacteria|p__Verrucomicrobia|c__Verrucomicrobiae|o__Verrucomicrobiales|f__Akkermansiaceae|g__Akkermansia|s__Akkermansia_muciniphila	2|74201|203494|48461|1647988|239934|239935	0.26778	0.34802	0	0
k__Eukaryota	2759	0.00018	0	0	0
k__Eukaryota|p__Basidiomycota	2759|5204	0.00018	0	0	0
k__Eukaryota|p__Basidiomycota|c__Malasseziomycetes	2759|5204|1538075	0.00018	0	0	0
k__Eukaryota|p__Basidiomycota|c__Malasseziomycetes|o__Malasseziales	2759|5204|1538075|162474	0.00018	0	0	0
k__Eukaryota|p__Basidiomycota|c__Malasseziomycetes|o__Malasseziales|f__Malasseziaceae	2759|5204|1538075|162474|742845	0.00018	0	0	0
k__Eukaryota|p__Basidiomycota|c__Malasseziomycetes|o__Malasseziales|f__Malasseziaceae|g__Malassezia	2759|5204|1538075|162474|742845|55193	0.00018	0	0	0
k__Eukaryota|p__Basidiomycota|c__Malasseziomycetes|o__Malasseziales|f__Malasseziaceae|g__Malassezia|s__Malassezia_restricta	2759|5204|1538075|162474|742845|55193|76775	0.00018	0	0	0

## Sheet: Fig4A
	Species	All pathways	All gene	Treatment
C1	0	1	835	Control
C2	3	0	621	Control
MEM1	116	357	307563	MEM
MEM2	159	375	293719	MEM

## Sheet: CT18_Pathways
# Pathway	CT18_C1	CT18_C2	CT18_HD1_kneaddata_combined_Abundance	CT18_HD2_kneaddata_combined_bowtie2_aligned_Abundance
UNMAPPED	0.68615	0	0.212668	0.207547
UNINTEGRATED	0.313407	0	0.733415	0.731006
UNINTEGRATED|g__Absiella.s__Absiella_dolichum	0	0	0	0.000262414
UNINTEGRATED|g__Acidaminococcus.s__Acidaminococcus_intestini	0	0	0.00425824	0.00321062
UNINTEGRATED|g__Actinomyces.s__Actinomyces_sp_ICM47	0	0	5.15099e-05	0.000186117
UNINTEGRATED|g__Adlercreutzia.s__Adlercreutzia_equolifaciens	0	0	0.000157819	0.000131184
UNINTEGRATED|g__Agathobaculum.s__Agathobaculum_butyriciproducens	0	0	0.00150247	0.000916661
UNINTEGRATED|g__Akkermansia.s__Akkermansia_muciniphila	0	0	0.00336024	0.00269305
UNINTEGRATED|g__Alistipes.s__Alistipes_finegoldii	0	0	0.0032143	0.00206433
UNINTEGRATED|g__Alistipes.s__Alistipes_putredinis	0	0	0.00840643	0.00308883
UNINTEGRATED|g__Alistipes.s__Alistipes_shahii	0	0	0.0047183	0.00346488
UNINTEGRATED|g__Anaerostipes.s__Anaerostipes_hadrus	0	0	0.00220508	0.00139313
UNINTEGRATED|g__Asaccharobacter.s__Asaccharobacter_celatus	0	0	0.000242661	0.000192448
UNINTEGRATED|g__Bacteroides.s__Bacteroides_cellulosilyticus	0	0	0.0120753	0.00896266
UNINTEGRATED|g__Bacteroides.s__Bacteroides_dorei	0	0	0.0138913	0.0129301
UNINTEGRATED|g__Bacteroides.s__Bacteroides_finegoldii	0	0	0.00177041	0.00174937
UNINTEGRATED|g__Bacteroides.s__Bacteroides_fragilis	0	0	0.0419257	0.032683
UNINTEGRATED|g__Bacteroides.s__Bacteroides_galacturonicus	0	0	0.00269114	0.00208317
UNINTEGRATED|g__Bacteroides.s__Bacteroides_stercoris	0	0	0.00233304	0.00325214
UNINTEGRATED|g__Bacteroides.s__Bacteroides_thetaiotaomicron	0	0	0.00855278	0.00690148
UNINTEGRATED|g__Bacteroides.s__Bacteroides_uniformis	0	0	0.0101499	0.00782918
UNINTEGRATED|g__Bacteroides.s__Bacteroides_vulgatus	0	0	0.0245022	0.024975
UNINTEGRATED|g__Bacteroides.s__Bacteroides_xylanisolvens	0	0	0.00330503	0.00346588
UNINTEGRATED|g__Bifidobacterium.s__Bifidobacterium_longum	0	0	0.00107256	0.000884442
UNINTEGRATED|g__Bilophila.s__Bilophila_wadsworthia	0	0	0.00270723	0.00202953
UNINTEGRATED|g__Blautia.s__Blautia_obeum	0	0	0.0155236	0.0107157
UNINTEGRATED|g__Blautia.s__Blautia_sp_CAG_257	0	0	0.000367968	0.00025708
UNINTEGRATED|g__Blautia.s__Blautia_wexlerae	0	0	0.00479043	0.0034888
UNINTEGRATED|g__Blautia.s__Ruminococcus_torques	0	0	0.0452068	0.0277168
UNINTEGRATED|g__Clostridium.s__Clostridium_bolteae_CAG_59	0	0	0.000128176	0.000136125
UNINTEGRATED|g__Clostridium.s__Clostridium_sp_CAG_58	0	0	0.000487919	0.000390334
UNINTEGRATED|g__Collinsella.s__Collinsella_aerofaciens	0	0	0.001852	0.00135119
UNINTEGRATED|g__Coprococcus.s__Coprococcus_catus	0	0	0.00110627	0.0006662
UNINTEGRATED|g__Cronobacter.s__Cronobacter_sakazakii	0	0	0.000924999	0.00286607
UNINTEGRATED|g__Cutibacterium.s__Cutibacterium_acnes	0	0	0	0.000129263
UNINTEGRATED|g__Dialister.s__Dialister_invisus	0	0	0.00216391	0.00152678
UNINTEGRATED|g__Dorea.s__Dorea_formicigenerans	0	0	0.00832323	0.00572873
UNINTEGRATED|g__Dorea.s__Dorea_longicatena	0	0	0.00701639	0.00450252
UNINTEGRATED|g__Dorea.s__Dorea_sp_CAG_317	0	0	0.00025744	0.000134476
UNINTEGRATED|g__Eggerthella.s__Eggerthella_lenta	0	0	0	5.13091e-05
UNINTEGRATED|g__Eubacterium.s__Eubacterium_dolichum_CAG_375	0	0	0	2.56181e-05
UNINTEGRATED|g__Eubacterium.s__Eubacterium_hallii	0	0	0.0029101	0.00234807
UNINTEGRATED|g__Eubacterium.s__Eubacterium_ramulus	0	0	0.00182593	0.00137452
UNINTEGRATED|g__Eubacterium.s__Eubacterium_sp_CAG_251	0	0	0.000772808	0.000674868
UNINTEGRATED|g__Eubacterium.s__Eubacterium_sp_CAG_274	0	0	0.0007875	0.000574648
UNINTEGRATED|g__Faecalibacterium.s__Faecalibacterium_prausnitzii	0	0	0.0214189	0.0187971
UNINTEGRATED|g__Firmicutes_unclassified.s__Firmicutes_bacterium_CAG_83	0	0	0.000665061	0.000708483
UNINTEGRATED|g__Flavonifractor.s__Flavonifractor_plautii	0	0	0.00164958	0.00101629
UNINTEGRATED|g__Fusicatenibacter.s__Fusicatenibacter_saccharivorans	0	0	0.00336372	0.00238852
UNINTEGRATED|g__Fusobacterium.s__Fusobacterium_periodonticum	0	0	0	6.16195e-05
UNINTEGRATED|g__Gemmiger.s__Gemmiger_formicilis	0	0	0.00262498	0.00170278
UNINTEGRATED|g__Gordonibacter.s__Gordonibacter_pamelaeae	0	0	1.51785e-05	1.35399e-05
UNINTEGRATED|g__Haemophilus.s__Haemophilus_parahaemolyticus	0	0	6.85976e-05	3.23679e-05
UNINTEGRATED|g__Haemophilus.s__Haemophilus_parainfluenzae	0	0	0.00244368	0.00479952
UNINTEGRATED|g__Haemophilus.s__Haemophilus_paraphrohaemolyticus	0	0	0.000163959	0.000185867
UNINTEGRATED|g__Haemophilus.s__Haemophilus_sputorum	0	0	0.000185475	0.000311754
UNINTEGRATED|g__Intestinimonas.s__Intestinimonas_butyriciproducens	0	0	0.000186034	0.000275418
UNINTEGRATED|g__Klebsiella.s__Klebsiella_pneumoniae	0	0	0.0619388	0.109669
UNINTEGRATED|g__Klebsiella.s__Klebsiella_quasipneumoniae	0	0	0.0628003	0.114272
UNINTEGRATED|g__Klebsiella.s__Klebsiella_variicola	0	0	0.0176448	0.0300101
UNINTEGRATED|g__Lachnoclostridium.s__Clostridium_asparagiforme	0	0	0.000265928	0.000363249
UNINTEGRATED|g__Lachnoclostridium.s__Clostridium_bolteae	0	0	0.00101535	0.000811508
UNINTEGRATED|g__Lachnoclostridium.s__Clostridium_citroniae	0	0	0.000488006	0.000502033
UNINTEGRATED|g__Lachnospira.s__Lachnospira_pectinoschiza	0	0	0.00299022	0.00214616
UNINTEGRATED|g__Lachnospiraceae_unclassified.s__Eubacterium_rectale	0	0	0.010141	0.00656085
UNINTEGRATED|g__Lactobacillus.s__Lactobacillus_fermentum	0	0	0.000294786	0.000262973
UNINTEGRATED|g__Lactobacillus.s__Lactobacillus_rogosae	0	0	0.00240858	0.00175324
UNINTEGRATED|g__Lawsonibacter.s__Lawsonibacter_asaccharolyticus	0	0	0	0.000350804
UNINTEGRATED|g__Megamonas.s__Megamonas_funiformis	0	0	0.00291748	0.00202921
UNINTEGRATED|g__Megamonas.s__Megamonas_funiformis_CAG_377	0	0	0.00440845	0.00298909
UNINTEGRATED|g__Megamonas.s__Megamonas_hypermegale	0	0	0.00261511	0.00153915
UNINTEGRATED|g__Megasphaera.s__Megasphaera_sp_DISK_18	0	0	0.0016938	0.00136079
UNINTEGRATED|g__Monoglobus.s__Monoglobus_pectinilyticus	0	0	0	0.000124798
UNINTEGRATED|g__Odoribacter.s__Odoribacter_splanchnicus	0	0	0.00234794	0.00216021
UNINTEGRATED|g__Parabacteroides.s__Parabacteroides_distasonis	0	0	0.0108256	0.00754428
UNINTEGRATED|g__Parabacteroides.s__Parabacteroides_merdae	0	0	0.00859958	0.00774349
UNINTEGRATED|g__Parasutterella.s__Parasutterella_excrementihominis	0	0	0.000549191	0.000505862
UNINTEGRATED|g__Pedobacter.s__Pedobacter_nutrimenti	0	0	0	1.83888e-05
UNINTEGRATED|g__Phascolarctobacterium.s__Phascolarctobacterium_faecium	0	0	0.00526286	0.00325701
UNINTEGRATED|g__Roseburia.s__Roseburia_faecis	0	0	0.00966958	0.00497427
UNINTEGRATED|g__Roseburia.s__Roseburia_hominis	0	0	0.000600582	0.000495613
UNINTEGRATED|g__Roseburia.s__Roseburia_inulinivorans	0	0	0.00266142	0.00141916
UNINTEGRATED|g__Ruminococcus.s__Ruminococcus_callidus	0	0	0.00540522	0.000478826
UNINTEGRATED|g__Ruthenibacterium.s__Ruthenibacterium_lactatiformans	0	0	0	0.000254131
UNINTEGRATED|g__Streptococcus.s__Streptococcus_mitis	0	0	2.46422e-05	0.000125031
UNINTEGRATED|g__Streptococcus.s__Streptococcus_parasanguinis	0	0	0.000679998	0.000821251
UNINTEGRATED|g__Streptococcus.s__Streptococcus_salivarius	0	0	0.00531909	0.00646768
UNINTEGRATED|g__Turicimonas.s__Turicimonas_muris	0	0	0	5.60498e-05
UNINTEGRATED|g__Veillonella.s__Veillonella_atypica	0	0	0.000535139	0.000614334
UNINTEGRATED|g__Veillonella.s__Veillonella_dispar	0	0	0.000331163	0.00039065
UNINTEGRATED|g__Veillonella.s__Veillonella_infantium	0	0	0.000211949	0.000261801
UNINTEGRATED|g__Veillonella.s__Veillonella_parvula	0	0	4.78314e-05	0.000195245
UNINTEGRATED|g__Veillonella.s__Veillonella_sp_T11011_6	0	0	0.000130028	0.000145778
UNINTEGRATED|unclassified	0	0	0.0308431	0
1CMET2-PWY: folate transformations III (E. coli)	0	0	0.000346369	0.000331875
1CMET2-PWY: folate transformations III (E. coli)|g__Akkermansia.s__Akkermansia_muciniphila	0	0	1.80241e-06	1.49426e-06
1CMET2-PWY: folate transformations III (E. coli)|g__Alistipes.s__Alistipes_finegoldii	0	0	2.46152e-06	1.37568e-06
1CMET2-PWY: folate transformations III (E. coli)|g__Alistipes.s__Alistipes_putredinis	0	0	1.07643e-05	3.60787e-06
1CMET2-PWY: folate transformations III (E. coli)|g__Anaerostipes.s__Anaerostipes_hadrus	0	0	9.14047e-07	6.15706e-07
1CMET2-PWY: folate transformations III (E. coli)|g__Bacteroides.s__Bacteroides_cellulosilyticus	0	0	1.40761e-05	1.14075e-05
1CMET2-PWY: folate transformations III (E. coli)|g__Bacteroides.s__Bacteroides_dorei	0	0	6.59514e-06	6.59096e-06
1CMET2-PWY: folate transformations III (E. coli)|g__Bacteroides.s__Bacteroides_finegoldii	0	0	4.02451e-07	6.12291e-07
1CMET2-PWY: folate transformations III (E. coli)|g__Bacteroides.s__Bacteroides_fragilis	0	0	9.90808e-06	7.80272e-06
1CMET2-PWY: folate transformations III (E. coli)|g__Bacteroides.s__Bacteroides_stercoris	0	0	8.07616e-07	1.66711e-06
1CMET2-PWY: folate transformations III (E. coli)|g__Bacteroides.s__Bacteroides_thetaiotaomicron	0	0	3.65352e-06	3.00531e-06
1CMET2-PWY: folate transformations III (E. coli)|g__Bacteroides.s__Bacteroides_uniformis	0	0	3.58861e-06	2.39447e-06
1CMET2-PWY: folate transformations III (E. coli)|g__Bacteroides.s__Bacteroides_vulgatus	0	0	1.42004e-05	1.62131e-05
1CMET2-PWY: folate transformations III (E. coli)|g__Bacteroides.s__Bacteroides_xylanisolvens	0	0	9.01017e-07	1.21568e-06
1CMET2-PWY: folate transformations III (E. coli)|g__Bifidobacterium.s__Bifidobacterium_longum	0	0	3.36194e-07	4.94429e-07
1CMET2-PWY: folate transformations III (E. coli)|g__Blautia.s__Blautia_obeum	0	0	6.88821e-06	4.25897e-06
1CMET2-PWY: folate transformations III (E. coli)|g__Blautia.s__Blautia_sp_CAG_257	0	0	0	2.70741e-07
1CMET2-PWY: folate transformations III (E. coli)|g__Blautia.s__Blautia_wexlerae	0	0	0	8.84843e-08
1CMET2-PWY: folate transformations III (E. coli)|g__Blautia.s__Ruminococcus_torques	0	0	4.23583e-05	2.61398e-05
1CMET2-PWY: folate transformations III (E. coli)|g__Clostridium.s__Clostridium_bolteae_CAG_59	0	0	0	5.00835e-08
1CMET2-PWY: folate transformations III (E. coli)|g__Coprococcus.s__Coprococcus_catus	0	0	1.24631e-06	6.79928e-07
1CMET2-PWY: folate transformations III (E. coli)|g__Cronobacter.s__Cronobacter_sakazakii	0	0	1.86009e-07	5.64961e-07
1CMET2-PWY: folate transformations III (E. coli)|g__Dorea.s__Dorea_formicigenerans	0	0	4.99156e-06	3.32178e-06
1CMET2-PWY: folate transformations III (E. coli)|g__Dorea.s__Dorea_longicatena	0	0	3.58842e-06	2.97252e-06
1CMET2-PWY: folate transformations III (E. coli)|g__Eubacterium.s__Eubacterium_hallii	0	0	1.56316e-06	1.15338e-06
1CMET2-PWY: folate transformations III (E. coli)|g__Eubacterium.s__Eubacterium_sp_CAG_251	0	0	1.59556e-06	1.29523e-06
1CMET2-PWY: folate transformations III (E. coli)|g__Haemophilus.s__Haemophilus_parahaemolyticus	0	0	0	2.50676e-08
1CMET2-PWY: folate transformations III (E. coli)|g__Haemophilus.s__Haemophilus_parainfluenzae	0	0	2.94141e-06	5.71822e-06
1CMET2-PWY: folate transformations III (E. coli)|g__Haemophilus.s__Haemophilus_sputorum	0	0	0	4.77816e-07
1CMET2-PWY: folate transformations III (E. coli)|g__Intestinimonas.s__Intestinimonas_butyriciproducens	0	0	0	1.62759e-07
1CMET2-PWY: folate transformations III (E. coli)|g__Klebsiella.s__Klebsiella_pneumoniae	0	0	1.36396e-05	2.13087e-05
1CMET2-PWY: folate transformations III (E. coli)|g__Klebsiella.s__Klebsiella_quasipneumoniae	0	0	4.08179e-05	7.75287e-05
1CMET2-PWY: folate transformations III (E. coli)|g__Klebsiella.s__Klebsiella_variicola	0	0	6.58702e-06	1.15009e-05
1CMET2-PWY: folate transformations III (E. coli)|g__Lachnoclostridium.s__Clostridium_bolteae	0	0	0	7.70213e-08
1CMET2-PWY: folate transformations III (E. coli)|g__Lachnospiraceae_unclassified.s__Eubacterium_rectale	0	0	7.8814e-07	4.34021e-07
1CMET2-PWY: folate transformations III (E. coli)|g__Lawsonibacter.s__Lawsonibacter_asaccharolyticus	0	0	0	2.38187e-07
1CMET2-PWY: folate transformations III (E. coli)|g__Odoribacter.s__Odoribacter_splanchnicus	0	0	1.69864e-06	1.44513e-06
1CMET2-PWY: folate transformations III (E. coli)|g__Parabacteroides.s__Parabacteroides_distasonis	0	0	3.89912e-06	2.68204e-06
1CMET2-PWY: folate transformations III (E. coli)|g__Parabacteroides.s__Parabacteroides_merdae	0	0	4.53302e-06	4.06212e-06
1CMET2-PWY: folate transformations III (E. coli)|g__Roseburia.s__Roseburia_faecis	0	0	9.82882e-06	5.01768e-06
1CMET2-PWY: folate transformations III (E. coli)|g__Roseburia.s__Roseburia_hominis	0	0	0	8.10989e-08
1CMET2-PWY: folate transformations III (E. coli)|g__Roseburia.s__Roseburia_inulinivorans	0	0	0	1.71482e-07
1CMET2-PWY: folate transformations III (E. coli)|g__Streptococcus.s__Streptococcus_mitis	0	0	0	5.45277e-08
1CMET2-PWY: folate transformations III (E. coli)|g__Streptococcus.s__Streptococcus_parasanguinis	0	0	5.95195e-07	7.39958e-07
1CMET2-PWY: folate transformations III (E. coli)|g__Streptococcus.s__Streptococcus_salivarius	0	0	3.97246e-06	5.5378e-06
1CMET2-PWY: folate transformations III (E. coli)|g__Veillonella.s__Veillonella_atypica	0	0	5.22596e-07	7.27839e-07
1CMET2-PWY: folate transformations III (E. coli)|g__Veillonella.s__Veillonella_dispar	0	0	0	2.42995e-07
1CMET2-PWY: folate transformations III (E. coli)|g__Veillonella.s__Veillonella_infantium	0	0	0	4.37438e-08
1CMET2-PWY: folate transformations III (E. coli)|g__Veillonella.s__Veillonella_parvula	0	0	0	2.15416e-07
1CMET2-PWY: folate transformations III (E. coli)|unclassified	0	0	2.12715e-05	0
3-HYDROXYPHENYLACETATE-DEGRADATION-PWY: 4-hydroxyphenylacetate degradation	0	0	1.76944e-06	3.32715e-07
3-HYDROXYPHENYLACETATE-DEGRADATION-PWY: 4-hydroxyphenylacetate degradation|g__Klebsiella.s__Klebsiella_pneumoniae	0	0	1.25094e-06	3.21155e-07
ALLANTOINDEG-PWY: superpathway of allantoin degradation in yeast	0	0	1.67559e-06	4.99954e-06
ALLANTOINDEG-PWY: superpathway of allantoin degradation in yeast|g__Klebsiella.s__Klebsiella_pneumoniae	0	0	8.06005e-07	2.04806e-06
ANAEROFRUCAT-PWY: homolactic fermentation	0	0	0.000303811	0.000330842
ANAEROFRUCAT-PWY: homolactic fermentation|g__Cronobacter.s__Cronobacter_sakazakii	0	0	0	5.53439e-07
ANAEROFRUCAT-PWY: homolactic fermentation|g__Haemophilus.s__Haemophilus_parahaemolyticus	0	0	0	7.52227e-08
ANAEROFRUCAT-PWY: homolactic fermentation|g__Klebsiella.s__Klebsiella_pneumoniae	0	0	2.65447e-05	4.84102e-05
ANAEROFRUCAT-PWY: homolactic fermentation|g__Klebsiella.s__Klebsiella_quasipneumoniae	0	0	3.36266e-05	6.38062e-05
ANAEROFRUCAT-PWY: homolactic fermentation|g__Klebsiella.s__Klebsiella_variicola	0	0	6.77009e-06	1.34176e-05
ANAEROFRUCAT-PWY: homolactic fermentation|g__Streptococcus.s__Streptococcus_salivarius	0	0	0	4.25393e-08
ANAEROFRUCAT-PWY: homolactic fermentation|unclassified	0	0	3.75506e-06	0
ANAGLYCOLYSIS-PWY: glycolysis III (from glucose)	0	0	0.000358555	0.000372035
ANAGLYCOLYSIS-PWY: glycolysis III (from glucose)|g__Actinomyces.s__Actinomyces_sp_ICM47	0	0	0	3.6946e-07
ANAGLYCOLYSIS-PWY: glycolysis III (from glucose)|g__Bacteroides.s__Bacteroides_cellulosilyticus	0	0	1.98205e-06	3.35818e-06
ANAGLYCOLYSIS-PWY: glycolysis III (from glucose)|g__Bacteroides.s__Bacteroides_fragilis	0	0	1.11178e-05	8.63445e-06
ANAGLYCOLYSIS-PWY: glycolysis III (from glucose)|g__Bifidobacterium.s__Bifidobacterium_longum	0	0	4.39334e-07	4.02738e-07
ANAGLYCOLYSIS-PWY: glycolysis III (from glucose)|g__Cronobacter.s__Cronobacter_sakazakii	0	0	2.13337e-07	5.10383e-07
ANAGLYCOLYSIS-PWY: glycolysis III (from glucose)|g__Dorea.s__Dorea_longicatena	0	0	0	4.08254e-07
ANAGLYCOLYSIS-PWY: glycolysis III (from glucose)|g__Haemophilus.s__Haemophilus_parahaemolyticus	0	0	1.24414e-07	9.26511e-08
ANAGLYCOLYSIS-PWY: glycolysis III (from glucose)|g__Haemophilus.s__Haemophilus_parainfluenzae	0	0	3.8766e-06	7.26372e-06
ANAGLYCOLYSIS-PWY: glycolysis III (from glucose)|g__Haemophilus.s__Haemophilus_paraphrohaemolyticus	0	0	0	1.61226e-08
ANAGLYCOLYSIS-PWY: glycolysis III (from glucose)|g__Haemophilus.s__Haemophilus_sputorum	0	0	0	2.3604e-07
ANAGLYCOLYSIS-PWY: glycolysis III (from glucose)|g__Klebsiella.s__Klebsiella_pneumoniae	0	0	3.00171e-05	5.37353e-05
ANAGLYCOLYSIS-PWY: glycolysis III (from glucose)|g__Klebsiella.s__Klebsiella_quasipneumoniae	0	0	3.32194e-05	6.17805e-05
ANAGLYCOLYSIS-PWY: glycolysis III (from glucose)|g__Klebsiella.s__Klebsiella_variicola	0	0	1.15655e-05	2.11906e-05
ANAGLYCOLYSIS-PWY: glycolysis III (from glucose)|g__Parabacteroides.s__Parabacteroides_distasonis	0	0	6.22411e-06	3.61753e-06
ANAGLYCOLYSIS-PWY: glycolysis III (from glucose)|g__Streptococcus.s__Streptococcus_mitis	0	0	1.52495e-07	3.59855e-07
ANAGLYCOLYSIS-PWY: glycolysis III (from glucose)|g__Streptococcus.s__Streptococcus_parasanguinis	0	0	5.05392e-07	1.14785e-06
ANAGLYCOLYSIS-PWY: glycolysis III (from glucose)|g__Streptococcus.s__Streptococcus_salivarius	0	0	5.78901e-06	6.61361e-06
ANAGLYCOLYSIS-PWY: glycolysis III (from glucose)|unclassified	0	0	1.17834e-05	0
ARG+POLYAMINE-SYN: superpathway of arginine and polyamine biosynthesis	0	0	0.000205774	0.00022513
ARG+POLYAMINE-SYN: superpathway of arginine and polyamine biosynthesis|g__Cronobacter.s__Cronobacter_sakazakii	0	0	0	3.7225e-07
ARG+POLYAMINE-SYN: superpathway of arginine and polyamine biosynthesis|g__Klebsiella.s__Klebsiella_pneumoniae	0	0	1.27927e-05	1.94699e-05
ARG+POLYAMINE-SYN: superpathway of arginine and polyamine biosynthesis|g__Klebsiella.s__Klebsiella_quasipneumoniae	0	0	2.99551e-05	5.15386e-05
ARG+POLYAMINE-SYN: superpathway of arginine and polyamine biosynthesis|g__Klebsiella.s__Klebsiella_variicola	0	0	4.53512e-06	6.85248e-06
ARG+POLYAMINE-SYN: superpathway of arginine and polyamine biosynthesis|unclassified	0	0	3.15193e-06	0
ARGDEG-PWY: superpathway of L-arginine, putrescine, and 4-aminobutanoate degradation	0	0	8.12176e-05	0.000150622
ARGDEG-PWY: superpathway of L-arginine, putrescine, and 4-aminobutanoate degradation|g__Cronobacter.s__Cronobacter_sakazakii	0	0	0	2.51283e-07
ARGDEG-PWY: superpathway of L-arginine, putrescine, and 4-aminobutanoate degradation|g__Klebsiella.s__Klebsiella_pneumoniae	0	0	1.25732e-05	2.77133e-05
ARGDEG-PWY: superpathway of L-arginine, putrescine, and 4-aminobutanoate degradation|g__Klebsiella.s__Klebsiella_quasipneumoniae	0	0	3.73388e-05	7.5392e-05
ARGDEG-PWY: superpathway of L-arginine, putrescine, and 4-aminobutanoate degradation|g__Klebsiella.s__Klebsiella_variicola	0	0	3.4121e-06	6.68416e-06
ARGININE-SYN4-PWY: L-ornithine biosynthesis II	0	0	0.000129293	0.000174139
ARGININE-SYN4-PWY: L-ornithine biosynthesis II|g__Bacteroides.s__Bacteroides_cellulosilyticus	0	0	4.85383e-07	6.72157e-07
ARGININE-SYN4-PWY: L-ornithine biosynthesis II|g__Bacteroides.s__Bacteroides_dorei	0	0	6.00184e-06	5.82991e-06
ARGININE-SYN4-PWY: L-ornithine biosynthesis II|g__Bacteroides.s__Bacteroides_finegoldii	0	0	4.47973e-07	5.87622e-07
ARGININE-SYN4-PWY: L-ornithine biosynthesis II|g__Bacteroides.s__Bacteroides_fragilis	0	0	5.06829e-06	3.98044e-06
ARGININE-SYN4-PWY: L-ornithine biosynthesis II|g__Bacteroides.s__Bacteroides_stercoris	0	0	8.10611e-07	1.20748e-06
ARGININE-SYN4-PWY: L-ornithine biosynthesis II|g__Bacteroides.s__Bacteroides_thetaiotaomicron	0	0	3.53751e-06	2.79385e-06
ARGININE-SYN4-PWY: L-ornithine biosynthesis II|g__Bacteroides.s__Bacteroides_uniformis	0	0	2.30018e-06	2.09677e-06
ARGININE-SYN4-PWY: L-ornithine biosynthesis II|g__Bacteroides.s__Bacteroides_vulgatus	0	0	9.64995e-06	1.00327e-05
ARGININE-SYN4-PWY: L-ornithine biosynthesis II|g__Bacteroides.s__Bacteroides_xylanisolvens	0	0	1.09915e-06	1.22016e-06
ARGININE-SYN4-PWY: L-ornithine biosynthesis II|g__Klebsiella.s__Klebsiella_pneumoniae	0	0	4.44828e-05	9.7014e-05
ARGORNPROST-PWY	0	0	4.29872e-06	2.81719e-06
ARGSYN-PWY: L-arginine biosynthesis I (via L-ornithine)	0	0	0.00034445	0.000345045
ARGSYN-PWY: L-arginine biosynthesis I (via L-ornithine)|g__Agathobaculum.s__Agathobaculum_butyriciproducens	0	0	1.12245e-06	6.88309e-07
ARGSYN-PWY: L-arginine biosynthesis I (via L-ornithine)|g__Alistipes.s__Alistipes_finegoldii	0	0	2.13872e-06	1.71186e-06
ARGSYN-PWY: L-arginine biosynthesis I (via L-ornithine)|g__Anaerostipes.s__Anaerostipes_hadrus	0	0	8.51119e-07	7.43945e-07
ARGSYN-PWY: L-arginine biosynthesis I (via L-ornithine)|g__Bacteroides.s__Bacteroides_galacturonicus	0	0	2.76458e-06	1.83405e-06
ARGSYN-PWY: L-arginine biosynthesis I (via L-ornithine)|g__Bifidobacterium.s__Bifidobacterium_longum	0	0	0	6.41369e-07
ARGSYN-PWY: L-arginine biosynthesis I (via L-ornithine)|g__Blautia.s__Blautia_obeum	0	0	4.41006e-06	3.24959e-06
ARGSYN-PWY: L-arginine biosynthesis I (via L-ornithine)|g__Blautia.s__Blautia_sp_CAG_257	0	0	6.91021e-07	3.7743e-07
ARGSYN-PWY: L-arginine biosynthesis I (via L-ornithine)|g__Blautia.s__Blautia_wexlerae	0	0	4.00459e-06	3.08579e-06
ARGSYN-PWY: L-arginine biosynthesis I (via L-ornithine)|g__Blautia.s__Ruminococcus_torques	0	0	4.78473e-05	3.03639e-05
ARGSYN-PWY: L-arginine biosynthesis I (via L-ornithine)|g__Clostridium.s__Clostridium_bolteae_CAG_59	0	0	0	1.03146e-07
ARGSYN-PWY: L-arginine biosynthesis I (via L-ornithine)|g__Collinsella.s__Collinsella_aerofaciens	0	0	3.15927e-06	2.15786e-06
ARGSYN-PWY: L-arginine biosynthesis I (via L-ornithine)|g__Coprococcus.s__Coprococcus_catus	0	0	1.39096e-06	6.51498e-07
ARGSYN-PWY: L-arginine biosynthesis I (via L-ornithine)|g__Cronobacter.s__Cronobacter_sakazakii	0	0	0	5.50962e-07
ARGSYN-PWY: L-arginine biosynthesis I (via L-ornithine)|g__Dorea.s__Dorea_formicigenerans	0	0	4.69048e-06	3.26386e-06
ARGSYN-PWY: L-arginine biosynthesis I (via L-ornithine)|g__Dorea.s__Dorea_longicatena	0	0	4.36622e-06	3.8897e-06
ARGSYN-PWY: L-arginine biosynthesis I (via L-ornithine)|g__Dorea.s__Dorea_sp_CAG_317	0	0	5.82788e-07	2.2362e-07
ARGSYN-PWY: L-arginine biosynthesis I (via L-ornithine)|g__Eubacterium.s__Eubacterium_hallii	0	0	1.41151e-06	1.01942e-06
ARGSYN-PWY: L-arginine biosynthesis I (via L-ornithine)|g__Eubacterium.s__Eubacterium_ramulus	0	0	0	7.43691e-07
ARGSYN-PWY: L-arginine biosynthesis I (via L-ornithine)|g__Eubacterium.s__Eubacterium_sp_CAG_274	0	0	2.18815e-06	1.69478e-06
ARGSYN-PWY: L-arginine biosynthesis I (via L-ornithine)|g__Faecalibacterium.s__Faecalibacterium_prausnitzii	0	0	1.72734e-05	1.77174e-05
ARGSYN-PWY: L-arginine biosynthesis I (via L-ornithine)|g__Flavonifractor.s__Flavonifractor_plautii	0	0	8.58857e-07	3.94814e-07
ARGSYN-PWY: L-arginine biosynthesis I (via L-ornithine)|g__Fusicatenibacter.s__Fusicatenibacter_saccharivorans	0	0	2.11771e-06	1.64878e-06
ARGSYN-PWY: L-arginine biosynthesis I (via L-ornithine)|g__Gemmiger.s__Gemmiger_formicilis	0	0	4.53057e-06	3.09191e-06
ARGSYN-PWY: L-arginine biosynthesis I (via L-ornithine)|g__Intestinimonas.s__Intestinimonas_butyriciproducens	0	0	0	1.89621e-07
ARGSYN-PWY: L-arginine biosynthesis I (via L-ornithine)|g__Klebsiella.s__Klebsiella_pneumoniae	0	0	2.31737e-05	4.32008e-05
ARGSYN-PWY: L-arginine biosynthesis I (via L-ornithine)|g__Klebsiella.s__Klebsiella_quasipneumoniae	0	0	2.5379e-05	4.50169e-05
ARGSYN-PWY: L-arginine biosynthesis I (via L-ornithine)|g__Klebsiella.s__Klebsiella_variicola	0	0	6.28135e-06	1.01454e-05
ARGSYN-PWY: L-arginine biosynthesis I (via L-ornithine)|g__Lachnoclostridium.s__Clostridium_asparagiforme	0	0	0	7.72303e-08
ARGSYN-PWY: L-arginine biosynthesis I (via L-ornithine)|g__Lachnoclostridium.s__Clostridium_bolteae	0	0	4.47971e-08	7.46855e-08
ARGSYN-PWY: L-arginine biosynthesis I (via L-ornithine)|g__Lachnospira.s__Lachnospira_pectinoschiza	0	0	2.7596e-06	1.88024e-06
ARGSYN-PWY: L-arginine biosynthesis I (via L-ornithine)|g__Lachnospiraceae_unclassified.s__Eubacterium_rectale	0	0	1.9433e-06	1.30356e-06
ARGSYN-PWY: L-arginine biosynthesis I (via L-ornithine)|g__Lactobacillus.s__Lactobacillus_fermentum	0	0	0	3.83389e-07
ARGSYN-PWY: L-arginine biosynthesis I (via L-ornithine)|g__Lactobacillus.s__Lactobacillus_rogosae	0	0	2.56642e-06	1.7401e-06
ARGSYN-PWY: L-arginine biosynthesis I (via L-ornithine)|g__Megamonas.s__Megamonas_funiformis	0	0	4.23566e-06	3.06152e-06
ARGSYN-PWY: L-arginine biosynthesis I (via L-ornithine)|g__Parasutterella.s__Parasutterella_excrementihominis	0	0	6.30386e-07	3.24494e-07
ARGSYN-PWY: L-arginine biosynthesis I (via L-ornithine)|g__Phascolarctobacterium.s__Phascolarctobacterium_faecium	0	0	6.41999e-06	3.67745e-06
ARGSYN-PWY: L-arginine biosynthesis I (via L-ornithine)|g__Roseburia.s__Roseburia_faecis	0	0	9.13579e-06	5.22338e-06
ARGSYN-PWY: L-arginine biosynthesis I (via L-ornithine)|g__Roseburia.s__Roseburia_hominis	0	0	0	2.29862e-07
ARGSYN-PWY: L-arginine biosynthesis I (via L-ornithine)|g__Ruminococcus.s__Ruminococcus_callidus	0	0	3.96492e-06	2.0539e-07
ARGSYN-PWY: L-arginine biosynthesis I (via L-ornithine)|g__Streptococcus.s__Streptococcus_salivarius	0	0	5.26515e-06	7.16374e-06
ARGSYN-PWY: L-arginine biosynthesis I (via L-ornithine)|unclassified	0	0	1.95265e-05	0
ARGSYNBSUB-PWY: L-arginine biosynthesis II (acetyl cycle)	0	0	0.000346314	0.000317903
ARGSYNBSUB-PWY: L-arginine biosynthesis II (acetyl cycle)|g__Adlercreutzia.s__Adlercreutzia_equolifaciens	0	0	3.26949e-07	3.37065e-07
ARGSYNBSUB-PWY: L-arginine biosynthesis II (acetyl cycle)|g__Agathobaculum.s__Agathobaculum_butyriciproducens	0	0	1.41188e-06	7.62652e-07
ARGSYNBSUB-PWY: L-arginine biosynthesis II (acetyl cycle)|g__Akkermansia.s__Akkermansia_muciniphila	0	0	2.88308e-06	2.15456e-06
ARGSYNBSUB-PWY: L-arginine biosynthesis II (acetyl cycle)|g__Anaerostipes.s__Anaerostipes_hadrus	0	0	9.33492e-07	8.22266e-07
ARGSYNBSUB-PWY: L-arginine biosynthesis II (acetyl cycle)|g__Asaccharobacter.s__Asaccharobacter_celatus	0	0	2.23981e-07	1.95722e-07
ARGSYNBSUB-PWY: L-arginine biosynthesis II (acetyl cycle)|g__Bacteroides.s__Bacteroides_galacturonicus	0	0	3.21042e-06	2.41041e-06
ARGSYNBSUB-PWY: L-arginine biosynthesis II (acetyl cycle)|g__Bifidobacterium.s__Bifidobacterium_longum	0	0	3.9416e-07	6.35657e-07
ARGSYNBSUB-PWY: L-arginine biosynthesis II (acetyl cycle)|g__Bilophila.s__Bilophila_wadsworthia	0	0	2.49689e-06	1.73855e-06
ARGSYNBSUB-PWY: L-arginine biosynthesis II (acetyl cycle)|g__Blautia.s__Blautia_obeum	0	0	5.54465e-06	4.31464e-06
ARGSYNBSUB-PWY: L-arginine biosynthesis II (acetyl cycle)|g__Blautia.s__Blautia_sp_CAG_257	0	0	7.94676e-07	3.55737e-07
ARGSYNBSUB-PWY: L-arginine biosynthesis II (acetyl cycle)|g__Blautia.s__Blautia_wexlerae	0	0	4.44263e-06	3.70551e-06
ARGSYNBSUB-PWY: L-arginine biosynthesis II (acetyl cycle)|g__Blautia.s__Ruminococcus_torques	0	0	5.05666e-05	3.21015e-05
ARGSYNBSUB-PWY: L-arginine biosynthesis II (acetyl cycle)|g__Clostridium.s__Clostridium_bolteae_CAG_59	0	0	1.25694e-07	1.24879e-07
ARGSYNBSUB-PWY: L-arginine biosynthesis II (acetyl cycle)|g__Collinsella.s__Collinsella_aerofaciens	0	0	3.1046e-06	2.08525e-06
ARGSYNBSUB-PWY: L-arginine biosynthesis II (acetyl cycle)|g__Coprococcus.s__Coprococcus_catus	0	0	1.62162e-06	7.43292e-07
ARGSYNBSUB-PWY: L-arginine biosynthesis II (acetyl cycle)|g__Cronobacter.s__Cronobacter_sakazakii	0	0	0	5.55737e-07
ARGSYNBSUB-PWY: L-arginine biosynthesis II (acetyl cycle)|g__Dorea.s__Dorea_formicigenerans	0	0	4.70693e-06	3.45474e-06
ARGSYNBSUB-PWY: L-arginine biosynthesis II (acetyl cycle)|g__Dorea.s__Dorea_longicatena	0	0	4.6826e-06	4.53719e-06
ARGSYNBSUB-PWY: L-arginine biosynthesis II (acetyl cycle)|g__Dorea.s__Dorea_sp_CAG_317	0	0	5.52502e-07	3.35005e-07
ARGSYNBSUB-PWY: L-arginine biosynthesis II (acetyl cycle)|g__Eubacterium.s__Eubacterium_hallii	0	0	1.47456e-06	1.11242e-06
ARGSYNBSUB-PWY: L-arginine biosynthesis II (acetyl cycle)|g__Eubacterium.s__Eubacterium_ramulus	0	0	1.16082e-06	7.00483e-07
ARGSYNBSUB-PWY: L-arginine biosynthesis II (acetyl cycle)|g__Eubacterium.s__Eubacterium_sp_CAG_274	0	0	2.08615e-06	1.88731e-06
ARGSYNBSUB-PWY: L-arginine biosynthesis II (acetyl cycle)|g__Faecalibacterium.s__Faecalibacterium_prausnitzii	0	0	1.80023e-05	1.90503e-05
ARGSYNBSUB-PWY: L-arginine biosynthesis II (acetyl cycle)|g__Flavonifractor.s__Flavonifractor_plautii	0	0	8.13325e-07	3.69074e-07
ARGSYNBSUB-PWY: L-arginine biosynthesis II (acetyl cycle)|g__Fusicatenibacter.s__Fusicatenibacter_saccharivorans	0	0	2.64656e-06	1.67424e-06
ARGSYNBSUB-PWY: L-arginine biosynthesis II (acetyl cycle)|g__Gemmiger.s__Gemmiger_formicilis	0	0	4.36465e-06	2.94902e-06
ARGSYNBSUB-PWY: L-arginine biosynthesis II (acetyl cycle)|g__Intestinimonas.s__Intestinimonas_butyriciproducens	0	0	0	2.00366e-07
ARGSYNBSUB-PWY: L-arginine biosynthesis II (acetyl cycle)|g__Klebsiella.s__Klebsiella_pneumoniae	0	0	2.44932e-05	3.42874e-05
ARGSYNBSUB-PWY: L-arginine biosynthesis II (acetyl cycle)|g__Klebsiella.s__Klebsiella_quasipneumoniae	0	0	2.08943e-05	3.80948e-05
ARGSYNBSUB-PWY: L-arginine biosynthesis II (acetyl cycle)|g__Klebsiella.s__Klebsiella_variicola	0	0	5.44056e-06	7.40454e-06
ARGSYNBSUB-PWY: L-arginine biosynthesis II (acetyl cycle)|g__Lachnoclostridium.s__Clostridium_asparagiforme	0	0	0	1.02225e-07
ARGSYNBSUB-PWY: L-arginine biosynthesis II (acetyl cycle)|g__Lachnoclostridium.s__Clostridium_bolteae	0	0	5.13995e-08	7.8721e-08
ARGSYNBSUB-PWY: L-arginine biosynthesis II (acetyl cycle)|g__Lachnoclostridium.s__Clostridium_citroniae	0	0	0	6.9683e-08
ARGSYNBSUB-PWY: L-arginine biosynthesis II (acetyl cycle)|g__Lachnospira.s__Lachnospira_pectinoschiza	0	0	2.81797e-06	2.0508e-06
ARGSYNBSUB-PWY: L-arginine biosynthesis II (acetyl cycle)|g__Lachnospiraceae_unclassified.s__Eubacterium_rectale	0	0	2.56747e-06	1.80709e-06
ARGSYNBSUB-PWY: L-arginine biosynthesis II (acetyl cycle)|g__Lactobacillus.s__Lactobacillus_fermentum	0	0	0	3.94749e-07
ARGSYNBSUB-PWY: L-arginine biosynthesis II (acetyl cycle)|g__Lactobacillus.s__Lactobacillus_rogosae	0	0	2.48071e-06	1.77143e-06
ARGSYNBSUB-PWY: L-arginine biosynthesis II (acetyl cycle)|g__Lawsonibacter.s__Lawsonibacter_asaccharolyticus	0	0	0	2.0305e-07
ARGSYNBSUB-PWY: L-arginine biosynthesis II (acetyl cycle)|g__Megamonas.s__Megamonas_funiformis	0	0	6.5824e-06	5.39022e-06
ARGSYNBSUB-PWY: L-arginine biosynthesis II (acetyl cycle)|g__Parasutterella.s__Parasutterella_excrementihominis	0	0	6.94729e-07	3.7894e-07
ARGSYNBSUB-PWY: L-arginine biosynthesis II (acetyl cycle)|g__Phascolarctobacterium.s__Phascolarctobacterium_faecium	0	0	6.35611e-06	3.75403e-06
ARGSYNBSUB-PWY: L-arginine biosynthesis II (acetyl cycle)|g__Roseburia.s__Roseburia_faecis	0	0	1.01399e-05	5.31972e-06
ARGSYNBSUB-PWY: L-arginine biosynthesis II (acetyl cycle)|g__Roseburia.s__Roseburia_hominis	0	0	0	2.36723e-07
ARGSYNBSUB-PWY: L-arginine biosynthesis II (acetyl cycle)|g__Roseburia.s__Roseburia_inulinivorans	0	0	0	2.91579e-07
ARGSYNBSUB-PWY: L-arginine biosynthesis II (acetyl cycle)|g__Ruminococcus.s__Ruminococcus_callidus	0	0	4.03106e-06	2.35493e-07
ARGSYNBSUB-PWY: L-arginine biosynthesis II (acetyl cycle)|g__Streptococcus.s__Streptococcus_salivarius	0	0	5.59222e-06	7.75712e-06
ARGSYNBSUB-PWY: L-arginine biosynthesis II (acetyl cycle)|unclassified	0	0	1.3358e-05	0
ARO-PWY: chorismate biosynthesis I	0	0	0.000394446	0.000368551
ARO-PWY: chorismate biosynthesis I|g__Acidaminococcus.s__Acidaminococcus_intestini	0	0	4.86805e-06	3.97523e-06
ARO-PWY: chorismate biosynthesis I|g__Agathobaculum.s__Agathobaculum_butyriciproducens	0	0	1.79504e-06	1.19369e-06
ARO-PWY: chorismate biosynthesis I|g__Alistipes.s__Alistipes_finegoldii	0	0	1.68655e-06	1.0411e-06
ARO-PWY: chorismate biosynthesis I|g__Anaerostipes.s__Anaerostipes_hadrus	0	0	8.05021e-07	8.50691e-07
ARO-PWY: chorismate biosynthesis I|g__Bacteroides.s__Bacteroides_cellulosilyticus	0	0	0	1.66998e-06
ARO-PWY: chorismate biosynthesis I|g__Bifidobacterium.s__Bifidobacterium_longum	0	0	3.35708e-07	3.41242e-07
ARO-PWY: chorismate biosynthesis I|g__Blautia.s__Blautia_obeum	0	0	1.20905e-05	8.65385e-06
ARO-PWY: chorismate biosynthesis I|g__Blautia.s__Blautia_sp_CAG_257	0	0	0	3.82785e-07
ARO-PWY: chorismate biosynthesis I|g__Blautia.s__Blautia_wexlerae	0	0	3.24368e-06	2.33238e-06
ARO-PWY: chorismate biosynthesis I|g__Blautia.s__Ruminococcus_torques	0	0	5.02214e-05	2.96081e-05
ARO-PWY: chorismate biosynthesis I|g__Clostridium.s__Clostridium_bolteae_CAG_59	0	0	0	1.05427e-07
ARO-PWY: chorismate biosynthesis I|g__Coprococcus.s__Coprococcus_catus	0	0	1.34608e-06	8.82295e-07
ARO-PWY: chorismate biosynthesis I|g__Cronobacter.s__Cronobacter_sakazakii	0	0	0	1.02773e-07
ARO-PWY: chorismate biosynthesis I|g__Dorea.s__Dorea_formicigenerans	0	0	5.30839e-06	3.40879e-06
ARO-PWY: chorismate biosynthesis I|g__Dorea.s__Dorea_longicatena	0	0	0	3.32257e-07
ARO-PWY: chorismate biosynthesis I|g__Eubacterium.s__Eubacterium_hallii	0	0	1.63691e-06	1.18461e-06
ARO-PWY: chorismate biosynthesis I|g__Eubacterium.s__Eubacterium_sp_CAG_251	0	0	1.92562e-06	1.63747e-06
ARO-PWY: chorismate biosynthesis I|g__Eubacterium.s__Eubacterium_sp_CAG_274	0	0	1.26722e-06	1.1208e-06
ARO-PWY: chorismate biosynthesis I|g__Faecalibacterium.s__Faecalibacterium_prausnitzii	0	0	0	8.44608e-07
ARO-PWY: chorismate biosynthesis I|g__Flavonifractor.s__Flavonifractor_plautii	0	0	5.21755e-07	2.93874e-07
ARO-PWY: chorismate biosynthesis I|g__Fusicatenibacter.s__Fusicatenibacter_saccharivorans	0	0	2.14972e-06	1.12746e-06
ARO-PWY: chorismate biosynthesis I|g__Haemophilus.s__Haemophilus_parainfluenzae	0	0	3.4738e-06	6.75727e-06
ARO-PWY: chorismate biosynthesis I|g__Haemophilus.s__Haemophilus_sputorum	0	0	0	1.69431e-07
ARO-PWY: chorismate biosynthesis I|g__Intestinimonas.s__Intestinimonas_butyriciproducens	0	0	0	2.06378e-07
ARO-PWY: chorismate biosynthesis I|g__Klebsiella.s__Klebsiella_pneumoniae	0	0	1.69276e-05	2.52478e-05
ARO-PWY: chorismate biosynthesis I|g__Klebsiella.s__Klebsiella_quasipneumoniae	0	0	4.55182e-05	8.0413e-05
ARO-PWY: chorismate biosynthesis I|g__Klebsiella.s__Klebsiella_variicola	0	0	6.38982e-06	9.51985e-06
ARO-PWY: chorismate biosynthesis I|g__Lachnospira.s__Lachnospira_pectinoschiza	0	0	3.2945e-06	2.13284e-06
ARO-PWY: chorismate biosynthesis I|g__Lachnospiraceae_unclassified.s__Eubacterium_rectale	0	0	4.44867e-06	2.96191e-06
ARO-PWY: chorismate biosynthesis I|g__Lactobacillus.s__Lactobacillus_rogosae	0	0	1.92581e-06	1.4892e-06
ARO-PWY: chorismate biosynthesis I|g__Megasphaera.s__Megasphaera_sp_DISK_18	0	0	2.73497e-06	1.50943e-06
ARO-PWY: chorismate biosynthesis I|g__Monoglobus.s__Monoglobus_pectinilyticus	0	0	0	5.42269e-08
ARO-PWY: chorismate biosynthesis I|g__Parabacteroides.s__Parabacteroides_distasonis	0	0	4.31569e-06	2.75075e-06
ARO-PWY: chorismate biosynthesis I|g__Parabacteroides.s__Parabacteroides_merdae	0	0	4.98231e-06	4.31863e-06
ARO-PWY: chorismate biosynthesis I|g__Parasutterella.s__Parasutterella_excrementihominis	0	0	7.61489e-07	4.29812e-07
ARO-PWY: chorismate biosynthesis I|g__Roseburia.s__Roseburia_faecis	0	0	9.67378e-06	5.0765e-06
ARO-PWY: chorismate biosynthesis I|g__Roseburia.s__Roseburia_hominis	0	0	0	1.68077e-07
ARO-PWY: chorismate biosynthesis I|g__Roseburia.s__Roseburia_inulinivorans	0	0	0	2.25016e-07
ARO-PWY: chorismate biosynthesis I|g__Ruminococcus.s__Ruminococcus_callidus	0	0	3.91603e-06	1.71354e-07
ARO-PWY: chorismate biosynthesis I|g__Streptococcus.s__Streptococcus_parasanguinis	0	0	0	8.04978e-07
ARO-PWY: chorismate biosynthesis I|g__Streptococcus.s__Streptococcus_salivarius	0	0	5.18656e-06	7.65519e-06
ARO-PWY: chorismate biosynthesis I|unclassified	0	0	2.25981e-05	0
ASPASN-PWY: superpathway of L-aspartate and L-asparagine biosynthesis	0	0	0.00024684	0.000278461
ASPASN-PWY: superpathway of L-aspartate and L-asparagine biosynthesis|g__Bacteroides.s__Bacteroides_cellulosilyticus	0	0	3.79226e-07	7.36356e-07
ASPASN-PWY: superpathway of L-aspartate and L-asparagine biosynthesis|g__Bacteroides.s__Bacteroides_dorei	0	0	5.75525e-06	6.04592e-06
ASPASN-PWY: superpathway of L-aspartate and L-asparagine biosynthesis|g__Bacteroides.s__Bacteroides_fragilis	0	0	3.48277e-06	3.81747e-06
ASPASN-PWY: superpathway of L-aspartate and L-asparagine biosynthesis|g__Bacteroides.s__Bacteroides_stercoris	0	0	8.64797e-07	1.38868e-06
ASPASN-PWY: superpathway of L-aspartate and L-asparagine biosynthesis|g__Bacteroides.s__Bacteroides_uniformis	0	0	1.94837e-06	1.67986e-06
ASPASN-PWY: superpathway of L-aspartate and L-asparagine biosynthesis|g__Bacteroides.s__Bacteroides_vulgatus	0	0	1.25334e-05	1.47985e-05
ASPASN-PWY: superpathway of L-aspartate and L-asparagine biosynthesis|g__Blautia.s__Blautia_obeum	0	0	4.73821e-06	3.76499e-06
ASPASN-PWY: superpathway of L-aspartate and L-asparagine biosynthesis|g__Blautia.s__Blautia_wexlerae	0	0	5.84446e-07	4.05639e-07
ASPASN-PWY: superpathway of L-aspartate and L-asparagine biosynthesis|g__Blautia.s__Ruminococcus_torques	0	0	1.11335e-05	7.32334e-06
ASPASN-PWY: superpathway of L-aspartate and L-asparagine biosynthesis|g__Cronobacter.s__Cronobacter_sakazakii	0	0	1.41198e-07	4.5393e-07
ASPASN-PWY: superpathway of L-aspartate and L-asparagine biosynthesis|g__Flavonifractor.s__Flavonifractor_plautii	0	0	0	2.41534e-07
ASPASN-PWY: superpathway of L-aspartate and L-asparagine biosynthesis|g__Haemophilus.s__Haemophilus_parahaemolyticus	0	0	0	1.05114e-07
ASPASN-PWY: superpathway of L-aspartate and L-asparagine biosynthesis|g__Haemophilus.s__Haemophilus_parainfluenzae	0	0	3.3615e-06	6.93503e-06
ASPASN-PWY: superpathway of L-aspartate and L-asparagine biosynthesis|g__Haemophilus.s__Haemophilus_paraphrohaemolyticus	0	0	0	3.15176e-08
ASPASN-PWY: superpathway of L-aspartate and L-asparagine biosynthesis|g__Haemophilus.s__Haemophilus_sputorum	0	0	0	2.06958e-07
ASPASN-PWY: superpathway of L-aspartate and L-asparagine biosynthesis|g__Intestinimonas.s__Intestinimonas_butyriciproducens	0	0	0	2.55777e-07
ASPASN-PWY: superpathway of L-aspartate and L-asparagine biosynthesis|g__Klebsiella.s__Klebsiella_pneumoniae	0	0	2.60209e-05	4.09913e-05
ASPASN-PWY: superpathway of L-aspartate and L-asparagine biosynthesis|g__Klebsiella.s__Klebsiella_quasipneumoniae	0	0	6.82518e-05	0.000135841
ASPASN-PWY: superpathway of L-aspartate and L-asparagine biosynthesis|g__Klebsiella.s__Klebsiella_variicola	0	0	7.84731e-06	9.49283e-06
ASPASN-PWY: superpathway of L-aspartate and L-asparagine biosynthesis|g__Lachnoclostridium.s__Clostridium_asparagiforme	0	0	0	9.85327e-08
ASPASN-PWY: superpathway of L-aspartate and L-asparagine biosynthesis|g__Odoribacter.s__Odoribacter_splanchnicus	0	0	1.78546e-06	1.38057e-06
ASPASN-PWY: superpathway of L-aspartate and L-asparagine biosynthesis|g__Parabacteroides.s__Parabacteroides_distasonis	0	0	4.01472e-06	1.99307e-06
ASPASN-PWY: superpathway of L-aspartate and L-asparagine biosynthesis|g__Streptococcus.s__Streptococcus_mitis	0	0	0	1.70246e-07
ASPASN-PWY: superpathway of L-aspartate and L-asparagine biosynthesis|unclassified	0	0	3.34264e-06	0
AST-PWY: L-arginine degradation II (AST pathway)	0	0	0.00011183	0.000239581
AST-PWY: L-arginine degradation II (AST pathway)|g__Cronobacter.s__Cronobacter_sakazakii	0	0	0	3.55251e-07
AST-PWY: L-arginine degradation II (AST pathway)|g__Klebsiella.s__Klebsiella_pneumoniae	0	0	3.73228e-05	7.8992e-05
AST-PWY: L-arginine degradation II (AST pathway)|g__Klebsiella.s__Klebsiella_quasipneumoniae	0	0	6.31924e-05	0.000132137
AST-PWY: L-arginine degradation II (AST pathway)|g__Klebsiella.s__Klebsiella_variicola	0	0	6.21826e-06	1.2408e-05
BIOTIN-BIOSYNTHESIS-PWY: biotin biosynthesis I	0	0	0.000189908	0.000253956
BIOTIN-BIOSYNTHESIS-PWY: biotin biosynthesis I|g__Bacteroides.s__Bacteroides_cellulosilyticus	0	0	0	3.57325e-07
BIOTIN-BIOSYNTHESIS-PWY: biotin biosynthesis I|g__Cronobacter.s__Cronobacter_sakazakii	0	0	0	4.02884e-07
BIOTIN-BIOSYNTHESIS-PWY: biotin biosynthesis I|g__Haemophilus.s__Haemophilus_parainfluenzae	0	0	2.27742e-06	5.32705e-06
BIOTIN-BIOSYNTHESIS-PWY: biotin biosynthesis I|g__Klebsiella.s__Klebsiella_pneumoniae	0	0	9.70534e-06	2.24641e-05
BIOTIN-BIOSYNTHESIS-PWY: biotin biosynthesis I|g__Klebsiella.s__Klebsiella_quasipneumoniae	0	0	4.77279e-05	9.14015e-05
BIOTIN-BIOSYNTHESIS-PWY: biotin biosynthesis I|g__Klebsiella.s__Klebsiella_variicola	0	0	6.5924e-06	1.15953e-05
BRANCHED-CHAIN-AA-SYN-PWY: superpathway of branched chain amino acid biosynthesis	0	0	0.000338947	0.000298658
BRANCHED-CHAIN-AA-SYN-PWY: superpathway of branched chain amino acid biosynthesis|g__Actinomyces.s__Actinomyces_sp_ICM47	0	0	0	4.17646e-07
BRANCHED-CHAIN-AA-SYN-PWY: superpathway of branched chain amino acid biosynthesis|g__Adlercreutzia.s__Adlercreutzia_equolifaciens	0	0	1.91516e-07	2.43832e-07
BRANCHED-CHAIN-AA-SYN-PWY: superpathway of branched chain amino acid biosynthesis|g__Agathobaculum.s__Agathobaculum_butyriciproducens	0	0	1.89674e-06	1.1568e-06
BRANCHED-CHAIN-AA-SYN-PWY: superpathway of branched chain amino acid biosynthesis|g__Akkermansia.s__Akkermansia_muciniphila	0	0	3.27261e-06	2.40345e-06
BRANCHED-CHAIN-AA-SYN-PWY: superpathway of branched chain amino acid biosynthesis|g__Anaerostipes.s__Anaerostipes_hadrus	0	0	1.26078e-06	9.44029e-07
BRANCHED-CHAIN-AA-SYN-PWY: superpathway of branched chain amino acid biosynthesis|g__Asaccharobacter.s__Asaccharobacter_celatus	0	0	3.02576e-07	1.26978e-07
BRANCHED-CHAIN-AA-SYN-PWY: superpathway of branched chain amino acid biosynthesis|g__Bacteroides.s__Bacteroides_cellulosilyticus	0	0	3.31224e-07	6.27701e-07
BRANCHED-CHAIN-AA-SYN-PWY: superpathway of branched chain amino acid biosynthesis|g__Bacteroides.s__Bacteroides_finegoldii	0	0	5.71096e-07	7.02534e-07
BRANCHED-CHAIN-AA-SYN-PWY: superpathway of branched chain amino acid biosynthesis|g__Bacteroides.s__Bacteroides_fragilis	0	0	1.51383e-05	1.16025e-05
BRANCHED-CHAIN-AA-SYN-PWY: superpathway of branched chain amino acid biosynthesis|g__Bacteroides.s__Bacteroides_stercoris	0	0	6.70443e-07	1.33465e-06
BRANCHED-CHAIN-AA-SYN-PWY: superpathway of branched chain amino acid biosynthesis|g__Bacteroides.s__Bacteroides_thetaiotaomicron	0	0	4.11433e-06	3.25336e-06
BRANCHED-CHAIN-AA-SYN-PWY: superpathway of branched chain amino acid biosynthesis|g__Bacteroides.s__Bacteroides_uniformis	0	0	2.98806e-06	2.15213e-06
BRANCHED-CHAIN-AA-SYN-PWY: superpathway of branched chain amino acid biosynthesis|g__Bacteroides.s__Bacteroides_xylanisolvens	0	0	1.15481e-06	1.56291e-06
BRANCHED-CHAIN-AA-SYN-PWY: superpathway of branched chain amino acid biosynthesis|g__Bifidobacterium.s__Bifidobacterium_longum	0	0	6.37361e-07	4.41582e-07
BRANCHED-CHAIN-AA-SYN-PWY: superpathway of branched chain amino acid biosynthesis|g__Bilophila.s__Bilophila_wadsworthia	0	0	2.36279e-06	1.83796e-06
BRANCHED-CHAIN-AA-SYN-PWY: superpathway of branched chain amino acid biosynthesis|g__Blautia.s__Blautia_obeum	0	0	7.82316e-06	5.47682e-06
BRANCHED-CHAIN-AA-SYN-PWY: superpathway of branched chain amino acid biosynthesis|g__Blautia.s__Blautia_wexlerae	0	0	6.71155e-06	4.60833e-06
BRANCHED-CHAIN-AA-SYN-PWY: superpathway of branched chain amino acid biosynthesis|g__Blautia.s__Ruminococcus_torques	0	0	4.33065e-05	2.76006e-05
BRANCHED-CHAIN-AA-SYN-PWY: superpathway of branched chain amino acid biosynthesis|g__Dorea.s__Dorea_formicigenerans	0	0	5.22846e-06	2.86755e-06
BRANCHED-CHAIN-AA-SYN-PWY: superpathway of branched chain amino acid biosynthesis|g__Dorea.s__Dorea_longicatena	0	0	5.06791e-06	4.16779e-06
BRANCHED-CHAIN-AA-SYN-PWY: superpathway of branched chain amino acid biosynthesis|g__Eubacterium.s__Eubacterium_hallii	0	0	1.47025e-06	1.41017e-06
BRANCHED-CHAIN-AA-SYN-PWY: superpathway of branched chain amino acid biosynthesis|g__Eubacterium.s__Eubacterium_sp_CAG_274	0	0	1.96344e-06	1.19122e-06
BRANCHED-CHAIN-AA-SYN-PWY: superpathway of branched chain amino acid biosynthesis|g__Flavonifractor.s__Flavonifractor_plautii	0	0	9.02368e-07	4.02182e-07
BRANCHED-CHAIN-AA-SYN-PWY: superpathway of branched chain amino acid biosynthesis|g__Gemmiger.s__Gemmiger_formicilis	0	0	3.93969e-06	2.64655e-06
BRANCHED-CHAIN-AA-SYN-PWY: superpathway of branched chain amino acid biosynthesis|g__Haemophilus.s__Haemophilus_parahaemolyticus	0	0	7.80471e-08	6.82458e-08
BRANCHED-CHAIN-AA-SYN-PWY: superpathway of branched chain amino acid biosynthesis|g__Haemophilus.s__Haemophilus_parainfluenzae	0	0	8.59532e-08	5.1334e-07
BRANCHED-CHAIN-AA-SYN-PWY: superpathway of branched chain amino acid biosynthesis|g__Haemophilus.s__Haemophilus_paraphrohaemolyticus	0	0	5.78489e-08	6.03708e-08
BRANCHED-CHAIN-AA-SYN-PWY: superpathway of branched chain amino acid biosynthesis|g__Haemophilus.s__Haemophilus_sputorum	0	0	1.73389e-07	1.30504e-06
BRANCHED-CHAIN-AA-SYN-PWY: superpathway of branched chain amino acid biosynthesis|g__Intestinimonas.s__Intestinimonas_butyriciproducens	0	0	0	2.02867e-07
BRANCHED-CHAIN-AA-SYN-PWY: superpathway of branched chain amino acid biosynthesis|g__Klebsiella.s__Klebsiella_pneumoniae	0	0	6.45782e-06	1.81235e-05
BRANCHED-CHAIN-AA-SYN-PWY: superpathway of branched chain amino acid biosynthesis|g__Klebsiella.s__Klebsiella_quasipneumoniae	0	0	3.73999e-05	5.95457e-05
BRANCHED-CHAIN-AA-SYN-PWY: superpathway of branched chain amino acid biosynthesis|g__Klebsiella.s__Klebsiella_variicola	0	0	6.30292e-06	7.52793e-06
BRANCHED-CHAIN-AA-SYN-PWY: superpathway of branched chain amino acid biosynthesis|g__Lachnoclostridium.s__Clostridium_asparagiforme	0	0	0	1.44119e-07
BRANCHED-CHAIN-AA-SYN-PWY: superpathway of branched chain amino acid biosynthesis|g__Lachnospiraceae_unclassified.s__Eubacterium_rectale	0	0	2.84912e-06	1.76791e-06
BRANCHED-CHAIN-AA-SYN-PWY: superpathway of branched chain amino acid biosynthesis|g__Monoglobus.s__Monoglobus_pectinilyticus	0	0	0	1.58339e-07
BRANCHED-CHAIN-AA-SYN-PWY: superpathway of branched chain amino acid biosynthesis|g__Parabacteroides.s__Parabacteroides_distasonis	0	0	4.24975e-06	2.80333e-06
BRANCHED-CHAIN-AA-SYN-PWY: superpathway of branched chain amino acid biosynthesis|g__Parabacteroides.s__Parabacteroides_merdae	0	0	4.29252e-06	4.29839e-06
BRANCHED-CHAIN-AA-SYN-PWY: superpathway of branched chain amino acid biosynthesis|g__Roseburia.s__Roseburia_hominis	0	0	0	1.51942e-07
BRANCHED-CHAIN-AA-SYN-PWY: superpathway of branched chain amino acid biosynthesis|g__Roseburia.s__Roseburia_inulinivorans	0	0	0	2.4448e-07
BRANCHED-CHAIN-AA-SYN-PWY: superpathway of branched chain amino acid biosynthesis|g__Ruthenibacterium.s__Ruthenibacterium_lactatiformans	0	0	0	1.5775e-07
BRANCHED-CHAIN-AA-SYN-PWY: superpathway of branched chain amino acid biosynthesis|g__Streptococcus.s__Streptococcus_mitis	0	0	0	3.37475e-08
BRANCHED-CHAIN-AA-SYN-PWY: superpathway of branched chain amino acid biosynthesis|g__Streptococcus.s__Streptococcus_parasanguinis	0	0	1.00827e-06	1.30003e-06
BRANCHED-CHAIN-AA-SYN-PWY: superpathway of branched chain amino acid biosynthesis|g__Streptococcus.s__Streptococcus_salivarius	0	0	7.21168e-06	8.76115e-06
BRANCHED-CHAIN-AA-SYN-PWY: superpathway of branched chain amino acid biosynthesis|g__Veillonella.s__Veillonella_atypica	0	0	1.16268e-06	8.98089e-07
BRANCHED-CHAIN-AA-SYN-PWY: superpathway of branched chain amino acid biosynthesis|g__Veillonella.s__Veillonella_dispar	0	0	5.52162e-07	5.93844e-07
BRANCHED-CHAIN-AA-SYN-PWY: superpathway of branched chain amino acid biosynthesis|g__Veillonella.s__Veillonella_infantium	0	0	1.96239e-07	3.40822e-07
BRANCHED-CHAIN-AA-SYN-PWY: superpathway of branched chain amino acid biosynthesis|g__Veillonella.s__Veillonella_parvula	0	0	0	3.59385e-07
BRANCHED-CHAIN-AA-SYN-PWY: superpathway of branched chain amino acid biosynthesis|g__Veillonella.s__Veillonella_sp_T11011_6	0	0	6.9195e-08	3.16568e-07
BRANCHED-CHAIN-AA-SYN-PWY: superpathway of branched chain amino acid biosynthesis|unclassified	0	0	1.38374e-05	0
CALVIN-PWY: Calvin-Benson-Bassham cycle	0	0	0.000419715	0.000466902
CALVIN-PWY: Calvin-Benson-Bassham cycle|g__Anaerostipes.s__Anaerostipes_hadrus	0	0	1.84234e-06	8.72042e-07
CALVIN-PWY: Calvin-Benson-Bassham cycle|g__Bacteroides.s__Bacteroides_cellulosilyticus	0	0	4.71989e-07	3.63027e-07
CALVIN-PWY: Calvin-Benson-Bassham cycle|g__Bacteroides.s__Bacteroides_fragilis	0	0	3.82473e-07	4.82843e-07
CALVIN-PWY: Calvin-Benson-Bassham cycle|g__Blautia.s__Blautia_obeum	0	0	7.71404e-06	5.38809e-06
CALVIN-PWY: Calvin-Benson-Bassham cycle|g__Blautia.s__Blautia_sp_CAG_257	0	0	8.25709e-07	6.03864e-07
CALVIN-PWY: Calvin-Benson-Bassham cycle|g__Blautia.s__Blautia_wexlerae	0	0	4.57784e-06	3.439e-06
CALVIN-PWY: Calvin-Benson-Bassham cycle|g__Blautia.s__Ruminococcus_torques	0	0	4.70246e-05	2.77803e-05
CALVIN-PWY: Calvin-Benson-Bassham cycle|g__Clostridium.s__Clostridium_bolteae_CAG_59	0	0	0	2.09924e-07
CALVIN-PWY: Calvin-Benson-Bassham cycle|g__Clostridium.s__Clostridium_sp_CAG_58	0	0	6.42227e-07	3.31161e-07
CALVIN-PWY: Calvin-Benson-Bassham cycle|g__Collinsella.s__Collinsella_aerofaciens	0	0	2.16778e-06	2.01275e-06
CALVIN-PWY: Calvin-Benson-Bassham cycle|g__Coprococcus.s__Coprococcus_catus	0	0	1.799e-06	8.02755e-07
CALVIN-PWY: Calvin-Benson-Bassham cycle|g__Cronobacter.s__Cronobacter_sakazakii	0	0	1.09442e-07	1.0911e-06
CALVIN-PWY: Calvin-Benson-Bassham cycle|g__Dorea.s__Dorea_longicatena	0	0	0	9.37647e-07
CALVIN-PWY: Calvin-Benson-Bassham cycle|g__Eubacterium.s__Eubacterium_hallii	0	0	3.06886e-06	2.57402e-06
CALVIN-PWY: Calvin-Benson-Bassham cycle|g__Flavonifractor.s__Flavonifractor_plautii	0	0	4.05976e-07	4.44823e-07
CALVIN-PWY: Calvin-Benson-Bassham cycle|g__Fusicatenibacter.s__Fusicatenibacter_saccharivorans	0	0	1.64094e-06	1.19293e-06
CALVIN-PWY: Calvin-Benson-Bassham cycle|g__Haemophilus.s__Haemophilus_parahaemolyticus	0	0	1.19726e-07	5.39097e-08
CALVIN-PWY: Calvin-Benson-Bassham cycle|g__Haemophilus.s__Haemophilus_parainfluenzae	0	0	3.86192e-06	6.92161e-06
CALVIN-PWY: Calvin-Benson-Bassham cycle|g__Haemophilus.s__Haemophilus_paraphrohaemolyticus	0	0	1.13398e-07	2.09065e-08
CALVIN-PWY: Calvin-Benson-Bassham cycle|g__Haemophilus.s__Haemophilus_sputorum	0	0	0	2.54011e-07
CALVIN-PWY: Calvin-Benson-Bassham cycle|g__Intestinimonas.s__Intestinimonas_butyriciproducens	0	0	0	2.14418e-07
CALVIN-PWY: Calvin-Benson-Bassham cycle|g__Klebsiella.s__Klebsiella_pneumoniae	0	0	4.83343e-05	8.64573e-05
CALVIN-PWY: Calvin-Benson-Bassham cycle|g__Klebsiella.s__Klebsiella_quasipneumoniae	0	0	7.80035e-05	0.000139114
CALVIN-PWY: Calvin-Benson-Bassham cycle|g__Klebsiella.s__Klebsiella_variicola	0	0	7.81433e-06	1.31975e-05
CALVIN-PWY: Calvin-Benson-Bassham cycle|g__Lachnoclostridium.s__Clostridium_asparagiforme	0	0	0	5.93106e-08
CALVIN-PWY: Calvin-Benson-Bassham cycle|g__Lachnoclostridium.s__Clostridium_bolteae	0	0	2.84787e-07	8.68285e-08
CALVIN-PWY: Calvin-Benson-Bassham cycle|g__Lachnospiraceae_unclassified.s__Eubacterium_rectale	0	0	4.2446e-06	3.10314e-06
CALVIN-PWY: Calvin-Benson-Bassham cycle|g__Roseburia.s__Roseburia_faecis	0	0	9.39149e-06	5.22298e-06
CALVIN-PWY: Calvin-Benson-Bassham cycle|g__Roseburia.s__Roseburia_hominis	0	0	0	1.39455e-07
CALVIN-PWY: Calvin-Benson-Bassham cycle|g__Roseburia.s__Roseburia_inulinivorans	0	0	0	3.93573e-07
CALVIN-PWY: Calvin-Benson-Bassham cycle|g__Streptococcus.s__Streptococcus_salivarius	0	0	0	2.96566e-07
CALVIN-PWY: Calvin-Benson-Bassham cycle|unclassified	0	0	9.77098e-06	0
CATECHOL-ORTHO-CLEAVAGE-PWY: catechol degradation to &beta;-ketoadipate	0	0	5.28426e-05	9.63841e-05
CATECHOL-ORTHO-CLEAVAGE-PWY: catechol degradation to &beta;-ketoadipate|g__Klebsiella.s__Klebsiella_pneumoniae	0	0	1.46394e-05	3.01007e-05
CATECHOL-ORTHO-CLEAVAGE-PWY: catechol degradation to &beta;-ketoadipate|g__Klebsiella.s__Klebsiella_quasipneumoniae	0	0	2.18264e-05	4.45128e-05
CATECHOL-ORTHO-CLEAVAGE-PWY: catechol degradation to &beta;-ketoadipate|g__Klebsiella.s__Klebsiella_variicola	0	0	6.16202e-06	9.53064e-06
CENTFERM-PWY: pyruvate fermentation to butanoate	0	0	1.1138e-05	9.44641e-06
CITRULBIO-PWY: L-citrulline biosynthesis	0	0	0.000111892	0.000114473
CITRULBIO-PWY: L-citrulline biosynthesis|g__Alistipes.s__Alistipes_finegoldii	0	0	1.48578e-06	1.30295e-06
CITRULBIO-PWY: L-citrulline biosynthesis|g__Coprococcus.s__Coprococcus_catus	0	0	1.26138e-06	5.54715e-07
CITRULBIO-PWY: L-citrulline biosynthesis|g__Flavonifractor.s__Flavonifractor_plautii	0	0	0	3.0234e-07
CITRULBIO-PWY: L-citrulline biosynthesis|g__Klebsiella.s__Klebsiella_pneumoniae	0	0	1.9709e-06	5.83355e-06
CITRULBIO-PWY: L-citrulline biosynthesis|g__Klebsiella.s__Klebsiella_variicola	0	0	3.21686e-06	4.88862e-06
CITRULBIO-PWY: L-citrulline biosynthesis|g__Lactobacillus.s__Lactobacillus_fermentum	0	0	0	1.19767e-07
COA-PWY-1: superpathway of coenzyme A biosynthesis III (mammals)	0	0	0.000341751	0.00028196
COA-PWY-1: superpathway of coenzyme A biosynthesis III (mammals)|g__Absiella.s__Absiella_dolichum	0	0	0	2.14979e-08
COA-PWY-1: superpathway of coenzyme A biosynthesis III (mammals)|g__Acidaminococcus.s__Acidaminococcus_intestini	0	0	4.34109e-06	3.4554e-06
COA-PWY-1: superpathway of coenzyme A biosynthesis III (mammals)|g__Actinomyces.s__Actinomyces_sp_ICM47	0	0	0	1.76919e-07
COA-PWY-1: superpathway of coenzyme A biosynthesis III (mammals)|g__Agathobaculum.s__Agathobaculum_butyriciproducens	0	0	1.8172e-06	1.46231e-06
COA-PWY-1: superpathway of coenzyme A biosynthesis III (mammals)|g__Akkermansia.s__Akkermansia_muciniphila	0	0	3.97739e-06	2.50607e-06
COA-PWY-1: superpathway of coenzyme A biosynthesis III (mammals)|g__Alistipes.s__Alistipes_finegoldii	0	0	2.50418e-06	1.67475e-06
COA-PWY-1: superpathway of coenzyme A biosynthesis III (mammals)|g__Alistipes.s__Alistipes_putredinis	0	0	1.24514e-05	3.78797e-06
COA-PWY-1: superpathway of coenzyme A biosynthesis III (mammals)|g__Anaerostipes.s__Anaerostipes_hadrus	0	0	1.34514e-06	8.02794e-07
COA-PWY-1: superpathway of coenzyme A biosynthesis III (mammals)|g__Bacteroides.s__Bacteroides_cellulosilyticus	0	0	1.17213e-05	8.41639e-06
COA-PWY-1: superpathway of coenzyme A biosynthesis III (mammals)|g__Bacteroides.s__Bacteroides_dorei	0	0	5.83802e-06	5.71299e-06
COA-PWY-1: superpathway of coenzyme A biosynthesis III (mammals)|g__Bacteroides.s__Bacteroides_finegoldii	0	0	4.07549e-07	4.11372e-07
COA-PWY-1: superpathway of coenzyme A biosynthesis III (mammals)|g__Bacteroides.s__Bacteroides_fragilis	0	0	1.15467e-05	8.50454e-06
COA-PWY-1: superpathway of coenzyme A biosynthesis III (mammals)|g__Bacteroides.s__Bacteroides_galacturonicus	0	0	2.95405e-06	2.17802e-06
COA-PWY-1: superpathway of coenzyme A biosynthesis III (mammals)|g__Bacteroides.s__Bacteroides_stercoris	0	0	1.05478e-06	1.50831e-06
COA-PWY-1: superpathway of coenzyme A biosynthesis III (mammals)|g__Bacteroides.s__Bacteroides_thetaiotaomicron	0	0	2.95525e-06	2.79619e-06
COA-PWY-1: superpathway of coenzyme A biosynthesis III (mammals)|g__Bacteroides.s__Bacteroides_uniformis	0	0	2.46657e-06	2.30048e-06
COA-PWY-1: superpathway of coenzyme A biosynthesis III (mammals)|g__Bacteroides.s__Bacteroides_vulgatus	0	0	1.27099e-05	1.32598e-05
COA-PWY-1: superpathway of coenzyme A biosynthesis III (mammals)|g__Bacteroides.s__Bacteroides_xylanisolvens	0	0	1.46327e-06	1.71082e-06
COA-PWY-1: superpathway of coenzyme A biosynthesis III (mammals)|g__Bifidobacterium.s__Bifidobacterium_longum	0	0	0	5.4514e-07
COA-PWY-1: superpathway of coenzyme A biosynthesis III (mammals)|g__Bilophila.s__Bilophila_wadsworthia	0	0	3.11715e-06	1.91584e-06
COA-PWY-1: superpathway of coenzyme A biosynthesis III (mammals)|g__Blautia.s__Blautia_obeum	0	0	1.09445e-05	6.5959e-06
COA-PWY-1: superpathway of coenzyme A biosynthesis III (mammals)|g__Blautia.s__Blautia_sp_CAG_257	0	0	6.12384e-07	3.77175e-07
COA-PWY-1: superpathway of coenzyme A biosynthesis III (mammals)|g__Blautia.s__Blautia_wexlerae	0	0	3.20036e-06	2.27064e-06
COA-PWY-1: superpathway of coenzyme A biosynthesis III (mammals)|g__Blautia.s__Ruminococcus_torques	0	0	3.93575e-05	2.4705e-05
COA-PWY-1: superpathway of coenzyme A biosynthesis III (mammals)|g__Clostridium.s__Clostridium_bolteae_CAG_59	0	0	0	3.99845e-08
COA-PWY-1: superpathway of coenzyme A biosynthesis III (mammals)|g__Clostridium.s__Clostridium_sp_CAG_58	0	0	0	4.39913e-07
COA-PWY-1: superpathway of coenzyme A biosynthesis III (mammals)|g__Collinsella.s__Collinsella_aerofaciens	0	0	2.19649e-06	1.74017e-06
COA-PWY-1: superpathway of coenzyme A biosynthesis III (mammals)|g__Coprococcus.s__Coprococcus_catus	0	0	6.86129e-07	9.31392e-07
COA-PWY-1: superpathway of coenzyme A biosynthesis III (mammals)|g__Cronobacter.s__Cronobacter_sakazakii	0	0	0	2.3519e-07
COA-PWY-1: superpathway of coenzyme A biosynthesis III (mammals)|g__Dialister.s__Dialister_invisus	0	0	2.11749e-06	1.42705e-06
COA-PWY-1: superpathway of coenzyme A biosynthesis III (mammals)|g__Dorea.s__Dorea_formicigenerans	0	0	4.59817e-06	3.60848e-06
COA-PWY-1: superpathway of coenzyme A biosynthesis III (mammals)|g__Dorea.s__Dorea_longicatena	0	0	2.64324e-06	2.55774e-06
COA-PWY-1: superpathway of coenzyme A biosynthesis III (mammals)|g__Dorea.s__Dorea_sp_CAG_317	0	0	0	2.77141e-07
COA-PWY-1: superpathway of coenzyme A biosynthesis III (mammals)|g__Eubacterium.s__Eubacterium_dolichum_CAG_375	0	0	0	1.93408e-08
COA-PWY-1: superpathway of coenzyme A biosynthesis III (mammals)|g__Eubacterium.s__Eubacterium_hallii	0	0	9.61525e-07	1.17161e-06
COA-PWY-1: superpathway of coenzyme A biosynthesis III (mammals)|g__Eubacterium.s__Eubacterium_ramulus	0	0	1.55132e-06	9.8591e-07
COA-PWY-1: superpathway of coenzyme A biosynthesis III (mammals)|g__Eubacterium.s__Eubacterium_sp_CAG_251	0	0	1.33115e-06	1.31959e-06
COA-PWY-1: superpathway of coenzyme A biosynthesis III (mammals)|g__Eubacterium.s__Eubacterium_sp_CAG_274	0	0	2.27766e-06	1.68153e-06
COA-PWY-1: superpathway of coenzyme A biosynthesis III (mammals)|g__Faecalibacterium.s__Faecalibacterium_prausnitzii	0	0	1.84248e-05	1.97586e-05
COA-PWY-1: superpathway of coenzyme A biosynthesis III (mammals)|g__Firmicutes_unclassified.s__Firmicutes_bacterium_CAG_83	0	0	9.78713e-07	1.27346e-06
COA-PWY-1: superpathway of coenzyme A biosynthesis III (mammals)|g__Flavonifractor.s__Flavonifractor_plautii	0	0	7.21873e-07	4.12717e-07
COA-PWY-1: superpathway of coenzyme A biosynthesis III (mammals)|g__Fusicatenibacter.s__Fusicatenibacter_saccharivorans	0	0	1.63986e-06	1.13893e-06
COA-PWY-1: superpathway of coenzyme A biosynthesis III (mammals)|g__Gemmiger.s__Gemmiger_formicilis	0	0	2.81988e-06	2.46548e-06
COA-PWY-1: superpathway of coenzyme A biosynthesis III (mammals)|g__Haemophilus.s__Haemophilus_parainfluenzae	0	0	3.55457e-06	6.74298e-06
COA-PWY-1: superpathway of coenzyme A biosynthesis III (mammals)|g__Haemophilus.s__Haemophilus_paraphrohaemolyticus	0	0	0	6.48151e-08
COA-PWY-1: superpathway of coenzyme A biosynthesis III (mammals)|g__Haemophilus.s__Haemophilus_sputorum	0	0	0	2.78969e-07
COA-PWY-1: superpathway of coenzyme A biosynthesis III (mammals)|g__Intestinimonas.s__Intestinimonas_butyriciproducens	0	0	0	2.27277e-07
COA-PWY-1: superpathway of coenzyme A biosynthesis III (mammals)|g__Klebsiella.s__Klebsiella_pneumoniae	0	0	5.40147e-06	8.96155e-06
COA-PWY-1: superpathway of coenzyme A biosynthesis III (mammals)|g__Klebsiella.s__Klebsiella_quasipneumoniae	0	0	4.21586e-05	6.81731e-05
COA-PWY-1: superpathway of coenzyme A biosynthesis III (mammals)|g__Klebsiella.s__Klebsiella_variicola	0	0	3.9619e-06	7.02429e-06
COA-PWY-1: superpathway of coenzyme A biosynthesis III (mammals)|g__Lachnoclostridium.s__Clostridium_bolteae	0	0	0	6.99559e-08
COA-PWY-1: superpathway of coenzyme A biosynthesis III (mammals)|g__Lachnospira.s__Lachnospira_pectinoschiza	0	0	2.4744e-06	1.97772e-06
COA-PWY-1: superpathway of coenzyme A biosynthesis III (mammals)|g__Lachnospiraceae_unclassified.s__Eubacterium_rectale	0	0	6.25258e-06	3.55723e-06
COA-PWY-1: superpathway of coenzyme A biosynthesis III (mammals)|g__Lactobacillus.s__Lactobacillus_fermentum	0	0	0	2.89375e-07
COA-PWY-1: superpathway of coenzyme A biosynthesis III (mammals)|g__Lactobacillus.s__Lactobacillus_rogosae	0	0	2.54597e-06	1.99955e-06
COA-PWY-1: superpathway of coenzyme A biosynthesis III (mammals)|g__Lawsonibacter.s__Lawsonibacter_asaccharolyticus	0	0	0	2.04548e-07
COA-PWY-1: superpathway of coenzyme A biosynthesis III (mammals)|g__Megamonas.s__Megamonas_funiformis	0	0	9.36001e-07	1.255e-06
COA-PWY-1: superpathway of coenzyme A biosynthesis III (mammals)|g__Megamonas.s__Megamonas_hypermegale	0	0	4.0887e-07	3.02227e-07
COA-PWY-1: superpathway of coenzyme A biosynthesis III (mammals)|g__Megasphaera.s__Megasphaera_sp_DISK_18	0	0	3.44094e-06	2.10059e-06
COA-PWY-1: superpathway of coenzyme A biosynthesis III (mammals)|g__Odoribacter.s__Odoribacter_splanchnicus	0	0	1.55841e-06	1.59131e-06
COA-PWY-1: superpathway of coenzyme A biosynthesis III (mammals)|g__Parabacteroides.s__Parabacteroides_distasonis	0	0	5.22472e-06	3.13923e-06
COA-PWY-1: superpathway of coenzyme A biosynthesis III (mammals)|g__Parabacteroides.s__Parabacteroides_merdae	0	0	4.04331e-06	4.10528e-06
COA-PWY-1: superpathway of coenzyme A biosynthesis III (mammals)|g__Parasutterella.s__Parasutterella_excrementihominis	0	0	5.63026e-07	3.78007e-07
COA-PWY-1: superpathway of coenzyme A biosynthesis III (mammals)|g__Phascolarctobacterium.s__Phascolarctobacterium_faecium	0	0	5.989e-06	4.78099e-06
COA-PWY-1: superpathway of coenzyme A biosynthesis III (mammals)|g__Roseburia.s__Roseburia_faecis	0	0	1.07456e-05	5.14096e-06
COA-PWY-1: superpathway of coenzyme A biosynthesis III (mammals)|g__Roseburia.s__Roseburia_hominis	0	0	0	1.55322e-07
COA-PWY-1: superpathway of coenzyme A biosynthesis III (mammals)|g__Roseburia.s__Roseburia_inulinivorans	0	0	0	1.42171e-07
COA-PWY-1: superpathway of coenzyme A biosynthesis III (mammals)|g__Ruminococcus.s__Ruminococcus_callidus	0	0	2.8719e-06	1.4316e-07
COA-PWY-1: superpathway of coenzyme A biosynthesis III (mammals)|g__Streptococcus.s__Streptococcus_mitis	0	0	0	1.02096e-07
COA-PWY-1: superpathway of coenzyme A biosynthesis III (mammals)|g__Streptococcus.s__Streptococcus_parasanguinis	0	0	9.51569e-07	1.37246e-06
COA-PWY-1: superpathway of coenzyme A biosynthesis III (mammals)|g__Streptococcus.s__Streptococcus_salivarius	0	0	6.91065e-06	7.72463e-06
COA-PWY-1: superpathway of coenzyme A biosynthesis III (mammals)|g__Veillonella.s__Veillonella_atypica	0	0	5.03545e-07	7.76156e-07
COA-PWY-1: superpathway of coenzyme A biosynthesis III (mammals)|g__Veillonella.s__Veillonella_dispar	0	0	5.15908e-07	6.8134e-07
COA-PWY-1: superpathway of coenzyme A biosynthesis III (mammals)|g__Veillonella.s__Veillonella_infantium	0	0	4.48226e-07	3.96902e-07
COA-PWY-1: superpathway of coenzyme A biosynthesis III (mammals)|g__Veillonella.s__Veillonella_parvula	0	0	0	3.09519e-07
COA-PWY-1: superpathway of coenzyme A biosynthesis III (mammals)|unclassified	0	0	2.99234e-05	0
COA-PWY: coenzyme A biosynthesis I (prokaryotic)	0	0	0.000323875	0.000291064
COA-PWY: coenzyme A biosynthesis I (prokaryotic)|g__Absiella.s__Absiella_dolichum	0	0	0	4.0267e-08
COA-PWY: coenzyme A biosynthesis I (prokaryotic)|g__Acidaminococcus.s__Acidaminococcus_intestini	0	0	3.77075e-06	3.12124e-06
COA-PWY: coenzyme A biosynthesis I (prokaryotic)|g__Actinomyces.s__Actinomyces_sp_ICM47	0	0	0	1.68559e-07
COA-PWY: coenzyme A biosynthesis I (prokaryotic)|g__Agathobaculum.s__Agathobaculum_butyriciproducens	0	0	1.52985e-06	1.15741e-06
COA-PWY: coenzyme A biosynthesis I (prokaryotic)|g__Akkermansia.s__Akkermansia_muciniphila	0	0	3.99033e-06	2.78967e-06
COA-PWY: coenzyme A biosynthesis I (prokaryotic)|g__Alistipes.s__Alistipes_finegoldii	0	0	3.1159e-06	1.93454e-06
COA-PWY: coenzyme A biosynthesis I (prokaryotic)|g__Alistipes.s__Alistipes_putredinis	0	0	1.24006e-05	3.76235e-06
COA-PWY: coenzyme A biosynthesis I (prokaryotic)|g__Anaerostipes.s__Anaerostipes_hadrus	0	0	1.09677e-06	6.94497e-07
COA-PWY: coenzyme A biosynthesis I (prokaryotic)|g__Bacteroides.s__Bacteroides_cellulosilyticus	0	0	1.2954e-05	8.57218e-06
COA-PWY: coenzyme A biosynthesis I (prokaryotic)|g__Bacteroides.s__Bacteroides_dorei	0	0	6.28773e-06	5.53048e-06
COA-PWY: coenzyme A biosynthesis I (prokaryotic)|g__Bacteroides.s__Bacteroides_finegoldii	0	0	4.21499e-07	4.16775e-07
COA-PWY: coenzyme A biosynthesis I (prokaryotic)|g__Bacteroides.s__Bacteroides_fragilis	0	0	9.96644e-06	6.43315e-06
COA-PWY: coenzyme A biosynthesis I (prokaryotic)|g__Bacteroides.s__Bacteroides_galacturonicus	0	0	2.87362e-06	2.38755e-06
COA-PWY: coenzyme A biosynthesis I (prokaryotic)|g__Bacteroides.s__Bacteroides_stercoris	0	0	8.77159e-07	1.1381e-06
COA-PWY: coenzyme A biosynthesis I (prokaryotic)|g__Bacteroides.s__Bacteroides_thetaiotaomicron	0	0	2.89983e-06	2.56865e-06
COA-PWY: coenzyme A biosynthesis I (prokaryotic)|g__Bacteroides.s__Bacteroides_uniformis	0	0	2.46657e-06	1.87895e-06
COA-PWY: coenzyme A biosynthesis I (prokaryotic)|g__Bacteroides.s__Bacteroides_vulgatus	0	0	1.21451e-05	1.27386e-05
COA-PWY: coenzyme A biosynthesis I (prokaryotic)|g__Bacteroides.s__Bacteroides_xylanisolvens	0	0	9.79989e-07	1.21728e-06
COA-PWY: coenzyme A biosynthesis I (prokaryotic)|g__Bilophila.s__Bilophila_wadsworthia	0	0	2.61821e-06	1.84341e-06
COA-PWY: coenzyme A biosynthesis I (prokaryotic)|g__Blautia.s__Blautia_obeum	0	0	1.02542e-05	6.2065e-06
COA-PWY: coenzyme A biosynthesis I (prokaryotic)|g__Blautia.s__Blautia_sp_CAG_257	0	0	5.01795e-07	3.77175e-07
COA-PWY: coenzyme A biosynthesis I (prokaryotic)|g__Blautia.s__Blautia_wexlerae	0	0	3.1558e-06	2.48389e-06
COA-PWY: coenzyme A biosynthesis I (prokaryotic)|g__Blautia.s__Ruminococcus_torques	0	0	4.5804e-05	2.85997e-05
COA-PWY: coenzyme A biosynthesis I (prokaryotic)|g__Clostridium.s__Clostridium_bolteae_CAG_59	0	0	1.4929e-07	4.82687e-08
COA-PWY: coenzyme A biosynthesis I (prokaryotic)|g__Clostridium.s__Clostridium_sp_CAG_58	0	0	0	4.39913e-07
COA-PWY: coenzyme A biosynthesis I (prokaryotic)|g__Collinsella.s__Collinsella_aerofaciens	0	0	1.91732e-06	1.46644e-06
COA-PWY: coenzyme A biosynthesis I (prokaryotic)|g__Cronobacter.s__Cronobacter_sakazakii	0	0	0	3.5894e-07
COA-PWY: coenzyme A biosynthesis I (prokaryotic)|g__Cutibacterium.s__Cutibacterium_acnes	0	0	0	6.33638e-08
COA-PWY: coenzyme A biosynthesis I (prokaryotic)|g__Dialister.s__Dialister_invisus	0	0	1.89066e-06	1.40722e-06
COA-PWY: coenzyme A biosynthesis I (prokaryotic)|g__Dorea.s__Dorea_formicigenerans	0	0	4.3458e-06	3.50804e-06
COA-PWY: coenzyme A biosynthesis I (prokaryotic)|g__Dorea.s__Dorea_longicatena	0	0	4.4207e-06	3.79324e-06
COA-PWY: coenzyme A biosynthesis I (prokaryotic)|g__Eubacterium.s__Eubacterium_dolichum_CAG_375	0	0	0	2.41101e-08
COA-PWY: coenzyme A biosynthesis I (prokaryotic)|g__Eubacterium.s__Eubacterium_hallii	0	0	8.1781e-07	7.28548e-07
COA-PWY: coenzyme A biosynthesis I (prokaryotic)|g__Eubacterium.s__Eubacterium_ramulus	0	0	1.67252e-06	9.86402e-07
COA-PWY: coenzyme A biosynthesis I (prokaryotic)|g__Eubacterium.s__Eubacterium_sp_CAG_274	0	0	2.43069e-06	1.78998e-06
COA-PWY: coenzyme A biosynthesis I (prokaryotic)|g__Faecalibacterium.s__Faecalibacterium_prausnitzii	0	0	1.64239e-05	1.7378e-05
COA-PWY: coenzyme A biosynthesis I (prokaryotic)|g__Flavonifractor.s__Flavonifractor_plautii	0	0	5.45778e-07	3.38472e-07
COA-PWY: coenzyme A biosynthesis I (prokaryotic)|g__Fusicatenibacter.s__Fusicatenibacter_saccharivorans	0	0	1.58464e-06	1.02056e-06
COA-PWY: coenzyme A biosynthesis I (prokaryotic)|g__Gemmiger.s__Gemmiger_formicilis	0	0	2.02146e-06	2.1529e-06
COA-PWY: coenzyme A biosynthesis I (prokaryotic)|g__Haemophilus.s__Haemophilus_parahaemolyticus	0	0	0	4.3063e-08
COA-PWY: coenzyme A biosynthesis I (prokaryotic)|g__Haemophilus.s__Haemophilus_parainfluenzae	0	0	3.19213e-06	6.46688e-06
COA-PWY: coenzyme A biosynthesis I (prokaryotic)|g__Haemophilus.s__Haemophilus_paraphrohaemolyticus	0	0	4.28095e-07	7.76204e-08
COA-PWY: coenzyme A biosynthesis I (prokaryotic)|g__Haemophilus.s__Haemophilus_sputorum	0	0	0	2.38816e-07
COA-PWY: coenzyme A biosynthesis I (prokaryotic)|g__Intestinimonas.s__Intestinimonas_butyriciproducens	0	0	0	1.94631e-07
COA-PWY: coenzyme A biosynthesis I (prokaryotic)|g__Klebsiella.s__Klebsiella_pneumoniae	0	0	3.69004e-06	7.35667e-06
COA-PWY: coenzyme A biosynthesis I (prokaryotic)|g__Klebsiella.s__Klebsiella_quasipneumoniae	0	0	4.8239e-05	9.30757e-05
COA-PWY: coenzyme A biosynthesis I (prokaryotic)|g__Klebsiella.s__Klebsiella_variicola	0	0	4.9909e-06	7.04134e-06
COA-PWY: coenzyme A biosynthesis I (prokaryotic)|g__Lachnoclostridium.s__Clostridium_bolteae	0	0	0	4.62415e-08
COA-PWY: coenzyme A biosynthesis I (prokaryotic)|g__Lachnospira.s__Lachnospira_pectinoschiza	0	0	2.57868e-06	2.24249e-06
COA-PWY: coenzyme A biosynthesis I (prokaryotic)|g__Lachnospiraceae_unclassified.s__Eubacterium_rectale	0	0	6.25258e-06	3.55723e-06
COA-PWY: coenzyme A biosynthesis I (prokaryotic)|g__Lactobacillus.s__Lactobacillus_fermentum	0	0	0	2.43974e-07
COA-PWY: coenzyme A biosynthesis I (prokaryotic)|g__Lactobacillus.s__Lactobacillus_rogosae	0	0	2.27718e-06	1.81162e-06
COA-PWY: coenzyme A biosynthesis I (prokaryotic)|g__Lawsonibacter.s__Lawsonibacter_asaccharolyticus	0	0	0	2.04548e-07
COA-PWY: coenzyme A biosynthesis I (prokaryotic)|g__Megamonas.s__Megamonas_funiformis	0	0	3.29707e-06	2.21165e-06
COA-PWY: coenzyme A biosynthesis I (prokaryotic)|g__Megamonas.s__Megamonas_hypermegale	0	0	4.8216e-06	3.81089e-06
COA-PWY: coenzyme A biosynthesis I (prokaryotic)|g__Megasphaera.s__Megasphaera_sp_DISK_18	0	0	3.44094e-06	2.0844e-06
COA-PWY: coenzyme A biosynthesis I (prokaryotic)|g__Odoribacter.s__Odoribacter_splanchnicus	0	0	1.30804e-06	1.60009e-06
COA-PWY: coenzyme A biosynthesis I (prokaryotic)|g__Parabacteroides.s__Parabacteroides_distasonis	0	0	3.96183e-06	2.69736e-06
COA-PWY: coenzyme A biosynthesis I (prokaryotic)|g__Parabacteroides.s__Parabacteroides_merdae	0	0	3.40688e-06	3.91246e-06
COA-PWY: coenzyme A biosynthesis I (prokaryotic)|g__Phascolarctobacterium.s__Phascolarctobacterium_faecium	0	0	5.56495e-06	4.22515e-06
COA-PWY: coenzyme A biosynthesis I (prokaryotic)|g__Roseburia.s__Roseburia_faecis	0	0	1.06721e-05	4.88442e-06
COA-PWY: coenzyme A biosynthesis I (prokaryotic)|g__Roseburia.s__Roseburia_hominis	0	0	0	1.55322e-07
COA-PWY: coenzyme A biosynthesis I (prokaryotic)|g__Ruminococcus.s__Ruminococcus_callidus	0	0	3.0681e-06	1.41831e-07
COA-PWY: coenzyme A biosynthesis I (prokaryotic)|g__Streptococcus.s__Streptococcus_mitis	0	0	0	7.75631e-08
COA-PWY: coenzyme A biosynthesis I (prokaryotic)|g__Streptococcus.s__Streptococcus_parasanguinis	0	0	9.51569e-07	1.37246e-06
COA-PWY: coenzyme A biosynthesis I (prokaryotic)|g__Streptococcus.s__Streptococcus_salivarius	0	0	5.20769e-06	7.5587e-06
COA-PWY: coenzyme A biosynthesis I (prokaryotic)|g__Turicimonas.s__Turicimonas_muris	0	0	0	7.05268e-08
COA-PWY: coenzyme A biosynthesis I (prokaryotic)|g__Veillonella.s__Veillonella_atypica	0	0	3.93173e-07	7.02208e-07
COA-PWY: coenzyme A biosynthesis I (prokaryotic)|g__Veillonella.s__Veillonella_dispar	0	0	5.69812e-07	6.64054e-07
COA-PWY: coenzyme A biosynthesis I (prokaryotic)|g__Veillonella.s__Veillonella_infantium	0	0	3.89391e-07	3.37946e-07
COA-PWY: coenzyme A biosynthesis I (prokaryotic)|g__Veillonella.s__Veillonella_parvula	0	0	0	3.15772e-07
COA-PWY: coenzyme A biosynthesis I (prokaryotic)|unclassified	0	0	2.0737e-05	0
COBALSYN-PWY: superpathway of adenosylcobalamin salvage from cobinamide I	0	0	0.000244109	0.000265807
COBALSYN-PWY: superpathway of adenosylcobalamin salvage from cobinamide I|g__Bacteroides.s__Bacteroides_cellulosilyticus	0	0	0	1.66937e-06
COBALSYN-PWY: superpathway of adenosylcobalamin salvage from cobinamide I|g__Bacteroides.s__Bacteroides_uniformis	0	0	2.6993e-06	2.01145e-06
COBALSYN-PWY: superpathway of adenosylcobalamin salvage from cobinamide I|g__Blautia.s__Blautia_obeum	0	0	8.32968e-06	4.64041e-06
COBALSYN-PWY: superpathway of adenosylcobalamin salvage from cobinamide I|g__Blautia.s__Blautia_wexlerae	0	0	2.55395e-06	1.901e-06
COBALSYN-PWY: superpathway of adenosylcobalamin salvage from cobinamide I|g__Blautia.s__Ruminococcus_torques	0	0	3.64496e-05	1.93639e-05
COBALSYN-PWY: superpathway of adenosylcobalamin salvage from cobinamide I|g__Collinsella.s__Collinsella_aerofaciens	0	0	8.99565e-07	5.54834e-07
COBALSYN-PWY: superpathway of adenosylcobalamin salvage from cobinamide I|g__Coprococcus.s__Coprococcus_catus	0	0	1.31249e-06	8.47094e-07
COBALSYN-PWY: superpathway of adenosylcobalamin salvage from cobinamide I|g__Dorea.s__Dorea_longicatena	0	0	2.87997e-06	3.09915e-06
COBALSYN-PWY: superpathway of adenosylcobalamin salvage from cobinamide I|g__Eubacterium.s__Eubacterium_hallii	0	0	1.50866e-06	1.37624e-06
COBALSYN-PWY: superpathway of adenosylcobalamin salvage from cobinamide I|g__Faecalibacterium.s__Faecalibacterium_prausnitzii	0	0	3.04452e-06	1.8654e-06
COBALSYN-PWY: superpathway of adenosylcobalamin salvage from cobinamide I|g__Flavonifractor.s__Flavonifractor_plautii	0	0	0	3.03666e-07
COBALSYN-PWY: superpathway of adenosylcobalamin salvage from cobinamide I|g__Gordonibacter.s__Gordonibacter_pamelaeae	0	0	2.1656e-06	1.23854e-06
COBALSYN-PWY: superpathway of adenosylcobalamin salvage from cobinamide I|g__Klebsiella.s__Klebsiella_pneumoniae	0	0	2.8331e-05	4.67784e-05
COBALSYN-PWY: superpathway of adenosylcobalamin salvage from cobinamide I|g__Klebsiella.s__Klebsiella_quasipneumoniae	0	0	3.70696e-05	7.50145e-05
COBALSYN-PWY: superpathway of adenosylcobalamin salvage from cobinamide I|g__Klebsiella.s__Klebsiella_variicola	0	0	3.98043e-06	7.05429e-06
COBALSYN-PWY: superpathway of adenosylcobalamin salvage from cobinamide I|unclassified	0	0	3.75069e-06	0
COLANSYN-PWY: colanic acid building blocks biosynthesis	0	0	0.000128343	0.000160303
COLANSYN-PWY: colanic acid building blocks biosynthesis|g__Cronobacter.s__Cronobacter_sakazakii	0	0	0	5.34249e-07
COLANSYN-PWY: colanic acid building blocks biosynthesis|g__Klebsiella.s__Klebsiella_pneumoniae	0	0	4.46855e-06	7.04278e-06
COLANSYN-PWY: colanic acid building blocks biosynthesis|g__Klebsiella.s__Klebsiella_variicola	0	0	5.77224e-06	1.03457e-05
COLANSYN-PWY: colanic acid building blocks biosynthesis|unclassified	0	0	6.43175e-06	0
COMPLETE-ARO-PWY: superpathway of aromatic amino acid biosynthesis	0	0	0.000374162	0.00036206
COMPLETE-ARO-PWY: superpathway of aromatic amino acid biosynthesis|g__Acidaminococcus.s__Acidaminococcus_intestini	0	0	4.89177e-06	3.96851e-06
COMPLETE-ARO-PWY: superpathway of aromatic amino acid biosynthesis|g__Agathobaculum.s__Agathobaculum_butyriciproducens	0	0	1.80625e-06	1.20569e-06
COMPLETE-ARO-PWY: superpathway of aromatic amino acid biosynthesis|g__Anaerostipes.s__Anaerostipes_hadrus	0	0	8.51682e-07	8.33285e-07
COMPLETE-ARO-PWY: superpathway of aromatic amino acid biosynthesis|g__Bacteroides.s__Bacteroides_cellulosilyticus	0	0	0	1.84217e-06
COMPLETE-ARO-PWY: superpathway of aromatic amino acid biosynthesis|g__Bifidobacterium.s__Bifidobacterium_longum	0	0	3.67758e-07	3.66971e-07
COMPLETE-ARO-PWY: superpathway of aromatic amino acid biosynthesis|g__Blautia.s__Blautia_obeum	0	0	1.21584e-05	8.51769e-06
COMPLETE-ARO-PWY: superpathway of aromatic amino acid biosynthesis|g__Blautia.s__Blautia_wexlerae	0	0	3.35265e-06	2.45446e-06
COMPLETE-ARO-PWY: superpathway of aromatic amino acid biosynthesis|g__Blautia.s__Ruminococcus_torques	0	0	4.95695e-05	2.94635e-05
COMPLETE-ARO-PWY: superpathway of aromatic amino acid biosynthesis|g__Clostridium.s__Clostridium_bolteae_CAG_59	0	0	0	1.12366e-07
COMPLETE-ARO-PWY: superpathway of aromatic amino acid biosynthesis|g__Cronobacter.s__Cronobacter_sakazakii	0	0	0	1.14397e-07
COMPLETE-ARO-PWY: superpathway of aromatic amino acid biosynthesis|g__Dorea.s__Dorea_longicatena	0	0	0	3.76192e-07
COMPLETE-ARO-PWY: superpathway of aromatic amino acid biosynthesis|g__Eubacterium.s__Eubacterium_hallii	0	0	1.68902e-06	1.23245e-06
COMPLETE-ARO-PWY: superpathway of aromatic amino acid biosynthesis|g__Eubacterium.s__Eubacterium_sp_CAG_251	0	0	2.02604e-06	1.5976e-06
COMPLETE-ARO-PWY: superpathway of aromatic amino acid biosynthesis|g__Eubacterium.s__Eubacterium_sp_CAG_274	0	0	1.30695e-06	1.16876e-06
COMPLETE-ARO-PWY: superpathway of aromatic amino acid biosynthesis|g__Faecalibacterium.s__Faecalibacterium_prausnitzii	0	0	0	9.57789e-07
COMPLETE-ARO-PWY: superpathway of aromatic amino acid biosynthesis|g__Fusicatenibacter.s__Fusicatenibacter_saccharivorans	0	0	2.27664e-06	1.22842e-06
COMPLETE-ARO-PWY: superpathway of aromatic amino acid biosynthesis|g__Haemophilus.s__Haemophilus_parainfluenzae	0	0	3.69596e-06	7.19879e-06
COMPLETE-ARO-PWY: superpathway of aromatic amino acid biosynthesis|g__Haemophilus.s__Haemophilus_sputorum	0	0	0	1.85854e-07
COMPLETE-ARO-PWY: superpathway of aromatic amino acid biosynthesis|g__Intestinimonas.s__Intestinimonas_butyriciproducens	0	0	0	2.18735e-07
COMPLETE-ARO-PWY: superpathway of aromatic amino acid biosynthesis|g__Klebsiella.s__Klebsiella_pneumoniae	0	0	1.86987e-05	2.81505e-05
COMPLETE-ARO-PWY: superpathway of aromatic amino acid biosynthesis|g__Klebsiella.s__Klebsiella_quasipneumoniae	0	0	4.16686e-05	7.46812e-05
COMPLETE-ARO-PWY: superpathway of aromatic amino acid biosynthesis|g__Klebsiella.s__Klebsiella_variicola	0	0	6.68339e-06	9.93676e-06
COMPLETE-ARO-PWY: superpathway of aromatic amino acid biosynthesis|g__Lachnospira.s__Lachnospira_pectinoschiza	0	0	3.52525e-06	2.27264e-06
COMPLETE-ARO-PWY: superpathway of aromatic amino acid biosynthesis|g__Lachnospiraceae_unclassified.s__Eubacterium_rectale	0	0	4.63911e-06	3.11139e-06
COMPLETE-ARO-PWY: superpathway of aromatic amino acid biosynthesis|g__Lactobacillus.s__Lactobacillus_rogosae	0	0	2.12047e-06	1.62653e-06
COMPLETE-ARO-PWY: superpathway of aromatic amino acid biosynthesis|g__Megasphaera.s__Megasphaera_sp_DISK_18	0	0	2.97588e-06	1.65401e-06
COMPLETE-ARO-PWY: superpathway of aromatic amino acid biosynthesis|g__Monoglobus.s__Monoglobus_pectinilyticus	0	0	0	5.89767e-08
COMPLETE-ARO-PWY: superpathway of aromatic amino acid biosynthesis|g__Parabacteroides.s__Parabacteroides_distasonis	0	0	4.18181e-06	2.69749e-06
COMPLETE-ARO-PWY: superpathway of aromatic amino acid biosynthesis|g__Parabacteroides.s__Parabacteroides_merdae	0	0	5.07518e-06	4.34698e-06
COMPLETE-ARO-PWY: superpathway of aromatic amino acid biosynthesis|g__Roseburia.s__Roseburia_faecis	0	0	9.92467e-06	5.12318e-06
COMPLETE-ARO-PWY: superpathway of aromatic amino acid biosynthesis|g__Roseburia.s__Roseburia_hominis	0	0	0	1.64799e-07
COMPLETE-ARO-PWY: superpathway of aromatic amino acid biosynthesis|g__Ruminococcus.s__Ruminococcus_callidus	0	0	3.84261e-06	1.79317e-07
COMPLETE-ARO-PWY: superpathway of aromatic amino acid biosynthesis|g__Streptococcus.s__Streptococcus_parasanguinis	0	0	0	8.55928e-07
COMPLETE-ARO-PWY: superpathway of aromatic amino acid biosynthesis|g__Streptococcus.s__Streptococcus_salivarius	0	0	5.61559e-06	8.19375e-06
COMPLETE-ARO-PWY: superpathway of aromatic amino acid biosynthesis|unclassified	0	0	2.18222e-05	0
CRNFORCAT-PWY: creatinine degradation I	0	0	2.61467e-05	3.70562e-05
CRNFORCAT-PWY: creatinine degradation I|g__Klebsiella.s__Klebsiella_pneumoniae	0	0	2.58598e-06	4.7326e-06
CRNFORCAT-PWY: creatinine degradation I|g__Klebsiella.s__Klebsiella_quasipneumoniae	0	0	3.83726e-07	1.38164e-06
CRNFORCAT-PWY: creatinine degradation I|g__Klebsiella.s__Klebsiella_variicola	0	0	3.0595e-06	4.47679e-06
CRNFORCAT-PWY: creatinine degradation I|unclassified	0	0	4.04889e-07	0
DAPLYSINESYN-PWY: L-lysine biosynthesis I	0	0	0.00022938	0.000283232
DAPLYSINESYN-PWY: L-lysine biosynthesis I|g__Actinomyces.s__Actinomyces_sp_ICM47	0	0	0	2.36838e-07
DAPLYSINESYN-PWY: L-lysine biosynthesis I|g__Bifidobacterium.s__Bifidobacterium_longum	0	0	5.34284e-07	5.5628e-07
DAPLYSINESYN-PWY: L-lysine biosynthesis I|g__Cronobacter.s__Cronobacter_sakazakii	0	0	2.04981e-07	5.92939e-07
DAPLYSINESYN-PWY: L-lysine biosynthesis I|g__Haemophilus.s__Haemophilus_parainfluenzae	0	0	3.72123e-06	7.13438e-06
DAPLYSINESYN-PWY: L-lysine biosynthesis I|g__Haemophilus.s__Haemophilus_sputorum	0	0	0	2.24526e-07
DAPLYSINESYN-PWY: L-lysine biosynthesis I|g__Klebsiella.s__Klebsiella_pneumoniae	0	0	1.59533e-05	2.92728e-05
DAPLYSINESYN-PWY: L-lysine biosynthesis I|g__Klebsiella.s__Klebsiella_quasipneumoniae	0	0	3.93666e-05	7.16518e-05
DAPLYSINESYN-PWY: L-lysine biosynthesis I|g__Klebsiella.s__Klebsiella_variicola	0	0	7.00456e-06	1.19046e-05
DAPLYSINESYN-PWY: L-lysine biosynthesis I|unclassified	0	0	2.46122e-06	0
DENITRIFICATION-PWY: nitrate reduction I (denitrification)	0	0	3.78804e-06	6.88106e-06
DENOVOPURINE2-PWY: superpathway of purine nucleotides de novo biosynthesis II	0	0	0.000180172	0.000216685
DENOVOPURINE2-PWY: superpathway of purine nucleotides de novo biosynthesis II|g__Haemophilus.s__Haemophilus_parainfluenzae	0	0	3.59406e-06	6.52193e-06
DENOVOPURINE2-PWY: superpathway of purine nucleotides de novo biosynthesis II|g__Klebsiella.s__Klebsiella_pneumoniae	0	0	1.10566e-05	2.04599e-05
DENOVOPURINE2-PWY: superpathway of purine nucleotides de novo biosynthesis II|g__Klebsiella.s__Klebsiella_quasipneumoniae	0	0	2.25635e-05	4.02584e-05
DENOVOPURINE2-PWY: superpathway of purine nucleotides de novo biosynthesis II|g__Klebsiella.s__Klebsiella_variicola	0	0	3.42123e-06	4.64002e-06
DTDPRHAMSYN-PWY: dTDP-&beta;-L-rhamnose biosynthesis	0	0	0.000365953	0.000270897
DTDPRHAMSYN-PWY: dTDP-&beta;-L-rhamnose biosynthesis|g__Acidaminococcus.s__Acidaminococcus_intestini	0	0	4.99204e-06	3.67788e-06
DTDPRHAMSYN-PWY: dTDP-&beta;-L-rhamnose biosynthesis|g__Actinomyces.s__Actinomyces_sp_ICM47	0	0	0	4.04197e-07
DTDPRHAMSYN-PWY: dTDP-&beta;-L-rhamnose biosynthesis|g__Akkermansia.s__Akkermansia_muciniphila	0	0	3.14675e-06	1.94168e-06
DTDPRHAMSYN-PWY: dTDP-&beta;-L-rhamnose biosynthesis|g__Alistipes.s__Alistipes_finegoldii	0	0	1.03781e-05	6.41826e-06
DTDPRHAMSYN-PWY: dTDP-&beta;-L-rhamnose biosynthesis|g__Alistipes.s__Alistipes_putredinis	0	0	1.04417e-05	3.45083e-06
DTDPRHAMSYN-PWY: dTDP-&beta;-L-rhamnose biosynthesis|g__Alistipes.s__Alistipes_shahii	0	0	1.2082e-05	8.91241e-06
DTDPRHAMSYN-PWY: dTDP-&beta;-L-rhamnose biosynthesis|g__Anaerostipes.s__Anaerostipes_hadrus	0	0	8.50456e-07	6.00179e-07
DTDPRHAMSYN-PWY: dTDP-&beta;-L-rhamnose biosynthesis|g__Bacteroides.s__Bacteroides_cellulosilyticus	0	0	3.08932e-05	2.25556e-05
DTDPRHAMSYN-PWY: dTDP-&beta;-L-rhamnose biosynthesis|g__Bacteroides.s__Bacteroides_dorei	0	0	1.26562e-05	1.20802e-05
DTDPRHAMSYN-PWY: dTDP-&beta;-L-rhamnose biosynthesis|g__Bacteroides.s__Bacteroides_finegoldii	0	0	7.26617e-07	5.98747e-07
DTDPRHAMSYN-PWY: dTDP-&beta;-L-rhamnose biosynthesis|g__Bacteroides.s__Bacteroides_fragilis	0	0	3.74386e-05	3.05424e-05
DTDPRHAMSYN-PWY: dTDP-&beta;-L-rhamnose biosynthesis|g__Bacteroides.s__Bacteroides_galacturonicus	0	0	4.41053e-06	3.53603e-06
DTDPRHAMSYN-PWY: dTDP-&beta;-L-rhamnose biosynthesis|g__Bacteroides.s__Bacteroides_stercoris	0	0	8.35364e-07	1.17316e-06
DTDPRHAMSYN-PWY: dTDP-&beta;-L-rhamnose biosynthesis|g__Bacteroides.s__Bacteroides_thetaiotaomicron	0	0	7.76331e-06	6.69955e-06
DTDPRHAMSYN-PWY: dTDP-&beta;-L-rhamnose biosynthesis|g__Bacteroides.s__Bacteroides_uniformis	0	0	4.65617e-06	3.21431e-06
DTDPRHAMSYN-PWY: dTDP-&beta;-L-rhamnose biosynthesis|g__Bacteroides.s__Bacteroides_vulgatus	0	0	1.1722e-05	1.44785e-05
DTDPRHAMSYN-PWY: dTDP-&beta;-L-rhamnose biosynthesis|g__Bacteroides.s__Bacteroides_xylanisolvens	0	0	1.59769e-06	1.6442e-06
DTDPRHAMSYN-PWY: dTDP-&beta;-L-rhamnose biosynthesis|g__Bifidobacterium.s__Bifidobacterium_longum	0	0	3.20209e-07	5.40497e-07
DTDPRHAMSYN-PWY: dTDP-&beta;-L-rhamnose biosynthesis|g__Bilophila.s__Bilophila_wadsworthia	0	0	1.90414e-06	1.56789e-06
DTDPRHAMSYN-PWY: dTDP-&beta;-L-rhamnose biosynthesis|g__Blautia.s__Blautia_obeum	0	0	1.1733e-05	7.56027e-06
DTDPRHAMSYN-PWY: dTDP-&beta;-L-rhamnose biosynthesis|g__Blautia.s__Blautia_sp_CAG_257	0	0	3.01982e-07	2.26266e-07
DTDPRHAMSYN-PWY: dTDP-&beta;-L-rhamnose biosynthesis|g__Blautia.s__Blautia_wexlerae	0	0	4.81047e-06	3.40302e-06
DTDPRHAMSYN-PWY: dTDP-&beta;-L-rhamnose biosynthesis|g__Blautia.s__Ruminococcus_torques	0	0	2.05064e-05	1.25652e-05
DTDPRHAMSYN-PWY: dTDP-&beta;-L-rhamnose biosynthesis|g__Clostridium.s__Clostridium_bolteae_CAG_59	0	0	0	1.25469e-07
DTDPRHAMSYN-PWY: dTDP-&beta;-L-rhamnose biosynthesis|g__Clostridium.s__Clostridium_sp_CAG_58	0	0	0	5.7859e-07
DTDPRHAMSYN-PWY: dTDP-&beta;-L-rhamnose biosynthesis|g__Collinsella.s__Collinsella_aerofaciens	0	0	4.94968e-06	4.45754e-06
DTDPRHAMSYN-PWY: dTDP-&beta;-L-rhamnose biosynthesis|g__Coprococcus.s__Coprococcus_catus	0	0	1.40916e-06	7.00644e-07
DTDPRHAMSYN-PWY: dTDP-&beta;-L-rhamnose biosynthesis|g__Cronobacter.s__Cronobacter_sakazakii	0	0	0	5.63407e-07
DTDPRHAMSYN-PWY: dTDP-&beta;-L-rhamnose biosynthesis|g__Dorea.s__Dorea_formicigenerans	0	0	5.28692e-06	2.92632e-06
DTDPRHAMSYN-PWY: dTDP-&beta;-L-rhamnose biosynthesis|g__Dorea.s__Dorea_longicatena	0	0	4.82695e-06	4.57337e-06
DTDPRHAMSYN-PWY: dTDP-&beta;-L-rhamnose biosynthesis|g__Eubacterium.s__Eubacterium_hallii	0	0	2.14362e-06	1.64914e-06
DTDPRHAMSYN-PWY: dTDP-&beta;-L-rhamnose biosynthesis|g__Eubacterium.s__Eubacterium_sp_CAG_274	0	0	1.97918e-06	1.61107e-06
DTDPRHAMSYN-PWY: dTDP-&beta;-L-rhamnose biosynthesis|g__Faecalibacterium.s__Faecalibacterium_prausnitzii	0	0	1.43033e-05	1.6144e-05
DTDPRHAMSYN-PWY: dTDP-&beta;-L-rhamnose biosynthesis|g__Fusicatenibacter.s__Fusicatenibacter_saccharivorans	0	0	2.68064e-06	1.76156e-06
DTDPRHAMSYN-PWY: dTDP-&beta;-L-rhamnose biosynthesis|g__Gemmiger.s__Gemmiger_formicilis	0	0	4.5451e-06	2.2096e-06
DTDPRHAMSYN-PWY: dTDP-&beta;-L-rhamnose biosynthesis|g__Klebsiella.s__Klebsiella_pneumoniae	0	0	1.91727e-06	2.11154e-06
DTDPRHAMSYN-PWY: dTDP-&beta;-L-rhamnose biosynthesis|g__Klebsiella.s__Klebsiella_quasipneumoniae	0	0	1.06009e-06	1.28621e-06
DTDPRHAMSYN-PWY: dTDP-&beta;-L-rhamnose biosynthesis|g__Klebsiella.s__Klebsiella_variicola	0	0	2.89113e-06	3.23349e-06
DTDPRHAMSYN-PWY: dTDP-&beta;-L-rhamnose biosynthesis|g__Lachnoclostridium.s__Clostridium_asparagiforme	0	0	0	2.42552e-07
DTDPRHAMSYN-PWY: dTDP-&beta;-L-rhamnose biosynthesis|g__Lachnoclostridium.s__Clostridium_bolteae	0	0	0	1.91694e-07
DTDPRHAMSYN-PWY: dTDP-&beta;-L-rhamnose biosynthesis|g__Lachnoclostridium.s__Clostridium_citroniae	0	0	0	9.07778e-08
DTDPRHAMSYN-PWY: dTDP-&beta;-L-rhamnose biosynthesis|g__Lachnospira.s__Lachnospira_pectinoschiza	0	0	5.33837e-06	4.37407e-06
DTDPRHAMSYN-PWY: dTDP-&beta;-L-rhamnose biosynthesis|g__Lachnospiraceae_unclassified.s__Eubacterium_rectale	0	0	3.75822e-06	2.45561e-06
DTDPRHAMSYN-PWY: dTDP-&beta;-L-rhamnose biosynthesis|g__Lactobacillus.s__Lactobacillus_rogosae	0	0	4.36919e-06	2.66304e-06
DTDPRHAMSYN-PWY: dTDP-&beta;-L-rhamnose biosynthesis|g__Megasphaera.s__Megasphaera_sp_DISK_18	0	0	2.6193e-06	2.79984e-06
DTDPRHAMSYN-PWY: dTDP-&beta;-L-rhamnose biosynthesis|g__Odoribacter.s__Odoribacter_splanchnicus	0	0	3.20077e-06	2.83816e-06
DTDPRHAMSYN-PWY: dTDP-&beta;-L-rhamnose biosynthesis|g__Parabacteroides.s__Parabacteroides_distasonis	0	0	6.26526e-06	4.59325e-06
DTDPRHAMSYN-PWY: dTDP-&beta;-L-rhamnose biosynthesis|g__Parabacteroides.s__Parabacteroides_merdae	0	0	5.20066e-06	3.98521e-06
DTDPRHAMSYN-PWY: dTDP-&beta;-L-rhamnose biosynthesis|g__Roseburia.s__Roseburia_hominis	0	0	0	1.95798e-07
DTDPRHAMSYN-PWY: dTDP-&beta;-L-rhamnose biosynthesis|g__Roseburia.s__Roseburia_inulinivorans	0	0	0	1.86789e-07
DTDPRHAMSYN-PWY: dTDP-&beta;-L-rhamnose biosynthesis|g__Ruthenibacterium.s__Ruthenibacterium_lactatiformans	0	0	0	1.22516e-07
DTDPRHAMSYN-PWY: dTDP-&beta;-L-rhamnose biosynthesis|g__Streptococcus.s__Streptococcus_mitis	0	0	0	1.02109e-08
DTDPRHAMSYN-PWY: dTDP-&beta;-L-rhamnose biosynthesis|g__Streptococcus.s__Streptococcus_parasanguinis	0	0	6.61565e-07	1.08172e-06
DTDPRHAMSYN-PWY: dTDP-&beta;-L-rhamnose biosynthesis|g__Streptococcus.s__Streptococcus_salivarius	0	0	5.88137e-06	7.48374e-06
DTDPRHAMSYN-PWY: dTDP-&beta;-L-rhamnose biosynthesis|g__Turicimonas.s__Turicimonas_muris	0	0	0	5.55762e-08
DTDPRHAMSYN-PWY: dTDP-&beta;-L-rhamnose biosynthesis|g__Veillonella.s__Veillonella_atypica	0	0	6.40528e-07	4.06527e-07
DTDPRHAMSYN-PWY: dTDP-&beta;-L-rhamnose biosynthesis|unclassified	0	0	4.5759e-05	0
ECASYN-PWY: enterobacterial common antigen biosynthesis	0	0	6.44479e-05	9.88344e-05
ECASYN-PWY: enterobacterial common antigen biosynthesis|g__Cronobacter.s__Cronobacter_sakazakii	0	0	0	3.67061e-07
ECASYN-PWY: enterobacterial common antigen biosynthesis|g__Klebsiella.s__Klebsiella_pneumoniae	0	0	5.91844e-06	1.01456e-05
ECASYN-PWY: enterobacterial common antigen biosynthesis|g__Klebsiella.s__Klebsiella_quasipneumoniae	0	0	2.9971e-05	5.59405e-05
ECASYN-PWY: enterobacterial common antigen biosynthesis|g__Klebsiella.s__Klebsiella_variicola	0	0	4.10743e-06	6.39962e-06
FAO-PWY: fatty acid &beta;-oxidation I (generic)	0	0	9.49255e-05	0.000157955
FAO-PWY: fatty acid &beta;-oxidation I (generic)|g__Cronobacter.s__Cronobacter_sakazakii	0	0	3.11779e-07	5.98067e-07
FAO-PWY: fatty acid &beta;-oxidation I (generic)|g__Klebsiella.s__Klebsiella_pneumoniae	0	0	2.14395e-05	3.39005e-05
FAO-PWY: fatty acid &beta;-oxidation I (generic)|g__Klebsiella.s__Klebsiella_quasipneumoniae	0	0	5.31698e-05	9.67369e-05
FAO-PWY: fatty acid &beta;-oxidation I (generic)|g__Klebsiella.s__Klebsiella_variicola	0	0	9.1269e-06	1.24994e-05
FASYN-ELONG-PWY: fatty acid elongation -- saturated	0	0	0.000212746	0.000288312
FASYN-ELONG-PWY: fatty acid elongation -- saturated|g__Alistipes.s__Alistipes_finegoldii	0	0	2.64682e-06	1.41417e-06
FASYN-ELONG-PWY: fatty acid elongation -- saturated|g__Bacteroides.s__Bacteroides_cellulosilyticus	0	0	0	2.63018e-07
FASYN-ELONG-PWY: fatty acid elongation -- saturated|g__Bifidobacterium.s__Bifidobacterium_longum	0	0	0	1.96378e-07
FASYN-ELONG-PWY: fatty acid elongation -- saturated|g__Cronobacter.s__Cronobacter_sakazakii	0	0	0	4.73826e-07
FASYN-ELONG-PWY: fatty acid elongation -- saturated|g__Haemophilus.s__Haemophilus_parainfluenzae	0	0	4.81332e-06	1.08007e-05
FASYN-ELONG-PWY: fatty acid elongation -- saturated|g__Klebsiella.s__Klebsiella_pneumoniae	0	0	7.33177e-06	1.76572e-05
FASYN-ELONG-PWY: fatty acid elongation -- saturated|g__Klebsiella.s__Klebsiella_quasipneumoniae	0	0	6.13478e-05	0.000113126
FASYN-ELONG-PWY: fatty acid elongation -- saturated|g__Klebsiella.s__Klebsiella_variicola	0	0	1.08984e-05	1.8457e-05
FASYN-ELONG-PWY: fatty acid elongation -- saturated|unclassified	0	0	1.0472e-06	0
FASYN-INITIAL-PWY: superpathway of fatty acid biosynthesis initiation (E. coli)	0	0	0.000342408	0.000306962
FASYN-INITIAL-PWY: superpathway of fatty acid biosynthesis initiation (E. coli)|g__Agathobaculum.s__Agathobaculum_butyriciproducens	0	0	2.38734e-06	1.33936e-06
FASYN-INITIAL-PWY: superpathway of fatty acid biosynthesis initiation (E. coli)|g__Anaerostipes.s__Anaerostipes_hadrus	0	0	8.01871e-07	6.2363e-07
FASYN-INITIAL-PWY: superpathway of fatty acid biosynthesis initiation (E. coli)|g__Bacteroides.s__Bacteroides_cellulosilyticus	0	0	7.29399e-07	1.9644e-06
FASYN-INITIAL-PWY: superpathway of fatty acid biosynthesis initiation (E. coli)|g__Bacteroides.s__Bacteroides_dorei	0	0	8.51619e-06	7.71498e-06
FASYN-INITIAL-PWY: superpathway of fatty acid biosynthesis initiation (E. coli)|g__Bacteroides.s__Bacteroides_finegoldii	0	0	2.66223e-07	4.44458e-07
FASYN-INITIAL-PWY: superpathway of fatty acid biosynthesis initiation (E. coli)|g__Bacteroides.s__Bacteroides_fragilis	0	0	1.68676e-05	1.28004e-05
FASYN-INITIAL-PWY: superpathway of fatty acid biosynthesis initiation (E. coli)|g__Bacteroides.s__Bacteroides_galacturonicus	0	0	3.00771e-06	2.21223e-06
FASYN-INITIAL-PWY: superpathway of fatty acid biosynthesis initiation (E. coli)|g__Bacteroides.s__Bacteroides_thetaiotaomicron	0	0	4.48042e-06	3.29718e-06
FASYN-INITIAL-PWY: superpathway of fatty acid biosynthesis initiation (E. coli)|g__Bacteroides.s__Bacteroides_uniformis	0	0	2.92685e-06	2.37817e-06
FASYN-INITIAL-PWY: superpathway of fatty acid biosynthesis initiation (E. coli)|g__Bacteroides.s__Bacteroides_vulgatus	0	0	1.63683e-05	1.84979e-05
FASYN-INITIAL-PWY: superpathway of fatty acid biosynthesis initiation (E. coli)|g__Bacteroides.s__Bacteroides_xylanisolvens	0	0	2.24546e-06	2.28478e-06
FASYN-INITIAL-PWY: superpathway of fatty acid biosynthesis initiation (E. coli)|g__Blautia.s__Blautia_obeum	0	0	8.61802e-06	6.86665e-06
FASYN-INITIAL-PWY: superpathway of fatty acid biosynthesis initiation (E. coli)|g__Blautia.s__Blautia_sp_CAG_257	0	0	0	5.58552e-07
FASYN-INITIAL-PWY: superpathway of fatty acid biosynthesis initiation (E. coli)|g__Blautia.s__Ruminococcus_torques	0	0	4.78953e-05	2.87896e-05
FASYN-INITIAL-PWY: superpathway of fatty acid biosynthesis initiation (E. coli)|g__Clostridium.s__Clostridium_bolteae_CAG_59	0	0	0	1.28349e-07
FASYN-INITIAL-PWY: superpathway of fatty acid biosynthesis initiation (E. coli)|g__Clostridium.s__Clostridium_sp_CAG_58	0	0	5.44071e-07	6.60911e-07
FASYN-INITIAL-PWY: superpathway of fatty acid biosynthesis initiation (E. coli)|g__Coprococcus.s__Coprococcus_catus	0	0	5.26111e-07	6.54956e-07
FASYN-INITIAL-PWY: superpathway of fatty acid biosynthesis initiation (E. coli)|g__Cronobacter.s__Cronobacter_sakazakii	0	0	0	1.70469e-07
FASYN-INITIAL-PWY: superpathway of fatty acid biosynthesis initiation (E. coli)|g__Dorea.s__Dorea_formicigenerans	0	0	6.1148e-06	3.94853e-06
FASYN-INITIAL-PWY: superpathway of fatty acid biosynthesis initiation (E. coli)|g__Dorea.s__Dorea_longicatena	0	0	1.9962e-06	2.27938e-06
FASYN-INITIAL-PWY: superpathway of fatty acid biosynthesis initiation (E. coli)|g__Eubacterium.s__Eubacterium_hallii	0	0	1.4264e-06	1.19829e-06
FASYN-INITIAL-PWY: superpathway of fatty acid biosynthesis initiation (E. coli)|g__Eubacterium.s__Eubacterium_ramulus	0	0	1.58695e-06	8.22251e-07
FASYN-INITIAL-PWY: superpathway of fatty acid biosynthesis initiation (E. coli)|g__Faecalibacterium.s__Faecalibacterium_prausnitzii	0	0	7.93238e-07	1.03181e-06
FASYN-INITIAL-PWY: superpathway of fatty acid biosynthesis initiation (E. coli)|g__Flavonifractor.s__Flavonifractor_plautii	0	0	5.14049e-07	2.489e-07
FASYN-INITIAL-PWY: superpathway of fatty acid biosynthesis initiation (E. coli)|g__Fusicatenibacter.s__Fusicatenibacter_saccharivorans	0	0	1.95767e-06	1.24132e-06
FASYN-INITIAL-PWY: superpathway of fatty acid biosynthesis initiation (E. coli)|g__Haemophilus.s__Haemophilus_parainfluenzae	0	0	3.40383e-06	6.94684e-06
FASYN-INITIAL-PWY: superpathway of fatty acid biosynthesis initiation (E. coli)|g__Intestinimonas.s__Intestinimonas_butyriciproducens	0	0	2.41573e-07	0
FASYN-INITIAL-PWY: superpathway of fatty acid biosynthesis initiation (E. coli)|g__Klebsiella.s__Klebsiella_pneumoniae	0	0	1.48254e-06	7.63872e-06
FASYN-INITIAL-PWY: superpathway of fatty acid biosynthesis initiation (E. coli)|g__Klebsiella.s__Klebsiella_quasipneumoniae	0	0	2.43073e-05	4.14108e-05
FASYN-INITIAL-PWY: superpathway of fatty acid biosynthesis initiation (E. coli)|g__Klebsiella.s__Klebsiella_variicola	0	0	5.50611e-06	8.47522e-06
FASYN-INITIAL-PWY: superpathway of fatty acid biosynthesis initiation (E. coli)|g__Lachnoclostridium.s__Clostridium_bolteae	0	0	0	1.4183e-07
FASYN-INITIAL-PWY: superpathway of fatty acid biosynthesis initiation (E. coli)|g__Lachnospira.s__Lachnospira_pectinoschiza	0	0	3.62577e-06	2.49476e-06
FASYN-INITIAL-PWY: superpathway of fatty acid biosynthesis initiation (E. coli)|g__Lactobacillus.s__Lactobacillus_fermentum	0	0	0	3.39995e-07
FASYN-INITIAL-PWY: superpathway of fatty acid biosynthesis initiation (E. coli)|g__Lactobacillus.s__Lactobacillus_rogosae	0	0	3.13333e-06	2.44857e-06
FASYN-INITIAL-PWY: superpathway of fatty acid biosynthesis initiation (E. coli)|g__Lawsonibacter.s__Lawsonibacter_asaccharolyticus	0	0	0	1.06217e-07
FASYN-INITIAL-PWY: superpathway of fatty acid biosynthesis initiation (E. coli)|g__Parabacteroides.s__Parabacteroides_distasonis	0	0	5.40922e-06	3.5044e-06
FASYN-INITIAL-PWY: superpathway of fatty acid biosynthesis initiation (E. coli)|g__Parabacteroides.s__Parabacteroides_merdae	0	0	5.21519e-06	4.28201e-06
FASYN-INITIAL-PWY: superpathway of fatty acid biosynthesis initiation (E. coli)|g__Parasutterella.s__Parasutterella_excrementihominis	0	0	0	2.86895e-07
FASYN-INITIAL-PWY: superpathway of fatty acid biosynthesis initiation (E. coli)|g__Ruminococcus.s__Ruminococcus_callidus	0	0	3.84553e-06	2.97764e-07
FASYN-INITIAL-PWY: superpathway of fatty acid biosynthesis initiation (E. coli)|g__Streptococcus.s__Streptococcus_salivarius	0	0	2.24145e-06	2.8477e-06
FASYN-INITIAL-PWY: superpathway of fatty acid biosynthesis initiation (E. coli)|g__Veillonella.s__Veillonella_atypica	0	0	5.75153e-07	8.0296e-07
FASYN-INITIAL-PWY: superpathway of fatty acid biosynthesis initiation (E. coli)|g__Veillonella.s__Veillonella_dispar	0	0	1.82632e-07	9.53847e-08
FASYN-INITIAL-PWY: superpathway of fatty acid biosynthesis initiation (E. coli)|g__Veillonella.s__Veillonella_infantium	0	0	2.62575e-07	3.07713e-07
FASYN-INITIAL-PWY: superpathway of fatty acid biosynthesis initiation (E. coli)|g__Veillonella.s__Veillonella_parvula	0	0	0	3.58301e-07
FASYN-INITIAL-PWY: superpathway of fatty acid biosynthesis initiation (E. coli)|unclassified	0	0	1.40227e-05	0
FERMENTATION-PWY: mixed acid fermentation	0	0	0.000167668	0.000255159
FERMENTATION-PWY: mixed acid fermentation|g__Cronobacter.s__Cronobacter_sakazakii	0	0	0	5.13075e-07
FERMENTATION-PWY: mixed acid fermentation|g__Haemophilus.s__Haemophilus_parahaemolyticus	0	0	0	7.73082e-08
FERMENTATION-PWY: mixed acid fermentation|g__Haemophilus.s__Haemophilus_parainfluenzae	0	0	3.40781e-06	6.80799e-06
FERMENTATION-PWY: mixed acid fermentation|g__Haemophilus.s__Haemophilus_paraphrohaemolyticus	0	0	0	4.34558e-08
FERMENTATION-PWY: mixed acid fermentation|g__Klebsiella.s__Klebsiella_pneumoniae	0	0	3.30317e-05	6.1645e-05
FERMENTATION-PWY: mixed acid fermentation|g__Klebsiella.s__Klebsiella_quasipneumoniae	0	0	5.19e-05	9.8857e-05
FERMENTATION-PWY: mixed acid fermentation|g__Klebsiella.s__Klebsiella_variicola	0	0	1.01032e-05	1.81671e-05
FERMENTATION-PWY: mixed acid fermentation|unclassified	0	0	3.88758e-06	0
FOLSYN-PWY: superpathway of tetrahydrofolate biosynthesis and salvage	0	0	9.11112e-05	8.0632e-05
FOLSYN-PWY: superpathway of tetrahydrofolate biosynthesis and salvage|g__Cronobacter.s__Cronobacter_sakazakii	0	0	0	2.23851e-07
FOLSYN-PWY: superpathway of tetrahydrofolate biosynthesis and salvage|g__Streptococcus.s__Streptococcus_salivarius	0	0	3.71375e-06	4.93354e-06
FUC-RHAMCAT-PWY: superpathway of fucose and rhamnose degradation	0	0	0.00014604	0.00020846
FUC-RHAMCAT-PWY: superpathway of fucose and rhamnose degradation|g__Klebsiella.s__Klebsiella_pneumoniae	0	0	3.56436e-05	6.12214e-05
FUC-RHAMCAT-PWY: superpathway of fucose and rhamnose degradation|g__Klebsiella.s__Klebsiella_variicola	0	0	6.85507e-06	1.16651e-05
FUC-RHAMCAT-PWY: superpathway of fucose and rhamnose degradation|unclassified	0	0	1.634e-06	0
FUCCAT-PWY: fucose degradation	0	0	0.000127742	0.000209687
FUCCAT-PWY: fucose degradation|g__Blautia.s__Ruminococcus_torques	0	0	8.35244e-06	4.95177e-06
FUCCAT-PWY: fucose degradation|g__Haemophilus.s__Haemophilus_parahaemolyticus	0	0	1.40113e-07	1.23024e-07
FUCCAT-PWY: fucose degradation|g__Haemophilus.s__Haemophilus_parainfluenzae	0	0	0	6.10515e-07
FUCCAT-PWY: fucose degradation|g__Haemophilus.s__Haemophilus_paraphrohaemolyticus	0	0	4.74036e-07	1.66486e-07
FUCCAT-PWY: fucose degradation|g__Haemophilus.s__Haemophilus_sputorum	0	0	0	2.64649e-07
FUCCAT-PWY: fucose degradation|g__Klebsiella.s__Klebsiella_pneumoniae	0	0	4.42967e-05	8.58402e-05
FUCCAT-PWY: fucose degradation|g__Klebsiella.s__Klebsiella_quasipneumoniae	0	0	3.03666e-07	3.78833e-07
FUCCAT-PWY: fucose degradation|g__Klebsiella.s__Klebsiella_variicola	0	0	6.23457e-06	1.14315e-05
FUCCAT-PWY: fucose degradation|unclassified	0	0	1.08311e-06	0
GALACT-GLUCUROCAT-PWY: superpathway of hexuronide and hexuronate degradation	0	0	4.8776e-05	4.94999e-05
GALACT-GLUCUROCAT-PWY: superpathway of hexuronide and hexuronate degradation|g__Cronobacter.s__Cronobacter_sakazakii	0	0	0	5.70889e-07
GALACT-GLUCUROCAT-PWY: superpathway of hexuronide and hexuronate degradation|g__Intestinimonas.s__Intestinimonas_butyriciproducens	0	0	0	2.39665e-07
GALACTARDEG-PWY: D-galactarate degradation I	0	0	9.09329e-05	0.000143146
GALACTARDEG-PWY: D-galactarate degradation I|g__Flavonifractor.s__Flavonifractor_plautii	0	0	6.98405e-07	4.16612e-07
GALACTARDEG-PWY: D-galactarate degradation I|g__Klebsiella.s__Klebsiella_pneumoniae	0	0	1.24584e-05	2.13504e-05
GALACTARDEG-PWY: D-galactarate degradation I|g__Klebsiella.s__Klebsiella_quasipneumoniae	0	0	5.4431e-05	9.42768e-05
GALACTARDEG-PWY: D-galactarate degradation I|g__Klebsiella.s__Klebsiella_variicola	0	0	5.23417e-06	9.91379e-06
GALACTARDEG-PWY: D-galactarate degradation I|g__Lachnoclostridium.s__Clostridium_citroniae	0	0	0	5.45422e-08
GALACTUROCAT-PWY: D-galacturonate degradation I	0	0	7.92144e-05	7.69385e-05
GALACTUROCAT-PWY: D-galacturonate degradation I|g__Alistipes.s__Alistipes_shahii	0	0	9.08515e-06	6.62705e-06
GALACTUROCAT-PWY: D-galacturonate degradation I|g__Clostridium.s__Clostridium_sp_CAG_58	0	0	6.30818e-07	4.78533e-07
GALACTUROCAT-PWY: D-galacturonate degradation I|g__Cronobacter.s__Cronobacter_sakazakii	0	0	0	5.77552e-07
GALACTUROCAT-PWY: D-galacturonate degradation I|g__Faecalibacterium.s__Faecalibacterium_prausnitzii	0	0	3.28314e-06	3.1288e-06
GALACTUROCAT-PWY: D-galacturonate degradation I|g__Intestinimonas.s__Intestinimonas_butyriciproducens	0	0	0	2.49377e-07
GLCMANNANAUT-PWY: superpathway of N-acetylglucosamine, N-acetylmannosamine and N-acetylneuraminate degradation	0	0	0.000138166	0.000170102
GLCMANNANAUT-PWY: superpathway of N-acetylglucosamine, N-acetylmannosamine and N-acetylneuraminate degradation|g__Blautia.s__Blautia_obeum	0	0	0	2.05696e-07
GLCMANNANAUT-PWY: superpathway of N-acetylglucosamine, N-acetylmannosamine and N-acetylneuraminate degradation|g__Blautia.s__Blautia_wexlerae	0	0	0	1.01775e-07
GLCMANNANAUT-PWY: superpathway of N-acetylglucosamine, N-acetylmannosamine and N-acetylneuraminate degradation|g__Cronobacter.s__Cronobacter_sakazakii	0	0	0	4.76161e-07
GLCMANNANAUT-PWY: superpathway of N-acetylglucosamine, N-acetylmannosamine and N-acetylneuraminate degradation|g__Faecalibacterium.s__Faecalibacterium_prausnitzii	0	0	8.05012e-06	8.71372e-06
GLCMANNANAUT-PWY: superpathway of N-acetylglucosamine, N-acetylmannosamine and N-acetylneuraminate degradation|g__Haemophilus.s__Haemophilus_parahaemolyticus	0	0	0	2.71772e-08
GLCMANNANAUT-PWY: superpathway of N-acetylglucosamine, N-acetylmannosamine and N-acetylneuraminate degradation|g__Haemophilus.s__Haemophilus_parainfluenzae	0	0	4.19774e-06	6.66621e-06
GLCMANNANAUT-PWY: superpathway of N-acetylglucosamine, N-acetylmannosamine and N-acetylneuraminate degradation|g__Haemophilus.s__Haemophilus_sputorum	0	0	0	2.65059e-07
GLCMANNANAUT-PWY: superpathway of N-acetylglucosamine, N-acetylmannosamine and N-acetylneuraminate degradation|g__Intestinimonas.s__Intestinimonas_butyriciproducens	0	0	0	2.03712e-07
GLCMANNANAUT-PWY: superpathway of N-acetylglucosamine, N-acetylmannosamine and N-acetylneuraminate degradation|g__Klebsiella.s__Klebsiella_pneumoniae	0	0	1.65529e-05	3.31708e-05
GLCMANNANAUT-PWY: superpathway of N-acetylglucosamine, N-acetylmannosamine and N-acetylneuraminate degradation|g__Klebsiella.s__Klebsiella_quasipneumoniae	0	0	6.27525e-06	1.19727e-05
GLCMANNANAUT-PWY: superpathway of N-acetylglucosamine, N-acetylmannosamine and N-acetylneuraminate degradation|g__Klebsiella.s__Klebsiella_variicola	0	0	2.11848e-06	5.28345e-06
GLCMANNANAUT-PWY: superpathway of N-acetylglucosamine, N-acetylmannosamine and N-acetylneuraminate degradation|g__Lachnoclostridium.s__Clostridium_asparagiforme	0	0	0	1.71401e-07
GLCMANNANAUT-PWY: superpathway of N-acetylglucosamine, N-acetylmannosamine and N-acetylneuraminate degradation|g__Roseburia.s__Roseburia_inulinivorans	0	0	0	3.04496e-07
GLCMANNANAUT-PWY: superpathway of N-acetylglucosamine, N-acetylmannosamine and N-acetylneuraminate degradation|unclassified	0	0	4.38189e-06	0
GLUCARDEG-PWY: D-glucarate degradation I	0	0	7.6667e-05	0.000120209
GLUCARDEG-PWY: D-glucarate degradation I|g__Klebsiella.s__Klebsiella_pneumoniae	0	0	1.15946e-05	2.02899e-05
GLUCARDEG-PWY: D-glucarate degradation I|g__Klebsiella.s__Klebsiella_quasipneumoniae	0	0	4.12811e-05	7.16078e-05
GLUCARDEG-PWY: D-glucarate degradation I|g__Klebsiella.s__Klebsiella_variicola	0	0	4.53929e-06	8.68427e-06
GLUCARDEG-PWY: D-glucarate degradation I|g__Lachnoclostridium.s__Clostridium_citroniae	0	0	0	7.38921e-08
GLUCARGALACTSUPER-PWY: superpathway of D-glucarate and D-galactarate degradation	0	0	9.09329e-05	0.000143146
GLUCARGALACTSUPER-PWY: superpathway of D-glucarate and D-galactarate degradation|g__Flavonifractor.s__Flavonifractor_plautii	0	0	6.98405e-07	4.16612e-07
GLUCARGALACTSUPER-PWY: superpathway of D-glucarate and D-galactarate degradation|g__Klebsiella.s__Klebsiella_pneumoniae	0	0	1.24584e-05	2.13504e-05
GLUCARGALACTSUPER-PWY: superpathway of D-glucarate and D-galactarate degradation|g__Klebsiella.s__Klebsiella_quasipneumoniae	0	0	5.4431e-05	9.42768e-05
GLUCARGALACTSUPER-PWY: superpathway of D-glucarate and D-galactarate degradation|g__Klebsiella.s__Klebsiella_variicola	0	0	5.23417e-06	9.91379e-06
GLUCARGALACTSUPER-PWY: superpathway of D-glucarate and D-galactarate degradation|g__Lachnoclostridium.s__Clostridium_citroniae	0	0	0	5.45422e-08
GLUCONEO-PWY: gluconeogenesis I	0	0	0.000288366	0.000344564
GLUCONEO-PWY: gluconeogenesis I|g__Bacteroides.s__Bacteroides_cellulosilyticus	0	0	3.27121e-07	9.21298e-07
GLUCONEO-PWY: gluconeogenesis I|g__Bacteroides.s__Bacteroides_fragilis	0	0	9.94567e-06	7.51435e-06
GLUCONEO-PWY: gluconeogenesis I|g__Cronobacter.s__Cronobacter_sakazakii	0	0	1.39916e-07	6.44074e-07
GLUCONEO-PWY: gluconeogenesis I|g__Haemophilus.s__Haemophilus_parainfluenzae	0	0	3.63799e-06	6.97989e-06
GLUCONEO-PWY: gluconeogenesis I|g__Klebsiella.s__Klebsiella_pneumoniae	0	0	3.62953e-05	6.38768e-05
GLUCONEO-PWY: gluconeogenesis I|g__Klebsiella.s__Klebsiella_quasipneumoniae	0	0	4.30794e-05	8.17229e-05
GLUCONEO-PWY: gluconeogenesis I|g__Klebsiella.s__Klebsiella_variicola	0	0	1.03845e-05	1.74311e-05
GLUCONEO-PWY: gluconeogenesis I|unclassified	0	0	2.2534e-06	0
GLUCOSE1PMETAB-PWY: glucose and glucose-1-phosphate degradation	0	0	0.000152645	0.000221316
GLUCOSE1PMETAB-PWY: glucose and glucose-1-phosphate degradation|g__Bifidobacterium.s__Bifidobacterium_longum	0	0	6.32113e-07	4.03768e-07
GLUCOSE1PMETAB-PWY: glucose and glucose-1-phosphate degradation|g__Klebsiella.s__Klebsiella_pneumoniae	0	0	5.8422e-05	0.000114991
GLUCOSE1PMETAB-PWY: glucose and glucose-1-phosphate degradation|g__Klebsiella.s__Klebsiella_quasipneumoniae	0	0	4.26106e-05	8.37945e-05
GLUCOSE1PMETAB-PWY: glucose and glucose-1-phosphate degradation|g__Klebsiella.s__Klebsiella_variicola	0	0	7.38024e-06	1.61574e-05
GLUCOSE1PMETAB-PWY: glucose and glucose-1-phosphate degradation|unclassified	0	0	3.3058e-06	0
GLUCUROCAT-PWY: superpathway of &beta;-D-glucuronosides degradation	0	0	3.74745e-05	3.61356e-05
GLUCUROCAT-PWY: superpathway of &beta;-D-glucuronosides degradation|g__Bacteroides.s__Bacteroides_fragilis	0	0	1.08176e-06	8.12098e-07
GLUCUROCAT-PWY: superpathway of &beta;-D-glucuronosides degradation|g__Cronobacter.s__Cronobacter_sakazakii	0	0	0	5.94193e-07
GLUCUROCAT-PWY: superpathway of &beta;-D-glucuronosides degradation|g__Faecalibacterium.s__Faecalibacterium_prausnitzii	0	0	2.85605e-06	2.59586e-06
GLUCUROCAT-PWY: superpathway of &beta;-D-glucuronosides degradation|g__Intestinimonas.s__Intestinimonas_butyriciproducens	0	0	0	2.64035e-07
GLUDEG-I-PWY: GABA shunt	0	0	8.42813e-05	9.15309e-05
GLUDEG-I-PWY: GABA shunt|g__Klebsiella.s__Klebsiella_pneumoniae	0	0	5.46004e-07	4.24271e-06
GLUTORN-PWY: L-ornithine biosynthesis I	0	0	0.000330275	0.00034492
GLUTORN-PWY: L-ornithine biosynthesis I|g__Agathobaculum.s__Agathobaculum_butyriciproducens	0	0	1.24733e-06	8.66902e-07
GLUTORN-PWY: L-ornithine biosynthesis I|g__Alistipes.s__Alistipes_finegoldii	0	0	2.4618e-06	1.61226e-06
GLUTORN-PWY: L-ornithine biosynthesis I|g__Anaerostipes.s__Anaerostipes_hadrus	0	0	5.66921e-07	5.18149e-07
GLUTORN-PWY: L-ornithine biosynthesis I|g__Bacteroides.s__Bacteroides_galacturonicus	0	0	3.14311e-06	2.39873e-06
GLUTORN-PWY: L-ornithine biosynthesis I|g__Bifidobacterium.s__Bifidobacterium_longum	0	0	3.77152e-07	6.20903e-07
GLUTORN-PWY: L-ornithine biosynthesis I|g__Blautia.s__Blautia_obeum	0	0	4.42216e-06	3.78942e-06
GLUTORN-PWY: L-ornithine biosynthesis I|g__Blautia.s__Blautia_sp_CAG_257	0	0	4.19273e-07	3.17404e-07
GLUTORN-PWY: L-ornithine biosynthesis I|g__Blautia.s__Blautia_wexlerae	0	0	3.90826e-06	2.96315e-06
GLUTORN-PWY: L-ornithine biosynthesis I|g__Blautia.s__Ruminococcus_torques	0	0	4.40321e-05	2.82845e-05
GLUTORN-PWY: L-ornithine biosynthesis I|g__Clostridium.s__Clostridium_bolteae_CAG_59	0	0	0	4.91643e-08
GLUTORN-PWY: L-ornithine biosynthesis I|g__Collinsella.s__Collinsella_aerofaciens	0	0	2.12004e-06	1.66391e-06
GLUTORN-PWY: L-ornithine biosynthesis I|g__Coprococcus.s__Coprococcus_catus	0	0	1.37944e-06	8.27348e-07
GLUTORN-PWY: L-ornithine biosynthesis I|g__Cronobacter.s__Cronobacter_sakazakii	0	0	0	5.04595e-07
GLUTORN-PWY: L-ornithine biosynthesis I|g__Dorea.s__Dorea_formicigenerans	0	0	4.57141e-06	3.37332e-06
GLUTORN-PWY: L-ornithine biosynthesis I|g__Dorea.s__Dorea_longicatena	0	0	3.20805e-06	2.75239e-06
GLUTORN-PWY: L-ornithine biosynthesis I|g__Dorea.s__Dorea_sp_CAG_317	0	0	3.25615e-07	3.52838e-07
GLUTORN-PWY: L-ornithine biosynthesis I|g__Eubacterium.s__Eubacterium_hallii	0	0	1.29418e-06	9.93546e-07
GLUTORN-PWY: L-ornithine biosynthesis I|g__Eubacterium.s__Eubacterium_ramulus	0	0	0	5.21301e-07
GLUTORN-PWY: L-ornithine biosynthesis I|g__Eubacterium.s__Eubacterium_sp_CAG_274	0	0	2.07379e-06	1.82726e-06
GLUTORN-PWY: L-ornithine biosynthesis I|g__Faecalibacterium.s__Faecalibacterium_prausnitzii	0	0	1.87531e-05	1.89903e-05
GLUTORN-PWY: L-ornithine biosynthesis I|g__Flavonifractor.s__Flavonifractor_plautii	0	0	4.58005e-07	2.5445e-07
GLUTORN-PWY: L-ornithine biosynthesis I|g__Fusicatenibacter.s__Fusicatenibacter_saccharivorans	0	0	2.82188e-06	1.43392e-06
GLUTORN-PWY: L-ornithine biosynthesis I|g__Gemmiger.s__Gemmiger_formicilis	0	0	2.44114e-06	1.94512e-06
GLUTORN-PWY: L-ornithine biosynthesis I|g__Haemophilus.s__Haemophilus_parahaemolyticus	0	0	0	5.18569e-08
GLUTORN-PWY: L-ornithine biosynthesis I|g__Haemophilus.s__Haemophilus_paraphrohaemolyticus	0	0	0	5.24641e-08
GLUTORN-PWY: L-ornithine biosynthesis I|g__Haemophilus.s__Haemophilus_sputorum	0	0	0	1.75912e-07
GLUTORN-PWY: L-ornithine biosynthesis I|g__Intestinimonas.s__Intestinimonas_butyriciproducens	0	0	0	1.90241e-07
GLUTORN-PWY: L-ornithine biosynthesis I|g__Klebsiella.s__Klebsiella_pneumoniae	0	0	4.7291e-05	8.54419e-05
GLUTORN-PWY: L-ornithine biosynthesis I|g__Klebsiella.s__Klebsiella_quasipneumoniae	0	0	2.12831e-05	4.18786e-05
GLUTORN-PWY: L-ornithine biosynthesis I|g__Klebsiella.s__Klebsiella_variicola	0	0	1.03026e-05	1.68538e-05
GLUTORN-PWY: L-ornithine biosynthesis I|g__Lachnoclostridium.s__Clostridium_asparagiforme	0	0	0	9.89036e-08
GLUTORN-PWY: L-ornithine biosynthesis I|g__Lachnoclostridium.s__Clostridium_bolteae	0	0	9.27753e-08	6.36241e-08
GLUTORN-PWY: L-ornithine biosynthesis I|g__Lachnospira.s__Lachnospira_pectinoschiza	0	0	1.67251e-06	1.02124e-06
GLUTORN-PWY: L-ornithine biosynthesis I|g__Lachnospiraceae_unclassified.s__Eubacterium_rectale	0	0	3.66256e-06	2.07873e-06
GLUTORN-PWY: L-ornithine biosynthesis I|g__Lactobacillus.s__Lactobacillus_fermentum	0	0	0	3.82553e-07
GLUTORN-PWY: L-ornithine biosynthesis I|g__Lactobacillus.s__Lactobacillus_rogosae	0	0	1.58683e-06	1.02614e-06
GLUTORN-PWY: L-ornithine biosynthesis I|g__Megamonas.s__Megamonas_funiformis	0	0	5.98902e-06	5.1624e-06
GLUTORN-PWY: L-ornithine biosynthesis I|g__Parasutterella.s__Parasutterella_excrementihominis	0	0	5.87014e-07	2.60568e-07
GLUTORN-PWY: L-ornithine biosynthesis I|g__Phascolarctobacterium.s__Phascolarctobacterium_faecium	0	0	5.58638e-06	3.62087e-06
GLUTORN-PWY: L-ornithine biosynthesis I|g__Roseburia.s__Roseburia_faecis	0	0	8.0594e-06	4.80024e-06
GLUTORN-PWY: L-ornithine biosynthesis I|g__Roseburia.s__Roseburia_hominis	0	0	0	1.59054e-07
GLUTORN-PWY: L-ornithine biosynthesis I|g__Ruminococcus.s__Ruminococcus_callidus	0	0	3.17858e-06	2.50773e-07
GLUTORN-PWY: L-ornithine biosynthesis I|g__Streptococcus.s__Streptococcus_salivarius	0	0	4.8147e-06	6.55985e-06
GLUTORN-PWY: L-ornithine biosynthesis I|unclassified	0	0	8.56745e-06	0
GLYCOCAT-PWY: glycogen degradation I	0	0	0.000177702	0.00029265
GLYCOCAT-PWY: glycogen degradation I|g__Bifidobacterium.s__Bifidobacterium_longum	0	0	7.26057e-07	4.73281e-07
GLYCOCAT-PWY: glycogen degradation I|g__Klebsiella.s__Klebsiella_pneumoniae	0	0	7.90243e-05	0.000146114
GLYCOCAT-PWY: glycogen degradation I|g__Klebsiella.s__Klebsiella_quasipneumoniae	0	0	1.20516e-05	1.88276e-05
GLYCOCAT-PWY: glycogen degradation I|g__Klebsiella.s__Klebsiella_variicola	0	0	1.13814e-05	2.2506e-05
GLYCOCAT-PWY: glycogen degradation I|unclassified	0	0	6.22649e-06	0
GLYCOGENSYNTH-PWY: glycogen biosynthesis I (from ADP-D-Glucose)	0	0	0.000415498	0.000465464
GLYCOGENSYNTH-PWY: glycogen biosynthesis I (from ADP-D-Glucose)|g__Agathobaculum.s__Agathobaculum_butyriciproducens	0	0	3.05075e-06	1.45807e-06
GLYCOGENSYNTH-PWY: glycogen biosynthesis I (from ADP-D-Glucose)|g__Anaerostipes.s__Anaerostipes_hadrus	0	0	1.47911e-06	1.11432e-06
GLYCOGENSYNTH-PWY: glycogen biosynthesis I (from ADP-D-Glucose)|g__Bacteroides.s__Bacteroides_galacturonicus	0	0	4.08701e-06	2.74979e-06
GLYCOGENSYNTH-PWY: glycogen biosynthesis I (from ADP-D-Glucose)|g__Bifidobacterium.s__Bifidobacterium_longum	0	0	4.3726e-07	3.67621e-07
GLYCOGENSYNTH-PWY: glycogen biosynthesis I (from ADP-D-Glucose)|g__Blautia.s__Blautia_obeum	0	0	1.32736e-05	7.95078e-06
GLYCOGENSYNTH-PWY: glycogen biosynthesis I (from ADP-D-Glucose)|g__Blautia.s__Blautia_wexlerae	0	0	4.19781e-06	3.09531e-06
GLYCOGENSYNTH-PWY: glycogen biosynthesis I (from ADP-D-Glucose)|g__Blautia.s__Ruminococcus_torques	0	0	3.20894e-05	2.01652e-05
GLYCOGENSYNTH-PWY: glycogen biosynthesis I (from ADP-D-Glucose)|g__Collinsella.s__Collinsella_aerofaciens	0	0	1.82347e-06	1.83507e-06
GLYCOGENSYNTH-PWY: glycogen biosynthesis I (from ADP-D-Glucose)|g__Coprococcus.s__Coprococcus_catus	0	0	1.39641e-06	7.47361e-07
GLYCOGENSYNTH-PWY: glycogen biosynthesis I (from ADP-D-Glucose)|g__Cronobacter.s__Cronobacter_sakazakii	0	0	0	7.09329e-07
GLYCOGENSYNTH-PWY: glycogen biosynthesis I (from ADP-D-Glucose)|g__Dorea.s__Dorea_formicigenerans	0	0	6.96576e-06	4.62873e-06
GLYCOGENSYNTH-PWY: glycogen biosynthesis I (from ADP-D-Glucose)|g__Dorea.s__Dorea_longicatena	0	0	7.46049e-06	6.55131e-06
GLYCOGENSYNTH-PWY: glycogen biosynthesis I (from ADP-D-Glucose)|g__Eubacterium.s__Eubacterium_hallii	0	0	2.58063e-06	2.16219e-06
GLYCOGENSYNTH-PWY: glycogen biosynthesis I (from ADP-D-Glucose)|g__Eubacterium.s__Eubacterium_ramulus	0	0	2.61349e-06	1.75477e-06
GLYCOGENSYNTH-PWY: glycogen biosynthesis I (from ADP-D-Glucose)|g__Faecalibacterium.s__Faecalibacterium_prausnitzii	0	0	1.35105e-05	1.48637e-05
GLYCOGENSYNTH-PWY: glycogen biosynthesis I (from ADP-D-Glucose)|g__Flavonifractor.s__Flavonifractor_plautii	0	0	4.35605e-07	2.09137e-07
GLYCOGENSYNTH-PWY: glycogen biosynthesis I (from ADP-D-Glucose)|g__Fusicatenibacter.s__Fusicatenibacter_saccharivorans	0	0	1.88108e-06	1.37889e-06
GLYCOGENSYNTH-PWY: glycogen biosynthesis I (from ADP-D-Glucose)|g__Haemophilus.s__Haemophilus_parahaemolyticus	0	0	0	2.28486e-08
GLYCOGENSYNTH-PWY: glycogen biosynthesis I (from ADP-D-Glucose)|g__Haemophilus.s__Haemophilus_parainfluenzae	0	0	2.619e-06	5.94513e-06
GLYCOGENSYNTH-PWY: glycogen biosynthesis I (from ADP-D-Glucose)|g__Haemophilus.s__Haemophilus_paraphrohaemolyticus	0	0	0	6.85976e-08
GLYCOGENSYNTH-PWY: glycogen biosynthesis I (from ADP-D-Glucose)|g__Klebsiella.s__Klebsiella_pneumoniae	0	0	5.10922e-05	9.24251e-05
GLYCOGENSYNTH-PWY: glycogen biosynthesis I (from ADP-D-Glucose)|g__Klebsiella.s__Klebsiella_quasipneumoniae	0	0	6.95053e-05	0.000128385
GLYCOGENSYNTH-PWY: glycogen biosynthesis I (from ADP-D-Glucose)|g__Klebsiella.s__Klebsiella_variicola	0	0	2.58117e-05	4.67728e-05
GLYCOGENSYNTH-PWY: glycogen biosynthesis I (from ADP-D-Glucose)|g__Lachnospira.s__Lachnospira_pectinoschiza	0	0	3.72329e-06	2.88487e-06
GLYCOGENSYNTH-PWY: glycogen biosynthesis I (from ADP-D-Glucose)|g__Lactobacillus.s__Lactobacillus_rogosae	0	0	2.94279e-06	1.88453e-06
GLYCOGENSYNTH-PWY: glycogen biosynthesis I (from ADP-D-Glucose)|g__Roseburia.s__Roseburia_faecis	0	0	1.00117e-05	5.78709e-06
GLYCOGENSYNTH-PWY: glycogen biosynthesis I (from ADP-D-Glucose)|g__Roseburia.s__Roseburia_hominis	0	0	0	1.38603e-07
GLYCOGENSYNTH-PWY: glycogen biosynthesis I (from ADP-D-Glucose)|g__Roseburia.s__Roseburia_inulinivorans	0	0	0	2.31113e-07
GLYCOGENSYNTH-PWY: glycogen biosynthesis I (from ADP-D-Glucose)|g__Streptococcus.s__Streptococcus_parasanguinis	0	0	0	6.07035e-07
GLYCOGENSYNTH-PWY: glycogen biosynthesis I (from ADP-D-Glucose)|g__Streptococcus.s__Streptococcus_salivarius	0	0	4.38861e-06	7.04842e-06
GLYCOGENSYNTH-PWY: glycogen biosynthesis I (from ADP-D-Glucose)|unclassified	0	0	1.82949e-05	0
GLYCOL-GLYOXDEG-PWY: superpathway of glycol metabolism and degradation	0	0	1.44447e-06	2.75549e-06
GLYCOL-GLYOXDEG-PWY: superpathway of glycol metabolism and degradation|g__Klebsiella.s__Klebsiella_pneumoniae	0	0	9.94254e-07	1.52415e-06
GLYCOLYSIS-E-D: superpathway of glycolysis and the Entner-Doudoroff pathway	0	0	0.000139099	0.00014136
GLYCOLYSIS-E-D: superpathway of glycolysis and the Entner-Doudoroff pathway|g__Cronobacter.s__Cronobacter_sakazakii	0	0	0	5.23588e-07
GLYCOLYSIS-E-D: superpathway of glycolysis and the Entner-Doudoroff pathway|g__Klebsiella.s__Klebsiella_pneumoniae	0	0	6.63996e-06	1.5342e-05
GLYCOLYSIS-E-D: superpathway of glycolysis and the Entner-Doudoroff pathway|g__Klebsiella.s__Klebsiella_variicola	0	0	7.79628e-06	1.37789e-05
GLYCOLYSIS-TCA-GLYOX-BYPASS: superpathway of glycolysis, pyruvate dehydrogenase, TCA, and glyoxylate bypass	0	0	0.000131269	0.000193769
GLYCOLYSIS-TCA-GLYOX-BYPASS: superpathway of glycolysis, pyruvate dehydrogenase, TCA, and glyoxylate bypass|g__Cronobacter.s__Cronobacter_sakazakii	0	0	0	2.7879e-07
GLYCOLYSIS-TCA-GLYOX-BYPASS: superpathway of glycolysis, pyruvate dehydrogenase, TCA, and glyoxylate bypass|g__Klebsiella.s__Klebsiella_pneumoniae	0	0	2.33737e-05	4.1258e-05
GLYCOLYSIS-TCA-GLYOX-BYPASS: superpathway of glycolysis, pyruvate dehydrogenase, TCA, and glyoxylate bypass|g__Klebsiella.s__Klebsiella_variicola	0	0	6.62136e-06	1.12377e-05
GLYCOLYSIS: glycolysis I (from glucose 6-phosphate)	0	0	0.000283159	0.000339173
GLYCOLYSIS: glycolysis I (from glucose 6-phosphate)|g__Bacteroides.s__Bacteroides_cellulosilyticus	0	0	1.04416e-06	1.12883e-06
GLYCOLYSIS: glycolysis I (from glucose 6-phosphate)|g__Bacteroides.s__Bacteroides_fragilis	0	0	1.01975e-05	7.78616e-06
GLYCOLYSIS: glycolysis I (from glucose 6-phosphate)|g__Cronobacter.s__Cronobacter_sakazakii	0	0	2.44719e-07	5.55905e-07
GLYCOLYSIS: glycolysis I (from glucose 6-phosphate)|g__Haemophilus.s__Haemophilus_parahaemolyticus	0	0	0	6.31449e-08
GLYCOLYSIS: glycolysis I (from glucose 6-phosphate)|g__Haemophilus.s__Haemophilus_parainfluenzae	0	0	3.72957e-06	7.18801e-06
GLYCOLYSIS: glycolysis I (from glucose 6-phosphate)|g__Haemophilus.s__Haemophilus_sputorum	0	0	0	2.28237e-07
GLYCOLYSIS: glycolysis I (from glucose 6-phosphate)|g__Klebsiella.s__Klebsiella_pneumoniae	0	0	3.00367e-05	5.60902e-05
GLYCOLYSIS: glycolysis I (from glucose 6-phosphate)|g__Klebsiella.s__Klebsiella_quasipneumoniae	0	0	3.41658e-05	6.53339e-05
GLYCOLYSIS: glycolysis I (from glucose 6-phosphate)|g__Klebsiella.s__Klebsiella_variicola	0	0	1.0774e-05	1.95063e-05
GLYCOLYSIS: glycolysis I (from glucose 6-phosphate)|g__Streptococcus.s__Streptococcus_salivarius	0	0	0	5.91735e-08
GLYCOLYSIS: glycolysis I (from glucose 6-phosphate)|unclassified	0	0	4.91592e-06	0
GLYOXYLATE-BYPASS: glyoxylate cycle	0	0	5.25189e-05	8.40194e-05
GLYOXYLATE-BYPASS: glyoxylate cycle|g__Cronobacter.s__Cronobacter_sakazakii	0	0	0	9.95765e-08
GLYOXYLATE-BYPASS: glyoxylate cycle|g__Klebsiella.s__Klebsiella_pneumoniae	0	0	2.1529e-05	3.34878e-05
GLYOXYLATE-BYPASS: glyoxylate cycle|g__Klebsiella.s__Klebsiella_quasipneumoniae	0	0	2.91952e-05	5.01687e-05
GLYOXYLATE-BYPASS: glyoxylate cycle|g__Klebsiella.s__Klebsiella_variicola	0	0	2.91417e-06	4.77733e-06
GLYOXYLATE-BYPASS: glyoxylate cycle|unclassified	0	0	4.96739e-07	0
GOLPDLCAT-PWY: superpathway of glycerol degradation to 1,3-propanediol	0	0	7.61219e-05	0.000100744
GOLPDLCAT-PWY: superpathway of glycerol degradation to 1,3-propanediol|g__Anaerostipes.s__Anaerostipes_hadrus	0	0	7.45555e-07	5.97735e-07
GOLPDLCAT-PWY: superpathway of glycerol degradation to 1,3-propanediol|g__Blautia.s__Ruminococcus_torques	0	0	2.01911e-05	1.28975e-05
GOLPDLCAT-PWY: superpathway of glycerol degradation to 1,3-propanediol|g__Eubacterium.s__Eubacterium_hallii	0	0	5.32564e-07	3.60949e-07
GOLPDLCAT-PWY: superpathway of glycerol degradation to 1,3-propanediol|g__Flavonifractor.s__Flavonifractor_plautii	0	0	4.35507e-07	4.04916e-07
GOLPDLCAT-PWY: superpathway of glycerol degradation to 1,3-propanediol|g__Klebsiella.s__Klebsiella_pneumoniae	0	0	2.62966e-05	4.85201e-05
GOLPDLCAT-PWY: superpathway of glycerol degradation to 1,3-propanediol|g__Klebsiella.s__Klebsiella_quasipneumoniae	0	0	3.2007e-08	1.29795e-07
GOLPDLCAT-PWY: superpathway of glycerol degradation to 1,3-propanediol|g__Klebsiella.s__Klebsiella_variicola	0	0	9.21182e-06	1.35007e-05
GOLPDLCAT-PWY: superpathway of glycerol degradation to 1,3-propanediol|unclassified	0	0	2.34667e-07	0
HCAMHPDEG-PWY: 3-phenylpropanoate and 3-(3-hydroxyphenyl)propanoate degradation to 2-hydroxypentadienoate	0	0	5.51763e-05	0.000120892
HCAMHPDEG-PWY: 3-phenylpropanoate and 3-(3-hydroxyphenyl)propanoate degradation to 2-hydroxypentadienoate|g__Klebsiella.s__Klebsiella_pneumoniae	0	0	7.74403e-06	2.09602e-05
HCAMHPDEG-PWY: 3-phenylpropanoate and 3-(3-hydroxyphenyl)propanoate degradation to 2-hydroxypentadienoate|g__Klebsiella.s__Klebsiella_variicola	0	0	3.82271e-06	9.31736e-06
HEME-BIOSYNTHESIS-II: heme b biosynthesis I (aerobic)	0	0	4.85866e-05	7.29723e-05
HEME-BIOSYNTHESIS-II: heme b biosynthesis I (aerobic)|g__Cronobacter.s__Cronobacter_sakazakii	0	0	0	4.58476e-07
HEME-BIOSYNTHESIS-II: heme b biosynthesis I (aerobic)|g__Haemophilus.s__Haemophilus_paraphrohaemolyticus	0	0	0	1.18357e-07
HEME-BIOSYNTHESIS-II: heme b biosynthesis I (aerobic)|g__Klebsiella.s__Klebsiella_pneumoniae	0	0	5.50572e-06	1.27645e-05
HEME-BIOSYNTHESIS-II: heme b biosynthesis I (aerobic)|g__Klebsiella.s__Klebsiella_quasipneumoniae	0	0	2.29603e-05	3.60577e-05
HEME-BIOSYNTHESIS-II: heme b biosynthesis I (aerobic)|g__Klebsiella.s__Klebsiella_variicola	0	0	3.48019e-06	5.72262e-06
HEME-BIOSYNTHESIS-II: heme b biosynthesis I (aerobic)|g__Veillonella.s__Veillonella_atypica	0	0	7.70235e-07	8.85034e-07
HEME-BIOSYNTHESIS-II: heme b biosynthesis I (aerobic)|g__Veillonella.s__Veillonella_dispar	0	0	0	1.89249e-07
HEME-BIOSYNTHESIS-II: heme b biosynthesis I (aerobic)|g__Veillonella.s__Veillonella_parvula	0	0	0	1.94395e-07
HEMESYN2-PWY: heme b biosynthesis II (oxygen-independent)	0	0	5.0452e-05	7.14153e-05
HEMESYN2-PWY: heme b biosynthesis II (oxygen-independent)|g__Cronobacter.s__Cronobacter_sakazakii	0	0	0	2.1817e-07
HEMESYN2-PWY: heme b biosynthesis II (oxygen-independent)|g__Haemophilus.s__Haemophilus_parahaemolyticus	0	0	0	4.59371e-08
HEMESYN2-PWY: heme b biosynthesis II (oxygen-independent)|g__Haemophilus.s__Haemophilus_parainfluenzae	0	0	2.22675e-06	6.12673e-06
HEMESYN2-PWY: heme b biosynthesis II (oxygen-independent)|g__Haemophilus.s__Haemophilus_paraphrohaemolyticus	0	0	0	5.49864e-08
HEMESYN2-PWY: heme b biosynthesis II (oxygen-independent)|g__Haemophilus.s__Haemophilus_sputorum	0	0	0	3.23976e-07
HEMESYN2-PWY: heme b biosynthesis II (oxygen-independent)|g__Klebsiella.s__Klebsiella_pneumoniae	0	0	7.45536e-06	1.30345e-05
HEMESYN2-PWY: heme b biosynthesis II (oxygen-independent)|g__Klebsiella.s__Klebsiella_quasipneumoniae	0	0	2.3111e-05	3.91493e-05
HEMESYN2-PWY: heme b biosynthesis II (oxygen-independent)|g__Klebsiella.s__Klebsiella_variicola	0	0	3.68685e-06	5.77418e-06
HEMESYN2-PWY: heme b biosynthesis II (oxygen-independent)|g__Parasutterella.s__Parasutterella_excrementihominis	0	0	2.84386e-07	3.77084e-07
HEMESYN2-PWY: heme b biosynthesis II (oxygen-independent)|g__Turicimonas.s__Turicimonas_muris	0	0	0	8.54079e-08
HEMESYN2-PWY: heme b biosynthesis II (oxygen-independent)|g__Veillonella.s__Veillonella_atypica	0	0	8.27643e-07	9.17224e-07
HEMESYN2-PWY: heme b biosynthesis II (oxygen-independent)|g__Veillonella.s__Veillonella_dispar	0	0	0	1.50439e-07
HEMESYN2-PWY: heme b biosynthesis II (oxygen-independent)|g__Veillonella.s__Veillonella_infantium	0	0	1.83229e-07	2.78021e-07
HEMESYN2-PWY: heme b biosynthesis II (oxygen-independent)|g__Veillonella.s__Veillonella_parvula	0	0	0	1.97111e-07
HEMESYN2-PWY: heme b biosynthesis II (oxygen-independent)|unclassified	0	0	4.66381e-07	0
HEXITOLDEGSUPER-PWY: superpathway of hexitol degradation (bacteria)	0	0	0.000189343	0.000241488
HEXITOLDEGSUPER-PWY: superpathway of hexitol degradation (bacteria)|g__Klebsiella.s__Klebsiella_pneumoniae	0	0	1.60803e-05	2.91908e-05
HEXITOLDEGSUPER-PWY: superpathway of hexitol degradation (bacteria)|g__Klebsiella.s__Klebsiella_quasipneumoniae	0	0	3.36352e-05	6.42258e-05
HEXITOLDEGSUPER-PWY: superpathway of hexitol degradation (bacteria)|g__Klebsiella.s__Klebsiella_variicola	0	0	8.0454e-06	1.41623e-05
HISDEG-PWY: L-histidine degradation I	0	0	0.000181509	0.000252557
HISDEG-PWY: L-histidine degradation I|g__Acidaminococcus.s__Acidaminococcus_intestini	0	0	5.00937e-06	3.72893e-06
HISDEG-PWY: L-histidine degradation I|g__Alistipes.s__Alistipes_finegoldii	0	0	0	5.51198e-07
HISDEG-PWY: L-histidine degradation I|g__Alistipes.s__Alistipes_putredinis	0	0	8.52184e-06	2.93436e-06
HISDEG-PWY: L-histidine degradation I|g__Alistipes.s__Alistipes_shahii	0	0	9.58167e-06	6.41766e-06
HISDEG-PWY: L-histidine degradation I|g__Bacteroides.s__Bacteroides_cellulosilyticus	0	0	4.96025e-07	3.34291e-07
HISDEG-PWY: L-histidine degradation I|g__Bacteroides.s__Bacteroides_dorei	0	0	5.79395e-06	5.1486e-06
HISDEG-PWY: L-histidine degradation I|g__Bacteroides.s__Bacteroides_fragilis	0	0	0	6.48748e-08
HISDEG-PWY: L-histidine degradation I|g__Bacteroides.s__Bacteroides_stercoris	0	0	3.12559e-07	1.45128e-06
HISDEG-PWY: L-histidine degradation I|g__Bacteroides.s__Bacteroides_thetaiotaomicron	0	0	3.10495e-06	2.54639e-06
HISDEG-PWY: L-histidine degradation I|g__Bacteroides.s__Bacteroides_uniformis	0	0	2.57629e-06	2.32806e-06
HISDEG-PWY: L-histidine degradation I|g__Bacteroides.s__Bacteroides_vulgatus	0	0	1.14423e-05	1.32382e-05
HISDEG-PWY: L-histidine degradation I|g__Bacteroides.s__Bacteroides_xylanisolvens	0	0	7.73294e-08	3.3593e-08
HISDEG-PWY: L-histidine degradation I|g__Klebsiella.s__Klebsiella_pneumoniae	0	0	4.28678e-05	8.41375e-05
HISDEG-PWY: L-histidine degradation I|g__Klebsiella.s__Klebsiella_quasipneumoniae	0	0	3.5477e-05	7.18335e-05
HISDEG-PWY: L-histidine degradation I|g__Klebsiella.s__Klebsiella_variicola	0	0	2.00582e-05	3.41161e-05
HISDEG-PWY: L-histidine degradation I|g__Odoribacter.s__Odoribacter_splanchnicus	0	0	1.29144e-06	1.29627e-06
HISDEG-PWY: L-histidine degradation I|g__Parabacteroides.s__Parabacteroides_distasonis	0	0	4.57333e-06	2.31372e-06
HISDEG-PWY: L-histidine degradation I|g__Parabacteroides.s__Parabacteroides_merdae	0	0	4.67343e-06	4.5103e-06
HISDEG-PWY: L-histidine degradation I|g__Streptococcus.s__Streptococcus_parasanguinis	0	0	9.9629e-07	1.38614e-06
HISDEG-PWY: L-histidine degradation I|g__Streptococcus.s__Streptococcus_salivarius	0	0	0	6.68929e-08
HISDEG-PWY: L-histidine degradation I|unclassified	0	0	8.3001e-07	0
HISTSYN-PWY: L-histidine biosynthesis	0	0	0.00030165	0.000263499
HISTSYN-PWY: L-histidine biosynthesis|g__Agathobaculum.s__Agathobaculum_butyriciproducens	0	0	1.45361e-06	1.02468e-06
HISTSYN-PWY: L-histidine biosynthesis|g__Alistipes.s__Alistipes_finegoldii	0	0	1.98236e-06	1.2135e-06
HISTSYN-PWY: L-histidine biosynthesis|g__Alistipes.s__Alistipes_shahii	0	0	9.85282e-06	8.67162e-06
HISTSYN-PWY: L-histidine biosynthesis|g__Bacteroides.s__Bacteroides_cellulosilyticus	0	0	1.21072e-05	9.13636e-06
HISTSYN-PWY: L-histidine biosynthesis|g__Bacteroides.s__Bacteroides_dorei	0	0	6.1105e-06	5.32094e-06
HISTSYN-PWY: L-histidine biosynthesis|g__Bacteroides.s__Bacteroides_finegoldii	0	0	5.14084e-07	5.10927e-07
HISTSYN-PWY: L-histidine biosynthesis|g__Bacteroides.s__Bacteroides_fragilis	0	0	9.12211e-06	6.73236e-06
HISTSYN-PWY: L-histidine biosynthesis|g__Bacteroides.s__Bacteroides_stercoris	0	0	6.09995e-07	1.53861e-06
HISTSYN-PWY: L-histidine biosynthesis|g__Bacteroides.s__Bacteroides_thetaiotaomicron	0	0	3.65405e-06	2.75184e-06
HISTSYN-PWY: L-histidine biosynthesis|g__Bacteroides.s__Bacteroides_uniformis	0	0	3.57757e-06	2.4724e-06
HISTSYN-PWY: L-histidine biosynthesis|g__Bacteroides.s__Bacteroides_vulgatus	0	0	1.21765e-05	1.3466e-05
HISTSYN-PWY: L-histidine biosynthesis|g__Bacteroides.s__Bacteroides_xylanisolvens	0	0	1.44429e-06	1.42795e-06
HISTSYN-PWY: L-histidine biosynthesis|g__Bifidobacterium.s__Bifidobacterium_longum	0	0	3.59498e-07	5.20295e-07
HISTSYN-PWY: L-histidine biosynthesis|g__Blautia.s__Blautia_obeum	0	0	7.41621e-06	4.89552e-06
HISTSYN-PWY: L-histidine biosynthesis|g__Blautia.s__Ruminococcus_torques	0	0	4.15522e-05	2.4831e-05
HISTSYN-PWY: L-histidine biosynthesis|g__Clostridium.s__Clostridium_bolteae_CAG_59	0	0	0	8.03911e-08
HISTSYN-PWY: L-histidine biosynthesis|g__Collinsella.s__Collinsella_aerofaciens	0	0	3.02207e-06	2.35442e-06
HISTSYN-PWY: L-histidine biosynthesis|g__Coprococcus.s__Coprococcus_catus	0	0	1.60193e-06	7.48685e-07
HISTSYN-PWY: L-histidine biosynthesis|g__Cronobacter.s__Cronobacter_sakazakii	0	0	0	6.78274e-07
HISTSYN-PWY: L-histidine biosynthesis|g__Dorea.s__Dorea_formicigenerans	0	0	4.58859e-06	3.39322e-06
HISTSYN-PWY: L-histidine biosynthesis|g__Dorea.s__Dorea_longicatena	0	0	0	9.30089e-08
HISTSYN-PWY: L-histidine biosynthesis|g__Eubacterium.s__Eubacterium_sp_CAG_251	0	0	1.77258e-06	1.37523e-06
HISTSYN-PWY: L-histidine biosynthesis|g__Eubacterium.s__Eubacterium_sp_CAG_274	0	0	9.69374e-07	1.04352e-06
HISTSYN-PWY: L-histidine biosynthesis|g__Faecalibacterium.s__Faecalibacterium_prausnitzii	0	0	1.34979e-05	1.26323e-05
HISTSYN-PWY: L-histidine biosynthesis|g__Flavonifractor.s__Flavonifractor_plautii	0	0	5.78877e-07	1.68866e-07
HISTSYN-PWY: L-histidine biosynthesis|g__Haemophilus.s__Haemophilus_parahaemolyticus	0	0	0	1.05301e-07
HISTSYN-PWY: L-histidine biosynthesis|g__Haemophilus.s__Haemophilus_parainfluenzae	0	0	0	6.0184e-07
HISTSYN-PWY: L-histidine biosynthesis|g__Haemophilus.s__Haemophilus_sputorum	0	0	0	3.47899e-07
HISTSYN-PWY: L-histidine biosynthesis|g__Klebsiella.s__Klebsiella_pneumoniae	0	0	5.46328e-06	1.47598e-05
HISTSYN-PWY: L-histidine biosynthesis|g__Klebsiella.s__Klebsiella_quasipneumoniae	0	0	2.87056e-05	5.40184e-05
HISTSYN-PWY: L-histidine biosynthesis|g__Klebsiella.s__Klebsiella_variicola	0	0	5.91249e-06	1.07713e-05
HISTSYN-PWY: L-histidine biosynthesis|g__Lachnoclostridium.s__Clostridium_asparagiforme	0	0	0	7.39336e-08
HISTSYN-PWY: L-histidine biosynthesis|g__Lachnoclostridium.s__Clostridium_bolteae	0	0	0	5.27897e-08
HISTSYN-PWY: L-histidine biosynthesis|g__Lawsonibacter.s__Lawsonibacter_asaccharolyticus	0	0	0	9.7136e-08
HISTSYN-PWY: L-histidine biosynthesis|g__Megamonas.s__Megamonas_funiformis	0	0	4.97068e-07	4.25428e-07
HISTSYN-PWY: L-histidine biosynthesis|g__Megasphaera.s__Megasphaera_sp_DISK_18	0	0	3.01149e-06	2.43471e-06
HISTSYN-PWY: L-histidine biosynthesis|g__Odoribacter.s__Odoribacter_splanchnicus	0	0	1.52178e-06	1.58045e-06
HISTSYN-PWY: L-histidine biosynthesis|g__Parabacteroides.s__Parabacteroides_distasonis	0	0	4.51361e-06	2.28019e-06
HISTSYN-PWY: L-histidine biosynthesis|g__Parabacteroides.s__Parabacteroides_merdae	0	0	5.7444e-06	4.38466e-06
HISTSYN-PWY: L-histidine biosynthesis|g__Parasutterella.s__Parasutterella_excrementihominis	0	0	6.15559e-07	3.99269e-07
HISTSYN-PWY: L-histidine biosynthesis|g__Roseburia.s__Roseburia_inulinivorans	0	0	0	2.64256e-07
HISTSYN-PWY: L-histidine biosynthesis|g__Streptococcus.s__Streptococcus_salivarius	0	0	4.2678e-06	5.65812e-06
HISTSYN-PWY: L-histidine biosynthesis|g__Veillonella.s__Veillonella_atypica	0	0	8.75209e-07	1.05364e-06
HISTSYN-PWY: L-histidine biosynthesis|g__Veillonella.s__Veillonella_parvula	0	0	0	4.01028e-07
HISTSYN-PWY: L-histidine biosynthesis|unclassified	0	0	1.52132e-05	0
HOMOSER-METSYN-PWY: L-methionine biosynthesis I	0	0	0.000156134	0.000233115
HOMOSER-METSYN-PWY: L-methionine biosynthesis I|g__Anaerostipes.s__Anaerostipes_hadrus	0	0	1.20882e-06	5.13954e-07
HOMOSER-METSYN-PWY: L-methionine biosynthesis I|g__Blautia.s__Ruminococcus_torques	0	0	1.24444e-05	6.2438e-06
HOMOSER-METSYN-PWY: L-methionine biosynthesis I|g__Cronobacter.s__Cronobacter_sakazakii	0	0	8.29235e-08	5.85759e-07
HOMOSER-METSYN-PWY: L-methionine biosynthesis I|g__Haemophilus.s__Haemophilus_parainfluenzae	0	0	2.34946e-06	4.60494e-06
HOMOSER-METSYN-PWY: L-methionine biosynthesis I|g__Klebsiella.s__Klebsiella_pneumoniae	0	0	3.37469e-05	6.267e-05
HOMOSER-METSYN-PWY: L-methionine biosynthesis I|g__Klebsiella.s__Klebsiella_quasipneumoniae	0	0	3.0386e-05	4.89147e-05
HOMOSER-METSYN-PWY: L-methionine biosynthesis I|g__Klebsiella.s__Klebsiella_variicola	0	0	8.04306e-06	1.36352e-05
HOMOSER-METSYN-PWY: L-methionine biosynthesis I|g__Lachnoclostridium.s__Clostridium_citroniae	0	0	0	6.25238e-08
HOMOSER-METSYN-PWY: L-methionine biosynthesis I|g__Streptococcus.s__Streptococcus_mitis	0	0	0	2.43631e-07
HOMOSER-METSYN-PWY: L-methionine biosynthesis I|unclassified	0	0	6.22619e-07	0
HSERMETANA-PWY: L-methionine biosynthesis III	0	0	0.000293926	0.000206467
HSERMETANA-PWY: L-methionine biosynthesis III|g__Actinomyces.s__Actinomyces_sp_ICM47	0	0	0	4.41787e-07
HSERMETANA-PWY: L-methionine biosynthesis III|g__Akkermansia.s__Akkermansia_muciniphila	0	0	1.56483e-06	1.38454e-06
HSERMETANA-PWY: L-methionine biosynthesis III|g__Anaerostipes.s__Anaerostipes_hadrus	0	0	9.13062e-07	6.20304e-07
HSERMETANA-PWY: L-methionine biosynthesis III|g__Bacteroides.s__Bacteroides_cellulosilyticus	0	0	1.17155e-05	8.58927e-06
HSERMETANA-PWY: L-methionine biosynthesis III|g__Bacteroides.s__Bacteroides_fragilis	0	0	1.63475e-05	1.12945e-05
HSERMETANA-PWY: L-methionine biosynthesis III|g__Bacteroides.s__Bacteroides_xylanisolvens	0	0	5.8551e-07	7.34503e-07
HSERMETANA-PWY: L-methionine biosynthesis III|g__Bifidobacterium.s__Bifidobacterium_longum	0	0	0	5.42733e-07
HSERMETANA-PWY: L-methionine biosynthesis III|g__Blautia.s__Blautia_obeum	0	0	7.18794e-06	4.83998e-06
HSERMETANA-PWY: L-methionine biosynthesis III|g__Blautia.s__Blautia_wexlerae	0	0	6.2409e-06	4.323e-06
HSERMETANA-PWY: L-methionine biosynthesis III|g__Blautia.s__Ruminococcus_torques	0	0	4.38399e-05	2.69644e-05
HSERMETANA-PWY: L-methionine biosynthesis III|g__Coprococcus.s__Coprococcus_catus	0	0	1.67048e-06	6.48431e-07
HSERMETANA-PWY: L-methionine biosynthesis III|g__Dorea.s__Dorea_longicatena	0	0	6.22538e-06	5.69117e-06
HSERMETANA-PWY: L-methionine biosynthesis III|g__Flavonifractor.s__Flavonifractor_plautii	0	0	7.24395e-07	3.17604e-07
HSERMETANA-PWY: L-methionine biosynthesis III|g__Fusicatenibacter.s__Fusicatenibacter_saccharivorans	0	0	8.3816e-07	6.59893e-07
HSERMETANA-PWY: L-methionine biosynthesis III|g__Haemophilus.s__Haemophilus_parahaemolyticus	0	0	0	1.44619e-08
HSERMETANA-PWY: L-methionine biosynthesis III|g__Haemophilus.s__Haemophilus_parainfluenzae	0	0	1.80355e-06	3.71833e-06
HSERMETANA-PWY: L-methionine biosynthesis III|g__Haemophilus.s__Haemophilus_paraphrohaemolyticus	0	0	0	6.99061e-08
HSERMETANA-PWY: L-methionine biosynthesis III|g__Haemophilus.s__Haemophilus_sputorum	0	0	0	3.94879e-07
HSERMETANA-PWY: L-methionine biosynthesis III|g__Intestinimonas.s__Intestinimonas_butyriciproducens	0	0	0	2.62199e-07
HSERMETANA-PWY: L-methionine biosynthesis III|g__Lachnoclostridium.s__Clostridium_citroniae	0	0	0	4.34003e-08
HSERMETANA-PWY: L-methionine biosynthesis III|g__Lachnospira.s__Lachnospira_pectinoschiza	0	0	3.16565e-06	2.825e-06
HSERMETANA-PWY: L-methionine biosynthesis III|g__Lactobacillus.s__Lactobacillus_rogosae	0	0	2.29082e-06	1.68344e-06
HSERMETANA-PWY: L-methionine biosynthesis III|g__Parabacteroides.s__Parabacteroides_distasonis	0	0	4.14435e-06	2.50859e-06
HSERMETANA-PWY: L-methionine biosynthesis III|g__Roseburia.s__Roseburia_faecis	0	0	1.11994e-05	4.91762e-06
HSERMETANA-PWY: L-methionine biosynthesis III|g__Streptococcus.s__Streptococcus_salivarius	0	0	4.89967e-06	6.69469e-06
HSERMETANA-PWY: L-methionine biosynthesis III|unclassified	0	0	1.03694e-05	0
ILEUSYN-PWY: L-isoleucine biosynthesis I (from threonine)	0	0	0.000403128	0.000371534
ILEUSYN-PWY: L-isoleucine biosynthesis I (from threonine)|g__Actinomyces.s__Actinomyces_sp_ICM47	0	0	0	4.78566e-07
ILEUSYN-PWY: L-isoleucine biosynthesis I (from threonine)|g__Adlercreutzia.s__Adlercreutzia_equolifaciens	0	0	2.00872e-07	2.83095e-07
ILEUSYN-PWY: L-isoleucine biosynthesis I (from threonine)|g__Agathobaculum.s__Agathobaculum_butyriciproducens	0	0	1.93729e-06	1.24944e-06
ILEUSYN-PWY: L-isoleucine biosynthesis I (from threonine)|g__Akkermansia.s__Akkermansia_muciniphila	0	0	4.08079e-06	2.55402e-06
ILEUSYN-PWY: L-isoleucine biosynthesis I (from threonine)|g__Anaerostipes.s__Anaerostipes_hadrus	0	0	1.66215e-06	1.04307e-06
ILEUSYN-PWY: L-isoleucine biosynthesis I (from threonine)|g__Asaccharobacter.s__Asaccharobacter_celatus	0	0	3.09447e-07	1.28528e-07
ILEUSYN-PWY: L-isoleucine biosynthesis I (from threonine)|g__Bacteroides.s__Bacteroides_cellulosilyticus	0	0	3.48721e-07	5.18252e-07
ILEUSYN-PWY: L-isoleucine biosynthesis I (from threonine)|g__Bacteroides.s__Bacteroides_finegoldii	0	0	5.58305e-07	7.0748e-07
ILEUSYN-PWY: L-isoleucine biosynthesis I (from threonine)|g__Bacteroides.s__Bacteroides_fragilis	0	0	1.94464e-05	1.51563e-05
ILEUSYN-PWY: L-isoleucine biosynthesis I (from threonine)|g__Bacteroides.s__Bacteroides_stercoris	0	0	7.29667e-07	1.31839e-06
ILEUSYN-PWY: L-isoleucine biosynthesis I (from threonine)|g__Bacteroides.s__Bacteroides_thetaiotaomicron	0	0	4.11538e-06	3.26602e-06
ILEUSYN-PWY: L-isoleucine biosynthesis I (from threonine)|g__Bacteroides.s__Bacteroides_uniformis	0	0	2.9979e-06	2.2379e-06
ILEUSYN-PWY: L-isoleucine biosynthesis I (from threonine)|g__Bacteroides.s__Bacteroides_xylanisolvens	0	0	1.21121e-06	1.53903e-06
ILEUSYN-PWY: L-isoleucine biosynthesis I (from threonine)|g__Bifidobacterium.s__Bifidobacterium_longum	0	0	6.74344e-07	4.72502e-07
ILEUSYN-PWY: L-isoleucine biosynthesis I (from threonine)|g__Bilophila.s__Bilophila_wadsworthia	0	0	2.32143e-06	1.9028e-06
ILEUSYN-PWY: L-isoleucine biosynthesis I (from threonine)|g__Blautia.s__Blautia_obeum	0	0	1.12727e-05	7.10934e-06
ILEUSYN-PWY: L-isoleucine biosynthesis I (from threonine)|g__Blautia.s__Blautia_wexlerae	0	0	7.40766e-06	4.98514e-06
ILEUSYN-PWY: L-isoleucine biosynthesis I (from threonine)|g__Blautia.s__Ruminococcus_torques	0	0	4.63408e-05	3.09161e-05
ILEUSYN-PWY: L-isoleucine biosynthesis I (from threonine)|g__Cronobacter.s__Cronobacter_sakazakii	0	0	4.73453e-08	1.50225e-07
ILEUSYN-PWY: L-isoleucine biosynthesis I (from threonine)|g__Dorea.s__Dorea_formicigenerans	0	0	5.44456e-06	2.8687e-06
ILEUSYN-PWY: L-isoleucine biosynthesis I (from threonine)|g__Dorea.s__Dorea_longicatena	0	0	5.50096e-06	5.00325e-06
ILEUSYN-PWY: L-isoleucine biosynthesis I (from threonine)|g__Eubacterium.s__Eubacterium_hallii	0	0	1.63262e-06	1.5375e-06
ILEUSYN-PWY: L-isoleucine biosynthesis I (from threonine)|g__Eubacterium.s__Eubacterium_sp_CAG_274	0	0	1.9812e-06	1.31638e-06
ILEUSYN-PWY: L-isoleucine biosynthesis I (from threonine)|g__Flavonifractor.s__Flavonifractor_plautii	0	0	1.24697e-06	5.21688e-07
ILEUSYN-PWY: L-isoleucine biosynthesis I (from threonine)|g__Gemmiger.s__Gemmiger_formicilis	0	0	4.35022e-06	3.04099e-06
ILEUSYN-PWY: L-isoleucine biosynthesis I (from threonine)|g__Haemophilus.s__Haemophilus_parahaemolyticus	0	0	2.40225e-07	7.68716e-08
ILEUSYN-PWY: L-isoleucine biosynthesis I (from threonine)|g__Haemophilus.s__Haemophilus_parainfluenzae	0	0	1.96734e-06	4.57938e-06
ILEUSYN-PWY: L-isoleucine biosynthesis I (from threonine)|g__Haemophilus.s__Haemophilus_paraphrohaemolyticus	0	0	9.182e-08	9.39651e-08
ILEUSYN-PWY: L-isoleucine biosynthesis I (from threonine)|g__Haemophilus.s__Haemophilus_sputorum	0	0	2.29722e-06	5.42579e-06
ILEUSYN-PWY: L-isoleucine biosynthesis I (from threonine)|g__Intestinimonas.s__Intestinimonas_butyriciproducens	0	0	0	2.30722e-07
ILEUSYN-PWY: L-isoleucine biosynthesis I (from threonine)|g__Klebsiella.s__Klebsiella_pneumoniae	0	0	1.34777e-05	2.91436e-05
ILEUSYN-PWY: L-isoleucine biosynthesis I (from threonine)|g__Klebsiella.s__Klebsiella_quasipneumoniae	0	0	4.14187e-05	5.99029e-05
ILEUSYN-PWY: L-isoleucine biosynthesis I (from threonine)|g__Klebsiella.s__Klebsiella_variicola	0	0	6.74829e-06	8.09627e-06
ILEUSYN-PWY: L-isoleucine biosynthesis I (from threonine)|g__Lachnoclostridium.s__Clostridium_asparagiforme	0	0	0	1.65428e-07
ILEUSYN-PWY: L-isoleucine biosynthesis I (from threonine)|g__Lachnoclostridium.s__Clostridium_bolteae	0	0	8.81887e-08	1.17312e-07
ILEUSYN-PWY: L-isoleucine biosynthesis I (from threonine)|g__Lachnoclostridium.s__Clostridium_citroniae	0	0	0	8.63547e-08
ILEUSYN-PWY: L-isoleucine biosynthesis I (from threonine)|g__Lachnospiraceae_unclassified.s__Eubacterium_rectale	0	0	4.65335e-06	2.68192e-06
ILEUSYN-PWY: L-isoleucine biosynthesis I (from threonine)|g__Monoglobus.s__Monoglobus_pectinilyticus	0	0	0	1.79315e-07
ILEUSYN-PWY: L-isoleucine biosynthesis I (from threonine)|g__Parabacteroides.s__Parabacteroides_distasonis	0	0	4.98652e-06	2.7607e-06
ILEUSYN-PWY: L-isoleucine biosynthesis I (from threonine)|g__Parabacteroides.s__Parabacteroides_merdae	0	0	4.41175e-06	4.94593e-06
ILEUSYN-PWY: L-isoleucine biosynthesis I (from threonine)|g__Roseburia.s__Roseburia_hominis	0	0	0	1.63654e-07
ILEUSYN-PWY: L-isoleucine biosynthesis I (from threonine)|g__Roseburia.s__Roseburia_inulinivorans	0	0	0	2.96294e-07
ILEUSYN-PWY: L-isoleucine biosynthesis I (from threonine)|g__Ruthenibacterium.s__Ruthenibacterium_lactatiformans	0	0	0	1.82401e-07
ILEUSYN-PWY: L-isoleucine biosynthesis I (from threonine)|g__Streptococcus.s__Streptococcus_mitis	0	0	0	5.11473e-08
ILEUSYN-PWY: L-isoleucine biosynthesis I (from threonine)|g__Streptococcus.s__Streptococcus_parasanguinis	0	0	1.2615e-06	1.4297e-06
ILEUSYN-PWY: L-isoleucine biosynthesis I (from threonine)|g__Streptococcus.s__Streptococcus_salivarius	0	0	8.21774e-06	9.99804e-06
ILEUSYN-PWY: L-isoleucine biosynthesis I (from threonine)|g__Veillonella.s__Veillonella_atypica	0	0	1.20353e-06	9.49685e-07
ILEUSYN-PWY: L-isoleucine biosynthesis I (from threonine)|g__Veillonella.s__Veillonella_dispar	0	0	7.87786e-07	7.38751e-07
ILEUSYN-PWY: L-isoleucine biosynthesis I (from threonine)|g__Veillonella.s__Veillonella_infantium	0	0	5.10345e-07	3.77844e-07
ILEUSYN-PWY: L-isoleucine biosynthesis I (from threonine)|g__Veillonella.s__Veillonella_parvula	0	0	0	4.51911e-07
ILEUSYN-PWY: L-isoleucine biosynthesis I (from threonine)|g__Veillonella.s__Veillonella_sp_T11011_6	0	0	3.37077e-07	6.81497e-07
ILEUSYN-PWY: L-isoleucine biosynthesis I (from threonine)|unclassified	0	0	1.47032e-05	0
KDO-NAGLIPASYN-PWY: superpathway of (Kdo)2-lipid A biosynthesis	0	0	3.42881e-05	3.28984e-05
KETOGLUCONMET-PWY: ketogluconate metabolism	0	0	7.75523e-06	1.14348e-05
KETOGLUCONMET-PWY: ketogluconate metabolism|g__Cronobacter.s__Cronobacter_sakazakii	0	0	0	6.42488e-07
KETOGLUCONMET-PWY: ketogluconate metabolism|g__Klebsiella.s__Klebsiella_pneumoniae	0	0	4.64753e-06	7.13207e-06
KETOGLUCONMET-PWY: ketogluconate metabolism|g__Klebsiella.s__Klebsiella_variicola	0	0	1.31143e-06	1.09841e-06
LACTOSECAT-PWY: lactose and galactose degradation I	0	0	3.96424e-05	2.0524e-05
LACTOSECAT-PWY: lactose and galactose degradation I|g__Anaerostipes.s__Anaerostipes_hadrus	0	0	1.17555e-06	2.51372e-07
LACTOSECAT-PWY: lactose and galactose degradation I|g__Collinsella.s__Collinsella_aerofaciens	0	0	1.04984e-05	7.13124e-06
LACTOSECAT-PWY: lactose and galactose degradation I|g__Streptococcus.s__Streptococcus_mitis	0	0	0	1.611e-07
LACTOSECAT-PWY: lactose and galactose degradation I|g__Streptococcus.s__Streptococcus_parasanguinis	0	0	5.18167e-07	1.51863e-06
LACTOSECAT-PWY: lactose and galactose degradation I|g__Streptococcus.s__Streptococcus_salivarius	0	0	0	1.19237e-07
LACTOSECAT-PWY: lactose and galactose degradation I|unclassified	0	0	6.0457e-06	0
LIPASYN-PWY: phospholipases	0	0	5.99983e-07	0
MET-SAM-PWY: superpathway of S-adenosyl-L-methionine biosynthesis	0	0	0.000241697	0.000314853
MET-SAM-PWY: superpathway of S-adenosyl-L-methionine biosynthesis|g__Anaerostipes.s__Anaerostipes_hadrus	0	0	1.22467e-06	5.51517e-07
MET-SAM-PWY: superpathway of S-adenosyl-L-methionine biosynthesis|g__Blautia.s__Ruminococcus_torques	0	0	1.91747e-05	1.00935e-05
MET-SAM-PWY: superpathway of S-adenosyl-L-methionine biosynthesis|g__Cronobacter.s__Cronobacter_sakazakii	0	0	1.49218e-07	5.66531e-07
MET-SAM-PWY: superpathway of S-adenosyl-L-methionine biosynthesis|g__Haemophilus.s__Haemophilus_parainfluenzae	0	0	2.55395e-06	5.26791e-06
MET-SAM-PWY: superpathway of S-adenosyl-L-methionine biosynthesis|g__Klebsiella.s__Klebsiella_pneumoniae	0	0	2.29818e-05	4.09184e-05
MET-SAM-PWY: superpathway of S-adenosyl-L-methionine biosynthesis|g__Klebsiella.s__Klebsiella_quasipneumoniae	0	0	4.65132e-05	7.84935e-05
MET-SAM-PWY: superpathway of S-adenosyl-L-methionine biosynthesis|g__Klebsiella.s__Klebsiella_variicola	0	0	8.6635e-06	1.44858e-05
MET-SAM-PWY: superpathway of S-adenosyl-L-methionine biosynthesis|g__Streptococcus.s__Streptococcus_mitis	0	0	0	1.47865e-07
MET-SAM-PWY: superpathway of S-adenosyl-L-methionine biosynthesis|unclassified	0	0	1.39333e-06	0
METH-ACETATE-PWY: methanogenesis from acetate	0	0	6.05616e-05	3.81964e-05
METH-ACETATE-PWY: methanogenesis from acetate|g__Blautia.s__Blautia_obeum	0	0	6.85832e-06	4.47932e-06
METH-ACETATE-PWY: methanogenesis from acetate|g__Blautia.s__Blautia_sp_CAG_257	0	0	7.16246e-07	4.93342e-07
METH-ACETATE-PWY: methanogenesis from acetate|g__Blautia.s__Blautia_wexlerae	0	0	4.72741e-06	3.98357e-06
METH-ACETATE-PWY: methanogenesis from acetate|g__Blautia.s__Ruminococcus_torques	0	0	2.02406e-05	1.14267e-05
METH-ACETATE-PWY: methanogenesis from acetate|g__Fusicatenibacter.s__Fusicatenibacter_saccharivorans	0	0	1.62957e-06	1.21762e-06
METH-ACETATE-PWY: methanogenesis from acetate|unclassified	0	0	2.54511e-06	0
METHGLYUT-PWY: superpathway of methylglyoxal degradation	0	0	3.76644e-05	3.65715e-05
METSYN-PWY: superpathway of L-homoserine and L-methionine biosynthesis	0	0	0.000231197	0.000317623
METSYN-PWY: superpathway of L-homoserine and L-methionine biosynthesis|g__Anaerostipes.s__Anaerostipes_hadrus	0	0	1.24134e-06	5.3333e-07
METSYN-PWY: superpathway of L-homoserine and L-methionine biosynthesis|g__Blautia.s__Ruminococcus_torques	0	0	1.76563e-05	9.15097e-06
METSYN-PWY: superpathway of L-homoserine and L-methionine biosynthesis|g__Cronobacter.s__Cronobacter_sakazakii	0	0	1.45959e-07	7.52975e-07
METSYN-PWY: superpathway of L-homoserine and L-methionine biosynthesis|g__Haemophilus.s__Haemophilus_parainfluenzae	0	0	2.98818e-06	6.08536e-06
METSYN-PWY: superpathway of L-homoserine and L-methionine biosynthesis|g__Klebsiella.s__Klebsiella_pneumoniae	0	0	2.96838e-05	5.59288e-05
METSYN-PWY: superpathway of L-homoserine and L-methionine biosynthesis|g__Klebsiella.s__Klebsiella_quasipneumoniae	0	0	4.77416e-05	7.95565e-05
METSYN-PWY: superpathway of L-homoserine and L-methionine biosynthesis|g__Klebsiella.s__Klebsiella_variicola	0	0	1.04911e-05	1.7328e-05
METSYN-PWY: superpathway of L-homoserine and L-methionine biosynthesis|g__Streptococcus.s__Streptococcus_mitis	0	0	0	1.57731e-07
METSYN-PWY: superpathway of L-homoserine and L-methionine biosynthesis|unclassified	0	0	1.215e-06	0
NAD-BIOSYNTHESIS-II: NAD salvage pathway III (to nicotinamide riboside)	0	0	7.94888e-05	0.000114188
NAD-BIOSYNTHESIS-II: NAD salvage pathway III (to nicotinamide riboside)|g__Cronobacter.s__Cronobacter_sakazakii	0	0	1.72647e-07	6.66737e-07
NAD-BIOSYNTHESIS-II: NAD salvage pathway III (to nicotinamide riboside)|g__Haemophilus.s__Haemophilus_parahaemolyticus	0	0	0	2.30351e-08
NAD-BIOSYNTHESIS-II: NAD salvage pathway III (to nicotinamide riboside)|g__Haemophilus.s__Haemophilus_parainfluenzae	0	0	4.64243e-06	7.02063e-06
NAD-BIOSYNTHESIS-II: NAD salvage pathway III (to nicotinamide riboside)|g__Haemophilus.s__Haemophilus_paraphrohaemolyticus	0	0	0	1.0074e-07
NAD-BIOSYNTHESIS-II: NAD salvage pathway III (to nicotinamide riboside)|g__Haemophilus.s__Haemophilus_sputorum	0	0	0	4.13217e-07
NAD-BIOSYNTHESIS-II: NAD salvage pathway III (to nicotinamide riboside)|g__Klebsiella.s__Klebsiella_pneumoniae	0	0	6.14783e-06	9.67728e-06
NAD-BIOSYNTHESIS-II: NAD salvage pathway III (to nicotinamide riboside)|g__Klebsiella.s__Klebsiella_quasipneumoniae	0	0	2.72375e-05	4.69051e-05
NAD-BIOSYNTHESIS-II: NAD salvage pathway III (to nicotinamide riboside)|g__Klebsiella.s__Klebsiella_variicola	0	0	9.75343e-06	1.49861e-05
NAD-BIOSYNTHESIS-II: NAD salvage pathway III (to nicotinamide riboside)|g__Streptococcus.s__Streptococcus_parasanguinis	0	0	9.35717e-07	8.37122e-07
NAD-BIOSYNTHESIS-II: NAD salvage pathway III (to nicotinamide riboside)|g__Streptococcus.s__Streptococcus_salivarius	0	0	1.41698e-06	2.14054e-06
NAGLIPASYN-PWY: lipid IVA biosynthesis (E. coli)	0	0	0.000123392	0.000161166
NAGLIPASYN-PWY: lipid IVA biosynthesis (E. coli)|g__Bacteroides.s__Bacteroides_cellulosilyticus	0	0	0	1.00867e-06
NAGLIPASYN-PWY: lipid IVA biosynthesis (E. coli)|g__Bacteroides.s__Bacteroides_stercoris	0	0	6.43412e-07	1.08467e-06
NAGLIPASYN-PWY: lipid IVA biosynthesis (E. coli)|g__Bacteroides.s__Bacteroides_uniformis	0	0	3.26302e-06	2.44417e-06
NAGLIPASYN-PWY: lipid IVA biosynthesis (E. coli)|g__Cronobacter.s__Cronobacter_sakazakii	0	0	1.78069e-07	2.9381e-07
NAGLIPASYN-PWY: lipid IVA biosynthesis (E. coli)|g__Haemophilus.s__Haemophilus_parahaemolyticus	0	0	0	2.12866e-08
NAGLIPASYN-PWY: lipid IVA biosynthesis (E. coli)|g__Haemophilus.s__Haemophilus_parainfluenzae	0	0	3.26189e-06	6.58519e-06
NAGLIPASYN-PWY: lipid IVA biosynthesis (E. coli)|g__Haemophilus.s__Haemophilus_paraphrohaemolyticus	0	0	0	1.65138e-08
NAGLIPASYN-PWY: lipid IVA biosynthesis (E. coli)|g__Haemophilus.s__Haemophilus_sputorum	0	0	0	2.77058e-07
NAGLIPASYN-PWY: lipid IVA biosynthesis (E. coli)|g__Klebsiella.s__Klebsiella_pneumoniae	0	0	8.02009e-06	1.50598e-05
NAGLIPASYN-PWY: lipid IVA biosynthesis (E. coli)|g__Klebsiella.s__Klebsiella_quasipneumoniae	0	0	2.5809e-05	4.41085e-05
NAGLIPASYN-PWY: lipid IVA biosynthesis (E. coli)|g__Klebsiella.s__Klebsiella_variicola	0	0	2.73386e-06	4.8586e-06
NAGLIPASYN-PWY: lipid IVA biosynthesis (E. coli)|g__Parasutterella.s__Parasutterella_excrementihominis	0	0	0	3.21854e-07
NAGLIPASYN-PWY: lipid IVA biosynthesis (E. coli)|unclassified	0	0	2.12181e-06	0
NONMEVIPP-PWY: methylerythritol phosphate pathway I	0	0	0.000340944	0.000295178
NONMEVIPP-PWY: methylerythritol phosphate pathway I|g__Acidaminococcus.s__Acidaminococcus_intestini	0	0	4.55404e-06	3.27272e-06
NONMEVIPP-PWY: methylerythritol phosphate pathway I|g__Actinomyces.s__Actinomyces_sp_ICM47	0	0	0	2.12749e-07
NONMEVIPP-PWY: methylerythritol phosphate pathway I|g__Agathobaculum.s__Agathobaculum_butyriciproducens	0	0	2.21343e-06	1.27672e-06
NONMEVIPP-PWY: methylerythritol phosphate pathway I|g__Alistipes.s__Alistipes_finegoldii	0	0	1.3113e-06	9.26941e-07
NONMEVIPP-PWY: methylerythritol phosphate pathway I|g__Alistipes.s__Alistipes_putredinis	0	0	1.00378e-05	3.57628e-06
NONMEVIPP-PWY: methylerythritol phosphate pathway I|g__Anaerostipes.s__Anaerostipes_hadrus	0	0	1.2642e-06	5.53195e-07
NONMEVIPP-PWY: methylerythritol phosphate pathway I|g__Asaccharobacter.s__Asaccharobacter_celatus	0	0	3.34871e-07	3.43683e-07
NONMEVIPP-PWY: methylerythritol phosphate pathway I|g__Bacteroides.s__Bacteroides_cellulosilyticus	0	0	9.88773e-06	7.57944e-06
NONMEVIPP-PWY: methylerythritol phosphate pathway I|g__Bacteroides.s__Bacteroides_dorei	0	0	4.38547e-06	4.2614e-06
NONMEVIPP-PWY: methylerythritol phosphate pathway I|g__Bacteroides.s__Bacteroides_finegoldii	0	0	0	5.33452e-07
NONMEVIPP-PWY: methylerythritol phosphate pathway I|g__Bacteroides.s__Bacteroides_fragilis	0	0	1.12122e-05	8.41929e-06
NONMEVIPP-PWY: methylerythritol phosphate pathway I|g__Bacteroides.s__Bacteroides_galacturonicus	0	0	2.60177e-06	2.03882e-06
NONMEVIPP-PWY: methylerythritol phosphate pathway I|g__Bacteroides.s__Bacteroides_stercoris	0	0	5.9705e-07	1.21509e-06
NONMEVIPP-PWY: methylerythritol phosphate pathway I|g__Bacteroides.s__Bacteroides_thetaiotaomicron	0	0	4.05098e-06	3.19181e-06
NONMEVIPP-PWY: methylerythritol phosphate pathway I|g__Bacteroides.s__Bacteroides_uniformis	0	0	3.50801e-06	2.72567e-06
NONMEVIPP-PWY: methylerythritol phosphate pathway I|g__Bacteroides.s__Bacteroides_vulgatus	0	0	1.35289e-05	1.49652e-05
NONMEVIPP-PWY: methylerythritol phosphate pathway I|g__Bacteroides.s__Bacteroides_xylanisolvens	0	0	4.51178e-07	7.27339e-07
NONMEVIPP-PWY: methylerythritol phosphate pathway I|g__Bifidobacterium.s__Bifidobacterium_longum	0	0	0	3.55051e-07
NONMEVIPP-PWY: methylerythritol phosphate pathway I|g__Bilophila.s__Bilophila_wadsworthia	0	0	2.10396e-06	1.61776e-06
NONMEVIPP-PWY: methylerythritol phosphate pathway I|g__Blautia.s__Blautia_obeum	0	0	1.04967e-05	7.45456e-06
NONMEVIPP-PWY: methylerythritol phosphate pathway I|g__Blautia.s__Blautia_wexlerae	0	0	3.9155e-06	3.35234e-06
NONMEVIPP-PWY: methylerythritol phosphate pathway I|g__Blautia.s__Ruminococcus_torques	0	0	4.86624e-05	2.98069e-05
NONMEVIPP-PWY: methylerythritol phosphate pathway I|g__Collinsella.s__Collinsella_aerofaciens	0	0	2.45476e-06	1.89998e-06
NONMEVIPP-PWY: methylerythritol phosphate pathway I|g__Coprococcus.s__Coprococcus_catus	0	0	1.11249e-06	6.86427e-07
NONMEVIPP-PWY: methylerythritol phosphate pathway I|g__Cronobacter.s__Cronobacter_sakazakii	0	0	0	3.56711e-07
NONMEVIPP-PWY: methylerythritol phosphate pathway I|g__Dorea.s__Dorea_formicigenerans	0	0	4.81732e-06	3.67867e-06
NONMEVIPP-PWY: methylerythritol phosphate pathway I|g__Dorea.s__Dorea_longicatena	0	0	4.30368e-06	3.92572e-06
NONMEVIPP-PWY: methylerythritol phosphate pathway I|g__Dorea.s__Dorea_sp_CAG_317	0	0	0	4.03662e-07
NONMEVIPP-PWY: methylerythritol phosphate pathway I|g__Eubacterium.s__Eubacterium_hallii	0	0	1.45652e-06	6.17575e-07
NONMEVIPP-PWY: methylerythritol phosphate pathway I|g__Eubacterium.s__Eubacterium_sp_CAG_251	0	0	2.12125e-06	1.49438e-06
NONMEVIPP-PWY: methylerythritol phosphate pathway I|g__Eubacterium.s__Eubacterium_sp_CAG_274	0	0	1.19939e-06	1.08019e-06
NONMEVIPP-PWY: methylerythritol phosphate pathway I|g__Firmicutes_unclassified.s__Firmicutes_bacterium_CAG_83	0	0	1.01523e-06	1.25032e-06
NONMEVIPP-PWY: methylerythritol phosphate pathway I|g__Flavonifractor.s__Flavonifractor_plautii	0	0	0	2.07758e-07
NONMEVIPP-PWY: methylerythritol phosphate pathway I|g__Fusicatenibacter.s__Fusicatenibacter_saccharivorans	0	0	2.30609e-06	1.46667e-06
NONMEVIPP-PWY: methylerythritol phosphate pathway I|g__Gemmiger.s__Gemmiger_formicilis	0	0	2.50134e-06	1.57072e-06
NONMEVIPP-PWY: methylerythritol phosphate pathway I|g__Haemophilus.s__Haemophilus_parainfluenzae	0	0	3.56562e-06	6.38063e-06
NONMEVIPP-PWY: methylerythritol phosphate pathway I|g__Haemophilus.s__Haemophilus_paraphrohaemolyticus	0	0	0	7.98763e-08
NONMEVIPP-PWY: methylerythritol phosphate pathway I|g__Haemophilus.s__Haemophilus_sputorum	0	0	0	2.75012e-07
NONMEVIPP-PWY: methylerythritol phosphate pathway I|g__Intestinimonas.s__Intestinimonas_butyriciproducens	0	0	0	1.28677e-07
NONMEVIPP-PWY: methylerythritol phosphate pathway I|g__Klebsiella.s__Klebsiella_pneumoniae	0	0	9.21258e-06	1.65729e-05
NONMEVIPP-PWY: methylerythritol phosphate pathway I|g__Klebsiella.s__Klebsiella_quasipneumoniae	0	0	3.45557e-05	6.43074e-05
NONMEVIPP-PWY: methylerythritol phosphate pathway I|g__Klebsiella.s__Klebsiella_variicola	0	0	4.62437e-06	8.75603e-06
NONMEVIPP-PWY: methylerythritol phosphate pathway I|g__Lachnospira.s__Lachnospira_pectinoschiza	0	0	2.4824e-06	2.05146e-06
NONMEVIPP-PWY: methylerythritol phosphate pathway I|g__Lachnospiraceae_unclassified.s__Eubacterium_rectale	0	0	1.86106e-06	1.61092e-06
NONMEVIPP-PWY: methylerythritol phosphate pathway I|g__Lactobacillus.s__Lactobacillus_rogosae	0	0	2.19702e-06	1.77308e-06
NONMEVIPP-PWY: methylerythritol phosphate pathway I|g__Lawsonibacter.s__Lawsonibacter_asaccharolyticus	0	0	0	1.48175e-07
NONMEVIPP-PWY: methylerythritol phosphate pathway I|g__Megamonas.s__Megamonas_funiformis	0	0	7.70365e-07	9.06229e-07
NONMEVIPP-PWY: methylerythritol phosphate pathway I|g__Megamonas.s__Megamonas_hypermegale	0	0	0	3.19393e-08
NONMEVIPP-PWY: methylerythritol phosphate pathway I|g__Odoribacter.s__Odoribacter_splanchnicus	0	0	1.32899e-06	1.3618e-06
NONMEVIPP-PWY: methylerythritol phosphate pathway I|g__Parabacteroides.s__Parabacteroides_distasonis	0	0	4.42355e-06	2.71528e-06
NONMEVIPP-PWY: methylerythritol phosphate pathway I|g__Parabacteroides.s__Parabacteroides_merdae	0	0	4.88144e-06	4.28824e-06
NONMEVIPP-PWY: methylerythritol phosphate pathway I|g__Parasutterella.s__Parasutterella_excrementihominis	0	0	0	2.61336e-07
NONMEVIPP-PWY: methylerythritol phosphate pathway I|g__Phascolarctobacterium.s__Phascolarctobacterium_faecium	0	0	6.29114e-06	3.58605e-06
NONMEVIPP-PWY: methylerythritol phosphate pathway I|g__Roseburia.s__Roseburia_faecis	0	0	1.15142e-05	6.0705e-06
NONMEVIPP-PWY: methylerythritol phosphate pathway I|g__Roseburia.s__Roseburia_hominis	0	0	0	1.54276e-07
NONMEVIPP-PWY: methylerythritol phosphate pathway I|g__Roseburia.s__Roseburia_inulinivorans	0	0	0	2.41572e-07
NONMEVIPP-PWY: methylerythritol phosphate pathway I|g__Ruminococcus.s__Ruminococcus_callidus	0	0	3.51661e-06	2.0144e-07
NONMEVIPP-PWY: methylerythritol phosphate pathway I|g__Ruthenibacterium.s__Ruthenibacterium_lactatiformans	0	0	0	1.20858e-07
NONMEVIPP-PWY: methylerythritol phosphate pathway I|g__Veillonella.s__Veillonella_atypica	0	0	5.45435e-07	8.45836e-07
NONMEVIPP-PWY: methylerythritol phosphate pathway I|g__Veillonella.s__Veillonella_parvula	0	0	0	1.57877e-07
NONMEVIPP-PWY: methylerythritol phosphate pathway I|unclassified	0	0	1.60558e-05	0
NONOXIPENT-PWY: pentose phosphate pathway (non-oxidative branch) I	0	0	0.000405786	0.000478232
NONOXIPENT-PWY: pentose phosphate pathway (non-oxidative branch) I|g__Agathobaculum.s__Agathobaculum_butyriciproducens	0	0	1.67175e-06	8.95429e-07
NONOXIPENT-PWY: pentose phosphate pathway (non-oxidative branch) I|g__Anaerostipes.s__Anaerostipes_hadrus	0	0	1.78815e-06	7.73648e-07
NONOXIPENT-PWY: pentose phosphate pathway (non-oxidative branch) I|g__Bacteroides.s__Bacteroides_cellulosilyticus	0	0	1.72428e-05	1.2476e-05
NONOXIPENT-PWY: pentose phosphate pathway (non-oxidative branch) I|g__Bacteroides.s__Bacteroides_fragilis	0	0	8.69722e-08	1.12039e-07
NONOXIPENT-PWY: pentose phosphate pathway (non-oxidative branch) I|g__Bacteroides.s__Bacteroides_galacturonicus	0	0	2.06185e-06	2.14252e-06
NONOXIPENT-PWY: pentose phosphate pathway (non-oxidative branch) I|g__Bacteroides.s__Bacteroides_xylanisolvens	0	0	7.97298e-07	1.01523e-06
NONOXIPENT-PWY: pentose phosphate pathway (non-oxidative branch) I|g__Blautia.s__Blautia_obeum	0	0	6.20269e-06	4.08218e-06
NONOXIPENT-PWY: pentose phosphate pathway (non-oxidative branch) I|g__Blautia.s__Blautia_sp_CAG_257	0	0	6.59471e-07	3.63399e-07
NONOXIPENT-PWY: pentose phosphate pathway (non-oxidative branch) I|g__Blautia.s__Blautia_wexlerae	0	0	2.73669e-06	2.32333e-06
NONOXIPENT-PWY: pentose phosphate pathway (non-oxidative branch) I|g__Blautia.s__Ruminococcus_torques	0	0	4.42627e-05	2.46565e-05
NONOXIPENT-PWY: pentose phosphate pathway (non-oxidative branch) I|g__Clostridium.s__Clostridium_bolteae_CAG_59	0	0	0	1.65532e-07
NONOXIPENT-PWY: pentose phosphate pathway (non-oxidative branch) I|g__Collinsella.s__Collinsella_aerofaciens	0	0	2.44488e-06	2.03466e-06
NONOXIPENT-PWY: pentose phosphate pathway (non-oxidative branch) I|g__Coprococcus.s__Coprococcus_catus	0	0	8.00969e-07	4.74808e-07
NONOXIPENT-PWY: pentose phosphate pathway (non-oxidative branch) I|g__Cronobacter.s__Cronobacter_sakazakii	0	0	5.24452e-08	1.03517e-06
NONOXIPENT-PWY: pentose phosphate pathway (non-oxidative branch) I|g__Dorea.s__Dorea_longicatena	0	0	0	2.29359e-07
NONOXIPENT-PWY: pentose phosphate pathway (non-oxidative branch) I|g__Eubacterium.s__Eubacterium_hallii	0	0	3.60568e-06	2.98032e-06
NONOXIPENT-PWY: pentose phosphate pathway (non-oxidative branch) I|g__Flavonifractor.s__Flavonifractor_plautii	0	0	0	2.59432e-07
NONOXIPENT-PWY: pentose phosphate pathway (non-oxidative branch) I|g__Fusicatenibacter.s__Fusicatenibacter_saccharivorans	0	0	3.40945e-06	2.22702e-06
NONOXIPENT-PWY: pentose phosphate pathway (non-oxidative branch) I|g__Haemophilus.s__Haemophilus_parahaemolyticus	0	0	2.26697e-07	4.47318e-08
NONOXIPENT-PWY: pentose phosphate pathway (non-oxidative branch) I|g__Haemophilus.s__Haemophilus_parainfluenzae	0	0	4.25861e-06	7.52744e-06
NONOXIPENT-PWY: pentose phosphate pathway (non-oxidative branch) I|g__Haemophilus.s__Haemophilus_paraphrohaemolyticus	0	0	1.46132e-07	9.75793e-08
NONOXIPENT-PWY: pentose phosphate pathway (non-oxidative branch) I|g__Haemophilus.s__Haemophilus_sputorum	0	0	0	2.77581e-07
NONOXIPENT-PWY: pentose phosphate pathway (non-oxidative branch) I|g__Intestinimonas.s__Intestinimonas_butyriciproducens	0	0	0	3.72326e-07
NONOXIPENT-PWY: pentose phosphate pathway (non-oxidative branch) I|g__Klebsiella.s__Klebsiella_pneumoniae	0	0	4.75391e-05	7.8956e-05
NONOXIPENT-PWY: pentose phosphate pathway (non-oxidative branch) I|g__Klebsiella.s__Klebsiella_quasipneumoniae	0	0	7.5146e-05	0.000144289
NONOXIPENT-PWY: pentose phosphate pathway (non-oxidative branch) I|g__Klebsiella.s__Klebsiella_variicola	0	0	1.00549e-05	1.70473e-05
NONOXIPENT-PWY: pentose phosphate pathway (non-oxidative branch) I|g__Lachnoclostridium.s__Clostridium_asparagiforme	0	0	0	7.78067e-08
NONOXIPENT-PWY: pentose phosphate pathway (non-oxidative branch) I|g__Lachnoclostridium.s__Clostridium_bolteae	0	0	0	6.44561e-08
NONOXIPENT-PWY: pentose phosphate pathway (non-oxidative branch) I|g__Lachnoclostridium.s__Clostridium_citroniae	0	0	2.94068e-07	5.41792e-08
NONOXIPENT-PWY: pentose phosphate pathway (non-oxidative branch) I|g__Lachnospira.s__Lachnospira_pectinoschiza	0	0	2.08982e-06	1.58156e-06
NONOXIPENT-PWY: pentose phosphate pathway (non-oxidative branch) I|g__Lachnospiraceae_unclassified.s__Eubacterium_rectale	0	0	4.2766e-06	2.32039e-06
NONOXIPENT-PWY: pentose phosphate pathway (non-oxidative branch) I|g__Lactobacillus.s__Lactobacillus_fermentum	0	0	0	3.43273e-07
NONOXIPENT-PWY: pentose phosphate pathway (non-oxidative branch) I|g__Lactobacillus.s__Lactobacillus_rogosae	0	0	3.21615e-06	3.38077e-06
NONOXIPENT-PWY: pentose phosphate pathway (non-oxidative branch) I|g__Megamonas.s__Megamonas_funiformis	0	0	1.5041e-05	1.10971e-05
NONOXIPENT-PWY: pentose phosphate pathway (non-oxidative branch) I|g__Parabacteroides.s__Parabacteroides_distasonis	0	0	4.15901e-06	3.03418e-06
NONOXIPENT-PWY: pentose phosphate pathway (non-oxidative branch) I|g__Roseburia.s__Roseburia_faecis	0	0	9.02307e-06	6.67103e-06
NONOXIPENT-PWY: pentose phosphate pathway (non-oxidative branch) I|g__Roseburia.s__Roseburia_hominis	0	0	0	2.16376e-07
NONOXIPENT-PWY: pentose phosphate pathway (non-oxidative branch) I|g__Roseburia.s__Roseburia_inulinivorans	0	0	0	2.82059e-07
NONOXIPENT-PWY: pentose phosphate pathway (non-oxidative branch) I|g__Streptococcus.s__Streptococcus_mitis	0	0	0	1.31016e-07
NONOXIPENT-PWY: pentose phosphate pathway (non-oxidative branch) I|g__Streptococcus.s__Streptococcus_salivarius	0	0	4.60826e-06	6.67505e-06
NONOXIPENT-PWY: pentose phosphate pathway (non-oxidative branch) I|g__Turicimonas.s__Turicimonas_muris	0	0	0	1.27509e-07
NONOXIPENT-PWY: pentose phosphate pathway (non-oxidative branch) I|unclassified	0	0	1.21457e-05	0
OANTIGEN-PWY: O-antigen building blocks biosynthesis (E. coli)	0	0	0.000227554	0.000216431
OANTIGEN-PWY: O-antigen building blocks biosynthesis (E. coli)|g__Acidaminococcus.s__Acidaminococcus_intestini	0	0	4.26953e-06	3.24545e-06
OANTIGEN-PWY: O-antigen building blocks biosynthesis (E. coli)|g__Collinsella.s__Collinsella_aerofaciens	0	0	3.44096e-06	2.62169e-06
OANTIGEN-PWY: O-antigen building blocks biosynthesis (E. coli)|g__Cronobacter.s__Cronobacter_sakazakii	0	0	0	3.95289e-07
OANTIGEN-PWY: O-antigen building blocks biosynthesis (E. coli)|g__Klebsiella.s__Klebsiella_pneumoniae	0	0	3.79003e-06	4.65733e-06
OANTIGEN-PWY: O-antigen building blocks biosynthesis (E. coli)|g__Klebsiella.s__Klebsiella_quasipneumoniae	0	0	2.73994e-07	4.81598e-07
OANTIGEN-PWY: O-antigen building blocks biosynthesis (E. coli)|g__Klebsiella.s__Klebsiella_variicola	0	0	2.96068e-06	4.45721e-06
OANTIGEN-PWY: O-antigen building blocks biosynthesis (E. coli)|g__Megasphaera.s__Megasphaera_sp_DISK_18	0	0	2.47875e-06	2.45993e-06
OANTIGEN-PWY: O-antigen building blocks biosynthesis (E. coli)|g__Streptococcus.s__Streptococcus_parasanguinis	0	0	5.46513e-07	6.76778e-07
OANTIGEN-PWY: O-antigen building blocks biosynthesis (E. coli)|g__Streptococcus.s__Streptococcus_salivarius	0	0	0	4.65599e-07
OANTIGEN-PWY: O-antigen building blocks biosynthesis (E. coli)|g__Veillonella.s__Veillonella_atypica	0	0	4.41571e-07	4.76837e-07
OANTIGEN-PWY: O-antigen building blocks biosynthesis (E. coli)|unclassified	0	0	1.84545e-05	0
ORNARGDEG-PWY: superpathway of L-arginine and L-ornithine degradation	0	0	8.12176e-05	0.000150622
ORNARGDEG-PWY: superpathway of L-arginine and L-ornithine degradation|g__Cronobacter.s__Cronobacter_sakazakii	0	0	0	2.51283e-07
ORNARGDEG-PWY: superpathway of L-arginine and L-ornithine degradation|g__Klebsiella.s__Klebsiella_pneumoniae	0	0	1.25732e-05	2.77133e-05
ORNARGDEG-PWY: superpathway of L-arginine and L-ornithine degradation|g__Klebsiella.s__Klebsiella_quasipneumoniae	0	0	3.73388e-05	7.5392e-05
ORNARGDEG-PWY: superpathway of L-arginine and L-ornithine degradation|g__Klebsiella.s__Klebsiella_variicola	0	0	3.4121e-06	6.68416e-06
ORNDEG-PWY: superpathway of ornithine degradation	0	0	7.03919e-05	0.000129375
ORNDEG-PWY: superpathway of ornithine degradation|g__Cronobacter.s__Cronobacter_sakazakii	0	0	5.60998e-07	6.63148e-07
ORNDEG-PWY: superpathway of ornithine degradation|g__Klebsiella.s__Klebsiella_pneumoniae	0	0	1.51684e-05	2.88075e-05
ORNDEG-PWY: superpathway of ornithine degradation|g__Klebsiella.s__Klebsiella_quasipneumoniae	0	0	3.96375e-05	7.94622e-05
ORNDEG-PWY: superpathway of ornithine degradation|g__Klebsiella.s__Klebsiella_variicola	0	0	4.44702e-06	8.23874e-06
P105-PWY: TCA cycle IV (2-oxoglutarate decarboxylase)	0	0	9.64769e-05	0.00015003
P105-PWY: TCA cycle IV (2-oxoglutarate decarboxylase)|g__Klebsiella.s__Klebsiella_pneumoniae	0	0	1.90191e-05	3.25666e-05
P108-PWY: pyruvate fermentation to propanoate I	0	0	8.25859e-05	7.8628e-05
P122-PWY: heterolactic fermentation	0	0	2.55349e-05	3.98274e-05
P122-PWY: heterolactic fermentation|g__Cronobacter.s__Cronobacter_sakazakii	0	0	0	4.55124e-07
P122-PWY: heterolactic fermentation|g__Klebsiella.s__Klebsiella_pneumoniae	0	0	3.69816e-06	4.58653e-06
P122-PWY: heterolactic fermentation|g__Klebsiella.s__Klebsiella_variicola	0	0	4.24306e-06	6.04791e-06
P124-PWY: Bifidobacterium shunt	0	0	1.98822e-05	1.37109e-05
P124-PWY: Bifidobacterium shunt|g__Bifidobacterium.s__Bifidobacterium_longum	0	0	3.94391e-07	4.11753e-07
P124-PWY: Bifidobacterium shunt|g__Collinsella.s__Collinsella_aerofaciens	0	0	3.79749e-06	2.29772e-06
P124-PWY: Bifidobacterium shunt|g__Lactobacillus.s__Lactobacillus_fermentum	0	0	0	3.64963e-07
P125-PWY: superpathway of (R,R)-butanediol biosynthesis	0	0	1.09233e-05	1.09319e-05
P125-PWY: superpathway of (R,R)-butanediol biosynthesis|g__Streptococcus.s__Streptococcus_salivarius	0	0	5.1191e-06	6.22688e-06
P161-PWY: acetylene degradation (anaerobic)	0	0	0.000196806	0.000353454
P161-PWY: acetylene degradation (anaerobic)|g__Cronobacter.s__Cronobacter_sakazakii	0	0	1.04139e-07	4.75561e-07
P161-PWY: acetylene degradation (anaerobic)|g__Flavonifractor.s__Flavonifractor_plautii	0	0	5.57849e-07	2.42141e-07
P161-PWY: acetylene degradation (anaerobic)|g__Klebsiella.s__Klebsiella_pneumoniae	0	0	4.06112e-05	8.3989e-05
P161-PWY: acetylene degradation (anaerobic)|g__Klebsiella.s__Klebsiella_quasipneumoniae	0	0	7.02112e-05	0.000125744
P161-PWY: acetylene degradation (anaerobic)|g__Klebsiella.s__Klebsiella_variicola	0	0	5.70511e-06	9.48931e-06
P161-PWY: acetylene degradation (anaerobic)|g__Streptococcus.s__Streptococcus_parasanguinis	0	0	0	2.67062e-07
P163-PWY: L-lysine fermentation to acetate and butanoate	0	0	0	1.33575e-06
P163-PWY: L-lysine fermentation to acetate and butanoate|g__Intestinimonas.s__Intestinimonas_butyriciproducens	0	0	0	2.54622e-07
P164-PWY: purine nucleobases degradation I (anaerobic)	0	0	9.11244e-05	8.93972e-05
P164-PWY: purine nucleobases degradation I (anaerobic)|g__Clostridium.s__Clostridium_bolteae_CAG_59	0	0	2.96706e-07	1.57817e-07
P164-PWY: purine nucleobases degradation I (anaerobic)|g__Dorea.s__Dorea_longicatena	0	0	0	8.72073e-08
P164-PWY: purine nucleobases degradation I (anaerobic)|g__Lachnoclostridium.s__Clostridium_asparagiforme	0	0	0	4.29474e-08
P164-PWY: purine nucleobases degradation I (anaerobic)|g__Lachnoclostridium.s__Clostridium_bolteae	0	0	3.45907e-07	1.05433e-07
P164-PWY: purine nucleobases degradation I (anaerobic)|g__Lachnoclostridium.s__Clostridium_citroniae	0	0	0	1.47151e-07
P185-PWY: formaldehyde assimilation III (dihydroxyacetone cycle)	0	0	9.56426e-05	0.000141628
P185-PWY: formaldehyde assimilation III (dihydroxyacetone cycle)|g__Cronobacter.s__Cronobacter_sakazakii	0	0	0	5.3766e-07
P185-PWY: formaldehyde assimilation III (dihydroxyacetone cycle)|g__Klebsiella.s__Klebsiella_pneumoniae	0	0	1.81527e-05	2.73703e-05
P185-PWY: formaldehyde assimilation III (dihydroxyacetone cycle)|g__Klebsiella.s__Klebsiella_quasipneumoniae	0	0	1.74785e-05	2.98911e-05
P185-PWY: formaldehyde assimilation III (dihydroxyacetone cycle)|g__Klebsiella.s__Klebsiella_variicola	0	0	5.88522e-06	8.91645e-06
P185-PWY: formaldehyde assimilation III (dihydroxyacetone cycle)|unclassified	0	0	1.48166e-06	0
P221-PWY: octane oxidation	0	0	5.54485e-05	0.000101134
P221-PWY: octane oxidation|g__Cronobacter.s__Cronobacter_sakazakii	0	0	0	3.34909e-07
P221-PWY: octane oxidation|g__Klebsiella.s__Klebsiella_pneumoniae	0	0	6.97828e-06	1.50952e-05
P221-PWY: octane oxidation|g__Klebsiella.s__Klebsiella_quasipneumoniae	0	0	1.8303e-05	3.89775e-05
P23-PWY: reductive TCA cycle I	0	0	4.92642e-05	5.52691e-05
P4-PWY: superpathway of L-lysine, L-threonine and L-methionine biosynthesis I	0	0	0.00018018	0.00023797
P4-PWY: superpathway of L-lysine, L-threonine and L-methionine biosynthesis I|g__Cronobacter.s__Cronobacter_sakazakii	0	0	0	5.40928e-07
P4-PWY: superpathway of L-lysine, L-threonine and L-methionine biosynthesis I|g__Klebsiella.s__Klebsiella_pneumoniae	0	0	1.24078e-05	2.21946e-05
P4-PWY: superpathway of L-lysine, L-threonine and L-methionine biosynthesis I|g__Klebsiella.s__Klebsiella_quasipneumoniae	0	0	2.72379e-05	4.91676e-05
P4-PWY: superpathway of L-lysine, L-threonine and L-methionine biosynthesis I|g__Klebsiella.s__Klebsiella_variicola	0	0	6.90584e-06	1.04218e-05
P4-PWY: superpathway of L-lysine, L-threonine and L-methionine biosynthesis I|unclassified	0	0	1.46668e-06	0
P42-PWY: incomplete reductive TCA cycle	0	0	4.85821e-05	4.91375e-05
P441-PWY: superpathway of N-acetylneuraminate degradation	0	0	0.000199283	0.000258084
P441-PWY: superpathway of N-acetylneuraminate degradation|g__Cronobacter.s__Cronobacter_sakazakii	0	0	0	4.67537e-07
P441-PWY: superpathway of N-acetylneuraminate degradation|g__Klebsiella.s__Klebsiella_pneumoniae	0	0	2.45361e-05	4.51624e-05
P441-PWY: superpathway of N-acetylneuraminate degradation|g__Klebsiella.s__Klebsiella_quasipneumoniae	0	0	1.59234e-05	3.03475e-05
P441-PWY: superpathway of N-acetylneuraminate degradation|g__Klebsiella.s__Klebsiella_variicola	0	0	4.44516e-06	9.44893e-06
P441-PWY: superpathway of N-acetylneuraminate degradation|unclassified	0	0	2.37282e-06	0
P461-PWY: hexitol fermentation to lactate, formate, ethanol and acetate	0	0	0.000178768	0.000298047
P461-PWY: hexitol fermentation to lactate, formate, ethanol and acetate|g__Anaerostipes.s__Anaerostipes_hadrus	0	0	1.68608e-06	1.16961e-06
P461-PWY: hexitol fermentation to lactate, formate, ethanol and acetate|g__Cronobacter.s__Cronobacter_sakazakii	0	0	0	3.37128e-07
P461-PWY: hexitol fermentation to lactate, formate, ethanol and acetate|g__Klebsiella.s__Klebsiella_pneumoniae	0	0	3.49063e-05	6.95469e-05
P461-PWY: hexitol fermentation to lactate, formate, ethanol and acetate|g__Klebsiella.s__Klebsiella_quasipneumoniae	0	0	7.57578e-05	0.000148026
P461-PWY: hexitol fermentation to lactate, formate, ethanol and acetate|g__Klebsiella.s__Klebsiella_variicola	0	0	1.00254e-05	2.16042e-05
P621-PWY: nylon-6 oligomer degradation	0	0	5.77585e-06	6.54655e-06
PANTO-PWY: phosphopantothenate biosynthesis I	0	0	0.000289514	0.000250532
PANTO-PWY: phosphopantothenate biosynthesis I|g__Acidaminococcus.s__Acidaminococcus_intestini	0	0	4.17742e-06	3.42833e-06
PANTO-PWY: phosphopantothenate biosynthesis I|g__Actinomyces.s__Actinomyces_sp_ICM47	0	0	0	2.34517e-07
PANTO-PWY: phosphopantothenate biosynthesis I|g__Agathobaculum.s__Agathobaculum_butyriciproducens	0	0	2.47323e-06	1.29813e-06
PANTO-PWY: phosphopantothenate biosynthesis I|g__Akkermansia.s__Akkermansia_muciniphila	0	0	3.30192e-06	2.65594e-06
PANTO-PWY: phosphopantothenate biosynthesis I|g__Alistipes.s__Alistipes_finegoldii	0	0	2.24956e-06	1.35588e-06
PANTO-PWY: phosphopantothenate biosynthesis I|g__Alistipes.s__Alistipes_putredinis	0	0	1.00781e-05	3.73495e-06
PANTO-PWY: phosphopantothenate biosynthesis I|g__Anaerostipes.s__Anaerostipes_hadrus	0	0	1.33065e-06	8.66692e-07
PANTO-PWY: phosphopantothenate biosynthesis I|g__Asaccharobacter.s__Asaccharobacter_celatus	0	0	6.10302e-07	2.47269e-07
PANTO-PWY: phosphopantothenate biosynthesis I|g__Bacteroides.s__Bacteroides_cellulosilyticus	0	0	1.00323e-05	7.74677e-06
PANTO-PWY: phosphopantothenate biosynthesis I|g__Bacteroides.s__Bacteroides_dorei	0	0	5.95755e-06	5.35762e-06
PANTO-PWY: phosphopantothenate biosynthesis I|g__Bacteroides.s__Bacteroides_finegoldii	0	0	3.60433e-07	5.88982e-07
PANTO-PWY: phosphopantothenate biosynthesis I|g__Bacteroides.s__Bacteroides_fragilis	0	0	1.41499e-05	1.13542e-05
PANTO-PWY: phosphopantothenate biosynthesis I|g__Bacteroides.s__Bacteroides_stercoris	0	0	1.177e-06	1.71222e-06
PANTO-PWY: phosphopantothenate biosynthesis I|g__Bacteroides.s__Bacteroides_thetaiotaomicron	0	0	3.12461e-06	2.82326e-06
PANTO-PWY: phosphopantothenate biosynthesis I|g__Bacteroides.s__Bacteroides_uniformis	0	0	3.19805e-06	2.32685e-06
PANTO-PWY: phosphopantothenate biosynthesis I|g__Bacteroides.s__Bacteroides_vulgatus	0	0	1.21465e-05	1.35969e-05
PANTO-PWY: phosphopantothenate biosynthesis I|g__Bacteroides.s__Bacteroides_xylanisolvens	0	0	1.65716e-06	1.6833e-06
PANTO-PWY: phosphopantothenate biosynthesis I|g__Bilophila.s__Bilophila_wadsworthia	0	0	1.7994e-06	1.94989e-06
PANTO-PWY: phosphopantothenate biosynthesis I|g__Blautia.s__Blautia_obeum	0	0	7.85968e-06	4.52551e-06
PANTO-PWY: phosphopantothenate biosynthesis I|g__Blautia.s__Blautia_wexlerae	0	0	2.48095e-06	2.06509e-06
PANTO-PWY: phosphopantothenate biosynthesis I|g__Blautia.s__Ruminococcus_torques	0	0	2.62941e-05	1.53376e-05
PANTO-PWY: phosphopantothenate biosynthesis I|g__Cronobacter.s__Cronobacter_sakazakii	0	0	0	2.67651e-07
PANTO-PWY: phosphopantothenate biosynthesis I|g__Dorea.s__Dorea_formicigenerans	0	0	6.81648e-06	4.47096e-06
PANTO-PWY: phosphopantothenate biosynthesis I|g__Dorea.s__Dorea_longicatena	0	0	2.67582e-06	2.65949e-06
PANTO-PWY: phosphopantothenate biosynthesis I|g__Eubacterium.s__Eubacterium_hallii	0	0	1.2985e-06	1.48767e-06
PANTO-PWY: phosphopantothenate biosynthesis I|g__Eubacterium.s__Eubacterium_ramulus	0	0	7.32123e-07	9.48359e-07
PANTO-PWY: phosphopantothenate biosynthesis I|g__Klebsiella.s__Klebsiella_pneumoniae	0	0	1.05709e-05	1.60768e-05
PANTO-PWY: phosphopantothenate biosynthesis I|g__Klebsiella.s__Klebsiella_quasipneumoniae	0	0	4.29121e-05	7.15897e-05
PANTO-PWY: phosphopantothenate biosynthesis I|g__Klebsiella.s__Klebsiella_variicola	0	0	4.26746e-06	7.21391e-06
PANTO-PWY: phosphopantothenate biosynthesis I|g__Lachnospiraceae_unclassified.s__Eubacterium_rectale	0	0	3.76105e-06	2.47717e-06
PANTO-PWY: phosphopantothenate biosynthesis I|g__Megamonas.s__Megamonas_funiformis	0	0	1.17774e-06	1.39443e-06
PANTO-PWY: phosphopantothenate biosynthesis I|g__Megamonas.s__Megamonas_funiformis_CAG_377	0	0	9.75183e-06	5.31126e-06
PANTO-PWY: phosphopantothenate biosynthesis I|g__Megamonas.s__Megamonas_hypermegale	0	0	1.07932e-06	9.6979e-07
PANTO-PWY: phosphopantothenate biosynthesis I|g__Megasphaera.s__Megasphaera_sp_DISK_18	0	0	1.80829e-06	2.01838e-06
PANTO-PWY: phosphopantothenate biosynthesis I|g__Monoglobus.s__Monoglobus_pectinilyticus	0	0	0	5.38896e-08
PANTO-PWY: phosphopantothenate biosynthesis I|g__Odoribacter.s__Odoribacter_splanchnicus	0	0	1.55008e-06	1.58273e-06
PANTO-PWY: phosphopantothenate biosynthesis I|g__Parabacteroides.s__Parabacteroides_distasonis	0	0	4.59417e-06	2.96997e-06
PANTO-PWY: phosphopantothenate biosynthesis I|g__Parabacteroides.s__Parabacteroides_merdae	0	0	5.42166e-06	4.18754e-06
PANTO-PWY: phosphopantothenate biosynthesis I|g__Parasutterella.s__Parasutterella_excrementihominis	0	0	5.27035e-07	4.57476e-07
PANTO-PWY: phosphopantothenate biosynthesis I|g__Phascolarctobacterium.s__Phascolarctobacterium_faecium	0	0	5.97732e-06	4.46874e-06
PANTO-PWY: phosphopantothenate biosynthesis I|g__Roseburia.s__Roseburia_faecis	0	0	6.21756e-06	3.33523e-06
PANTO-PWY: phosphopantothenate biosynthesis I|g__Roseburia.s__Roseburia_hominis	0	0	0	5.76558e-08
PANTO-PWY: phosphopantothenate biosynthesis I|g__Ruminococcus.s__Ruminococcus_callidus	0	0	1.74466e-06	1.18803e-07
PANTO-PWY: phosphopantothenate biosynthesis I|unclassified	0	0	1.65849e-05	0
PANTOSYN-PWY: superpathway of coenzyme A biosynthesis I (bacteria)	0	0	0.000302834	0.000262871
PANTOSYN-PWY: superpathway of coenzyme A biosynthesis I (bacteria)|g__Acidaminococcus.s__Acidaminococcus_intestini	0	0	3.81268e-06	3.16483e-06
PANTOSYN-PWY: superpathway of coenzyme A biosynthesis I (bacteria)|g__Actinomyces.s__Actinomyces_sp_ICM47	0	0	0	1.26708e-07
PANTOSYN-PWY: superpathway of coenzyme A biosynthesis I (bacteria)|g__Agathobaculum.s__Agathobaculum_butyriciproducens	0	0	1.81852e-06	1.23165e-06
PANTOSYN-PWY: superpathway of coenzyme A biosynthesis I (bacteria)|g__Akkermansia.s__Akkermansia_muciniphila	0	0	3.27765e-06	2.46733e-06
PANTOSYN-PWY: superpathway of coenzyme A biosynthesis I (bacteria)|g__Alistipes.s__Alistipes_finegoldii	0	0	2.4427e-06	1.53279e-06
PANTOSYN-PWY: superpathway of coenzyme A biosynthesis I (bacteria)|g__Alistipes.s__Alistipes_putredinis	0	0	1.03569e-05	3.6666e-06
PANTOSYN-PWY: superpathway of coenzyme A biosynthesis I (bacteria)|g__Anaerostipes.s__Anaerostipes_hadrus	0	0	9.85724e-07	7.56868e-07
PANTOSYN-PWY: superpathway of coenzyme A biosynthesis I (bacteria)|g__Bacteroides.s__Bacteroides_cellulosilyticus	0	0	9.9914e-07	2.30519e-06
PANTOSYN-PWY: superpathway of coenzyme A biosynthesis I (bacteria)|g__Bacteroides.s__Bacteroides_dorei	0	0	5.92023e-06	5.44819e-06
PANTOSYN-PWY: superpathway of coenzyme A biosynthesis I (bacteria)|g__Bacteroides.s__Bacteroides_finegoldii	0	0	3.50257e-07	4.85115e-07
PANTOSYN-PWY: superpathway of coenzyme A biosynthesis I (bacteria)|g__Bacteroides.s__Bacteroides_fragilis	0	0	1.2264e-05	8.59291e-06
PANTOSYN-PWY: superpathway of coenzyme A biosynthesis I (bacteria)|g__Bacteroides.s__Bacteroides_stercoris	0	0	9.90942e-07	1.26708e-06
PANTOSYN-PWY: superpathway of coenzyme A biosynthesis I (bacteria)|g__Bacteroides.s__Bacteroides_thetaiotaomicron	0	0	2.7908e-06	2.6634e-06
PANTOSYN-PWY: superpathway of coenzyme A biosynthesis I (bacteria)|g__Bacteroides.s__Bacteroides_uniformis	0	0	2.87188e-06	2.08789e-06
PANTOSYN-PWY: superpathway of coenzyme A biosynthesis I (bacteria)|g__Bacteroides.s__Bacteroides_vulgatus	0	0	1.22342e-05	1.29862e-05
PANTOSYN-PWY: superpathway of coenzyme A biosynthesis I (bacteria)|g__Bacteroides.s__Bacteroides_xylanisolvens	0	0	1.13864e-06	1.33594e-06
PANTOSYN-PWY: superpathway of coenzyme A biosynthesis I (bacteria)|g__Blautia.s__Blautia_obeum	0	0	8.4922e-06	4.68984e-06
PANTOSYN-PWY: superpathway of coenzyme A biosynthesis I (bacteria)|g__Blautia.s__Ruminococcus_torques	0	0	3.32062e-05	1.98813e-05
PANTOSYN-PWY: superpathway of coenzyme A biosynthesis I (bacteria)|g__Cronobacter.s__Cronobacter_sakazakii	0	0	0	2.79651e-07
PANTOSYN-PWY: superpathway of coenzyme A biosynthesis I (bacteria)|g__Dorea.s__Dorea_formicigenerans	0	0	5.61552e-06	3.96322e-06
PANTOSYN-PWY: superpathway of coenzyme A biosynthesis I (bacteria)|g__Dorea.s__Dorea_longicatena	0	0	2.70173e-06	2.53361e-06
PANTOSYN-PWY: superpathway of coenzyme A biosynthesis I (bacteria)|g__Eubacterium.s__Eubacterium_hallii	0	0	1.01489e-06	9.12295e-07
PANTOSYN-PWY: superpathway of coenzyme A biosynthesis I (bacteria)|g__Eubacterium.s__Eubacterium_ramulus	0	0	0	5.72813e-07
PANTOSYN-PWY: superpathway of coenzyme A biosynthesis I (bacteria)|g__Klebsiella.s__Klebsiella_pneumoniae	0	0	5.34669e-06	9.65854e-06
PANTOSYN-PWY: superpathway of coenzyme A biosynthesis I (bacteria)|g__Klebsiella.s__Klebsiella_quasipneumoniae	0	0	3.83534e-05	6.44014e-05
PANTOSYN-PWY: superpathway of coenzyme A biosynthesis I (bacteria)|g__Klebsiella.s__Klebsiella_variicola	0	0	4.53347e-06	7.70894e-06
PANTOSYN-PWY: superpathway of coenzyme A biosynthesis I (bacteria)|g__Lachnospiraceae_unclassified.s__Eubacterium_rectale	0	0	4.5468e-06	2.8902e-06
PANTOSYN-PWY: superpathway of coenzyme A biosynthesis I (bacteria)|g__Odoribacter.s__Odoribacter_splanchnicus	0	0	1.37315e-06	1.64036e-06
PANTOSYN-PWY: superpathway of coenzyme A biosynthesis I (bacteria)|g__Parabacteroides.s__Parabacteroides_distasonis	0	0	4.13401e-06	2.75277e-06
PANTOSYN-PWY: superpathway of coenzyme A biosynthesis I (bacteria)|g__Parabacteroides.s__Parabacteroides_merdae	0	0	4.14764e-06	3.9279e-06
PANTOSYN-PWY: superpathway of coenzyme A biosynthesis I (bacteria)|g__Phascolarctobacterium.s__Phascolarctobacterium_faecium	0	0	5.4849e-06	4.37144e-06
PANTOSYN-PWY: superpathway of coenzyme A biosynthesis I (bacteria)|g__Roseburia.s__Roseburia_faecis	0	0	8.05395e-06	4.1535e-06
PANTOSYN-PWY: superpathway of coenzyme A biosynthesis I (bacteria)|g__Roseburia.s__Roseburia_hominis	0	0	0	8.90813e-08
PANTOSYN-PWY: superpathway of coenzyme A biosynthesis I (bacteria)|g__Ruminococcus.s__Ruminococcus_callidus	0	0	2.12912e-06	1.15443e-07
PANTOSYN-PWY: superpathway of coenzyme A biosynthesis I (bacteria)|unclassified	0	0	1.73671e-05	0
PENTOSE-P-PWY: pentose phosphate pathway	0	0	0.00018452	0.000191274
PENTOSE-P-PWY: pentose phosphate pathway|g__Bacteroides.s__Bacteroides_cellulosilyticus	0	0	1.11755e-05	9.18787e-06
PENTOSE-P-PWY: pentose phosphate pathway|g__Bacteroides.s__Bacteroides_fragilis	0	0	1.01935e-07	1.48609e-07
PENTOSE-P-PWY: pentose phosphate pathway|g__Bacteroides.s__Bacteroides_xylanisolvens	0	0	6.85879e-07	8.25603e-07
PENTOSE-P-PWY: pentose phosphate pathway|g__Cronobacter.s__Cronobacter_sakazakii	0	0	0	6.51323e-07
PENTOSE-P-PWY: pentose phosphate pathway|g__Haemophilus.s__Haemophilus_parahaemolyticus	0	0	0	6.82511e-08
PENTOSE-P-PWY: pentose phosphate pathway|g__Haemophilus.s__Haemophilus_parainfluenzae	0	0	3.67478e-06	7.04122e-06
PENTOSE-P-PWY: pentose phosphate pathway|g__Haemophilus.s__Haemophilus_paraphrohaemolyticus	0	0	1.66648e-07	1.03183e-07
PENTOSE-P-PWY: pentose phosphate pathway|g__Haemophilus.s__Haemophilus_sputorum	0	0	0	2.0566e-07
PENTOSE-P-PWY: pentose phosphate pathway|g__Klebsiella.s__Klebsiella_pneumoniae	0	0	1.53807e-05	2.90924e-05
PENTOSE-P-PWY: pentose phosphate pathway|g__Klebsiella.s__Klebsiella_quasipneumoniae	0	0	3.66457e-06	5.95086e-06
PENTOSE-P-PWY: pentose phosphate pathway|g__Klebsiella.s__Klebsiella_variicola	0	0	5.60249e-06	9.11713e-06
PENTOSE-P-PWY: pentose phosphate pathway|g__Lactobacillus.s__Lactobacillus_fermentum	0	0	0	3.40332e-07
PENTOSE-P-PWY: pentose phosphate pathway|g__Parabacteroides.s__Parabacteroides_distasonis	0	0	3.98826e-06	2.62331e-06
PEPTIDOGLYCANSYN-PWY: peptidoglycan biosynthesis I (meso-diaminopimelate containing)	0	0	0.000336751	0.000276914
PEPTIDOGLYCANSYN-PWY: peptidoglycan biosynthesis I (meso-diaminopimelate containing)|g__Acidaminococcus.s__Acidaminococcus_intestini	0	0	4.38857e-06	2.98888e-06
PEPTIDOGLYCANSYN-PWY: peptidoglycan biosynthesis I (meso-diaminopimelate containing)|g__Actinomyces.s__Actinomyces_sp_ICM47	0	0	0	1.80205e-07
PEPTIDOGLYCANSYN-PWY: peptidoglycan biosynthesis I (meso-diaminopimelate containing)|g__Adlercreutzia.s__Adlercreutzia_equolifaciens	0	0	1.56462e-07	1.6981e-07
PEPTIDOGLYCANSYN-PWY: peptidoglycan biosynthesis I (meso-diaminopimelate containing)|g__Agathobaculum.s__Agathobaculum_butyriciproducens	0	0	1.80503e-06	1.07934e-06
PEPTIDOGLYCANSYN-PWY: peptidoglycan biosynthesis I (meso-diaminopimelate containing)|g__Akkermansia.s__Akkermansia_muciniphila	0	0	3.22789e-06	2.44745e-06
PEPTIDOGLYCANSYN-PWY: peptidoglycan biosynthesis I (meso-diaminopimelate containing)|g__Alistipes.s__Alistipes_finegoldii	0	0	1.69424e-06	1.11069e-06
PEPTIDOGLYCANSYN-PWY: peptidoglycan biosynthesis I (meso-diaminopimelate containing)|g__Alistipes.s__Alistipes_putredinis	0	0	9.59884e-06	3.76545e-06
PEPTIDOGLYCANSYN-PWY: peptidoglycan biosynthesis I (meso-diaminopimelate containing)|g__Anaerostipes.s__Anaerostipes_hadrus	0	0	1.14214e-06	6.0832e-07
PEPTIDOGLYCANSYN-PWY: peptidoglycan biosynthesis I (meso-diaminopimelate containing)|g__Asaccharobacter.s__Asaccharobacter_celatus	0	0	1.64404e-07	2.67972e-07
PEPTIDOGLYCANSYN-PWY: peptidoglycan biosynthesis I (meso-diaminopimelate containing)|g__Bacteroides.s__Bacteroides_cellulosilyticus	0	0	1.28924e-06	1.56882e-06
PEPTIDOGLYCANSYN-PWY: peptidoglycan biosynthesis I (meso-diaminopimelate containing)|g__Bacteroides.s__Bacteroides_dorei	0	0	6.5442e-06	6.2075e-06
PEPTIDOGLYCANSYN-PWY: peptidoglycan biosynthesis I (meso-diaminopimelate containing)|g__Bacteroides.s__Bacteroides_finegoldii	0	0	4.24361e-07	5.42238e-07
PEPTIDOGLYCANSYN-PWY: peptidoglycan biosynthesis I (meso-diaminopimelate containing)|g__Bacteroides.s__Bacteroides_fragilis	0	0	8.31921e-06	6.02112e-06
PEPTIDOGLYCANSYN-PWY: peptidoglycan biosynthesis I (meso-diaminopimelate containing)|g__Bacteroides.s__Bacteroides_galacturonicus	0	0	2.40477e-06	1.81818e-06
PEPTIDOGLYCANSYN-PWY: peptidoglycan biosynthesis I (meso-diaminopimelate containing)|g__Bacteroides.s__Bacteroides_stercoris	0	0	8.17164e-07	1.27389e-06
PEPTIDOGLYCANSYN-PWY: peptidoglycan biosynthesis I (meso-diaminopimelate containing)|g__Bacteroides.s__Bacteroides_thetaiotaomicron	0	0	3.72999e-06	2.80566e-06
PEPTIDOGLYCANSYN-PWY: peptidoglycan biosynthesis I (meso-diaminopimelate containing)|g__Bacteroides.s__Bacteroides_uniformis	0	0	2.76658e-06	2.13747e-06
PEPTIDOGLYCANSYN-PWY: peptidoglycan biosynthesis I (meso-diaminopimelate containing)|g__Bacteroides.s__Bacteroides_vulgatus	0	0	1.26208e-05	1.36309e-05
PEPTIDOGLYCANSYN-PWY: peptidoglycan biosynthesis I (meso-diaminopimelate containing)|g__Bacteroides.s__Bacteroides_xylanisolvens	0	0	9.24832e-07	1.0069e-06
PEPTIDOGLYCANSYN-PWY: peptidoglycan biosynthesis I (meso-diaminopimelate containing)|g__Bifidobacterium.s__Bifidobacterium_longum	0	0	6.53887e-07	5.01063e-07
PEPTIDOGLYCANSYN-PWY: peptidoglycan biosynthesis I (meso-diaminopimelate containing)|g__Bilophila.s__Bilophila_wadsworthia	0	0	2.34838e-06	1.69976e-06
PEPTIDOGLYCANSYN-PWY: peptidoglycan biosynthesis I (meso-diaminopimelate containing)|g__Blautia.s__Blautia_obeum	0	0	1.17217e-05	8.56445e-06
PEPTIDOGLYCANSYN-PWY: peptidoglycan biosynthesis I (meso-diaminopimelate containing)|g__Blautia.s__Blautia_sp_CAG_257	0	0	3.89334e-07	3.26532e-07
PEPTIDOGLYCANSYN-PWY: peptidoglycan biosynthesis I (meso-diaminopimelate containing)|g__Blautia.s__Blautia_wexlerae	0	0	2.86027e-06	2.50552e-06
PEPTIDOGLYCANSYN-PWY: peptidoglycan biosynthesis I (meso-diaminopimelate containing)|g__Blautia.s__Ruminococcus_torques	0	0	4.71617e-05	2.86869e-05
PEPTIDOGLYCANSYN-PWY: peptidoglycan biosynthesis I (meso-diaminopimelate containing)|g__Clostridium.s__Clostridium_sp_CAG_58	0	0	5.0636e-07	4.03884e-07
PEPTIDOGLYCANSYN-PWY: peptidoglycan biosynthesis I (meso-diaminopimelate containing)|g__Collinsella.s__Collinsella_aerofaciens	0	0	2.93611e-06	1.96653e-06
PEPTIDOGLYCANSYN-PWY: peptidoglycan biosynthesis I (meso-diaminopimelate containing)|g__Coprococcus.s__Coprococcus_catus	0	0	1.32819e-06	8.80016e-07
PEPTIDOGLYCANSYN-PWY: peptidoglycan biosynthesis I (meso-diaminopimelate containing)|g__Cronobacter.s__Cronobacter_sakazakii	0	0	0	2.79092e-07
PEPTIDOGLYCANSYN-PWY: peptidoglycan biosynthesis I (meso-diaminopimelate containing)|g__Dialister.s__Dialister_invisus	0	0	2.68997e-06	1.89541e-06
PEPTIDOGLYCANSYN-PWY: peptidoglycan biosynthesis I (meso-diaminopimelate containing)|g__Dorea.s__Dorea_formicigenerans	0	0	5.09675e-06	3.39166e-06
PEPTIDOGLYCANSYN-PWY: peptidoglycan biosynthesis I (meso-diaminopimelate containing)|g__Dorea.s__Dorea_longicatena	0	0	3.91682e-06	3.80778e-06
PEPTIDOGLYCANSYN-PWY: peptidoglycan biosynthesis I (meso-diaminopimelate containing)|g__Dorea.s__Dorea_sp_CAG_317	0	0	6.22406e-07	3.45417e-07
PEPTIDOGLYCANSYN-PWY: peptidoglycan biosynthesis I (meso-diaminopimelate containing)|g__Eubacterium.s__Eubacterium_hallii	0	0	1.30538e-06	8.8121e-07
PEPTIDOGLYCANSYN-PWY: peptidoglycan biosynthesis I (meso-diaminopimelate containing)|g__Eubacterium.s__Eubacterium_sp_CAG_251	0	0	1.68783e-06	1.3992e-06
PEPTIDOGLYCANSYN-PWY: peptidoglycan biosynthesis I (meso-diaminopimelate containing)|g__Eubacterium.s__Eubacterium_sp_CAG_274	0	0	1.91827e-06	1.47757e-06
PEPTIDOGLYCANSYN-PWY: peptidoglycan biosynthesis I (meso-diaminopimelate containing)|g__Faecalibacterium.s__Faecalibacterium_prausnitzii	0	0	6.99941e-06	7.37947e-06
PEPTIDOGLYCANSYN-PWY: peptidoglycan biosynthesis I (meso-diaminopimelate containing)|g__Firmicutes_unclassified.s__Firmicutes_bacterium_CAG_83	0	0	1.24667e-06	1.358e-06
PEPTIDOGLYCANSYN-PWY: peptidoglycan biosynthesis I (meso-diaminopimelate containing)|g__Flavonifractor.s__Flavonifractor_plautii	0	0	5.01421e-07	3.08214e-07
PEPTIDOGLYCANSYN-PWY: peptidoglycan biosynthesis I (meso-diaminopimelate containing)|g__Fusicatenibacter.s__Fusicatenibacter_saccharivorans	0	0	2.6399e-06	1.51707e-06
PEPTIDOGLYCANSYN-PWY: peptidoglycan biosynthesis I (meso-diaminopimelate containing)|g__Gemmiger.s__Gemmiger_formicilis	0	0	2.27378e-06	1.5583e-06
PEPTIDOGLYCANSYN-PWY: peptidoglycan biosynthesis I (meso-diaminopimelate containing)|g__Haemophilus.s__Haemophilus_parahaemolyticus	0	0	0	5.37695e-08
PEPTIDOGLYCANSYN-PWY: peptidoglycan biosynthesis I (meso-diaminopimelate containing)|g__Haemophilus.s__Haemophilus_parainfluenzae	0	0	3.63804e-06	6.00874e-06
PEPTIDOGLYCANSYN-PWY: peptidoglycan biosynthesis I (meso-diaminopimelate containing)|g__Haemophilus.s__Haemophilus_paraphrohaemolyticus	0	0	0	7.11373e-08
PEPTIDOGLYCANSYN-PWY: peptidoglycan biosynthesis I (meso-diaminopimelate containing)|g__Haemophilus.s__Haemophilus_sputorum	0	0	0	1.77941e-07
PEPTIDOGLYCANSYN-PWY: peptidoglycan biosynthesis I (meso-diaminopimelate containing)|g__Intestinimonas.s__Intestinimonas_butyriciproducens	0	0	0	1.16871e-07
PEPTIDOGLYCANSYN-PWY: peptidoglycan biosynthesis I (meso-diaminopimelate containing)|g__Klebsiella.s__Klebsiella_pneumoniae	0	0	6.78809e-06	1.26801e-05
PEPTIDOGLYCANSYN-PWY: peptidoglycan biosynthesis I (meso-diaminopimelate containing)|g__Klebsiella.s__Klebsiella_quasipneumoniae	0	0	2.57751e-05	3.87916e-05
PEPTIDOGLYCANSYN-PWY: peptidoglycan biosynthesis I (meso-diaminopimelate containing)|g__Klebsiella.s__Klebsiella_variicola	0	0	3.46484e-06	4.87479e-06
PEPTIDOGLYCANSYN-PWY: peptidoglycan biosynthesis I (meso-diaminopimelate containing)|g__Lachnospira.s__Lachnospira_pectinoschiza	0	0	2.88095e-06	2.08441e-06
PEPTIDOGLYCANSYN-PWY: peptidoglycan biosynthesis I (meso-diaminopimelate containing)|g__Lachnospiraceae_unclassified.s__Eubacterium_rectale	0	0	3.02822e-06	1.80735e-06
PEPTIDOGLYCANSYN-PWY: peptidoglycan biosynthesis I (meso-diaminopimelate containing)|g__Lactobacillus.s__Lactobacillus_fermentum	0	0	0	2.65432e-07
PEPTIDOGLYCANSYN-PWY: peptidoglycan biosynthesis I (meso-diaminopimelate containing)|g__Lactobacillus.s__Lactobacillus_rogosae	0	0	2.78337e-06	2.29204e-06
PEPTIDOGLYCANSYN-PWY: peptidoglycan biosynthesis I (meso-diaminopimelate containing)|g__Lawsonibacter.s__Lawsonibacter_asaccharolyticus	0	0	0	1.68681e-07
PEPTIDOGLYCANSYN-PWY: peptidoglycan biosynthesis I (meso-diaminopimelate containing)|g__Megamonas.s__Megamonas_funiformis	0	0	1.67048e-06	1.2842e-06
PEPTIDOGLYCANSYN-PWY: peptidoglycan biosynthesis I (meso-diaminopimelate containing)|g__Megamonas.s__Megamonas_hypermegale	0	0	3.72367e-07	4.35582e-07
PEPTIDOGLYCANSYN-PWY: peptidoglycan biosynthesis I (meso-diaminopimelate containing)|g__Megasphaera.s__Megasphaera_sp_DISK_18	0	0	2.15952e-06	2.16945e-06
PEPTIDOGLYCANSYN-PWY: peptidoglycan biosynthesis I (meso-diaminopimelate containing)|g__Monoglobus.s__Monoglobus_pectinilyticus	0	0	0	9.9472e-08
PEPTIDOGLYCANSYN-PWY: peptidoglycan biosynthesis I (meso-diaminopimelate containing)|g__Odoribacter.s__Odoribacter_splanchnicus	0	0	1.39311e-06	1.49242e-06
PEPTIDOGLYCANSYN-PWY: peptidoglycan biosynthesis I (meso-diaminopimelate containing)|g__Parabacteroides.s__Parabacteroides_distasonis	0	0	4.31089e-06	3.0408e-06
PEPTIDOGLYCANSYN-PWY: peptidoglycan biosynthesis I (meso-diaminopimelate containing)|g__Parabacteroides.s__Parabacteroides_merdae	0	0	5.04959e-06	4.27073e-06
PEPTIDOGLYCANSYN-PWY: peptidoglycan biosynthesis I (meso-diaminopimelate containing)|g__Parasutterella.s__Parasutterella_excrementihominis	0	0	6.87814e-07	3.59106e-07
PEPTIDOGLYCANSYN-PWY: peptidoglycan biosynthesis I (meso-diaminopimelate containing)|g__Phascolarctobacterium.s__Phascolarctobacterium_faecium	0	0	5.86805e-06	4.1477e-06
PEPTIDOGLYCANSYN-PWY: peptidoglycan biosynthesis I (meso-diaminopimelate containing)|g__Roseburia.s__Roseburia_faecis	0	0	9.4085e-06	5.24161e-06
PEPTIDOGLYCANSYN-PWY: peptidoglycan biosynthesis I (meso-diaminopimelate containing)|g__Roseburia.s__Roseburia_hominis	0	0	0	1.87066e-07
PEPTIDOGLYCANSYN-PWY: peptidoglycan biosynthesis I (meso-diaminopimelate containing)|g__Roseburia.s__Roseburia_inulinivorans	0	0	0	2.26259e-07
PEPTIDOGLYCANSYN-PWY: peptidoglycan biosynthesis I (meso-diaminopimelate containing)|g__Ruminococcus.s__Ruminococcus_callidus	0	0	3.09317e-06	3.23435e-07
PEPTIDOGLYCANSYN-PWY: peptidoglycan biosynthesis I (meso-diaminopimelate containing)|g__Ruthenibacterium.s__Ruthenibacterium_lactatiformans	0	0	0	1.03389e-07
PEPTIDOGLYCANSYN-PWY: peptidoglycan biosynthesis I (meso-diaminopimelate containing)|g__Streptococcus.s__Streptococcus_parasanguinis	0	0	0	6.78822e-07
PEPTIDOGLYCANSYN-PWY: peptidoglycan biosynthesis I (meso-diaminopimelate containing)|g__Streptococcus.s__Streptococcus_salivarius	0	0	5.27248e-06	6.99403e-06
PEPTIDOGLYCANSYN-PWY: peptidoglycan biosynthesis I (meso-diaminopimelate containing)|g__Veillonella.s__Veillonella_atypica	0	0	6.91847e-07	7.51095e-07
PEPTIDOGLYCANSYN-PWY: peptidoglycan biosynthesis I (meso-diaminopimelate containing)|g__Veillonella.s__Veillonella_infantium	0	0	4.01826e-07	8.31075e-07
PEPTIDOGLYCANSYN-PWY: peptidoglycan biosynthesis I (meso-diaminopimelate containing)|g__Veillonella.s__Veillonella_parvula	0	0	5.96253e-08	2.69493e-07
PEPTIDOGLYCANSYN-PWY: peptidoglycan biosynthesis I (meso-diaminopimelate containing)|unclassified	0	0	2.59536e-05	0
PHOSLIPSYN-PWY: superpathway of phospholipid biosynthesis I (bacteria)	0	0	0.000220635	0.000255816
PHOSLIPSYN-PWY: superpathway of phospholipid biosynthesis I (bacteria)|g__Cronobacter.s__Cronobacter_sakazakii	0	0	0	3.92815e-07
PHOSLIPSYN-PWY: superpathway of phospholipid biosynthesis I (bacteria)|g__Fusicatenibacter.s__Fusicatenibacter_saccharivorans	0	0	2.07996e-06	1.36691e-06
PHOSLIPSYN-PWY: superpathway of phospholipid biosynthesis I (bacteria)|g__Haemophilus.s__Haemophilus_parahaemolyticus	0	0	0	1.75729e-08
PHOSLIPSYN-PWY: superpathway of phospholipid biosynthesis I (bacteria)|g__Haemophilus.s__Haemophilus_parainfluenzae	0	0	4.24439e-06	7.62238e-06
PHOSLIPSYN-PWY: superpathway of phospholipid biosynthesis I (bacteria)|g__Haemophilus.s__Haemophilus_sputorum	0	0	0	3.2199e-07
PHOSLIPSYN-PWY: superpathway of phospholipid biosynthesis I (bacteria)|g__Klebsiella.s__Klebsiella_pneumoniae	0	0	1.08039e-05	2.08478e-05
PHOSLIPSYN-PWY: superpathway of phospholipid biosynthesis I (bacteria)|g__Klebsiella.s__Klebsiella_quasipneumoniae	0	0	4.25837e-05	7.25795e-05
PHOSLIPSYN-PWY: superpathway of phospholipid biosynthesis I (bacteria)|g__Klebsiella.s__Klebsiella_variicola	0	0	4.57977e-06	7.92275e-06
PHOSLIPSYN-PWY: superpathway of phospholipid biosynthesis I (bacteria)|unclassified	0	0	5.04713e-06	0
POLYAMINSYN3-PWY: superpathway of polyamine biosynthesis II	0	0	2.94914e-05	1.8471e-05
POLYAMSYN-PWY: superpathway of polyamine biosynthesis I	0	0	0.000148355	0.000177767
POLYAMSYN-PWY: superpathway of polyamine biosynthesis I|g__Cronobacter.s__Cronobacter_sakazakii	0	0	0	2.82365e-07
POLYAMSYN-PWY: superpathway of polyamine biosynthesis I|g__Klebsiella.s__Klebsiella_pneumoniae	0	0	9.00652e-06	1.42269e-05
POLYAMSYN-PWY: superpathway of polyamine biosynthesis I|g__Klebsiella.s__Klebsiella_quasipneumoniae	0	0	3.93641e-05	6.55237e-05
POLYAMSYN-PWY: superpathway of polyamine biosynthesis I|g__Klebsiella.s__Klebsiella_variicola	0	0	4.05021e-06	6.29935e-06
POLYAMSYN-PWY: superpathway of polyamine biosynthesis I|unclassified	0	0	2.42837e-06	0
POLYISOPRENSYN-PWY: polyisoprenoid biosynthesis (E. coli)	0	0	8.76831e-05	0.000114106
POLYISOPRENSYN-PWY: polyisoprenoid biosynthesis (E. coli)|g__Cronobacter.s__Cronobacter_sakazakii	0	0	0	3.478e-07
POLYISOPRENSYN-PWY: polyisoprenoid biosynthesis (E. coli)|g__Klebsiella.s__Klebsiella_pneumoniae	0	0	1.88736e-05	3.56145e-05
POLYISOPRENSYN-PWY: polyisoprenoid biosynthesis (E. coli)|g__Klebsiella.s__Klebsiella_quasipneumoniae	0	0	2.24077e-05	4.27807e-05
POLYISOPRENSYN-PWY: polyisoprenoid biosynthesis (E. coli)|g__Klebsiella.s__Klebsiella_variicola	0	0	3.9119e-06	6.27961e-06
POLYISOPRENSYN-PWY: polyisoprenoid biosynthesis (E. coli)|unclassified	0	0	3.97582e-07	0
PPGPPMET-PWY: ppGpp metabolism	0	0	9.93496e-05	0.000148652
PPGPPMET-PWY: ppGpp metabolism|g__Cronobacter.s__Cronobacter_sakazakii	0	0	0	3.76614e-07
PPGPPMET-PWY: ppGpp metabolism|g__Haemophilus.s__Haemophilus_parainfluenzae	0	0	2.91662e-06	6.16581e-06
PPGPPMET-PWY: ppGpp metabolism|g__Klebsiella.s__Klebsiella_pneumoniae	0	0	6.45189e-06	1.07836e-05
PPGPPMET-PWY: ppGpp metabolism|g__Klebsiella.s__Klebsiella_quasipneumoniae	0	0	3.91577e-05	7.08238e-05
PPGPPMET-PWY: ppGpp metabolism|g__Klebsiella.s__Klebsiella_variicola	0	0	3.24067e-06	5.57799e-06
PPGPPMET-PWY: ppGpp metabolism|unclassified	0	0	5.67656e-07	0
PROPFERM-PWY: superpathway of L-alanine fermentation (Stickland reaction)	0	0	1.2965e-06	3.43042e-07
PROTOCATECHUATE-ORTHO-CLEAVAGE-PWY: protocatechuate degradation II (ortho-cleavage pathway)	0	0	6.44899e-05	0.000134398
PROTOCATECHUATE-ORTHO-CLEAVAGE-PWY: protocatechuate degradation II (ortho-cleavage pathway)|g__Klebsiella.s__Klebsiella_pneumoniae	0	0	7.16307e-06	1.86068e-05
PROTOCATECHUATE-ORTHO-CLEAVAGE-PWY: protocatechuate degradation II (ortho-cleavage pathway)|g__Klebsiella.s__Klebsiella_quasipneumoniae	0	0	4.75779e-05	9.80188e-05
PROTOCATECHUATE-ORTHO-CLEAVAGE-PWY: protocatechuate degradation II (ortho-cleavage pathway)|g__Klebsiella.s__Klebsiella_variicola	0	0	5.7831e-06	1.16147e-05
PRPP-PWY: superpathway of histidine, purine, and pyrimidine biosynthesis	0	0	0.000166306	0.000208085
PRPP-PWY: superpathway of histidine, purine, and pyrimidine biosynthesis|g__Klebsiella.s__Klebsiella_pneumoniae	0	0	7.90308e-06	1.61528e-05
PRPP-PWY: superpathway of histidine, purine, and pyrimidine biosynthesis|g__Klebsiella.s__Klebsiella_quasipneumoniae	0	0	2.55148e-05	4.47138e-05
PRPP-PWY: superpathway of histidine, purine, and pyrimidine biosynthesis|g__Klebsiella.s__Klebsiella_variicola	0	0	3.13688e-06	4.3636e-06
PWY-1042: glycolysis IV	0	0	0.000522781	0.000558959
PWY-1042: glycolysis IV|g__Acidaminococcus.s__Acidaminococcus_intestini	0	0	3.54616e-06	3.1001e-06
PWY-1042: glycolysis IV|g__Agathobaculum.s__Agathobaculum_butyriciproducens	0	0	2.24634e-06	1.38789e-06
PWY-1042: glycolysis IV|g__Alistipes.s__Alistipes_putredinis	0	0	9.25448e-06	3.7349e-06
PWY-1042: glycolysis IV|g__Alistipes.s__Alistipes_shahii	0	0	1.34146e-05	9.62528e-06
PWY-1042: glycolysis IV|g__Anaerostipes.s__Anaerostipes_hadrus	0	0	2.51426e-06	1.45903e-06
PWY-1042: glycolysis IV|g__Bacteroides.s__Bacteroides_cellulosilyticus	0	0	1.25329e-05	9.49877e-06
PWY-1042: glycolysis IV|g__Bacteroides.s__Bacteroides_dorei	0	0	1.03526e-05	1.00555e-05
PWY-1042: glycolysis IV|g__Bacteroides.s__Bacteroides_fragilis	0	0	1.0828e-05	8.15159e-06
PWY-1042: glycolysis IV|g__Bacteroides.s__Bacteroides_vulgatus	0	0	1.8111e-05	2.0663e-05
PWY-1042: glycolysis IV|g__Blautia.s__Blautia_obeum	0	0	1.08717e-05	7.37184e-06
PWY-1042: glycolysis IV|g__Blautia.s__Blautia_wexlerae	0	0	4.79476e-06	3.28819e-06
PWY-1042: glycolysis IV|g__Blautia.s__Ruminococcus_torques	0	0	6.06991e-05	3.57954e-05
PWY-1042: glycolysis IV|g__Clostridium.s__Clostridium_bolteae_CAG_59	0	0	4.27993e-07	1.85016e-07
PWY-1042: glycolysis IV|g__Clostridium.s__Clostridium_sp_CAG_58	0	0	6.33991e-07	5.32122e-07
PWY-1042: glycolysis IV|g__Coprococcus.s__Coprococcus_catus	0	0	1.65101e-06	1.04649e-06
PWY-1042: glycolysis IV|g__Cronobacter.s__Cronobacter_sakazakii	0	0	9.74602e-08	8.52905e-07
PWY-1042: glycolysis IV|g__Dorea.s__Dorea_formicigenerans	0	0	5.54323e-06	3.839e-06
PWY-1042: glycolysis IV|g__Dorea.s__Dorea_longicatena	0	0	5.54949e-06	6.44879e-06
PWY-1042: glycolysis IV|g__Dorea.s__Dorea_sp_CAG_317	0	0	0	2.91592e-07
PWY-1042: glycolysis IV|g__Eubacterium.s__Eubacterium_hallii	0	0	2.85858e-06	2.67216e-06
PWY-1042: glycolysis IV|g__Faecalibacterium.s__Faecalibacterium_prausnitzii	0	0	1.71501e-05	1.73728e-05
PWY-1042: glycolysis IV|g__Flavonifractor.s__Flavonifractor_plautii	0	0	4.88321e-07	4.91785e-07
PWY-1042: glycolysis IV|g__Fusicatenibacter.s__Fusicatenibacter_saccharivorans	0	0	1.90954e-06	1.72854e-06
PWY-1042: glycolysis IV|g__Haemophilus.s__Haemophilus_parahaemolyticus	0	0	1.60141e-07	1.11288e-07
PWY-1042: glycolysis IV|g__Haemophilus.s__Haemophilus_parainfluenzae	0	0	4.02405e-06	7.60522e-06
PWY-1042: glycolysis IV|g__Haemophilus.s__Haemophilus_paraphrohaemolyticus	0	0	3.86935e-08	1.08005e-08
PWY-1042: glycolysis IV|g__Haemophilus.s__Haemophilus_sputorum	0	0	0	2.43371e-07
PWY-1042: glycolysis IV|g__Intestinimonas.s__Intestinimonas_butyriciproducens	0	0	0	1.56115e-07
PWY-1042: glycolysis IV|g__Klebsiella.s__Klebsiella_pneumoniae	0	0	6.84955e-05	0.000128693
PWY-1042: glycolysis IV|g__Klebsiella.s__Klebsiella_quasipneumoniae	0	0	6.8394e-05	0.000135847
PWY-1042: glycolysis IV|g__Klebsiella.s__Klebsiella_variicola	0	0	1.23368e-05	2.01478e-05
PWY-1042: glycolysis IV|g__Lachnoclostridium.s__Clostridium_asparagiforme	0	0	0	1.22326e-07
PWY-1042: glycolysis IV|g__Lachnoclostridium.s__Clostridium_bolteae	0	0	3.80391e-07	4.29051e-08
PWY-1042: glycolysis IV|g__Lachnospiraceae_unclassified.s__Eubacterium_rectale	0	0	3.91565e-06	2.67579e-06
PWY-1042: glycolysis IV|g__Roseburia.s__Roseburia_faecis	0	0	1.19116e-05	6.07938e-06
PWY-1042: glycolysis IV|g__Roseburia.s__Roseburia_hominis	0	0	0	1.97732e-07
PWY-1042: glycolysis IV|g__Roseburia.s__Roseburia_inulinivorans	0	0	0	4.28873e-07
PWY-1042: glycolysis IV|g__Ruthenibacterium.s__Ruthenibacterium_lactatiformans	0	0	0	1.49253e-07
PWY-1042: glycolysis IV|g__Streptococcus.s__Streptococcus_mitis	0	0	4.00205e-07	1.36781e-07
PWY-1042: glycolysis IV|g__Streptococcus.s__Streptococcus_parasanguinis	0	0	1.32452e-06	1.51087e-06
PWY-1042: glycolysis IV|g__Streptococcus.s__Streptococcus_salivarius	0	0	5.89294e-06	6.29601e-06
PWY-1042: glycolysis IV|g__Veillonella.s__Veillonella_atypica	0	0	4.1636e-07	5.85914e-07
PWY-1042: glycolysis IV|g__Veillonella.s__Veillonella_parvula	0	0	0	8.5321e-08
PWY-1042: glycolysis IV|unclassified	0	0	1.59439e-05	0
PWY-1269: CMP-3-deoxy-D-manno-octulosonate biosynthesis	0	0	0.000145432	0.00019627
PWY-1269: CMP-3-deoxy-D-manno-octulosonate biosynthesis|g__Alistipes.s__Alistipes_shahii	0	0	1.07933e-05	7.90877e-06
PWY-1269: CMP-3-deoxy-D-manno-octulosonate biosynthesis|g__Bacteroides.s__Bacteroides_finegoldii	0	0	3.83154e-07	4.34362e-07
PWY-1269: CMP-3-deoxy-D-manno-octulosonate biosynthesis|g__Bacteroides.s__Bacteroides_fragilis	0	0	9.8198e-07	1.59538e-06
PWY-1269: CMP-3-deoxy-D-manno-octulosonate biosynthesis|g__Bacteroides.s__Bacteroides_thetaiotaomicron	0	0	2.76771e-06	2.48011e-06
PWY-1269: CMP-3-deoxy-D-manno-octulosonate biosynthesis|g__Bacteroides.s__Bacteroides_uniformis	0	0	2.34265e-06	1.9079e-06
PWY-1269: CMP-3-deoxy-D-manno-octulosonate biosynthesis|g__Bacteroides.s__Bacteroides_xylanisolvens	0	0	1.59325e-06	1.0493e-06
PWY-1269: CMP-3-deoxy-D-manno-octulosonate biosynthesis|g__Cronobacter.s__Cronobacter_sakazakii	0	0	0	4.95024e-07
PWY-1269: CMP-3-deoxy-D-manno-octulosonate biosynthesis|g__Haemophilus.s__Haemophilus_parahaemolyticus	0	0	8.1421e-08	2.08856e-08
PWY-1269: CMP-3-deoxy-D-manno-octulosonate biosynthesis|g__Haemophilus.s__Haemophilus_parainfluenzae	0	0	2.97851e-06	6.56539e-06
PWY-1269: CMP-3-deoxy-D-manno-octulosonate biosynthesis|g__Haemophilus.s__Haemophilus_paraphrohaemolyticus	0	0	2.09714e-07	3.70123e-08
PWY-1269: CMP-3-deoxy-D-manno-octulosonate biosynthesis|g__Haemophilus.s__Haemophilus_sputorum	0	0	0	2.83296e-07
PWY-1269: CMP-3-deoxy-D-manno-octulosonate biosynthesis|g__Klebsiella.s__Klebsiella_pneumoniae	0	0	1.12946e-05	1.96684e-05
PWY-1269: CMP-3-deoxy-D-manno-octulosonate biosynthesis|g__Klebsiella.s__Klebsiella_quasipneumoniae	0	0	3.31892e-05	6.08563e-05
PWY-1269: CMP-3-deoxy-D-manno-octulosonate biosynthesis|g__Klebsiella.s__Klebsiella_variicola	0	0	3.32687e-06	7.3739e-06
PWY-1269: CMP-3-deoxy-D-manno-octulosonate biosynthesis|g__Megasphaera.s__Megasphaera_sp_DISK_18	0	0	3.23728e-06	2.29908e-06
PWY-1541: superpathway of taurine degradation	0	0	5.29003e-06	8.95714e-06
PWY-1541: superpathway of taurine degradation|g__Klebsiella.s__Klebsiella_pneumoniae	0	0	5.16151e-06	8.80931e-06
PWY-1861: formaldehyde assimilation II (assimilatory RuMP Cycle)	0	0	1.78609e-05	1.83867e-05
PWY-1861: formaldehyde assimilation II (assimilatory RuMP Cycle)|g__Anaerostipes.s__Anaerostipes_hadrus	0	0	1.49137e-06	8.81475e-07
PWY-1861: formaldehyde assimilation II (assimilatory RuMP Cycle)|g__Klebsiella.s__Klebsiella_pneumoniae	0	0	1.02044e-05	1.47478e-05
PWY-1861: formaldehyde assimilation II (assimilatory RuMP Cycle)|unclassified	0	0	3.79062e-06	0
PWY-2221: Entner-Doudoroff pathway III (semi-phosphorylative)	0	0	0	6.21854e-07
PWY-241: C4 photosynthetic carbon assimilation cycle, NADP-ME type	0	0	0.000164454	0.000217926
PWY-241: C4 photosynthetic carbon assimilation cycle, NADP-ME type|unclassified	0	0	7.84528e-07	0
PWY-2723: trehalose degradation V	0	0	0.000100576	0.000160171
PWY-2723: trehalose degradation V|g__Bifidobacterium.s__Bifidobacterium_longum	0	0	4.36996e-07	4.44028e-07
PWY-2723: trehalose degradation V|g__Klebsiella.s__Klebsiella_pneumoniae	0	0	2.35784e-05	4.1017e-05
PWY-2723: trehalose degradation V|g__Klebsiella.s__Klebsiella_quasipneumoniae	0	0	4.92921e-06	7.6881e-06
PWY-2723: trehalose degradation V|g__Klebsiella.s__Klebsiella_variicola	0	0	2.83764e-06	4.33675e-06
PWY-2723: trehalose degradation V|unclassified	0	0	3.36367e-06	0
PWY-2941: L-lysine biosynthesis II	0	0	0.00021258	0.000177555
PWY-2941: L-lysine biosynthesis II|g__Bacteroides.s__Bacteroides_cellulosilyticus	0	0	2.75215e-07	5.41449e-07
PWY-2941: L-lysine biosynthesis II|g__Bacteroides.s__Bacteroides_fragilis	0	0	1.16793e-05	8.90251e-06
PWY-2941: L-lysine biosynthesis II|g__Blautia.s__Ruminococcus_torques	0	0	2.43708e-05	1.42965e-05
PWY-2941: L-lysine biosynthesis II|g__Cronobacter.s__Cronobacter_sakazakii	0	0	0	2.83295e-07
PWY-2941: L-lysine biosynthesis II|g__Flavonifractor.s__Flavonifractor_plautii	0	0	0	2.73568e-07
PWY-2941: L-lysine biosynthesis II|g__Lachnospira.s__Lachnospira_pectinoschiza	0	0	2.23367e-06	1.74628e-06
PWY-2941: L-lysine biosynthesis II|g__Lactobacillus.s__Lactobacillus_fermentum	0	0	0	3.52911e-07
PWY-2941: L-lysine biosynthesis II|g__Parabacteroides.s__Parabacteroides_distasonis	0	0	4.79859e-06	3.19478e-06
PWY-2941: L-lysine biosynthesis II|g__Streptococcus.s__Streptococcus_salivarius	0	0	5.99024e-06	7.18527e-06
PWY-2941: L-lysine biosynthesis II|unclassified	0	0	5.68528e-06	0
PWY-2942: L-lysine biosynthesis III	0	0	0.000338608	0.000312536
PWY-2942: L-lysine biosynthesis III|g__Acidaminococcus.s__Acidaminococcus_intestini	0	0	3.95762e-06	3.19214e-06
PWY-2942: L-lysine biosynthesis III|g__Actinomyces.s__Actinomyces_sp_ICM47	0	0	0	2.81376e-07
PWY-2942: L-lysine biosynthesis III|g__Adlercreutzia.s__Adlercreutzia_equolifaciens	0	0	6.82277e-08	1.76321e-07
PWY-2942: L-lysine biosynthesis III|g__Akkermansia.s__Akkermansia_muciniphila	0	0	2.00017e-06	1.27875e-06
PWY-2942: L-lysine biosynthesis III|g__Alistipes.s__Alistipes_finegoldii	0	0	1.45143e-06	1.07689e-06
PWY-2942: L-lysine biosynthesis III|g__Alistipes.s__Alistipes_shahii	0	0	9.36537e-06	6.98862e-06
PWY-2942: L-lysine biosynthesis III|g__Anaerostipes.s__Anaerostipes_hadrus	0	0	7.30882e-07	5.5467e-07
PWY-2942: L-lysine biosynthesis III|g__Asaccharobacter.s__Asaccharobacter_celatus	0	0	2.43245e-07	2.09901e-07
PWY-2942: L-lysine biosynthesis III|g__Bacteroides.s__Bacteroides_cellulosilyticus	0	0	6.38017e-07	1.32013e-06
PWY-2942: L-lysine biosynthesis III|g__Bacteroides.s__Bacteroides_dorei	0	0	5.27575e-06	5.23082e-06
PWY-2942: L-lysine biosynthesis III|g__Bacteroides.s__Bacteroides_finegoldii	0	0	1.62317e-07	5.26585e-07
PWY-2942: L-lysine biosynthesis III|g__Bacteroides.s__Bacteroides_fragilis	0	0	1.28055e-05	1.08777e-05
PWY-2942: L-lysine biosynthesis III|g__Bacteroides.s__Bacteroides_galacturonicus	0	0	3.60084e-06	2.73666e-06
PWY-2942: L-lysine biosynthesis III|g__Bacteroides.s__Bacteroides_stercoris	0	0	7.09639e-07	1.45778e-06
PWY-2942: L-lysine biosynthesis III|g__Bacteroides.s__Bacteroides_thetaiotaomicron	0	0	2.73876e-06	1.90818e-06
PWY-2942: L-lysine biosynthesis III|g__Bacteroides.s__Bacteroides_uniformis	0	0	3.56337e-06	2.4541e-06
PWY-2942: L-lysine biosynthesis III|g__Bacteroides.s__Bacteroides_vulgatus	0	0	1.03553e-05	1.2609e-05
PWY-2942: L-lysine biosynthesis III|g__Bacteroides.s__Bacteroides_xylanisolvens	0	0	1.11468e-06	1.45287e-06
PWY-2942: L-lysine biosynthesis III|g__Bifidobacterium.s__Bifidobacterium_longum	0	0	5.62716e-07	6.07182e-07
PWY-2942: L-lysine biosynthesis III|g__Bilophila.s__Bilophila_wadsworthia	0	0	2.45921e-06	1.93167e-06
PWY-2942: L-lysine biosynthesis III|g__Blautia.s__Blautia_obeum	0	0	1.21894e-05	8.00529e-06
PWY-2942: L-lysine biosynthesis III|g__Blautia.s__Blautia_wexlerae	0	0	5.81276e-06	3.66041e-06
PWY-2942: L-lysine biosynthesis III|g__Blautia.s__Ruminococcus_torques	0	0	3.60596e-05	2.15222e-05
PWY-2942: L-lysine biosynthesis III|g__Clostridium.s__Clostridium_bolteae_CAG_59	0	0	1.35534e-07	1.50868e-07
PWY-2942: L-lysine biosynthesis III|g__Coprococcus.s__Coprococcus_catus	0	0	8.85182e-07	6.98674e-07
PWY-2942: L-lysine biosynthesis III|g__Cronobacter.s__Cronobacter_sakazakii	0	0	4.07636e-07	5.92171e-07
PWY-2942: L-lysine biosynthesis III|g__Cutibacterium.s__Cutibacterium_acnes	0	0	0	7.1201e-08
PWY-2942: L-lysine biosynthesis III|g__Dialister.s__Dialister_invisus	0	0	2.42859e-06	1.99419e-06
PWY-2942: L-lysine biosynthesis III|g__Dorea.s__Dorea_formicigenerans	0	0	5.10038e-06	3.09978e-06
PWY-2942: L-lysine biosynthesis III|g__Dorea.s__Dorea_longicatena	0	0	5.25573e-06	4.9481e-06
PWY-2942: L-lysine biosynthesis III|g__Eubacterium.s__Eubacterium_hallii	0	0	1.63318e-06	1.19474e-06
PWY-2942: L-lysine biosynthesis III|g__Flavonifractor.s__Flavonifractor_plautii	0	0	4.82157e-07	2.90008e-07
PWY-2942: L-lysine biosynthesis III|g__Fusicatenibacter.s__Fusicatenibacter_saccharivorans	0	0	1.98469e-06	1.16687e-06
PWY-2942: L-lysine biosynthesis III|g__Haemophilus.s__Haemophilus_parainfluenzae	0	0	3.80768e-06	7.33661e-06
PWY-2942: L-lysine biosynthesis III|g__Haemophilus.s__Haemophilus_sputorum	0	0	0	2.07942e-07
PWY-2942: L-lysine biosynthesis III|g__Intestinimonas.s__Intestinimonas_butyriciproducens	0	0	0	2.6802e-07
PWY-2942: L-lysine biosynthesis III|g__Klebsiella.s__Klebsiella_pneumoniae	0	0	1.4001e-05	2.63229e-05
PWY-2942: L-lysine biosynthesis III|g__Klebsiella.s__Klebsiella_quasipneumoniae	0	0	1.63753e-05	2.96708e-05
PWY-2942: L-lysine biosynthesis III|g__Klebsiella.s__Klebsiella_variicola	0	0	4.04852e-06	7.51058e-06
PWY-2942: L-lysine biosynthesis III|g__Lachnoclostridium.s__Clostridium_bolteae	0	0	0	1.04849e-07
PWY-2942: L-lysine biosynthesis III|g__Lachnospira.s__Lachnospira_pectinoschiza	0	0	2.1954e-06	1.68217e-06
PWY-2942: L-lysine biosynthesis III|g__Lactobacillus.s__Lactobacillus_fermentum	0	0	0	2.85563e-07
PWY-2942: L-lysine biosynthesis III|g__Lactobacillus.s__Lactobacillus_rogosae	0	0	3.49326e-06	2.74254e-06
PWY-2942: L-lysine biosynthesis III|g__Megamonas.s__Megamonas_funiformis	0	0	2.25661e-06	1.62778e-06
PWY-2942: L-lysine biosynthesis III|g__Megamonas.s__Megamonas_funiformis_CAG_377	0	0	6.7579e-06	4.7542e-06
PWY-2942: L-lysine biosynthesis III|g__Odoribacter.s__Odoribacter_splanchnicus	0	0	1.89547e-06	1.63107e-06
PWY-2942: L-lysine biosynthesis III|g__Parabacteroides.s__Parabacteroides_distasonis	0	0	4.74169e-06	3.21297e-06
PWY-2942: L-lysine biosynthesis III|g__Parabacteroides.s__Parabacteroides_merdae	0	0	5.58825e-06	5.29841e-06
PWY-2942: L-lysine biosynthesis III|g__Parasutterella.s__Parasutterella_excrementihominis	0	0	0	2.90578e-07
PWY-2942: L-lysine biosynthesis III|g__Streptococcus.s__Streptococcus_salivarius	0	0	5.5508e-06	6.94337e-06
PWY-2942: L-lysine biosynthesis III|g__Veillonella.s__Veillonella_atypica	0	0	3.22037e-07	5.97448e-07
PWY-2942: L-lysine biosynthesis III|g__Veillonella.s__Veillonella_dispar	0	0	6.59236e-08	1.85338e-07
PWY-2942: L-lysine biosynthesis III|g__Veillonella.s__Veillonella_infantium	0	0	3.10612e-07	1.89969e-07
PWY-2942: L-lysine biosynthesis III|g__Veillonella.s__Veillonella_parvula	0	0	0	2.13008e-07
PWY-2942: L-lysine biosynthesis III|g__Veillonella.s__Veillonella_sp_T11011_6	0	0	8.81031e-08	5.37324e-08
PWY-2942: L-lysine biosynthesis III|unclassified	0	0	2.20033e-05	0
PWY-3001: superpathway of L-isoleucine biosynthesis I	0	0	0.000329926	0.000328188
PWY-3001: superpathway of L-isoleucine biosynthesis I|g__Actinomyces.s__Actinomyces_sp_ICM47	0	0	0	3.47806e-07
PWY-3001: superpathway of L-isoleucine biosynthesis I|g__Anaerostipes.s__Anaerostipes_hadrus	0	0	9.08951e-07	4.70934e-07
PWY-3001: superpathway of L-isoleucine biosynthesis I|g__Bacteroides.s__Bacteroides_cellulosilyticus	0	0	2.28625e-07	4.50631e-07
PWY-3001: superpathway of L-isoleucine biosynthesis I|g__Bacteroides.s__Bacteroides_fragilis	0	0	6.3239e-06	6.27246e-06
PWY-3001: superpathway of L-isoleucine biosynthesis I|g__Bacteroides.s__Bacteroides_stercoris	0	0	6.76946e-07	1.38843e-06
PWY-3001: superpathway of L-isoleucine biosynthesis I|g__Bifidobacterium.s__Bifidobacterium_longum	0	0	6.56943e-07	4.88599e-07
PWY-3001: superpathway of L-isoleucine biosynthesis I|g__Blautia.s__Blautia_obeum	0	0	6.51106e-06	4.81286e-06
PWY-3001: superpathway of L-isoleucine biosynthesis I|g__Blautia.s__Ruminococcus_torques	0	0	2.83836e-05	1.67826e-05
PWY-3001: superpathway of L-isoleucine biosynthesis I|g__Cronobacter.s__Cronobacter_sakazakii	0	0	0	2.9448e-07
PWY-3001: superpathway of L-isoleucine biosynthesis I|g__Eubacterium.s__Eubacterium_hallii	0	0	1.5669e-06	1.40591e-06
PWY-3001: superpathway of L-isoleucine biosynthesis I|g__Faecalibacterium.s__Faecalibacterium_prausnitzii	0	0	5.21213e-07	2.41068e-06
PWY-3001: superpathway of L-isoleucine biosynthesis I|g__Haemophilus.s__Haemophilus_parainfluenzae	0	0	2.76706e-06	5.97507e-06
PWY-3001: superpathway of L-isoleucine biosynthesis I|g__Haemophilus.s__Haemophilus_sputorum	0	0	0	4.21387e-07
PWY-3001: superpathway of L-isoleucine biosynthesis I|g__Intestinimonas.s__Intestinimonas_butyriciproducens	0	0	0	2.0179e-07
PWY-3001: superpathway of L-isoleucine biosynthesis I|g__Klebsiella.s__Klebsiella_pneumoniae	0	0	1.13399e-05	2.09471e-05
PWY-3001: superpathway of L-isoleucine biosynthesis I|g__Klebsiella.s__Klebsiella_quasipneumoniae	0	0	5.77939e-05	9.3313e-05
PWY-3001: superpathway of L-isoleucine biosynthesis I|g__Klebsiella.s__Klebsiella_variicola	0	0	8.48543e-06	1.11847e-05
PWY-3001: superpathway of L-isoleucine biosynthesis I|g__Streptococcus.s__Streptococcus_mitis	0	0	0	7.78036e-08
PWY-3001: superpathway of L-isoleucine biosynthesis I|g__Streptococcus.s__Streptococcus_parasanguinis	0	0	9.75915e-07	1.27861e-06
PWY-3001: superpathway of L-isoleucine biosynthesis I|g__Streptococcus.s__Streptococcus_salivarius	0	0	6.70766e-06	8.37001e-06
PWY-3001: superpathway of L-isoleucine biosynthesis I|g__Veillonella.s__Veillonella_atypica	0	0	6.67056e-07	7.61482e-07
PWY-3001: superpathway of L-isoleucine biosynthesis I|g__Veillonella.s__Veillonella_infantium	0	0	2.14846e-07	2.1858e-07
PWY-3001: superpathway of L-isoleucine biosynthesis I|g__Veillonella.s__Veillonella_parvula	0	0	0	2.63727e-07
PWY-3001: superpathway of L-isoleucine biosynthesis I|g__Veillonella.s__Veillonella_sp_T11011_6	0	0	6.81954e-08	2.82124e-07
PWY-3001: superpathway of L-isoleucine biosynthesis I|unclassified	0	0	1.11438e-05	0
PWY-3841: folate transformations II (plants)	0	0	0.000343683	0.000326818
PWY-3841: folate transformations II (plants)|g__Actinomyces.s__Actinomyces_sp_ICM47	0	0	0	3.01742e-07
PWY-3841: folate transformations II (plants)|g__Akkermansia.s__Akkermansia_muciniphila	0	0	1.94039e-06	1.65343e-06
PWY-3841: folate transformations II (plants)|g__Alistipes.s__Alistipes_finegoldii	0	0	2.47545e-06	1.41944e-06
PWY-3841: folate transformations II (plants)|g__Alistipes.s__Alistipes_putredinis	0	0	1.09377e-05	3.83801e-06
PWY-3841: folate transformations II (plants)|g__Anaerostipes.s__Anaerostipes_hadrus	0	0	8.45478e-07	7.50597e-07
PWY-3841: folate transformations II (plants)|g__Bacteroides.s__Bacteroides_cellulosilyticus	0	0	1.32856e-05	1.09775e-05
PWY-3841: folate transformations II (plants)|g__Bacteroides.s__Bacteroides_dorei	0	0	5.878e-06	5.27591e-06
PWY-3841: folate transformations II (plants)|g__Bacteroides.s__Bacteroides_finegoldii	0	0	3.94169e-07	6.11195e-07
PWY-3841: folate transformations II (plants)|g__Bacteroides.s__Bacteroides_fragilis	0	0	1.15678e-05	8.90911e-06
PWY-3841: folate transformations II (plants)|g__Bacteroides.s__Bacteroides_stercoris	0	0	9.3671e-07	1.87051e-06
PWY-3841: folate transformations II (plants)|g__Bacteroides.s__Bacteroides_thetaiotaomicron	0	0	3.26046e-06	3.03505e-06
PWY-3841: folate transformations II (plants)|g__Bacteroides.s__Bacteroides_uniformis	0	0	4.62628e-06	2.7347e-06
PWY-3841: folate transformations II (plants)|g__Bacteroides.s__Bacteroides_vulgatus	0	0	1.24175e-05	1.45565e-05
PWY-3841: folate transformations II (plants)|g__Bacteroides.s__Bacteroides_xylanisolvens	0	0	7.78711e-07	1.22586e-06
PWY-3841: folate transformations II (plants)|g__Bifidobacterium.s__Bifidobacterium_longum	0	0	3.04589e-07	4.70911e-07
PWY-3841: folate transformations II (plants)|g__Blautia.s__Blautia_obeum	0	0	5.05455e-06	3.04385e-06
PWY-3841: folate transformations II (plants)|g__Blautia.s__Blautia_sp_CAG_257	0	0	5.27052e-07	4.53079e-07
PWY-3841: folate transformations II (plants)|g__Blautia.s__Blautia_wexlerae	0	0	0	3.67979e-07
PWY-3841: folate transformations II (plants)|g__Blautia.s__Ruminococcus_torques	0	0	4.20505e-05	2.60516e-05
PWY-3841: folate transformations II (plants)|g__Clostridium.s__Clostridium_bolteae_CAG_59	0	0	0	4.98689e-08
PWY-3841: folate transformations II (plants)|g__Coprococcus.s__Coprococcus_catus	0	0	1.18035e-06	6.25076e-07
PWY-3841: folate transformations II (plants)|g__Cronobacter.s__Cronobacter_sakazakii	0	0	3.8208e-07	5.73119e-07
PWY-3841: folate transformations II (plants)|g__Dialister.s__Dialister_invisus	0	0	2.32283e-06	1.78604e-06
PWY-3841: folate transformations II (plants)|g__Dorea.s__Dorea_formicigenerans	0	0	4.75948e-06	3.45891e-06
PWY-3841: folate transformations II (plants)|g__Dorea.s__Dorea_longicatena	0	0	2.99507e-06	2.43403e-06
PWY-3841: folate transformations II (plants)|g__Dorea.s__Dorea_sp_CAG_317	0	0	4.64516e-07	2.41487e-07
PWY-3841: folate transformations II (plants)|g__Eubacterium.s__Eubacterium_hallii	0	0	1.82197e-06	1.12843e-06
PWY-3841: folate transformations II (plants)|g__Eubacterium.s__Eubacterium_sp_CAG_251	0	0	1.46032e-06	1.26334e-06
PWY-3841: folate transformations II (plants)|g__Flavonifractor.s__Flavonifractor_plautii	0	0	0	2.52956e-07
PWY-3841: folate transformations II (plants)|g__Haemophilus.s__Haemophilus_parahaemolyticus	0	0	0	2.69036e-08
PWY-3841: folate transformations II (plants)|g__Haemophilus.s__Haemophilus_parainfluenzae	0	0	3.0232e-06	5.64539e-06
PWY-3841: folate transformations II (plants)|g__Haemophilus.s__Haemophilus_paraphrohaemolyticus	0	0	0	2.91882e-08
PWY-3841: folate transformations II (plants)|g__Haemophilus.s__Haemophilus_sputorum	0	0	0	3.54178e-07
PWY-3841: folate transformations II (plants)|g__Intestinimonas.s__Intestinimonas_butyriciproducens	0	0	0	1.53634e-07
PWY-3841: folate transformations II (plants)|g__Klebsiella.s__Klebsiella_pneumoniae	0	0	1.51872e-05	2.41422e-05
PWY-3841: folate transformations II (plants)|g__Klebsiella.s__Klebsiella_quasipneumoniae	0	0	1.7246e-05	3.24639e-05
PWY-3841: folate transformations II (plants)|g__Klebsiella.s__Klebsiella_variicola	0	0	6.60214e-06	1.09866e-05
PWY-3841: folate transformations II (plants)|g__Lachnoclostridium.s__Clostridium_bolteae	0	0	6.81929e-08	1.15859e-07
PWY-3841: folate transformations II (plants)|g__Lachnospiraceae_unclassified.s__Eubacterium_rectale	0	0	8.66378e-07	4.82906e-07
PWY-3841: folate transformations II (plants)|g__Lactobacillus.s__Lactobacillus_fermentum	0	0	0	3.88501e-07
PWY-3841: folate transformations II (plants)|g__Lawsonibacter.s__Lawsonibacter_asaccharolyticus	0	0	0	3.59063e-07
PWY-3841: folate transformations II (plants)|g__Odoribacter.s__Odoribacter_splanchnicus	0	0	2.01751e-06	1.47893e-06
PWY-3841: folate transformations II (plants)|g__Parabacteroides.s__Parabacteroides_distasonis	0	0	3.89198e-06	2.65885e-06
PWY-3841: folate transformations II (plants)|g__Parabacteroides.s__Parabacteroides_merdae	0	0	4.938e-06	4.22322e-06
PWY-3841: folate transformations II (plants)|g__Parasutterella.s__Parasutterella_excrementihominis	0	0	4.13931e-07	3.82301e-07
PWY-3841: folate transformations II (plants)|g__Roseburia.s__Roseburia_faecis	0	0	9.29577e-06	4.67838e-06
PWY-3841: folate transformations II (plants)|g__Roseburia.s__Roseburia_hominis	0	0	0	1.04534e-07
PWY-3841: folate transformations II (plants)|g__Roseburia.s__Roseburia_inulinivorans	0	0	0	2.46443e-07
PWY-3841: folate transformations II (plants)|g__Streptococcus.s__Streptococcus_mitis	0	0	0	7.52192e-08
PWY-3841: folate transformations II (plants)|g__Streptococcus.s__Streptococcus_parasanguinis	0	0	8.82391e-07	1.15032e-06
PWY-3841: folate transformations II (plants)|g__Streptococcus.s__Streptococcus_salivarius	0	0	4.95777e-06	5.99768e-06
PWY-3841: folate transformations II (plants)|g__Veillonella.s__Veillonella_atypica	0	0	8.50726e-07	8.42254e-07
PWY-3841: folate transformations II (plants)|g__Veillonella.s__Veillonella_dispar	0	0	4.30488e-07	4.98832e-07
PWY-3841: folate transformations II (plants)|g__Veillonella.s__Veillonella_infantium	0	0	0	1.29815e-07
PWY-3841: folate transformations II (plants)|g__Veillonella.s__Veillonella_parvula	0	0	0	2.99766e-07
PWY-3841: folate transformations II (plants)|g__Veillonella.s__Veillonella_sp_T11011_6	0	0	0	1.01203e-07
PWY-3841: folate transformations II (plants)|unclassified	0	0	2.52946e-05	0
PWY-4041: &gamma;-glutamyl cycle	0	0	0.000188815	0.000264495
PWY-4041: &gamma;-glutamyl cycle|g__Bacteroides.s__Bacteroides_dorei	0	0	3.95913e-06	4.07913e-06
PWY-4041: &gamma;-glutamyl cycle|g__Bacteroides.s__Bacteroides_fragilis	0	0	1.12777e-06	9.95705e-07
PWY-4041: &gamma;-glutamyl cycle|g__Bacteroides.s__Bacteroides_thetaiotaomicron	0	0	2.2656e-06	1.77077e-06
PWY-4041: &gamma;-glutamyl cycle|g__Bifidobacterium.s__Bifidobacterium_longum	0	0	4.22617e-07	3.93144e-07
PWY-4041: &gamma;-glutamyl cycle|g__Cronobacter.s__Cronobacter_sakazakii	0	0	0	5.27398e-07
PWY-4041: &gamma;-glutamyl cycle|g__Haemophilus.s__Haemophilus_parainfluenzae	0	0	4.61173e-06	9.48958e-06
PWY-4041: &gamma;-glutamyl cycle|g__Klebsiella.s__Klebsiella_pneumoniae	0	0	5.77871e-05	0.000102726
PWY-4041: &gamma;-glutamyl cycle|g__Klebsiella.s__Klebsiella_quasipneumoniae	0	0	2.63508e-05	5.29964e-05
PWY-4041: &gamma;-glutamyl cycle|g__Klebsiella.s__Klebsiella_variicola	0	0	8.48782e-06	1.60517e-05
PWY-4041: &gamma;-glutamyl cycle|g__Streptococcus.s__Streptococcus_parasanguinis	0	0	9.59782e-07	9.55391e-07
PWY-4041: &gamma;-glutamyl cycle|g__Streptococcus.s__Streptococcus_salivarius	0	0	2.62895e-06	3.61715e-06
PWY-4041: &gamma;-glutamyl cycle|unclassified	0	0	7.29865e-07	0
PWY-4242	0	0	0.00032318	0.000274939
PWY-4242|g__Acidaminococcus.s__Acidaminococcus_intestini	0	0	3.59606e-06	3.12663e-06
PWY-4242|g__Actinomyces.s__Actinomyces_sp_ICM47	0	0	0	1.07125e-07
PWY-4242|g__Agathobaculum.s__Agathobaculum_butyriciproducens	0	0	1.48146e-06	1.24651e-06
PWY-4242|g__Alistipes.s__Alistipes_finegoldii	0	0	2.55989e-06	1.65961e-06
PWY-4242|g__Alistipes.s__Alistipes_putredinis	0	0	1.0887e-05	3.52357e-06
PWY-4242|g__Anaerostipes.s__Anaerostipes_hadrus	0	0	1.11603e-06	5.73671e-07
PWY-4242|g__Bacteroides.s__Bacteroides_cellulosilyticus	0	0	1.16304e-05	8.17299e-06
PWY-4242|g__Bacteroides.s__Bacteroides_dorei	0	0	5.50196e-06	5.42367e-06
PWY-4242|g__Bacteroides.s__Bacteroides_finegoldii	0	0	3.33066e-07	3.69586e-07
PWY-4242|g__Bacteroides.s__Bacteroides_fragilis	0	0	9.9793e-06	6.66766e-06
PWY-4242|g__Bacteroides.s__Bacteroides_galacturonicus	0	0	2.70524e-06	2.09036e-06
PWY-4242|g__Bacteroides.s__Bacteroides_stercoris	0	0	8.5959e-07	1.21636e-06
PWY-4242|g__Bacteroides.s__Bacteroides_thetaiotaomicron	0	0	2.50871e-06	2.57428e-06
PWY-4242|g__Bacteroides.s__Bacteroides_uniformis	0	0	2.1718e-06	1.90532e-06
PWY-4242|g__Bacteroides.s__Bacteroides_vulgatus	0	0	1.14207e-05	1.26416e-05
PWY-4242|g__Bacteroides.s__Bacteroides_xylanisolvens	0	0	1.05696e-06	1.27163e-06
PWY-4242|g__Bilophila.s__Bilophila_wadsworthia	0	0	2.52686e-06	1.57083e-06
PWY-4242|g__Blautia.s__Blautia_obeum	0	0	9.89595e-06	6.29935e-06
PWY-4242|g__Blautia.s__Blautia_sp_CAG_257	0	0	3.77156e-07	3.03249e-07
PWY-4242|g__Blautia.s__Ruminococcus_torques	0	0	3.84726e-05	2.35115e-05
PWY-4242|g__Clostridium.s__Clostridium_sp_CAG_58	0	0	0	3.5582e-07
PWY-4242|g__Collinsella.s__Collinsella_aerofaciens	0	0	1.95437e-06	1.53928e-06
PWY-4242|g__Cronobacter.s__Cronobacter_sakazakii	0	0	0	2.21758e-07
PWY-4242|g__Dialister.s__Dialister_invisus	0	0	1.76623e-06	1.41594e-06
PWY-4242|g__Dorea.s__Dorea_formicigenerans	0	0	4.17115e-06	3.32355e-06
PWY-4242|g__Dorea.s__Dorea_longicatena	0	0	2.20175e-06	2.0565e-06
PWY-4242|g__Eubacterium.s__Eubacterium_hallii	0	0	5.16515e-07	7.57362e-07
PWY-4242|g__Eubacterium.s__Eubacterium_ramulus	0	0	0	4.68025e-07
PWY-4242|g__Eubacterium.s__Eubacterium_sp_CAG_274	0	0	2.05357e-06	1.51807e-06
PWY-4242|g__Faecalibacterium.s__Faecalibacterium_prausnitzii	0	0	1.37054e-05	1.54524e-05
PWY-4242|g__Flavonifractor.s__Flavonifractor_plautii	0	0	5.89741e-07	3.68313e-07
PWY-4242|g__Fusicatenibacter.s__Fusicatenibacter_saccharivorans	0	0	1.44627e-06	1.07267e-06
PWY-4242|g__Gemmiger.s__Gemmiger_formicilis	0	0	2.21479e-06	1.86627e-06
PWY-4242|g__Haemophilus.s__Haemophilus_parainfluenzae	0	0	3.22848e-06	6.39643e-06
PWY-4242|g__Haemophilus.s__Haemophilus_sputorum	0	0	0	2.42786e-07
PWY-4242|g__Intestinimonas.s__Intestinimonas_butyriciproducens	0	0	0	1.58221e-07
PWY-4242|g__Klebsiella.s__Klebsiella_pneumoniae	0	0	3.86319e-06	7.69971e-06
PWY-4242|g__Klebsiella.s__Klebsiella_quasipneumoniae	0	0	1.84322e-05	2.61642e-05
PWY-4242|g__Klebsiella.s__Klebsiella_variicola	0	0	2.30589e-06	4.45986e-06
PWY-4242|g__Lachnoclostridium.s__Clostridium_bolteae	0	0	0	4.80333e-08
PWY-4242|g__Lachnospira.s__Lachnospira_pectinoschiza	0	0	2.31116e-06	1.73937e-06
PWY-4242|g__Lachnospiraceae_unclassified.s__Eubacterium_rectale	0	0	5.16375e-06	2.94751e-06
PWY-4242|g__Lactobacillus.s__Lactobacillus_fermentum	0	0	0	2.40674e-07
PWY-4242|g__Lactobacillus.s__Lactobacillus_rogosae	0	0	2.32263e-06	1.88199e-06
PWY-4242|g__Lawsonibacter.s__Lawsonibacter_asaccharolyticus	0	0	0	1.84172e-07
PWY-4242|g__Megasphaera.s__Megasphaera_sp_DISK_18	0	0	2.94441e-06	1.97414e-06
PWY-4242|g__Odoribacter.s__Odoribacter_splanchnicus	0	0	1.36221e-06	1.58861e-06
PWY-4242|g__Parabacteroides.s__Parabacteroides_distasonis	0	0	3.25633e-06	1.72725e-06
PWY-4242|g__Parabacteroides.s__Parabacteroides_merdae	0	0	3.59484e-06	3.84518e-06
PWY-4242|g__Phascolarctobacterium.s__Phascolarctobacterium_faecium	0	0	5.5647e-06	4.19363e-06
PWY-4242|g__Roseburia.s__Roseburia_faecis	0	0	9.54455e-06	4.99329e-06
PWY-4242|g__Roseburia.s__Roseburia_hominis	0	0	0	7.25443e-08
PWY-4242|g__Ruminococcus.s__Ruminococcus_callidus	0	0	2.67528e-06	1.24226e-07
PWY-4242|g__Streptococcus.s__Streptococcus_parasanguinis	0	0	5.5081e-07	1.0301e-06
PWY-4242|g__Streptococcus.s__Streptococcus_salivarius	0	0	3.76923e-06	3.10264e-06
PWY-4242|g__Veillonella.s__Veillonella_atypica	0	0	3.54013e-07	7.29028e-07
PWY-4242|g__Veillonella.s__Veillonella_dispar	0	0	0	4.41746e-07
PWY-4242|g__Veillonella.s__Veillonella_parvula	0	0	0	2.74307e-07
PWY-4242|unclassified	0	0	2.20651e-05	0
PWY-4321: L-glutamate degradation IV	0	0	8.19194e-07	6.62282e-06
PWY-4702: phytate degradation I	0	0	0	3.85139e-07
PWY-4702: phytate degradation I|g__Cronobacter.s__Cronobacter_sakazakii	0	0	0	2.61698e-07
PWY-4722: creatinine degradation II	0	0	5.21947e-07	3.81388e-07
PWY-4981: L-proline biosynthesis II (from arginine)	0	0	2.49176e-05	1.84018e-05
PWY-4981: L-proline biosynthesis II (from arginine)|g__Adlercreutzia.s__Adlercreutzia_equolifaciens	0	0	1.11139e-06	3.89611e-07
PWY-4981: L-proline biosynthesis II (from arginine)|g__Asaccharobacter.s__Asaccharobacter_celatus	0	0	5.31336e-07	1.64694e-07
PWY-4981: L-proline biosynthesis II (from arginine)|g__Collinsella.s__Collinsella_aerofaciens	0	0	5.36946e-06	3.38733e-06
PWY-4981: L-proline biosynthesis II (from arginine)|g__Cronobacter.s__Cronobacter_sakazakii	0	0	0	6.95432e-07
PWY-4981: L-proline biosynthesis II (from arginine)|g__Dorea.s__Dorea_longicatena	0	0	0	1.55945e-07
PWY-4981: L-proline biosynthesis II (from arginine)|g__Eubacterium.s__Eubacterium_ramulus	0	0	0	3.70335e-07
PWY-4981: L-proline biosynthesis II (from arginine)|g__Gordonibacter.s__Gordonibacter_pamelaeae	0	0	0	3.53525e-08
PWY-4981: L-proline biosynthesis II (from arginine)|g__Lachnoclostridium.s__Clostridium_asparagiforme	0	0	0	6.09608e-08
PWY-4981: L-proline biosynthesis II (from arginine)|g__Streptococcus.s__Streptococcus_parasanguinis	0	0	1.00508e-06	8.89035e-07
PWY-4981: L-proline biosynthesis II (from arginine)|g__Streptococcus.s__Streptococcus_salivarius	0	0	0	4.14358e-08
PWY-4981: L-proline biosynthesis II (from arginine)|unclassified	0	0	4.13542e-06	0
PWY-4984: urea cycle	0	0	9.66487e-05	9.64651e-05
PWY-4984: urea cycle|g__Alistipes.s__Alistipes_finegoldii	0	0	2.14327e-06	1.53266e-06
PWY-4984: urea cycle|g__Coprococcus.s__Coprococcus_catus	0	0	1.34951e-06	5.38986e-07
PWY-4984: urea cycle|g__Flavonifractor.s__Flavonifractor_plautii	0	0	0	4.14868e-07
PWY-4984: urea cycle|g__Klebsiella.s__Klebsiella_pneumoniae	0	0	1.62002e-06	4.60789e-06
[truncated: 3,525 more rows]

## Sheet: CT18_Top5000Genes
	C1	C2	HD1	HD2
UniRef90_A0A069SSF1	0	0.098104	0.000206706	0.000303548
UniRef90_A5ZYV3	0	0.049052	0.0033318	0.00272318
UniRef90_A8SH99	0	0.049052	0.000241622	0.000236916
UniRef90_A5ZX03	0	0.049052	4.27056e-05	4.23754e-05
UniRef90_D1JJD8	0.026544	0	4.9823e-05	8.85528e-05
UniRef90_G2T525	0.023226	0	8.30476e-06	2.76556e-05
UniRef90_C4ZFG5	0.019908	0	0.00155401	0.00147405
UniRef90_A0A0E2TII2	0	0.0205292	0.000227406	0.00015713
UniRef90_A0A015RT73	0.019908	0	0.000434172	0.000315612
UniRef90_C4ZER8	0	0.0163507	0.000678092	0.00057186
UniRef90_A0A223UIZ1	0	0.0163507	0.000139369	0.000267062
UniRef90_A0A015S1R6	0.0159264	0	5.64455e-05	6.73068e-05
UniRef90_A8SBT0	0.0159264	0	8.36316e-05	3.43364e-05
UniRef90_A0A1Y4PFI7	0.013272	0	0.00028837	0.000246892
UniRef90_R7D568	0.013272	0	2.19747e-05	9.40414e-06
UniRef90_A7ACY4	0	0.0098104	0.000122778	7.4634e-05
UniRef90_B0MU05	0.009954	0	2.43554e-05	1.17558e-05
UniRef90_A0A396CLY0	0.00814418	0	0.000941322	0.000885596
UniRef90_I8ZKD3	0	0.0098104	4.32394e-05	2.00354e-05
UniRef90_D1JPJ2	0.008848	0	5.79128e-05	4.23924e-05
UniRef90_B5Y280	0	0.00817532	0.00021849	0.000288212
UniRef90_A0A380YN89	0	0.00817532	0.000111883	0.000112825
UniRef90_A0A377ZHU5	0	0.00700742	0.000112314	0.000185955
UniRef90_A5KMX5	0	0.00664784	0.0001634	7.75152e-05
UniRef90_A0A0E2TFF8	0	0.00545022	0.000101557	7.03162e-05
UniRef90_A0A377TMD7	0	0.00545022	5.18572e-05	8.38728e-05
UniRef90_A5ZYU0	0.00351996	0.00109004	0.000542996	0.000424262
UniRef90_E2ZLQ0	0	0.00545022	5.40162e-05	4.91128e-05
UniRef90_A8SCT4	0.004977	0	2.97414e-05	2.50938e-05
UniRef90_D4CI30	0	0.00467162	0.000185855	0.000142813
UniRef90_C0FN20	0.00468424	0	0.000123271	9.04694e-05
UniRef90_A0A377ZGA9	0	0.00437964	8.76328e-06	1.44236e-05
UniRef90_W1E9I8	0	0.00408766	0.000117935	0.000188783
UniRef90_A0A0E1X896	0.00139705	0.00086056	0.00113662	0.000890456
UniRef90_A0A3E5IAT7	0	0.00408766	0.000123648	7.31908e-05
UniRef90_A0A0E2H2C3	0	0.0040098	0.000105702	6.85868e-05
UniRef90_H3K7E2	0	0.00408766	1.7491e-05	2.27034e-05
UniRef90_F9Z9W9	0	0.00408766	8.7601e-06	6.6914e-06
UniRef90_A0A2H9FAI8	0.00312282	0	0.000332332	0.000615748
UniRef90_W1H4W3	0.00361964	0	0.000103512	0.000218402
UniRef90_C7H8E5	0	0.00377322	6.02452e-05	6.92162e-05
UniRef90_V0AWQ4	0	0.00350372	9.29886e-05	0.0002427
UniRef90_A0A377BE54	0	0	0.00131257	0.00244858
UniRef90_A0A0M1VYK8	0.00361964	0	0.000106764	1.08087e-05
UniRef90_A5KRL1	0.000983112	0.00181674	0.000573367	0.000340724
UniRef90_A5ZU79	0.00361964	0	2.51526e-05	1.07354e-05
UniRef90_A8S7P6	0	0.00350372	7.62598e-06	8.18282e-06
UniRef90_I8WEJ0	0.003318	0	0.000111183	7.0191e-05
UniRef90_A0A0P0LMZ4	0	0.00340638	2.1916e-05	2.28254e-05
UniRef90_A0A395VRV3	0.0008295	0.00102192	0.00081686	0.000761869
UniRef90_D1JRR8	0	0.00327014	9.55916e-05	6.36386e-05
UniRef90_W1H3A6	0	0	0.0012252	0.0021834
UniRef90_A0A1H3IAC0	0.003318	0	5.13006e-05	3.21166e-05
UniRef90_C7H8Y5	0	0.0033829	7.89096e-06	8.42532e-06
UniRef90_D1JQJ5	0	0.00327014	7.68058e-05	4.85504e-05
UniRef90_H3K513	0.003318	0	3.73674e-05	2.71454e-05
UniRef90_C7H172	0.00323994	0	4.83106e-05	4.76362e-05
UniRef90_A7AAC1	0.003318	0	9.60874e-06	5.55838e-06
UniRef90_A0A2H9EGX0	0	0.00188661	0.000501054	0.000935544
UniRef90_A0A174VXP4	0	0.00327014	1.70822e-05	1.94184e-05
UniRef90_R6BPP3	0	0.00327014	1.30135e-05	7.57246e-06
UniRef90_A0A078QYW1	0.00306278	0	7.95094e-05	9.41912e-05
UniRef90_T4BXP0	0.001659	0	0.000872644	0.000698244
UniRef90_A0A139KAE2	0.00306278	0	8.6682e-05	5.33544e-05
UniRef90_A0A0E2T267	0	0.00311442	3.25414e-05	2.4852e-05
UniRef90_A0A0K6BWK1	0.00306278	0	4.82018e-05	5.79106e-05
UniRef90_D4V502	0	0.00288542	2.9442e-05	9.73443e-06
UniRef90_C9KZX3	0	0	0.00152356	0.00139362
UniRef90_A7B5X2	0.000698527	0.00086056	0.000747164	0.000569956
UniRef90_A8SCM4	0.002844	0	3.0504e-06	8.68074e-06
UniRef90_A0A173VT11	0	0	0.00173066	0.00109447
UniRef90_W1E5S9	0	0	0.00109912	0.00172242
UniRef90_D1JWS8	0	0	0.00161654	0.00117439
UniRef90_Q9L782	0	0.00248404	0.000180887	0.000118191
UniRef90_A0A1S9BP47	0	0	0.00094279	0.00183044
UniRef90_A0A2A6ZTF9	0.00264352	0	6.006e-05	5.9753e-05
UniRef90_A5KM11	0.0026544	0	4.42404e-05	1.97868e-05
UniRef90_V0AQ90	0	0	0.000935962	0.00177793
UniRef90_A0A380YR91	0	0.00265146	1.94043e-05	1.77852e-05
UniRef90_D4IMU8	0.0026544	0	2.16132e-05	7.41046e-06
UniRef90_T4BVE4	0.000780707	0.000480902	0.000772926	0.000599358
UniRef90_U2Z4S8	0	0.0023358	0.00013934	0.000145112
UniRef90_V0AJG3	0	0	0.000856564	0.00171931
UniRef90_A0A3E5E271	0.00204184	0	0.000293928	0.000223438
UniRef90_UPI000BE72FFF	0	0.0023358	7.39666e-05	0.000137599
UniRef90_A0A139TGK6	0.00234212	0	0.000110997	5.51212e-05
UniRef90_A0A139SYT8	0	0.0023358	7.73046e-05	6.05726e-05
UniRef90_C7XFT8	0.0024131	0	8.41288e-06	1.28203e-05
UniRef90_T5M0R5	0	0.0023358	2.58592e-05	1.74299e-05
UniRef90_A0A372HUI4	0	0.00204384	0.000113576	0.00020229
UniRef90_A0A174QSW1	0.000714435	0.000714579	0.000513009	0.000406324
UniRef90_E5XHG8	0.002212	0	7.48804e-05	4.94118e-05
UniRef90_A0A351EH07	0	0.00231742	5.22244e-07	0
UniRef90_R5VCD1	0	0.00225366	1.28702e-05	7.85886e-06
UniRef90_E4VQP0	0.002212	0	2.4718e-05	2.34542e-05
UniRef90_A0A1V3YHG0	0	0.0021327	1.97414e-05	2.30182e-05
UniRef90_F7LS08	0.00185191	0	0.000175757	0.000137237
UniRef90_A0A173XT59	0.00137061	0	0.000419123	0.00035226
UniRef90_A0A073IPI0	0.00209558	0	3.37148e-05	9.89584e-06
UniRef90_D1JR25	0	0.00204384	4.6072e-05	3.38406e-05
UniRef90_A0A396E459	0	0.0019819	8.14668e-05	5.97096e-05
UniRef90_R6QQM4	0	0.00210976	1.6072e-06	2.01986e-06
UniRef90_A0A015XB32	0	0.00209386	3.25264e-06	3.26808e-06
UniRef90_A0A2Z6EJ64	0	0.00181674	7.15678e-05	0.000127227
UniRef90_A0A069SEW2	0.0019908	0	1.22855e-05	1.16481e-05
UniRef90_V8M0W9	0	0	0.000968446	0.00103447
UniRef90_A0A174PEP1	0.001896	0	5.97712e-05	4.22102e-05
UniRef90_W1I8Q3	0.000709292	0.000514118	0.000395238	0.000375714
UniRef90_A0A174BIQ0	0	0.00192361	4.29202e-05	2.23862e-05
UniRef90_UPI000C7AC072	0	0.00192361	1.42637e-05	3.73168e-05
UniRef90_D1PNI3	0.00194225	0	8.5411e-06	1.06203e-05
UniRef90_C0FV95	0	0.00192361	2.24596e-05	1.4174e-05
UniRef90_D1JPZ0	0.001896	0	3.26574e-05	2.90982e-05
UniRef90_A0A331HUD3	0.00180982	0	4.48802e-05	0.000102307
UniRef90_D1NCQ8	0	0.00194587	0	0
UniRef90_B0NNU5	0.001659	0	0.000148734	0.000133258
UniRef90_A0A1Y3ZVE2	0.001896	0	1.92221e-05	2.09524e-05
UniRef90_A7VFF8	0	0.00188661	1.65803e-05	1.57879e-05
UniRef90_A0A3E2UG38	0.001896	0	6.87948e-06	8.55351e-06
UniRef90_A0A078QBC9	0.001896	0	4.0672e-06	5.46546e-06
UniRef90_C0FQ82	0.001659	0	0.000151035	9.27684e-05
UniRef90_J2X949	0	0	0.000750534	0.00115079
UniRef90_A0A0M6WRX6	0.001896	0	0	1.27792e-06
UniRef90_C3R328	0	0.00181674	3.47858e-05	3.91048e-05
UniRef90_K1G609	0.00180982	0	3.04892e-05	2.40434e-05
UniRef90_E5XJB1	0	0.00144271	0.000209834	0.000160871
UniRef90_A0A0E1CPF0	0	0	0.000590426	0.0012165
UniRef90_A0A2D1H472	0	0	0.000665906	0.00113674
UniRef90_UPI000CF4EFF9	0	0.00178371	2.3087e-06	2.73944e-06
UniRef90_W1H2G1	0	0	0.00074339	0.00104446
UniRef90_A0A376FDX6	0.00177954	0	1.66344e-06	7.17512e-07
UniRef90_A0A377WG26	0	0	0.000609732	0.00116913
UniRef90_R4Y7L9	0.00156141	0	9.20348e-05	0.000113893
UniRef90_A7AJP8	0	0	0.000965768	0.000800636
UniRef90_A0A2N5A468	0.001659	0	3.90756e-05	5.87008e-05
UniRef90_Q8A276	0.0007584	0.000925508	4.434e-05	2.38512e-05
UniRef90_A0A3E4X7P0	0	0.00172112	1.38541e-05	1.41773e-05
UniRef90_A0A1S8YH30	0	0	0.00059579	0.00114784
UniRef90_A7B6K2	0.00106535	0	0.00037567	0.00029414
UniRef90_A0A015TQW5	0	0.00167699	3.51284e-05	2.0247e-05
UniRef90_C6JEC3	0	0.00172112	6.10026e-06	4.6865e-06
UniRef90_F3PSP1	0.000896799	0	0.00043327	0.00040042
UniRef90_A0A2X1Q2L8	0.001659	0	1.53428e-05	5.04178e-05
UniRef90_A0A174CCH8	0.00172289	0	9.34538e-07	9.22739e-07
UniRef90_V0AZN9	0	0	0.000474108	0.00121777
UniRef90_A0A377TXW1	0.000237	0.0014218	1.01511e-05	1.99674e-05
UniRef90_A0A378NRW6	0.001659	0	8.86126e-06	6.30212e-06
UniRef90_R6QRL5	0.001659	0	2.6691e-06	3.21756e-06
UniRef90_C7HB33	0.00157703	0	4.88832e-05	3.8248e-05
UniRef90_A0A3E5EJF8	0	0.00148642	0.000105368	6.62546e-05
UniRef90_W1GWF2	0	0	0.000511846	0.00113598
UniRef90_A0A2A7B6Z6	0	0.00163507	4.52782e-06	7.23868e-06
UniRef90_G2T1W9	0	0.00163507	0	0
UniRef90_A0A396EN35	0.00156141	0	4.1364e-05	2.42498e-05
UniRef90_A0A1S8Y8P5	0	0	0.000642119	0.000976966
UniRef90_A0A395VRY1	0	0.00136255	0.000140889	0.000107812
UniRef90_C0BCA8	0.00147467	0	7.84148e-05	5.30132e-05
UniRef90_A0A2X3HJE6	0	0	0.000624222	0.000978546
UniRef90_A6BEY1	0	0.00153287	4.06485e-05	2.92438e-05
UniRef90_A0A3A3WGK9	0	0.00148642	4.01016e-05	7.1761e-05
UniRef90_R6J3W6	0.00153139	0	4.82186e-05	1.85846e-05
UniRef90_A0A0M6WIY6	0	0.00155721	1.45695e-05	7.50768e-06
UniRef90_A0A396EZ97	0.001264	0	0.000177107	0.000130408
UniRef90_C7H3G4	0	0.00153287	2.32568e-05	1.53438e-05
UniRef90_C7HA35	0	0.00153287	1.79797e-05	1.61587e-05
UniRef90_A0A3E5ASQ8	0.00147467	0	4.60978e-05	3.75459e-05
UniRef90_D1JWT5	0	0	0.000846746	0.00070383
UniRef90_A5KLS8	0.00147467	0	3.32608e-05	2.49686e-05
UniRef90_A0A174RLF6	0	0.00152099	3.78984e-06	4.68076e-06
UniRef90_A0A378DKC4	0	0.00148642	1.06302e-05	2.52314e-05
UniRef90_E4W393	0	0	0.00092086	0.000600446
UniRef90_A0A395VQC8	0	0.00137818	7.84298e-05	6.3929e-05
UniRef90_G2T381	0.00147467	0	2.44596e-05	2.13974e-05
UniRef90_J2X963	0	0	0.000581694	0.000933726
UniRef90_D1PJV1	0	0.00148642	1.70165e-05	9.58721e-06
UniRef90_A0A377ZGF6	0	0.00148642	1.27582e-05	1.33005e-05
UniRef90_A0A395VR93	0.00138663	0	7.05633e-05	5.44412e-05
UniRef90_V0B0Q1	0	0	0.000536784	0.000972022
UniRef90_F0ES12	0	0.00148642	4.86286e-06	9.03768e-06
UniRef90_D7IP01	0.00146635	0	1.35601e-05	1.37854e-05
UniRef90_D4JBI5	0	0.00136255	7.4395e-05	5.09252e-05
UniRef90_D1JSH4	0.001422	0	4.2485e-05	2.02554e-05
UniRef90_A8SSN6	0.000294934	0.000726696	0.00027154	0.000189214
UniRef90_A0A174FDD4	0.00145295	0	1.78561e-05	9.71058e-06
UniRef90_A5ZYK6	0.000551094	0.000340638	0.000347144	0.000236246
UniRef90_C4ZFJ3	0.0013272	0	8.3426e-05	5.9018e-05
UniRef90_A5ZTV7	0.00106176	0	0.000243106	0.000161793
UniRef90_A0A3E2W8H8	0.0013272	0	8.12184e-05	5.73802e-05
UniRef90_A0A078SS40	0.000272712	0.00102192	8.98725e-05	6.82992e-05
UniRef90_A0A174WR75	0	0.0014218	1.04573e-05	1.81805e-05
UniRef90_A0A2L0KNP8	0.00136275	0	2.57304e-05	5.37658e-05
UniRef90_UPI000C21EB34	0.00118854	0	9.18398e-05	0.000160881
UniRef90_A5KLE7	0.00139705	0	2.78292e-05	1.41741e-05
UniRef90_C7H9E0	0.0013272	0	5.28653e-05	5.43716e-05
UniRef90_D4L151	0.0013272	0	6.54128e-05	3.61792e-05
UniRef90_R5RFM2	0	0.00139155	2.00256e-05	1.57359e-05
UniRef90_D4JYS9	0	0.00139155	1.83982e-05	1.54634e-05
UniRef90_V0AHH7	0	0	0.000561268	0.000853352
UniRef90_A0A0K6BWL2	0.00137297	0	2.12145e-05	1.79216e-05
UniRef90_E2SRB6	0	0.00102192	0.00022315	0.00015545
UniRef90_B0PBV1	0.0010358	0	0.000199933	0.000163023
UniRef90_A0A2X3F938	0	0.00136255	1.47181e-05	2.14236e-05
UniRef90_A0A396F210	0	0.00136255	2.0304e-05	1.38555e-05
UniRef90_A7V4G2	0	0	0.000754	0.000638066
UniRef90_E1Z1Q2	0	0.00138175	5.37156e-06	2.81552e-06
UniRef90_A0A173UIK9	0.0013272	0	3.1657e-05	3.03488e-05
UniRef90_J2X998	0	0	0.00046631	0.000922876
UniRef90_I9IGS0	0	0	0.000699724	0.000679146
UniRef90_A0A173Z1P9	0.0013272	0	2.4975e-05	2.29082e-05
UniRef90_A0A1M3S116	0	0.00129084	2.84622e-05	5.48672e-05
UniRef90_B0G8N9	0.000983112	0	0.00023677	0.000151389
UniRef90_E1YUH9	0	0.00136255	5.33818e-06	2.69898e-06
UniRef90_A0A2X3EUW6	0.00136318	0	0	0
UniRef90_A0A395ZZV8	0	0.00125774	6.26208e-05	3.52824e-05
UniRef90_A8S6E9	0	0.000961804	0.000210448	0.000180681
UniRef90_A0A2X5BR47	0	0.0011679	6.54608e-05	0.000118697
UniRef90_A0A2G5AP77	0.0013272	0	4.5052e-06	1.5537e-05
UniRef90_A0A2A7AZV2	0.0013272	0	1.20769e-05	6.27078e-06
UniRef90_A0A2A7A4D0	0.00127411	0	2.99396e-05	3.3263e-05
UniRef90_V0B6Y6	0	0	0.000363206	0.00097299
UniRef90_J7QIY4	0	0.000943308	0.000163664	0.000226666
UniRef90_A0A3E2TXV0	0.0013272	0	3.79604e-06	1.4773e-06
UniRef90_B7CD96	0	0.00130805	1.23133e-05	1.00319e-05
UniRef90_A0A1S8YEK4	0	0	0.000594052	0.000731256
UniRef90_A5ZTH6	0	0.00129084	1.42352e-05	1.88049e-05
UniRef90_C6ZBE6	0	0.00129945	1.20698e-05	7.80863e-06
UniRef90_A0A2A7ALI5	0.00124425	0	3.69002e-05	3.69926e-05
UniRef90_A0A395VLH5	0	0.00130805	4.73622e-06	4.60058e-06
UniRef90_A0A0K6BSG1	0	0.0012824	1.93808e-05	1.55058e-05
UniRef90_A6KWD7	0.00122511	0	4.29788e-05	4.18482e-05
UniRef90_A0A1S8YHP9	0	0	0.000437876	0.000868708
UniRef90_A0A078S9T0	0.00120655	0	5.5963e-05	4.30552e-05
UniRef90_A0A173UK39	0	0.00125774	2.43978e-05	1.65118e-05
UniRef90_A0A3E2XW44	0.00127411	0	1.07419e-05	7.12908e-06
UniRef90_A0A2Z3FK50	0	0.00109004	7.23118e-05	0.000125915
UniRef90_D4LZX5	0	0	0.00073586	0.000548968
UniRef90_A0A0K2HKG2	0.00127615	0	3.4085e-06	4.99952e-06
UniRef90_A0A0M6WSR3	0	0.00125774	1.73819e-05	6.85602e-06
UniRef90_A0A173UDZ0	0.00127752	0	1.90397e-06	6.6862e-07
UniRef90_A5Z326	0.00102092	0	0.0001531	0.000105631
UniRef90_A5KRI2	0.000617302	0	0.000381056	0.000272052
UniRef90_A0A2U0KPN6	0	0.00114074	4.33206e-05	8.58342e-05
UniRef90_C4Z9A0	0.000856258	0	0.000240578	0.0001461
UniRef90_A0A174Y5A8	0	0.00121116	5.68018e-06	4.54964e-06
UniRef90_A0A396DXA9	0	0.00112763	4.30502e-05	4.05286e-05
UniRef90_A0A2P2F5X9	0.000948	0	0.000135908	0.000121521
UniRef90_D1JU05	0	0.0011679	1.88558e-05	1.32974e-05
UniRef90_A0A3E2XTM8	0.001008	0	0.000105658	7.05626e-05
UniRef90_A0A139JVI0	0	0.0011679	9.23516e-06	6.7737e-06
UniRef90_A0A3E2T887	0.001106	0	3.9175e-05	3.59432e-05
UniRef90_R6EPT0	0.00104094	0	7.77779e-05	5.425e-05
UniRef90_A0A0M6WRZ8	0.00115409	0	9.2942e-06	5.55408e-06
UniRef90_J2E015	0	0	0.00040766	0.000760214
UniRef90_A0A174SI18	0	0.00114247	1.02644e-05	5.19918e-06
UniRef90_A0A2L0KEY6	0	0.00105488	3.493e-05	6.69732e-05
UniRef90_A0A016CJU8	0	0.00109004	3.32414e-05	3.08888e-05
UniRef90_A6BKY7	0	0	0.00068229	0.000466168
UniRef90_A0A015VTS6	0	0.00109004	3.3786e-05	2.39012e-05
UniRef90_E5UNE8	0.00110792	0	2.31282e-05	1.52947e-05
UniRef90_A0A378ASH3	0	0	0.000321144	0.00082308
UniRef90_A0A174S5G8	0.001106	0	2.07406e-05	1.00315e-05
UniRef90_G1WPW5	0.000948	0	0.000109161	7.61652e-05
UniRef90_A0A134C1F2	0	0	0.000716394	0.000413782
UniRef90_D4J7U5	0	0.00112763	0	6.14052e-07
UniRef90_A0A174THG6	0	0.00108405	2.31582e-05	2.04756e-05
UniRef90_W1HUA0	0	0	0.00031905	0.000806393
UniRef90_B0MSI8	0	0.00106635	3.88398e-05	1.96016e-05
UniRef90_A0A0P0FIZ7	0.001106	0	1.32965e-05	4.45708e-06
UniRef90_A0A127SYG2	0	0.00111906	0	0
UniRef90_A5Z319	0.000272712	0.00066064	0.00018234	0
UniRef90_H3K5V4	0	0.00109004	1.69828e-05	8.348e-06
UniRef90_A0A1C3Q7K1	0	0	0.000310132	0.000804236
UniRef90_A7UXY6	0.000493588	0	0.000325131	0.000295578
UniRef90_U2SXH0	0.001106	0	0	6.99712e-07
UniRef90_A0A139LFR1	0.001106	0	0	2.23152e-07
UniRef90_H3K920	0	0.00106635	2.12216e-05	1.79276e-05
UniRef90_H3KAV4	0	0.00106635	2.39064e-05	1.43286e-05
UniRef90_A0A174X1K0	0	0.00109004	7.09708e-06	4.56218e-06
UniRef90_B0MY97	0.00107611	0	1.77495e-05	4.49366e-06
UniRef90_A5KRE0	0	0.000925508	0.000110107	6.00282e-05
UniRef90_A0A017N217	0	0	0.000569764	0.000522722
UniRef90_A5KNW8	0	0	0.000695434	0.000395876
UniRef90_A0A139L203	0	0	0.000687395	0.000403866
UniRef90_A5KKF9	0	0	0.000782878	0.000306496
UniRef90_A0A395VY76	0.00105113	0	2.49141e-05	1.13997e-05
UniRef90_A0A174UML5	0	0.00090837	0.000106066	7.21222e-05
UniRef90_A0A174QBF2	0	0.000223982	0.000481786	0.000377588
UniRef90_J2DQT7	0	0	0.000326762	0.000756326
UniRef90_A0A378FZL9	0	0.000971326	4.04722e-05	6.69544e-05
UniRef90_A0A134C2J0	0.00107611	0	4.3577e-07	1.95463e-06
UniRef90_I9RI83	0.00103016	0	2.2314e-05	2.33536e-05
UniRef90_C0B7X5	0.000903348	0	9.84576e-05	7.32192e-05
UniRef90_A0A396F6F3	0.000291692	0.00071871	3.00358e-05	2.77764e-05
UniRef90_A0A395V1U7	0.0010535	0	7.06226e-06	5.07118e-06
UniRef90_A0A1S8YBB5	0	0	0.000389371	0.0006751
UniRef90_UPI000EBCE75A	0.000983112	0	4.58024e-05	3.4762e-05
UniRef90_A0A173UKF2	0.00104779	0	7.30326e-06	5.66076e-06
UniRef90_A0A0F3HBX6	0	0.00105488	0	1.26956e-06
UniRef90_A5KRH1	0.000800342	0	0.00015465	9.89354e-05
UniRef90_A0A377ZDB3	0	0	0.000368958	0.000684946
UniRef90_C8T5D7	0.000948	0	4.21096e-05	6.25714e-05
UniRef90_A0A377R801	0	0	0.000334068	0.000717737
UniRef90_Q45122	0.00026544	0	0.0004237	0.000361668
UniRef90_D4L1Y5	0.00102092	0	1.91943e-05	1.05496e-05
UniRef90_J2DR23	0	0	0.000458241	0.00059197
UniRef90_A0A3E2VU96	0.000948	0	4.93864e-05	4.30948e-05
UniRef90_A0A3E4V618	0.00102092	0	6.388e-06	4.32442e-06
UniRef90_A0A0B7GJM3	0	0.00086056	6.55074e-05	0.000101533
UniRef90_A0A108T4W7	0	0.00102192	4.4485e-07	2.72518e-06
UniRef90_R6Q8L0	0	0	0.000589965	0.000435072
UniRef90_A0A3E2VAH5	0.00102092	0	2.39578e-06	1.41579e-06
UniRef90_A0A384EQI9	0	0	0.000482678	0.000540266
UniRef90_R6WJ37	0.00102092	0	0	0
UniRef90_A0A134C948	0	0.00101138	2.38912e-06	2.6012e-06
UniRef90_A0A1S8YAD1	0	0	0.000305924	0.000709403
UniRef90_A0A378AQ30	0.00101056	0	2.15684e-07	1.37639e-06
UniRef90_A0A348T152	0	0.00100879	2.84706e-06	0
UniRef90_A8S539	0	0	0.000596196	0.000413422
UniRef90_D1K970	0	0.000961804	2.11404e-05	2.2666e-05
UniRef90_A0A378ECI3	0	0	0.000352456	0.000650132
UniRef90_Q5LB55	0.000948	0	2.93174e-05	2.07414e-05
UniRef90_A0A396A3B4	0	0.000934324	3.8634e-05	2.39562e-05
UniRef90_Q6U5J8	0	0	0.000370068	0.000625478
UniRef90_A0A0B7GEC5	0.000948	0	2.09594e-05	2.63684e-05
UniRef90_A0A173RIE8	0	0.000957134	1.6831e-05	2.05436e-05
UniRef90_A0A174V851	0	0.000971327	9.54509e-06	7.30061e-06
UniRef90_C8ZZG9	0	0.000971326	1.20925e-05	0
UniRef90_A0A174Q9G9	0	0	0.000546068	0.000435838
UniRef90_A7AJP9	0	0	0.000550438	0.000428272
UniRef90_B0MU88	0.000948	0	2.17952e-05	4.27692e-06
UniRef90_A7B5X1	0.0002212	0.000545022	0.000207216	0
UniRef90_A0A174PRH5	0.000915312	0	2.95544e-05	2.66006e-05
UniRef90_C3R499	0	0	0.00049268	0.000476968
UniRef90_A6BFL8	0	0.000957134	4.97506e-06	7.1821e-06
UniRef90_A0A395X5F0	0	0.000934324	2.05442e-05	1.35055e-05
UniRef90_A6L0Y7	0	0.000929916	1.83714e-05	1.96109e-05
UniRef90_A0A174PBI7	0	0.000961804	2.08536e-06	2.2036e-06
UniRef90_J2E3H5	0	0	0.000329766	0.000635648
UniRef90_R6Y9C5	0	0.000961804	1.74834e-06	6.69146e-07
UniRef90_A0A017N1U6	0	0	0.000536582	0.00042541
UniRef90_A0A2A7A1Y8	0.000951808	0	3.00772e-06	3.09058e-06
UniRef90_A0A139TD70	0	0.00090837	2.78196e-05	2.16872e-05
UniRef90_E5UZD3	0	0	0.000482706	0.00047357
UniRef90_D3LT14	0.000948	0	2.8193e-06	3.3564e-06
UniRef90_A0A1E3U755	0.000541714	0	0.000225574	0.000186027
UniRef90_A0A0E1C7V0	0	0	0.000383298	0.000568158
UniRef90_C0EWA3	0	0	0.000507536	0.000442896
UniRef90_A0A2D1TZK6	0	0.00090837	2.4187e-05	1.53795e-05
UniRef90_V0ARW3	0	0	0.000292854	0.000653264
UniRef90_A0A174LMH0	0	0.000921163	1.17653e-05	1.15463e-05
UniRef90_A0A2N5NS38	0	0.000809108	8.65179e-05	4.74564e-05
UniRef90_F3QKQ8	0.000491556	0	0.00018859	0.000257222
UniRef90_A0A174DIW8	0	0.000831389	6.18319e-05	4.3854e-05
UniRef90_C7HAJ7	0.0008848	0	2.46976e-05	2.73694e-05
UniRef90_A0A174HY01	0	0.00080413	7.44974e-05	5.26518e-05
UniRef90_K1G4E5	0	0.000895926	1.9413e-05	1.57573e-05
UniRef90_UPI000E4A0F83	0.000930282	0	2.01442e-07	0
UniRef90_D4LZ59	0.0008848	0	2.98807e-05	1.3879e-05
UniRef90_A0A1D3U3C6	0	0.000743212	5.79944e-05	0.000116615
UniRef90_A0A3A1LY97	0.000805722	0	3.7849e-05	7.36729e-05
UniRef90_A8S6L0	0	0.000891854	1.40899e-05	7.27244e-06
UniRef90_D4LYG3	0	0.00087963	1.87025e-05	1.32202e-05
UniRef90_W1EDM3	0	0	0.000263852	0.000647504
UniRef90_B0MUT9	0.000894484	0	1.16874e-05	4.13558e-06
UniRef90_E2N7L5	0	0	0.00047922	0.00042696
UniRef90_D1JX87	0	0	0.0005371	0.000369054
UniRef90_A5ZSE5	0.000780706	0	8.25476e-05	4.23152e-05
UniRef90_H3KB91	0	0.00086056	2.58317e-05	1.75219e-05
UniRef90_A0A396FGB3	0.000510462	0	0.000229202	0.000163779
UniRef90_C4ZED7	0.000865962	0	2.05186e-05	1.68544e-05
UniRef90_A0A1C5V5X4	0	0.000902798	0	0
UniRef90_A0A395VTK5	0.0007584	0	8.1892e-05	6.0426e-05
UniRef90_B0G8A6	0.0008848	0	9.54582e-06	5.80924e-06
UniRef90_A0A174Y262	0.0006636	0	0.000139077	9.61253e-05
UniRef90_A5KR94	0	0.00060558	0.000171503	0.000121114
UniRef90_A0A377XIS3	0	0	0.000325502	0.000569478
UniRef90_U2EGS2	0	0.000875928	1.08163e-05	7.45704e-06
UniRef90_A0A174TB82	0	0.000875928	1.11611e-05	5.4578e-06
UniRef90_A0A069S980	0.0004605	0	0.000205437	0.000223506
UniRef90_A0A0E1CR28	0	0	0.000338086	0.000550064
UniRef90_A0A139T702	0	0	0.000492467	0.000391038
UniRef90_A0A174Y4H9	0	0.00086056	1.18079e-05	1.05948e-05
UniRef90_A0A069SJ06	0	0.00083139	2.06948e-05	3.00104e-05
UniRef90_D4J9J8	0	0.000879068	9.12296e-07	1.0312e-06
UniRef90_A0A333FMK7	0.000717406	0	5.9032e-05	9.85564e-05
UniRef90_E0PSJ1	0.000870296	0	0	1.10119e-07
UniRef90_A0A378BLY1	0.000865566	0	5.47506e-07	3.47838e-06
UniRef90_A0A3E4H4J9	0	0.000817532	2.52964e-05	2.64634e-05
UniRef90_U2KD22	0	0.000868176	5.66888e-07	2.85022e-07
UniRef90_UPI000CFAAAB4	0	0	0.000306472	0.000562294
UniRef90_Q5LH21	0	0	0.000534916	0.000331666
UniRef90_A0A015ZC13	0	0	0.000568234	0.000297734
UniRef90_A0A2Z3EUW6	0	0.00080413	2.68748e-05	3.42054e-05
UniRef90_A0A0E2SUB3	0	0	0.000604538	0.00026059
UniRef90_A0A2A7A8S5	0.000856258	0	3.04558e-06	5.2788e-06
UniRef90_A0A1Q4PMN4	0	0.000864352	0	0
UniRef90_R7D9J0	0	0.0008557	4.23516e-06	1.77847e-06
UniRef90_E5XFH7	0.00081674	0	2.74224e-05	1.6082e-05
UniRef90_A0A1Q6J6J1	0.0008295	0	1.27169e-05	1.54256e-05
UniRef90_A7B8Q0	0.000101056	0.000754646	1.07337e-07	0
UniRef90_UPI000472EE24	0.000855246	0	1.5586e-07	0
UniRef90_A0A0M6W9J4	0	0.000766762	5.57132e-05	3.25022e-05
UniRef90_A0A1D3U5B9	0	0.000738416	3.72962e-05	7.85858e-05
UniRef90_A8S7K9	0	0.000838496	6.86578e-06	3.81162e-06
UniRef90_Q3YX17	0	0.000730074	4.2759e-05	7.63076e-05
UniRef90_D1JWW0	0	0	0.000454232	0.000392658
UniRef90_A0A378FZU0	0	0.000797594	1.44391e-05	3.18722e-05
UniRef90_A0A329UQ78	0.0008295	0	6.72406e-06	6.69792e-06
UniRef90_A0A2V2P550	0.000842668	0	1.148e-07	0
UniRef90_E2N7L9	0	0	0.000461982	0.00038054
UniRef90_A0A108T305	0	0.000838496	7.99272e-07	1.21812e-06
UniRef90_A0A1D3KBW9	0	0	0.000201544	0.000637154
UniRef90_A6L672	0.0007584	0	4.1002e-05	3.63654e-05
UniRef90_A0A329UDI1	0.0008295	0	2.22424e-06	1.37333e-06
UniRef90_A0A2U1BCT7	0.0008295	0	1.7794e-06	1.80708e-06
UniRef90_A0A3E4IHR3	0	0.000817532	9.78374e-06	3.57284e-06
UniRef90_A0A1Y4PSS9	0.000788436	0	2.38616e-05	1.77035e-05
UniRef90_J2E8P1	0	0	0.00028663	0.00054335
UniRef90_A0A2M9USX5	0.000792358	0	2.29832e-05	1.31164e-05
UniRef90_A0A377XHI6	0	0.000817532	3.63888e-06	5.8654e-06
UniRef90_D4M071	0	0.000796786	1.91537e-05	1.01944e-05
UniRef90_UPI000D2F7C66	0	0	0.000259174	0.000566686
UniRef90_F7V3I6	0.000804364	0	1.98608e-05	0
UniRef90_A0A0M6WC89	0.000815068	0	4.86042e-06	2.89652e-06
UniRef90_H3K4T1	0	0.000714878	6.42348e-05	4.34136e-05
UniRef90_A0A377BDM5	0.000785842	0	1.33414e-05	2.31754e-05
UniRef90_C7H3S4	0	0.000797594	9.12308e-06	1.15663e-05
UniRef90_K1SE46	0	0.000817532	0	0
UniRef90_T1DQS5	0.00023015	0.000560594	2.5122e-05	0
UniRef90_A0A3D0F092	0	0.00080145	4.1704e-06	6.89684e-06
UniRef90_A0A173XDS4	0.000804364	0	2.538e-06	1.60379e-06
UniRef90_A0A078S5D6	0	0	0.000361436	0.000446837
UniRef90_A7ALG8	0	0.000797594	5.12996e-06	4.25776e-06
UniRef90_A0A173VXW7	0	0.000766438	2.4578e-05	1.55969e-05
UniRef90_A0A015ZX29	0	0	0.000497652	0.000305592
UniRef90_A0A1S8Y6V2	0	0	0.000290982	0.000511796
UniRef90_V0B0T0	0	0	0.000277168	0.00052358
UniRef90_A6L064	0.0007584	0	1.78392e-05	2.31206e-05
UniRef90_A0A378BD88	0	0.00079922	0	0
UniRef90_A0A173TQQ1	0.000769392	0	1.85186e-05	1.01936e-05
UniRef90_UPI000C9C73F6	0.000780706	0	4.6055e-06	6.0792e-06
UniRef90_Q5LJ21	0	0.00052183	0.000125585	0.000141926
UniRef90_A0A2H2VSZ5	0	0.000563816	7.50782e-05	0.000149247
UniRef90_A0A0E2SUH6	0	0	0.000399808	0.000388161
UniRef90_E1YVP7	0.000698526	0	3.94536e-05	4.99676e-05
UniRef90_A0A1Q6QLH1	0	0.000778602	4.53554e-06	3.24048e-06
UniRef90_D4KYI8	0	0.000636364	8.94716e-05	5.9669e-05
UniRef90_J2X715	0	0	0.000305148	0.000479096
UniRef90_A0A174ZH49	0	0.000778602	3.38932e-06	2.22794e-06
UniRef90_UPI0009DBE405	0	0.000748886	3.36576e-05	0
UniRef90_A0A2P2FCK8	0	0.000778602	3.2226e-06	4.47816e-07
UniRef90_J2DKM6	0	0	0.000295328	0.000486406
UniRef90_I9QVV4	0.000689456	0	4.55222e-05	4.49104e-05
UniRef90_C7H4Q9	0	0.000743212	1.75132e-05	1.63013e-05
UniRef90_I3YK78	0	0.000743212	2.27294e-05	1.05669e-05
UniRef90_A0A174H7L8	0	0.000743212	2.3307e-05	9.20726e-06
UniRef90_B0MSF8	0.000737334	0	2.4914e-05	9.38206e-06
UniRef90_A0A377BEH0	0	0.000568719	7.1447e-05	0.000130284
UniRef90_W1HMK6	0	0	0.000221428	0.000548318
UniRef90_B6VYA5	0.000698526	0	3.3354e-05	3.6996e-05
UniRef90_E8JQU2	0.000737334	0	1.59866e-05	1.5553e-05
UniRef90_Q5LGC0	0	0	0.000498612	0.000269862
UniRef90_A0A1C3PW96	0	0	0.000281968	0.000486496
UniRef90_B2VBJ9	0.00067297	0	3.04068e-05	6.13665e-05
UniRef90_A0A1E3UMM8	0	0.000760496	1.65525e-06	1.55269e-06
UniRef90_A0A1B8WYG4	0.0007584	0	2.23696e-06	2.4403e-06
UniRef90_F0YTM9	0.000727234	0	2.2365e-05	1.29271e-05
UniRef90_A0A1C7H3D7	0.000717407	0	2.39798e-05	1.98127e-05
UniRef90_H3K8G1	0	0.000710898	2.50218e-05	2.36012e-05
UniRef90_A0A0M6WF26	0.000737334	0	1.25178e-05	8.27892e-06
UniRef90_A0A396EVG9	0.000632	0	5.9875e-05	6.38736e-05
UniRef90_D4JKW4	0.000737334	0	1.3196e-05	5.16164e-06
UniRef90_F3ABU3	0	0.000754646	0	0
UniRef90_G1WSF4	0	0.000743212	5.79252e-06	2.70196e-06
UniRef90_A0A174DC02	0.000457656	0	0.000175575	0.000116936
UniRef90_A0A1Y4PBI7	0	0.000681278	3.58752e-05	2.8965e-05
UniRef90_C0EVR2	0.000737334	0	5.04928e-06	3.29166e-06
UniRef90_K7ZQ45	0	0	0.00041603	0.000328284
UniRef90_V0B2N5	0	0	0.000301148	0.000441766
UniRef90_A0A0M6WIZ6	0.000729231	0	5.12398e-06	5.51858e-06
UniRef90_A0A263K1U3	0.000698526	0	1.92106e-05	2.07226e-05
UniRef90_A0A015U8H2	0.000603273	0	7.58858e-05	5.90214e-05
UniRef90_R5F3W6	0.000737334	0	0	2.17008e-07
UniRef90_A0A174I2V0	0	0	0.0003843	0.000353082
UniRef90_R6P4Y9	0.000720262	0	1.10128e-05	5.51228e-06
UniRef90_A0A0H3H4S5	0	0	0.000268248	0.000467494
UniRef90_A6KXK5	0	0.000700742	1.63985e-05	1.82569e-05
UniRef90_A5KQY9	0	0.000587448	8.92228e-05	5.80962e-05
UniRef90_A0A378FVU3	0.00073057	0	7.13254e-07	1.12235e-06
UniRef90_A8AQG0	0	0.000667373	2.48548e-05	3.98972e-05
UniRef90_A0A377WIL1	0.000669176	0	2.38898e-05	3.6665e-05
UniRef90_A0A271R0A6	0	0.000545022	6.25597e-05	0.000121422
UniRef90_A0A017NI21	0	0	0.00046976	0.000258574
UniRef90_A0A0E2TF43	0	0.000690604	2.07206e-05	1.34859e-05
UniRef90_A0A2N5P2T7	0.000491556	0	0.000138355	9.35866e-05
UniRef90_A0A0P0LKR7	0.000680616	0	2.0964e-05	2.16734e-05
UniRef90_B5XYX3	0	0	0.000220116	0.000503
UniRef90_V0ASF9	0	0	0.00025832	0.000461836
UniRef90_J2X4L3	0	0	0.000249528	0.000470564
UniRef90_A0A015SUH3	0	0	0.000364014	0.00035571
UniRef90_A0A377XFP2	0.000715258	0	1.5473e-06	1.90753e-06
UniRef90_D1JY29	0	0.000716088	1.68004e-06	0
UniRef90_G2T5K3	0.000389138	0	0.000189391	0.000137419
UniRef90_A0A078RCV9	0	0	0.000353174	0.00036276
UniRef90_B0MTD8	0	0	0.000383548	0.000332096
UniRef90_UPI0009B6CAA6	0.000622126	0	4.60996e-05	4.74066e-05
UniRef90_D4M2K9	0	0.000696456	1.1875e-05	6.18358e-06
UniRef90_W1EFU6	0	0	0.000199717	0.000514476
UniRef90_G1WVB0	0	0.000467162	0.000140348	0.000105567
UniRef90_A0A0E1CFL7	0	0	0.000215562	0.000496828
UniRef90_I9QYH8	0.000680616	0	1.50248e-05	1.62417e-05
UniRef90_A0A1S8YGH0	0	0	0.000208202	0.00050321
UniRef90_A0A015TZ85	0	0	0.000324224	0.0003855
UniRef90_A0A329UKY9	0	0.000695772	5.94266e-06	7.36444e-06
UniRef90_C7H1Z3	0.000669176	0	2.16156e-05	1.80959e-05
UniRef90_A5KQL5	0	0	0.000450368	0.000258454
UniRef90_A0A174Q8Q0	0	0.000695773	7.34732e-06	5.19004e-06
UniRef90_C7XFS6	0.0006636	0	2.11782e-05	2.09326e-05
UniRef90_A0A1D3KRW3	0	0	0.000248764	0.00045637
UniRef90_D0TK99	0	0	0.00038518	0.00031815
UniRef90_A5KRL0	0.000432782	0	0.000161686	0.00010864
UniRef90_A0A0E2TF80	0.000680616	0	1.07114e-05	1.146e-05
UniRef90_A0A0B7GFC1	0	0.000695772	2.58212e-06	3.57234e-06
UniRef90_A0A377TUS3	0	0.000681278	7.26382e-06	1.23348e-05
UniRef90_C8T3P2	0	0	0.000231898	0.000468688
UniRef90_A0A378FS32	0	0	0.00027529	0.000425136
UniRef90_A0A174GWF2	0.000698526	0	3.7461e-07	2.60104e-07
UniRef90_Q3K3U5	0.000680616	0	7.1308e-06	1.07801e-05
UniRef90_A0A0E2TC01	0	0	0.00041998	0.00027788
UniRef90_A0A0M6WP78	0.000680616	0	1.01145e-05	4.83072e-06
UniRef90_R7P5J7	0.000612554	0	4.4798e-05	3.59648e-05
UniRef90_D1JPL1	0	0.000660632	1.9572e-05	1.25093e-05
UniRef90_A0A0B7G6W0	0	0.000577082	3.96398e-05	7.57272e-05
UniRef90_A0A3E4VCL6	0	0.000617006	4.47235e-05	3.02378e-05
UniRef90_D4M084	0	0	0.000422014	0.000269508
UniRef90_A0A078QQC0	0	0	0.000427388	0.000263876
UniRef90_A0A174T7Z7	0	0.000667374	1.53292e-05	7.59462e-06
UniRef90_D1JS86	0.000647416	0	2.37856e-05	1.90453e-05
UniRef90_B6FUZ0	0	0.000681278	5.79004e-06	2.5513e-06
UniRef90_A0A174X0M6	0	0	0.000308074	0.000381454
UniRef90_A0A0E2T6J1	0	0	0.000434358	0.000255158
UniRef90_A0A3E4HP53	0	0	0.000348294	0.000341216
UniRef90_F3ASF5	0.000632	0	3.46784e-05	2.1069e-05
UniRef90_A0A015V3U9	0.000683536	0	2.52954e-06	1.18071e-06
UniRef90_D4LVY8	0	0.000628872	3.27089e-05	2.55642e-05
UniRef90_R7N8F4	0.0006636	0	1.41028e-05	7.2668e-06
UniRef90_A0A0E2RSV5	0	0	0.000326862	0.000357916
UniRef90_A0A1D3KNN4	0	0.000457722	7.42169e-05	0.000152091
UniRef90_Q650H6	0	0.000639734	2.5687e-05	1.81934e-05
UniRef90_K1ST80	0.000682076	0	1.18823e-06	0
UniRef90_A0A174FDT7	0.0006636	0	1.08435e-05	7.6045e-06
UniRef90_D1KAJ3	0.000250416	0.000310456	0.000120976	0
UniRef90_A0A0I9RKK1	0.000680616	0	3.63458e-07	3.7863e-07
UniRef90_J2XAK5	0	0	0.00025012	0.000430928
UniRef90_A0A2A2SRN8	0.000510462	0	5.62393e-05	0.00011407
UniRef90_V0AH45	0	0	0.000324724	0.000351884
UniRef90_R5RM81	0	0.000628872	2.49608e-05	2.25422e-05
UniRef90_B6FQM2	0	0.000661628	8.5106e-06	6.12776e-06
UniRef90_W1HXB5	0	0	0.000243812	0.000432206
UniRef90_A5ZNS7	0	0.000563816	6.37126e-05	4.68098e-05
UniRef90_A0A378B5N3	0	0.000563816	3.50318e-05	7.36536e-05
UniRef90_R5JRT8	0.0006636	0	3.74272e-06	4.6011e-06
UniRef90_A0A1F0BMT3	0.0006636	0	3.07664e-06	4.41192e-06
UniRef90_R9HKL7	0.000632	0	2.09478e-05	1.65711e-05
UniRef90_A0A173X6D3	0.000647416	0	1.05896e-05	1.07867e-05
UniRef90_A0A017N405	0	0	0.00038093	0.000287222
UniRef90_A0A078R2Y3	0.00053088	0	8.5973e-05	4.88752e-05
UniRef90_C7H9B7	0	0.000628872	1.62164e-05	1.98188e-05
UniRef90_R6IGU9	0.000652722	0	5.37008e-06	6.01562e-06
UniRef90_B0NQX2	0.0006636	0	0	4.47816e-07
UniRef90_A0A2J3D7Q6	0.000358702	0	0.000100246	0.00020488
UniRef90_A0A0M6WMU0	0.0006636	0	0	0
UniRef90_A0A396FM87	0	0.000495474	0.000102717	6.44104e-05
UniRef90_A0A264C5W0	0.000647416	0	5.31582e-06	9.59588e-06
UniRef90_A8SBJ8	0.00030459	0	0.000198448	0.000159044
UniRef90_A0A395VF54	0.000632	0	1.60632e-05	1.33242e-05
UniRef90_A0A2A7A8K8	0	0.000654026	2.7042e-06	2.54296e-06
UniRef90_A0A078QUL4	0	0.000628872	1.5905e-05	1.298e-05
UniRef90_A0A015UKJ0	0	0	0.000267712	0.000389224
UniRef90_UPI00090797F3	0	0.000583952	2.3617e-05	4.85284e-05
UniRef90_A0A015YH64	0.000491556	0	8.3832e-05	7.97226e-05
UniRef90_D7GUU0	0	0.000654026	3.80456e-07	5.59662e-07
UniRef90_A0A0J4Y5U0	0	0	0.000261605	0.000392362
UniRef90_R9HL83	0	0	0.000352784	0.000300096
UniRef90_A0A174XWB9	0.000642194	0	5.4314e-06	3.50654e-06
UniRef90_B3JII1	0.000352354	0	0.000148356	0.000148256
UniRef90_UPI0009E416E6	0	0.000648264	0	0
UniRef90_G1ULT6	0	0	0.000361354	0.000286534
UniRef90_A0A3E2V7T5	0.000617302	0	1.45706e-05	1.5696e-05
UniRef90_E5VKQ7	0	0.00060558	2.30568e-05	1.8405e-05
UniRef90_A0A3E4L474	0	0.00050569	8.95222e-05	5.16026e-05
UniRef90_D1PIZ4	0.000639614	0	4.69404e-06	2.22206e-06
UniRef90_R7NA06	0.000625764	0	1.07054e-05	9.17122e-06
UniRef90_A0A1S8Y7R7	0.00053088	0	4.17124e-05	7.27484e-05
UniRef90_A0A2Z6ELF1	0.000534444	0	3.46309e-05	7.5355e-05
UniRef90_R8WNR8	0	0	0.000202356	0.000439928
UniRef90_A0A2X3EJ59	0	0.000639808	1.0703e-06	1.35247e-06
UniRef90_Q51770	0.000632	0	3.73372e-06	5.1794e-06
UniRef90_A0A017PFV9	0	0	0.000335772	0.000304518
UniRef90_B6VUG0	0	0.000628872	4.80514e-06	5.29864e-06
UniRef90_UPI000E41D293	0.00063876	0	0	0
UniRef90_A0A158T0E7	0	0.000637038	1.6499e-06	0
UniRef90_A0A2M9UXM7	0	0.00060558	1.78594e-05	1.43954e-05
UniRef90_D4LMS0	0	0.000628872	3.94164e-06	4.95616e-06
UniRef90_A0A377WLB8	0	0.000634978	3.45514e-07	1.00195e-06
UniRef90_A0A3E4JIY8	0.000553	0	4.22718e-05	4.03146e-05
UniRef90_G6EQK5	0	0.000632928	1.36452e-07	0
UniRef90_A0A174ADR7	0	0.000617006	7.34406e-06	7.44334e-06
UniRef90_A0A174BU89	0	0.000628872	1.64607e-06	3.9135e-07
UniRef90_A7VFF7	0	0.000583952	2.98562e-05	1.6611e-05
UniRef90_Q57GJ8	0.00049654	0	4.77072e-05	8.39421e-05
UniRef90_H1DEA7	0	0.000622882	2.26664e-06	1.69467e-06
UniRef90_I4Z7P1	0.000525624	0	4.74858e-05	5.31168e-05
UniRef90_A0A173XBM6	0	0	0.00033968	0.00028524
UniRef90_A0A377ZV09	0	0.000623542	4.6419e-07	5.18396e-07
UniRef90_W1H1K4	0	0	0.000204424	0.000420006
UniRef90_A0A016E8C6	0	0	0.000334908	0.000289112
UniRef90_A0A174GL24	0	0.000620912	1.61705e-06	1.06153e-06
UniRef90_A0A376LNJ0	0	0.000623542	0	0
UniRef90_A0A1Q6JQX5	0	0.00060558	1.12862e-05	5.23298e-06
UniRef90_UPI0004299DA4	0	0	0.000237456	0.000384548
UniRef90_A0A076J092	0	0.000583952	1.74436e-05	2.00588e-05
UniRef90_W8UYG9	0	0	0.000228856	0.000392222
UniRef90_A0A174SGS4	0	0.000454184	9.20931e-05	7.40256e-05
UniRef90_A0A139TDN8	0	0.000563816	3.20258e-05	2.44302e-05
UniRef90_C7H970	0	0	0.00033942	0.000279972
UniRef90_A0A0E2T3V0	0	0	0.000320096	0.000299184
UniRef90_G1ULT4	0	0	0.00029979	0.000319366
UniRef90_A0A174CTY8	0.000444134	0	0.000100028	7.4656e-05
UniRef90_B0MW34	0.000603274	0	1.14626e-05	3.81102e-06
UniRef90_U2PKZ2	0	0	0.000376868	0.000240113
UniRef90_A0A1S8Y936	0	0	0.000189634	0.000426601
UniRef90_C6Z819	0.000603274	0	3.91028e-06	7.16264e-06
UniRef90_C7H4A9	0	0	0.00038435	0.000229728
UniRef90_UPI000E55D1D9	0.000613604	0	0	0
UniRef90_A0A378A1U0	0.000612554	0	0	0
UniRef90_A0A136Q5X8	0.000493842	0	6.92824e-05	4.84025e-05
UniRef90_A0A1S8Y6E0	0	0	0.000195765	0.00041569
UniRef90_A0A377THI8	0	0	0.000192175	0.000418652
UniRef90_F4XHV1	0.000583385	0	1.59691e-05	9.83655e-06
UniRef90_A0A1C5UZK3	0.000608654	0	0	0
UniRef90_A0A332XFI7	0	0.00060558	1.8453e-06	8.76408e-07
UniRef90_G6EMA8	0.000607878	0	0	0
UniRef90_A0A2H4WJW8	0	0.00060558	1.302e-07	0
UniRef90_UPI0009456BE5	0.000571522	0	1.53397e-05	1.84922e-05
UniRef90_A0A0R2EJR8	0	0.000603734	4.61324e-07	5.42158e-07
UniRef90_A0A069S6R9	0.000349264	0.00023029	1.28265e-05	9.96232e-06
UniRef90_J2LQ16	0	0	0.000226294	0.000375748
UniRef90_A0A1S8Y428	0	0	0.000234858	0.000366386
UniRef90_A0A2A5MSD2	0.000491556	0	4.35008e-05	6.52692e-05
UniRef90_A0A395VT16	0	0.000480901	6.23199e-05	5.56164e-05
UniRef90_D4IQU6	0	0	0.000395026	0.000203532
UniRef90_H3K9W0	0	0	0.000373674	0.000223082
UniRef90_I3YJD4	0.000545426	0	2.9728e-05	1.93671e-05
UniRef90_A0A396A9Y4	0.000299802	0	0.000172943	0.000121566
UniRef90_A0A174PY25	0	0.000393992	0.000122344	7.71851e-05
UniRef90_J2LSL3	0.000457656	0	5.49e-05	8.01742e-05
UniRef90_A0A174TQ50	0	0.000551146	1.53877e-05	2.59558e-05
UniRef90_A0A1K0CRY8	0.000437538	0	5.24978e-05	0.000102102
UniRef90_R6X4M3	0.000577044	0	8.91972e-06	5.9015e-06
UniRef90_F3QKQ7	0.000402182	0	8.52818e-05	0.000103961
UniRef90_U2PI04	0.000587698	0	2.5307e-06	1.1613e-06
UniRef90_R5CY85	0.000589868	0	3.95422e-07	8.77002e-07
UniRef90_A0A396MKK7	0.000589868	0	0	0
UniRef90_A0A3E5FE99	0.000531324	0	5.82604e-05	0
UniRef90_D4K7U6	0.000577044	0	6.92846e-06	3.50592e-06
UniRef90_A0A015XIG2	0.000553	0	1.76464e-05	1.66578e-05
UniRef90_A0A076J4I8	0	0.000558749	1.3161e-05	1.50627e-05
UniRef90_A0A076IN24	0	0.00055426	1.99996e-05	1.23664e-05
UniRef90_C7HAI9	0.00053088	0	2.29958e-05	3.26976e-05
UniRef90_C7H595	0	0	0.000257936	0.000328598
UniRef90_A0A174XJF1	0.0005473	0	2.33524e-05	1.53693e-05
UniRef90_A0A174QQH9	0.000564767	0	9.47394e-06	1.15587e-05
UniRef90_A0A396EV21	0	0.000585696	0	0
UniRef90_G1ULG1	0	0	0.000186038	0.000398836
UniRef90_A0A016EE55	0	0	0.000331798	0.000250702
UniRef90_W1E832	0	0	0.000224204	0.000357526
UniRef90_A0A015WI01	0	0	0.00038021	0.000198996
UniRef90_A0A0M6WV51	0	0.000567732	7.8979e-06	3.51802e-06
UniRef90_UPI000E53C057	0	0.000577082	0	0
UniRef90_A0A396E5C3	0.000457656	0	6.33154e-05	5.59138e-05
UniRef90_A0A174UPV9	0	0.000563816	7.511e-06	4.90498e-06
UniRef90_A0A174NSN4	0.000532518	0	2.4202e-05	1.94402e-05
UniRef90_I8ZKF0	0.000553	0	1.74554e-05	5.54156e-06
UniRef90_W1G6E8	0	0.000467162	4.08898e-05	6.75726e-05
UniRef90_R5JTD0	0	0.000573708	6.2435e-07	1.2238e-06
UniRef90_A0A1C6GUX8	0.000574414	0	0	0
UniRef90_R6I4V6	0	0.000563816	7.21642e-06	3.06756e-06
UniRef90_A5KL21	0	0	0.00035824	0.000214612
UniRef90_A0A1H7RXF7	0.000538054	0	1.8935e-05	1.56297e-05
UniRef90_A0A174Y7G5	0.00053088	0	2.71716e-05	1.42662e-05
UniRef90_D4JC33	0.00057084	0	4.592e-07	5.30214e-07
UniRef90_A0A0E1CKP6	0	0	0.000156219	0.000415412
UniRef90_R7JI02	0.000559118	0	8.35882e-06	3.22396e-06
UniRef90_A0A395VNN1	0.0004424	0	7.36508e-05	5.38762e-05
UniRef90_F7LSR4	0.000523896	0	2.79632e-05	1.78402e-05
UniRef90_A7LYP6	0.0005688	0	0	0
UniRef90_A0A176U3W1	0	0	0.000291822	0.0002768
UniRef90_UPI000C7966AA	0	0.000545022	7.03358e-06	1.60948e-05
UniRef90_A0A081U2W9	0.000510462	0	3.49136e-05	2.24844e-05
UniRef90_Q64ZG1	0	0.00052744	2.213e-05	1.82094e-05
UniRef90_A0A378FN97	0.0004424	0	4.73184e-05	7.77484e-05
UniRef90_B5CNA7	0	0.00030937	0.000153296	0.000103045
UniRef90_A8SA18	0	0	0.0002622	0.000302132
UniRef90_C3RE68	0	0.000510958	2.84471e-05	2.44744e-05
UniRef90_A0A078R097	0	0	0.000300058	0.000262486
UniRef90_A0A2M9VDH3	0	0	0.00032296	0.000238264
UniRef90_A0A1D3KVR6	0	0.000545022	6.68116e-06	9.16157e-06
UniRef90_A0A377TYX3	0	0.000559796	4.30156e-07	6.35392e-07
UniRef90_J2E6Y1	0	0	0.000199292	0.000360696
UniRef90_A0A174I6W1	0	0.000557408	1.09501e-06	1.20123e-06
UniRef90_B0MUA3	0.000545426	0	1.06971e-05	2.91852e-06
UniRef90_A0A2M9V9B2	0	0.00052744	1.69861e-05	1.28686e-05
UniRef90_A0A2X3FQD4	0	0	0.000236133	0.000319876
UniRef90_A0A173VIP0	0	0.000503098	2.60852e-05	2.64972e-05
UniRef90_S3Y9J8	0	0	0.000290588	0.00026425
UniRef90_R6PBZ1	0	0.00055426	3.6886e-07	0
UniRef90_B3JM61	0	0.000454184	4.80669e-05	5.19334e-05
UniRef90_A0A174YPW0	0.000553	0	0	0
UniRef90_A0A120A3C2	0	0.000495474	3.05587e-05	2.50632e-05
UniRef90_F3PNL7	0.00042813	0	6.65866e-05	5.61996e-05
UniRef90_A0A1C5UDV3	0.00054264	0	6.51772e-06	0
UniRef90_A0A2X3F9G6	0	0.000548066	5.24014e-07	0
UniRef90_A0A174LP11	0.000476838	0	3.94634e-05	3.18738e-05
UniRef90_B0MXC4	0.000536242	0	8.60126e-06	2.89666e-06
UniRef90_A6TEY2	0	0.000467162	3.49898e-05	4.55242e-05
UniRef90_J2DPL5	0	0	0.00021931	0.000328022
UniRef90_A6TF33	0.000382846	0	6.0618e-05	0.000103327
UniRef90_A0A127SY71	0	0.00054201	4.41228e-06	0
UniRef90_B0G6V9	0	0.000510958	1.95617e-05	1.56096e-05
UniRef90_K1RUQ6	0.000545426	0	0	0
UniRef90_A0A016C0M6	0	0.000510958	1.84151e-05	1.58602e-05
UniRef90_A0A174WKC3	0	0.00052183	1.22237e-05	1.03426e-05
UniRef90_A7MHU8	0	0	0.000236308	0.00030582
UniRef90_A0A076J8A3	0	0.000510958	1.59769e-05	1.50185e-05
UniRef90_A0A2J1D4B4	0.000541714	0	0	0
UniRef90_A0A377M8U6	0.000541714	0	0	0
UniRef90_A0A173VSR0	0	0.000510958	1.83175e-05	1.22653e-05
UniRef90_A0A174HS73	0.000518782	0	1.36422e-05	8.08566e-06
UniRef90_A0A078R8V0	0	0	0.000330968	0.00020914
UniRef90_A0A0T5XH52	0	0.000473932	2.42394e-05	4.18608e-05
UniRef90_C7H2Q5	0.000491556	0	2.54016e-05	2.25868e-05
UniRef90_A0A397WLL1	0	0.00052045	7.36458e-06	1.14681e-05
UniRef90_A0A074UG78	0	0.000539032	0	0
UniRef90_A0A174R3C1	0	0.00052744	5.9675e-06	5.51502e-06
UniRef90_R6AB84	0	0.000536088	1.39041e-06	1.3607e-06
UniRef90_C7H2Z8	0	0.000510958	1.26337e-05	1.51641e-05
UniRef90_D6DKS0	0.000510462	0	1.5355e-05	1.23654e-05
UniRef90_J2DQN3	0	0	0.000153631	0.00038443
UniRef90_W9B5X3	0.000532662	0	9.76658e-07	3.79598e-06
UniRef90_D4M078	0.000491556	0	2.84224e-05	1.72514e-05
UniRef90_A0A078T6L4	0	0	0.000279403	0.000257728
UniRef90_A0A157VJ92	0	0	0.000183532	0.000353056
UniRef90_K1V2N8	0.000535882	0	0	0
UniRef90_A0A174CGS2	0.00053088	0	2.13434e-06	1.66467e-06
UniRef90_U3TZ66	0	0	0.00022073	0.0003138
UniRef90_C3QW99	0.000457656	0	4.23307e-05	3.3699e-05
UniRef90_UPI0009D68BD7	0.00053088	0	2.71336e-06	0
UniRef90_A0A0E1CBH7	0	0	0.000363506	0.000170081
UniRef90_A8S6F0	0.000232842	0	0.000171172	0.000129293
UniRef90_W1H320	0	0	0.000174521	0.000358736
UniRef90_Q8A1F6	0	0	0.000295914	0.000236482
UniRef90_A0A0P0LKC3	0	0.000352821	8.54154e-05	9.38332e-05
UniRef90_A0A373CGS6	0	0.00052744	3.89988e-06	0
UniRef90_A0A1D3KGU8	0.00035392	0	6.08566e-05	0.000115903
UniRef90_A0A174WVW6	0.00052047	0	4.74506e-06	5.2209e-06
UniRef90_A0A370YJL9	0	0	0.00019034	0.000339552
UniRef90_A0A174JS71	0	0.00052744	1.148e-06	9.18484e-07
UniRef90_A0A2H9G3H3	0.000340308	0	6.64842e-05	0.000122448
UniRef90_W1HVG3	0	0	0.000194365	0.000334754
UniRef90_H3K8F7	0	0.000499256	1.55231e-05	1.41154e-05
UniRef90_A0A173XKD5	0.000515418	0	6.43852e-06	6.00364e-06
UniRef90_A0A2X3GGP2	0	0	0.000192492	0.000334746
UniRef90_E4VRZ2	0	0	0.000323117	0.000203934
UniRef90_A0A384IJR0	0	0.000419248	4.01038e-05	6.74734e-05
UniRef90_W1DDZ0	0	0.000526812	0	0
UniRef90_A0A2U0MAH5	0	0	0.00017349	0.000352036
UniRef90_J2LUG2	0	0	0.000175443	0.000349792
UniRef90_A0A174ATW7	0	0.000510958	6.58084e-06	7.48028e-06
UniRef90_A7AGT8	0	0.000510958	8.22742e-06	5.78438e-06
UniRef90_E2ZMT7	0.000491556	0	1.56677e-05	1.77455e-05
UniRef90_UPI0008FFD16D	0	0.00052462	1.13578e-07	0
UniRef90_V0AEU7	0	0	0.000210032	0.000313586
UniRef90_Q8A4A3	0.000474	0	2.66446e-05	2.25996e-05
UniRef90_C0FV99	0.000491556	0	1.74187e-05	1.37341e-05
UniRef90_A0A173WK58	0	0.000510958	7.11758e-06	4.32206e-06
UniRef90_A0A395ZEV5	0.000510462	0	7.93538e-06	3.46094e-06
UniRef90_A0A139T786	0	0	0.000291454	0.000229784
UniRef90_A0A2J4JSV3	0.00052047	0	2.62278e-07	0
UniRef90_A0A174MEH2	0	0.000519069	4.5191e-07	8.73396e-07
UniRef90_A0A163XGL5	0.000368666	0	5.78186e-05	9.39068e-05
UniRef90_U2J7N1	0.00050083	0	1.53213e-05	3.95536e-06
UniRef90_A0A378AWN3	0	0.000516336	1.71672e-06	1.7158e-06
UniRef90_A0A378G4B8	0.000517092	0	9.0914e-07	1.40344e-06
UniRef90_J2X523	0	0	0.000166374	0.000352738
UniRef90_A0A2X3DAC7	0	0.000467162	1.82574e-05	3.35442e-05
UniRef90_A0A0I9S5C8	0	0.000467162	2.38242e-05	2.7202e-05
UniRef90_A0A396EK01	0	0	0.000253348	0.000264666
UniRef90_A0A099PP31	0	0	0.000158748	0.000358418
UniRef90_R7N1F8	0.0004424	0	4.63464e-05	2.8014e-05
UniRef90_A0A174R7J5	0.000491556	0	1.30992e-05	1.20984e-05
UniRef90_A0A377YWP7	0.00050083	0	5.04086e-06	1.00733e-05
UniRef90_A0A1X9QAF0	0.000491556	0	9.74729e-06	1.45698e-05
UniRef90_A8S7U8	0.000474	0	2.32383e-05	1.84469e-05
UniRef90_A0A367GIU8	0	0.000513634	2.2359e-07	0
UniRef90_D1JNR6	0	0	0.000346386	0.0001673
UniRef90_A0A0E1CHS7	0	0	0.000172829	0.000340772
UniRef90_A5KNG3	0	0	0.00027348	0.000240038
UniRef90_W6PL08	0	0	0.000271668	0.000241596
UniRef90_A0A396FMB9	0	0	0.000317962	0.000195194
UniRef90_A0A015W8P0	0	0	0.000274188	0.000238884
UniRef90_C8T635	0	0	0.000158519	0.000353918
UniRef90_A0A232GPX4	0.000262812	0	8.20398e-05	0.000167167
UniRef90_A0A017NF24	0	0	0.000323058	0.000188376
UniRef90_B5XRG2	0	0	0.000166241	0.000344792
UniRef90_A0A3E2TBV7	0.000482618	0	1.46659e-05	1.35333e-05
UniRef90_A0A076IUM6	0.00047827	0	1.47033e-05	1.74472e-05
UniRef90_A0A1C3PUC8	0	0.00039422	4.11464e-05	7.50158e-05
UniRef90_D1JTV9	0	0	0.000306652	0.000203514
UniRef90_B0GAB5	0	0.000298642	0.000119957	9.11692e-05
UniRef90_A0A017NF18	0	0	0.000353846	0.000155368
UniRef90_A0A396G2K4	0	0.00036743	8.43791e-05	5.6367e-05
UniRef90_A0A174UCP1	0	0.000495474	6.89544e-06	4.92044e-06
UniRef90_A0A0T5XIC5	0	0.000360676	5.49572e-05	9.13213e-05
UniRef90_A0A396G4X1	0	0	0.000290374	0.000216286
UniRef90_Q650G6	0.00041475	0	4.60428e-05	4.5705e-05
UniRef90_A0A373UA66	0.000506136	0	0	0
UniRef90_D4L142	0.00047913	0	1.56789e-05	1.01704e-05
UniRef90_A0A3E2V1T3	0	0	0.000260746	0.000242894
UniRef90_D1JWX0	0	0	0.000284908	0.0002179
UniRef90_A0A333FXH5	0	0	0.000172655	0.000329938
UniRef90_J2DFU5	0	0	0.000170874	0.000330668
UniRef90_A0A069SJD9	0	0	0.000148584	0.000352322
UniRef90_A0A2X3CYD2	0	0	0.000167023	0.000333734
UniRef90_A0A2N5AGZ8	0	0	0.000177161	0.00032313
UniRef90_A0A1S8YF29	0	0	0.00019623	0.00030387
UniRef90_J7TUV6	0	0	0.00027666	0.000223416
UniRef90_A0A174WXJ6	0	0.000460948	2.39966e-05	1.46008e-05
UniRef90_P0A1U7	0	0.000359356	4.54768e-05	9.42461e-05
UniRef90_A0A1H7S5P7	0	0.000480902	7.96878e-06	9.9591e-06
UniRef90_J2E6J4	0	0	0.000196603	0.000302188
UniRef90_Q5LFP7	0	0	0.00029716	0.000200752
UniRef90_A0A395VET6	0	0	0.00024331	0.000254298
UniRef90_A0A174B451	0.000457656	0	2.42466e-05	1.53296e-05
UniRef90_D1JNC8	0.000457656	0	2.11886e-05	1.81837e-05
UniRef90_A0A174YBK6	0	0.000337126	9.21624e-05	6.73594e-05
UniRef90_A0A0P0L9E5	0	0.000463942	1.45945e-05	1.70677e-05
UniRef90_A0A139KAN5	0	0	0.000347152	0.000148395
UniRef90_A0A174DPY8	0.000388776	0	5.99078e-05	4.67644e-05
UniRef90_C7H7M1	0	0	0.000240836	0.000253544
UniRef90_A0A348T1M3	0	0.0004893	3.28964e-06	0
UniRef90_A0A2N4VUE2	0	0	0.000175942	0.000315126
UniRef90_A8SGN6	0	0.00044191	2.71828e-05	2.1579e-05
UniRef90_C0BCE2	0	0.000380248	6.84868e-05	4.0757e-05
UniRef90_A0A1S9BR52	0	0	0.000148473	0.000340996
UniRef90_G2T4T7	0.000474	0	8.25072e-06	6.76946e-06
UniRef90_A0A378BAD1	0	0.00043028	1.88238e-05	3.95203e-05
UniRef90_A0A1L5KF83	0	0.00048862	0	0
UniRef90_P0AF94	0.000336	0	5.34872e-05	9.88081e-05
UniRef90_H3K4K6	0	0	0.000306792	0.000181334
UniRef90_A0A2Y0QZH5	0	0	0.000208065	0.000277136
UniRef90_A0A174PWT3	0	0	0.000268228	0.00021618
UniRef90_A0A378AEK7	0.000393244	0	2.90959e-05	6.08639e-05
UniRef90_A0A0J8Z370	0	0.000476232	6.62136e-06	0
UniRef90_A0A173SYJ2	0	0.000480902	0	2.76592e-07
UniRef90_V8BWI9	0.000402182	0	4.86036e-05	2.94156e-05
UniRef90_A0A367G9I9	0.0004424	0	1.9523e-05	1.80899e-05
UniRef90_I0Q070	0.000474	0	2.29706e-06	1.40429e-06
UniRef90_V0AT41	0.000340308	0	4.83474e-05	8.8507e-05
UniRef90_A0A139LNU5	0	0	0.000238914	0.0002382
UniRef90_A0A377TSU4	0	0.000476232	0	0
UniRef90_D4V993	0	0	0.000256636	0.000218662
UniRef90_R7NWM3	0.000444872	0	1.35255e-05	1.66365e-05
UniRef90_B0MWI4	0	0.000460582	9.86558e-06	4.05498e-06
UniRef90_A5ZTV8	0	0	0.000302904	0.000171207
UniRef90_A0A1D3KU90	0	0	0.000183222	0.000290524
UniRef90_W9BA09	0	0	0.000150328	0.000323386
UniRef90_A0A0E1CEL4	0	0	0.000162523	0.000310574
UniRef90_R5XXI6	0	0.000438944	2.1322e-05	1.14213e-05
UniRef90_A0A345AMV0	0	0	0.000160994	0.00031046
UniRef90_W9BJA3	0	0	0.000222032	0.000249098
UniRef90_U2DM71	0.000453422	0	9.27965e-06	7.30768e-06
UniRef90_A0A173ZG98	0	0.000454184	9.48794e-06	6.19093e-06
UniRef90_A0A174U8J5	0.000457656	0	5.3111e-06	6.76778e-06
UniRef90_A0A3C1T7I1	0.000468424	0	6.26554e-07	0
UniRef90_A0A377ZUR3	0	0.000462754	2.24766e-06	2.56542e-06
UniRef90_A0A3E4HP77	0	0.00044191	1.16194e-05	1.33954e-05
UniRef90_H3KB90	0.000312288	0	8.60998e-05	6.8258e-05
UniRef90_A0A1D3KTF1	0	0.00037516	3.24294e-05	5.8579e-05
UniRef90_A0A0E1CMA4	0	0	8.5411e-05	0.00038065
UniRef90_A0A0H3GX98	0	0	0.000186089	0.000279856
UniRef90_A0A396EAJ4	0.000368666	0	9.68744e-05	0
UniRef90_A0A2X3EX98	0.00046304	0	3.6815e-07	9.53186e-07
UniRef90_C7H248	0	0	0.00024145	0.000222504
UniRef90_A0A174B8Z8	0.000402182	0	3.6388e-05	2.50966e-05
UniRef90_Q64U95	0	0	0.0002782	0.000185332
UniRef90_R6TP50	0.000449899	0	9.43807e-06	4.18936e-06
UniRef90_A0A149NC57	0	0	0.00027826	0.000185086
UniRef90_A0A174Y059	0	0.000462754	1.87305e-07	1.3294e-07
UniRef90_A0A378A842	0.000323708	0	4.65938e-05	9.25538e-05
UniRef90_R7QY53	0	0.000462754	0	0
UniRef90_A0A2K4P389	0	0	0.000178929	0.000283622
UniRef90_P0ADE0	0	0	0.000160761	0.000301432
UniRef90_V0ATN0	0	0	0.000192619	0.000269376
UniRef90_B0MYL7	0.0004424	0	1.47775e-05	4.36754e-06
UniRef90_A0A015V3U5	0	0	0.000247208	0.000214176
UniRef90_UPI000CD5703B	0	0	0.000145092	0.000315894
UniRef90_A0A1D3KK65	0	0	0.000160983	0.000298028
UniRef90_A0A139T0I3	0	0	0.000283494	0.00017523
UniRef90_C7H854	0	0	0.000256514	0.00020218
UniRef90_A0A377Z4P6	0	0.000371606	2.90794e-05	5.76828e-05
UniRef90_A0A078R5Y0	0	0	0.00025862	0.000199433
UniRef90_A0A0M6WCS4	0.000457656	0	0	2.56508e-07
UniRef90_E5USC1	0.000432782	0	1.21302e-05	1.21504e-05
UniRef90_A0A396A187	0.0003792	0	4.87034e-05	2.90942e-05
UniRef90_R7B8I5	0	0.000455238	0	0
UniRef90_E4VZT6	0.00041475	0	2.41376e-05	1.55547e-05
UniRef90_C7H1V1	0	0	0.000237728	0.000216552
UniRef90_Q64NR5	0.000424253	0	1.78222e-05	1.20204e-05
UniRef90_B6W0Q3	0.000441178	0	6.87344e-06	5.90716e-06
UniRef90_D4L152	0	0.000398796	3.3814e-05	2.07902e-05
UniRef90_A9KJM3	0	0	0.000118075	0.000335279
UniRef90_A0A174NV69	0	0	0.000229718	0.000221708
UniRef90_C7H5W6	0.00041475	0	1.60779e-05	2.04188e-05
UniRef90_F3BBK2	0	0.000445101	3.30174e-06	2.17034e-06
UniRef90_C7H6T9	0.000202638	0.000134145	6.51375e-05	4.85958e-05
UniRef90_A7ZQ49	0.000402182	0	1.83509e-05	2.96512e-05
UniRef90_B0MZ65	0	0.00043028	1.53038e-05	4.37576e-06
UniRef90_F7LT05	0	0	0.000202034	0.000247808
UniRef90_A0A174TBP8	0	0.000440918	4.87256e-06	3.84254e-06
UniRef90_B0GAM1	0	0	0.000225342	0.000223472
UniRef90_B0G760	0.000438744	0	6.62612e-06	2.58046e-06
UniRef90_A0A3A5Q155	0.000447372	0	0	0
UniRef90_W1DDK6	0	0	0.00013735	0.000310008
UniRef90_A0A210UWZ9	0	0	0.000154881	0.000292438
UniRef90_E5XGV2	0.000435744	0	1.08576e-05	0
UniRef90_A0A1Q6F4G0	0.00042813	0	1.22652e-05	5.2429e-06
UniRef90_A0A378BD10	0	0	0.000146861	0.000298128
UniRef90_A0A174EHI3	0	0.000436018	4.16395e-06	4.34284e-06
UniRef90_W1ER09	0.000437538	0	6.49048e-06	0
UniRef90_D4K1G2	0	0	0.000143623	0.000300354
UniRef90_R9I4W2	0.000437538	0	3.4061e-06	8.51346e-07
UniRef90_UPI0003B4B9B1	0.000404224	0	3.7294e-05	0
UniRef90_D4J6Q8	0	0.000424692	8.72548e-06	7.97468e-06
UniRef90_D4M2C6	0	0	0.000276338	0.000164814
UniRef90_A0A015W4B2	0	0	0.000198969	0.000241964
UniRef90_W1HUK1	0	0	0.000172254	0.00026807
UniRef90_A0A3E5HW71	0	0	0.000254065	0.000186228
UniRef90_D4M2V3	0	0	0.000288698	0.000150939
UniRef90_A0A1C3Q4K6	0.000349264	0	3.20756e-05	5.75566e-05
UniRef90_A0A174VPF1	0.000404224	0	1.74825e-05	1.69023e-05
UniRef90_F3PNT8	0.000263682	0	9.83864e-05	7.64564e-05
UniRef90_A0A139KQ26	0	0.000437964	0	0
UniRef90_R5XNY7	0	0.000416594	1.21049e-05	8.0767e-06
UniRef90_A0A378F5K9	0.000433372	0	7.2728e-07	1.75265e-06
UniRef90_A0A108TB62	0	0.000435052	1.89802e-07	5.19388e-07
UniRef90_W1E472	0	0	0.000166323	0.000269392
UniRef90_A0A2A7A132	0.00042813	0	4.17574e-06	3.29908e-06
UniRef90_A7ZTQ9	0	0	0.000116901	0.00031859
UniRef90_A0A2T1LF82	0.00028542	0	4.93406e-05	0.000100536
UniRef90_A0A1D3KMF5	0.000316	0	4.03518e-05	7.88617e-05
UniRef90_J2LPY4	0	0	0.000141173	0.00029377
UniRef90_A0A2A7A9F5	0.00042813	0	3.55834e-06	3.2411e-06
UniRef90_H3KAQ5	0.000400401	0	2.00944e-05	1.44276e-05
UniRef90_C4Z1X8	0.000412174	0	1.34908e-05	9.22667e-06
UniRef90_W8USM0	0	0	0.000169025	0.000265688
UniRef90_A0A377UBP6	0.000423574	0	6.31826e-06	4.74112e-06
UniRef90_A0A377VYW9	0.000430444	0	1.5252e-06	2.35104e-06
UniRef90_A0A1C0PBG8	0.000323708	0	3.78353e-05	7.26444e-05
UniRef90_V0AWN1	0	0	0.000125965	0.0003078
UniRef90_A0A0K0NPJ7	0	0.000419248	8.11526e-06	5.67638e-06
UniRef90_A0A336JJ51	0	0.000333686	3.35632e-05	6.57262e-05
UniRef90_A0A076J644	0.00039618	0	2.02746e-05	1.61825e-05
UniRef90_V0AI50	0	0	0.000171213	0.000261086
UniRef90_A0A1S9BNA3	0	0	0.000139556	0.00029272
UniRef90_F7LJE9	0	0	0.000260414	0.000170913
UniRef90_D1JWW9	0	0	0.000244634	0.000186491
UniRef90_R6B7H0	0.00037068	0	2.63288e-05	3.36288e-05
UniRef90_K1S2D2	0	0.00043028	2.43336e-07	0
UniRef90_A0A0B7GIF7	0	0	0.000114852	0.000315584
UniRef90_A0A0E1CGL4	0.00035392	0	2.59057e-05	5.0187e-05
UniRef90_A0A1Q6F312	0	0.00040372	1.86975e-05	7.52672e-06
UniRef90_H1DCM8	0	0.000389302	2.06766e-05	1.85034e-05
UniRef90_V0AQQ0	0	0	0.000112618	0.000315635
UniRef90_D1JUB4	0.000402182	0	1.1929e-05	1.37242e-05
UniRef90_D4V7Y3	0	0	0.000224204	0.00020315
UniRef90_B5RJV6	0	0	0.000149196	0.000277958
UniRef90_A0A174ZLV4	0	0	0.000298938	0.000127095
UniRef90_UPI00092FB475	0.000349264	0	2.71698e-05	4.88564e-05
UniRef90_R6FZV3	0.000421334	0	1.29613e-06	2.42462e-06
UniRef90_A0A377TIU1	0	0.000422408	5.25068e-07	9.63994e-07
UniRef90_A0A076J445	0.000390353	0	1.58632e-05	1.60708e-05
UniRef90_A0A2X3E7D1	0	0	0.000161582	0.00026069
UniRef90_B6FNY8	0.000421892	0	5.61178e-08	0
UniRef90_A0A139T3X4	0	0.000398796	1.20657e-05	1.07137e-05
UniRef90_A0A3E5H1E2	0.000375128	0	2.65414e-05	1.93547e-05
UniRef90_A0A395ZV44	0.000416926	0	2.34498e-06	1.15709e-06
UniRef90_A0A139T2D7	0	0	0.000270596	0.000149095
UniRef90_F7LMZ8	0	0	0.000212418	0.000206928
UniRef90_A0A396A3A5	0	0.000363348	3.34182e-05	2.25586e-05
UniRef90_A0A0B7G7B8	0	0	0.000134856	0.000283548
UniRef90_K1STP0	0.000416922	0	0	0
UniRef90_R4YAG1	0	0	0.000176814	0.000239938
UniRef90_A0A078R911	0	0	0.000211342	0.00020487
UniRef90_G7YY51	0	0	0.000187322	0.000228682
UniRef90_A0A069SDZ4	0.000372112	0	2.0616e-05	2.29344e-05
UniRef90_B0NWG2	0	0	0.000213358	0.00020206
UniRef90_A0A1C3Q1T5	0	0	0.000167667	0.000247482
UniRef90_A0A2R4PGF7	0	0	0.000148651	0.000266026
UniRef90_C9LMZ5	0.000411536	0	1.37909e-06	1.64364e-06
UniRef90_A0A1T4Y6W0	0.000408894	0	4.40184e-06	8.69938e-07
UniRef90_A0A292SXH1	0	0.00041394	9.0096e-08	0
UniRef90_A5ZUA7	0	0.00039558	1.04757e-05	7.83214e-06
UniRef90_R7ND33	0	0	0.000263684	0.000149219
UniRef90_A0A074JJQ4	0.00040837	0	2.28906e-06	2.1028e-06
UniRef90_A0A1S8YFI6	0	0	0.000143805	0.000268831
UniRef90_A0A378BY77	0	0.000412202	0	0
UniRef90_A0A173TH33	0.000386564	0	1.5408e-05	1.0184e-05
UniRef90_A0A2X4Z683	0.000412068	0	0	0
UniRef90_A0A2U0MC95	0	0	0.000161593	0.000250008
UniRef90_A0A378NRW3	0	0.000398796	5.76702e-06	6.8896e-06
UniRef90_C4L7T7	0	0.000375878	1.37065e-05	2.09624e-05
UniRef90_A0A1D3U4E4	0	0.000294606	4.0956e-05	7.47394e-05
UniRef90_A0A069SLF0	0	0	0.000316338	9.37456e-05
UniRef90_A0A174XTV0	0.00040194	0	4.18894e-06	3.47412e-06
UniRef90_C9YME1	0	0.000327014	4.45068e-05	3.80348e-05
UniRef90_A0A1V2T2M3	0	0	0.000135375	0.000273936
UniRef90_G1ULU0	0.000402182	0	4.41754e-06	2.34018e-06
UniRef90_A0A328LTK8	0	0.000408766	0	0
UniRef90_A0A173YRY8	0	0	0.00023488	0.000173792
UniRef90_R5ZDS4	0	0	0.000239571	0.000168891
UniRef90_A0A139T4I5	0	0	0.000214592	0.000193466
UniRef90_A0A081TPM3	0	0.000351628	3.00475e-05	2.62105e-05
UniRef90_A0A1C3PIE1	0	0	0.000172364	0.000235183
UniRef90_A0A069SCD6	0	0	0.000140455	0.00026662
UniRef90_A0A0E2T6F1	0	0	0.000217748	0.000189277
UniRef90_A0A174YD37	0.00038742	0	1.16755e-05	7.911e-06
UniRef90_A0A377VXC7	0	0.000371606	1.13021e-05	2.40928e-05
UniRef90_A0A1C3PVE8	0	0	0.000117416	0.00028952
UniRef90_A0A174VQW4	0.0003996	0	3.84914e-06	3.1458e-06
UniRef90_A0A1D3KKU9	0.0002528	0	4.99222e-05	0.000103404
UniRef90_A0A0E1C710	0	0	0.000141921	0.00026347
UniRef90_K1SDN1	0.000405338	0	0	0
UniRef90_A0A174FIN2	0.000371246	0	2.05808e-05	1.34871e-05
UniRef90_D4IM70	0.000387504	0	9.89582e-06	7.61836e-06
UniRef90_A0A139T544	0	0	0.000225132	0.000179751
UniRef90_B2VES2	0.000226402	0	5.85789e-05	0.000119864
UniRef90_B7B9R9	0	0	0.000202006	0.000201604
UniRef90_D1JRU7	0	0	0.000283056	0.00012054
UniRef90_A0A395ZX94	0.000349264	0	3.38916e-05	2.02024e-05
UniRef90_A0A329USA6	0.000402182	0	4.7656e-07	6.5933e-07
UniRef90_A0A069S6U9	0	0	0.000184098	0.000218796
UniRef90_UPI000A1760FC	0.000396674	0	1.56563e-06	4.25588e-06
UniRef90_A0A0P0LII2	0.00036116	0	2.08624e-05	2.04026e-05
UniRef90_C7H225	0	0	0.000191597	0.000210656
UniRef90_A0A173UFF0	0	0.000389302	9.05644e-06	3.5784e-06
UniRef90_A0A377UPQ1	0	0.000371608	1.07712e-05	1.91638e-05
UniRef90_D4V689	0	0	0.000109731	0.000291708
UniRef90_UPI0009B6EEAD	0	0.000400424	0	0
UniRef90_D0TEZ3	0	0.000389302	6.86892e-06	3.49262e-06
UniRef90_A0A396B9Q1	0.000368666	0	1.66029e-05	1.41946e-05
UniRef90_D1JW46	0	0	0.000215366	0.000183501
UniRef90_C8TB52	0	0	0.000128431	0.000269122
UniRef90_K1TKI9	0.00039717	0	0	0
UniRef90_UPI000543DDA0	0.00027414	0	4.44022e-05	7.86264e-05
UniRef90_J2DQ96	0	0	0.000157554	0.000239248
UniRef90_W1HNL9	0.00039618	0	2.13528e-07	0
UniRef90_Q6U5K3	0	0	0.000170235	0.000225934
UniRef90_A5KPF8	0	0	0.000236972	0.000159129
UniRef90_V0AV96	0	0	0.000129944	0.000264872
UniRef90_R7D9R0	0	0.000389302	2.70248e-06	2.43846e-06
UniRef90_A8S630	0	0	0.000216708	0.000176787
UniRef90_A0A0K2HLZ6	0.0003792	0	9.8138e-06	4.45446e-06
UniRef90_P0A1N7	0	0.00026372	4.75158e-05	8.16762e-05
UniRef90_E4VR68	0.0003792	0	7.62556e-06	4.85222e-06
UniRef90_Q1WS97	0	0.000371606	8.80092e-06	1.09929e-05
UniRef90_Q8VRK6	0	0	0.000241021	0.000150343
UniRef90_D7J750	0.000301636	0	4.27056e-05	4.64834e-05
UniRef90_D1JS13	0	0	0.000227518	0.000163129
UniRef90_D4IJA5	0.000368666	0	1.18338e-05	9.96766e-06
UniRef90_A0A1S8YC63	0	0	0.000156263	0.000234168
UniRef90_B7MDA3	0.000288522	0	3.8184e-05	6.35985e-05
UniRef90_A0A271TVU9	0.0003792	0	3.37526e-06	7.5366e-06
UniRef90_Q6U5J1	0	0	0.000114438	0.000275218
UniRef90_D4JD86	0	0.000389302	0	0
UniRef90_K8AWG5	0	0	0.000116491	0.00027144
UniRef90_A0A0E1CCL0	0	0	0.000180264	0.000207453
UniRef90_A0A2X3CIA3	0	0.00037668	4.21378e-06	6.64122e-06
UniRef90_A0A176UAD5	0	0.000310654	4.82006e-05	2.84326e-05
UniRef90_A0A367GEV0	0	0.000314436	7.27706e-05	0
UniRef90_E5XDM8	0	0	0.000203382	0.000183504
UniRef90_R5UBJ0	0	0.000347886	2.35543e-05	1.51152e-05
UniRef90_E5XIK9	0.00035392	0	1.86918e-05	1.3356e-05
UniRef90_A8SCH0	0	0.000347886	2.19602e-05	1.57499e-05
UniRef90_K1TUF0	0.000385394	0	0	0
UniRef90_A0A1D3U5U2	0.000271968	0	3.70963e-05	7.63126e-05
UniRef90_A0A015W715	0.000385316	0	0	0
UniRef90_A0A174LG03	0	0	0.000228522	0.000155863
UniRef90_A5KN07	0	0	0.000244472	0.000139254
UniRef90_A0A076J4U3	0	0.000340638	2.14824e-05	2.06378e-05
UniRef90_D4IJU5	0.000368666	0	7.513e-06	6.47032e-06
UniRef90_D4JD40	0.000270858	0	6.2801e-05	4.86758e-05
UniRef90_E4VYZ4	0.000375622	0	2.93428e-06	3.65498e-06
UniRef90_I9FYQ4	0	0.000347886	1.73202e-05	1.68243e-05
UniRef90_A0A0E2STR1	0	0	0.000216578	0.000165287
UniRef90_A0A076IM16	0	0.000333686	2.48116e-05	2.304e-05
UniRef90_A6TH13	0.000192348	0	6.00563e-05	0.000128909
UniRef90_D4KNX8	0	0	0.000205224	0.000176056
UniRef90_A0A2A2STI8	0	0.000313972	2.10548e-05	4.61218e-05
UniRef90_A0A3E4UNS3	0	0	0.000233352	0.000147569
UniRef90_UPI000E4CED95	0.0003792	0	8.62872e-07	0
UniRef90_A0A015VVR2	0	0	0.000207092	0.000172671
UniRef90_A0A2I8XZW2	0	0	0.000147646	0.00023188
UniRef90_A0A367NZR7	0	0	0.000223682	0.000155841
UniRef90_J2DJH1	0	0	0.000136312	0.00024291
UniRef90_A0A2K9H0N1	0	0	0.000171812	0.000207384
UniRef90_A0A356I4G5	0.00036341	0	1.14158e-05	3.91682e-06
UniRef90_A0A329UXC3	0	0	0.000224538	0.000153648
UniRef90_A0A174S2T1	0	0.000252162	7.855e-05	4.72779e-05
UniRef90_A0A016C0B2	0	0.00035545	1.10798e-05	1.13738e-05
UniRef90_B7AVD2	0	0.000371606	4.39232e-06	0
UniRef90_A0A1H8FMZ7	0.000375622	0	0	0
UniRef90_UPI0009EB4611	0	0.00036606	9.54426e-06	0
UniRef90_Q5JBI5	0	0	0.000115021	0.000260531
UniRef90_R6A2N3	0.000371246	0	1.93738e-06	1.98497e-06
UniRef90_A0A174VYE8	0.000374742	0	0	0
UniRef90_E5XE28	0	0.000333686	2.67446e-05	1.40449e-05
UniRef90_C7XAK9	0	0.000374442	0	0
UniRef90_A0A069S6F5	0	0	0.000256588	0.000117808
UniRef90_C5B9D7	0	0	0.000109102	0.000264868
UniRef90_UPI0009F945D2	0.00037386	0	0	0
UniRef90_A0A351R5K2	0.000358702	0	1.00277e-05	4.39464e-06
UniRef90_R7GW94	0.000368666	0	1.27008e-06	2.77738e-06
UniRef90_J2LNW3	0	0	0.000129833	0.000242234
UniRef90_W1H2K7	0.000232842	0	4.89302e-05	8.95168e-05
UniRef90_A0A0K9NB76	0.000292702	0	4.35402e-05	3.47602e-05
UniRef90_A0A074TVW8	0.000370382	0	0	0
UniRef90_A0A156CR33	0	0.000360676	9.57968e-06	0
UniRef90_P45599	0.000262812	0	4.16758e-05	6.57556e-05
UniRef90_C4Z9X7	0.000358702	0	6.63176e-06	4.87716e-06
UniRef90_A0A015Z3V5	0	0	0.000221674	0.000148439
UniRef90_A0A2X1QET3	0.00036424	0	1.95261e-06	3.6616e-06
UniRef90_E5XG99	0	0	0.00026713	0.000102341
UniRef90_A0A1Q6FAU5	0	0.00035545	9.46852e-06	3.60744e-06
UniRef90_UPI000DE5BF94	0	0.000363348	4.8699e-06	0
UniRef90_UPI000EFE9D94	0	0.000368122	0	0
UniRef90_R5MXZ2	0.000297552	0	3.65356e-05	3.39636e-05
UniRef90_A0A174BRY3	0	0.00035545	4.68946e-06	7.62506e-06
UniRef90_A0A0E2RTP0	0	0.000333686	1.96203e-05	1.4075e-05
UniRef90_Q2NQP8	0.000336	0	1.15177e-05	1.93983e-05
UniRef90_B5XPD1	0	0	0.000184294	0.000182585
UniRef90_A6L0W2	0.000329058	0	1.78803e-05	1.96242e-05
UniRef90_A0A1D3KT64	0.000296132	0	2.44809e-05	4.58303e-05
UniRef90_E5XJ89	0	0	0.000185593	0.000180804
UniRef90_C0ERV8	0.000363616	0	1.77512e-06	9.39874e-07
UniRef90_G8FXJ6	0.000278512	0	5.31558e-05	3.44458e-05
UniRef90_A0A078R7D6	0	0	0.000201784	0.000164286
UniRef90_A0A015V3R2	0.00036424	0	8.7001e-07	8.164e-07
UniRef90_A0A3E4UH23	0	0.00035545	4.90656e-06	5.21367e-06
UniRef90_J2E5C6	0	0	0.000133097	0.000232472
UniRef90_A0A081TPP8	0.000316	0	2.3938e-05	2.46126e-05
UniRef90_A0A2A7ACG4	0	0	0.000183685	0.000180848
UniRef90_A0A372PPA4	0	0	0.00013206	0.000232448
UniRef90_V0B2C3	0	0	0.000129184	0.000235072
UniRef90_F0YTL3	0	0.000291976	4.99223e-05	2.22044e-05
UniRef90_B0P4W6	0.000358702	0	2.81832e-06	2.44496e-06
UniRef90_H3K7D4	0.000340308	0	1.46006e-05	8.90948e-06
UniRef90_A0A1S8Y4D3	0	0	0.000130919	0.000232884
UniRef90_R9IUA5	0.000358702	0	2.49658e-06	2.24232e-06
UniRef90_D7IKM7	0	0	0.000189341	0.000173929
UniRef90_D6E1W7	0.000358702	0	2.56386e-06	1.71449e-06
UniRef90_A0A378FTP2	0	0.000333686	1.04815e-05	1.85889e-05
UniRef90_A0A2A5PPF3	0	0.000362454	0	0
UniRef90_R7D6A4	0.000358702	0	1.8741e-06	1.7297e-06
UniRef90_A0A2A6ZWG6	0	0.00035545	3.86826e-06	2.60054e-06
UniRef90_A8S5Y6	0.00033092	0	1.54332e-05	1.55611e-05
UniRef90_V0B3Y0	0	0	0.000102285	0.00025953
UniRef90_R7JL64	0.00034585	0	1.2477e-05	3.2818e-06
UniRef90_R6EWY5	0	0.00035545	6.11134e-06	0
UniRef90_A0A016E3U5	0	0	0.000225132	0.000135987
UniRef90_C7HAG3	0	0	0.00020577	0.000155131
UniRef90_A0A3E4XFF5	0	0	0.000187296	0.000173264
UniRef90_D1JTG8	0	0	0.000196309	0.000164221
UniRef90_A0A396E651	0.000312262	0	2.49868e-05	2.31382e-05
UniRef90_A0A173SCM1	0.000349264	0	7.14224e-06	3.81156e-06
UniRef90_A0A377ZKB0	0.000358702	0	3.84734e-07	1.10977e-06
UniRef90_A8S881	0	0	0.000148617	0.000211566
UniRef90_I0QGR4	0	0.00035545	2.90376e-06	1.82865e-06
UniRef90_A0A174MSW4	0	0.00035545	2.52668e-06	1.82139e-06
UniRef90_A0A139KPT2	0	0.00027434	4.60148e-05	3.9192e-05
UniRef90_A0A076IPC3	0.000323708	0	1.60952e-05	1.96433e-05
UniRef90_D4J5W6	0.000282384	0	4.48494e-05	3.18938e-05
UniRef90_H3K7Y4	0	0	0.000215828	0.000143292
UniRef90_A0A1D3KFF4	0	0	0.000157982	0.000200976
UniRef90_A0A395V7T5	0.00026544	0	5.76928e-05	3.56351e-05
UniRef90_A0A2X3CZG6	0	0	9.16598e-05	0.000266872
UniRef90_A6BCK7	0	0	9.95988e-05	0.000258544
UniRef90_A0A3A1N1E0	0	0.000251548	3.79002e-05	6.8623e-05
UniRef90_A0A139T5Q9	0	0	0.000226638	0.000130849
UniRef90_A0A0I9S7I6	0.0003318	0	1.46011e-05	1.09423e-05
UniRef90_A0A076J1V2	0	0.000344224	6.86818e-06	5.8351e-06
UniRef90_A0A0P0M3Z0	0.0002212	0	6.72133e-05	6.8284e-05
UniRef90_W1GLY7	0	0	0.000119049	0.000236244
UniRef90_J7SHX6	0	0	0.00018068	0.000174444
UniRef90_C7H7D3	0	0	0.000174928	0.000180154
UniRef90_A0A0P0FCT4	0	0	0.000185057	0.000169888
UniRef90_C0FR34	0	0	0.000241936	0.000112982
UniRef90_A0A174F692	0.000354314	0	0	0
UniRef90_R5MHR3	0.000311672	0	2.34092e-05	1.89099e-05
UniRef90_R6IAG1	0	0.000340638	8.68282e-06	4.1171e-06
UniRef90_A0A378FUC4	0.000332724	0	6.73794e-06	1.39526e-05
UniRef90_Q6U5J7	0	0	0.000122003	0.000231252
UniRef90_B5CNT5	0.000294934	0	3.55446e-05	2.20868e-05
UniRef90_A0A395WKI4	0.000323708	0	1.53246e-05	1.2993e-05
UniRef90_B0MWF0	0	0	0.000298938	5.23946e-05
UniRef90_A0A0T5XMJ5	0.000257084	0	3.41672e-05	5.96978e-05
UniRef90_A0A377UJK5	0	0	0.000131896	0.000218992
UniRef90_C2ERT0	0	0.000347886	2.98944e-06	0
UniRef90_F7LN78	0.000327704	0	1.31368e-05	9.77868e-06
UniRef90_E1WTG3	0	0	0.000224686	0.000125673
UniRef90_H3K8D3	0.000319808	0	1.68822e-05	1.34264e-05
UniRef90_A0A377TQF6	0	0	0.000135493	0.00021461
UniRef90_V0ALA6	0	0	9.85592e-05	0.000251016
UniRef90_A0A378DIW1	0	0.000333686	5.9202e-06	9.53918e-06
UniRef90_A7AGV6	0.000345476	0	1.29289e-06	2.04632e-06
UniRef90_A0A3D0EEA3	0	0.000348044	7.68186e-07	0
UniRef90_A0A078SA59	0	0.00030562	1.91083e-05	2.40686e-05
UniRef90_A0A174T1G6	0	0.000344224	2.24766e-06	2.1532e-06
UniRef90_A0A377UMC5	0	0	0.000112956	0.000235466
UniRef90_F7K291	0	0.000348162	1.46503e-07	0
UniRef90_Q5LXM5	0	0	0.000107048	0.000240954
UniRef90_W1DY13	0	0.00024404	3.51222e-05	6.86961e-05
UniRef90_A0A173T9I8	0.000301636	0	1.90783e-05	2.67102e-05
UniRef90_A0A1H5W0G6	0	0	0.000119855	0.000227563
UniRef90_A0A015YKJ7	0.0003318	0	7.6514e-06	7.88642e-06
UniRef90_A0A285BA83	0.000340308	0	6.88036e-06	0
UniRef90_A0A1Q6QU34	0	0	0.000208478	0.000138572
UniRef90_A0A174HA64	0	0.000329762	9.86382e-06	6.99918e-06
UniRef90_E1KPU4	0	0.000329208	1.71509e-05	0
UniRef90_A0A1Q6TGL1	0.000346226	0	0	0
UniRef90_A0A0M6WQF0	0.0003318	0	7.9833e-06	6.28535e-06
UniRef90_E5XHP4	0	0	0.000188169	0.000157738
UniRef90_B5XND2	0	0	0.000125971	0.000219578
UniRef90_B0NII3	0	0	0.00020851	0.000136934
UniRef90_E5XFC6	0.000316	0	1.79303e-05	1.11663e-05
UniRef90_E1YPF1	0	0	0.000218034	0.000126903
UniRef90_A0A0T5ITB7	0	0	0.000117169	0.000227226
UniRef90_A0A1C5VJ47	0.000337196	0	6.8558e-06	0
UniRef90_A0A078PXC7	0	0	0.00023161	0.000112201
UniRef90_A0A0E2T2B8	0	0	0.000206358	0.000135422
UniRef90_A0A2N4YPC5	0	0	0.000128798	0.000212934
UniRef90_A0A367GA22	0.0003318	0	5.82514e-06	3.27612e-06
UniRef90_A0A1D3U2L5	0	0.000262662	2.63572e-05	5.14015e-05
UniRef90_A0A078RIT0	0	0	0.000140065	0.000200272
UniRef90_R5ZR15	0.000340308	0	0	0
UniRef90_A0A0N7J738	0.000316	0	9.73095e-06	1.36514e-05
UniRef90_D4M2U3	0	0	0.000181498	0.000157695
UniRef90_A0A2X3GQ51	0	0.000335972	4.4485e-07	2.05022e-06
UniRef90_K1U893	0.00033832	0	0	0
UniRef90_V0AN92	0	0	0.000117893	0.000220426
UniRef90_R6D0E4	0	0.000333686	2.90318e-06	1.60423e-06
UniRef90_Q55055	0	0.000323242	6.68772e-06	8.03514e-06
UniRef90_A0A0M3H6J1	0	0	0.000120227	0.00021748
UniRef90_Q64WT7	0	0	0.000172246	0.000164761
UniRef90_R5DFP3	0.000336	0	0	9.34962e-07
UniRef90_A5KR91	0	0	0.000206022	0.000130804
UniRef90_A0A1S8YCP8	0	0	0.000105004	0.000231754
UniRef90_A0A2J3DNC6	0	0	0.000149674	0.000186385
UniRef90_A0A0I9RPL2	0	0.000323776	6.39958e-06	5.86158e-06
UniRef90_A0A1S8YFH0	0	0	0.000134204	0.00020182
UniRef90_A0A246AVS2	0	0	0.000112767	0.000222798
UniRef90_F4XCM8	0	0.000333686	1.67121e-06	0
UniRef90_H3K8A3	0	0	0.00020058	0.000134683
UniRef90_A6L3K7	0	0.000304244	1.44077e-05	1.62465e-05
UniRef90_R9HMD8	0	0	0.000138793	0.000195951
UniRef90_A0A0E2T9N7	0	0	0.000137504	0.000197069
UniRef90_A0A0E2TEX3	0	0	0.0002202	0.000114184
UniRef90_R9HLK2	0	0.00026372	3.56172e-05	3.47172e-05
UniRef90_A6BF00	0	0	0.000200232	0.000133267
UniRef90_A0A3E5FH37	0.000308652	0	1.49317e-05	9.82094e-06
UniRef90_A8SDX7	0.000323708	0	6.7704e-06	2.77022e-06
UniRef90_A0A3E2V1V9	0	0	0.00019486	0.000138383
UniRef90_UPI000E4747D0	0.000333188	0	0	0
UniRef90_R5RRW5	0.000333188	0	0	0
UniRef90_A0A2J5QHN1	0	0	0.000117701	0.000215089
UniRef90_A0A2A7AHN8	0.000282384	0	2.53638e-05	2.40436e-05
UniRef90_A0A174JAX0	0	0.000327014	2.27762e-06	2.24836e-06
UniRef90_A0A377TRS8	0	0	0.00011507	0.000216352
UniRef90_A0A015SM34	0	0	0.000150656	0.000180752
UniRef90_D4JMT5	0	0	0.00018544	0.000145474
UniRef90_A0A015RSN7	0	0.000297284	1.8385e-05	1.48859e-05
UniRef90_R6QAB7	0.000330082	0	0	0
UniRef90_A0A015XI53	0	0	0.000163346	0.000166324
UniRef90_A0A174XJS5	0.000316	0	9.23524e-06	4.25042e-06
UniRef90_W1GY10	0	0	0.000140859	0.000188552
UniRef90_A0A241QMH4	0	0	0.000120691	0.00020807
UniRef90_A0A0K6C0K7	0	0.000289392	2.13986e-05	1.78403e-05
UniRef90_A0A377UM26	0	0.000327014	8.5411e-07	4.83642e-07
UniRef90_R6P8B5	0.000326194	0	9.63292e-07	1.16372e-06
UniRef90_R7D6S8	0	0.000323776	1.95206e-06	2.37838e-06
UniRef90_A0A015XD47	0	0	0.00017616	0.000151558
UniRef90_E2ZHD0	0	0.000327016	0	1.00257e-07
UniRef90_A0A1H8DSK2	0	0.000327014	0	0
UniRef90_J9GIN0	0	0.000327014	0	0
UniRef90_D1JUU8	0	0	0.00022196	0.000104857
UniRef90_A0A3E2V110	0	0	0.000181498	0.000145248
UniRef90_A0A015SWD5	0	0	0.000165616	0.000161077
UniRef90_Q5LC93	0	0	0.00018399	0.000142487
UniRef90_A0A378AAQ3	0.000325028	0	2.90514e-07	3.47244e-07
UniRef90_D1K197	0	0	0.000138793	0.000186656
UniRef90_A5KMP9	0	0	0.000220476	0.000104945
UniRef90_D4IM13	0.000308652	0	9.49144e-06	7.19868e-06
UniRef90_A0A1C3PIL9	0.0002212	0	3.39424e-05	6.97114e-05
UniRef90_D4KL83	0	0.000235262	5.4291e-05	3.5219e-05
UniRef90_A0A0J4R8Q1	0	0	0.000108397	0.00021631
UniRef90_C7H464	0	0.000300012	1.09432e-05	1.35707e-05
UniRef90_A0A1Q8Z2N1	0	0	9.16328e-05	0.000232458
UniRef90_A0A3D2AEP6	0.000308652	0	9.0681e-06	5.72914e-06
UniRef90_A0A3A1V5Q3	0	0.000308502	1.4517e-05	0
UniRef90_D1JX84	0	0	0.000171238	0.00015174
UniRef90_E5XGQ2	0	0	0.000194422	0.000128278
UniRef90_B0MXY5	0	0	0.000277312	4.52892e-05
UniRef90_A0A173XRV5	0.0002765	0	2.85712e-05	1.71692e-05
UniRef90_A0A174J8E7	0.000308652	0	8.08497e-06	5.39416e-06
UniRef90_A0A2X3D3P8	0	0	0.00010671	0.00021541
UniRef90_A0A173XQ94	0	0	0.00014938	0.000172233
UniRef90_A0A0M6WV21	0	0	0.00022464	9.67284e-05
UniRef90_W1HXH4	0	0	9.10676e-05	0.00023017
UniRef90_F6KQM9	0	0.000321126	0	0
UniRef90_A0A174HTD1	0.000293304	0	1.78555e-05	9.89548e-06
UniRef90_D1JSL6	0	0	0.000164005	0.000156798
UniRef90_UPI000488C16C	0	0.000320602	1.40479e-07	0
UniRef90_A0A376C2M3	0	0.000320602	0	0
UniRef90_A0A3E5E6S4	0	0.000222458	5.32822e-05	4.36454e-05
UniRef90_Q64QL5	0.000294934	0	1.16491e-05	1.24492e-05
UniRef90_R5XG99	0	0.000288754	1.95258e-05	1.05737e-05
UniRef90_UPI000E31FA45	0.000318528	0	1.66818e-07	0
UniRef90_A0A378BNS8	0.000316	0	8.93515e-07	1.59884e-06
UniRef90_A0A015STI3	0	0	0.000180031	0.000138436
UniRef90_D4IMS3	0	0	0.000194439	0.000123618
UniRef90_A0A017NFK7	0	0	0.000198597	0.000119414
UniRef90_D6DYV5	0.000272712	0	2.72434e-05	1.77113e-05
UniRef90_D4JD93	0	0	0.000180727	0.000136823
UniRef90_A0A069D0K7	0.000262812	0	2.99536e-05	2.42444e-05
UniRef90_A0A1G6G378	0	0.000311442	2.96896e-06	2.40984e-06
UniRef90_J2E1E4	0	0	0.000106788	0.000210016
UniRef90_A0A0E1CD00	0	0	9.8532e-05	0.000218016
UniRef90_W1HFX3	0	0.000316464	0	0
UniRef90_A0A2J1D4N5	0	0.000316464	0	0
UniRef90_D4LP75	0.000308652	0	3.64028e-06	4.03358e-06
UniRef90_C7HAU7	0	0	0.000161238	0.000155072
UniRef90_A0A0T5IUQ7	0	0	0.000114067	0.000202224
UniRef90_A0A2A7BFU7	0.00028542	0	1.54207e-05	1.53322e-05
UniRef90_R6WLB0	0.000308652	0	5.0882e-06	2.37962e-06
UniRef90_A0A015YH90	0	0	0.0001772	0.000138884
UniRef90_A0A377X7Y8	0	0	0.000112415	0.000203628
UniRef90_A0A377F568	0	0	0.000118147	0.00019737
UniRef90_D1JM62	0.000308652	0	3.4135e-06	3.44325e-06
UniRef90_A0A174I581	0	0	0.000192545	0.000122877
UniRef90_W9BCM3	0	0	0.000109166	0.00020616
UniRef90_W1H2M6	0	0	0.00011455	0.000199917
UniRef90_UPI000E4A7E77	0	0.000314436	0	0
UniRef90_W1HYZ9	0.000309852	0	1.65947e-06	2.53683e-06
UniRef90_A0A396E3U6	0	0	0.00017574	0.00013802
UniRef90_B0MXM4	0	0	0.000215906	9.7576e-05
UniRef90_J2X3W4	0	0	0.000105996	0.000207137
UniRef90_P0AGD5	0	0.000227092	3.05666e-05	5.51293e-05
UniRef90_D4L1A8	0.000301636	0	6.92238e-06	4.00422e-06
UniRef90_E5XIJ6	0	0	0.00018864	0.000123909
UniRef90_A0A015VYS4	0	0	0.000168335	0.00014406
UniRef90_H3KAD9	0	0.0002991	8.56926e-06	4.05148e-06
UniRef90_A0A2A7BFG6	0.00028542	0	1.13494e-05	1.46805e-05
UniRef90_UPI000C7B660B	0	0	0.000129107	0.000182336
UniRef90_D1JWQ4	0	0	0.000167115	0.000144264
UniRef90_A0A2J5QTV1	0	0	0.000114119	0.000197149
UniRef90_UPI0004A17B33	0.000294934	0	5.51612e-06	1.06321e-05
UniRef90_A0A3E5EAZ5	0	0	0.000170747	0.000140267
UniRef90_A0A3E2W7G5	0	0	0.000156686	0.000154281
UniRef90_A0A173WT79	0	0	0.000170822	0.000139943
UniRef90_A0A176U927	0	0	0.000179581	0.000131111
UniRef90_A0A181Y6E3	0	0	0.000101563	0.000209053
UniRef90_A0A069SE32	0.000300544	0	4.8317e-06	4.986e-06
UniRef90_A0A218N5X5	0.000205768	0	3.7162e-05	6.7399e-05
UniRef90_A0A3F3M632	0	0	9.65316e-05	0.00021375
UniRef90_K1T9W3	0	0.000309476	5.92606e-07	0
UniRef90_A0A378D100	0.000309852	0	0	0
UniRef90_A0A0E1C9T8	0.000190964	0	4.22295e-05	7.64722e-05
UniRef90_C7H849	0	0	0.000137114	0.000172486
UniRef90_C0BDI2	0	0	0.000177417	0.00013206
UniRef90_A0A174RI96	0.000297578	0	7.3026e-06	4.49634e-06
UniRef90_A0A173WLS6	0	0.00030562	1.38216e-06	2.10906e-06
UniRef90_UPI000EFFBDD4	0	0.00027251	3.5757e-05	0
UniRef90_A0A378FU72	0.00030394	0	1.94116e-06	2.2364e-06
UniRef90_A5KLY0	0	0	0.000179323	0.000127841
UniRef90_UPI0009073244	0	0	0.000106754	0.00020034
UniRef90_A0A0P0M2Q1	0.00026544	0	2.18234e-05	1.97884e-05
UniRef90_A0A2Z2EVE9	0	0.000307002	0	0
UniRef90_A0A378A526	0	0.00030467	1.35573e-06	6.18386e-07
UniRef90_D0TY31	0	0	0.000167614	0.000139
UniRef90_A0A333FTP9	0	0	0.000100069	0.000206188
UniRef90_A0A329U5S3	0.000298248	0	4.59664e-06	3.0599e-06
UniRef90_K1UGI4	0	0.00030467	8.5538e-07	0
UniRef90_A0A2X3GNZ6	0.00030525	0	0	0
UniRef90_A0A139T1J6	0	0	0.000180652	0.000124495
UniRef90_A8SE07	0	0.000294166	7.4269e-06	3.412e-06
UniRef90_A0A0M6WPT7	0.000288522	0	1.24323e-05	3.85884e-06
UniRef90_D4M244	0	0.000279498	1.65756e-05	8.57724e-06
UniRef90_B5XUJ4	0	0	0.00012349	0.000181039
UniRef90_A0A0P0L4B0	0.000278218	0	1.37435e-05	1.24772e-05
UniRef90_A6TFR0	0	0	0.000118067	0.000186286
UniRef90_F7LUT0	0	0.000290684	8.0395e-06	5.47062e-06
UniRef90_C4ZFF9	0.000211146	0	5.53212e-05	3.74844e-05
UniRef90_A0A379T9R7	0.00030394	0	0	0
UniRef90_A5KKY0	0	0	0.000188417	0.000115482
UniRef90_B6FNW2	0	0.000303728	0	0
UniRef90_A0A094ZTL4	0	0	9.06383e-05	0.000212926
UniRef90_A0A3E4HH60	0.000270858	0	1.38902e-05	1.86887e-05
UniRef90_UPI0009EC6804	0.000270858	0	3.25718e-05	0
UniRef90_A0A173RP54	0	0.000297284	3.16148e-06	2.8861e-06
UniRef90_A0A3E2UBL8	0.00026544	0	1.97141e-05	1.79547e-05
UniRef90_A0A2S0VDX0	0	0	0.000121101	0.000181848
UniRef90_A0A3E5IDB9	0	0	0.000163159	0.000139774
UniRef90_A0A1C6KC07	0.000302658	0	0	0
UniRef90_E2SIR4	0	0	0.000176532	0.000125868
UniRef90_A0A378CSG6	0	0.000297284	1.94116e-06	3.0351e-06
UniRef90_A0A016G7V3	0	0	0.000151454	0.000150803
UniRef90_B6FRK6	0	0	0.000172363	0.000129794
UniRef90_A0A2X1SCR6	0	0	0.00010636	0.000195717
UniRef90_A0A0M6WXU7	0.000213616	0	5.45875e-05	3.37429e-05
UniRef90_A0A377URL0	0.00029542	0	2.78594e-06	3.67452e-06
UniRef90_E5XGP7	0	0	0.000179176	0.000122472
UniRef90_A0A396DVP3	0.000190964	0	6.06832e-05	4.98054e-05
UniRef90_E8KWL6	0.000291692	0	4.57286e-06	4.91202e-06
UniRef90_R6Y4J2	0.000288522	0	6.44104e-06	6.19682e-06
UniRef90_F3AXP3	0	0.000300932	0	0
UniRef90_A0A377U9T4	0	0.000297284	9.7058e-07	2.47122e-06
UniRef90_B0G8U3	0	0	0.000205902	9.4348e-05
UniRef90_A0A378CSH2	0	0	0.000116036	0.000184194
UniRef90_A0A017P9J8	0	0	0.000180609	0.000119508
UniRef90_D3HAN6	0.000281346	0	1.14044e-05	7.19376e-06
UniRef90_D1JWV9	0	0	0.000192404	0.000107391
UniRef90_R5VAZ1	0.00028542	0	8.227e-06	5.50374e-06
UniRef90_H3K537	0.000270858	0	1.73001e-05	1.07635e-05
UniRef90_A0A0P0LJC0	0.000288522	0	5.1215e-06	5.07932e-06
UniRef90_D4V548	0.000282384	0	7.3534e-06	8.81948e-06
UniRef90_A0A1D3U4E8	0.000174632	0	4.11712e-05	8.23265e-05
UniRef90_A0A015S3B6	0	0	0.000178385	0.00011961
UniRef90_A0A3E4UPB9	0	0	0.000178155	0.000119808
UniRef90_A0A395VSG7	0.000288522	0	6.58502e-06	2.74874e-06
UniRef90_UPI000EF97D8D	0.000297354	0	0	3.44908e-07
UniRef90_G1ULP1	0	0	0.000181972	0.000115375
UniRef90_A0A231WSU4	0	0	0.000110405	0.000186828
UniRef90_A0A170R777	0	0	9.67418e-05	0.000200306
UniRef90_A0A174M6P1	0	0.00028602	7.58936e-06	3.41958e-06
UniRef90_A0A2A6ZDQ7	0	0.000291976	2.7813e-06	2.25306e-06
UniRef90_A0A2A7B8I8	0	0.00027251	1.2127e-05	1.17114e-05
UniRef90_A0A396GB52	0	0	0.00017007	0.000126106
UniRef90_C8TCP0	0	0	0.000101464	0.000194537
UniRef90_A0A1S8YBB6	0	0	0.000105606	0.000190367
UniRef90_S0FBR7	0	0	0.000173765	0.000122205
UniRef90_U2PKT4	0	0.00027509	1.3327e-05	7.44886e-06
UniRef90_A0A367NN12	0.0002765	0	7.41415e-06	1.19334e-05
UniRef90_B5Y0L4	0	0	9.33656e-05	0.000202446
UniRef90_UPI000A176010	0.000294934	0	1.58169e-07	6.17122e-07
UniRef90_A0A1C0WAF4	0.000270858	0	1.24488e-05	1.21906e-05
UniRef90_A0A2X3BX02	0.00029548	0	0	0
UniRef90_I3WHK0	0	0.000215102	4.8501e-05	3.17666e-05
UniRef90_C0FZI6	0	0.000285776	4.02312e-06	5.549e-06
UniRef90_E2ZJT1	0	0.000223982	3.58118e-05	3.5481e-05
UniRef90_A0A1E9BYG4	0.000294934	0	0	0
UniRef90_A0A175AAP1	0	0	0.000176123	0.000118808
UniRef90_UPI0009BFC057	0	0.00028436	1.03264e-05	0
UniRef90_V7IVU2	0	0	9.98914e-05	0.000194552
UniRef90_A7ACF2	0	0	0.000162499	0.000131828
UniRef90_A0A2N4Z847	0	0	9.46454e-05	0.000199507
UniRef90_B5XSC8	0	0	0.000101246	0.000192657
UniRef90_UPI000E53E577	0	0.000293724	0	0
UniRef90_A0A370YGW2	0	0.000293724	0	0
UniRef90_A0A3E5DKV8	0	0	0.000156816	0.000136785
UniRef90_E5XHQ7	0	0	0.000176582	0.000116709
UniRef90_A0A378NUL3	0.00017775	0	6.71088e-05	4.84284e-05
UniRef90_A0A3E5AIJ2	0	0.000279898	8.3277e-06	4.8154e-06
UniRef90_A0A3A8Z586	0.000282384	0	1.06185e-05	0
UniRef90_H3K9X3	0.000260236	0	1.95852e-05	1.31004e-05
UniRef90_W1DY15	0.000292764	0	0	0
UniRef90_A0A378H330	0	0	0.000105998	0.00018676
UniRef90_A0A1L5VA37	0	0	0.000104012	0.00018864
UniRef90_A0A3E4PKQ4	0	0.000260914	3.06576e-05	8.40128e-07
UniRef90_A0A1C3Q510	0.000174059	0	4.19994e-05	7.61754e-05
UniRef90_D4IJB0	0.000270858	0	1.21605e-05	9.02252e-06
UniRef90_R6WM04	0	0.000281908	5.3233e-06	4.37548e-06
UniRef90_H3K6D3	0	0.00027713	1.06486e-05	3.77227e-06
UniRef90_A0A076J475	0.00026533	0	1.20856e-05	1.39969e-05
UniRef90_I9QUC3	0.000254444	0	1.84513e-05	1.84547e-05
UniRef90_B6VZ22	0.00026544	0	1.19566e-05	1.35787e-05
UniRef90_R7B5Z2	0.000290628	0	3.0946e-07	0
UniRef90_A0A1D3KH17	0	0	9.6329e-05	0.000194338
UniRef90_A0A173S9W5	0.000177298	0	6.55934e-05	4.76152e-05
UniRef90_R7N6A8	0	0	0.00022097	6.92245e-05
UniRef90_V0AIX1	0	0	9.52456e-05	0.000194949
UniRef90_A5KKM7	0	0	0.000160693	0.000129302
UniRef90_A0A125MH34	0.000288658	0	6.66444e-07	2.73358e-07
UniRef90_A0A2T1LF92	0	0	0.000102076	0.000187491
UniRef90_A0A2A5MH97	0	0	0.000105458	0.000183887
UniRef90_UPI000E499347	0.000288522	0	6.35034e-07	0
UniRef90_A0A2T1LM05	0	0	0.000112484	0.000176598
UniRef90_B0G7E9	0	0	0.000202852	8.59552e-05
UniRef90_R5LWS2	0.000288522	0	0	1.16822e-07
UniRef90_C7H960	0	0	0.000113881	0.000174583
UniRef90_A0A134C6L7	0	0.000286854	4.31982e-07	1.0647e-06
UniRef90_A0A2A7B608	0.000270858	0	8.68332e-06	8.68494e-06
UniRef90_A0A139TEV9	0	0	0.000141514	0.000146629
UniRef90_A0A2A7ATM9	0.0002528	0	1.72828e-05	1.78226e-05
UniRef90_A0A0J8YZT5	0.0002844	0	3.3888e-06	0
UniRef90_L7SUY6	0	0	9.86868e-05	0.00018901
UniRef90_A0A377UQY4	0	0	9.8142e-05	0.000189398
UniRef90_D4KAT6	0.00021933	0	3.54827e-05	3.25068e-05
UniRef90_A0A395YXK2	0	0	0.000137681	0.000149429
UniRef90_A0A242VSG3	0	0	9.7542e-05	0.000189504
UniRef90_A0A220QR86	0	0.000286854	0	0
UniRef90_A0A376UFQ7	0.000193282	0	3.12922e-05	6.22305e-05
UniRef90_UPI0007D6DA87	0	0	8.4998e-05	0.00020148
UniRef90_B0G6W6	0	0	0.000165964	0.000120277
UniRef90_A0A0M6WYW5	0	0	0.000203148	8.29312e-05
UniRef90_A0A0P0FPN5	0	0.000281908	1.95265e-06	1.82551e-06
UniRef90_A0A395V083	0.000273182	0	8.61116e-06	3.85904e-06
UniRef90_C6J828	0.000278434	0	4.1002e-06	3.09886e-06
UniRef90_D4V591	0	0.000249628	1.67359e-05	1.90599e-05
UniRef90_A6T7D6	0	0.000218738	2.35696e-05	4.30006e-05
UniRef90_A0A1D3KRI7	0	0	0.000117785	0.000167421
UniRef90_H3K8A5	0	0	0.000164938	0.000119928
UniRef90_UPI0009081372	0	0	9.45182e-05	0.000190278
UniRef90_A0A378BZJ0	0	0	7.74428e-05	0.000207282
UniRef90_A0A1Q6JMY5	0.000274594	0	9.9836e-06	0
UniRef90_A0A127SC26	0.0002844	0	0	0
UniRef90_A0A1D3U5K5	0	0	9.99748e-05	0.000183865
UniRef90_D4K4K6	0.000249474	0	1.55269e-05	1.83137e-05
UniRef90_A0A2N4VXF8	0	0	9.5617e-05	0.000187602
UniRef90_R5V942	0.000180404	0	5.23988e-05	5.02298e-05
UniRef90_A0A1V7JTS5	0	0	0.000107681	0.000175283
UniRef90_UPI0006614A32	0	0	0.000107498	0.000175288
UniRef90_G2SZ75	0	0	0.000173395	0.00010919
UniRef90_I9H7Q1	0.000248074	0	1.9975e-05	1.44386e-05
UniRef90_D4RX53	0	0.000270258	6.61124e-06	4.98207e-06
UniRef90_A0A0K6BYC5	0	0	0.000170779	0.00011065
UniRef90_A0A2H9E5U6	0	0	0.000100963	0.000180277
UniRef90_V0AJ03	0	0	0.000104442	0.000175983
UniRef90_A0A017PDP3	0	0	0.000136302	0.000144036
UniRef90_A0A1Q6L9B1	0	0.00027713	3.12132e-06	0
UniRef90_B6W3Y4	0	0.000247738	1.67875e-05	1.56738e-05
UniRef90_B0MYV5	0	0.000268044	9.31482e-06	2.8202e-06
UniRef90_C7H3A4	0	0	0.000128817	0.000151332
UniRef90_A0A017NYA9	0	0	0.000139102	0.00014087
UniRef90_R6BND2	0	0.00027713	2.75398e-06	0
UniRef90_A0A1D3KP22	0	0	0.000102191	0.000177391
UniRef90_A0A3E4TPR4	0.0002765	0	1.63111e-06	9.60954e-07
UniRef90_A0A174Q0V3	0.000214064	0	4.10267e-05	2.39433e-05
UniRef90_D4LLC1	0	0.000260222	1.11337e-05	7.36604e-06
UniRef90_A0A1Q6JR81	0	0.000249628	1.39706e-05	1.50464e-05
UniRef90_A0A0K6BQI0	0.000237	0	2.29016e-05	1.8617e-05
UniRef90_J2XA24	0	0	0.000112197	0.000166255
UniRef90_A0A378G958	0.000278434	0	0	0
UniRef90_A0A015U3Z9	0	0	0.000141996	0.000136259
UniRef90_R5CX16	0.0002765	0	4.44592e-07	1.2019e-06
UniRef90_A0A2A7A8C8	0	0.000271774	3.71176e-06	2.63418e-06
UniRef90_D4LY41	0	0	0.000162552	0.000115489
UniRef90_J2DNE8	0	0	9.20506e-05	0.000185944
UniRef90_A0A1D3U2F1	0	0	7.43694e-05	0.000203528
UniRef90_A0A0K6BWB8	0.000215805	0	3.40146e-05	2.79949e-05
UniRef90_A0A0P0GH78	0.000183062	0	5.24686e-05	4.22028e-05
UniRef90_UPI000E4C46E5	0	0.000277522	0	0
UniRef90_A0A076IJF6	0	0.000265864	5.47178e-06	5.8923e-06
UniRef90_A0A3E1C5H5	0	0	6.22788e-05	0.000214648
UniRef90_A0A377XAY8	0	0.000249628	1.01542e-05	1.69548e-05
UniRef90_A0A377ZIL8	0	0	0.000129107	0.000147512
UniRef90_A6KYH0	0	0.00023275	2.29302e-05	2.09184e-05
UniRef90_A0A175AB67	0	0	0.000141685	0.000134829
UniRef90_A0A1C3Q5X6	0	0	9.76022e-05	0.000178729
UniRef90_A0A372KXH2	0	0	9.59938e-05	0.000180326
UniRef90_A0A378FZG8	0.000170154	0.000104812	3.15174e-07	1.03572e-06
UniRef90_A0A2A2SWS9	0	0	0.000115933	0.000160167
UniRef90_A0A173SD94	0.000260236	0	9.85056e-06	5.80052e-06
UniRef90_A0A0E2SQ66	0	0	0.000169811	0.000105908
UniRef90_A0A2S0VH99	0	0	0.00010603	0.000169503
UniRef90_E5V0K3	0	0	0.000163331	0.000112138
UniRef90_A0A173R0H7	0	0.000253498	1.17279e-05	9.74106e-06
UniRef90_A0A078RYI5	0	0	0.000157105	0.00011774
UniRef90_A5Z511	0.000174632	0	9.9561e-05	0
UniRef90_A0A3E2TVW3	0	0.000274034	0	0
UniRef90_A0A396ENA5	0.000236909	0	2.13608e-05	1.53397e-05
UniRef90_A8S470	0	0	0.000130218	0.000143324
UniRef90_A5ZI73	0	0.000269516	3.37624e-06	0
UniRef90_B5CLP7	0	0.000256816	1.60286e-05	0
UniRef90_A0A1Y4PGQ9	0.000272712	0	0	0
UniRef90_A0A016CMK3	0	0	0.000118508	0.000154079
UniRef90_A0A368MJG3	0	0	2.84704e-05	0.000243929
UniRef90_UPI000C7CE463	0	0	0.000109008	0.000163057
UniRef90_R5RUF9	0	0	0.000136378	0.000135527
UniRef90_A0A0E1CS11	0	0	9.80026e-05	0.000173797
UniRef90_R7KG75	0.0002212	0	2.60852e-05	2.44304e-05
UniRef90_J2X955	0	0	0.000100659	0.000170789
UniRef90_A8SVC3	0.000150851	0	7.15533e-05	4.85662e-05
UniRef90_A0A380YRL0	0.000246794	0	1.1738e-05	1.2422e-05
UniRef90_A0A396FP46	0.00026042	0	6.87106e-06	3.65934e-06
UniRef90_D1JR34	0	0	0.000165742	0.00010514
UniRef90_Q64RJ9	0	0	0.000160146	0.000110491
UniRef90_A0A015YXG8	0	0	0.000130608	0.000139443
UniRef90_UPI0007D0C000	0	0	7.98392e-05	0.000190097
UniRef90_K1U933	0	0.000269516	3.50046e-07	0
UniRef90_D3AK44	0	0	0.000156055	0.000113741
UniRef90_A0A085PBC4	0	0	9.11586e-05	0.00017853
UniRef90_K1SJ72	0	0.000269516	0	0
UniRef90_W1EH84	0	0	0.000125366	0.000144094
UniRef90_A6BI92	0	0	0.000128117	0.000141308
UniRef90_A0A0E1CFK0	0	0	0.00015557	0.000113784
UniRef90_A0A367SPJ4	0	0	9.72648e-05	0.000171942
UniRef90_C0FSN2	0	0	0.000145277	0.000123671
UniRef90_A0A174CLL2	0	0.00023358	2.14522e-05	1.34413e-05
UniRef90_A0A1D3KV17	0	0	8.81122e-05	0.000180192
UniRef90_A0A396EGX2	0	0	0.000176701	9.14788e-05
UniRef90_UPI0009431A77	0	0.000268044	1.16682e-07	0
UniRef90_A0A396EGE8	0	0	0.000147233	0.000120857
UniRef90_A0A0B2IKY1	0	0	9.63701e-05	0.000171631
UniRef90_A0A078RE62	0.000245778	0	1.08608e-05	1.12798e-05
UniRef90_J2LWU7	0	0	0.000112855	0.000154953
UniRef90_A0A3A1MQ94	0	0	8.27684e-05	0.000184965
UniRef90_C7H713	0.000264072	0	2.4799e-06	7.50042e-07
UniRef90_A0A078RA19	0	0	0.000128938	0.000137647
UniRef90_J2X9X3	0	0	9.28204e-05	0.000173723
UniRef90_A0A174F3T9	0.000262812	0	2.14768e-06	1.47252e-06
UniRef90_A0A2A2SMK7	0	0	0.000109816	0.000156114
UniRef90_A0A1Q6H4Z1	0.00026544	0	0	4.44124e-07
UniRef90_C4Z8W9	0	0.00025548	5.92872e-06	4.27962e-06
UniRef90_F8ARM5	0.00026544	0	1.42352e-07	8.0607e-08
UniRef90_A4E983	0	0.00026161	1.87904e-06	2.14684e-06
UniRef90_C0B7X0	0	0	0.000156607	0.000108953
UniRef90_C7H317	0	0.00022868	1.88799e-05	1.76463e-05
UniRef90_A0A076ISQ4	0	0.000235262	1.45382e-05	1.52922e-05
UniRef90_A0A378EB54	0	0.000256816	2.66248e-06	5.08544e-06
UniRef90_K1S9X9	0	0.000264432	0	0
UniRef90_A0A1D3KP62	0	0	9.27924e-05	0.000171166
UniRef90_D1K9F1	0	0	0.000173169	9.01692e-05
UniRef90_A8SC40	0	0	0.000117062	0.000146232
UniRef90_A0A2A5MH20	0	0	9.26836e-05	0.000169793
UniRef90_A0A174SIJ8	0.000260236	0	1.46274e-06	7.60926e-07
UniRef90_A0A181VMH8	0	0	8.61276e-05	0.000176311
UniRef90_W1I845	0.0002524	0	9.79794e-06	0
UniRef90_H3K8R0	0.00022649	0	2.08342e-05	1.48668e-05
UniRef90_R5RHH3	0	0.000219472	2.3684e-05	1.88124e-05
UniRef90_C8T5L4	0	0	0.000130913	0.00013102
UniRef90_UPI000E4CFF93	0.00024278	0	1.9127e-05	0
UniRef90_UPI000E4ECAF6	0	0.000261628	0	0
UniRef90_C4NV10	0	0	9.26045e-05	0.000168845
UniRef90_A0A0B7G6R4	0	0	8.73052e-05	0.000173934
UniRef90_R6R110	0	0.000242232	9.15186e-06	9.8503e-06
UniRef90_A0A1D3KH48	0	0	9.30542e-05	0.00016809
UniRef90_Q64NS0	0	0	0.000145082	0.000116062
UniRef90_A0A377XDM0	0	0	9.04982e-05	0.000170143
UniRef90_UPI0005587413	0.000258546	0	1.81528e-06	0
UniRef90_R7JKE5	0.000260236	0	0	0
UniRef90_A0A378NUN8	0	0	0.000150883	0.000109346
UniRef90_R5W4D0	0	0.000221954	2.01452e-05	1.81273e-05
UniRef90_A0A173TPA9	0	0.000245874	9.32718e-06	4.97242e-06
UniRef90_A0A378BSC4	0	0.000256816	1.33825e-06	1.95687e-06
UniRef90_A8CY68	0	0	8.86752e-05	0.000171383
UniRef90_A0A1D3KG64	0	0	7.48152e-05	0.000185023
UniRef90_A0A377Z9X6	0	0	8.80464e-05	0.000171743
UniRef90_UPI000939285F	0	0.000256816	2.7712e-06	0
UniRef90_V0AXQ8	0	0	9.6324e-05	0.000163218
UniRef90_A0A2Z6EPC5	0	0	0.000102146	0.000157109
UniRef90_A0A173QTH5	0.0002528	0	3.7954e-06	2.50938e-06
UniRef90_A0A2T1LFS9	0	0	8.50852e-05	0.000173907
UniRef90_A0A1C3PNC1	0	0	7.5721e-05	0.000182845
UniRef90_A5KRG8	0	0.000203536	3.33768e-05	2.1537e-05
UniRef90_J2DM01	0	0	8.04386e-05	0.000177988
UniRef90_A0A078RCR8	0	0	0.000122804	0.000135581
UniRef90_A0A1L5CIB7	0	0	8.10591e-05	0.000177015
UniRef90_A0A377WEU1	0	0.000234698	7.11758e-06	1.61298e-05
UniRef90_A0A017NBT1	0	0	0.000164028	9.3764e-05
UniRef90_A0A175D165	0	0	8.5411e-05	0.000172179
UniRef90_A6L607	0	0.000218982	1.89712e-05	1.96214e-05
UniRef90_A0A2R4AHQ5	0	0	8.57396e-05	0.000171661
UniRef90_J2DFW5	0	0.000255812	2.88888e-07	1.09851e-06
UniRef90_UPI000943E158	0.000256878	0	2.68598e-07	0
UniRef90_R6TNE7	0	0.000246098	6.73596e-06	4.30822e-06
UniRef90_A0A0T5XMC0	0	0	8.87454e-05	0.000167534
UniRef90_C7H7R1	0	0	0.000133455	0.000122648
UniRef90_F7KMV0	0	0	0.00011195	0.00014415
UniRef90_A6TF51	0	0	8.90992e-05	0.0001667
UniRef90_A0A2A7BHA1	0.00024885	0	6.79642e-06	0
UniRef90_U2KF82	0	0	0.000238491	1.71093e-05
UniRef90_R7NBA8	0	0.000238696	9.83984e-06	6.98887e-06
UniRef90_E4W3C2	0	0	0.00014333	0.000112034
UniRef90_UPI0006DD1B35	0.000253606	0	1.64177e-06	0
UniRef90_A0A0E2SRW3	0	0	0.000139154	0.000115691
UniRef90_C5EVP1	0	0.000249628	2.50478e-06	2.49312e-06
UniRef90_F7LJX2	0	0	0.000143268	0.000111279
UniRef90_B0MW91	0	0.000242232	8.80056e-06	3.11624e-06
UniRef90_B7C9C8	0	0	0.000165902	8.81666e-05
UniRef90_A0A3E4JFU5	0	0	0.000130085	0.000123782
UniRef90_A5KQR1	0	0	0.000163083	9.0777e-05
UniRef90_A0A1D3KFY9	0	0	7.60076e-05	0.000177676
UniRef90_K1REW5	0.000253606	0	0	0
UniRef90_U2KCM5	0	0	0.000148722	0.000104773
UniRef90_A0A0E1C8G3	0	0	9.34184e-05	0.000160019
UniRef90_A0A395YRQ5	0.000232502	0	1.17319e-05	9.03e-06
UniRef90_A7AL34	0	0	0.000106764	0.000146281
UniRef90_A0A173XYL4	0.000210666	0	2.58292e-05	1.64675e-05
UniRef90_A0A377SLU2	0	0.000252846	3.5524e-08	0
UniRef90_E4M9S8	0.000245778	0	7.04652e-06	0
UniRef90_R6T9V3	0.000243077	0	6.06324e-06	3.48722e-06
UniRef90_W1EJ13	0	0	0.000109153	0.000143212
UniRef90_A0A378A268	0	0.000250266	8.71542e-07	1.06214e-06
UniRef90_A0A378EBX1	0	0	7.08966e-05	0.000181077
UniRef90_K5ZCD7	0	0	6.71408e-05	0.000184493
UniRef90_W1GWJ1	0	0	9.06222e-05	0.000160809
UniRef90_G4Q5F6	0	0	0.000156333	9.48606e-05
UniRef90_A0A016BL47	0	0	0.000125629	0.000125511
UniRef90_A0A377UL77	0	0.00024526	1.82235e-06	4.00752e-06
UniRef90_C7H7U7	0	0	0.000108516	0.000142398
UniRef90_A0A0T5IU32	0	0	7.98524e-05	0.000170973
UniRef90_C9KYK8	0	0	0.000135356	0.000115452
UniRef90_A0A3E5I7I8	0	0	0.000144012	0.000106786
UniRef90_A0A333G406	0	0.000247738	1.29411e-06	1.75015e-06
UniRef90_A0A0J5APA9	0	0	0.000101609	0.000148883
UniRef90_C7H4J9	0	0	0.000137032	0.000113141
UniRef90_A0A150Y647	0	0	0.00014287	0.00010721
UniRef90_A0A1C3PXM4	0	0	8.40472e-05	0.000165921
UniRef90_A0A174KGT4	0.000245778	0	2.63178e-06	1.48751e-06
UniRef90_A0A1D3U514	0	0	7.81705e-05	0.000171545
UniRef90_R6HU26	0	0.000231378	1.83003e-05	0
UniRef90_A0A396BJ38	0	0.000249642	0	0
UniRef90_A0A378AP44	0	0.000212346	1.18111e-05	2.54328e-05
UniRef90_A0A370YRN0	0	0	8.3476e-05	0.000166023
UniRef90_J2E2K7	0	0	0.000105145	0.000144331
UniRef90_B0MYP5	0	0	0.000170822	7.86494e-05
UniRef90_A0A374NVH9	0.000245778	0	1.37532e-06	2.22506e-06
UniRef90_I9SGF5	0	0.000248994	0	0
UniRef90_B5XXT4	0	0	8.06506e-05	0.000168313
UniRef90_D1JMZ9	0	0	0.000134333	0.000114384
UniRef90_A0A1L5CIC8	0	0	8.12446e-05	0.000167371
UniRef90_J7TI65	0.000238778	0	5.22492e-06	4.24864e-06
UniRef90_UPI000E5D0D1F	0	0.00024805	0	0
UniRef90_A0A396GCE4	0	0	0.000148137	9.99044e-05
UniRef90_A0A377TSY4	0	0.000247738	0	1.43876e-07
UniRef90_A0A1S8YFE0	0	0	7.79118e-05	0.000169968
UniRef90_A5KL47	0	0	0.000141382	0.000106459
UniRef90_B0N057	0	0	0.000164372	8.34058e-05
UniRef90_W1HHC3	0	0.000247738	0	0
UniRef90_J9GZS3	0	0.000247738	0	0
UniRef90_A0A377ZUR5	0	0.000246842	2.14062e-07	6.34052e-07
UniRef90_A0A0H3FKV4	0	0	8.76316e-05	0.000159676
UniRef90_A0A3A9J336	0.000247304	0	0	0
UniRef90_R6KY68	0	0.000246492	4.26132e-07	0
UniRef90_A0A0E1C7B0	0	0	8.26516e-05	0.000164223
UniRef90_K1UG83	0	0.000244648	1.94716e-06	0
UniRef90_A0A099PLZ3	0	0	8.94359e-05	0.000157124
UniRef90_C0CKM7	0.000211788	0	2.16454e-05	1.27409e-05
UniRef90_A0A1D3KH30	0	0	7.8597e-05	0.000167472
UniRef90_A0A0P0M583	0.000232842	0	6.26524e-06	6.69942e-06
UniRef90_D1JWU1	0	0	0.000139869	0.000105935
UniRef90_R6H414	0.000245778	0	0	0
UniRef90_UPI00020C9592	0.000245778	0	0	0
UniRef90_A0A173XV70	0	0.000212288	1.67381e-05	1.65757e-05
UniRef90_A0A2X3D9S5	0	0.00024404	6.28022e-07	9.08804e-07
UniRef90_A0A3E5I2E8	0	0	0.000189402	5.60854e-05
UniRef90_R5VB64	0.00024131	0	4.0009e-06	0
UniRef90_A8SEZ3	0.000239136	0	3.52712e-06	2.5708e-06
UniRef90_A0A2A5MDZ1	0	0	9.24228e-05	0.000152649
UniRef90_UPI0009006EBB	0	0	9.36704e-05	0.000151268
UniRef90_UPI000587DE5E	0	0.00024404	8.53048e-07	0
UniRef90_A0A1C3Q0F9	0	0	8.98966e-05	0.000154883
UniRef90_Q5LHS7	0.000207376	0	2.142e-05	1.59577e-05
UniRef90_C4ZFA8	0	0	0.000149469	9.52842e-05
UniRef90_UPI000E5C7295	0.000239856	0	4.49418e-06	0
UniRef90_D4JXS5	0	0.000236966	5.13764e-06	1.96428e-06
UniRef90_W9B482	0	0	8.66148e-05	0.000157138
UniRef90_B5XYX1	0	0	9.58612e-05	0.000147818
UniRef90_A0A142EBY6	0	0	8.2118e-05	0.000161224
UniRef90_K1UTV8	0	0.000241636	1.60517e-06	0
UniRef90_A0A396EDT6	0	0	0.000133306	0.000109874
UniRef90_D6JDQ2	0	0	8.27873e-05	0.000160216
UniRef90_R6RUE4	0	0.000242532	2.7935e-07	1.82029e-07
UniRef90_A0A290GH22	0	0	7.47346e-05	0.000168224
UniRef90_A0A378F2E6	0	0	7.47346e-05	0.0001682
UniRef90_A0A2R4PE57	0	0	8.47096e-05	0.00015811
UniRef90_K1SIC6	0.00024278	0	0	0
UniRef90_A0A139LAX9	0.00024278	0	0	0
UniRef90_A8RCH8	0	0	0.000146473	9.62908e-05
UniRef90_A0A0C7KG19	0	0	8.90236e-05	0.00015373
UniRef90_D4JA99	0	0	0.000145905	9.67894e-05
UniRef90_A0A174U6A5	0	0	0.000128861	0.000113742
UniRef90_A0A1M2TF14	0	0	7.38389e-05	0.000168597
UniRef90_A0A069SFN5	0	0	0.00014097	0.00010146
UniRef90_J2DKY0	0	0	7.6127e-05	0.000166184
UniRef90_UPI000A214E41	0	0	8.2637e-05	0.000159583
UniRef90_A0A1S9BQ52	0	0	8.2222e-05	0.000159922
UniRef90_E5XIN5	0.000209558	0	2.02832e-05	1.18181e-05
UniRef90_A0A377BDP0	0	0	9.24308e-05	0.000149185
UniRef90_D4IPW8	0	0	0.000145402	9.57302e-05
UniRef90_A0A015TZV8	0	0	0.000172032	6.90856e-05
UniRef90_A0A373IE87	0.000232842	0	7.58156e-06	0
UniRef90_A0A1D3KH14	0	0	9.04645e-05	0.000149566
UniRef90_A0A1D3KP20	0	0	8.69981e-05	0.000152962
UniRef90_A0A264C4Y8	0	0	9.74182e-05	0.00014241
UniRef90_A0A1D3KNA7	0	0	8.38534e-05	0.00015591
UniRef90_A0A2K9JGM9	0	0	0.000146406	9.29615e-05
UniRef90_K1FZF3	0	0	0.000142953	9.62132e-05
UniRef90_A0A377XDU7	0	0	7.6524e-05	0.000162173
UniRef90_A0A2X1QHB2	0	0.000230832	2.46758e-06	5.37864e-06
UniRef90_UPI000C7CF9DC	0	0	8.72301e-05	0.000151441
UniRef90_A0A173XHM1	0	0	0.000141817	9.68528e-05
UniRef90_A0A1V2T3P4	0	0	8.35556e-05	0.000155006
UniRef90_K1T5X1	0.00023842	0	0	0
UniRef90_R6I2L4	0	0.000234698	3.5598e-06	0
UniRef90_D1K6B7	0	0	0.000128678	0.000108942
UniRef90_A0A1D3KBY4	0	0	8.05095e-05	0.000157081
UniRef90_A0A0E1CHF8	0	0	7.5921e-05	0.000161638
UniRef90_UPI000E208803	0	0.000228148	9.33772e-06	0
UniRef90_B0MU53	0.000219372	0	1.40127e-05	4.06716e-06
UniRef90_A0A174ZZL4	0	0	0.000151793	8.55544e-05
UniRef90_W1HUV0	0	0	8.62901e-05	0.000150845
UniRef90_E5XKH1	0	0	0.000148957	8.80928e-05
UniRef90_A0A0B7G2X5	0	0	7.23154e-05	0.000164729
UniRef90_C9KSF0	0.000209008	0	1.2788e-05	1.51364e-05
UniRef90_A0A016HVM3	0.000212352	0	1.43331e-05	1.01589e-05
UniRef90_A0A3A5R754	0	0	0.000133807	0.000102935
UniRef90_A6KXI7	0.000230208	0	3.37426e-06	3.13413e-06
UniRef90_A0A1C3Q9W1	0	0	7.64953e-05	0.000160095
UniRef90_C4ZE25	0	0	0.000170996	6.5273e-05
UniRef90_H3K4M3	0	0.000219472	9.849e-06	6.68997e-06
UniRef90_A5KJF8	0	0	0.00014647	8.95276e-05
UniRef90_A0A174BL32	0.000210666	0	1.36626e-05	1.16246e-05
UniRef90_A0A315ZXH6	0	0	0.000130797	0.000105088
UniRef90_A0A1C3Q1B6	0	0	7.73956e-05	0.00015809
UniRef90_A0A1L5URX7	0	0	7.35358e-05	0.000161945
UniRef90_A0A1V2T477	0	0	7.49946e-05	0.00016042
UniRef90_A0A139K4Y9	0	0	0.000118399	0.000116969
UniRef90_A0A2X3EMD8	0	0.00023029	1.8513e-06	2.97448e-06
UniRef90_UPI000D0AFEF4	0	0	8.04808e-05	0.000154544
UniRef90_A0A1D3U079	0	0	8.35065e-05	0.000151274
UniRef90_W1GCM8	0	0	7.54078e-05	0.000159049
UniRef90_D4IIR7	0.0002212	0	6.51136e-06	6.40898e-06
UniRef90_A0A377BZU5	0	0	8.35756e-05	0.000150454
UniRef90_A0A1C3Q9U6	0	0	7.71116e-05	0.0001569
UniRef90_A0A139SYZ4	0.000192348	0	2.36166e-05	1.78439e-05
UniRef90_A0A017PEE5	0.00018693	0	2.77442e-05	1.91164e-05
UniRef90_P18782	0	0	8.40832e-05	0.000149692
UniRef90_J2DIZ0	0	0	7.78922e-05	0.000155832
UniRef90_E2ZJP9	0	0	0.000145199	8.85222e-05
UniRef90_E2ZJS2	0	0	0.00010609	0.00012733
UniRef90_A0A1S8YDJ1	0	0	5.21466e-05	0.000181222
UniRef90_P07658	0	0	7.67054e-05	0.000156625
UniRef90_J2X1X7	0	0	8.10552e-05	0.000152023
UniRef90_B2RH62	0	0	0.000132968	0.000100077
UniRef90_C8SXQ2	0	0	7.93434e-05	0.000153604
UniRef90_K6BT97	0	0	0.000149905	8.29804e-05
UniRef90_B0P5G9	0	0	0.000140818	9.1948e-05
UniRef90_A0A377UUA2	0	0.00022762	1.71752e-06	3.37332e-06
UniRef90_A0A0M6WCX0	0.000223058	0	5.37764e-06	4.20992e-06
UniRef90_R5KJM2	0.00010423	0.000128408	0	0
UniRef90_A5KJG7	0	0	0.000158881	7.36998e-05
UniRef90_R5Q552	0	0.00022762	4.84458e-06	0
UniRef90_A0A015X993	0	0	0.000146673	8.57266e-05
UniRef90_J5GJA7	0.000230818	0	7.969e-07	7.82216e-07
UniRef90_W1HSQ9	0	0	8.35494e-05	0.000148802
UniRef90_A0A174C6L4	0	0	0.00015825	7.39326e-05
UniRef90_A0A1V2T3G6	0	0	7.49215e-05	0.00015722
UniRef90_U2RP10	0	0	0.000136721	9.53446e-05
UniRef90_R7B708	0.000231488	0	4.96216e-07	0
UniRef90_D4K413	0.000205768	0	1.31955e-05	1.29603e-05
UniRef90_D1K2N0	0	0	0.000131551	0.000100315
UniRef90_A0A015TGA7	0	0	0.000127724	0.000104016
UniRef90_A0A174Z6E0	0.000212352	0	1.16053e-05	7.6027e-06
UniRef90_A0A377WCW7	0	0	8.07278e-05	0.0001508
UniRef90_UPI0007A5C1B8	0	0.000231378	0	0
UniRef90_A0A1D3KHA7	0	0	7.3462e-05	0.000157729
UniRef90_A0A2U8T203	0	0	7.43938e-05	0.000156614
UniRef90_R6IJ48	0.000223058	0	4.51604e-06	3.39384e-06
UniRef90_A0A1I2BR40	0	0	0.000160146	7.07422e-05
UniRef90_A0A174C8B9	0.000197109	0	2.16334e-05	1.18772e-05
UniRef90_UPI000D3B9D45	0	0	6.7434e-05	0.000163184
UniRef90_A0A336J0H4	0	0.00023029	2.01442e-07	0
UniRef90_A0A0M6WJP3	0.00021292	0	1.25532e-05	4.9083e-06
UniRef90_A0A016BSL5	0	0	0.000130318	9.99914e-05
UniRef90_A0A1D3KE74	0	0	8.02679e-05	0.000149935
UniRef90_A0A367TMC1	0	0	8.18894e-05	0.000147997
UniRef90_A0A1D3KUY5	0	0	7.6174e-05	0.000153436
UniRef90_A0A2A7BC93	0.000202626	0	1.05019e-05	1.63492e-05
UniRef90_A0A378AYH6	0	0.000228148	3.65004e-07	7.62906e-07
UniRef90_A0A2A5MJ99	0	0	7.8527e-05	0.000150712
UniRef90_A0A391P1A2	0.000229158	0	0	0
UniRef90_A0A333FSW2	0.00022655	0	9.24696e-07	1.59436e-06
UniRef90_E6ST13	0	0	0.000137836	9.11905e-05
UniRef90_A0A1C6HMD4	0.000228828	0	0	0
UniRef90_D1JR64	0	0	0.00013476	9.4047e-05
UniRef90_A0A139T742	0	0	0.00015526	7.34416e-05
UniRef90_V0AX81	0	0	7.41186e-05	0.000154545
UniRef90_A0A2A5PLV5	0	0	9.37914e-05	0.00013484
UniRef90_A0A2X1QFC5	0.000226514	0	6.47054e-07	1.41264e-06
UniRef90_V0B1I5	0	0	6.47946e-05	0.000163735
UniRef90_A5ZSY0	0.000192348	0	2.22984e-05	1.36335e-05
UniRef90_W1E966	0	0	8.56052e-05	0.000142613
UniRef90_A0A1H7S873	0	0.000228148	0	0
UniRef90_A0A1V2T385	0	0	8.2863e-05	0.000145251
UniRef90_A0A1C3Q6J1	0	0	8.25677e-05	0.000145471
UniRef90_A6TGA0	0	0	7.83624e-05	0.000149467
UniRef90_B0MVW9	0	0	0.000190784	3.69828e-05
UniRef90_A0A174LVW0	0	0	0.000127308	0.000100423
UniRef90_H3K9P9	0	0	0.000133337	9.43485e-05
UniRef90_A0A1V2T396	0	0	7.62524e-05	0.000151304
UniRef90_A0A377TUI2	0	0.000220954	2.03888e-06	4.55676e-06
UniRef90_A0A1V2T3C0	0	0	7.62508e-05	0.0001511
UniRef90_A0A174HYA9	0	0	0.000145728	8.16022e-05
UniRef90_A0A2A5MHJ9	0	0	7.25092e-05	0.000154598
UniRef90_D1JYA0	0.000193752	0	1.62002e-05	1.7147e-05
UniRef90_S3YEK0	0	0.000225526	1.42382e-07	1.43035e-06
UniRef90_UPI000E4F5FAE	0	0.000227092	0	0
UniRef90_A0A0E2RHA5	0	0	0.000130028	9.70198e-05
UniRef90_A0A2T1LG57	0	0	7.75994e-05	0.000149437
UniRef90_A0A2N4W4N6	0	0	8.65444e-05	0.000140267
UniRef90_A0A3E2UB56	0	0	0.000107483	0.000118835
UniRef90_A0A1C1T3C6	0	0	7.22843e-05	0.000154011
UniRef90_UPI000812D5D9	0	0	7.92578e-05	0.000147026
UniRef90_K1SAL4	0.000226228	0	0	0
UniRef90_A0A2X3EEB9	0.000222436	0	1.42352e-06	2.19044e-06
UniRef90_A0A2T1LJG3	0	0	7.9228e-05	0.000146818
UniRef90_A0A291TCA5	0.000205768	0	1.1246e-05	9.02932e-06
UniRef90_A0A377TQ98	0.00022495	0	2.84704e-07	7.25284e-07
UniRef90_K6AU60	0	0	0.000180504	4.529e-05
UniRef90_A0A3E2V7V1	0.000204184	0	9.7366e-06	1.17511e-05
UniRef90_B7AVC5	9.66408e-05	0.000119058	6.33108e-06	3.46446e-06
UniRef90_A0A1S8YEU6	0	0	6.8678e-05	0.000156761
UniRef90_C4ZFQ1	0	0	9.99698e-05	0.000125458
UniRef90_A0A1S8YC45	0	0	8.32167e-05	0.000142169
UniRef90_A0A316RET4	0	0.000223476	1.85276e-06	0
UniRef90_H3KA98	0.00019638	0	1.71146e-05	1.16948e-05
UniRef90_A0A173WH30	0	0	0.000137472	8.75966e-05
UniRef90_A0A2X2X3V4	0	0.00022501	0	0
UniRef90_A0A076IPX4	0	0.000222458	1.59447e-06	8.44192e-07
UniRef90_A0A1S8Y5A2	0	0	7.81454e-05	0.000146717
UniRef90_A6KYN6	0	0	0.000104411	0.000120313
UniRef90_A0A2T1LJG6	0	0	7.24437e-05	0.000152175
UniRef90_A0A1C3PXH3	0	0	6.35672e-05	0.000161051
UniRef90_A0A176UBZ7	0	0	0.000150095	7.45102e-05
UniRef90_A0A1D3KI74	0	0	8.06534e-05	0.000143862
UniRef90_Q4KRH3	0	0	0.000138951	8.50212e-05
UniRef90_A0A1V2T2J2	0	0	7.48172e-05	0.000148546
UniRef90_A0A377TJ06	0.00021877	0	1.77964e-06	2.46232e-06
UniRef90_D4IKT9	0	0	0.000112102	0.000110866
UniRef90_A5ZT92	0	0	0.000123129	9.97998e-05
UniRef90_B7ASI3	0.000222712	0	0	0
UniRef90_R6Y547	0.000212352	0	5.83828e-06	4.48334e-06
UniRef90_L1LRI7	0.000222436	0	0	0
UniRef90_A0A0M6WP02	0.000212352	0	6.17716e-06	3.62846e-06
UniRef90_C6JBP8	0	0	0.000149469	7.25993e-05
UniRef90_I8WMN2	0.000210666	0	4.46304e-06	6.77078e-06
UniRef90_Q650P2	0	0	0.000134745	8.69376e-05
UniRef90_R6FC09	0.000219372	0	9.9967e-07	1.26311e-06
UniRef90_E5XDD9	0	0	0.000159502	6.21154e-05
UniRef90_A5KP23	0	0	0.000133094	8.84456e-05
UniRef90_Q8A480	0	0	0.00012333	9.81311e-05
UniRef90_UPI000E55D135	0	0.000221454	0	0
UniRef90_A0A3E5GAA7	0	0	0.000129731	9.1645e-05
UniRef90_R5CY39	0.000219372	0	8.19154e-07	1.15082e-06
UniRef90_C0F0D4	0	0	0.00013347	8.76818e-05
UniRef90_A0A1D3KNC8	0	0	8.04062e-05	0.000140502
UniRef90_A0A174TBX6	0	0	0.000116714	0.000104158
UniRef90_A0A078QMV3	0	0	8.5411e-05	0.00013538
UniRef90_A0A370YTU8	0	0.000220686	0	0
UniRef90_D1JPL6	0	0	0.000128417	9.22176e-05
UniRef90_A0A1S9BQJ1	0	0	6.90782e-05	0.000151427
UniRef90_K1G2T6	0	0	0.000144982	7.55186e-05
UniRef90_S2YLD4	0	0	0.000144874	7.53804e-05
UniRef90_A0A157UY61	0	0	7.49156e-05	0.000145332
UniRef90_C4ZFB0	0	0	0.000139067	8.11444e-05
UniRef90_K5ZVM1	0.000214346	0	2.43424e-06	3.42716e-06
UniRef90_A5KLF3	0	0	0.000135506	8.45172e-05
UniRef90_D4LV81	0	0	0.000166771	5.31572e-05
UniRef90_B0MXE8	0	0	0.00017121	4.85754e-05
UniRef90_G9YZZ5	0	0	7.48809e-05	0.000144826
UniRef90_A0A2H9BFM7	0	0	8.44317e-05	0.000135181
UniRef90_A0A1D3KPX1	0	0	7.3589e-05	0.000145935
UniRef90_A0A174VEK4	0	0	0.000119765	9.97312e-05
UniRef90_R6I4K8	0.000215952	0	3.32438e-06	0
UniRef90_A0A1D3U572	0	0	6.5575e-05	0.00015355
UniRef90_A0A2X4Y6E9	0	0.000218982	0	0
UniRef90_P0A9Y1	0	0	9.01598e-05	0.000128802
UniRef90_A0A0D0ZIG5	0.00020008	0	1.87609e-05	0
UniRef90_A0A174M509	0.000190964	0	1.82945e-05	9.50494e-06
UniRef90_A0A0E2THW2	0	0	0.000133897	8.46734e-05
UniRef90_UPI000D74C6B4	0	0	8.3605e-05	0.000134658
UniRef90_A0A1V2T3V2	0	0	7.55636e-05	0.000142645
UniRef90_K1G3I9	0	0	0.000135774	8.23668e-05
UniRef90_A0A396FKR2	0.000207376	0	6.36468e-06	4.26976e-06
UniRef90_A0A1C6I5G1	0	0.000218008	0	0
UniRef90_A0A1D3KP18	0	0	7.45496e-05	0.000143343
UniRef90_A0A2K9H4N4	0.000217872	0	0	0
UniRef90_A0A174VVR7	0.000207376	0	7.09708e-06	3.32144e-06
[truncated: 3,001 more rows]

## Sheet: Longitudinal_Genera
taxonomy	CT12_AC_1	CT12_AC_2	CT12_AC_3	CT12_DC_1	CT12_DC_2	CT12_DC_3	CT12_R_1	CT12_R_2	CT12_R_3	CT12_TI_1	CT12_TI_2	CT12_TI_3	CT13_AC_1	CT13_AC_2	CT13_AC_3	CT13_DC_1	CT13_DC_2	CT13_DC_3	CT13_R_1	CT13_R_2	CT13_R_3	CT13_TI_1	CT13_TI_2	CT13_TI_3	CT14_AC_1	CT14_AC_2	CT14_AC_3	CT14_DC_1	CT14_DC_2	CT14_DC_3	CT14_R_1	CT14_TI_1	CT14_TI_2	CT14_TI_3	CT7_AC_1	CT7_AC_2	CT7_AC_3	CT7_DC_1	CT7_DC_2	CT7_DC_3	CT7_R_1	CT7_R_2	CT7_R_3	CT7_TI_1	CT7_TI_2	CT7_TI_3	CT8_AC_1	CT8_AC_2	CT8_AC_3
D_0__Bacteria;D_1__Bacteroidetes;D_2__Bacteroidia;D_3__Bacteroidales;D_4__Bacteroidaceae;D_5__Bacteroides	24.7421	31.4684	27.7105	42.8842	44.1895	48.1105	36.1579	41.4368	39.2947	41.4947	44.8789	42.1895	37.4	44.7053	32.8211	35.1474	13.9632	26.1842	7.90526	10.4211	2.26316	44.7474	48.4526	45.2842	26.4895	40.3579	38.5842	44.8053	40.3368	38.5	39.9368	29.9158	9.49474	35.7789	38.3	39.1579	40.1947	41.7158	31.9737	36.9526	13.5947	6.62105	9.55263	38.9211	36.4421	36.1368	10.1579	23.2579	21.4684
D_0__Bacteria;D_1__Verrucomicrobia;D_2__Verrucomicrobiae;D_3__Verrucomicrobiales;D_4__Akkermansiaceae;D_5__Akkermansia	16.6947	19.8895	21.4053	15.3895	15.9316	11.2789	17.0684	13.2368	15.7105	10.3632	3.78947	10.5632	0	0	0	0	0	0	0	0	0	0	0	0	0	0	0	0.105263	0	0	0.0473684	0.0684211	0	0	0	0	0.0421053	0	0.263158	0	0	0	0	0	0.147368	0	0	0	0
D_0__Bacteria;D_1__Bacteroidetes;D_2__Bacteroidia;D_3__Bacteroidales;D_4__Rikenellaceae;D_5__Alistipes	1.94211	2.97895	2.32632	5.74737	5.92632	6.37368	5.37895	5.20526	6.15263	3.66316	9.93684	3.54737	0.4	0.2	0.110526	0.184211	0	0	0	0	0	0.221053	0.163158	0.142105	1.59474	0.510526	0	0.421053	0.563158	0.484211	0.405263	1.1	2.57368	1.38421	4.92632	5.97368	8.26316	3.9	2.94737	4.35263	2.31053	0.0947368	0.605263	3.36842	5.53158	3.02632	1.29474	2.50526	2.48947
D_0__Bacteria;D_1__Firmicutes;D_2__Clostridia;D_3__Clostridiales;D_4__Lachnospiraceae;D_5__[Ruminococcus] torques group	14.6421	14.5316	13.2895	2.79474	2.94737	2.86316	3.72105	3.68947	3.18421	8.93158	1.96842	9.88947	2.68947	5.61053	5.76316	5.07895	5.81053	4.88421	2.19474	1.95263	0	7.11053	6.36316	4.83684	1.04737	2.72105	3.09474	3.23684	2.36316	2.07368	3.98421	2.5	2.44737	1.42632	2.34211	1.65789	0.857895	1.42632	1.31579	2.66316	0.7	0.594737	0.926316	1.76316	2.06316	0.563158	0.747368	3.23158	3.77368
D_0__Bacteria;D_1__Firmicutes;D_2__Clostridia;D_3__Clostridiales;D_4__Ruminococcaceae;D_5__Faecalibacterium	3.1	1.93684	2.79474	3.84737	3.8	3.36316	2.72105	3.23158	3.14211	3.24211	3.05263	3.77895	1.95263	1.18421	1.55789	1.81579	1.00526	1.51579	0	0	0.421053	3.17895	2.89474	2.32632	4.28947	6.33158	6.99474	7.17368	6.41579	3.84737	5.8	10.2263	10.3632	9.75789	1.73684	5.18947	1.92105	4.14211	8.21579	3.77895	3.91579	1.58421	1.33684	8.47368	6.78947	7.12105	2.55263	5.96842	6.49474
D_0__Bacteria;D_1__Firmicutes;D_2__Clostridia;D_3__Clostridiales;D_4__Lachnospiraceae;D_5__Blautia	4.15789	3.69474	5.17895	2.45263	2.25789	2.89474	3.34211	3.12632	2.63158	4.97368	2.81053	4.56842	3.44737	3.31053	5.53684	4.58947	6.19474	3.53684	0	1.66316	2.88421	3.33684	1.82105	3.07895	3.52105	3.41579	3.72632	5.21053	4.06316	3.48947	3.91579	5.7	4.78421	2.48421	4.52632	3.95789	3.87368	3.11053	4.87895	2.67368	1.30526	0.742105	2.12632	4.76316	3.17368	2.13684	1.41579	3.74737	2.87368
D_0__Bacteria;D_1__Firmicutes;D_2__Clostridia;D_3__Clostridiales;D_4__Ruminococcaceae;D_5__Ruminococcus 2	2.76842	2.84211	3.04211	4.96316	5.07368	4.82105	7.94737	6.71579	8.61053	2.61053	1.78421	2.36316	2.01053	0.542105	2.02632	0.152632	0.268421	0.473684	0	0	0	2.03684	0.857895	1.16842	1.04737	1.56842	0.752632	0.757895	1.31579	0.642105	1.32105	3.28421	2.5	2.67368	0	0	0	0	0	0	0	0	0	0	0	0	0	0.442105	0.236842
D_0__Bacteria;D_1__Firmicutes;D_2__Negativicutes;D_3__Selenomonadales;D_4__Veillonellaceae;D_5__Megasphaera	3.81053	2.50526	2.61579	2.36316	2.17895	2.89474	4.10526	3.94737	2.84737	4.51053	4.48947	2.56316	0.205263	0	0.194737	0	0	0	0	0	0	0.0684211	0.215789	0	0	0	0	0	0	0	1.01053	0	0	0	0	0	0	0	0	0	0	0	0	0	0	0	0.826316	1.94211	2.17368
D_0__Bacteria;D_1__Proteobacteria;D_2__Gammaproteobacteria;D_3__Enterobacteriales;D_4__Enterobacteriaceae;D_5__Escherichia-Shigella	0.294737	0.184211	0.0421053	0.0947368	0.105263	0.0578947	0.0631579	0.121053	0.0473684	0.0578947	0	0.0631579	0	0	0	0	0	0	0	0	0	0	0	0	1.21053	0.178947	0.294737	0.0894737	0.226316	0.336842	0.263158	0.205263	0	0.263158	0.378947	0.452632	0.331579	12.4842	10.9579	16.9895	64.4526	64.9842	64.5789	0.242105	0.442105	0.7	0	0	0
D_0__Bacteria;D_1__Firmicutes;D_2__Negativicutes;D_3__Selenomonadales;D_4__Veillonellaceae;D_5__Dialister	2.1	1.77895	1.43684	0.652632	0.531579	0.710526	0.710526	0.578947	0.563158	2.82105	5.76842	1.53158	0.236842	0	0.121053	0	0	0	0	0	0	0.226316	0.210526	0.363158	0.857895	0.410526	0	0.484211	0.1	0.331579	0.473684	0.521053	1.51579	0.694737	1.24737	1.43158	1.52105	0.747368	1.63158	0.663158	0.5	0	0.415789	1.14211	1.17895	0.815789	1.30526	3.08421	3.96842
D_0__Bacteria;D_1__Proteobacteria;D_2__Gammaproteobacteria;D_3__Betaproteobacteriales;D_4__Burkholderiaceae;D_5__Sutterella	0.852632	0.942105	1.04737	1.70526	1.21579	1.24737	1.45789	1.24211	1.7	2.16316	2.33158	2.36842	0	0.484211	0	0	0	0	0	0	0	0	0	0	5.84737	7.05789	8.63158	5.69474	4.57368	6.22105	3.38421	4.31579	6.2	7.34737	0	0	0	0	0	0	0	0	0	0	0.0947368	0	1.33684	3.88947	5.21579
D_0__Bacteria;D_1__Firmicutes;D_2__Clostridia;D_3__Clostridiales;D_4__Ruminococcaceae;D_5__Subdoligranulum	3.23684	3.66842	4.28947	2.2	1.65789	1.48947	2.11579	2.01579	1.77368	2.51053	1.08421	3.03684	0	0	0.431579	0.142105	0.294737	0	0	0	0	0.157895	0.263158	0.210526	3.52105	4.72105	3.25263	3.21053	3.54737	3.37895	2.47895	6.26316	4.13158	5.31053	1.7	1.46842	1.27368	0.289474	1.08947	2.10526	0.752632	0.421053	0	2.38421	1.66842	2.07895	0.657895	1.82105	0.978947
D_0__Bacteria;D_1__Bacteroidetes;D_2__Bacteroidia;D_3__Bacteroidales;D_4__Tannerellaceae;D_5__Parabacteroides	0.805263	0.947368	0.473684	0.931579	0.815789	1.06842	0.926316	0.778947	1.15263	0.805263	1.17895	1.00526	0.757895	0	0	0.436842	0.126316	0	0	1.42105	0	0.468421	0.384211	0.189474	1.04211	1.53158	0.763158	2.81053	1.47895	1.17368	1.64737	1.52632	2.35789	1.70526	5.75789	7.01579	6.7	7.14737	4.76842	8.89474	1.41053	0.831579	1	5.55263	5.50526	4.64737	1.32105	2.27895	3.17895
D_0__Bacteria;D_1__Firmicutes;D_2__Clostridia;D_3__Clostridiales;D_4__Ruminococcaceae;D_5__Ruminococcaceae UCG-002	1.32632	0.836842	1.04211	1.46316	1.57895	1.04211	0.894737	0.8	1.06842	1.02105	2.36842	1.47895	0	0	0	0	0	0	0	0	0	0.0473684	0	0	0	0	0	0.163158	0	0	0.0421053	0.189474	0	0	0.3	0.384211	0.547368	0.126316	0	0.252632	0.0684211	0	0	0.484211	0.373684	0.673684	0.410526	0.631579	0.194737
D_0__Bacteria;D_1__Firmicutes;D_2__Clostridia;D_3__Clostridiales;D_4__Lachnospiraceae;D_5__Dorea	1.74737	1.23684	1.50526	0.905263	0.868421	0.889474	0.878947	1.08947	0.868421	1.34211	2.03684	1.48421	5.39474	5.63684	4.02105	3.6	5.04211	4.88947	0	0	2.04211	3.88421	3.27368	2.8	0	0.121053	0	1.84211	1.39474	2.73684	1.87368	0.0842105	1.16842	0	1.95263	1.93158	1.75263	2.12632	1.87895	1.61579	0.715789	0.352632	0.342105	1.56316	0.421053	0.178947	0	0.773684	0.536842
D_0__Bacteria;D_1__Bacteroidetes;D_2__Bacteroidia;D_3__Bacteroidales;D_4__Muribaculaceae;D_5__metagenome	0	0.3	0.663158	1.43684	1.16842	1.2	0.742105	1.59474	0.952632	1.14737	1.68421	1.14211	0	0	0	0	0	0	0	0	0	0	0	0	0	0	0	0	0	0	0	0	0	0	0	0	0	0	0	0	0	0	0	0	0	0	0	0	0
D_0__Bacteria;D_1__Firmicutes;D_2__Clostridia;D_3__Clostridiales;D_4__Lachnospiraceae;__	1.72105	0.842105	1.24737	1.58421	1.42105	1.42632	1.7	1.34737	1.42632	0.621053	0.636842	0.942105	0	0	0	0	0	0	0	0	0	0	0.131579	0	0	0.294737	0.447368	0.394737	0.478947	0.415789	0.563158	0.636842	0.410526	0.4	0.526316	0.252632	0.221053	0	0	0.205263	0.1	0	0	0.378947	0.184211	0	0	0.5	0.410526
D_0__Bacteria;D_1__Proteobacteria;D_2__Deltaproteobacteria;D_3__Desulfovibrionales;D_4__Desulfovibrionaceae;D_5__Bilophila	0	0.552632	0.478947	0.542105	0.294737	0.615789	0.436842	0.568421	0.536842	0.894737	1.60526	0.726316	0	0	0	0	0	0	0	0	0	0	0	0	0	0	0	0	0	0.268421	0.163158	0.278947	0	0	1.34737	1.72105	1.43158	0.552632	1.86316	0	0.689474	0.573684	0	1.52632	1.28947	0.778947	0	0.836842	0.5
D_0__Bacteria;D_1__Bacteroidetes;D_2__Bacteroidia;D_3__Bacteroidales;D_4__Marinifilaceae;D_5__Odoribacter	0	0.436842	0.247368	0.826316	0.884211	1.18947	0.610526	1.00526	0.647368	0.794737	0.984211	0.773684	0	0	0	0	0	0	0	0	0	0	0	0	0	0	0	0	0	0	0.0421053	0.0315789	0	0	0	0	0	0	0	0	0	0	0	0	0	0	0	0.484211	0.768421
D_0__Bacteria;D_1__Firmicutes;D_2__Erysipelotrichia;D_3__Erysipelotrichales;D_4__Erysipelotrichaceae;D_5__Erysipelotrichaceae UCG-003	0.410526	0.463158	0.484211	0.247368	0.121053	0.168421	0.284211	0.121053	0.205263	0.178947	0.147368	0.268421	16.7632	15.3579	18.6684	21.2842	28.5632	20.5947	10.0158	2.55263	3.54737	13.3368	13.7105	18.1	0	1.42632	0.884211	1.13684	0.305263	0.5	0.642105	1.55789	3.03684	1.16842	0.805263	0.836842	0.415789	0	0.331579	0.473684	0.378947	0.205263	0.384211	0.242105	1.32632	0.663158	0.878947	2.41053	1.57368
D_0__Bacteria;D_1__Firmicutes;D_2__Clostridia;D_3__Clostridiales;D_4__Lachnospiraceae;D_5__Coprococcus 3	0.8	0.710526	1.02632	0.436842	0.584211	0.373684	0.631579	0.478947	0.621053	0.673684	0.473684	0.721053	2.8	1.66316	1.77895	4	1.13684	2.24737	0	0	0.678947	2.63684	2.05789	1.93158	0	0.8	1.42105	0.542105	0.415789	0.431579	0.436842	0.994737	0.773684	0.736842	2.37895	1.29474	0.994737	1.20526	1.01053	0.684211	0.631579	0.394737	0.547368	1.16842	1.31053	1.11053	0.642105	1.04211	1.04211
D_0__Bacteria;D_1__Firmicutes;D_2__Clostridia;D_3__Clostridiales;D_4__Lachnospiraceae;D_5__[Eubacterium] hallii group	0.321053	1.03158	1	0.494737	0.536842	0.405263	0.484211	0.489474	0.678947	0.642105	0.663158	0.642105	0	0.557895	0.431579	0	0	0	0	0	0	0.0631579	0	0	0	0.110526	1.08421	0.342105	0.784211	0.789474	0.752632	0.536842	0.989474	0	1.37368	0.963158	1.40526	0.957895	3.02632	0.247368	0.257895	0.194737	0.131579	0.973684	0.352632	0	0	0.4	0.436842
D_0__Bacteria;D_1__Firmicutes;D_2__Clostridia;D_3__Clostridiales;D_4__Ruminococcaceae;D_5__Negativibacillus	1.01579	0.563158	0.752632	0.631579	0.631579	0.463158	0.352632	0.336842	0.410526	0.610526	0.636842	0.605263	0	0	0	0	0	0	0	0	0	0	0	0	0	0	0	0	0	0	0	0	0	0	0	0	0	0	0	0	0	0	0	0	0	0	0	0.363158	0
D_0__Bacteria;D_1__Firmicutes;D_2__Clostridia;D_3__Clostridiales;D_4__Lachnospiraceae;D_5__Roseburia	0.3	0.215789	0.510526	0.9	0.621053	0.778947	0.536842	0.5	0.889474	0.0842105	0.352632	0.0631579	0	0.310526	0	0	0	0	0	0	0	0	0	0.0789474	0	0	0	0.0368421	0	0	0	0.0315789	0	0.352632	0	0.310526	0.605263	0.115789	0.8	0	0.0526316	0	0	0	0	0	0	0.2	0
D_0__Bacteria;D_1__Firmicutes;D_2__Clostridia;D_3__Clostridiales;D_4__Ruminococcaceae;D_5__Ruminiclostridium 5	0.405263	0.426316	0.147368	0.273684	0.231579	0.236842	0.321053	0.315789	0.247368	0.3	0.315789	0.284211	0.221053	0	0	0	0	0	0	0	0	0	0	0	0	0	0	0	0	0	0.0684211	0	0	0	3.15789	2.96842	2.33158	1.38421	4.15789	0.989474	0.736842	1.14737	0.173684	2.41053	4.63158	2.64737	0	0	0
D_0__Bacteria;D_1__Firmicutes;D_2__Clostridia;D_3__Clostridiales;D_4__Ruminococcaceae;D_5__[Eubacterium] coprostanoligenes group	0	0.247368	0.163158	0.326316	0.284211	0.252632	0.126316	0.421053	0.389474	0.189474	0.747368	0.0736842	0	0	0	0	0	0	0	0	0	0	0	0	0	0	0	0	0	0	0.0421053	0.336842	0	0	0	0.0947368	0.136842	0	0	0	0	0	0	0	0.131579	0	0	0.410526	0.252632
D_0__Bacteria;D_1__Firmicutes;D_2__Clostridia;D_3__Clostridiales;D_4__Ruminococcaceae;D_5__Butyricicoccus	0.384211	0.352632	0.463158	0.257895	0.257895	0.221053	0.363158	0.157895	0.210526	0.284211	0.442105	0.384211	0.221053	0	0.105263	0	0	0	0	0	0.963158	0	0	0	1.25263	0.931579	1.81579	1.39474	0.757895	1.45789	1.79474	1.35263	0.510526	1.05263	0.110526	0.305263	0.121053	0.484211	0.252632	0.184211	0	0	0	0	0	0.178947	0	0.442105	0.636842
D_0__Bacteria;D_1__Firmicutes;D_2__Clostridia;D_3__Clostridiales;D_4__Ruminococcaceae;D_5__Ruminococcaceae UCG-004	0.147368	0	0.0684211	0.263158	0.163158	0.231579	0.168421	0.273684	0.152632	0.163158	0.668421	0.115789	0	0	0	0	0	0	0	0	0	0	0	0	0	0	0	0	0	0	0	0.0526316	0	0	0.552632	0.521053	0.326316	0.568421	0.226316	0.268421	0.221053	0	0.221053	0.321053	0.257895	0.436842	0	0	0
D_0__Bacteria;D_1__Firmicutes;D_2__Clostridia;D_3__Clostridiales;D_4__Lachnospiraceae;D_5__Lachnoclostridium	0.568421	0.510526	0.468421	0.3	0.3	0.331579	0.394737	0.326316	0.157895	0.257895	0.289474	0.289474	0	0	0.452632	0.0631579	0	0	0	0	0	0.1	0.0789474	0.210526	0.794737	1.27368	0.657895	1.32105	1.10526	1.25263	0.842105	0.963158	0	1.16842	0.378947	0.852632	0.457895	0.157895	0.631579	0.242105	0.189474	0.131579	0.126316	0.321053	0.510526	0	0	0	0
[truncated: 273 more rows]
[truncated: 9 more columns]

## Sheet: Longitudinal_Species
clade_name	CT7_TI_1	CT7_TI_2	CT7_TI_3	CT7_AC_1	CT7_AC_2	CT7_AC_3	CT7_DC_1	CT7_DC_2	CT7_DC_3	CT7_R_1	CT7_R_2	CT7_R_3	CT8_TI_1	CT8_TI_2	CT8_TI_3	CT8_AC_1	CT8_AC_2	CT8_AC_3	CT8_DC_1	CT8_DC_2	CT8_DC_3	CT8_R_1	CT8_R_2	CT8_R_3	CT12_TI_1	CT12_TI_2	CT12_TI_3	CT12_AC_1	CT12_AC_2	CT12_AC_3	CT12_DC_1	CT12_DC_2	CT12_DC_3	CT12_R_1	CT12_R_2	CT12_R_3	CT13_TI_1	CT13_TI_2	CT13_TI_3	CT13_AC_1	CT13_AC_2	CT13_AC_3	CT13_DC_1	CT13_DC_2	CT13_DC_3	CT13_R_1	CT13_R_2	CT13_R_3	CT14_TI_1
[truncated: 190 more rows]
[truncated: 9 more columns]

[truncated: 2 more sheets: Longitudinal_Pathways, Longitudinal_Genes]
