# Supplementary material for: Microbial-enrichment method enables high-throughput metagenomic characterization from host-rich samples
Source: Springer Nature journal article supplement (doi:10.1038/s41592-023-02025-4), 2023-10-12
Supplement: MOESM10 [file 41592_2023_2025_MOESM10_ESM.xlsx]

## Sheet: Fig6B_SNPs_Rbromii
	sample_id	unique_pos_identifier	variable	value	total_reads	relative_abundance	reference	ref_match
5	CT12_TI3_2	0	C	7	114	6.14035	A	FALSE
16	CT12_TI3_2	1	A	3	109	2.75229	G	FALSE
17	CT12_TI3_2	1	C	1	109	0.917431	G	FALSE
19	CT12_TI3_2	1	T	2	109	1.83486	G	FALSE
24	CT12_TI3_1	5	A	6	210	2.85714	C	FALSE
27	CT12_TI3_1	5	T	8	210	3.80952	C	FALSE
28	CT12_TI3_2	5	A	1	178	0.561798	C	FALSE
31	CT12_TI3_2	5	T	8	178	4.49438	C	FALSE
36	CT12_TI3_1	6	A	5	207	2.41546	G	FALSE
37	CT12_TI3_1	6	C	2	207	0.966184	G	FALSE
39	CT12_TI3_1	6	T	5	207	2.41546	G	FALSE
43	CT12_TI3_2	6	T	9	170	5.29412	G	FALSE
45	CT12_TI3_3	6	C	1	232	0.431034	G	FALSE
47	CT12_TI3_3	6	T	19	232	8.18966	G	FALSE
48	CT12_TI3_1	7	A	13	214	6.07477	G	FALSE
49	CT12_TI3_1	7	C	2	214	0.934579	G	FALSE
52	CT12_TI3_2	7	A	13	196	6.63265	G	FALSE
53	CT12_TI3_2	7	C	1	196	0.510204	G	FALSE
55	CT12_TI3_2	7	T	6	196	3.06122	G	FALSE
56	CT12_TI3_3	7	A	21	249	8.43373	G	FALSE
57	CT12_TI3_3	7	C	3	249	1.20482	G	FALSE
59	CT12_TI3_3	7	T	4	249	1.60643	G	FALSE
61	CT12_TI3_1	8	C	2	247	0.809717	T	FALSE
62	CT12_TI3_1	8	G	24	247	9.7166	T	FALSE
66	CT12_TI3_2	8	G	18	197	9.13706	T	FALSE
68	CT12_TI3_3	8	A	1	269	0.371747	T	FALSE
70	CT12_TI3_3	8	G	43	269	15.9851	T	FALSE
72	CT12_TI3_1	9	A	27	241	11.2033	G	FALSE
73	CT12_TI3_1	9	C	3	241	1.24481	G	FALSE
75	CT12_TI3_1	9	T	6	241	2.48963	G	FALSE
76	CT12_TI3_2	9	A	13	179	7.26257	G	FALSE
77	CT12_TI3_2	9	C	6	179	3.35196	G	FALSE
79	CT12_TI3_2	9	T	6	179	3.35196	G	FALSE
80	CT12_TI3_3	9	A	55	281	19.573	G	FALSE
81	CT12_TI3_3	9	C	3	281	1.06762	G	FALSE
83	CT12_TI3_3	9	T	9	281	3.20285	G	FALSE
84	CT12_TI3_1	10	A	5	260	1.92308	C	FALSE
86	CT12_TI3_1	10	G	1	260	0.384615	C	FALSE
87	CT12_TI3_1	10	T	39	260	15	C	FALSE
88	CT12_TI3_2	10	A	6	191	3.14136	C	FALSE
90	CT12_TI3_2	10	G	1	191	0.52356	C	FALSE
91	CT12_TI3_2	10	T	25	191	13.089	C	FALSE
92	CT12_TI3_3	10	A	9	312	2.88462	C	FALSE
94	CT12_TI3_3	10	G	1	312	0.320513	C	FALSE
95	CT12_TI3_3	10	T	68	312	21.7949	C	FALSE
100	CT12_TI3_2	11	A	10	237	4.21941	C	FALSE
102	CT12_TI3_2	11	G	5	237	2.1097	C	FALSE
112	CT12_TI3_2	12	A	3	247	1.21457	G	FALSE
113	CT12_TI3_2	12	C	1	247	0.404858	G	FALSE
115	CT12_TI3_2	12	T	9	247	3.64372	G	FALSE
116	CT12_TI3_3	12	A	2	368	0.543478	G	FALSE
117	CT12_TI3_3	12	C	2	368	0.543478	G	FALSE
119	CT12_TI3_3	12	T	15	368	4.07609	G	FALSE
120	CT12_TI3_1	13	A	60	252	23.8095	G	FALSE
121	CT12_TI3_1	13	C	5	252	1.98413	G	FALSE
123	CT12_TI3_1	13	T	5	252	1.98413	G	FALSE
124	CT12_TI3_2	13	A	93	217	42.8571	G	FALSE
125	CT12_TI3_2	13	C	8	217	3.68664	G	FALSE
127	CT12_TI3_2	13	T	5	217	2.30415	G	FALSE
128	CT12_TI3_3	13	A	123	349	35.2436	G	FALSE
129	CT12_TI3_3	13	C	10	349	2.86533	G	FALSE
131	CT12_TI3_3	13	T	14	349	4.01146	G	FALSE
132	CT12_TI3_1	14	A	8	245	3.26531	T	FALSE
133	CT12_TI3_1	14	C	61	245	24.898	T	FALSE
134	CT12_TI3_1	14	G	4	245	1.63265	T	FALSE
136	CT12_TI3_2	14	A	2	213	0.938967	T	FALSE
137	CT12_TI3_2	14	C	97	213	45.5399	T	FALSE
138	CT12_TI3_2	14	G	11	213	5.16432	T	FALSE
140	CT12_TI3_3	14	A	19	337	5.63798	T	FALSE
141	CT12_TI3_3	14	C	120	337	35.6083	T	FALSE
142	CT12_TI3_3	14	G	9	337	2.67062	T	FALSE
144	CT12_TI3_1	15	A	4	235	1.70213	T	FALSE
145	CT12_TI3_1	15	C	7	235	2.97872	T	FALSE
146	CT12_TI3_1	15	G	3	235	1.2766	T	FALSE
148	CT12_TI3_2	15	A	6	212	2.83019	T	FALSE
149	CT12_TI3_2	15	C	6	212	2.83019	T	FALSE
150	CT12_TI3_2	15	G	2	212	0.943396	T	FALSE
152	CT12_TI3_3	15	A	6	313	1.91693	T	FALSE
153	CT12_TI3_3	15	C	8	313	2.55591	T	FALSE
154	CT12_TI3_3	15	G	2	313	0.638978	T	FALSE
158	CT12_TI3_1	16	G	33	226	14.6018	A	FALSE
159	CT12_TI3_1	16	T	3	226	1.32743	A	FALSE
161	CT12_TI3_2	16	C	2	199	1.00503	A	FALSE
162	CT12_TI3_2	16	G	58	199	29.1457	A	FALSE
163	CT12_TI3_2	16	T	5	199	2.51256	A	FALSE
165	CT12_TI3_3	16	C	2	264	0.757576	A	FALSE
166	CT12_TI3_3	16	G	51	264	19.3182	A	FALSE
167	CT12_TI3_3	16	T	9	264	3.40909	A	FALSE
168	CT12_TI3_1	17	A	1	205	0.487805	T	FALSE
169	CT12_TI3_1	17	C	24	205	11.7073	T	FALSE
172	CT12_TI3_2	17	A	5	186	2.68817	T	FALSE
173	CT12_TI3_2	17	C	35	186	18.8172	T	FALSE
174	CT12_TI3_2	17	G	7	186	3.76344	T	FALSE
176	CT12_TI3_3	17	A	2	265	0.754717	T	FALSE
177	CT12_TI3_3	17	C	37	265	13.9623	T	FALSE
178	CT12_TI3_3	17	G	3	265	1.13208	T	FALSE
180	CT12_TI3_1	18	A	2	204	0.980392	C	FALSE
182	CT12_TI3_1	18	G	2	204	0.980392	C	FALSE
183	CT12_TI3_1	18	T	18	204	8.82353	C	FALSE
184	CT12_TI3_2	18	A	5	199	2.51256	C	FALSE
186	CT12_TI3_2	18	G	4	199	2.01005	C	FALSE
187	CT12_TI3_2	18	T	28	199	14.0704	C	FALSE
188	CT12_TI3_3	18	A	1	262	0.381679	C	FALSE
190	CT12_TI3_3	18	G	3	262	1.14504	C	FALSE
191	CT12_TI3_3	18	T	22	262	8.39695	C	FALSE
196	CT12_TI3_2	19	A	8	190	4.21053	T	FALSE
197	CT12_TI3_2	19	C	1	190	0.526316	T	FALSE
198	CT12_TI3_2	19	G	3	190	1.57895	T	FALSE
211	CT12_TI3_2	30	T	12	185	6.48649	C	FALSE
221	CT12_TI3_2	31	C	1	152	0.657895	A	FALSE
222	CT12_TI3_2	31	G	7	152	4.60526	A	FALSE
232	CT12_TI3_2	32	A	1	150	0.666667	C	FALSE
235	CT12_TI3_2	32	T	7	150	4.66667	C	FALSE
241	CT12_TI3_1	62	C	7	100	7	G	FALSE
243	CT12_TI3_1	62	T	25	100	25	G	FALSE
245	CT12_TI3_2	62	C	1	56	1.78571	G	FALSE
247	CT12_TI3_2	62	T	14	56	25	G	FALSE
249	CT12_TI3_3	62	C	4	147	2.72109	G	FALSE
251	CT12_TI3_3	62	T	44	147	29.932	G	FALSE
257	CT12_TI3_2	63	C	5	67	7.46269	A	FALSE
259	CT12_TI3_2	63	T	2	67	2.98507	A	FALSE
261	CT12_TI3_3	63	C	9	157	5.73248	A	FALSE
263	CT12_TI3_3	63	T	10	157	6.36943	A	FALSE
264	CT12_TI3_1	64	A	24	111	21.6216	G	FALSE
265	CT12_TI3_1	64	C	1	111	0.900901	G	FALSE
268	CT12_TI3_2	64	A	5	67	7.46269	G	FALSE
269	CT12_TI3_2	64	C	9	67	13.4328	G	FALSE
272	CT12_TI3_3	64	A	34	160	21.25	G	FALSE
273	CT12_TI3_3	64	C	11	160	6.875	G	FALSE
277	CT12_TI3_1	65	C	23	111	20.7207	A	FALSE
281	CT12_TI3_2	65	C	8	67	11.9403	A	FALSE
285	CT12_TI3_3	65	C	29	159	18.239	A	FALSE
291	CT12_TI3_1	66	T	23	111	20.7207	A	FALSE
295	CT12_TI3_2	66	T	4	66	6.06061	A	FALSE
299	CT12_TI3_3	66	T	26	144	18.0556	A	FALSE
305	CT12_TI3_2	67	C	6	63	9.52381	G	FALSE
309	CT12_TI3_3	67	C	11	144	7.63889	G	FALSE
312	CT12_TI3_1	68	A	23	92	25	T	FALSE
316	CT12_TI3_2	68	A	4	56	7.14286	T	FALSE
317	CT12_TI3_2	68	C	1	56	1.78571	T	FALSE
320	CT12_TI3_3	68	A	30	130	23.0769	T	FALSE
321	CT12_TI3_3	68	C	2	130	1.53846	T	FALSE
325	CT12_TI3_1	69	C	24	93	25.8065	G	FALSE
328	CT12_TI3_2	69	A	1	55	1.81818	G	FALSE
329	CT12_TI3_2	69	C	4	55	7.27273	G	FALSE
332	CT12_TI3_3	69	A	3	128	2.34375	G	FALSE
333	CT12_TI3_3	69	C	31	128	24.2188	G	FALSE
335	CT12_TI3_3	69	T	1	128	0.78125	G	FALSE
336	CT12_TI3_1	70	A	24	91	26.3736	T	FALSE
340	CT12_TI3_2	70	A	4	52	7.69231	T	FALSE
344	CT12_TI3_3	70	A	30	123	24.3902	T	FALSE
345	CT12_TI3_3	70	C	1	123	0.813008	T	FALSE
349	CT12_TI3_1	71	C	24	92	26.087	A	FALSE
353	CT12_TI3_2	71	C	5	54	9.25926	A	FALSE
357	CT12_TI3_3	71	C	32	128	25	A	FALSE
364	CT12_TI3_2	73	A	2	114	1.75439	C	FALSE
366	CT12_TI3_2	73	G	4	114	3.50877	C	FALSE
377	CT12_TI3_2	74	C	1	90	1.11111	A	FALSE
379	CT12_TI3_2	74	T	4	90	4.44444	A	FALSE
389	CT12_TI3_2	75	C	6	98	6.12245	A	FALSE
400	CT12_TI3_2	128	A	2	144	1.38889	T	FALSE
401	CT12_TI3_2	128	C	5	144	3.47222	T	FALSE
402	CT12_TI3_2	128	G	1	144	0.694444	T	FALSE
413	CT12_TI3_2	182	C	1	59	1.69492	A	FALSE
414	CT12_TI3_2	182	G	3	59	5.08475	A	FALSE
418	CT12_TI3_3	182	G	4	126	3.1746	A	FALSE
419	CT12_TI3_3	182	T	6	126	4.7619	A	FALSE
425	CT12_TI3_2	183	C	1	59	1.69492	A	FALSE
426	CT12_TI3_2	183	G	3	59	5.08475	A	FALSE
430	CT12_TI3_3	183	G	3	120	2.5	A	FALSE
431	CT12_TI3_3	183	T	8	120	6.66667	A	FALSE
433	CT12_TI3_1	187	C	2	58	3.44828	G	FALSE
435	CT12_TI3_1	187	T	2	58	3.44828	G	FALSE
437	CT12_TI3_2	187	C	1	71	1.40845	G	FALSE
439	CT12_TI3_2	187	T	4	71	5.6338	G	FALSE
448	CT12_TI3_2	188	A	1	80	1.25	G	FALSE
451	CT12_TI3_2	188	T	7	80	8.75	G	FALSE
461	CT12_TI3_2	189	C	8	83	9.63855	T	FALSE
462	CT12_TI3_2	189	G	1	83	1.20482	T	FALSE
473	CT12_TI3_2	190	C	1	83	1.20482	A	FALSE
474	CT12_TI3_2	190	G	8	83	9.63855	A	FALSE
475	CT12_TI3_2	190	T	2	83	2.40964	A	FALSE
485	CT12_TI3_2	191	C	1	84	1.19048	A	FALSE
486	CT12_TI3_2	191	G	9	84	10.7143	A	FALSE
487	CT12_TI3_2	191	T	1	84	1.19048	A	FALSE
498	CT12_TI3_2	192	G	2	85	2.35294	A	FALSE
499	CT12_TI3_2	192	T	3	85	3.52941	A	FALSE
509	CT12_TI3_2	193	C	8	76	10.5263	A	FALSE
511	CT12_TI3_2	193	T	2	76	2.63158	A	FALSE
517	CT12_TI3_1	194	C	1	104	0.961538	A	FALSE
519	CT12_TI3_1	194	T	5	104	4.80769	A	FALSE
521	CT12_TI3_2	194	C	1	78	1.28205	A	FALSE
523	CT12_TI3_2	194	T	15	78	19.2308	A	FALSE
535	CT12_TI3_2	195	T	13	78	16.6667	A	FALSE
541	CT12_TI3_1	196	C	7	94	7.44681	A	FALSE
545	CT12_TI3_2	196	C	14	88	15.9091	A	FALSE
554	CT12_TI3_1	197	G	6	94	6.38298	A	FALSE
558	CT12_TI3_2	197	G	14	88	15.9091	A	FALSE
566	CT12_TI3_1	202	G	2	176	1.13636	A	FALSE
567	CT12_TI3_1	202	T	24	176	13.6364	A	FALSE
571	CT12_TI3_2	202	T	28	144	19.4444	A	FALSE
575	CT12_TI3_3	202	T	38	218	17.4312	A	FALSE
579	CT12_TI3_1	203	T	23	176	13.0682	A	FALSE
583	CT12_TI3_2	203	T	19	144	13.1944	A	FALSE
586	CT12_TI3_3	203	G	1	218	0.458716	A	FALSE
587	CT12_TI3_3	203	T	29	218	13.3028	A	FALSE
589	CT12_TI3_1	204	C	1	176	0.568182	G	FALSE
591	CT12_TI3_1	204	T	23	176	13.0682	G	FALSE
593	CT12_TI3_2	204	C	2	146	1.36986	G	FALSE
595	CT12_TI3_2	204	T	19	146	13.0137	G	FALSE
599	CT12_TI3_3	204	T	29	222	13.0631	G	FALSE
603	CT12_TI3_1	205	T	26	176	14.7727	G	FALSE
604	CT12_TI3_2	205	A	2	145	1.37931	G	FALSE
607	CT12_TI3_2	205	T	28	145	19.3103	G	FALSE
611	CT12_TI3_3	205	T	41	222	18.4685	G	FALSE
612	CT12_TI3_1	206	A	3	169	1.77515	C	FALSE
615	CT12_TI3_1	206	T	16	169	9.46746	C	FALSE
619	CT12_TI3_2	206	T	16	132	12.1212	C	FALSE
620	CT12_TI3_3	206	A	3	198	1.51515	C	FALSE
623	CT12_TI3_3	206	T	22	198	11.1111	C	FALSE
627	CT12_TI3_1	207	T	13	164	7.92683	G	FALSE
628	CT12_TI3_2	207	A	2	132	1.51515	G	FALSE
631	CT12_TI3_2	207	T	14	132	10.6061	G	FALSE
635	CT12_TI3_3	207	T	23	198	11.6162	G	FALSE
641	CT12_TI3_2	208	C	3	125	2.4	G	FALSE
643	CT12_TI3_2	208	T	10	125	8	G	FALSE
655	CT12_TI3_2	209	T	9	129	6.97674	A	FALSE
665	CT12_TI3_2	210	C	1	124	0.806452	A	FALSE
667	CT12_TI3_2	210	T	9	124	7.25806	A	FALSE
677	CT12_TI3_2	211	C	1	123	0.813008	A	FALSE
679	CT12_TI3_2	211	T	9	123	7.31707	A	FALSE
688	CT12_TI3_2	212	A	6	90	6.66667	T	FALSE
692	CT12_TI3_3	212	A	7	130	5.38462	T	FALSE
693	CT12_TI3_3	212	C	1	130	0.769231	T	FALSE
696	CT12_TI3_1	213	A	10	142	7.04225	C	FALSE
698	CT12_TI3_1	213	G	1	142	0.704225	C	FALSE
700	CT12_TI3_2	213	A	4	89	4.49438	C	FALSE
702	CT12_TI3_2	213	G	1	89	1.1236	C	FALSE
704	CT12_TI3_3	213	A	8	133	6.01504	C	FALSE
706	CT12_TI3_3	213	G	1	133	0.75188	C	FALSE
708	CT12_TI3_1	214	A	6	136	4.41176	C	FALSE
710	CT12_TI3_1	214	G	3	136	2.20588	C	FALSE
712	CT12_TI3_2	214	A	5	83	6.0241	C	FALSE
716	CT12_TI3_3	214	A	6	130	4.61538	C	FALSE
718	CT12_TI3_3	214	G	3	130	2.30769	C	FALSE
719	CT12_TI3_3	214	T	1	130	0.769231	C	FALSE
724	CT12_TI3_2	215	A	4	88	4.54545	T	FALSE
726	CT12_TI3_2	215	G	1	88	1.13636	T	FALSE
737	CT12_TI3_2	216	C	2	93	2.15054	G	FALSE
739	CT12_TI3_2	216	T	3	93	3.22581	G	FALSE
748	CT12_TI3_2	217	A	5	93	5.37634	T	FALSE
760	CT12_TI3_2	218	A	4	93	4.30108	T	FALSE
762	CT12_TI3_2	218	G	2	93	2.15054	T	FALSE
768	CT12_TI3_1	219	A	8	155	5.16129	T	FALSE
769	CT12_TI3_1	219	C	5	155	3.22581	T	FALSE
772	CT12_TI3_2	219	A	4	92	4.34783	T	FALSE
773	CT12_TI3_2	219	C	2	92	2.17391	T	FALSE
774	CT12_TI3_2	219	G	2	92	2.17391	T	FALSE
785	CT12_TI3_2	220	C	3	92	3.26087	A	FALSE
786	CT12_TI3_2	220	G	1	92	1.08696	A	FALSE
787	CT12_TI3_2	220	T	1	92	1.08696	A	FALSE
797	CT12_TI3_2	221	C	2	98	2.04082	A	FALSE
799	CT12_TI3_2	221	T	4	98	4.08163	A	FALSE
809	CT12_TI3_2	222	C	6	104	5.76923	A	FALSE
811	CT12_TI3_2	222	T	2	104	1.92308	A	FALSE
813	CT12_TI3_3	222	C	8	137	5.83942	A	FALSE
814	CT12_TI3_3	222	G	1	137	0.729927	A	FALSE
815	CT12_TI3_3	222	T	2	137	1.45985	A	FALSE
817	CT12_TI3_1	223	C	2	172	1.16279	A	FALSE
818	CT12_TI3_1	223	G	2	172	1.16279	A	FALSE
819	CT12_TI3_1	223	T	5	172	2.90698	A	FALSE
821	CT12_TI3_2	223	C	2	108	1.85185	A	FALSE
823	CT12_TI3_2	223	T	5	108	4.62963	A	FALSE
828	CT12_TI3_1	231	A	8	172	4.65116	T	FALSE
829	CT12_TI3_1	231	C	8	172	4.65116	T	FALSE
830	CT12_TI3_1	231	G	2	172	1.16279	T	FALSE
832	CT12_TI3_2	231	A	6	149	4.02685	T	FALSE
833	CT12_TI3_2	231	C	5	149	3.3557	T	FALSE
834	CT12_TI3_2	231	G	2	149	1.34228	T	FALSE
840	CT12_TI3_1	232	A	7	174	4.02299	T	FALSE
841	CT12_TI3_1	232	C	20	174	11.4943	T	FALSE
842	CT12_TI3_1	232	G	10	174	5.74713	T	FALSE
844	CT12_TI3_2	232	A	6	149	4.02685	T	FALSE
845	CT12_TI3_2	232	C	24	149	16.1074	T	FALSE
846	CT12_TI3_2	232	G	10	149	6.71141	T	FALSE
848	CT12_TI3_3	232	A	3	256	1.17188	T	FALSE
849	CT12_TI3_3	232	C	29	256	11.3281	T	FALSE
850	CT12_TI3_3	232	G	18	256	7.03125	T	FALSE
852	CT12_TI3_1	233	A	6	179	3.35196	T	FALSE
853	CT12_TI3_1	233	C	29	179	16.2011	T	FALSE
854	CT12_TI3_1	233	G	10	179	5.58659	T	FALSE
856	CT12_TI3_2	233	A	8	144	5.55556	T	FALSE
857	CT12_TI3_2	233	C	26	144	18.0556	T	FALSE
858	CT12_TI3_2	233	G	4	144	2.77778	T	FALSE
860	CT12_TI3_3	233	A	18	271	6.64207	T	FALSE
861	CT12_TI3_3	233	C	36	271	13.2841	T	FALSE
862	CT12_TI3_3	233	G	7	271	2.58303	T	FALSE
864	CT12_TI3_1	234	A	4	179	2.23464	T	FALSE
865	CT12_TI3_1	234	C	19	179	10.6145	T	FALSE
866	CT12_TI3_1	234	G	11	179	6.14525	T	FALSE
868	CT12_TI3_2	234	A	5	144	3.47222	T	FALSE
869	CT12_TI3_2	234	C	6	144	4.16667	T	FALSE
870	CT12_TI3_2	234	G	14	144	9.72222	T	FALSE
872	CT12_TI3_3	234	A	6	271	2.21402	T	FALSE
873	CT12_TI3_3	234	C	20	271	7.38007	T	FALSE
874	CT12_TI3_3	234	G	15	271	5.53506	T	FALSE
882	CT12_TI3_2	383	G	2	161	1.24224	C	FALSE
883	CT12_TI3_2	383	T	7	161	4.34783	C	FALSE
892	CT12_TI3_2	395	A	1	117	0.854701	C	FALSE
895	CT12_TI3_2	395	T	7	117	5.98291	C	FALSE
906	CT12_TI3_2	396	G	6	128	4.6875	A	FALSE
907	CT12_TI3_2	396	T	1	128	0.78125	A	FALSE
913	CT12_TI3_1	398	C	1	167	0.598802	G	FALSE
915	CT12_TI3_1	398	T	9	167	5.38922	G	FALSE
919	CT12_TI3_2	398	T	9	124	7.25806	G	FALSE
921	CT12_TI3_3	398	C	2	192	1.04167	G	FALSE
923	CT12_TI3_3	398	T	12	192	6.25	G	FALSE
927	CT12_TI3_1	399	T	12	168	7.14286	G	FALSE
931	CT12_TI3_2	399	T	9	126	7.14286	G	FALSE
935	CT12_TI3_3	399	T	12	194	6.18557	G	FALSE
939	CT12_TI3_1	400	T	9	162	5.55556	G	FALSE
943	CT12_TI3_2	400	T	9	123	7.31707	G	FALSE
955	CT12_TI3_2	413	T	6	80	7.5	G	FALSE
964	CT12_TI3_2	592	A	6	131	4.58015	T	FALSE
966	CT12_TI3_2	592	G	2	131	1.52672	T	FALSE
975	CT12_TI3_1	699	T	11	125	8.8	A	FALSE
979	CT12_TI3_2	699	T	20	119	16.8067	A	FALSE
983	CT12_TI3_3	699	T	20	203	9.85222	A	FALSE
988	CT12_TI3_2	700	A	6	99	6.06061	T	FALSE
1003	CT12_TI3_2	701	T	6	99	6.06061	C	FALSE
1012	CT12_TI3_2	702	A	6	100	6	C	FALSE
1024	CT12_TI3_2	703	A	6	100	6	C	FALSE
1027	CT12_TI3_2	703	T	1	100	1	C	FALSE
1032	CT12_TI3_1	704	A	6	117	5.12821	G	FALSE
1033	CT12_TI3_1	704	C	2	117	1.7094	G	FALSE
1035	CT12_TI3_1	704	T	2	117	1.7094	G	FALSE
1036	CT12_TI3_2	704	A	14	115	12.1739	G	FALSE
1037	CT12_TI3_2	704	C	6	115	5.21739	G	FALSE
1040	CT12_TI3_3	704	A	19	213	8.92019	G	FALSE
1043	CT12_TI3_3	704	T	3	213	1.40845	G	FALSE
1047	CT12_TI3_1	705	T	12	124	9.67742	C	FALSE
1051	CT12_TI3_2	705	T	18	112	16.0714	C	FALSE
1052	CT12_TI3_3	705	A	1	215	0.465116	C	FALSE
1055	CT12_TI3_3	705	T	21	215	9.76744	C	FALSE
1057	CT12_TI3_1	706	C	11	108	10.1852	T	FALSE
1058	CT12_TI3_1	706	G	1	108	0.925926	T	FALSE
1061	CT12_TI3_2	706	C	18	107	16.8224	T	FALSE
1062	CT12_TI3_2	706	G	2	107	1.86916	T	FALSE
1065	CT12_TI3_3	706	C	21	207	10.1449	T	FALSE
1071	CT12_TI3_1	707	T	14	107	13.0841	C	FALSE
1075	CT12_TI3_2	707	T	16	105	15.2381	C	FALSE
1078	CT12_TI3_3	707	G	1	210	0.47619	C	FALSE
1079	CT12_TI3_3	707	T	21	210	10	C	FALSE
1083	CT12_TI3_1	708	T	14	106	13.2075	C	FALSE
1084	CT12_TI3_2	708	A	1	103	0.970874	C	FALSE
1087	CT12_TI3_2	708	T	16	103	15.534	C	FALSE
1088	CT12_TI3_3	708	A	1	211	0.473934	C	FALSE
1090	CT12_TI3_3	708	G	1	211	0.473934	C	FALSE
1091	CT12_TI3_3	708	T	23	211	10.9005	C	FALSE
1093	CT12_TI3_1	709	C	12	99	12.1212	T	FALSE
1097	CT12_TI3_2	709	C	9	90	10	T	FALSE
1109	CT12_TI3_2	751	C	6	76	7.89474	T	FALSE
1113	CT12_TI3_3	751	C	14	196	7.14286	T	FALSE
1122	CT12_TI3_2	752	G	6	68	8.82353	A	FALSE
1126	CT12_TI3_3	752	G	19	178	10.6742	A	FALSE
1127	CT12_TI3_3	752	T	1	178	0.561798	A	FALSE
1132	CT12_TI3_2	753	A	1	66	1.51515	T	FALSE
1133	CT12_TI3_2	753	C	6	66	9.09091	T	FALSE
1137	CT12_TI3_3	753	C	14	160	8.75	T	FALSE
1146	CT12_TI3_2	767	G	4	64	6.25	T	FALSE
1152	CT12_TI3_1	768	A	8	92	8.69565	T	FALSE
1154	CT12_TI3_1	768	G	2	92	2.17391	T	FALSE
1156	CT12_TI3_2	768	A	12	79	15.1899	T	FALSE
1157	CT12_TI3_2	768	C	1	79	1.26582	T	FALSE
1160	CT12_TI3_3	768	A	11	90	12.2222	T	FALSE
1164	CT12_TI3_1	769	A	1	93	1.07527	C	FALSE
1166	CT12_TI3_1	769	G	3	93	3.22581	C	FALSE
1167	CT12_TI3_1	769	T	8	93	8.60215	C	FALSE
1170	CT12_TI3_2	769	G	1	79	1.26582	C	FALSE
1171	CT12_TI3_2	769	T	11	79	13.9241	C	FALSE
1172	CT12_TI3_3	769	A	2	91	2.1978	C	FALSE
1174	CT12_TI3_3	769	G	1	91	1.0989	C	FALSE
1175	CT12_TI3_3	769	T	12	91	13.1868	C	FALSE
1177	CT12_TI3_1	770	C	6	101	5.94059	A	FALSE
1178	CT12_TI3_1	770	G	1	101	0.990099	A	FALSE
1181	CT12_TI3_2	770	C	3	84	3.57143	A	FALSE
1182	CT12_TI3_2	770	G	2	84	2.38095	A	FALSE
1183	CT12_TI3_2	770	T	2	84	2.38095	A	FALSE
1185	CT12_TI3_3	770	C	9	100	9	A	FALSE
1187	CT12_TI3_3	770	T	1	100	1	A	FALSE
1190	CT12_TI3_1	771	G	13	103	12.6214	A	FALSE
1194	CT12_TI3_2	771	G	18	87	20.6897	A	FALSE
1198	CT12_TI3_3	771	G	16	98	16.3265	A	FALSE
1202	CT12_TI3_1	772	G	8	113	7.07965	C	FALSE
1203	CT12_TI3_1	772	T	1	113	0.884956	C	FALSE
1206	CT12_TI3_2	772	G	11	99	11.1111	C	FALSE
1210	CT12_TI3_3	772	G	11	126	8.73016	C	FALSE
1212	CT12_TI3_1	773	A	7	116	6.03448	G	FALSE
1216	CT12_TI3_2	773	A	9	101	8.91089	G	FALSE
1220	CT12_TI3_3	773	A	11	126	8.73016	G	FALSE
1224	CT12_TI3_1	774	A	1	115	0.869565	T	FALSE
1226	CT12_TI3_1	774	G	22	115	19.1304	T	FALSE
1228	CT12_TI3_2	774	A	1	102	0.980392	T	FALSE
1230	CT12_TI3_2	774	G	23	102	22.549	T	FALSE
1234	CT12_TI3_3	774	G	27	126	21.4286	T	FALSE
1239	CT12_TI3_1	775	T	23	115	20	A	FALSE
1241	CT12_TI3_2	775	C	1	102	0.980392	A	FALSE
1242	CT12_TI3_2	775	G	1	102	0.980392	A	FALSE
1243	CT12_TI3_2	775	T	23	102	22.549	A	FALSE
1247	CT12_TI3_3	775	T	27	126	21.4286	A	FALSE
1249	CT12_TI3_1	776	C	23	116	19.8276	T	FALSE
1250	CT12_TI3_1	776	G	1	116	0.862069	T	FALSE
1252	CT12_TI3_2	776	A	2	104	1.92308	T	FALSE
1253	CT12_TI3_2	776	C	24	104	23.0769	T	FALSE
1254	CT12_TI3_2	776	G	3	104	2.88462	T	FALSE
1256	CT12_TI3_3	776	A	3	126	2.38095	T	FALSE
1257	CT12_TI3_3	776	C	27	126	21.4286	T	FALSE
1261	CT12_TI3_1	777	C	23	116	19.8276	A	FALSE
1265	CT12_TI3_2	777	C	24	105	22.8571	A	FALSE
1266	CT12_TI3_2	777	G	2	105	1.90476	A	FALSE
1269	CT12_TI3_3	777	C	27	126	21.4286	A	FALSE
1270	CT12_TI3_3	777	G	1	126	0.793651	A	FALSE
1272	CT12_TI3_1	778	A	1	116	0.862069	T	FALSE
1273	CT12_TI3_1	778	C	35	116	30.1724	T	FALSE
1276	CT12_TI3_2	778	A	4	105	3.80952	T	FALSE
1277	CT12_TI3_2	778	C	35	105	33.3333	T	FALSE
1278	CT12_TI3_2	778	G	1	105	0.952381	T	FALSE
1281	CT12_TI3_3	778	C	50	126	39.6825	T	FALSE
1286	CT12_TI3_1	779	G	23	116	19.8276	C	FALSE
1288	CT12_TI3_2	779	A	1	105	0.952381	C	FALSE
1290	CT12_TI3_2	779	G	27	105	25.7143	C	FALSE
1294	CT12_TI3_3	779	G	28	127	22.0472	C	FALSE
1298	CT12_TI3_1	780	G	32	111	28.8288	A	FALSE
1302	CT12_TI3_2	780	G	26	105	24.7619	A	FALSE
1306	CT12_TI3_3	780	G	38	131	29.0076	A	FALSE
1310	CT12_TI3_1	781	G	32	111	28.8288	C	FALSE
1314	CT12_TI3_2	781	G	26	105	24.7619	C	FALSE
1318	CT12_TI3_3	781	G	33	128	25.7812	C	FALSE
1323	CT12_TI3_1	782	T	21	102	20.5882	C	FALSE
1324	CT12_TI3_2	782	A	3	103	2.91262	C	FALSE
1327	CT12_TI3_2	782	T	20	103	19.4175	C	FALSE
1328	CT12_TI3_3	782	A	2	124	1.6129	C	FALSE
1331	CT12_TI3_3	782	T	27	124	21.7742	C	FALSE
1332	CT12_TI3_1	783	A	11	94	11.7021	T	FALSE
1336	CT12_TI3_2	783	A	13	93	13.9785	T	FALSE
1337	CT12_TI3_2	783	C	3	93	3.22581	T	FALSE
1340	CT12_TI3_3	783	A	13	113	11.5044	T	FALSE
1341	CT12_TI3_3	783	C	1	113	0.884956	T	FALSE
1342	CT12_TI3_3	783	G	1	113	0.884956	T	FALSE
1345	CT12_TI3_1	784	C	4	94	4.25532	A	FALSE
1347	CT12_TI3_1	784	T	7	94	7.44681	A	FALSE
1349	CT12_TI3_2	784	C	9	93	9.67742	A	FALSE
1351	CT12_TI3_2	784	T	4	93	4.30108	A	FALSE
1353	CT12_TI3_3	784	C	7	111	6.30631	A	FALSE
1354	CT12_TI3_3	784	G	1	111	0.900901	A	FALSE
1355	CT12_TI3_3	784	T	7	111	6.30631	A	FALSE
1361	CT12_TI3_2	822	C	5	88	5.68182	A	FALSE
1374	CT12_TI3_2	852	G	6	116	5.17241	A	FALSE
1378	CT12_TI3_3	852	G	9	140	6.42857	A	FALSE
1385	CT12_TI3_2	853	C	11	120	9.16667	A	FALSE
1389	CT12_TI3_3	853	C	9	146	6.16438	A	FALSE
1397	CT12_TI3_2	854	C	1	121	0.826446	A	FALSE
1398	CT12_TI3_2	854	G	11	121	9.09091	A	FALSE
1402	CT12_TI3_3	854	G	19	150	12.6667	A	FALSE
1410	CT12_TI3_2	855	G	16	126	12.6984	A	FALSE
1411	CT12_TI3_2	855	T	2	126	1.5873	A	FALSE
1414	CT12_TI3_3	855	G	15	150	10	A	FALSE
1419	CT12_TI3_1	856	T	19	157	12.1019	A	FALSE
1423	CT12_TI3_2	856	T	35	149	23.4899	A	FALSE
1427	CT12_TI3_3	856	T	47	203	23.1527	A	FALSE
1428	CT12_TI3_1	857	A	21	168	12.5	C	FALSE
1431	CT12_TI3_1	857	T	1	168	0.595238	C	FALSE
1432	CT12_TI3_2	857	A	40	159	25.1572	C	FALSE
1435	CT12_TI3_2	857	T	2	159	1.25786	C	FALSE
1436	CT12_TI3_3	857	A	48	206	23.301	C	FALSE
1438	CT12_TI3_3	857	G	3	206	1.45631	C	FALSE
1439	CT12_TI3_3	857	T	2	206	0.970874	C	FALSE
1440	CT12_TI3_1	858	A	3	157	1.91083	T	FALSE
1441	CT12_TI3_1	858	C	24	157	15.2866	T	FALSE
1445	CT12_TI3_2	858	C	58	155	37.4194	T	FALSE
1449	CT12_TI3_3	858	C	74	229	32.3144	T	FALSE
1452	CT12_TI3_1	859	A	49	179	27.3743	T	FALSE
1456	CT12_TI3_2	859	A	92	179	51.3966	T	FALSE
1460	CT12_TI3_3	859	A	153	296	51.6892	T	FALSE
1464	CT12_TI3_1	860	A	2	212	0.943396	G	FALSE
1465	CT12_TI3_1	860	C	73	212	34.434	G	FALSE
1469	CT12_TI3_2	860	C	86	182	47.2527	G	FALSE
1472	CT12_TI3_3	860	A	1	318	0.314465	G	FALSE
1473	CT12_TI3_3	860	C	164	318	51.5723	G	FALSE
1476	CT12_TI3_1	866	A	45	78	57.6923	G	FALSE
1477	CT12_TI3_1	866	C	5	78	6.41026	G	FALSE
1479	CT12_TI3_1	866	T	21	78	26.9231	G	FALSE
1480	CT12_TI3_2	866	A	20	60	33.3333	G	FALSE
1481	CT12_TI3_2	866	C	18	60	30	G	FALSE
1483	CT12_TI3_2	866	T	22	60	36.6667	G	FALSE
1484	CT12_TI3_3	866	A	30	78	38.4615	G	FALSE
1485	CT12_TI3_3	866	C	25	78	32.0513	G	FALSE
1487	CT12_TI3_3	866	T	22	78	28.2051	G	FALSE
1488	CT12_TI3_1	867	A	23	87	26.4368	T	FALSE
1489	CT12_TI3_1	867	C	2	87	2.29885	T	FALSE
1490	CT12_TI3_1	867	G	18	87	20.6897	T	FALSE
1492	CT12_TI3_2	867	A	12	61	19.6721	T	FALSE
1494	CT12_TI3_2	867	G	20	61	32.7869	T	FALSE
1496	CT12_TI3_3	867	A	6	88	6.81818	T	FALSE
1497	CT12_TI3_3	867	C	2	88	2.27273	T	FALSE
1498	CT12_TI3_3	867	G	18	88	20.4545	T	FALSE
1502	CT12_TI3_1	868	G	11	90	12.2222	C	FALSE
1503	CT12_TI3_1	868	T	44	90	48.8889	C	FALSE
1506	CT12_TI3_2	868	G	3	61	4.91803	C	FALSE
1507	CT12_TI3_2	868	T	20	61	32.7869	C	FALSE
1508	CT12_TI3_3	868	A	3	89	3.37079	C	FALSE
1510	CT12_TI3_3	868	G	5	89	5.61798	C	FALSE
1511	CT12_TI3_3	868	T	42	89	47.191	C	FALSE
1514	CT12_TI3_1	869	G	1	92	1.08696	A	FALSE
1515	CT12_TI3_1	869	T	6	92	6.52174	A	FALSE
1519	CT12_TI3_2	869	T	8	61	13.1148	A	FALSE
1523	CT12_TI3_3	869	T	17	89	19.1011	A	FALSE
1524	CT12_TI3_1	870	A	15	190	7.89474	C	FALSE
1528	CT12_TI3_2	870	A	21	184	11.413	C	FALSE
1532	CT12_TI3_3	870	A	33	272	12.1324	C	FALSE
1540	CT12_TI3_2	871	A	14	178	7.86517	G	FALSE
1543	CT12_TI3_2	871	T	1	178	0.561798	G	FALSE
1544	CT12_TI3_3	871	A	23	256	8.98438	G	FALSE
1547	CT12_TI3_3	871	T	2	256	0.78125	G	FALSE
1552	CT12_TI3_2	877	A	8	137	5.83942	C	FALSE
1565	CT12_TI3_2	878	C	15	146	10.274	G	FALSE
1567	CT12_TI3_2	878	T	2	146	1.36986	G	FALSE
1572	CT12_TI3_1	879	A	1	210	0.47619	C	FALSE
1575	CT12_TI3_1	879	T	23	210	10.9524	C	FALSE
1576	CT12_TI3_2	879	A	1	163	0.613497	C	FALSE
1579	CT12_TI3_2	879	T	14	163	8.58896	C	FALSE
1584	CT12_TI3_1	880	A	11	184	5.97826	G	FALSE
1587	CT12_TI3_1	880	T	1	184	0.543478	G	FALSE
1588	CT12_TI3_2	880	A	10	151	6.62252	G	FALSE
1589	CT12_TI3_2	880	C	1	151	0.662252	G	FALSE
1591	CT12_TI3_2	880	T	2	151	1.3245	G	FALSE
1601	CT12_TI3_2	881	C	1	148	0.675676	A	FALSE
1602	CT12_TI3_2	881	G	6	148	4.05405	A	FALSE
1603	CT12_TI3_2	881	T	1	148	0.675676	A	FALSE
1608	CT12_TI3_1	882	A	6	175	3.42857	T	FALSE
1610	CT12_TI3_1	882	G	6	175	3.42857	T	FALSE
1612	CT12_TI3_2	882	A	8	155	5.16129	T	FALSE
1614	CT12_TI3_2	882	G	2	155	1.29032	T	FALSE
1624	CT12_TI3_2	884	A	10	163	6.13497	T	FALSE
1628	CT12_TI3_3	884	A	10	241	4.14938	T	FALSE
1629	CT12_TI3_3	884	C	2	241	0.829876	T	FALSE
1630	CT12_TI3_3	884	G	2	241	0.829876	T	FALSE
1636	CT12_TI3_2	885	A	1	163	0.613497	T	FALSE
1637	CT12_TI3_2	885	C	11	163	6.74847	T	FALSE
1649	CT12_TI3_2	886	C	1	164	0.609756	A	FALSE
1650	CT12_TI3_2	886	G	13	164	7.92683	A	FALSE
1654	CT12_TI3_3	886	G	16	243	6.58436	A	FALSE
1655	CT12_TI3_3	886	T	1	243	0.411523	A	FALSE
1661	CT12_TI3_2	887	C	9	186	4.83871	G	FALSE
1663	CT12_TI3_2	887	T	2	186	1.07527	G	FALSE
1674	CT12_TI3_2	889	G	9	167	5.38922	A	FALSE
1685	CT12_TI3_2	920	C	7	134	5.22388	A	FALSE
1693	CT12_TI3_1	921	C	21	134	15.6716	G	FALSE
1697	CT12_TI3_2	921	C	17	140	12.1429	G	FALSE
1701	CT12_TI3_3	921	C	41	248	16.5323	G	FALSE
1704	CT12_TI3_1	922	A	7	132	5.30303	T	FALSE
1705	CT12_TI3_1	922	C	11	132	8.33333	T	FALSE
1706	CT12_TI3_1	922	G	1	132	0.757576	T	FALSE
1708	CT12_TI3_2	922	A	12	140	8.57143	T	FALSE
1709	CT12_TI3_2	922	C	8	140	5.71429	T	FALSE
1712	CT12_TI3_3	922	A	22	247	8.90688	T	FALSE
1713	CT12_TI3_3	922	C	16	247	6.47773	T	FALSE
1714	CT12_TI3_3	922	G	1	247	0.404858	T	FALSE
1722	CT12_TI3_2	932	G	1	78	1.28205	A	FALSE
1723	CT12_TI3_2	932	T	4	78	5.12821	A	FALSE
1733	CT12_TI3_2	933	C	4	71	5.6338	A	FALSE
1734	CT12_TI3_2	933	G	1	71	1.40845	A	FALSE
1744	CT12_TI3_2	937	A	8	119	6.72269	C	FALSE
1746	CT12_TI3_2	937	G	1	119	0.840336	C	FALSE
1755	CT12_TI3_1	974	T	17	77	22.0779	C	FALSE
1759	CT12_TI3_2	974	T	27	76	35.5263	C	FALSE
1763	CT12_TI3_3	974	T	14	82	17.0732	C	FALSE
1767	CT12_TI3_1	975	T	17	97	17.5258	C	FALSE
1771	CT12_TI3_2	975	T	34	118	28.8136	C	FALSE
1775	CT12_TI3_3	975	T	29	139	20.8633	C	FALSE
1776	CT12_TI3_1	976	A	40	199	20.1005	G	FALSE
1780	CT12_TI3_2	976	A	55	178	30.8989	G	FALSE
1784	CT12_TI3_3	976	A	62	260	23.8462	G	FALSE
1790	CT12_TI3_1	977	G	37	199	18.593	A	FALSE
1794	CT12_TI3_2	977	G	53	188	28.1915	A	FALSE
1798	CT12_TI3_3	977	G	62	293	21.1604	A	FALSE
1800	CT12_TI3_1	978	A	4	200	2	G	FALSE
1801	CT12_TI3_1	978	C	29	200	14.5	G	FALSE
1804	CT12_TI3_2	978	A	5	190	2.63158	G	FALSE
1805	CT12_TI3_2	978	C	48	190	25.2632	G	FALSE
1808	CT12_TI3_3	978	A	4	293	1.36519	G	FALSE
1809	CT12_TI3_3	978	C	58	293	19.7952	G	FALSE
1815	CT12_TI3_1	979	T	33	200	16.5	A	FALSE
1817	CT12_TI3_2	979	C	2	189	1.0582	A	FALSE
1819	CT12_TI3_2	979	T	47	189	24.8677	A	FALSE
1823	CT12_TI3_3	979	T	58	293	19.7952	A	FALSE
1824	CT12_TI3_1	980	A	30	201	14.9254	C	FALSE
1826	CT12_TI3_1	980	G	4	201	1.99005	C	FALSE
1828	CT12_TI3_2	980	A	47	191	24.6073	C	FALSE
1832	CT12_TI3_3	980	A	59	295	20	C	FALSE
1836	CT12_TI3_1	981	A	33	199	16.5829	G	FALSE
1837	CT12_TI3_1	981	C	5	199	2.51256	G	FALSE
1839	CT12_TI3_1	981	T	2	199	1.00503	G	FALSE
1840	CT12_TI3_2	981	A	47	199	23.6181	G	FALSE
1841	CT12_TI3_2	981	C	1	199	0.502513	G	FALSE
1843	CT12_TI3_2	981	T	5	199	2.51256	G	FALSE
1844	CT12_TI3_3	981	A	58	307	18.8925	G	FALSE
1845	CT12_TI3_3	981	C	4	307	1.30293	G	FALSE
1848	CT12_TI3_1	982	A	14	180	7.77778	G	FALSE
1852	CT12_TI3_2	982	A	26	194	13.4021	G	FALSE
1856	CT12_TI3_3	982	A	46	290	15.8621	G	FALSE
1857	CT12_TI3_3	982	C	2	290	0.689655	G	FALSE
1861	CT12_TI3_1	983	C	18	181	9.94475	A	FALSE
1863	CT12_TI3_1	983	T	1	181	0.552486	A	FALSE
1865	CT12_TI3_2	983	C	27	200	13.5	A	FALSE
1869	CT12_TI3_3	983	C	46	297	15.4882	A	FALSE
1873	CT12_TI3_1	984	C	18	184	9.78261	T	FALSE
1876	CT12_TI3_2	984	A	1	202	0.49505	T	FALSE
1877	CT12_TI3_2	984	C	26	202	12.8713	T	FALSE
1881	CT12_TI3_3	984	C	46	304	15.1316	T	FALSE
1882	CT12_TI3_3	984	G	2	304	0.657895	T	FALSE
1884	CT12_TI3_1	985	A	1	182	0.549451	C	FALSE
1887	CT12_TI3_1	985	T	14	182	7.69231	C	FALSE
1890	CT12_TI3_2	985	G	3	200	1.5	C	FALSE
1891	CT12_TI3_2	985	T	23	200	11.5	C	FALSE
1892	CT12_TI3_3	985	A	1	308	0.324675	C	FALSE
1894	CT12_TI3_3	985	G	3	308	0.974026	C	FALSE
1895	CT12_TI3_3	985	T	45	308	14.6104	C	FALSE
1897	CT12_TI3_1	986	C	14	172	8.13953	A	FALSE
1901	CT12_TI3_2	986	C	17	180	9.44444	A	FALSE
1903	CT12_TI3_2	986	T	1	180	0.555556	A	FALSE
1905	CT12_TI3_3	986	C	36	293	12.2867	A	FALSE
1908	CT12_TI3_1	987	A	1	228	0.438596	C	FALSE
1910	CT12_TI3_1	987	G	12	228	5.26316	C	FALSE
1912	CT12_TI3_2	987	A	1	163	0.613497	C	FALSE
1914	CT12_TI3_2	987	G	10	163	6.13497	C	FALSE
1918	CT12_TI3_3	987	G	27	268	10.0746	C	FALSE
1920	CT12_TI3_1	988	A	2	181	1.10497	T	FALSE
1921	CT12_TI3_1	988	C	12	181	6.62983	T	FALSE
1924	CT12_TI3_2	988	A	1	117	0.854701	T	FALSE
1925	CT12_TI3_2	988	C	9	117	7.69231	T	FALSE
1926	CT12_TI3_2	988	G	2	117	1.7094	T	FALSE
1928	CT12_TI3_3	988	A	3	346	0.867052	T	FALSE
1929	CT12_TI3_3	988	C	11	346	3.17919	T	FALSE
1930	CT12_TI3_3	988	G	10	346	2.89017	T	FALSE
1936	CT12_TI3_2	989	A	3	117	2.5641	T	FALSE
1937	CT12_TI3_2	989	C	6	117	5.12821	T	FALSE
1940	CT12_TI3_3	989	A	3	346	0.867052	T	FALSE
1941	CT12_TI3_3	989	C	16	346	4.62428	T	FALSE
1942	CT12_TI3_3	989	G	4	346	1.15607	T	FALSE
1948	CT12_TI3_2	1027	A	2	153	1.30719	G	FALSE
1949	CT12_TI3_2	1027	C	6	153	3.92157	G	FALSE
1960	CT12_TI3_2	1028	A	13	231	5.62771	C	FALSE
1964	CT12_TI3_3	1028	A	27	284	9.50704	C	FALSE
1967	CT12_TI3_3	1028	T	1	284	0.352113	C	FALSE
1969	CT12_TI3_1	1029	C	2	198	1.0101	G	FALSE
1971	CT12_TI3_1	1029	T	9	198	4.54545	G	FALSE
1975	CT12_TI3_2	1029	T	22	217	10.1382	G	FALSE
1979	CT12_TI3_3	1029	T	25	273	9.15751	G	FALSE
1985	CT12_TI3_2	1030	C	1	212	0.471698	G	FALSE
1987	CT12_TI3_2	1030	T	13	212	6.13208	G	FALSE
1989	CT12_TI3_3	1030	C	2	268	0.746269	G	FALSE
1991	CT12_TI3_3	1030	T	20	268	7.46269	G	FALSE
1992	CT12_TI3_1	1031	A	11	210	5.2381	C	FALSE
1996	CT12_TI3_2	1031	A	15	204	7.35294	C	FALSE
2000	CT12_TI3_3	1031	A	20	273	7.32601	C	FALSE
2002	CT12_TI3_3	1031	G	1	273	0.3663	C	FALSE
2003	CT12_TI3_3	1031	T	1	273	0.3663	C	FALSE
2009	CT12_TI3_2	1032	C	3	191	1.57068	A	FALSE
2010	CT12_TI3_2	1032	G	3	191	1.57068	A	FALSE
2011	CT12_TI3_2	1032	T	9	191	4.71204	A	FALSE
2023	CT12_TI3_2	1033	T	17	182	9.34066	G	FALSE
2025	CT12_TI3_3	1033	C	4	258	1.55039	G	FALSE
2027	CT12_TI3_3	1033	T	26	258	10.0775	G	FALSE
2028	CT12_TI3_1	1034	A	1	192	0.520833	G	FALSE
2029	CT12_TI3_1	1034	C	2	192	1.04167	G	FALSE
2031	CT12_TI3_1	1034	T	9	192	4.6875	G	FALSE
2033	CT12_TI3_2	1034	C	1	186	0.537634	G	FALSE
2035	CT12_TI3_2	1034	T	11	186	5.91398	G	FALSE
2037	CT12_TI3_3	1034	C	5	255	1.96078	G	FALSE
2039	CT12_TI3_3	1034	T	20	255	7.84314	G	FALSE
2041	CT12_TI3_1	1035	C	5	212	2.35849	G	FALSE
2043	CT12_TI3_1	1035	T	9	212	4.24528	G	FALSE
2047	CT12_TI3_2	1035	T	15	198	7.57576	G	FALSE
2048	CT12_TI3_3	1035	A	1	246	0.406504	G	FALSE
2049	CT12_TI3_3	1035	C	3	246	1.21951	G	FALSE
2051	CT12_TI3_3	1035	T	14	246	5.69106	G	FALSE
2053	CT12_TI3_1	1036	C	23	240	9.58333	A	FALSE
2057	CT12_TI3_2	1036	C	11	189	5.82011	A	FALSE
2061	CT12_TI3_3	1036	C	18	268	6.71642	A	FALSE
2064	CT12_TI3_1	1037	A	21	134	15.6716	T	FALSE
2068	CT12_TI3_2	1037	A	19	128	14.8438	T	FALSE
2072	CT12_TI3_3	1037	A	19	169	11.2426	T	FALSE
2079	CT12_TI3_1	1038	T	9	135	6.66667	G	FALSE
2083	CT12_TI3_2	1038	T	11	126	8.73016	G	FALSE
2087	CT12_TI3_3	1038	T	13	171	7.60234	G	FALSE
2091	CT12_TI3_1	1039	T	12	133	9.02256	G	FALSE
2095	CT12_TI3_2	1039	T	11	129	8.52713	G	FALSE
2099	CT12_TI3_3	1039	T	10	167	5.98802	G	FALSE
2103	CT12_TI3_1	1040	T	11	137	8.0292	G	FALSE
2107	CT12_TI3_2	1040	T	9	130	6.92308	G	FALSE
2111	CT12_TI3_3	1040	T	11	166	6.62651	G	FALSE
2112	CT12_TI3_1	1041	A	15	143	10.4895	C	FALSE
2116	CT12_TI3_2	1041	A	9	141	6.38298	C	FALSE
2120	CT12_TI3_3	1041	A	10	177	5.64972	C	FALSE
2124	CT12_TI3_1	1042	A	10	150	6.66667	T	FALSE
2128	CT12_TI3_2	1042	A	10	125	8	T	FALSE
2130	CT12_TI3_2	1042	G	1	125	0.8	T	FALSE
2132	CT12_TI3_3	1042	A	11	187	5.88235	T	FALSE
2134	CT12_TI3_3	1042	G	1	187	0.534759	T	FALSE
2136	CT12_TI3_1	1043	A	8	144	5.55556	T	FALSE
2137	CT12_TI3_1	1043	C	1	144	0.694444	T	FALSE
2140	CT12_TI3_2	1043	A	12	121	9.91736	T	FALSE
2144	CT12_TI3_3	1043	A	13	186	6.98925	T	FALSE
2155	CT12_TI3_2	1044	T	9	116	7.75862	G	FALSE
2159	CT12_TI3_3	1044	T	10	168	5.95238	G	FALSE
2165	CT12_TI3_2	1045	C	1	116	0.862069	A	FALSE
2166	CT12_TI3_2	1045	G	2	116	1.72414	A	FALSE
2167	CT12_TI3_2	1045	T	3	116	2.58621	A	FALSE
2172	CT12_TI3_1	1046	A	8	118	6.77966	C	FALSE
2176	CT12_TI3_2	1046	A	10	113	8.84956	C	FALSE
2178	CT12_TI3_2	1046	G	1	113	0.884956	C	FALSE
2180	CT12_TI3_3	1046	A	12	172	6.97674	C	FALSE
2184	CT12_TI3_1	1058	A	11	196	5.61224	T	FALSE
2186	CT12_TI3_1	1058	G	7	196	3.57143	T	FALSE
2188	CT12_TI3_2	1058	A	8	169	4.73373	T	FALSE
2190	CT12_TI3_2	1058	G	6	169	3.5503	T	FALSE
2192	CT12_TI3_3	1058	A	8	257	3.11284	T	FALSE
2194	CT12_TI3_3	1058	G	12	257	4.66926	T	FALSE
2203	CT12_TI3_2	1059	T	10	177	5.64972	G	FALSE
2212	CT12_TI3_2	1060	A	12	174	6.89655	C	FALSE
2214	CT12_TI3_2	1060	G	1	174	0.574713	C	FALSE
2224	CT12_TI3_2	1061	A	8	178	4.49438	C	FALSE
2226	CT12_TI3_2	1061	G	1	178	0.561798	C	FALSE
2233	CT12_TI3_1	1062	C	17	251	6.77291	A	FALSE
2234	CT12_TI3_1	1062	G	2	251	0.796813	A	FALSE
2235	CT12_TI3_1	1062	T	1	251	0.398406	A	FALSE
2237	CT12_TI3_2	1062	C	15	197	7.61421	A	FALSE
2241	CT12_TI3_3	1062	C	17	302	5.62914	A	FALSE
2243	CT12_TI3_3	1062	T	1	302	0.331126	A	FALSE
2249	CT12_TI3_2	1075	C	7	144	4.86111	A	FALSE
2250	CT12_TI3_2	1075	G	1	144	0.694444	A	FALSE
2251	CT12_TI3_2	1075	T	3	144	2.08333	A	FALSE
2261	CT12_TI3_2	1076	C	3	159	1.88679	A	FALSE
2263	CT12_TI3_2	1076	T	6	159	3.77358	A	FALSE
2273	CT12_TI3_2	1077	C	1	162	0.617284	T	FALSE
2274	CT12_TI3_2	1077	G	8	162	4.93827	T	FALSE
2280	CT12_TI3_1	1087	A	36	268	13.4328	C	FALSE
2282	CT12_TI3_1	1087	G	1	268	0.373134	C	FALSE
2284	CT12_TI3_2	1087	A	42	216	19.4444	C	FALSE
2286	CT12_TI3_2	1087	G	3	216	1.38889	C	FALSE
2288	CT12_TI3_3	1087	A	42	249	16.8675	C	FALSE
2290	CT12_TI3_3	1087	G	3	249	1.20482	C	FALSE
2292	CT12_TI3_1	1088	A	26	248	10.4839	C	FALSE
2295	CT12_TI3_1	1088	T	1	248	0.403226	C	FALSE
2296	CT12_TI3_2	1088	A	27	217	12.4424	C	FALSE
2300	CT12_TI3_3	1088	A	23	254	9.05512	C	FALSE
2302	CT12_TI3_3	1088	G	2	254	0.787402	C	FALSE
2308	CT12_TI3_2	1089	A	16	203	7.88177	T	FALSE
2310	CT12_TI3_2	1089	G	1	203	0.492611	T	FALSE
2316	CT12_TI3_1	1090	A	13	255	5.09804	T	FALSE
2317	CT12_TI3_1	1090	C	2	255	0.784314	T	FALSE
2320	CT12_TI3_2	1090	A	20	217	9.21659	T	FALSE
2324	CT12_TI3_3	1090	A	20	250	8	T	FALSE
2326	CT12_TI3_3	1090	G	3	250	1.2	T	FALSE
2328	CT12_TI3_1	1091	A	23	287	8.01394	C	FALSE
2332	CT12_TI3_2	1091	A	32	237	13.5021	C	FALSE
2334	CT12_TI3_2	1091	G	2	237	0.843882	C	FALSE
2336	CT12_TI3_3	1091	A	25	275	9.09091	C	FALSE
2340	CT12_TI3_1	1092	A	19	301	6.31229	C	FALSE
2344	CT12_TI3_2	1092	A	23	220	10.4545	C	FALSE
2346	CT12_TI3_2	1092	G	3	220	1.36364	C	FALSE
2348	CT12_TI3_3	1092	A	18	246	7.31707	C	FALSE
2356	CT12_TI3_2	1093	A	1	217	0.460829	G	FALSE
2357	CT12_TI3_2	1093	C	1	217	0.460829	G	FALSE
2359	CT12_TI3_2	1093	T	10	217	4.60829	G	FALSE
2370	CT12_TI3_2	1098	G	10	179	5.58659	T	FALSE
2378	CT12_TI3_1	1126	G	15	255	5.88235	T	FALSE
2382	CT12_TI3_2	1126	G	11	198	5.55556	T	FALSE
2386	CT12_TI3_3	1126	G	20	287	6.96864	T	FALSE
2392	CT12_TI3_2	1130	A	2	179	1.11732	T	FALSE
2393	CT12_TI3_2	1130	C	7	179	3.91061	T	FALSE
2404	CT12_TI3_2	1133	A	1	134	0.746269	T	FALSE
2405	CT12_TI3_2	1133	C	6	134	4.47761	T	FALSE
2417	CT12_TI3_2	1138	C	13	193	6.73575	T	FALSE
2428	CT12_TI3_2	1139	A	10	188	5.31915	T	FALSE
2441	CT12_TI3_2	1140	C	6	217	2.76498	G	FALSE
2443	CT12_TI3_2	1140	T	10	217	4.60829	G	FALSE
2450	CT12_TI3_1	1141	G	26	356	7.30337	A	FALSE
2453	CT12_TI3_2	1141	C	1	223	0.44843	A	FALSE
2454	CT12_TI3_2	1141	G	12	223	5.38117	A	FALSE
2457	CT12_TI3_3	1141	C	1	394	0.253807	A	FALSE
2458	CT12_TI3_3	1141	G	25	394	6.34518	A	FALSE
2462	CT12_TI3_1	1142	G	49	366	13.388	A	FALSE
2463	CT12_TI3_1	1142	T	1	366	0.273224	A	FALSE
2466	CT12_TI3_2	1142	G	49	234	20.9402	A	FALSE
2469	CT12_TI3_3	1142	C	1	401	0.249377	A	FALSE
2470	CT12_TI3_3	1142	G	79	401	19.7007	A	FALSE
2471	CT12_TI3_3	1142	T	1	401	0.249377	A	FALSE
2473	CT12_TI3_1	1143	C	1	364	0.274725	A	FALSE
2475	CT12_TI3_1	1143	T	76	364	20.8791	A	FALSE
2477	CT12_TI3_2	1143	C	1	242	0.413223	A	FALSE
2479	CT12_TI3_2	1143	T	83	242	34.2975	A	FALSE
2481	CT12_TI3_3	1143	C	3	428	0.700935	A	FALSE
2483	CT12_TI3_3	1143	T	125	428	29.2056	A	FALSE
2486	CT12_TI3_1	1144	G	330	557	59.246	A	FALSE
2490	CT12_TI3_2	1144	G	258	436	59.1743	A	FALSE
2494	CT12_TI3_3	1144	G	325	654	49.6942	A	FALSE
2498	CT12_TI3_1	1145	G	1	538	0.185874	C	FALSE
2499	CT12_TI3_1	1145	T	317	538	58.9219	C	FALSE
2502	CT12_TI3_2	1145	G	1	441	0.226757	C	FALSE
2503	CT12_TI3_2	1145	T	269	441	60.9977	C	FALSE
2507	CT12_TI3_3	1145	T	336	687	48.9083	C	FALSE
2508	CT12_TI3_1	1146	A	2	547	0.365631	T	FALSE
2509	CT12_TI3_1	1146	C	320	547	58.5009	T	FALSE
2513	CT12_TI3_2	1146	C	275	446	61.6592	T	FALSE
2517	CT12_TI3_3	1146	C	345	700	49.2857	T	FALSE
2520	CT12_TI3_1	1147	A	357	604	59.106	G	FALSE
2521	CT12_TI3_1	1147	C	1	604	0.165563	G	FALSE
2524	CT12_TI3_2	1147	A	280	466	60.0858	G	FALSE
2528	CT12_TI3_3	1147	A	369	735	50.2041	G	FALSE
2529	CT12_TI3_3	1147	C	1	735	0.136054	G	FALSE
2531	CT12_TI3_3	1147	T	3	735	0.408163	G	FALSE
2532	CT12_TI3_1	1148	A	42	146	28.7671	G	FALSE
2533	CT12_TI3_1	1148	C	14	146	9.58904	G	FALSE
2535	CT12_TI3_1	1148	T	39	146	26.7123	G	FALSE
2536	CT12_TI3_2	1148	A	13	95	13.6842	G	FALSE
2537	CT12_TI3_2	1148	C	12	95	12.6316	G	FALSE
2539	CT12_TI3_2	1148	T	32	95	33.6842	G	FALSE
2540	CT12_TI3_3	1148	A	45	172	26.1628	G	FALSE
2541	CT12_TI3_3	1148	C	34	172	19.7674	G	FALSE
2543	CT12_TI3_3	1148	T	40	172	23.2558	G	FALSE
2544	CT12_TI3_1	1149	A	22	145	15.1724	G	FALSE
2545	CT12_TI3_1	1149	C	4	145	2.75862	G	FALSE
2547	CT12_TI3_1	1149	T	48	145	33.1034	G	FALSE
2548	CT12_TI3_2	1149	A	9	95	9.47368	G	FALSE
2549	CT12_TI3_2	1149	C	5	95	5.26316	G	FALSE
2551	CT12_TI3_2	1149	T	28	95	29.4737	G	FALSE
2552	CT12_TI3_3	1149	A	29	169	17.1598	G	FALSE
2553	CT12_TI3_3	1149	C	18	169	10.6509	G	FALSE
2555	CT12_TI3_3	1149	T	42	169	24.8521	G	FALSE
2556	CT12_TI3_1	1150	A	85	143	59.4406	T	FALSE
2557	CT12_TI3_1	1150	C	30	143	20.979	T	FALSE
2558	CT12_TI3_1	1150	G	1	143	0.699301	T	FALSE
2560	CT12_TI3_2	1150	A	59	86	68.6047	T	FALSE
2561	CT12_TI3_2	1150	C	14	86	16.2791	T	FALSE
2564	CT12_TI3_3	1150	A	75	162	46.2963	T	FALSE
2565	CT12_TI3_3	1150	C	36	162	22.2222	T	FALSE
2573	CT12_TI3_2	1155	C	1	175	0.571429	A	FALSE
2574	CT12_TI3_2	1155	G	9	175	5.14286	A	FALSE
2577	CT12_TI3_3	1155	C	2	295	0.677966	A	FALSE
2578	CT12_TI3_3	1155	G	14	295	4.74576	A	FALSE
2581	CT12_TI3_1	1156	C	10	183	5.46448	T	FALSE
2582	CT12_TI3_1	1156	G	1	183	0.546448	T	FALSE
2585	CT12_TI3_2	1156	C	9	175	5.14286	T	FALSE
2589	CT12_TI3_3	1156	C	18	300	6	T	FALSE
2590	CT12_TI3_3	1156	G	3	300	1	T	FALSE
2593	CT12_TI3_1	1157	C	25	200	12.5	A	FALSE
2595	CT12_TI3_1	1157	T	1	200	0.5	A	FALSE
2597	CT12_TI3_2	1157	C	23	190	12.1053	A	FALSE
2601	CT12_TI3_3	1157	C	29	305	9.5082	A	FALSE
2602	CT12_TI3_3	1157	G	1	305	0.327869	A	FALSE
2603	CT12_TI3_3	1157	T	1	305	0.327869	A	FALSE
2606	CT12_TI3_1	1158	G	1	198	0.505051	A	FALSE
2607	CT12_TI3_1	1158	T	26	198	13.1313	A	FALSE
2609	CT12_TI3_2	1158	C	1	177	0.564972	A	FALSE
2611	CT12_TI3_2	1158	T	24	177	13.5593	A	FALSE
2613	CT12_TI3_3	1158	C	1	309	0.323625	A	FALSE
2615	CT12_TI3_3	1158	T	41	309	13.2686	A	FALSE
2617	CT12_TI3_1	1159	C	21	210	10	A	FALSE
2619	CT12_TI3_1	1159	T	1	210	0.47619	A	FALSE
2621	CT12_TI3_2	1159	C	21	178	11.7978	A	FALSE
2622	CT12_TI3_2	1159	G	1	178	0.561798	A	FALSE
2625	CT12_TI3_3	1159	C	38	326	11.6564	A	FALSE
2627	CT12_TI3_3	1159	T	2	326	0.613497	A	FALSE
2629	CT12_TI3_1	1160	C	2	214	0.934579	A	FALSE
2631	CT12_TI3_1	1160	T	24	214	11.215	A	FALSE
2635	CT12_TI3_2	1160	T	28	185	15.1351	A	FALSE
2637	CT12_TI3_3	1160	C	2	334	0.598802	A	FALSE
2638	CT12_TI3_3	1160	G	1	334	0.299401	A	FALSE
2639	CT12_TI3_3	1160	T	41	334	12.2754	A	FALSE
2640	CT12_TI3_1	1161	A	1	223	0.44843	G	FALSE
2641	CT12_TI3_1	1161	C	4	223	1.79372	G	FALSE
2643	CT12_TI3_1	1161	T	24	223	10.7623	G	FALSE
2645	CT12_TI3_2	1161	C	6	201	2.98507	G	FALSE
2647	CT12_TI3_2	1161	T	5	201	2.48756	G	FALSE
2649	CT12_TI3_3	1161	C	6	353	1.69972	G	FALSE
2651	CT12_TI3_3	1161	T	21	353	5.94901	G	FALSE
2653	CT12_TI3_1	1162	C	5	231	2.1645	G	FALSE
2655	CT12_TI3_1	1162	T	33	231	14.2857	G	FALSE
2656	CT12_TI3_2	1162	A	1	207	0.483092	G	FALSE
2657	CT12_TI3_2	1162	C	5	207	2.41546	G	FALSE
2659	CT12_TI3_2	1162	T	38	207	18.3575	G	FALSE
2661	CT12_TI3_3	1162	C	5	398	1.25628	G	FALSE
2663	CT12_TI3_3	1162	T	71	398	17.8392	G	FALSE
2665	CT12_TI3_1	1163	C	1	230	0.434783	G	FALSE
2667	CT12_TI3_1	1163	T	24	230	10.4348	G	FALSE
2668	CT12_TI3_2	1163	A	6	204	2.94118	G	FALSE
2671	CT12_TI3_2	1163	T	12	204	5.88235	G	FALSE
2672	CT12_TI3_3	1163	A	5	386	1.29534	G	FALSE
2675	CT12_TI3_3	1163	T	39	386	10.1036	G	FALSE
2678	CT12_TI3_1	1164	G	190	367	51.7711	A	FALSE
2679	CT12_TI3_1	1164	T	2	367	0.544959	A	FALSE
2682	CT12_TI3_2	1164	G	129	259	49.8069	A	FALSE
2686	CT12_TI3_3	1164	G	231	503	45.9245	A	FALSE
2689	CT12_TI3_1	1165	C	1	376	0.265957	A	FALSE
2691	CT12_TI3_1	1165	T	202	376	53.7234	A	FALSE
2695	CT12_TI3_2	1165	T	138	273	50.5495	A	FALSE
2699	CT12_TI3_3	1165	T	239	513	46.5887	A	FALSE
2701	CT12_TI3_1	1166	C	11	78	14.1026	G	FALSE
2703	CT12_TI3_1	1166	T	3	78	3.84615	G	FALSE
2705	CT12_TI3_2	1166	C	8	71	11.2676	G	FALSE
2712	CT12_TI3_1	1167	A	11	78	14.1026	T	FALSE
2713	CT12_TI3_1	1167	C	1	78	1.28205	T	FALSE
2714	CT12_TI3_1	1167	G	2	78	2.5641	T	FALSE
2716	CT12_TI3_2	1167	A	8	71	11.2676	T	FALSE
2718	CT12_TI3_2	1167	G	3	71	4.22535	T	FALSE
2725	CT12_TI3_1	1168	C	2	78	2.5641	A	FALSE
2726	CT12_TI3_1	1168	G	8	78	10.2564	A	FALSE
2727	CT12_TI3_1	1168	T	3	78	3.84615	A	FALSE
2729	CT12_TI3_2	1168	C	19	71	26.7606	A	FALSE
2730	CT12_TI3_2	1168	G	9	71	12.6761	A	FALSE
2731	CT12_TI3_2	1168	T	1	71	1.40845	A	FALSE
2733	CT12_TI3_3	1168	C	20	105	19.0476	A	FALSE
2734	CT12_TI3_3	1168	G	7	105	6.66667	A	FALSE
2735	CT12_TI3_3	1168	T	7	105	6.66667	A	FALSE
2736	CT12_TI3_1	1169	A	1	72	1.38889	G	FALSE
2737	CT12_TI3_1	1169	C	35	72	48.6111	G	FALSE
2739	CT12_TI3_1	1169	T	7	72	9.72222	G	FALSE
2740	CT12_TI3_2	1169	A	1	68	1.47059	G	FALSE
2741	CT12_TI3_2	1169	C	9	68	13.2353	G	FALSE
2743	CT12_TI3_2	1169	T	19	68	27.9412	G	FALSE
2744	CT12_TI3_3	1169	A	6	98	6.12245	G	FALSE
2745	CT12_TI3_3	1169	C	30	98	30.6122	G	FALSE
2747	CT12_TI3_3	1169	T	17	98	17.3469	G	FALSE
2748	CT12_TI3_1	1190	A	5	217	2.30415	T	FALSE
2749	CT12_TI3_1	1190	C	75	217	34.5622	T	FALSE
2750	CT12_TI3_1	1190	G	1	217	0.460829	T	FALSE
2753	CT12_TI3_2	1190	C	36	125	28.8	T	FALSE
2754	CT12_TI3_2	1190	G	1	125	0.8	T	FALSE
2757	CT12_TI3_3	1190	C	83	193	43.0052	T	FALSE
2766	CT12_TI3_2	1220	G	6	113	5.30973	T	FALSE
2778	CT12_TI3_2	1221	G	6	106	5.66038	T	FALSE
2788	CT12_TI3_2	1222	A	6	105	5.71429	G	FALSE
2802	CT12_TI3_2	1223	G	6	106	5.66038	T	FALSE
2815	CT12_TI3_2	1224	T	6	107	5.60748	A	FALSE
2826	CT12_TI3_2	1225	G	6	110	5.45455	A	FALSE
2839	CT12_TI3_2	1226	T	6	110	5.45455	A	FALSE
2848	CT12_TI3_2	1227	A	6	116	5.17241	T	FALSE
2860	CT12_TI3_2	1228	A	6	116	5.17241	G	FALSE
2874	CT12_TI3_2	1229	G	6	112	5.35714	T	FALSE
2887	CT12_TI3_2	1261	T	5	83	6.0241	A	FALSE
2899	CT12_TI3_2	1262	T	5	78	6.41026	A	FALSE
2905	CT12_TI3_1	1269	C	6	149	4.02685	A	FALSE
2907	CT12_TI3_1	1269	T	3	149	2.01342	A	FALSE
2909	CT12_TI3_2	1269	C	3	136	2.20588	A	FALSE
2911	CT12_TI3_2	1269	T	4	136	2.94118	A	FALSE
2916	CT12_TI3_1	1281	A	15	192	7.8125	T	FALSE
2920	CT12_TI3_2	1281	A	7	118	5.9322	T	FALSE
2932	CT12_TI3_2	1282	A	10	116	8.62069	T	FALSE
2936	CT12_TI3_3	1282	A	9	190	4.73684	T	FALSE
2938	CT12_TI3_3	1282	G	2	190	1.05263	T	FALSE
2940	CT12_TI3_1	1283	A	23	185	12.4324	C	FALSE
2944	CT12_TI3_2	1283	A	17	116	14.6552	C	FALSE
2948	CT12_TI3_3	1283	A	20	190	10.5263	C	FALSE
2952	CT12_TI3_1	1284	A	13	184	7.06522	T	FALSE
2954	CT12_TI3_1	1284	G	1	184	0.543478	T	FALSE
2956	CT12_TI3_2	1284	A	14	116	12.069	T	FALSE
2958	CT12_TI3_2	1284	G	2	116	1.72414	T	FALSE
2960	CT12_TI3_3	1284	A	11	190	5.78947	T	FALSE
2962	CT12_TI3_3	1284	G	3	190	1.57895	T	FALSE
2964	CT12_TI3_1	1285	A	24	192	12.5	C	FALSE
2968	CT12_TI3_2	1285	A	16	115	13.913	C	FALSE
2972	CT12_TI3_3	1285	A	27	193	13.9896	C	FALSE
2976	CT12_TI3_1	1286	A	16	179	8.93855	C	FALSE
2980	CT12_TI3_2	1286	A	11	125	8.8	C	FALSE
2984	CT12_TI3_3	1286	A	21	191	10.9948	C	FALSE
2994	CT12_TI3_2	1304	G	8	117	6.83761	A	FALSE
3003	CT12_TI3_1	1337	T	111	235	47.234	C	FALSE
3007	CT12_TI3_2	1337	T	81	252	32.1429	C	FALSE
3011	CT12_TI3_3	1337	T	179	362	49.4475	C	FALSE
3013	CT12_TI3_1	1338	C	94	222	42.3423	T	FALSE
3017	CT12_TI3_2	1338	C	68	236	28.8136	T	FALSE
3021	CT12_TI3_3	1338	C	150	333	45.045	T	FALSE
3022	CT12_TI3_3	1338	G	1	333	0.3003	T	FALSE
3024	CT12_TI3_1	1339	A	83	210	39.5238	G	FALSE
3025	CT12_TI3_1	1339	C	2	210	0.952381	G	FALSE
3028	CT12_TI3_2	1339	A	65	246	26.4228	G	FALSE
3032	CT12_TI3_3	1339	A	143	332	43.0723	G	FALSE
3039	CT12_TI3_1	1340	T	72	189	38.0952	C	FALSE
3043	CT12_TI3_2	1340	T	56	231	24.2424	C	FALSE
3047	CT12_TI3_3	1340	T	128	305	41.9672	C	FALSE
3049	CT12_TI3_1	1341	C	19	132	14.3939	T	FALSE
3052	CT12_TI3_2	1341	A	1	136	0.735294	T	FALSE
3053	CT12_TI3_2	1341	C	10	136	7.35294	T	FALSE
3056	CT12_TI3_3	1341	A	1	184	0.543478	T	FALSE
3057	CT12_TI3_3	1341	C	12	184	6.52174	T	FALSE
3061	CT12_TI3_1	1342	C	24	154	15.5844	T	FALSE
3064	CT12_TI3_2	1342	A	1	137	0.729927	T	FALSE
3065	CT12_TI3_2	1342	C	16	137	11.6788	T	FALSE
3069	CT12_TI3_3	1342	C	14	196	7.14286	T	FALSE
3073	CT12_TI3_1	1343	C	25	150	16.6667	G	FALSE
3075	CT12_TI3_1	1343	T	1	150	0.666667	G	FALSE
3077	CT12_TI3_2	1343	C	20	146	13.6986	G	FALSE
3081	CT12_TI3_3	1343	C	16	184	8.69565	G	FALSE
3085	CT12_TI3_1	1344	C	1	151	0.662252	A	FALSE
3086	CT12_TI3_1	1344	G	32	151	21.1921	A	FALSE
3090	CT12_TI3_2	1344	G	25	150	16.6667	A	FALSE
3094	CT12_TI3_3	1344	G	20	181	11.0497	A	FALSE
3098	CT12_TI3_1	1345	G	52	166	31.3253	A	FALSE
3102	CT12_TI3_2	1345	G	38	165	23.0303	A	FALSE
3105	CT12_TI3_3	1345	C	1	211	0.473934	A	FALSE
3106	CT12_TI3_3	1345	G	30	211	14.218	A	FALSE
3110	CT12_TI3_1	1346	G	56	161	34.7826	A	FALSE
3114	CT12_TI3_2	1346	G	38	159	23.8994	A	FALSE
3118	CT12_TI3_3	1346	G	31	183	16.9399	A	FALSE
3120	CT12_TI3_1	1347	A	56	157	35.6688	G	FALSE
3124	CT12_TI3_2	1347	A	38	157	24.2038	G	FALSE
3128	CT12_TI3_3	1347	A	31	176	17.6136	G	FALSE
3134	CT12_TI3_1	1348	G	56	153	36.6013	A	FALSE
3138	CT12_TI3_2	1348	G	38	155	24.5161	A	FALSE
3142	CT12_TI3_3	1348	G	31	175	17.7143	A	FALSE
3146	CT12_TI3_1	1349	G	62	157	39.4904	A	FALSE
3150	CT12_TI3_2	1349	G	38	156	24.359	A	FALSE
3154	CT12_TI3_3	1349	G	34	175	19.4286	A	FALSE
3155	CT12_TI3_3	1349	T	1	175	0.571429	A	FALSE
3158	CT12_TI3_1	1350	G	71	166	42.7711	A	FALSE
3162	CT12_TI3_2	1350	G	45	166	27.1084	A	FALSE
3166	CT12_TI3_3	1350	G	36	170	21.1765	A	FALSE
3168	CT12_TI3_1	1351	A	74	173	42.7746	G	FALSE
3172	CT12_TI3_2	1351	A	50	154	32.4675	G	FALSE
3173	CT12_TI3_2	1351	C	1	154	0.649351	G	FALSE
3176	CT12_TI3_3	1351	A	42	176	23.8636	G	FALSE
3177	CT12_TI3_3	1351	C	1	176	0.568182	G	FALSE
3179	CT12_TI3_3	1351	T	1	176	0.568182	G	FALSE
3180	CT12_TI3_1	1352	A	73	173	42.1965	G	FALSE
3183	CT12_TI3_1	1352	T	2	173	1.15607	G	FALSE
3184	CT12_TI3_2	1352	A	49	154	31.8182	G	FALSE
3188	CT12_TI3_3	1352	A	42	176	23.8636	G	FALSE
3194	CT12_TI3_1	1353	G	74	172	43.0233	A	FALSE
3198	CT12_TI3_2	1353	G	50	154	32.4675	A	FALSE
3202	CT12_TI3_3	1353	G	42	176	23.8636	A	FALSE
3204	CT12_TI3_1	1354	A	81	185	43.7838	G	FALSE
3208	CT12_TI3_2	1354	A	58	178	32.5843	G	FALSE
3212	CT12_TI3_3	1354	A	44	183	24.0437	G	FALSE
3219	CT12_TI3_1	1355	T	77	182	42.3077	C	FALSE
3223	CT12_TI3_2	1355	T	59	172	34.3023	C	FALSE
3226	CT12_TI3_3	1355	G	5	194	2.57732	C	FALSE
3227	CT12_TI3_3	1355	T	43	194	22.1649	C	FALSE
3230	CT12_TI3_1	1356	G	79	182	43.4066	A	FALSE
3234	CT12_TI3_2	1356	G	59	172	34.3023	A	FALSE
3238	CT12_TI3_3	1356	G	43	194	22.1649	A	FALSE
3243	CT12_TI3_1	1430	T	38	168	22.619	A	FALSE
3247	CT12_TI3_2	1430	T	23	110	20.9091	A	FALSE
3249	CT12_TI3_3	1430	C	1	215	0.465116	A	FALSE
3251	CT12_TI3_3	1430	T	54	215	25.1163	A	FALSE
3254	CT12_TI3_1	1431	G	35	166	21.0843	T	FALSE
3256	CT12_TI3_2	1431	A	1	110	0.909091	T	FALSE
3258	CT12_TI3_2	1431	G	19	110	17.2727	T	FALSE
3262	CT12_TI3_3	1431	G	54	235	22.9787	T	FALSE
3264	CT12_TI3_1	1432	A	32	161	19.8758	C	FALSE
3268	CT12_TI3_2	1432	A	18	116	15.5172	C	FALSE
3272	CT12_TI3_3	1432	A	54	232	23.2759	C	FALSE
3274	CT12_TI3_3	1432	G	2	232	0.862069	C	FALSE
3275	CT12_TI3_3	1432	T	3	232	1.2931	C	FALSE
3276	CT12_TI3_1	1433	A	2	149	1.34228	G	FALSE
3277	CT12_TI3_1	1433	C	2	149	1.34228	G	FALSE
3279	CT12_TI3_1	1433	T	22	149	14.7651	G	FALSE
3283	CT12_TI3_2	1433	T	13	110	11.8182	G	FALSE
3287	CT12_TI3_3	1433	T	38	202	18.8119	G	FALSE
3292	CT12_TI3_2	1434	A	1	109	0.917431	T	FALSE
3293	CT12_TI3_2	1434	C	1	109	0.917431	T	FALSE
3294	CT12_TI3_2	1434	G	7	109	6.42202	T	FALSE
3296	CT12_TI3_3	1434	A	2	204	0.980392	T	FALSE
3297	CT12_TI3_3	1434	C	11	204	5.39216	T	FALSE
3306	CT12_TI3_2	1435	G	7	109	6.42202	C	FALSE
3316	CT12_TI3_2	1436	A	1	108	0.925926	T	FALSE
3318	CT12_TI3_2	1436	G	7	108	6.48148	T	FALSE
3331	CT12_TI3_2	1437	T	7	101	6.93069	G	FALSE
3340	CT12_TI3_2	1438	A	7	101	6.93069	T	FALSE
3342	CT12_TI3_2	1438	G	1	101	0.990099	T	FALSE
3353	CT12_TI3_2	1439	C	4	87	4.5977	A	FALSE
3355	CT12_TI3_2	1439	T	3	87	3.44828	A	FALSE
3361	CT12_TI3_1	1440	C	2	126	1.5873	A	FALSE
3362	CT12_TI3_1	1440	G	1	126	0.793651	A	FALSE
3363	CT12_TI3_1	1440	T	7	126	5.55556	A	FALSE
3365	CT12_TI3_2	1440	C	3	87	3.44828	A	FALSE
3366	CT12_TI3_2	1440	G	4	87	4.5977	A	FALSE
3367	CT12_TI3_2	1440	T	4	87	4.5977	A	FALSE
3377	CT12_TI3_2	1441	C	1	87	1.14943	A	FALSE
3378	CT12_TI3_2	1441	G	2	87	2.29885	A	FALSE
3379	CT12_TI3_2	1441	T	5	87	5.74713	A	FALSE
3388	CT12_TI3_2	1442	A	3	93	3.22581	G	FALSE
3389	CT12_TI3_2	1442	C	1	93	1.07527	G	FALSE
3391	CT12_TI3_2	1442	T	1	93	1.07527	G	FALSE
3400	CT12_TI3_2	1484	A	6	110	5.45455	T	FALSE
3412	CT12_TI3_2	1485	A	1	116	0.862069	C	FALSE
3414	CT12_TI3_2	1485	G	6	116	5.17241	C	FALSE
3420	CT12_TI3_1	1508	A	11	154	7.14286	T	FALSE
3424	CT12_TI3_2	1508	A	8	155	5.16129	T	FALSE
3428	CT12_TI3_3	1508	A	11	161	6.8323	T	FALSE
3432	CT12_TI3_1	1509	A	1	155	0.645161	G	FALSE
3435	CT12_TI3_1	1509	T	7	155	4.51613	G	FALSE
3439	CT12_TI3_2	1509	T	9	158	5.6962	G	FALSE
3444	CT12_TI3_1	1510	A	8	147	5.44218	T	FALSE
3448	CT12_TI3_2	1510	A	8	138	5.7971	T	FALSE
3452	CT12_TI3_3	1510	A	7	150	4.66667	T	FALSE
3453	CT12_TI3_3	1510	C	1	150	0.666667	T	FALSE
3454	CT12_TI3_3	1510	G	2	150	1.33333	T	FALSE
3456	CT12_TI3_1	1511	A	11	151	7.28477	C	FALSE
3460	CT12_TI3_2	1511	A	11	137	8.0292	C	FALSE
3464	CT12_TI3_3	1511	A	8	155	5.16129	C	FALSE
3466	CT12_TI3_3	1511	G	1	155	0.645161	C	FALSE
3472	CT12_TI3_2	1512	A	7	129	5.42636	C	FALSE
3474	CT12_TI3_2	1512	G	1	129	0.775194	C	FALSE
3482	CT12_TI3_1	1513	G	9	130	6.92308	T	FALSE
3484	CT12_TI3_2	1513	A	1	118	0.847458	T	FALSE
3486	CT12_TI3_2	1513	G	8	118	6.77966	T	FALSE
3490	CT12_TI3_3	1513	G	8	144	5.55556	T	FALSE
3498	CT12_TI3_2	1514	G	6	111	5.40541	T	FALSE
3508	CT12_TI3_2	1517	A	14	218	6.42202	C	FALSE
3511	CT12_TI3_2	1517	T	2	218	0.917431	C	FALSE
3520	CT12_TI3_2	1518	A	7	172	4.06977	T	FALSE
3522	CT12_TI3_2	1518	G	5	172	2.90698	T	FALSE
3532	CT12_TI3_2	1519	A	2	163	1.22699	C	FALSE
3534	CT12_TI3_2	1519	G	5	163	3.06748	C	FALSE
3535	CT12_TI3_2	1519	T	2	163	1.22699	C	FALSE
3544	CT12_TI3_2	1520	A	9	155	5.80645	T	FALSE
3545	CT12_TI3_2	1520	C	1	155	0.645161	T	FALSE
3546	CT12_TI3_2	1520	G	1	155	0.645161	T	FALSE
3556	CT12_TI3_2	1521	A	1	150	0.666667	G	FALSE
3557	CT12_TI3_2	1521	C	3	150	2	G	FALSE
3559	CT12_TI3_2	1521	T	7	150	4.66667	G	FALSE
3568	CT12_TI3_2	1522	A	5	150	3.33333	T	FALSE
3569	CT12_TI3_2	1522	C	2	150	1.33333	T	FALSE
3570	CT12_TI3_2	1522	G	1	150	0.666667	T	FALSE
3580	CT12_TI3_2	1523	A	7	149	4.69799	C	FALSE
3582	CT12_TI3_2	1523	G	3	149	2.01342	C	FALSE
3592	CT12_TI3_2	1524	A	2	149	1.34228	T	FALSE
3593	CT12_TI3_2	1524	C	5	149	3.3557	T	FALSE
3594	CT12_TI3_2	1524	G	1	149	0.671141	T	FALSE
3604	CT12_TI3_2	1525	A	5	188	2.65957	T	FALSE
3605	CT12_TI3_2	1525	C	2	188	1.06383	T	FALSE
3606	CT12_TI3_2	1525	G	3	188	1.59574	T	FALSE
3616	CT12_TI3_2	1526	A	6	199	3.01508	T	FALSE
3617	CT12_TI3_2	1526	C	9	199	4.52261	T	FALSE
3618	CT12_TI3_2	1526	G	1	199	0.502513	T	FALSE
3628	CT12_TI3_2	1527	A	2	199	1.00503	C	FALSE
3630	CT12_TI3_2	1527	G	1	199	0.502513	C	FALSE
3631	CT12_TI3_2	1527	T	12	199	6.03015	C	FALSE
3637	CT12_TI3_1	1576	C	2	223	0.896861	T	FALSE
3638	CT12_TI3_1	1576	G	12	223	5.38117	T	FALSE
3640	CT12_TI3_2	1576	A	1	213	0.469484	T	FALSE
3641	CT12_TI3_2	1576	C	2	213	0.938967	T	FALSE
3642	CT12_TI3_2	1576	G	8	213	3.75587	T	FALSE
3648	CT12_TI3_1	1577	A	13	181	7.18232	C	FALSE
3650	CT12_TI3_1	1577	G	2	181	1.10497	C	FALSE
3652	CT12_TI3_2	1577	A	9	152	5.92105	C	FALSE
3654	CT12_TI3_2	1577	G	3	152	1.97368	C	FALSE
3655	CT12_TI3_2	1577	T	2	152	1.31579	C	FALSE
3656	CT12_TI3_3	1577	A	21	227	9.2511	C	FALSE
3658	CT12_TI3_3	1577	G	2	227	0.881057	C	FALSE
3659	CT12_TI3_3	1577	T	1	227	0.440529	C	FALSE
3660	CT12_TI3_1	1578	A	2	184	1.08696	T	FALSE
3661	CT12_TI3_1	1578	C	1	184	0.543478	T	FALSE
3662	CT12_TI3_1	1578	G	9	184	4.8913	T	FALSE
3664	CT12_TI3_2	1578	A	2	165	1.21212	T	FALSE
3666	CT12_TI3_2	1578	G	7	165	4.24242	T	FALSE
3673	CT12_TI3_1	1579	C	2	186	1.07527	A	FALSE
3674	CT12_TI3_1	1579	G	7	186	3.76344	A	FALSE
3675	CT12_TI3_1	1579	T	5	186	2.68817	A	FALSE
3677	CT12_TI3_2	1579	C	5	175	2.85714	A	FALSE
3678	CT12_TI3_2	1579	G	2	175	1.14286	A	FALSE
3679	CT12_TI3_2	1579	T	2	175	1.14286	A	FALSE
3682	CT12_TI3_3	1579	G	15	241	6.22407	A	FALSE
3683	CT12_TI3_3	1579	T	3	241	1.24481	A	FALSE
3684	CT12_TI3_1	1580	A	12	192	6.25	C	FALSE
3686	CT12_TI3_1	1580	G	12	192	6.25	C	FALSE
3688	CT12_TI3_2	1580	A	13	184	7.06522	C	FALSE
3690	CT12_TI3_2	1580	G	7	184	3.80435	C	FALSE
3691	CT12_TI3_2	1580	T	2	184	1.08696	C	FALSE
3692	CT12_TI3_3	1580	A	16	256	6.25	C	FALSE
3694	CT12_TI3_3	1580	G	5	256	1.95312	C	FALSE
3696	CT12_TI3_1	1581	A	14	206	6.79612	C	FALSE
3698	CT12_TI3_1	1581	G	3	206	1.45631	C	FALSE
3700	CT12_TI3_2	1581	A	12	201	5.97015	C	FALSE
3702	CT12_TI3_2	1581	G	1	201	0.497512	C	FALSE
3704	CT12_TI3_3	1581	A	14	282	4.96454	C	FALSE
3706	CT12_TI3_3	1581	G	3	282	1.06383	C	FALSE
3707	CT12_TI3_3	1581	T	2	282	0.70922	C	FALSE
3712	CT12_TI3_2	1582	A	4	188	2.12766	T	FALSE
3714	CT12_TI3_2	1582	G	7	188	3.7234	T	FALSE
3720	CT12_TI3_1	1583	A	10	191	5.2356	C	FALSE
3722	CT12_TI3_1	1583	G	1	191	0.52356	C	FALSE
3724	CT12_TI3_2	1583	A	15	186	8.06452	C	FALSE
3728	CT12_TI3_3	1583	A	14	265	5.28302	C	FALSE
3732	CT12_TI3_1	1584	A	16	190	8.42105	C	FALSE
3734	CT12_TI3_1	1584	G	1	190	0.526316	C	FALSE
3736	CT12_TI3_2	1584	A	10	182	5.49451	C	FALSE
3740	CT12_TI3_3	1584	A	20	292	6.84932	C	FALSE
3742	CT12_TI3_3	1584	G	1	292	0.342466	C	FALSE
3744	CT12_TI3_1	1585	A	11	189	5.82011	C	FALSE
3746	CT12_TI3_1	1585	G	2	189	1.0582	C	FALSE
3748	CT12_TI3_2	1585	A	11	185	5.94595	C	FALSE
3750	CT12_TI3_2	1585	G	1	185	0.540541	C	FALSE
3756	CT12_TI3_1	1586	A	126	128	98.4375	C	FALSE
3759	CT12_TI3_1	1586	T	1	128	0.78125	C	FALSE
3760	CT12_TI3_2	1586	A	101	102	99.0196	C	FALSE
3764	CT12_TI3_3	1586	A	194	196	98.9796	C	FALSE
3766	CT12_TI3_3	1586	G	2	196	1.02041	C	FALSE
3775	CT12_TI3_2	1587	T	6	116	5.17241	G	FALSE
3782	CT12_TI3_1	1588	G	1	200	0.5	C	FALSE
3783	CT12_TI3_1	1588	T	11	200	5.5	C	FALSE
3787	CT12_TI3_2	1588	T	7	118	5.9322	C	FALSE
3788	CT12_TI3_3	1588	A	1	206	0.485437	C	FALSE
3790	CT12_TI3_3	1588	G	5	206	2.42718	C	FALSE
3791	CT12_TI3_3	1588	T	19	206	9.2233	C	FALSE
3795	CT12_TI3_1	1589	T	12	198	6.06061	A	FALSE
3799	CT12_TI3_2	1589	T	7	119	5.88235	A	FALSE
3802	CT12_TI3_3	1589	G	1	206	0.485437	A	FALSE
3803	CT12_TI3_3	1589	T	24	206	11.6505	A	FALSE
3805	CT12_TI3_1	1590	C	12	202	5.94059	T	FALSE
3809	CT12_TI3_2	1590	C	9	123	7.31707	T	FALSE
3813	CT12_TI3_3	1590	C	36	216	16.6667	T	FALSE
3819	CT12_TI3_1	1591	T	13	203	6.40394	A	FALSE
3823	CT12_TI3_2	1591	T	10	122	8.19672	A	FALSE
3827	CT12_TI3_3	1591	T	30	205	14.6341	A	FALSE
3829	CT12_TI3_1	1592	C	19	216	8.7963	G	FALSE
3833	CT12_TI3_2	1592	C	13	134	9.70149	G	FALSE
3837	CT12_TI3_3	1592	C	34	235	14.4681	G	FALSE
3843	CT12_TI3_1	1593	T	21	215	9.76744	C	FALSE
3847	CT12_TI3_2	1593	T	13	134	9.70149	C	FALSE
3851	CT12_TI3_3	1593	T	34	242	14.0496	C	FALSE
3853	CT12_TI3_1	1594	C	1	217	0.460829	A	FALSE
3854	CT12_TI3_1	1594	G	21	217	9.67742	A	FALSE
3855	CT12_TI3_1	1594	T	2	217	0.921659	A	FALSE
3858	CT12_TI3_2	1594	G	13	134	9.70149	A	FALSE
3862	CT12_TI3_3	1594	G	34	242	14.0496	A	FALSE
3864	CT12_TI3_1	1595	A	22	219	10.0457	G	FALSE
3868	CT12_TI3_2	1595	A	13	128	10.1562	G	FALSE
3872	CT12_TI3_3	1595	A	40	244	16.3934	G	FALSE
3878	CT12_TI3_1	1596	G	22	223	9.86547	T	FALSE
3882	CT12_TI3_2	1596	G	15	121	12.3967	T	FALSE
3884	CT12_TI3_3	1596	A	1	242	0.413223	T	FALSE
3886	CT12_TI3_3	1596	G	39	242	16.1157	T	FALSE
3892	CT12_TI3_2	1600	A	7	150	4.66667	C	FALSE
3895	CT12_TI3_2	1600	T	1	150	0.666667	C	FALSE
3905	CT12_TI3_2	1601	C	8	148	5.40541	T	FALSE
3916	CT12_TI3_2	1602	A	11	163	6.74847	T	FALSE
3931	CT12_TI3_2	1603	T	12	163	7.36196	A	FALSE
3941	CT12_TI3_2	1604	C	11	162	6.79012	T	FALSE
3952	CT12_TI3_2	1605	A	11	158	6.96203	T	FALSE
3966	CT12_TI3_2	1606	G	1	157	0.636943	A	FALSE
3967	CT12_TI3_2	1606	T	11	157	7.00637	A	FALSE
3973	CT12_TI3_1	1607	C	10	217	4.60829	G	FALSE
3975	CT12_TI3_1	1607	T	17	217	7.8341	G	FALSE
3977	CT12_TI3_2	1607	C	5	184	2.71739	G	FALSE
3979	CT12_TI3_2	1607	T	11	184	5.97826	G	FALSE
3981	CT12_TI3_3	1607	C	27	275	9.81818	G	FALSE
3983	CT12_TI3_3	1607	T	15	275	5.45455	G	FALSE
3985	CT12_TI3_1	1608	C	33	217	15.2074	A	FALSE
3989	CT12_TI3_2	1608	C	16	187	8.55615	A	FALSE
3993	CT12_TI3_3	1608	C	39	275	14.1818	A	FALSE
3995	CT12_TI3_3	1608	T	1	275	0.363636	A	FALSE
3996	CT12_TI3_1	1609	A	1	217	0.460829	T	FALSE
3997	CT12_TI3_1	1609	C	33	217	15.2074	T	FALSE
3998	CT12_TI3_1	1609	G	2	217	0.921659	T	FALSE
4001	CT12_TI3_2	1609	C	18	184	9.78261	T	FALSE
4002	CT12_TI3_2	1609	G	3	184	1.63043	T	FALSE
4005	CT12_TI3_3	1609	C	39	272	14.3382	T	FALSE
4006	CT12_TI3_3	1609	G	3	272	1.10294	T	FALSE
4009	CT12_TI3_1	1610	C	1	252	0.396825	A	FALSE
4010	CT12_TI3_1	1610	G	65	252	25.7937	A	FALSE
4013	CT12_TI3_2	1610	C	1	210	0.47619	A	FALSE
4014	CT12_TI3_2	1610	G	38	210	18.0952	A	FALSE
4018	CT12_TI3_3	1610	G	84	314	26.7516	A	FALSE
4022	CT12_TI3_1	1611	G	36	84	42.8571	T	FALSE
4026	CT12_TI3_2	1611	G	23	58	39.6552	T	FALSE
4029	CT12_TI3_3	1611	C	1	76	1.31579	T	FALSE
4030	CT12_TI3_3	1611	G	42	76	55.2632	T	FALSE
4032	CT12_TI3_1	1612	A	5	75	6.66667	T	FALSE
4033	CT12_TI3_1	1612	C	6	75	8	T	FALSE
4034	CT12_TI3_1	1612	G	24	75	32	T	FALSE
4036	CT12_TI3_2	1612	A	10	57	17.5439	T	FALSE
4037	CT12_TI3_2	1612	C	5	57	8.77193	T	FALSE
4038	CT12_TI3_2	1612	G	18	57	31.5789	T	FALSE
4040	CT12_TI3_3	1612	A	1	75	1.33333	T	FALSE
4041	CT12_TI3_3	1612	C	5	75	6.66667	T	FALSE
4042	CT12_TI3_3	1612	G	34	75	45.3333	T	FALSE
4046	CT12_TI3_1	1616	G	217	280	77.5	A	FALSE
4049	CT12_TI3_2	1616	C	1	203	0.492611	A	FALSE
4050	CT12_TI3_2	1616	G	154	203	75.8621	A	FALSE
4051	CT12_TI3_2	1616	T	1	203	0.492611	A	FALSE
4054	CT12_TI3_3	1616	G	213	281	75.8007	A	FALSE
4055	CT12_TI3_3	1616	T	1	281	0.355872	A	FALSE
4056	CT12_TI3_1	1625	A	3	287	1.0453	T	FALSE
4057	CT12_TI3_1	1625	C	115	287	40.0697	T	FALSE
4061	CT12_TI3_2	1625	C	93	234	39.7436	T	FALSE
4064	CT12_TI3_3	1625	A	4	383	1.04439	T	FALSE
4065	CT12_TI3_3	1625	C	135	383	35.248	T	FALSE
4069	CT12_TI3_1	1626	C	1	293	0.341297	A	FALSE
4070	CT12_TI3_1	1626	G	23	293	7.84983	A	FALSE
4074	CT12_TI3_2	1626	G	29	239	12.1339	A	FALSE
4075	CT12_TI3_2	1626	T	2	239	0.83682	A	FALSE
4078	CT12_TI3_3	1626	G	33	411	8.0292	A	FALSE
4081	CT12_TI3_1	1627	C	23	294	7.82313	A	FALSE
4083	CT12_TI3_1	1627	T	4	294	1.36054	A	FALSE
4085	CT12_TI3_2	1627	C	15	236	6.35593	A	FALSE
4089	CT12_TI3_3	1627	C	27	408	6.61765	A	FALSE
4091	CT12_TI3_3	1627	T	1	408	0.245098	A	FALSE
4094	CT12_TI3_1	1628	G	28	298	9.39597	T	FALSE
4098	CT12_TI3_2	1628	G	15	236	6.35593	T	FALSE
4102	CT12_TI3_3	1628	G	28	410	6.82927	T	FALSE
4105	CT12_TI3_1	1629	C	2	298	0.671141	A	FALSE
4106	CT12_TI3_1	1629	G	123	298	41.2752	A	FALSE
4110	CT12_TI3_2	1629	G	94	235	40	A	FALSE
4114	CT12_TI3_3	1629	G	161	408	39.4608	A	FALSE
4116	CT12_TI3_1	1630	A	85	286	29.7203	T	FALSE
4118	CT12_TI3_1	1630	G	5	286	1.74825	T	FALSE
4120	CT12_TI3_2	1630	A	79	233	33.9056	T	FALSE
4124	CT12_TI3_3	1630	A	132	399	33.0827	T	FALSE
4126	CT12_TI3_3	1630	G	1	399	0.250627	T	FALSE
4128	CT12_TI3_1	1631	A	43	286	15.035	C	FALSE
4130	CT12_TI3_1	1631	G	39	286	13.6364	C	FALSE
4131	CT12_TI3_1	1631	T	23	286	8.04196	C	FALSE
4132	CT12_TI3_2	1631	A	40	227	17.6211	C	FALSE
4134	CT12_TI3_2	1631	G	27	227	11.8943	C	FALSE
4135	CT12_TI3_2	1631	T	15	227	6.60793	C	FALSE
4136	CT12_TI3_3	1631	A	63	394	15.9898	C	FALSE
4138	CT12_TI3_3	1631	G	39	394	9.89848	C	FALSE
4139	CT12_TI3_3	1631	T	26	394	6.59898	C	FALSE
4140	CT12_TI3_1	1632	A	34	243	13.9918	G	FALSE
4143	CT12_TI3_1	1632	T	3	243	1.23457	G	FALSE
4144	CT12_TI3_2	1632	A	31	191	16.2304	G	FALSE
4147	CT12_TI3_2	1632	T	13	191	6.80628	G	FALSE
4148	CT12_TI3_3	1632	A	27	362	7.45856	G	FALSE
4151	CT12_TI3_3	1632	T	28	362	7.73481	G	FALSE
4152	CT12_TI3_1	1633	A	49	246	19.9187	G	FALSE
4156	CT12_TI3_2	1633	A	38	194	19.5876	G	FALSE
4159	CT12_TI3_2	1633	T	5	194	2.57732	G	FALSE
4160	CT12_TI3_3	1633	A	52	366	14.2077	G	FALSE
4164	CT12_TI3_1	1634	A	14	207	6.76329	C	FALSE
4166	CT12_TI3_1	1634	G	28	207	13.5266	C	FALSE
4167	CT12_TI3_1	1634	T	6	207	2.89855	C	FALSE
4168	CT12_TI3_2	1634	A	9	166	5.42169	C	FALSE
4170	CT12_TI3_2	1634	G	31	166	18.6747	C	FALSE
4171	CT12_TI3_2	1634	T	3	166	1.80723	C	FALSE
4172	CT12_TI3_3	1634	A	42	340	12.3529	C	FALSE
4174	CT12_TI3_3	1634	G	28	340	8.23529	C	FALSE
4175	CT12_TI3_3	1634	T	17	340	5	C	FALSE
4176	CT12_TI3_1	1635	A	24	197	12.1827	T	FALSE
4177	CT12_TI3_1	1635	C	1	197	0.507614	T	FALSE
4180	CT12_TI3_2	1635	A	12	160	7.5	T	FALSE
4184	CT12_TI3_3	1635	A	36	326	11.0429	T	FALSE
4185	CT12_TI3_3	1635	C	1	326	0.306748	T	FALSE
4188	CT12_TI3_1	1636	A	14	213	6.57277	G	FALSE
4189	CT12_TI3_1	1636	C	2	213	0.938967	G	FALSE
4192	CT12_TI3_2	1636	A	10	142	7.04225	G	FALSE
4193	CT12_TI3_2	1636	C	1	142	0.704225	G	FALSE
4200	CT12_TI3_1	1637	A	5	213	2.34742	T	FALSE
4201	CT12_TI3_1	1637	C	15	213	7.04225	T	FALSE
4205	CT12_TI3_2	1637	C	10	142	7.04225	T	FALSE
4208	CT12_TI3_3	1637	A	2	340	0.588235	T	FALSE
4209	CT12_TI3_3	1637	C	17	340	5	T	FALSE
4216	CT12_TI3_2	1653	A	8	115	6.95652	C	FALSE
4228	CT12_TI3_2	1654	A	8	152	5.26316	C	FALSE
4236	CT12_TI3_1	1658	A	11	191	5.75916	G	FALSE
4240	CT12_TI3_2	1658	A	6	108	5.55556	G	FALSE
4244	CT12_TI3_3	1658	A	18	237	7.59494	G	FALSE
4245	CT12_TI3_3	1658	C	9	237	3.79747	G	FALSE
4251	CT12_TI3_1	1667	T	26	170	15.2941	A	FALSE
4255	CT12_TI3_2	1667	T	15	119	12.605	A	FALSE
4257	CT12_TI3_3	1667	C	1	182	0.549451	A	FALSE
4259	CT12_TI3_3	1667	T	27	182	14.8352	A	FALSE
4261	CT12_TI3_1	1668	C	22	163	13.4969	A	FALSE
4265	CT12_TI3_2	1668	C	13	110	11.8182	A	FALSE
4269	CT12_TI3_3	1668	C	25	169	14.7929	A	FALSE
4272	CT12_TI3_1	1669	A	23	149	15.4362	G	FALSE
4276	CT12_TI3_2	1669	A	11	115	9.56522	G	FALSE
4277	CT12_TI3_2	1669	C	1	115	0.869565	G	FALSE
4280	CT12_TI3_3	1669	A	25	163	15.3374	G	FALSE
4284	CT12_TI3_1	1670	A	4	153	2.61438	T	FALSE
4285	CT12_TI3_1	1670	C	1	153	0.653595	T	FALSE
4286	CT12_TI3_1	1670	G	11	153	7.18954	T	FALSE
4288	CT12_TI3_2	1670	A	6	114	5.26316	T	FALSE
4289	CT12_TI3_2	1670	C	1	114	0.877193	T	FALSE
4290	CT12_TI3_2	1670	G	2	114	1.75439	T	FALSE
4292	CT12_TI3_3	1670	A	5	159	3.14465	T	FALSE
4293	CT12_TI3_3	1670	C	1	159	0.628931	T	FALSE
4294	CT12_TI3_3	1670	G	10	159	6.28931	T	FALSE
4296	CT12_TI3_1	1671	A	4	152	2.63158	T	FALSE
4298	CT12_TI3_1	1671	G	11	152	7.23684	T	FALSE
4300	CT12_TI3_2	1671	A	6	111	5.40541	T	FALSE
4302	CT12_TI3_2	1671	G	2	111	1.8018	T	FALSE
4304	CT12_TI3_3	1671	A	5	155	3.22581	T	FALSE
4306	CT12_TI3_3	1671	G	11	155	7.09677	T	FALSE
4312	CT12_TI3_2	1672	A	1	109	0.917431	T	FALSE
4314	CT12_TI3_2	1672	G	7	109	6.42202	T	FALSE
4324	CT12_TI3_2	1673	A	6	109	5.50459	T	FALSE
4326	CT12_TI3_2	1673	G	1	109	0.917431	T	FALSE
4336	CT12_TI3_2	1674	A	6	109	5.50459	C	FALSE
4351	CT12_TI3_2	1677	T	8	136	5.88235	A	FALSE
4361	CT12_TI3_2	1678	C	8	136	5.88235	T	FALSE
4373	CT12_TI3_2	1689	C	3	121	2.47934	G	FALSE
4375	CT12_TI3_2	1689	T	4	121	3.30579	G	FALSE
4384	CT12_TI3_2	1690	A	4	89	4.49438	T	FALSE
4386	CT12_TI3_2	1690	G	1	89	1.1236	T	FALSE
4392	CT12_TI3_1	1705	A	10	122	8.19672	T	FALSE
4394	CT12_TI3_1	1705	G	4	122	3.27869	T	FALSE
4396	CT12_TI3_2	1705	A	7	89	7.86517	T	FALSE
4397	CT12_TI3_2	1705	C	1	89	1.1236	T	FALSE
4400	CT12_TI3_3	1705	A	5	105	4.7619	T	FALSE
4402	CT12_TI3_3	1705	G	1	105	0.952381	T	FALSE
4411	CT12_TI3_2	1706	T	6	99	6.06061	G	FALSE
4421	CT12_TI3_2	1707	C	2	99	2.0202	A	FALSE
4422	CT12_TI3_2	1707	G	1	99	1.0101	A	FALSE
4423	CT12_TI3_2	1707	T	7	99	7.07071	A	FALSE
4428	CT12_TI3_1	1708	A	6	139	4.31655	C	FALSE
4430	CT12_TI3_1	1708	G	3	139	2.15827	C	FALSE
4432	CT12_TI3_2	1708	A	2	103	1.94175	C	FALSE
4434	CT12_TI3_2	1708	G	4	103	3.8835	C	FALSE
4435	CT12_TI3_2	1708	T	2	103	1.94175	C	FALSE
4440	CT12_TI3_1	1709	A	6	142	4.22535	C	FALSE
4443	CT12_TI3_1	1709	T	2	142	1.40845	C	FALSE
4444	CT12_TI3_2	1709	A	7	102	6.86275	C	FALSE
4446	CT12_TI3_2	1709	G	1	102	0.980392	C	FALSE
4447	CT12_TI3_2	1709	T	2	102	1.96078	C	FALSE
4448	CT12_TI3_3	1709	A	5	115	4.34783	C	FALSE
4450	CT12_TI3_3	1709	G	2	115	1.73913	C	FALSE
4456	CT12_TI3_2	1710	A	1	102	0.980392	G	FALSE
4457	CT12_TI3_2	1710	C	1	102	0.980392	G	FALSE
4459	CT12_TI3_2	1710	T	4	102	3.92157	G	FALSE
4469	CT12_TI3_2	1711	C	2	102	1.96078	G	FALSE
4471	CT12_TI3_2	1711	T	5	102	4.90196	G	FALSE
4477	CT12_TI3_1	1712	C	2	140	1.42857	A	FALSE
4479	CT12_TI3_1	1712	T	6	140	4.28571	A	FALSE
4481	CT12_TI3_2	1712	C	2	98	2.04082	A	FALSE
4483	CT12_TI3_2	1712	T	9	98	9.18367	A	FALSE
4495	CT12_TI3_2	1713	T	7	106	6.60377	G	FALSE
4507	CT12_TI3_2	1714	T	6	106	5.66038	A	FALSE
4513	CT12_TI3_1	1715	C	3	148	2.02703	G	FALSE
4515	CT12_TI3_1	1715	T	8	148	5.40541	G	FALSE
4517	CT12_TI3_2	1715	C	4	107	3.73832	G	FALSE
4519	CT12_TI3_2	1715	T	7	107	6.54206	G	FALSE
4520	CT12_TI3_3	1715	A	2	144	1.38889	G	FALSE
4521	CT12_TI3_3	1715	C	1	144	0.694444	G	FALSE
4523	CT12_TI3_3	1715	T	5	144	3.47222	G	FALSE
4524	CT12_TI3_1	1716	A	5	150	3.33333	T	FALSE
4526	CT12_TI3_1	1716	G	7	150	4.66667	T	FALSE
4528	CT12_TI3_2	1716	A	4	109	3.66972	T	FALSE
4529	CT12_TI3_2	1716	C	2	109	1.83486	T	FALSE
4536	CT12_TI3_1	1717	A	9	151	5.96026	T	FALSE
4538	CT12_TI3_1	1717	G	2	151	1.3245	T	FALSE
4540	CT12_TI3_2	1717	A	5	113	4.42478	T	FALSE
4542	CT12_TI3_2	1717	G	1	113	0.884956	T	FALSE
4552	CT12_TI3_2	1718	A	1	113	0.884956	G	FALSE
4553	CT12_TI3_2	1718	C	3	113	2.65487	G	FALSE
4555	CT12_TI3_2	1718	T	3	113	2.65487	G	FALSE
4556	CT12_TI3_3	1718	A	1	133	0.75188	G	FALSE
4557	CT12_TI3_3	1718	C	2	133	1.50376	G	FALSE
4559	CT12_TI3_3	1718	T	5	133	3.7594	G	FALSE
4564	CT12_TI3_2	1719	A	4	111	3.6036	C	FALSE
4566	CT12_TI3_2	1719	G	1	111	0.900901	C	FALSE
4567	CT12_TI3_2	1719	T	2	111	1.8018	C	FALSE
4572	CT12_TI3_1	1720	A	8	146	5.47945	T	FALSE
4574	CT12_TI3_1	1720	G	4	146	2.73973	T	FALSE
4576	CT12_TI3_2	1720	A	5	107	4.6729	T	FALSE
4577	CT12_TI3_2	1720	C	1	107	0.934579	T	FALSE
4578	CT12_TI3_2	1720	G	5	107	4.6729	T	FALSE
4580	CT12_TI3_3	1720	A	6	129	4.65116	T	FALSE
4581	CT12_TI3_3	1720	C	1	129	0.775194	T	FALSE
4582	CT12_TI3_3	1720	G	2	129	1.55039	T	FALSE
4584	CT12_TI3_1	1721	A	4	137	2.91971	T	FALSE
4585	CT12_TI3_1	1721	C	1	137	0.729927	T	FALSE
4586	CT12_TI3_1	1721	G	7	137	5.10949	T	FALSE
4588	CT12_TI3_2	1721	A	3	104	2.88462	T	FALSE
4589	CT12_TI3_2	1721	C	2	104	1.92308	T	FALSE
4590	CT12_TI3_2	1721	G	4	104	3.84615	T	FALSE
4592	CT12_TI3_3	1721	A	4	127	3.14961	T	FALSE
4594	CT12_TI3_3	1721	G	3	127	2.3622	T	FALSE
4600	CT12_TI3_2	1722	A	4	90	4.44444	T	FALSE
4602	CT12_TI3_2	1722	G	1	90	1.11111	T	FALSE
4604	CT12_TI3_3	1722	A	1	111	0.900901	T	FALSE
4606	CT12_TI3_3	1722	G	5	111	4.5045	T	FALSE
4612	CT12_TI3_2	1723	A	3	90	3.33333	C	FALSE
4614	CT12_TI3_2	1723	G	4	90	4.44444	C	FALSE
4620	CT12_TI3_1	1724	A	4	131	3.05344	T	FALSE
4621	CT12_TI3_1	1724	C	1	131	0.763359	T	FALSE
4622	CT12_TI3_1	1724	G	2	131	1.52672	T	FALSE
4624	CT12_TI3_2	1724	A	4	92	4.34783	T	FALSE
4626	CT12_TI3_2	1724	G	1	92	1.08696	T	FALSE
4632	CT12_TI3_1	1725	A	2	131	1.52672	T	FALSE
4634	CT12_TI3_1	1725	G	5	131	3.81679	T	FALSE
4636	CT12_TI3_2	1725	A	4	93	4.30108	T	FALSE
4638	CT12_TI3_2	1725	G	2	93	2.15054	T	FALSE
4645	CT12_TI3_1	1726	C	5	131	3.81679	A	FALSE
4646	CT12_TI3_1	1726	G	1	131	0.763359	A	FALSE
4647	CT12_TI3_1	1726	T	5	131	3.81679	A	FALSE
4649	CT12_TI3_2	1726	C	2	92	2.17391	A	FALSE
4651	CT12_TI3_2	1726	T	3	92	3.26087	A	FALSE
4653	CT12_TI3_3	1726	C	5	124	4.03226	A	FALSE
4655	CT12_TI3_3	1726	T	3	124	2.41935	A	FALSE
4657	CT12_TI3_1	1727	C	6	129	4.65116	A	FALSE
4659	CT12_TI3_1	1727	T	4	129	3.10078	A	FALSE
4661	CT12_TI3_2	1727	C	1	92	1.08696	A	FALSE
4663	CT12_TI3_2	1727	T	5	92	5.43478	A	FALSE
4669	CT12_TI3_1	1728	C	5	135	3.7037	A	FALSE
4670	CT12_TI3_1	1728	G	1	135	0.740741	A	FALSE
4671	CT12_TI3_1	1728	T	2	135	1.48148	A	FALSE
4673	CT12_TI3_2	1728	C	2	103	1.94175	A	FALSE
4675	CT12_TI3_2	1728	T	4	103	3.8835	A	FALSE
4677	CT12_TI3_3	1728	C	3	124	2.41935	A	FALSE
4678	CT12_TI3_3	1728	G	1	124	0.806452	A	FALSE
4679	CT12_TI3_3	1728	T	4	124	3.22581	A	FALSE
4685	CT12_TI3_2	1729	C	5	90	5.55556	A	FALSE
4692	CT12_TI3_1	1730	A	4	130	3.07692	T	FALSE
4693	CT12_TI3_1	1730	C	1	130	0.769231	T	FALSE
4694	CT12_TI3_1	1730	G	3	130	2.30769	T	FALSE
4696	CT12_TI3_2	1730	A	3	88	3.40909	T	FALSE
4697	CT12_TI3_2	1730	C	1	88	1.13636	T	FALSE
4698	CT12_TI3_2	1730	G	2	88	2.27273	T	FALSE
4708	CT12_TI3_2	1731	A	4	87	4.5977	C	FALSE
4710	CT12_TI3_2	1731	G	1	87	1.14943	C	FALSE
4716	CT12_TI3_1	1732	A	3	130	2.30769	T	FALSE
4718	CT12_TI3_1	1732	G	4	130	3.07692	T	FALSE
4720	CT12_TI3_2	1732	A	2	85	2.35294	T	FALSE
4722	CT12_TI3_2	1732	G	3	85	3.52941	T	FALSE
4728	CT12_TI3_1	1733	A	6	130	4.61538	T	FALSE
4730	CT12_TI3_1	1733	G	3	130	2.30769	T	FALSE
4732	CT12_TI3_2	1733	A	1	82	1.21951	T	FALSE
4733	CT12_TI3_2	1733	C	2	82	2.43902	T	FALSE
4734	CT12_TI3_2	1733	G	2	82	2.43902	T	FALSE
4736	CT12_TI3_3	1733	A	1	111	0.900901	T	FALSE
4737	CT12_TI3_3	1733	C	2	111	1.8018	T	FALSE
4738	CT12_TI3_3	1733	G	4	111	3.6036	T	FALSE
4744	CT12_TI3_2	1734	A	6	84	7.14286	C	FALSE
4759	CT12_TI3_2	1735	T	6	92	6.52174	G	FALSE
4768	CT12_TI3_2	1736	A	5	92	5.43478	C	FALSE
4780	CT12_TI3_2	1737	A	2	87	2.29885	T	FALSE
4782	CT12_TI3_2	1737	G	3	87	3.44828	T	FALSE
4784	CT12_TI3_3	1737	A	1	141	0.70922	T	FALSE
4786	CT12_TI3_3	1737	G	7	141	4.96454	T	FALSE
4795	CT12_TI3_2	1738	T	6	94	6.38298	G	FALSE
4807	CT12_TI3_2	1740	T	7	98	7.14286	C	FALSE
4813	CT12_TI3_1	1745	C	11	147	7.48299	T	FALSE
4817	CT12_TI3_2	1745	C	26	142	18.3099	T	FALSE
4821	CT12_TI3_3	1745	C	52	212	24.5283	T	FALSE
4822	CT12_TI3_3	1745	G	1	212	0.471698	T	FALSE
4825	CT12_TI3_1	1746	C	11	149	7.38255	T	FALSE
4829	CT12_TI3_2	1746	C	26	142	18.3099	T	FALSE
4833	CT12_TI3_3	1746	C	48	212	22.6415	T	FALSE
4839	CT12_TI3_1	1747	T	13	150	8.66667	C	FALSE
4843	CT12_TI3_2	1747	T	25	142	17.6056	C	FALSE
4847	CT12_TI3_3	1747	T	47	212	22.1698	C	FALSE
4848	CT12_TI3_1	1748	A	7	129	5.42636	C	FALSE
4852	CT12_TI3_2	1748	A	7	103	6.79612	C	FALSE
4854	CT12_TI3_2	1748	G	1	103	0.970874	C	FALSE
4856	CT12_TI3_3	1748	A	7	134	5.22388	C	FALSE
4861	CT12_TI3_1	1749	C	9	164	5.4878	A	FALSE
4865	CT12_TI3_2	1749	C	7	145	4.82759	A	FALSE
4867	CT12_TI3_2	1749	T	1	145	0.689655	A	FALSE
4873	CT12_TI3_1	1750	C	25	164	15.2439	A	FALSE
4877	CT12_TI3_2	1750	C	18	150	12	A	FALSE
4881	CT12_TI3_3	1750	C	37	216	17.1296	A	FALSE
4883	CT12_TI3_3	1750	T	2	216	0.925926	A	FALSE
4886	CT12_TI3_1	1751	G	20	164	12.1951	A	FALSE
4887	CT12_TI3_1	1751	T	13	164	7.92683	A	FALSE
4890	CT12_TI3_2	1751	G	11	150	7.33333	A	FALSE
4891	CT12_TI3_2	1751	T	26	150	17.3333	A	FALSE
4894	CT12_TI3_3	1751	G	32	213	15.0235	A	FALSE
4895	CT12_TI3_3	1751	T	47	213	22.0657	A	FALSE
4897	CT12_TI3_1	1752	C	33	159	20.7547	T	FALSE
4901	CT12_TI3_2	1752	C	37	143	25.8741	T	FALSE
4902	CT12_TI3_2	1752	G	1	143	0.699301	T	FALSE
4905	CT12_TI3_3	1752	C	79	209	37.799	T	FALSE
4909	CT12_TI3_1	1753	C	33	159	20.7547	T	FALSE
4913	CT12_TI3_2	1753	C	37	143	25.8741	T	FALSE
4917	CT12_TI3_3	1753	C	84	209	40.1914	T	FALSE
4920	CT12_TI3_1	1754	A	32	163	19.6319	T	FALSE
4921	CT12_TI3_1	1754	C	1	163	0.613497	T	FALSE
4922	CT12_TI3_1	1754	G	1	163	0.613497	T	FALSE
4924	CT12_TI3_2	1754	A	37	143	25.8741	T	FALSE
4928	CT12_TI3_3	1754	A	79	209	37.799	T	FALSE
4929	CT12_TI3_3	1754	C	5	209	2.39234	T	FALSE
4938	CT12_TI3_2	1927	G	9	125	7.2	A	FALSE
4941	CT12_TI3_3	1927	C	1	195	0.512821	A	FALSE
4942	CT12_TI3_3	1927	G	9	195	4.61538	A	FALSE
4943	CT12_TI3_3	1927	T	1	195	0.512821	A	FALSE
4949	CT12_TI3_2	1928	C	9	111	8.10811	T	FALSE
4950	CT12_TI3_2	1928	G	2	111	1.8018	T	FALSE
4962	CT12_TI3_2	1929	G	6	110	5.45455	A	FALSE
4965	CT12_TI3_3	1929	C	1	173	0.578035	A	FALSE
4966	CT12_TI3_3	1929	G	8	173	4.62428	A	FALSE
4967	CT12_TI3_3	1929	T	1	173	0.578035	A	FALSE
4974	CT12_TI3_2	1930	G	2	111	1.8018	A	FALSE
4975	CT12_TI3_2	1930	T	6	111	5.40541	A	FALSE
4984	CT12_TI3_2	1931	A	2	114	1.75439	C	FALSE
4987	CT12_TI3_2	1931	T	6	114	5.26316	C	FALSE
4998	CT12_TI3_2	1934	G	7	124	5.64516	C	FALSE
5008	CT12_TI3_2	1935	A	7	131	5.34351	C	FALSE
5016	CT12_TI3_1	1937	A	13	173	7.51445	C	FALSE
5020	CT12_TI3_2	1937	A	8	135	5.92593	C	FALSE
5032	CT12_TI3_2	1952	A	3	151	1.98675	C	FALSE
5034	CT12_TI3_2	1952	G	4	151	2.64901	C	FALSE
5035	CT12_TI3_2	1952	T	1	151	0.662252	C	FALSE
5044	CT12_TI3_2	1953	A	10	162	6.17284	C	FALSE
5055	CT12_TI3_1	1959	T	6	115	5.21739	G	FALSE
5059	CT12_TI3_2	1959	T	8	115	6.95652	G	FALSE
5064	CT12_TI3_1	1960	A	1	118	0.847458	G	FALSE
5067	CT12_TI3_1	1960	T	7	118	5.9322	G	FALSE
5069	CT12_TI3_2	1960	C	1	118	0.847458	G	FALSE
5071	CT12_TI3_2	1960	T	6	118	5.08475	G	FALSE
5073	CT12_TI3_3	1960	C	3	193	1.5544	G	FALSE
5075	CT12_TI3_3	1960	T	9	193	4.66321	G	FALSE
5080	CT12_TI3_2	1961	A	5	116	4.31034	T	FALSE
5081	CT12_TI3_2	1961	C	1	116	0.862069	T	FALSE
5091	CT12_TI3_1	1962	T	8	115	6.95652	G	FALSE
5095	CT12_TI3_2	1962	T	9	101	8.91089	G	FALSE
5099	CT12_TI3_3	1962	T	21	180	11.6667	G	FALSE
5103	CT12_TI3_1	1963	T	12	115	10.4348	G	FALSE
5107	CT12_TI3_2	1963	T	15	104	14.4231	G	FALSE
5108	CT12_TI3_3	1963	A	6	181	3.31492	G	FALSE
5109	CT12_TI3_3	1963	C	1	181	0.552486	G	FALSE
5111	CT12_TI3_3	1963	T	20	181	11.0497	G	FALSE
5116	CT12_TI3_2	1964	A	7	104	6.73077	T	FALSE
5125	CT12_TI3_1	1965	C	1	116	0.862069	A	FALSE
5127	CT12_TI3_1	1965	T	10	116	8.62069	A	FALSE
5131	CT12_TI3_2	1965	T	15	104	14.4231	A	FALSE
5135	CT12_TI3_3	1965	T	15	176	8.52273	A	FALSE
5136	CT12_TI3_1	1966	A	2	115	1.73913	G	FALSE
5137	CT12_TI3_1	1966	C	1	115	0.869565	G	FALSE
5139	CT12_TI3_1	1966	T	4	115	3.47826	G	FALSE
5141	CT12_TI3_2	1966	C	3	106	2.83019	G	FALSE
5143	CT12_TI3_2	1966	T	4	106	3.77358	G	FALSE
5145	CT12_TI3_3	1966	C	5	182	2.74725	G	FALSE
5147	CT12_TI3_3	1966	T	11	182	6.04396	G	FALSE
5148	CT12_TI3_1	1967	A	12	114	10.5263	C	FALSE
5151	CT12_TI3_1	1967	T	1	114	0.877193	C	FALSE
5152	CT12_TI3_2	1967	A	15	106	14.1509	C	FALSE
5156	CT12_TI3_3	1967	A	25	182	13.7363	C	FALSE
5162	CT12_TI3_1	1968	G	1	115	0.869565	A	FALSE
5163	CT12_TI3_1	1968	T	11	115	9.56522	A	FALSE
5167	CT12_TI3_2	1968	T	16	103	15.534	A	FALSE
5169	CT12_TI3_3	1968	C	1	182	0.549451	A	FALSE
5171	CT12_TI3_3	1968	T	20	182	10.989	A	FALSE
5175	CT12_TI3_1	1969	T	14	118	11.8644	G	FALSE
5177	CT12_TI3_2	1969	C	1	106	0.943396	G	FALSE
5179	CT12_TI3_2	1969	T	10	106	9.43396	G	FALSE
5183	CT12_TI3_3	1969	T	19	184	10.3261	G	FALSE
5188	CT12_TI3_2	1970	A	6	117	5.12821	T	FALSE
5189	CT12_TI3_2	1970	C	1	117	0.854701	T	FALSE
5196	CT12_TI3_1	1971	A	21	127	16.5354	C	FALSE
5199	CT12_TI3_1	1971	T	2	127	1.5748	C	FALSE
5200	CT12_TI3_2	1971	A	25	117	21.3675	C	FALSE
5204	CT12_TI3_3	1971	A	41	199	20.603	C	FALSE
5207	CT12_TI3_3	1971	T	1	199	0.502513	C	FALSE
5211	CT12_TI3_1	1972	T	19	139	13.6691	A	FALSE
5213	CT12_TI3_2	1972	C	1	122	0.819672	A	FALSE
5215	CT12_TI3_2	1972	T	14	122	11.4754	A	FALSE
5219	CT12_TI3_3	1972	T	22	209	10.5263	A	FALSE
5223	CT12_TI3_1	1973	T	38	145	26.2069	A	FALSE
5227	CT12_TI3_2	1973	T	29	127	22.8346	A	FALSE
5231	CT12_TI3_3	1973	T	34	215	15.814	A	FALSE
5235	CT12_TI3_1	1974	T	36	148	24.3243	G	FALSE
5239	CT12_TI3_2	1974	T	30	128	23.4375	G	FALSE
5243	CT12_TI3_3	1974	T	36	212	16.9811	G	FALSE
5247	CT12_TI3_1	1975	T	27	150	18	A	FALSE
5251	CT12_TI3_2	1975	T	21	121	17.3554	A	FALSE
5255	CT12_TI3_3	1975	T	29	210	13.8095	A	FALSE
5256	CT12_TI3_1	1976	A	3	155	1.93548	C	FALSE
5258	CT12_TI3_1	1976	G	6	155	3.87097	C	FALSE
5259	CT12_TI3_1	1976	T	10	155	6.45161	C	FALSE
5260	CT12_TI3_2	1976	A	3	126	2.38095	C	FALSE
5262	CT12_TI3_2	1976	G	4	126	3.1746	C	FALSE
5263	CT12_TI3_2	1976	T	8	126	6.34921	C	FALSE
5264	CT12_TI3_3	1976	A	3	209	1.43541	C	FALSE
5266	CT12_TI3_3	1976	G	5	209	2.39234	C	FALSE
5267	CT12_TI3_3	1976	T	6	209	2.87081	C	FALSE
5271	CT12_TI3_1	1977	T	32	153	20.915	G	FALSE
5275	CT12_TI3_2	1977	T	31	125	24.8	G	FALSE
5279	CT12_TI3_3	1977	T	31	204	15.1961	G	FALSE
5283	CT12_TI3_1	1978	T	38	153	24.8366	A	FALSE
5287	CT12_TI3_2	1978	T	36	124	29.0323	A	FALSE
5289	CT12_TI3_3	1978	C	1	201	0.497512	A	FALSE
5291	CT12_TI3_3	1978	T	41	201	20.398	A	FALSE
5295	CT12_TI3_1	1979	T	36	153	23.5294	G	FALSE
5299	CT12_TI3_2	1979	T	31	125	24.8	G	FALSE
5303	CT12_TI3_3	1979	T	39	201	19.403	G	FALSE
5304	CT12_TI3_1	1980	A	19	140	13.5714	T	FALSE
5305	CT12_TI3_1	1980	C	3	140	2.14286	T	FALSE
5306	CT12_TI3_1	1980	G	2	140	1.42857	T	FALSE
5308	CT12_TI3_2	1980	A	15	116	12.931	T	FALSE
5309	CT12_TI3_2	1980	C	1	116	0.862069	T	FALSE
5312	CT12_TI3_3	1980	A	17	181	9.39227	T	FALSE
5313	CT12_TI3_3	1980	C	4	181	2.20994	T	FALSE
5316	CT12_TI3_1	1981	A	16	140	11.4286	C	FALSE
5318	CT12_TI3_1	1981	G	1	140	0.714286	C	FALSE
5320	CT12_TI3_2	1981	A	10	116	8.62069	C	FALSE
5322	CT12_TI3_2	1981	G	2	116	1.72414	C	FALSE
5324	CT12_TI3_3	1981	A	12	181	6.62983	C	FALSE
5329	CT12_TI3_1	1982	C	30	140	21.4286	G	FALSE
5331	CT12_TI3_1	1982	T	4	140	2.85714	G	FALSE
5332	CT12_TI3_2	1982	A	1	115	0.869565	G	FALSE
5333	CT12_TI3_2	1982	C	25	115	21.7391	G	FALSE
5335	CT12_TI3_2	1982	T	7	115	6.08696	G	FALSE
5336	CT12_TI3_3	1982	A	1	182	0.549451	G	FALSE
5337	CT12_TI3_3	1982	C	29	182	15.9341	G	FALSE
5339	CT12_TI3_3	1982	T	3	182	1.64835	G	FALSE
5340	CT12_TI3_1	1983	A	46	126	36.5079	C	FALSE
5344	CT12_TI3_2	1983	A	41	94	43.617	C	FALSE
5348	CT12_TI3_3	1983	A	49	159	30.8176	C	FALSE
5352	CT12_TI3_1	1984	A	53	137	38.6861	C	FALSE
5356	CT12_TI3_2	1984	A	42	96	43.75	C	FALSE
5360	CT12_TI3_3	1984	A	50	169	29.5858	C	FALSE
5368	CT12_TI3_2	1985	A	12	96	12.5	C	FALSE
5372	CT12_TI3_3	1985	A	12	177	6.77966	C	FALSE
5377	CT12_TI3_1	1986	C	8	133	6.01504	A	FALSE
5379	CT12_TI3_1	1986	T	16	133	12.0301	A	FALSE
5381	CT12_TI3_2	1986	C	4	94	4.25532	A	FALSE
5383	CT12_TI3_2	1986	T	14	94	14.8936	A	FALSE
5385	CT12_TI3_3	1986	C	8	166	4.81928	A	FALSE
5387	CT12_TI3_3	1986	T	12	166	7.22892	A	FALSE
5389	CT12_TI3_1	1987	C	7	133	5.26316	G	FALSE
5391	CT12_TI3_1	1987	T	12	133	9.02256	G	FALSE
5395	CT12_TI3_2	1987	T	6	94	6.38298	G	FALSE
5399	CT12_TI3_3	1987	T	11	166	6.62651	G	FALSE
5401	CT12_TI3_1	1988	C	14	133	10.5263	A	FALSE
5402	CT12_TI3_1	1988	G	1	133	0.75188	A	FALSE
5403	CT12_TI3_1	1988	T	6	133	4.51128	A	FALSE
5405	CT12_TI3_2	1988	C	10	94	10.6383	A	FALSE
5407	CT12_TI3_2	1988	T	1	94	1.06383	A	FALSE
5409	CT12_TI3_3	1988	C	14	166	8.43373	A	FALSE
5411	CT12_TI3_3	1988	T	1	166	0.60241	A	FALSE
5413	CT12_TI3_1	1989	C	12	132	9.09091	G	FALSE
5415	CT12_TI3_1	1989	T	1	132	0.757576	G	FALSE
5417	CT12_TI3_2	1989	C	12	94	12.766	G	FALSE
5421	CT12_TI3_3	1989	C	10	166	6.0241	G	FALSE
5424	CT12_TI3_1	1990	A	7	134	5.22388	G	FALSE
5425	CT12_TI3_1	1990	C	14	134	10.4478	G	FALSE
5427	CT12_TI3_1	1990	T	31	134	23.1343	G	FALSE
5428	CT12_TI3_2	1990	A	2	96	2.08333	G	FALSE
5429	CT12_TI3_2	1990	C	7	96	7.29167	G	FALSE
5431	CT12_TI3_2	1990	T	33	96	34.375	G	FALSE
5432	CT12_TI3_3	1990	A	2	167	1.1976	G	FALSE
5433	CT12_TI3_3	1990	C	9	167	5.38922	G	FALSE
5435	CT12_TI3_3	1990	T	41	167	24.5509	G	FALSE
5437	CT12_TI3_1	1991	C	12	137	8.75912	A	FALSE
5441	CT12_TI3_2	1991	C	6	99	6.06061	A	FALSE
5453	CT12_TI3_2	2005	C	6	137	4.37956	A	FALSE
5455	CT12_TI3_2	2005	T	1	137	0.729927	A	FALSE
5465	CT12_TI3_2	2006	C	6	137	4.37956	A	FALSE
5467	CT12_TI3_2	2006	T	1	137	0.729927	A	FALSE
5477	CT12_TI3_2	2007	C	1	147	0.680272	A	FALSE
5478	CT12_TI3_2	2007	G	7	147	4.7619	A	FALSE
5484	CT12_TI3_1	2022	A	51	172	29.6512	T	FALSE
5485	CT12_TI3_1	2022	C	1	172	0.581395	T	FALSE
5488	CT12_TI3_2	2022	A	39	141	27.6596	T	FALSE
5492	CT12_TI3_3	2022	A	69	249	27.7108	T	FALSE
5493	CT12_TI3_3	2022	C	2	249	0.803213	T	FALSE
5494	CT12_TI3_3	2022	G	1	249	0.401606	T	FALSE
5496	CT12_TI3_1	2023	A	47	175	26.8571	G	FALSE
5500	CT12_TI3_2	2023	A	39	141	27.6596	G	FALSE
5504	CT12_TI3_3	2023	A	68	249	27.3092	G	FALSE
5508	CT12_TI3_1	2024	A	1	172	0.581395	T	FALSE
5509	CT12_TI3_1	2024	C	35	172	20.3488	T	FALSE
5513	CT12_TI3_2	2024	C	33	138	23.913	T	FALSE
5516	CT12_TI3_3	2024	A	1	222	0.45045	T	FALSE
5517	CT12_TI3_3	2024	C	46	222	20.7207	T	FALSE
5523	CT12_TI3_1	2025	T	31	164	18.9024	A	FALSE
5527	CT12_TI3_2	2025	T	23	130	17.6923	A	FALSE
5531	CT12_TI3_3	2025	T	34	205	16.5854	A	FALSE
5533	CT12_TI3_1	2026	C	31	179	17.3184	T	FALSE
5537	CT12_TI3_2	2026	C	23	123	18.6992	T	FALSE
5541	CT12_TI3_3	2026	C	34	195	17.4359	T	FALSE
5544	CT12_TI3_1	2027	A	30	178	16.8539	C	FALSE
5548	CT12_TI3_2	2027	A	22	122	18.0328	C	FALSE
5552	CT12_TI3_3	2027	A	34	195	17.4359	C	FALSE
5558	CT12_TI3_1	2028	G	30	217	13.8249	A	FALSE
5562	CT12_TI3_2	2028	G	16	126	12.6984	A	FALSE
5565	CT12_TI3_3	2028	C	1	222	0.45045	A	FALSE
5566	CT12_TI3_3	2028	G	28	222	12.6126	A	FALSE
5568	CT12_TI3_1	2029	A	28	217	12.9032	T	FALSE
5572	CT12_TI3_2	2029	A	16	130	12.3077	T	FALSE
5576	CT12_TI3_3	2029	A	25	236	10.5932	T	FALSE
5580	CT12_TI3_1	2030	A	23	215	10.6977	C	FALSE
5584	CT12_TI3_2	2030	A	9	134	6.71642	C	FALSE
5587	CT12_TI3_2	2030	T	2	134	1.49254	C	FALSE
5588	CT12_TI3_3	2030	A	18	227	7.92952	C	FALSE
5590	CT12_TI3_3	2030	G	1	227	0.440529	C	FALSE
5592	CT12_TI3_1	2031	A	7	200	3.5	C	FALSE
5595	CT12_TI3_1	2031	T	6	200	3	C	FALSE
5596	CT12_TI3_2	2031	A	3	135	2.22222	C	FALSE
5599	CT12_TI3_2	2031	T	4	135	2.96296	C	FALSE
5609	CT12_TI3_2	2050	C	6	209	2.87081	A	FALSE
5610	CT12_TI3_2	2050	G	3	209	1.43541	A	FALSE
5611	CT12_TI3_2	2050	T	2	209	0.956938	A	FALSE
5621	CT12_TI3_2	2054	C	6	188	3.19149	A	FALSE
5623	CT12_TI3_2	2054	T	5	188	2.65957	A	FALSE
5628	CT12_TI3_1	2055	A	4	191	2.09424	T	FALSE
5629	CT12_TI3_1	2055	C	2	191	1.04712	T	FALSE
5630	CT12_TI3_1	2055	G	4	191	2.09424	T	FALSE
5632	CT12_TI3_2	2055	A	5	181	2.76243	T	FALSE
5633	CT12_TI3_2	2055	C	3	181	1.65746	T	FALSE
5634	CT12_TI3_2	2055	G	4	181	2.20994	T	FALSE
5640	CT12_TI3_1	2056	A	8	189	4.2328	C	FALSE
5642	CT12_TI3_1	2056	G	1	189	0.529101	C	FALSE
5643	CT12_TI3_1	2056	T	5	189	2.6455	C	FALSE
5644	CT12_TI3_2	2056	A	13	179	7.26257	C	FALSE
5646	CT12_TI3_2	2056	G	2	179	1.11732	C	FALSE
5647	CT12_TI3_2	2056	T	6	179	3.35196	C	FALSE
5648	CT12_TI3_3	2056	A	12	208	5.76923	C	FALSE
5650	CT12_TI3_3	2056	G	1	208	0.480769	C	FALSE
5651	CT12_TI3_3	2056	T	3	208	1.44231	C	FALSE
5653	CT12_TI3_1	2057	C	1	188	0.531915	A	FALSE
5654	CT12_TI3_1	2057	G	4	188	2.12766	A	FALSE
5655	CT12_TI3_1	2057	T	14	188	7.44681	A	FALSE
5657	CT12_TI3_2	2057	C	2	179	1.11732	A	FALSE
5658	CT12_TI3_2	2057	G	6	179	3.35196	A	FALSE
5659	CT12_TI3_2	2057	T	13	179	7.26257	A	FALSE
5662	CT12_TI3_3	2057	G	7	208	3.36538	A	FALSE
5663	CT12_TI3_3	2057	T	8	208	3.84615	A	FALSE
5665	CT12_TI3_1	2058	C	3	190	1.57895	A	FALSE
5667	CT12_TI3_1	2058	T	10	190	5.26316	A	FALSE
5669	CT12_TI3_2	2058	C	2	178	1.1236	A	FALSE
5670	CT12_TI3_2	2058	G	3	178	1.68539	A	FALSE
5671	CT12_TI3_2	2058	T	9	178	5.05618	A	FALSE
5676	CT12_TI3_1	2059	A	9	184	4.8913	C	FALSE
5679	CT12_TI3_1	2059	T	2	184	1.08696	C	FALSE
5680	CT12_TI3_2	2059	A	10	181	5.52486	C	FALSE
5683	CT12_TI3_2	2059	T	2	181	1.10497	C	FALSE
5684	CT12_TI3_3	2059	A	18	207	8.69565	C	FALSE
5687	CT12_TI3_3	2059	T	1	207	0.483092	C	FALSE
5692	CT12_TI3_2	2117	A	2	155	1.29032	C	FALSE
5694	CT12_TI3_2	2117	G	7	155	4.51613	C	FALSE
5704	CT12_TI3_2	2168	A	1	137	0.729927	T	FALSE
5705	CT12_TI3_2	2168	C	5	137	3.64964	T	FALSE
5706	CT12_TI3_2	2168	G	2	137	1.45985	T	FALSE
5714	CT12_TI3_1	2170	G	4	122	3.27869	C	FALSE
5715	CT12_TI3_1	2170	T	4	122	3.27869	C	FALSE
5718	CT12_TI3_2	2170	G	3	90	3.33333	C	FALSE
5719	CT12_TI3_2	2170	T	4	90	4.44444	C	FALSE
5722	CT12_TI3_3	2170	G	6	214	2.80374	C	FALSE
5723	CT12_TI3_3	2170	T	6	214	2.80374	C	FALSE
5728	CT12_TI3_2	2171	A	5	93	5.37634	G	FALSE
5729	CT12_TI3_2	2171	C	1	93	1.07527	G	FALSE
5731	CT12_TI3_2	2171	T	1	93	1.07527	G	FALSE
5732	CT12_TI3_3	2171	A	7	218	3.21101	G	FALSE
5733	CT12_TI3_3	2171	C	6	218	2.75229	G	FALSE
5735	CT12_TI3_3	2171	T	3	218	1.37615	G	FALSE
5736	CT12_TI3_1	2172	A	9	115	7.82609	T	FALSE
5740	CT12_TI3_2	2172	A	11	105	10.4762	T	FALSE
5741	CT12_TI3_2	2172	C	1	105	0.952381	T	FALSE
5742	CT12_TI3_2	2172	G	2	105	1.90476	T	FALSE
5744	CT12_TI3_3	2172	A	16	218	7.33945	T	FALSE
5749	CT12_TI3_1	2173	C	9	114	7.89474	A	FALSE
5751	CT12_TI3_1	2173	T	1	114	0.877193	A	FALSE
5753	CT12_TI3_2	2173	C	9	106	8.49057	A	FALSE
5755	CT12_TI3_2	2173	T	2	106	1.88679	A	FALSE
5757	CT12_TI3_3	2173	C	12	223	5.38117	A	FALSE
5759	CT12_TI3_3	2173	T	1	223	0.44843	A	FALSE
5764	CT12_TI3_2	2174	A	2	111	1.8018	T	FALSE
5765	CT12_TI3_2	2174	C	4	111	3.6036	T	FALSE
5766	CT12_TI3_2	2174	G	2	111	1.8018	T	FALSE
5772	CT12_TI3_1	2175	A	1	117	0.854701	G	FALSE
5773	CT12_TI3_1	2175	C	15	117	12.8205	G	FALSE
5777	CT12_TI3_2	2175	C	22	116	18.9655	G	FALSE
5779	CT12_TI3_2	2175	T	4	116	3.44828	G	FALSE
5780	CT12_TI3_3	2175	A	1	220	0.454545	G	FALSE
5781	CT12_TI3_3	2175	C	30	220	13.6364	G	FALSE
5783	CT12_TI3_3	2175	T	1	220	0.454545	G	FALSE
5784	CT12_TI3_1	2176	A	4	122	3.27869	G	FALSE
5787	CT12_TI3_1	2176	T	12	122	9.83607	G	FALSE
5788	CT12_TI3_2	2176	A	13	122	10.6557	G	FALSE
5791	CT12_TI3_2	2176	T	16	122	13.1148	G	FALSE
5792	CT12_TI3_3	2176	A	13	226	5.75221	G	FALSE
5795	CT12_TI3_3	2176	T	19	226	8.40708	G	FALSE
5796	CT12_TI3_1	2177	A	1	122	0.819672	C	FALSE
5799	CT12_TI3_1	2177	T	12	122	9.83607	C	FALSE
5803	CT12_TI3_2	2177	T	17	122	13.9344	C	FALSE
5807	CT12_TI3_3	2177	T	19	226	8.40708	C	FALSE
5808	CT12_TI3_1	2178	A	12	127	9.44882	G	FALSE
5811	CT12_TI3_1	2178	T	2	127	1.5748	G	FALSE
5812	CT12_TI3_2	2178	A	20	139	14.3885	G	FALSE
5815	CT12_TI3_2	2178	T	2	139	1.43885	G	FALSE
5816	CT12_TI3_3	2178	A	13	209	6.2201	G	FALSE
5819	CT12_TI3_3	2178	T	2	209	0.956938	G	FALSE
5820	CT12_TI3_1	2179	A	13	127	10.2362	G	FALSE
5821	CT12_TI3_1	2179	C	1	127	0.787402	G	FALSE
5823	CT12_TI3_1	2179	T	1	127	0.787402	G	FALSE
5824	CT12_TI3_2	2179	A	20	139	14.3885	G	FALSE
5827	CT12_TI3_2	2179	T	4	139	2.8777	G	FALSE
5828	CT12_TI3_3	2179	A	13	205	6.34146	G	FALSE
5831	CT12_TI3_3	2179	T	1	205	0.487805	G	FALSE
5832	CT12_TI3_1	2180	A	1	133	0.75188	T	FALSE
5833	CT12_TI3_1	2180	C	15	133	11.2782	T	FALSE
5834	CT12_TI3_1	2180	G	1	133	0.75188	T	FALSE
5837	CT12_TI3_2	2180	C	25	144	17.3611	T	FALSE
5841	CT12_TI3_3	2180	C	13	208	6.25	T	FALSE
5845	CT12_TI3_1	2181	C	17	133	12.782	T	FALSE
5846	CT12_TI3_1	2181	G	6	133	4.51128	T	FALSE
5849	CT12_TI3_2	2181	C	30	151	19.8675	T	FALSE
5852	CT12_TI3_3	2181	A	1	209	0.478469	T	FALSE
5853	CT12_TI3_3	2181	C	13	209	6.2201	T	FALSE
5854	CT12_TI3_3	2181	G	1	209	0.478469	T	FALSE
5856	CT12_TI3_1	2182	A	1	154	0.649351	T	FALSE
5857	CT12_TI3_1	2182	C	16	154	10.3896	T	FALSE
5860	CT12_TI3_2	2182	A	4	163	2.45399	T	FALSE
5861	CT12_TI3_2	2182	C	20	163	12.2699	T	FALSE
5864	CT12_TI3_3	2182	A	3	183	1.63934	T	FALSE
5865	CT12_TI3_3	2182	C	35	183	19.1257	T	FALSE
5868	CT12_TI3_1	2183	A	21	164	12.8049	T	FALSE
5872	CT12_TI3_2	2183	A	41	159	25.7862	T	FALSE
5876	CT12_TI3_3	2183	A	32	191	16.7539	T	FALSE
5878	CT12_TI3_3	2183	G	1	191	0.52356	T	FALSE
5880	CT12_TI3_1	2184	A	18	165	10.9091	T	FALSE
5882	CT12_TI3_1	2184	G	4	165	2.42424	T	FALSE
5884	CT12_TI3_2	2184	A	43	156	27.5641	T	FALSE
5886	CT12_TI3_2	2184	G	3	156	1.92308	T	FALSE
5888	CT12_TI3_3	2184	A	27	189	14.2857	T	FALSE
5889	CT12_TI3_3	2184	C	2	189	1.0582	T	FALSE
5890	CT12_TI3_3	2184	G	3	189	1.5873	T	FALSE
5892	CT12_TI3_1	2185	A	16	166	9.63855	G	FALSE
5895	CT12_TI3_1	2185	T	3	166	1.80723	G	FALSE
5896	CT12_TI3_2	2185	A	38	156	24.359	G	FALSE
5897	CT12_TI3_2	2185	C	2	156	1.28205	G	FALSE
5899	CT12_TI3_2	2185	T	2	156	1.28205	G	FALSE
5900	CT12_TI3_3	2185	A	22	189	11.6402	G	FALSE
5901	CT12_TI3_3	2185	C	2	189	1.0582	G	FALSE
5904	CT12_TI3_1	2186	A	17	165	10.303	G	FALSE
5907	CT12_TI3_1	2186	T	2	165	1.21212	G	FALSE
5908	CT12_TI3_2	2186	A	44	154	28.5714	G	FALSE
5911	CT12_TI3_2	2186	T	1	154	0.649351	G	FALSE
5912	CT12_TI3_3	2186	A	27	189	14.2857	G	FALSE
5915	CT12_TI3_3	2186	T	2	189	1.0582	G	FALSE
5917	CT12_TI3_1	2187	C	3	156	1.92308	A	FALSE
5918	CT12_TI3_1	2187	G	12	156	7.69231	A	FALSE
5921	CT12_TI3_2	2187	C	2	145	1.37931	A	FALSE
5922	CT12_TI3_2	2187	G	34	145	23.4483	A	FALSE
5925	CT12_TI3_3	2187	C	4	177	2.25989	A	FALSE
5926	CT12_TI3_3	2187	G	16	177	9.03955	A	FALSE
5930	CT12_TI3_1	2188	G	7	157	4.4586	A	FALSE
5931	CT12_TI3_1	2188	T	1	157	0.636943	A	FALSE
5933	CT12_TI3_2	2188	C	1	146	0.684932	A	FALSE
5934	CT12_TI3_2	2188	G	20	146	13.6986	A	FALSE
5940	CT12_TI3_1	2189	A	7	156	4.48718	C	FALSE
5943	CT12_TI3_1	2189	T	1	156	0.641026	C	FALSE
5944	CT12_TI3_2	2189	A	24	145	16.5517	C	FALSE
5948	CT12_TI3_3	2189	A	7	177	3.9548	C	FALSE
5951	CT12_TI3_3	2189	T	2	177	1.12994	C	FALSE
5953	CT12_TI3_1	2190	C	7	140	5	A	FALSE
5954	CT12_TI3_1	2190	G	6	140	4.28571	A	FALSE
5955	CT12_TI3_1	2190	T	1	140	0.714286	A	FALSE
5958	CT12_TI3_2	2190	G	14	129	10.8527	A	FALSE
5959	CT12_TI3_2	2190	T	1	129	0.775194	A	FALSE
5968	CT12_TI3_2	2191	A	13	129	10.0775	G	FALSE
5969	CT12_TI3_2	2191	C	2	129	1.55039	G	FALSE
5981	CT12_TI3_2	2192	C	7	109	6.42202	A	FALSE
5985	CT12_TI3_3	2192	C	11	179	6.14525	A	FALSE
5988	CT12_TI3_1	2193	A	2	163	1.22699	T	FALSE
5989	CT12_TI3_1	2193	C	6	163	3.68098	T	FALSE
5990	CT12_TI3_1	2193	G	2	163	1.22699	T	FALSE
5992	CT12_TI3_2	2193	A	1	118	0.847458	T	FALSE
5993	CT12_TI3_2	2193	C	16	118	13.5593	T	FALSE
5994	CT12_TI3_2	2193	G	2	118	1.69492	T	FALSE
5997	CT12_TI3_3	2193	C	7	179	3.91061	T	FALSE
5998	CT12_TI3_3	2193	G	4	179	2.23464	T	FALSE
6005	CT12_TI3_2	2194	C	1	118	0.847458	A	FALSE
6006	CT12_TI3_2	2194	G	1	118	0.847458	A	FALSE
6007	CT12_TI3_2	2194	T	17	118	14.4068	A	FALSE
6010	CT12_TI3_3	2194	G	1	176	0.568182	A	FALSE
6011	CT12_TI3_3	2194	T	8	176	4.54545	A	FALSE
6016	CT12_TI3_2	2195	A	1	107	0.934579	T	FALSE
6018	CT12_TI3_2	2195	G	6	107	5.60748	T	FALSE
6030	CT12_TI3_2	2196	G	8	107	7.47664	T	FALSE
6036	CT12_TI3_1	2199	A	12	177	6.77966	C	FALSE
6040	CT12_TI3_2	2199	A	9	170	5.29412	C	FALSE
6051	CT12_TI3_1	2200	T	10	189	5.29101	G	FALSE
6053	CT12_TI3_2	2200	C	1	179	0.558659	G	FALSE
6055	CT12_TI3_2	2200	T	9	179	5.02793	G	FALSE
6059	CT12_TI3_3	2200	T	17	254	6.69291	G	FALSE
6061	CT12_TI3_1	2201	C	1	221	0.452489	G	FALSE
6063	CT12_TI3_1	2201	T	14	221	6.33484	G	FALSE
6067	CT12_TI3_2	2201	T	15	209	7.17703	G	FALSE
6069	CT12_TI3_3	2201	C	1	285	0.350877	G	FALSE
6071	CT12_TI3_3	2201	T	23	285	8.07018	G	FALSE
6074	CT12_TI3_1	2206	G	2	184	1.08696	C	FALSE
6075	CT12_TI3_1	2206	T	51	184	27.7174	C	FALSE
6076	CT12_TI3_2	2206	A	3	118	2.54237	C	FALSE
6079	CT12_TI3_2	2206	T	22	118	18.6441	C	FALSE
6083	CT12_TI3_3	2206	T	38	167	22.7545	C	FALSE
6088	CT12_TI3_2	2207	A	10	150	6.66667	C	FALSE
6101	CT12_TI3_2	2209	C	4	115	3.47826	T	FALSE
6102	CT12_TI3_2	2209	G	2	115	1.73913	T	FALSE
6111	CT12_TI3_1	2210	T	9	165	5.45455	A	FALSE
6115	CT12_TI3_2	2210	T	11	154	7.14286	A	FALSE
6126	CT12_TI3_2	2211	G	10	154	6.49351	A	FALSE
6132	CT12_TI3_1	2212	A	11	166	6.62651	G	FALSE
6135	CT12_TI3_1	2212	T	2	166	1.20482	G	FALSE
6136	CT12_TI3_2	2212	A	7	146	4.79452	G	FALSE
[truncated: 11,109 more rows]

## Sheet: Fig6C_Rbromii_Fixationindex
	CT12_DC1	CT12_DC2	CT12_DC3	CT12_TI1	CT12_TI2	CT12_TI3_1
CT12_DC1	0	0.019	0.016	0.053	0.096	0.056
CT12_DC2	0.019	0	0.024	0.048	0.094	0.056
CT12_DC3	0.016	0.024	0	0.063	0.104	0.072
CT12_TI1	0.053	0.048	0.063	0	0.063	0.038
CT12_TI2	0.096	0.094	0.104	0.063	0	0.05
CT12_TI3_1	0.056	0.056	0.072	0.038	0.05	0
