# Supplementary material for: Microbial-enrichment method enables high-throughput metagenomic characterization from host-rich samples
Source: Springer Nature journal article supplement (doi:10.1038/s41592-023-02025-4), 2023-10-12
Supplement: MOESM11 [file 41592_2023_2025_MOESM11_ESM.xlsx]

## Sheet: LongitudinalBiopsies_Reads
	index	Well	Concentration	PoissonConfMax	PoissonConfMin	Positives	Total	Patient	Trial	Condition	Dilutions	HD_Dilutions	Primers	Sample	Copies/uL	replicate	sample_ID	ID	subject	biopsy_weight_mg	sampleID	Copies/mg	actual reads	final reads	% host DNA	nuc unal	bacterial %
0	0	A01	25.9	28.4	23.4	400	18375	CT7	1	HD	10	2.66667	Bacteria	Ileum	690.667	1	CT7_Ileum	CT7_Ileum_1	CT-7	2.4	CT7_Ileum_1	28777.8	26492953	542010	97.5919	0.313185	2.40809
1	1	B01	27.4	29.9	25	479	20798	CT7	2	HD	10	2.66667	Bacteria	Ileum	730.667	2	CT7_Ileum	CT7_Ileum_2	CT-7	2.1	CT7_Ileum_2	34793.7	43022781	1027015	97.2044	54.0505	2.79557
2	2	C01	13.9	15.6	12.1	233	19886	CT7	3	HD	10	2.66667	Bacteria	Ileum	370.667	3	CT7_Ileum	CT7_Ileum_3	CT-7	0.6	CT7_Ileum_3	61777.8	28625576	760146	97.0252	65.517	2.97477
3	3	D01	36.9	39.7	34	656	21264	CT7	1	HD	10	2.66667	Bacteria	Asc_Colon	984	1	CT7_Asc_Colon	CT7_Asc_Colon_1	CT-7	2.1	CT7_Asc_Colon_1	46857.1	25194152	1506645	92.8826	51.386	7.11744
4	4	E01	48.5	52	45.1	754	18657	CT7	2	HD	10	2.66667	Bacteria	Asc_Colon	1293.33	2	CT7_Asc_Colon	CT7_Asc_Colon_2	CT-7	2.4	CT7_Asc_Colon_2	53888.9	12339683	909262	91.5565	53.8508	8.4435
5	5	F01	306	315	297	4614	20145	CT7	3	HD	10	2.66667	Bacteria	Asc_Colon	8160	3	CT7_Asc_Colon	CT7_Asc_Colon_3	CT-7	3	CT7_Asc_Colon_3	272000	21401730	1022167	94.6725	50.0868	5.32754
6	6	G01	20.4	22.5	18.4	385	22359	CT7	1	HD	10	2.66667	Bacteria	Des_Colon	544	1	CT7_Des_Colon	CT7_Des_Colon_1	CT-7	1.7	CT7_Des_Colon_1	32000	39767765	2516505	92.9023	39.1157	7.0977
7	7	H01	13.8	15.7	12	211	18077	CT7	2	HD	10	2.66667	Bacteria	Des_Colon	368	2	CT7_Des_Colon	CT7_Des_Colon_2	CT-7	0.7	CT7_Des_Colon_2	52571.4	19375579	269993	98.4076	74.716	1.59238
8	8	A02	16.3	18.2	14.4	280	20331	CT7	3	HD	10	2.66667	Bacteria	Des_Colon	434.667	3	CT7_Des_Colon	CT7_Des_Colon_3	CT-7	3.2	CT7_Des_Colon_3	13583.3	31538759	481621	98.2468	53.5918	1.75323
9	9	B02	379	389	368	4792	17417	CT7	1	HD	10	2.66667	Bacteria	Rectum	10106.7	1	CT7_Rectum	CT7_Rectum_1	CT-7	1.4	CT7_Rectum_1	721905	23049466	7700789	60.9774	22.128	39.0226
10	10	C02	24.9	27.4	22.4	379	18081	CT7	2	HD	10	2.66667	Bacteria	Rectum	664	2	CT7_Rectum	CT7_Rectum_2	CT-7	1.1	CT7_Rectum_2	60363.6	28949531	1232794	95.2605	35.724	4.73946
11	11	D02	19.6	21.7	17.5	335	20251	CT7	3	HD	10	2.66667	Bacteria	Rectum	522.667	3	CT7_Rectum	CT7_Rectum_3	CT-7	0.5	CT7_Rectum_3	104533	25554564	846189	96.2044	41.812	3.7956
12	12	E02	27.1	29.6	24.7	484	21216	CT8	1	HD	10	2.66667	Bacteria	Ileum	722.667	1	CT8_Ileum	CT8_Ileum_1	CT-8	4.2	CT8_Ileum_1	17206.3	27891522	419113	98.2132	79.226	1.78678
13	13	F02	8.6	10	7.2	140	19277	CT8	2	HD	10	2.66667	Bacteria	Ileum	229.333	2	CT8_Ileum	CT8_Ileum_2	CT-8	2.5	CT8_Ileum_2	9173.33	22228753	228715	98.5754	89.8878	1.42463
14	14	G02	27.4	29.9	25	483	20969	CT8	3	HD	10	2.66667	Bacteria	Ileum	730.667	3	CT8_Ileum	CT8_Ileum_3	CT-8	4.2	CT8_Ileum_3	17396.8	21527441	320961	98.2015	79.472	1.7985
15	15	H02	6.1	7.3	4.9	99	19240	CT8	1	HD	10	2.66667	Bacteria	Asc_Colon	162.667	1	CT8_Asc_Colon	CT8_Asc_Colon_1	CT-8	4.1	CT8_Asc_Colon_1	3967.48	22342297	712587	96.436	68.068	3.56398
16	16	A03	21.3	23.5	19.1	374	20853	CT8	2	HD	10	2.66667	Bacteria	Asc_Colon	568	2	CT8_Asc_Colon	CT8_Asc_Colon_2	CT-8	3.2	CT8_Asc_Colon_2	17750	28016888	2401720	90.2468	52.1638	9.75322
17	17	B03	12.1	13.9	10.4	192	18688	CT8	3	HD	10	2.66667	Bacteria	Asc_Colon	322.667	3	CT8_Asc_Colon	CT8_Asc_Colon_3	CT-8	2	CT8_Asc_Colon_3	16133.3	24462242	401831	98.135	77.8146	1.86498
18	18	C03	30.2	32.9	27.5	480	18933	CT8	1	HD	10	2.66667	Bacteria	Des_Colon	805.333	1	CT8_Des_Colon	CT8_Des_Colon_1	CT-8	4.4	CT8_Des_Colon_1	18303	20399480	143168	99.1067	89.935	0.893341
19	19	D03	101.2	106	96.4	1715	20814	CT8	2	HD	10	2.66667	Bacteria	Des_Colon	2698.67	2	CT8_Des_Colon	CT8_Des_Colon_2	CT-8	1.7	CT8_Des_Colon_2	158745	20996607	285404	98.4407	88.8773	1.55927
20	20	E03	239	247	232	3698	20099	CT8	3	HD	10	2.66667	Bacteria	Des_Colon	6373.33	3	CT8_Des_Colon	CT8_Des_Colon_3	CT-8	1.5	CT8_Des_Colon_3	424889	20166036	717784	95.9592	72.8713	4.04078
21	21	F03	24.5	26.9	22.2	406	19668	CT8	1	HD	10	2.66667	Bacteria	Rectum	653.333	1	CT8_Rectum	CT8_Rectum_1	CT-8	2	CT8_Rectum_1	32666.7	28971824	127938	99.3891	94.5419	0.610931
22	22	G03	52.5	56	49	874	20035	CT8	2	HD	10	2.66667	Bacteria	Rectum	1400	2	CT8_Rectum	CT8_Rectum_2	CT-8	3.8	CT8_Rectum_2	36842.1	20695545	231651	98.6946	82.8475	1.30542
23	23	H03	10.3	12	8.7	148	16917	CT8	3	HD	10	2.66667	Bacteria	Rectum	274.667	3	CT8_Rectum	CT8_Rectum_3	CT-8	4.9	CT8_Rectum_3	5605.44	24725991	261426	98.8276	91.6495	1.17238
24	24	A04	58.8	62.5	55	942	19330	CT13	1	HD	10	2.66667	Bacteria	Ileum	1568	1	CT13_Ileum	CT13_Ileum_1	CT-13	3	CT13_Ileum_1	52266.7	24170888	425351	98.027	57.8373	1.97297
25	25	B04	44.4	47.6	41.2	743	20067	CT13	2	HD	10	2.66667	Bacteria	Ileum	1184	2	CT13_Ileum	CT13_Ileum_2	CT-13	2.4	CT13_Ileum_2	49333.3	18546403	361060	97.6781	59.26	2.32187
26	26	C04	34.2	37	31.3	546	19069	CT13	3	HD	10	2.66667	Bacteria	Ileum	912	3	CT13_Ileum	CT13_Ileum_3	CT-13	3.6	CT13_Ileum_3	25333.3	23286028	335653	98.2414	63.8594	1.75855
27	27	D04	11.1	12.7	9.4	177	18926	CT13	1	HD	10	2.66667	Bacteria	Asc_Colon	296	1	CT13_Asc_Colon	CT13_Asc_Colon_1	CT-13	2.3	CT13_Asc_Colon_1	12869.6	31407467	43642	99.7169	98.86	0.283119
28	28	E04	13	14.8	11.3	218	19786	CT13	2	HD	10	2.66667	Bacteria	Asc_Colon	346.667	2	CT13_Asc_Colon	CT13_Asc_Colon_2	CT-13	2	CT13_Asc_Colon_2	17333.3	10191591	23918	99.7334	98.9798	0.266606
29	29	G04	39	42	36	658	20188	CT13	1	HD	10	2.66667	Bacteria	Des_Colon	1040	1	CT13_Des_Colon	CT13_Des_Colon_1	CT-13	0.5	CT13_Des_Colon_1	208000	25756736	575999	97.4194	65.9752	2.58061
30	30	H04	21.7	23.9	19.5	376	20591	CT13	2	HD	10	2.66667	Bacteria	Des_Colon	578.667	2	CT13_Des_Colon	CT13_Des_Colon_2	CT-13	1.2	CT13_Des_Colon_2	48222.2	31492106	226387	99.0686	86.9142	0.931433
31	31	A05	8.7	10.4	7.1	108	14639	CT13	3	HD	10	2.66667	Bacteria	Des_Colon	232	3	CT13_Des_Colon	CT13_Des_Colon_3	CT-13	2.7	CT13_Des_Colon_3	8592.59	31887534	21869	99.8407		0.159317
32	32	B05	2.8	3.8	2	34	14333	CT13	1	HD	10	2.66667	Bacteria	Rectum	74.6667	1	CT13_Rectum	CT13_Rectum_1	CT-13	3.1	CT13_Rectum_1	2408.6	24391007	131000	99.236	98.7775	0.764024
33	33	C05	5.2	6.6	4.1	67	15134	CT13	2	HD	10	2.66667	Bacteria	Rectum	138.667	2	CT13_Rectum	CT13_Rectum_2	CT-13	3.6	CT13_Rectum_2	3851.85	26463507	37971	99.8366	99.9407	0.163428
34	34	D05	6	7.4	4.8	81	16010	CT13	3	HD	10	2.66667	Bacteria	Rectum	160	3	CT13_Rectum	CT13_Rectum_3	CT-13	2.9	CT13_Rectum_3	5517.24	26442191	123600	99.473	91.9652	0.527007
35	35	E05	74	79	68	687	11278	CT14	1	HD	10	2.66667	Bacteria	Ileum	1973.33	1	CT14_Ileum	CT14_Ileum_1	CT-14	3.7	CT14_Ileum_1	53333.3	30060299	435543	98.3485	66.6798	1.65151
36	36	F05	6.7	8.2	5.4	88	15586	CT14	2	HD	10	2.66667	Bacteria	Ileum	178.667	2	CT14_Ileum	CT14_Ileum_2	CT-14	0.8	CT14_Ileum_2	22333.3	33852188	201013	99.0528	96.1848	0.947236
37	37	G05	22.9	25.5	20.3	299	15494	CT14	3	HD	10	2.66667	Bacteria	Ileum	610.667	3	CT14_Ileum	CT14_Ileum_3	CT-14	2.5	CT14_Ileum_3	24426.7	27749236	119789	99.5109	90.51	0.489107
38	38	H05	3.9	5.2	2.9	48	14397	CT14	1	HD	10	2.66667	Bacteria	Asc_Colon	104	1	CT14_Asc_Colon	CT14_Asc_Colon_1	CT-14	1.3	CT14_Asc_Colon_1	8000	38814515	232115	99.2415	93.6607	0.758454
39	39	A06	23.2	26	20.3	251	12867	CT14	2	HD	10	2.66667	Bacteria	Asc_Colon	618.667	2	CT14_Asc_Colon	CT14_Asc_Colon_2	CT-14	3.2	CT14_Asc_Colon_2	19333.3	24625828	125562	99.3481	80.8035	0.651893
40	40	B06	17.4	20.1	14.7	160	10915	CT14	3	HD	10	2.66667	Bacteria	Asc_Colon	464	3	CT14_Asc_Colon	CT14_Asc_Colon_3	CT-14	1.9	CT14_Asc_Colon_3	24421.1	15340067	56489	99.5825	92.3304	0.417494
41	41	C06	63.4	67.8	58.9	785	14972	CT14	1	HD	10	2.66667	Bacteria	Des_Colon	1690.67	1	CT14_Des_Colon	CT14_Des_Colon_1	CT-14	0.1	CT14_Des_Colon_1	1.69067e+06	22317801	1202060	93.8927	49.3138	6.10732
42	42	D06	27.9	30.7	25	370	15805	CT14	2	HD	10	2.66667	Bacteria	Des_Colon	744	2	CT14_Des_Colon	CT14_Des_Colon_2	CT-14	1.7	CT14_Des_Colon_2	43764.7	26252707	464974	97.8973	67.5927	2.10265
43	43	E06	29.1	31.9	26.2	398	16318	CT14	3	HD	10	2.66667	Bacteria	Des_Colon	776	3	CT14_Des_Colon	CT14_Des_Colon_3	CT-14	2.2	CT14_Des_Colon_3	35272.7	30797139	323241	98.7527	66.8258	1.24727
44	44	F06	53.8	58.1	49.5	607	13581	CT14	1	HD	10	2.66667	Bacteria	Rectum	1434.67	1	CT14_Rectum	CT14_Rectum_1	CT-14	0.2	CT14_Rectum_1	717333	24180109	748255	96.4566	54.8081	3.54338
45	0	A01	338	348	329	4643	18572	CT12	1	HD	10	2.66667	Bacteria	Ileum	9013.33	1	CT12_Ileum	CT12_Ileum_1	CT-12	3.4	CT12_Ileum_1	265098	25796290	3085334	86.6296	38.0628	13.3704
46	1	B01	3100	3160	3030	16221	17479	CT12	2	HD	10	2.66667	Bacteria	Ileum	82666.7	2	CT12_Ileum	CT12_Ileum_2	CT-12	2.3	CT12_Ileum_2	3.5942e+06	24754783	20180462	11.5005	35.0994	88.4995
47	2	C01	1010	1030	990	10573	18352	CT12	3	HD	10	2.66667	Bacteria	Ileum	26933.3	3	CT12_Ileum	CT12_Ileum_3	CT-12	5.1	CT12_Ileum_3	528105	28705278	12399103	52.0836	32.9333	47.9164
48	3	D01	21.5	23.7	19.2	345	19092	CT12	1	HD	10	2.66667	Bacteria	Asc_Colon	573.333	1	CT12_Asc_Colon	CT12_Asc_Colon_1	CT-12	0.7	CT12_Asc_Colon_1	81904.8	34975264	142738	94.7155	76.5416	5.28445
49	4	E01	84.3	88.9	79.7	1310	18946	CT12	2	HD	10	2.66667	Bacteria	Asc_Colon	2248	2	CT12_Asc_Colon	CT12_Asc_Colon_2	CT-12	3.4	CT12_Asc_Colon_2	66117.6	22984401	587005	97.0211	53.6077	2.97888
50	5	F01	165	172	158	2108	16141	CT12	3	HD	10	2.66667	Bacteria	Asc_Colon	4400	3	CT12_Asc_Colon	CT12_Asc_Colon_3	CT-12	2.9	CT12_Asc_Colon_3	151724	21677580	953120	94.9838	49.2698	5.01624
51	6	G01	2021	2061	1983	13392	16320	CT12	1	HD	10	2.66667	Bacteria	Des_Colon	53893.3	1	CT12_Des_Colon	CT12_Des_Colon_1	CT-12	3.9	CT12_Des_Colon_1	1.38188e+06	19954737	7934428	55.2122	35.3054	44.7878
52	7	H01	411	422	401	5691	19293	CT12	2	HD	10	2.66667	Bacteria	Des_Colon	10960	2	CT12_Des_Colon	CT12_Des_Colon_2	CT-12	0.6	CT12_Des_Colon_2	1.82667e+06	27124523	5522386	77.4479	35.6765	22.5521
53	8	A02	781	799	763	7881	16247	CT12	3	HD	10	2.66667	Bacteria	Des_Colon	20826.7	3	CT12_Des_Colon	CT12_Des_Colon_3	CT-12	3.5	CT12_Des_Colon_3	595048	9681636	3986185	53.799	34.8753	46.201
54	9	B02	75.9	80.4	71.5	1134	18143	CT12	1	HD	10	2.66667	Bacteria	Rectum	2024	1	CT12_Rectum	CT12_Rectum_1	CT-12	2.4	CT12_Rectum_1	84333.3	48907101	7001053	68.3516	36.3071	31.6484
55	10	C02	62	66.1	58.1	925	18006	CT12	2	HD	10	2.66667	Bacteria	Rectum	1653.33	2	CT12_Rectum	CT12_Rectum_2	CT-12	2.4	CT12_Rectum_2	68888.9	21592199	7243058	62.5642	36.5682	37.4358
56	11	D02	514	527	501	6255	17667	CT12	3	HD	10	2.66667	Bacteria	Rectum	13706.7	3	CT12_Rectum	CT12_Rectum_3	CT-12	5.9	CT12_Rectum_3	232316	28830783	15872583	38.9426	33.7553	61.0574
57	16	A03	28.5	31.2	25.7	421	17618	CT13	3	HD	10	2.66667	Bacteria	Asc_Colon	760	3	CT13_Asc_Colon	CT13_Asc_Colon_3	CT-13	4.1	CT13_Asc_Colon_3	18536.6	24059566	177073	99.18	85.2242	0.819988
