# Supplementary material for: Microbial-enrichment method enables high-throughput metagenomic characterization from host-rich samples
Source: Springer Nature journal article supplement (doi:10.1038/s41592-023-02025-4), 2023-10-12
Supplement: MOESM12 [file 41592_2023_2025_MOESM12_ESM.xlsx]

## Sheet: LongitudinalBiopsies_Loads
	index	Well	Concentration	PoissonConfMax	PoissonConfMin	Positives	Total	Patient	Trial	Condition	Dilutions	HD_Dilutions	Primers	Sample	Copies/uL	replicate	sample_ID	ID	subject	biopsy_weight_mg	sampleID	Copies/mg
0	0	A01	25.9	28.4	23.4	400	18375	CT7	1	HD	10	2.66667	Bacteria	Ileum	690.667	1	CT7_Ileum	CT7_Ileum_1	CT-7	2.4	CT7_Ileum_1	28777.8
1	1	B01	27.4	29.9	25	479	20798	CT7	2	HD	10	2.66667	Bacteria	Ileum	730.667	2	CT7_Ileum	CT7_Ileum_2	CT-7	2.1	CT7_Ileum_2	34793.7
2	2	C01	13.9	15.6	12.1	233	19886	CT7	3	HD	10	2.66667	Bacteria	Ileum	370.667	3	CT7_Ileum	CT7_Ileum_3	CT-7	0.6	CT7_Ileum_3	61777.8
3	3	D01	36.9	39.7	34	656	21264	CT7	1	HD	10	2.66667	Bacteria	Asc_Colon	984	1	CT7_Asc_Colon	CT7_Asc_Colon_1	CT-7	2.1	CT7_Asc_Colon_1	46857.1
4	4	E01	48.5	52	45.1	754	18657	CT7	2	HD	10	2.66667	Bacteria	Asc_Colon	1293.33	2	CT7_Asc_Colon	CT7_Asc_Colon_2	CT-7	2.4	CT7_Asc_Colon_2	53888.9
5	5	F01	306	315	297	4614	20145	CT7	3	HD	10	2.66667	Bacteria	Asc_Colon	8160	3	CT7_Asc_Colon	CT7_Asc_Colon_3	CT-7	3	CT7_Asc_Colon_3	272000
6	6	G01	20.4	22.5	18.4	385	22359	CT7	1	HD	10	2.66667	Bacteria	Des_Colon	544	1	CT7_Des_Colon	CT7_Des_Colon_1	CT-7	1.7	CT7_Des_Colon_1	32000
7	7	H01	13.8	15.7	12	211	18077	CT7	2	HD	10	2.66667	Bacteria	Des_Colon	368	2	CT7_Des_Colon	CT7_Des_Colon_2	CT-7	0.7	CT7_Des_Colon_2	52571.4
8	8	A02	16.3	18.2	14.4	280	20331	CT7	3	HD	10	2.66667	Bacteria	Des_Colon	434.667	3	CT7_Des_Colon	CT7_Des_Colon_3	CT-7	3.2	CT7_Des_Colon_3	13583.3
9	9	B02	379	389	368	4792	17417	CT7	1	HD	10	2.66667	Bacteria	Rectum	10106.7	1	CT7_Rectum	CT7_Rectum_1	CT-7	1.4	CT7_Rectum_1	721905
10	10	C02	24.9	27.4	22.4	379	18081	CT7	2	HD	10	2.66667	Bacteria	Rectum	664	2	CT7_Rectum	CT7_Rectum_2	CT-7	1.1	CT7_Rectum_2	60363.6
11	11	D02	19.6	21.7	17.5	335	20251	CT7	3	HD	10	2.66667	Bacteria	Rectum	522.667	3	CT7_Rectum	CT7_Rectum_3	CT-7	0.5	CT7_Rectum_3	104533
12	12	E02	27.1	29.6	24.7	484	21216	CT8	1	HD	10	2.66667	Bacteria	Ileum	722.667	1	CT8_Ileum	CT8_Ileum_1	CT-8	4.2	CT8_Ileum_1	17206.3
13	13	F02	8.6	10	7.2	140	19277	CT8	2	HD	10	2.66667	Bacteria	Ileum	229.333	2	CT8_Ileum	CT8_Ileum_2	CT-8	2.5	CT8_Ileum_2	9173.33
14	14	G02	27.4	29.9	25	483	20969	CT8	3	HD	10	2.66667	Bacteria	Ileum	730.667	3	CT8_Ileum	CT8_Ileum_3	CT-8	4.2	CT8_Ileum_3	17396.8
15	15	H02	6.1	7.3	4.9	99	19240	CT8	1	HD	10	2.66667	Bacteria	Asc_Colon	162.667	1	CT8_Asc_Colon	CT8_Asc_Colon_1	CT-8	4.1	CT8_Asc_Colon_1	3967.48
16	16	A03	21.3	23.5	19.1	374	20853	CT8	2	HD	10	2.66667	Bacteria	Asc_Colon	568	2	CT8_Asc_Colon	CT8_Asc_Colon_2	CT-8	3.2	CT8_Asc_Colon_2	17750
17	17	B03	12.1	13.9	10.4	192	18688	CT8	3	HD	10	2.66667	Bacteria	Asc_Colon	322.667	3	CT8_Asc_Colon	CT8_Asc_Colon_3	CT-8	2	CT8_Asc_Colon_3	16133.3
18	18	C03	30.2	32.9	27.5	480	18933	CT8	1	HD	10	2.66667	Bacteria	Des_Colon	805.333	1	CT8_Des_Colon	CT8_Des_Colon_1	CT-8	4.4	CT8_Des_Colon_1	18303
19	19	D03	101.2	106	96.4	1715	20814	CT8	2	HD	10	2.66667	Bacteria	Des_Colon	2698.67	2	CT8_Des_Colon	CT8_Des_Colon_2	CT-8	1.7	CT8_Des_Colon_2	158745
20	20	E03	239	247	232	3698	20099	CT8	3	HD	10	2.66667	Bacteria	Des_Colon	6373.33	3	CT8_Des_Colon	CT8_Des_Colon_3	CT-8	1.5	CT8_Des_Colon_3	424889
21	21	F03	24.5	26.9	22.2	406	19668	CT8	1	HD	10	2.66667	Bacteria	Rectum	653.333	1	CT8_Rectum	CT8_Rectum_1	CT-8	2	CT8_Rectum_1	32666.7
22	22	G03	52.5	56	49	874	20035	CT8	2	HD	10	2.66667	Bacteria	Rectum	1400	2	CT8_Rectum	CT8_Rectum_2	CT-8	3.8	CT8_Rectum_2	36842.1
23	23	H03	10.3	12	8.7	148	16917	CT8	3	HD	10	2.66667	Bacteria	Rectum	274.667	3	CT8_Rectum	CT8_Rectum_3	CT-8	4.9	CT8_Rectum_3	5605.44
24	24	A04	58.8	62.5	55	942	19330	CT13	1	HD	10	2.66667	Bacteria	Ileum	1568	1	CT13_Ileum	CT13_Ileum_1	CT-13	3	CT13_Ileum_1	52266.7
25	25	B04	44.4	47.6	41.2	743	20067	CT13	2	HD	10	2.66667	Bacteria	Ileum	1184	2	CT13_Ileum	CT13_Ileum_2	CT-13	2.4	CT13_Ileum_2	49333.3
26	26	C04	34.2	37	31.3	546	19069	CT13	3	HD	10	2.66667	Bacteria	Ileum	912	3	CT13_Ileum	CT13_Ileum_3	CT-13	3.6	CT13_Ileum_3	25333.3
27	27	D04	11.1	12.7	9.4	177	18926	CT13	1	HD	10	2.66667	Bacteria	Asc_Colon	296	1	CT13_Asc_Colon	CT13_Asc_Colon_1	CT-13	2.3	CT13_Asc_Colon_1	12869.6
28	28	E04	13	14.8	11.3	218	19786	CT13	2	HD	10	2.66667	Bacteria	Asc_Colon	346.667	2	CT13_Asc_Colon	CT13_Asc_Colon_2	CT-13	2	CT13_Asc_Colon_2	17333.3
29	29	G04	39	42	36	658	20188	CT13	1	HD	10	2.66667	Bacteria	Des_Colon	1040	1	CT13_Des_Colon	CT13_Des_Colon_1	CT-13	0.5	CT13_Des_Colon_1	208000
30	30	H04	21.7	23.9	19.5	376	20591	CT13	2	HD	10	2.66667	Bacteria	Des_Colon	578.667	2	CT13_Des_Colon	CT13_Des_Colon_2	CT-13	1.2	CT13_Des_Colon_2	48222.2
31	31	A05	8.7	10.4	7.1	108	14639	CT13	3	HD	10	2.66667	Bacteria	Des_Colon	232	3	CT13_Des_Colon	CT13_Des_Colon_3	CT-13	2.7	CT13_Des_Colon_3	8592.59
32	32	B05	2.8	3.8	2	34	14333	CT13	1	HD	10	2.66667	Bacteria	Rectum	74.6667	1	CT13_Rectum	CT13_Rectum_1	CT-13	3.1	CT13_Rectum_1	2408.6
33	33	C05	5.2	6.6	4.1	67	15134	CT13	2	HD	10	2.66667	Bacteria	Rectum	138.667	2	CT13_Rectum	CT13_Rectum_2	CT-13	3.6	CT13_Rectum_2	3851.85
34	34	D05	6	7.4	4.8	81	16010	CT13	3	HD	10	2.66667	Bacteria	Rectum	160	3	CT13_Rectum	CT13_Rectum_3	CT-13	2.9	CT13_Rectum_3	5517.24
35	35	E05	74	79	68	687	11278	CT14	1	HD	10	2.66667	Bacteria	Ileum	1973.33	1	CT14_Ileum	CT14_Ileum_1	CT-14	3.7	CT14_Ileum_1	53333.3
36	36	F05	6.7	8.2	5.4	88	15586	CT14	2	HD	10	2.66667	Bacteria	Ileum	178.667	2	CT14_Ileum	CT14_Ileum_2	CT-14	0.8	CT14_Ileum_2	22333.3
37	37	G05	22.9	25.5	20.3	299	15494	CT14	3	HD	10	2.66667	Bacteria	Ileum	610.667	3	CT14_Ileum	CT14_Ileum_3	CT-14	2.5	CT14_Ileum_3	24426.7
38	38	H05	3.9	5.2	2.9	48	14397	CT14	1	HD	10	2.66667	Bacteria	Asc_Colon	104	1	CT14_Asc_Colon	CT14_Asc_Colon_1	CT-14	1.3	CT14_Asc_Colon_1	8000
39	39	A06	23.2	26	20.3	251	12867	CT14	2	HD	10	2.66667	Bacteria	Asc_Colon	618.667	2	CT14_Asc_Colon	CT14_Asc_Colon_2	CT-14	3.2	CT14_Asc_Colon_2	19333.3
40	40	B06	17.4	20.1	14.7	160	10915	CT14	3	HD	10	2.66667	Bacteria	Asc_Colon	464	3	CT14_Asc_Colon	CT14_Asc_Colon_3	CT-14	1.9	CT14_Asc_Colon_3	24421.1
41	41	C06	63.4	67.8	58.9	785	14972	CT14	1	HD	10	2.66667	Bacteria	Des_Colon	1690.67	1	CT14_Des_Colon	CT14_Des_Colon_1	CT-14	0.1	CT14_Des_Colon_1	1.69067e+06
42	42	D06	27.9	30.7	25	370	15805	CT14	2	HD	10	2.66667	Bacteria	Des_Colon	744	2	CT14_Des_Colon	CT14_Des_Colon_2	CT-14	1.7	CT14_Des_Colon_2	43764.7
43	43	E06	29.1	31.9	26.2	398	16318	CT14	3	HD	10	2.66667	Bacteria	Des_Colon	776	3	CT14_Des_Colon	CT14_Des_Colon_3	CT-14	2.2	CT14_Des_Colon_3	35272.7
44	44	F06	53.8	58.1	49.5	607	13581	CT14	1	HD	10	2.66667	Bacteria	Rectum	1434.67	1	CT14_Rectum	CT14_Rectum_1	CT-14	0.2	CT14_Rectum_1	717333
45	0	A01	338	348	329	4643	18572	CT12	1	HD	10	2.66667	Bacteria	Ileum	9013.33	1	CT12_Ileum	CT12_Ileum_1	CT-12	3.4	CT12_Ileum_1	265098
46	1	B01	3100	3160	3030	16221	17479	CT12	2	HD	10	2.66667	Bacteria	Ileum	82666.7	2	CT12_Ileum	CT12_Ileum_2	CT-12	2.3	CT12_Ileum_2	3.5942e+06
47	2	C01	1010	1030	990	10573	18352	CT12	3	HD	10	2.66667	Bacteria	Ileum	26933.3	3	CT12_Ileum	CT12_Ileum_3	CT-12	5.1	CT12_Ileum_3	528105
48	3	D01	21.5	23.7	19.2	345	19092	CT12	1	HD	10	2.66667	Bacteria	Asc_Colon	573.333	1	CT12_Asc_Colon	CT12_Asc_Colon_1	CT-12	0.7	CT12_Asc_Colon_1	81904.8
49	4	E01	84.3	88.9	79.7	1310	18946	CT12	2	HD	10	2.66667	Bacteria	Asc_Colon	2248	2	CT12_Asc_Colon	CT12_Asc_Colon_2	CT-12	3.4	CT12_Asc_Colon_2	66117.6
50	5	F01	165	172	158	2108	16141	CT12	3	HD	10	2.66667	Bacteria	Asc_Colon	4400	3	CT12_Asc_Colon	CT12_Asc_Colon_3	CT-12	2.9	CT12_Asc_Colon_3	151724
51	6	G01	2021	2061	1983	13392	16320	CT12	1	HD	10	2.66667	Bacteria	Des_Colon	53893.3	1	CT12_Des_Colon	CT12_Des_Colon_1	CT-12	3.9	CT12_Des_Colon_1	1.38188e+06
52	7	H01	411	422	401	5691	19293	CT12	2	HD	10	2.66667	Bacteria	Des_Colon	10960	2	CT12_Des_Colon	CT12_Des_Colon_2	CT-12	0.6	CT12_Des_Colon_2	1.82667e+06
53	8	A02	781	799	763	7881	16247	CT12	3	HD	10	2.66667	Bacteria	Des_Colon	20826.7	3	CT12_Des_Colon	CT12_Des_Colon_3	CT-12	3.5	CT12_Des_Colon_3	595048
54	9	B02	75.9	80.4	71.5	1134	18143	CT12	1	HD	10	2.66667	Bacteria	Rectum	2024	1	CT12_Rectum	CT12_Rectum_1	CT-12	2.4	CT12_Rectum_1	84333.3
55	10	C02	62	66.1	58.1	925	18006	CT12	2	HD	10	2.66667	Bacteria	Rectum	1653.33	2	CT12_Rectum	CT12_Rectum_2	CT-12	2.4	CT12_Rectum_2	68888.9
56	11	D02	514	527	501	6255	17667	CT12	3	HD	10	2.66667	Bacteria	Rectum	13706.7	3	CT12_Rectum	CT12_Rectum_3	CT-12	5.9	CT12_Rectum_3	232316
57	16	A03	28.5	31.2	25.7	421	17618	CT13	3	HD	10	2.66667	Bacteria	Asc_Colon	760	3	CT13_Asc_Colon	CT13_Asc_Colon_3	CT-13	4.1	CT13_Asc_Colon_3	18536.6
