# Supplementary material for: Microbial-enrichment method enables high-throughput metagenomic characterization from host-rich samples
Source: Springer Nature journal article supplement (doi:10.1038/s41592-023-02025-4), 2023-10-12
Supplement: MOESM13 [file 41592_2023_2025_MOESM13_ESM.xlsx]

## Sheet: CT7_PCA_Genes5k
	ID	PC1	PC2	PC3	PC4	PC5	PC6	Patient	Location	Rep
0	CT7_TI_1	196.193	-64.8786	46.4736	-10.8772	-92.1132	15.3264	CT7	TI	1
1	CT7_TI_2	100.724	68.5809	-40.3728	-98.3307	-4.27906	-73.3931	CT7	TI	2
2	CT7_TI_3	173.639	-62.3519	36.9858	3.88055	115.418	-18.6079	CT7	TI	3
3	CT7_AC_1	104.953	46.1418	-35.9565	-15.9397	20.3156	116.335	CT7	AC	1
4	CT7_AC_2	124.409	31.5218	-60.392	122.481	-15.186	-41.8359	CT7	AC	2
5	CT7_AC_3	188.882	-18.4423	0.0667271	-13.4703	-18.167	-0.0998623	CT7	AC	3
6	CT7_DC_1	-120.704	19.3778	-36.8637	0.461578	4.56002	15.1324	CT7	DC	1
7	CT7_DC_2	-80.975	94.9895	128.444	24.8398	-0.623974	-3.93313	CT7	DC	2
8	CT7_DC_3	-142.553	-4.07226	-19.2872	-0.0264084	7.00685	6.4094	CT7	DC	3
9	CT7_R_1	-162.999	-12.4212	-23.015	-2.71186	-2.74575	4.56299	CT7	R	1
10	CT7_R_2	-189.408	-45.4244	1.42094	-5.61472	-8.78433	-9.91391	CT7	R	2
11	CT7_R_3	-192.162	-53.0212	2.49571	-4.69253	-5.40075	-9.98254	CT7	R	3

## Sheet: CT8_PCA_Genes5k
	ID	PC1	PC2	PC3	PC4	PC5	PC6	Patient	Location	Rep
0	CT8_TI_1	-51.5698	-8.18143	-8.40241	-5.30443	-7.22652	-19.8714	CT8	TI	1
1	CT8_TI_2	29.0101	-16.8456	124.397	-39.2647	-0.0670853	48.2271	CT8	TI	2
2	CT8_TI_3	-64.1042	1.35056	1.63672	-12.8642	-15.3938	-13.3121	CT8	TI	3
3	CT8_AC_1	-2.91097	-2.77038	12.5314	-11.3303	1.27827	-4.7565	CT8	AC	1
4	CT8_AC_2	-80.4349	2.27258	-11.687	-8.88995	-10.8749	-21.6951	CT8	AC	2
5	CT8_AC_3	-54.7755	1.47329	-1.26347	-17.8251	-14.1209	-27.2839	CT8	AC	3
6	CT8_DC_1	75.2487	144.085	-8.71386	-4.1037	9.80522	-1.2153	CT8	DC	1
7	CT8_DC_2	26.1262	-33.7889	-12.5698	13.8411	130.299	-15.193	CT8	DC	2
8	CT8_DC_3	-64.8255	-0.871882	-14.0708	-6.81118	-11.7101	-17.8747	CT8	DC	3
9	CT8_R_1	147.771	-55.2602	-57.8179	-61.9696	-36.6999	-8.20303	CT8	R	1
10	CT8_R_2	-30.0583	-7.73061	-53.6996	38.9537	-7.09838	116.46	CT8	R	2
11	CT8_R_3	70.5234	-23.7321	29.6595	115.568	-38.1911	-35.2817	CT8	R	3

## Sheet: CT12_PCA_Genes5k
	ID	PC1	PC2	PC3	PC4	PC5	PC6	Patient	Location	Rep
0	CT12_TI_1	-27.9314	-1.34611	7.56855	34.9157	5.55108	-0.878574	CT12	TI	1
1	CT12_TI_2	-25.3881	-18.828	-5.59196	-7.31029	1.95968	-2.0095	CT12	TI	2
2	CT12_TI_3	-31.8078	-1.69855	4.35282	27.4307	-1.0501	4.40625	CT12	TI	3
3	CT12_AC_1	264.399	-13.1028	-1.103	1.23755	0.181474	0.585361	CT12	AC	1
4	CT12_AC_2	3.733	82.9032	-33.276	-1.92233	0.0616007	0.486839	CT12	AC	2
5	CT12_AC_3	-2.9233	41.4884	54.4509	-12.2889	0.167244	-1.05812	CT12	AC	3
6	CT12_DC_1	-30.8183	-15.1599	-3.92441	-3.88525	-13.2872	1.27618	CT12	DC	1
7	CT12_DC_2	-32.7282	-14.6735	-1.67838	-9.52095	-10.2358	19.2607	CT12	DC	2
8	CT12_DC_3	-33.0659	-17.1654	-6.43779	-12.9005	23.318	7.55974	CT12	DC	3
9	CT12_R_1	-24.726	-11.4368	-5.09921	-5.02834	-6.3881	-11.2897	CT12	R	1
10	CT12_R_2	-30.8904	-15.0899	-3.33231	-8.28881	5.09433	-11.4013	CT12	R	2
11	CT12_R_3	-27.8532	-15.8905	-5.9292	-2.43858	-5.37227	-6.93782	CT12	R	3

## Sheet: CT13_PCA_Genes5k
	ID	PC1	PC2	PC3	PC4	PC5	PC6	Patient	Location	Rep
0	CT13_TI_1	142.903	-22.3984	-0.629975	21.17	-12.4836	12.0435	CT13	TI	1
1	CT13_TI_2	142.448	-27.3825	-5.72305	4.15075	-48.5354	-31.4323	CT13	TI	2
2	CT13_TI_3	137.663	-21.9592	-7.15496	-37.9588	50.6312	-26.9276	CT13	TI	3
3	CT13_AC_1	-84.7637	-15.7846	-12.3841	62.3019	29.8602	-21.1351	CT13	AC	1
4	CT13_AC_2	-89.2564	-18.1316	-14.0582	-18.1581	-13.134	2.37498	CT13	AC	2
5	CT13_AC_3	45.057	112.993	-47.267	0.727527	-2.49154	-2.76213	CT13	AC	3
6	CT13_DC_1	124.814	-7.37121	12.0813	9.32717	12.9935	56.5974	CT13	DC	1
7	CT13_DC_2	-25.59	41.2749	104.703	-0.360128	-1.12185	-12.846	CT13	DC	2
8	CT13_DC_3	-97.9337	-11.8222	-11.1889	-7.7445	-3.49504	0.31289	CT13	DC	3
9	CT13_R_1	-96.8624	-8.68795	-8.02695	-9.8466	-3.56227	8.51446	CT13	R	1
10	CT13_R_2	-98.1685	-11.9929	-11.5372	-8.13499	-3.69933	0.699286	CT13	R	2
11	CT13_R_3	-100.311	-8.73779	1.18632	-15.4743	-4.96183	14.5605	CT13	R	3

## Sheet: CT14_PCA_Genes5k
	ID	PC1	PC2	PC3	PC4	PC5	PC6	Patient	Location	Rep
0	CT14_TI_1	-76.8116	-5.26278	-16.142	8.12277	12.5462	-29.7846	CT14	TI	1
1	CT14_TI_2	146.035	-1.65659	-1.52894	47.4016	87.1783	-4.74732	CT14	TI	2
2	CT14_TI_3	76.9219	121.4	-27.1034	-53.3314	-10.2019	0.654043	CT14	TI	3
3	CT14_AC_1	114.83	-2.25584	-2.09808	79.7289	-75.6805	-7.23813	CT14	AC	1
4	CT14_AC_2	-18.7432	5.56298	139.683	-18.0883	-2.58121	0.0601237	CT14	AC	2
5	CT14_AC_3	135.4	-88.4104	-21.4122	-78.7984	-14.9584	0.986898	CT14	AC	3
6	CT14_DC_1	-111.28	-8.65805	-18.2398	-0.50815	2.60326	-15.8818	CT14	DC	1
7	CT14_DC_2	-94.6064	-6.57846	-18.4035	3.29507	-3.09687	-13.8066	CT14	DC	2
8	CT14_DC_3	-66.9517	-6.19233	-15.4988	13.4869	3.18787	86.9515	CT14	DC	3
9	CT14_R_1	-104.795	-7.94894	-19.2567	-1.30884	1.00338	-17.1942	CT14	R	1

## Sheet: CT7_PCA_Pathways
ID	PC1	PC2	PC3	PC4	PC5	PC6	index	taxa	relative_abundance	Patient	Location	present_bool	location_number
CT7_TI_1	-7.25366	-4.80732	-3.17581	-7.41019	0.0970502	-1.47624	0	1CMET2-PWY: folate transformations III (E. coli)	0.000399915	CT7	TI	TRUE	0
CT7_TI_2	-10.2241	4.98251	-2.23366	-2.41785	-3.6983	2.06735	1	1CMET2-PWY: folate transformations III (E. coli)	0.000438638	CT7	TI	TRUE	0
CT7_TI_3	-6.37604	-3.7604	2.80923	-0.256713	3.42915	1.52406	2	1CMET2-PWY: folate transformations III (E. coli)	0.000257186	CT7	TI	TRUE	0
CT7_AC_1	-10.6077	5.62722	-0.795411	8.12691	2.41517	0.139338	3	1CMET2-PWY: folate transformations III (E. coli)	0.000536112	CT7	AC	TRUE	1
CT7_AC_2	-8.76804	-2.83477	4.59832	-1.56191	5.48017	-2.47862	4	1CMET2-PWY: folate transformations III (E. coli)	0.000411365	CT7	AC	TRUE	1
CT7_AC_3	-11.4322	3.8556	-0.189949	0.737804	-3.9237	-1.41328	5	1CMET2-PWY: folate transformations III (E. coli)	0.000598395	CT7	AC	TRUE	1
CT7_DC_1	10.0117	5.00676	-2.48797	-2.23686	3.60082	7.36839	6	1CMET2-PWY: folate transformations III (E. coli)	0.000570787	CT7	DC	TRUE	2
CT7_DC_2	1.26863	-9.69483	-4.80559	3.28736	-4.16873	1.2963	7	1CMET2-PWY: folate transformations III (E. coli)	0.000265348	CT7	DC	TRUE	2
CT7_DC_3	12.7101	-2.11138	-5.75063	1.75152	2.92258	-4.73261	8	1CMET2-PWY: folate transformations III (E. coli)	0.000551468	CT7	DC	TRUE	2
CT7_R_1	11.5688	10.3907	1.66062	-2.28974	-1.95576	-4.04362	9	1CMET2-PWY: folate transformations III (E. coli)	0.000610874	CT7	R	TRUE	3
CT7_R_2	11.7415	-2.55901	2.34988	1.50306	-0.184442	0.542937	10	1CMET2-PWY: folate transformations III (E. coli)	0.000587242	CT7	R	TRUE	3
CT7_R_3	7.36092	-4.0951	8.02097	0.766608	-4.014	1.20601	11	1CMET2-PWY: folate transformations III (E. coli)	0.000533214	CT7	R	TRUE	3

## Sheet: CT8_PCA_Pathways
ID	PC1	PC2	PC3	PC4	PC5	PC6	index	taxa	relative_abundance	Patient	Location	present_bool	location_number
CT8_TI_1	2.62351	-4.37487	7.28433	-4.08025	-3.19809	0.755274	12	1CMET2-PWY: folate transformations III (E. coli)	0.000296863	CT8	TI	TRUE	0
CT8_TI_2	-5.76189	-0.661135	-1.67259	-1.32381	-1.34727	-0.832812	13	1CMET2-PWY: folate transformations III (E. coli)	0.000118686	CT8	TI	TRUE	0
CT8_TI_3	-4.82441	-0.218519	-1.40838	1.03002	1.93954	3.64046	14	1CMET2-PWY: folate transformations III (E. coli)	0.000261403	CT8	TI	TRUE	0
CT8_AC_1	14.6483	10.7915	0.55838	-2.3945	0.263393	0.374946	15	1CMET2-PWY: folate transformations III (E. coli)	0.00038247	CT8	AC	TRUE	1
CT8_AC_2	21.3086	-6.99642	-4.32042	0.752539	0.348942	-0.167459	16	1CMET2-PWY: folate transformations III (E. coli)	0.000603325	CT8	AC	TRUE	1
CT8_AC_3	-1.05313	-1.68001	5.01363	0.379902	5.92236	-1.50589	17	1CMET2-PWY: folate transformations III (E. coli)	0.000217475	CT8	AC	TRUE	1
CT8_DC_1	-6.08428	0.225169	-1.70465	-0.746887	-0.458911	-0.718316	18	1CMET2-PWY: folate transformations III (E. coli)	0	CT8	DC	FALSE	2
CT8_DC_2	-5.43157	-0.212617	-1.3101	0.818497	-0.37742	1.3033	19	1CMET2-PWY: folate transformations III (E. coli)	0.000140542	CT8	DC	TRUE	2
CT8_DC_3	1.6019	1.86354	3.12121	8.14396	-2.40751	-0.753746	20	1CMET2-PWY: folate transformations III (E. coli)	0.000342669	CT8	DC	TRUE	2
CT8_R_1	-6.08428	0.225169	-1.70465	-0.746887	-0.458911	-0.718316	21	1CMET2-PWY: folate transformations III (E. coli)	0	CT8	R	FALSE	3
CT8_R_2	-5.29218	0.888185	-2.8782	-1.55589	-0.355956	-2.6915	22	1CMET2-PWY: folate transformations III (E. coli)	0.00022753	CT8	R	TRUE	3
CT8_R_3	-5.65065	0.150054	-0.978576	-0.276683	0.129832	1.31406	23	1CMET2-PWY: folate transformations III (E. coli)	0	CT8	R	FALSE	3

## Sheet: CT12_PCA_Pathways
ID	PC1	PC2	PC3	PC4	PC5	PC6	index	taxa	relative_abundance	Patient	Location	present_bool	location_number
CT12_TI_1	-2.72371	-7.29311	-4.35734	-2.75771	4.00779	0.84231	24	1CMET2-PWY: folate transformations III (E. coli)	0.000838138	CT12	TI	TRUE	0
CT12_TI_2	-11.1122	11.2547	-11.0684	3.02386	1.11633	3.92395	25	1CMET2-PWY: folate transformations III (E. coli)	0.000901024	CT12	TI	TRUE	0
CT12_TI_3	-11.5832	4.34484	12.6084	-5.63545	4.23203	2.88252	26	1CMET2-PWY: folate transformations III (E. coli)	0.000867529	CT12	TI	TRUE	0
CT12_AC_1	30.1041	5.01395	2.33956	-0.334785	-3.85793	-0.852722	27	1CMET2-PWY: folate transformations III (E. coli)	0	CT12	AC	FALSE	1
CT12_AC_2	24.7089	2.34832	0.946884	-0.20148	-3.36513	1.6946	28	1CMET2-PWY: folate transformations III (E. coli)	0.000617175	CT12	AC	TRUE	1
CT12_AC_3	15.4197	-4.17539	-2.48831	0.616985	11.6641	-3.48676	29	1CMET2-PWY: folate transformations III (E. coli)	0.000656273	CT12	AC	TRUE	1
CT12_DC_1	-8.88897	-4.74656	2.84443	-8.41674	-4.10893	-2.28376	30	1CMET2-PWY: folate transformations III (E. coli)	0.000847387	CT12	DC	TRUE	2
CT12_DC_2	-3.28996	-4.84637	-1.96673	-0.747889	-5.2991	9.22658	31	1CMET2-PWY: folate transformations III (E. coli)	0.000863482	CT12	DC	TRUE	2
CT12_DC_3	-5.82383	-5.9747	-7.53916	-2.92309	-4.3449	-5.84161	32	1CMET2-PWY: folate transformations III (E. coli)	0.000844221	CT12	DC	TRUE	2
CT12_R_1	-9.92651	-1.26586	5.55251	11.8299	-4.28299	-6.47129	33	1CMET2-PWY: folate transformations III (E. coli)	0.000830497	CT12	R	TRUE	3
CT12_R_2	-5.20691	-4.97528	3.44304	8.38485	3.01257	5.08816	34	1CMET2-PWY: folate transformations III (E. coli)	0.000859918	CT12	R	TRUE	3
CT12_R_3	-11.6774	10.3155	-0.314895	-2.83842	1.22616	-4.72197	35	1CMET2-PWY: folate transformations III (E. coli)	0.000881505	CT12	R	TRUE	3

## Sheet: CT13_PCA_Pathways
ID	PC1	PC2	PC3	PC4	PC5	PC6	index	taxa	relative_abundance	Patient	Location	present_bool	location_number
CT13_TI_1	8.595	-4.34339	-2.10724	0.300851	-0.0725919	6.19991e-16	36	1CMET2-PWY: folate transformations III (E. coli)	0.000578116	CT13	TI	TRUE	0
CT13_TI_2	-2.26317	-1.06897	2.5644	3.6992	0.0334422	6.19991e-16	37	1CMET2-PWY: folate transformations III (E. coli)	0.000538696	CT13	TI	TRUE	0
CT13_TI_3	-0.92044	-2.58203	4.80448	-2.21568	0.0967254	6.19991e-16	38	1CMET2-PWY: folate transformations III (E. coli)	0.000363327	CT13	TI	TRUE	0
CT13_AC_1	-1.78391	0.403559	-0.874755	-0.23782	-0.343417	8.75542e-17	39	1CMET2-PWY: folate transformations III (E. coli)	0	CT13	AC	FALSE	1
CT13_AC_2	-1.78391	0.403559	-0.874755	-0.23782	-0.343417	1.17253e-15	40	1CMET2-PWY: folate transformations III (E. coli)	0	CT13	AC	FALSE	1
CT13_AC_3	-1.78391	0.403559	-0.874755	-0.23782	-0.343417	7.81846e-16	41	1CMET2-PWY: folate transformations III (E. coli)	0.000140283	CT13	AC	TRUE	1
CT13_DC_1	8.25036	4.63099	1.95508	0.0675298	-0.0789652	6.19991e-16	42	1CMET2-PWY: folate transformations III (E. coli)	0.00044546	CT13	DC	TRUE	2
CT13_DC_2	-1.17438	0.538493	-1.09343	-0.187162	2.42531	6.19991e-16	43	1CMET2-PWY: folate transformations III (E. coli)	0	CT13	DC	FALSE	2
CT13_DC_3	-1.78391	0.403559	-0.874755	-0.23782	-0.343417	5.74502e-16	44	1CMET2-PWY: folate transformations III (E. coli)	0	CT13	DC	FALSE	2
CT13_R_1	-1.78391	0.403559	-0.874755	-0.23782	-0.343417	5.74502e-16	45	1CMET2-PWY: folate transformations III (E. coli)	0	CT13	R	FALSE	3
CT13_R_2	-1.78391	0.403559	-0.874755	-0.23782	-0.343417	5.74502e-16	46	1CMET2-PWY: folate transformations III (E. coli)	0	CT13	R	FALSE	3
CT13_R_3	-1.78391	0.403559	-0.874755	-0.23782	-0.343417	5.74502e-16	47	1CMET2-PWY: folate transformations III (E. coli)	0	CT13	R	FALSE	3

## Sheet: CT14_PCA_Pathways
ID	PC1	PC2	PC3	PC4	PC5	PC6	index	taxa	relative_abundance	Patient	Location	present_bool	location_number
CT14_TI_1	4.49588	-3.34198	1.60988	3.32082	-2.61611	5.75512e-16	48	1CMET2-PWY: folate transformations III (E. coli)	0.000299532	CT14	TI	TRUE	0
CT14_TI_2	-4.19486	-0.356138	-0.658519	-0.807293	-0.390864	4.93249e-16	49	1CMET2-PWY: folate transformations III (E. coli)	0	CT14	TI	FALSE	0
CT14_TI_3	-4.19486	-0.356138	-0.658519	-0.807293	-0.390864	4.93249e-16	50	1CMET2-PWY: folate transformations III (E. coli)	0	CT14	TI	FALSE	0
CT14_AC_1	-4.19486	-0.356138	-0.658519	-0.807293	-0.390864	1.28079e-16	51	1CMET2-PWY: folate transformations III (E. coli)	0	CT14	AC	FALSE	1
CT14_AC_2	-4.19486	-0.356138	-0.658519	-0.807293	-0.390864	2.0331e-15	52	1CMET2-PWY: folate transformations III (E. coli)	0.000192962	CT14	AC	TRUE	1
CT14_AC_3	-4.19486	-0.356138	-0.658519	-0.807293	-0.390864	-2.70116e-16	53	1CMET2-PWY: folate transformations III (E. coli)	0	CT14	AC	FALSE	1
CT14_DC_1	10.5455	4.1758	-3.14032	-0.839104	-0.785403	5.75512e-16	54	1CMET2-PWY: folate transformations III (E. coli)	0.000507791	CT14	DC	TRUE	2
CT14_DC_2	-0.151245	5.02859	4.99843	-0.12466	0.400802	5.75512e-16	55	1CMET2-PWY: folate transformations III (E. coli)	0.000385619	CT14	DC	TRUE	2
CT14_DC_3	-1.32168	0.629184	-1.61802	4.06414	2.84038	5.75512e-16	56	1CMET2-PWY: folate transformations III (E. coli)	0.000399318	CT14	DC	TRUE	2
CT14_R_1	7.40587	-4.71091	1.44263	-2.38474	2.11464	5.75512e-16	57	1CMET2-PWY: folate transformations III (E. coli)	0.000449815	CT14	R	TRUE	3

[truncated: 10 more sheets: CT7_PCA_CompletePathways, CT8_PCA_CompletePathways, CT12_PCA_CompletePathways, CT13_PCA_CompletePathways, CT14_PCA_CompletePathways, CT7_PCA_Genes, CT8_PCA_Genes, CT12_PCA_Genes, CT13_PCA_Genes, CT14_PCA_Genes]
