# Supplementary material for: Microbial-enrichment method enables high-throughput metagenomic characterization from host-rich samples
Source: Springer Nature journal article supplement (doi:10.1038/s41592-023-02025-4), 2023-10-12
Supplement: MOESM15 [file 41592_2023_2025_MOESM15_ESM.xlsx]

## Sheet: Rbromii_SNP
Unnamed: 0	CT12_DC3	CT12_DC1	CT12_DC2	CT12_TI2	CT12_TI1	CT12_TI3_1
CT12_DC3	0	0.0297259	0.0359928	0.137416	0.0901457	0.0999871
CT12_DC1	0.0297259	0	0.0361809	0.12514	0.0824076	0.088704
CT12_DC2	0.0359928	0.0361809	0	0.120233	0.075825	0.0818305
CT12_TI2	0.137416	0.12514	0.120233	0	0.0908073	0.069684
CT12_TI1	0.0901457	0.0824076	0.075825	0.0908073	0	0.0582195
CT12_TI3_1	0.0999871	0.088704	0.0818305	0.069684	0.0582195	0

## Sheet: Rbromii_SCV
Unnamed: 0	CT12_DC3	CT12_DC1	CT12_DC2	CT12_TI2	CT12_TI1	CT12_TI3_1
CT12_DC3	0	0.0249302	0.0347465	0.137891	0.0863912	0.0949959
CT12_DC1	0.0249302	0	0.0354045	0.129545	0.081512	0.0873565
CT12_DC2	0.0347465	0.0354045	0	0.122342	0.0742221	0.0801624
CT12_TI2	0.137891	0.129545	0.122342	0	0.0888773	0.0658288
CT12_TI1	0.0863912	0.081512	0.0742221	0.0888773	0	0.0557011
CT12_TI3_1	0.0949959	0.0873565	0.0801624	0.0658288	0.0557011	0

## Sheet: Rbromii_AA
Unnamed: 0	CT12_DC3	CT12_DC1	CT12_DC2	CT12_TI2	CT12_TI1	CT12_TI3_1
CT12_DC3	0	0.0187267	0.0297874	0.0797815	0.0671273	0.0723791
CT12_DC1	0.0187267	0	0.0348947	0.0867431	0.0632198	0.0718987
CT12_DC2	0.0297874	0.0348947	0	0.0868255	0.0576707	0.0678196
CT12_TI2	0.0797815	0.0867431	0.0868255	0	0.0709403	0.0529179
CT12_TI1	0.0671273	0.0632198	0.0576707	0.0709403	0	0.0562211
CT12_TI3_1	0.0723791	0.0718987	0.0678196	0.0529179	0.0562211	0
